# Supplementary material for: Predicting gene expression from whole slide images in prostate cancer using deep learning
Source: Research Square preprint supplement (doi:10.21203/rs.3.rs-8770716/v1), 2026-02-04
Supplement: Supplementary file 2 [file 74f4d4817099cb4b59f19671.xlsx]

## Sheet: overall model
	gene	pcc	rmse
0	A1BG	0.00598839	0.0539896
1	A2M	0.236267	0.955696
2	A2ML1	0.283217	0.355853
3	A4GALT	0.477596	0.55282
4	AAAS	-0.112968	0.324311
5	AACS	0.478603	0.341628
6	AADAT	0.227673	0.749819
7	AAGAB	0.407074	0.300849
8	AAK1	0.0998411	0.459705
9	AAMDC	0.0225651	0.371796
10	AAMP	0.320898	0.380888
11	AANAT	-0.0435703	0.046219
12	AAR2	0.0709679	0.318765
13	AARD	0.0831473	0.278519
14	AARS1	0.305834	0.391479
15	AARS2	-0.120383	0.269535
16	AARSD1	0.19473	0.231009
17	AASDH	-0.0184685	0.341861
18	AASDHPPT	0.0517104	0.342945
19	AASS	-0.0850733	0.480054
20	AATBC	0.314865	0.393425
21	AATF	0.122467	0.289854
22	AATK	-0.0986918	0.490231
23	ABAT	0.401763	0.743605
24	ABCA1	0.0660543	0.60634
25	ABCA10	0.0556313	0.155777
26	ABCA12	0.0283249	0.182409
27	ABCA13	-0.109714	0.0386944
28	ABCA2	0.521672	0.453641
29	ABCA3	0.277637	0.474316
30	ABCA4	0.00639796	0.0997336
31	ABCA5	-0.171964	0.430828
32	ABCA6	0.335225	0.179073
33	ABCA7	0.142229	0.471468
34	ABCA8	0.408322	0.505783
35	ABCA9	0.0670422	0.203979
36	ABCB1	0.306956	0.568142
37	ABCB10	0.047892	0.403209
38	ABCB11	0.0447204	0.0751979
39	ABCB4	0.298308	0.105648
40	ABCB5	0.0723116	0.219224
41	ABCB6	0.135785	0.137009
42	ABCB7	0.0320381	0.283226
43	ABCB8	0.320051	0.338794
44	ABCB9	0.108121	0.151926
45	ABCC1	-0.138154	0.504414
46	ABCC10	0.0297399	0.380796
47	ABCC11	0.179313	0.983341
48	ABCC2	0.443017	0.0973141
49	ABCC3	0.51753	0.592542
50	ABCC4	0.315371	1.01569
51	ABCC5	0.383914	0.545907
52	ABCC6	0.4013	0.454452
53	ABCC8	-0.0044102	0.45575
54	ABCC9	0.5756	0.457915
55	ABCD1	0.303892	0.345492
56	ABCD2	0.422213	0.105651
57	ABCD3	0.145831	0.362945
58	ABCD4	-0.00408252	0.315284
59	ABCE1	0.379471	0.394119
60	ABCF1	0.0687359	0.390486
61	ABCF2	0.151243	0.291107
62	ABCF3	0.3296	0.239362
63	ABCG1	0.380667	0.519858
64	ABCG2	0.594277	0.46904
65	ABCG4	0.46626	0.0400432
66	ABCG5		0.0400432
67	ABCG8	0.068088	0.0439138
68	ABHD1	0.368482	0.372116
69	ABHD10	0.408834	0.431343
70	ABHD11	-0.0867678	0.634376
71	ABHD12	0.0974725	0.685683
72	ABHD12B	-0.0465707	0.0554314
73	ABHD13	0.228651	0.347044
74	ABHD14A	0.296214	0.540132
75	ABHD14B	0.397569	0.418281
76	ABHD15	0.154571	0.353497
77	ABHD16A	0.126767	0.217638
78	ABHD17A	-0.141748	0.410202
79	ABHD17B	0.0966189	0.491241
80	ABHD17C	0.370801	0.595358
81	ABHD18	0.0634208	0.30994
82	ABHD2	-0.00601296	0.999898
83	ABHD3	0.316988	0.430686
84	ABHD4	0.246938	0.402429
85	ABHD5	0.0762249	0.271223
86	ABHD6	0.627102	0.273359
87	ABHD8	-0.052113	0.453567
88	ABI1	0.0407428	0.405003
89	ABI2	-0.0786792	0.31422
90	ABI3	0.310463	0.540593
91	ABI3BP	0.357364	0.55984
92	ABITRAM	0.306558	0.351279
93	ABL1	0.0350612	0.446538
94	ABL2	0.0407313	0.304304
95	ABLIM1	0.218842	0.736091
96	ABLIM2	0.0132139	0.320508
97	ABLIM3	0.162803	0.524828
98	ABO	0.568971	0.666823
99	ABR	0.250926	0.39627
100	ABRACL	0.33042	0.653579
101	ABRAXAS1	0.258235	0.223714
102	ABRAXAS2	-0.0794155	0.316353
103	ABT1	0.0234599	0.303589
104	ABTB1	0.00364428	0.527101
105	ABTB2	0.100588	0.581098
106	ACAA1	0.352448	0.390655
107	ACAA2	0.536272	0.526389
108	ACACA	0.351969	0.641769
109	ACACB	0.614687	0.411101
110	ACAD10	0.213629	0.390574
111	ACAD11	-0.0733119	0.0901707
112	ACAD8	0.172556	0.866223
113	ACAD9	0.307801	0.295855
114	ACADL	0.584067	0.880359
115	ACADM	-0.00902178	0.5431
116	ACADS	0.263896	0.537036
117	ACADSB	-0.0797788	0.694871
118	ACADVL	0.245539	0.559465
119	ACAN	0.0500257	0.376093
120	ACAP1	0.333718	0.466289
121	ACAP2	0.107016	0.407601
122	ACAP3	0.0885129	0.490227
123	ACAT1	0.433949	0.485713
124	ACAT2	0.314647	0.599819
125	ACBD3	-0.173333	0.463474
126	ACBD4	-0.173404	0.491892
127	ACBD5	0.0457325	0.418388
128	ACBD6	0.25488	0.285601
129	ACBD7	0.321185	0.319361
130	ACCS	-0.293882	0.662523
131	ACD	-0.303946	0.449
132	ACE	0.322089	0.515013
133	ACE2	0.212225	0.0856151
134	ACER2	-0.125566	0.762236
135	ACER3	0.145201	0.74108
136	ACHE	0.257669	0.714068
137	ACIN1	-0.111505	0.414947
138	ACKR1	0.138147	1.12415
139	ACKR2	0.249974	0.307911
140	ACKR3	0.442973	0.686835
141	ACKR4	-0.0657052	0.0746739
142	ACLY	0.189201	0.647512
143	ACMSD	0.00812599	0.0440733
144	ACO1	0.371927	0.360693
145	ACO2	0.052304	0.429684
146	ACOT1	0.190662	0.500013
147	ACOT11	0.577464	0.29372
148	ACOT13	0.172918	0.323179
149	ACOT2	0.257265	0.490512
150	ACOT4	0.0964997	0.343996
151	ACOT7	-0.0311613	0.349436
152	ACOT8	0.327137	0.293116
153	ACOT9	0.168297	0.294877
154	ACOX1	0.270337	0.350046
155	ACOX2	0.526747	0.572189
156	ACOX3	0.314711	0.467709
157	ACOXL	0.314909	0.396097
158	ACP1	0.358858	0.311417
159	ACP2	0.568053	0.434673
160	ACP3	0.600512	1.27564
161	ACP4	0.0232688	0.313859
162	ACP5	0.330532	1.08522
163	ACP6	0.210176	0.360704
164	ACP7	0.379024	0.109164
165	ACR	0.146552	0.0960519
166	ACRBP	0.187927	0.30531
167	ACRV1	0.605347	0.270561
168	ACSBG1	0.25794	0.226733
169	ACSBG2	0.00853483	0.0667816
170	ACSF2	0.598597	0.640759
171	ACSF3	-0.201211	0.35127
172	ACSL1	0.0422107	0.704805
173	ACSL3	0.324024	0.747197
174	ACSL4	0.679249	0.471662
175	ACSL5	0.114962	1.11772
176	ACSL6	0.127446	0.076514
177	ACSM1	0.406241	1.71293
178	ACSM3	0.247094	0.861327
179	ACSM4	-0.150439	0.0395873
180	ACSM5	0.230005	0.109728
181	ACSS1	0.427806	0.471621
182	ACSS2	0.530157	0.299555
183	ACSS3	0.649829	0.294508
184	ACTA1	0.481586	1.4238
185	ACTA2	0.664075	0.87953
186	ACTB	0.358129	0.533321
187	ACTC1	0.692369	1.09788
188	ACTG1	0.201915	0.514473
189	ACTG2	0.678986	1.15031
190	ACTL6A	0.188131	0.43765
191	ACTN1	0.569589	0.571496
192	ACTN2	0.329721	0.871175
193	ACTN3	0.147743	0.0607672
194	ACTN4	0.512584	0.426111
195	ACTR10	0.372258	0.249085
196	ACTR1A	-0.153047	0.374159
197	ACTR1B	0.0359299	0.281453
198	ACTR2	0.0922975	0.528217
199	ACTR3	0.376077	0.35548
200	ACTR3B	0.443625	0.237615
201	ACTR3C	0.116989	0.200822
202	ACTR5	0.187312	0.283962
203	ACTR6	-0.0225218	0.317197
204	ACTR8	0.173834	0.355252
205	ACTRT3	0.269088	0.243196
206	ACVR1	0.201105	0.44472
207	ACVR1B	0.225413	0.435003
208	ACVR1C	0.0498749	0.0836646
209	ACVR2A	0.147666	0.374858
210	ACVR2B	0.179962	0.299031
211	ACVRL1	0.302151	0.493321
212	ACY1	0.288235	0.129587
213	ACY3	0.15035	0.767481
214	ACYP1	0.0161689	0.44287
215	ACYP2	0.0996097	0.279133
216	ADA	0.471071	0.322883
217	ADA2	0.466963	0.619451
218	ADAD2	0.226442	0.123036
219	ADAM10	0.0964762	0.543432
220	ADAM11	0.217549	0.266804
221	ADAM12	0.327019	0.235002
222	ADAM15	0.422155	0.360982
223	ADAM17	0.136012	0.308107
224	ADAM19	0.620236	0.402537
225	ADAM20	-0.128136	0.0581284
226	ADAM21	0.372598	0.30716
227	ADAM22	0.425684	0.541864
228	ADAM23	0.412798	0.238861
229	ADAM28	0.492792	0.425508
230	ADAM32	0.0344894	0.230777
231	ADAM33	0.627025	0.575779
232	ADAM8	0.174784	0.499546
233	ADAM9	-0.175113	0.794103
234	ADAMDEC1	0.245474	0.609846
235	ADAMTS1	0.622238	0.997264
236	ADAMTS10	0.495403	0.400635
237	ADAMTS12	0.366002	0.275924
238	ADAMTS13	0.288348	0.397501
239	ADAMTS14	0.191728	0.15866
240	ADAMTS15	0.586352	0.266189
241	ADAMTS16	-0.0502471	0.161997
242	ADAMTS17	0.17028	0.188349
243	ADAMTS18	0.0263485	0.128296
244	ADAMTS2	0.320359	0.65289
245	ADAMTS3	-0.139973	0.416024
246	ADAMTS4	0.308734	0.857905
247	ADAMTS5	0.644448	0.364905
248	ADAMTS6	0.0869582	0.231721
249	ADAMTS7	0.332929	0.195922
250	ADAMTS8	0.588631	0.438377
251	ADAMTS9	0.344856	0.512509
252	ADAMTSL1	0.247444	1.02883
253	ADAMTSL2	0.350449	0.53729
254	ADAMTSL3	0.403324	0.616196
255	ADAMTSL4	0.511499	0.352778
256	ADAMTSL5	0.151126	0.328116
257	ADAP1	-0.0784575	0.346771
258	ADAP2	0.283846	0.350559
259	ADAR	0.0649998	0.517979
260	ADARB1	0.0282662	0.382616
261	ADARB2	0.59238	0.549
262	ADAT1	0.0745602	0.423166
263	ADAT2	0.183219	0.418961
264	ADAT3	0.188904	0.381722
265	ADCK1	0.266513	0.279122
266	ADCK2	0.0733831	0.362891
267	ADCK5	0.243398	0.509991
268	ADCY1	-0.0177048	0.704374
269	ADCY10	0.0625361	0.136844
270	ADCY2	0.562486	0.474092
271	ADCY3	0.573138	0.480091
272	ADCY4	0.293928	0.411915
273	ADCY5	0.62573	0.577424
274	ADCY6	0.409325	0.545388
275	ADCY7	0.394248	0.296329
276	ADCY9	0.367093	0.373623
277	ADCYAP1	0.2887	0.267536
278	ADCYAP1R1	0.615361	0.201888
279	ADD1	0.368779	0.241251
280	ADD2	0.229613	0.442733
281	ADD3	0.353931	0.795123
282	ADGRA2	0.63992	0.776597
283	ADGRA3	-0.206818	0.3819
284	ADGRB1	0.205443	0.392784
285	ADGRB2	0.149526	0.356033
286	ADGRB3	0.553467	0.151458
287	ADGRD1	0.329575	0.379554
288	ADGRE1	0.373136	0.122391
289	ADGRE2	0.281504	0.261594
290	ADGRE3	0.185512	0.135934
291	ADGRE5	0.0839066	0.659359
292	ADGRF1	0.105904	1.18665
293	ADGRF3	-0.094255	0.105562
294	ADGRF5	0.0898056	1.38412
295	ADGRG1	0.0108093	0.580788
296	ADGRG2	0.404954	0.450597
297	ADGRG3	0.084481	0.135934
298	ADGRG5	0.424546	0.236181
299	ADGRG6	0.528407	0.592335
300	ADGRL1	0.300914	0.578527
301	ADGRL2	0.489609	0.572557
302	ADGRL3	0.578274	0.183496
303	ADGRL4	0.291091	0.542468
304	ADGRV1	0.113874	0.289253
305	ADH1B	0.350153	0.409762
306	ADH1C	0.0887658	0.807095
307	ADH5	0.637842	0.416771
308	ADH6	-0.157992	0.257545
309	ADHFE1	0.368074	0.52889
310	ADI1	0.449555	0.391553
311	ADIPOR1	0.203386	0.37917
312	ADIPOR2	0.0743589	0.354835
313	ADK	0.0386373	0.369556
314	ADM	0.125266	0.942781
315	ADM2	0.417885	0.666557
316	ADM5	-0.076613	0.357253
317	ADNP	-0.122357	0.475447
318	ADNP2	-0.168147	0.426763
319	ADO	0.0529211	0.286721
320	ADORA1	0.267082	0.165966
321	ADORA2A	0.0371455	0.0751173
322	ADORA2B	0.455553	0.360968
323	ADORA3	0.29393	0.353001
324	ADPGK	0.260685	0.573168
325	ADPRH	0.0382287	0.534321
326	ADPRHL1	-0.215468	0.499616
327	ADPRM	0.216569	0.602821
328	ADPRS	0.0942431	0.354212
329	ADRA1A	0.58644	0.373266
330	ADRA1B	0.373207	0.0970546
331	ADRA1D	0.524514	0.516924
332	ADRA2A	0.259547	0.916909
333	ADRA2B	0.378835	0.200862
334	ADRA2C	0.315447	0.842015
335	ADRB1	0.439724	0.703462
336	ADRB2	0.0555427	0.728877
337	ADRM1	0.351591	0.329503
338	ADSL	0.448726	0.156868
339	ADSS1	0.111325	0.345286
340	ADSS2	0.193797	0.472768
341	ADTRP	-0.00761726	0.370609
342	AEBP1	0.388647	0.89157
343	AEBP2	0.447254	0.334688
344	AEN	-0.0716366	0.474847
345	AFAP1	0.163459	0.258851
346	AFAP1L1	0.457555	0.32175
347	AFAP1L2	0.519074	0.573823
348	AFDN	-0.0780729	0.606451
349	AFF1	-0.239037	0.5281
350	AFF2	0.438981	0.13826
351	AFF3	0.369507	0.991282
352	AFF4	-0.0187487	0.518169
353	AFG1L	0.107903	0.190001
354	AFG3L2	0.0298386	0.433855
355	AFMID	0.531932	0.560261
356	AFTPH	-0.00890266	0.422713
357	AGA	0.396875	0.433157
358	AGAP1	0.270337	0.406661
359	AGAP2	0.193459	0.24672
360	AGAP3	0.0254598	0.400649
361	AGAP4	0.124082	0.337965
362	AGAP5	-0.0951029	0.0834517
363	AGAP6	0.412706	0.139254
364	AGAP9	-0.173853	0.495119
365	AGBL2	0.153499	0.208462
366	AGBL3	0.150993	0.198215
367	AGBL4	-0.15901	0.123759
368	AGBL5	0.178619	0.330695
369	AGER	0.0612423	0.627894
370	AGFG1	0.0510014	0.365277
371	AGFG2	0.259273	0.523771
372	AGGF1	0.198161	0.258826
373	AGK	0.447136	0.257899
374	AGL	0.234978	0.435316
375	AGMAT	0.458141	0.541363
376	AGMO	-0.00325974	0.252825
377	AGO1	-0.114807	0.311799
378	AGO2	0.271864	0.472476
379	AGO3	0.105276	0.290443
380	AGO4	0.352963	0.370982
381	AGPAT1	0.5759	0.296552
382	AGPAT2	0.0181448	0.580997
383	AGPAT3	0.410312	0.310573
384	AGPAT4	0.534866	0.202786
385	AGPAT5	-0.0100104	0.521987
386	AGPS	0.284122	0.434256
387	AGR2	-0.0719296	1.53799
388	AGRN	0.426202	0.609172
389	AGRP	0.116669	0.127395
390	AGT	0.0442244	1.53168
391	AGTPBP1	0.271251	0.382722
392	AGTR1	0.342163	1.29635
393	AGTRAP	0.417615	0.514622
394	AHCTF1	0.217626	0.346178
395	AHCY	0.42537	0.451919
396	AHCYL1	-0.209857	0.382568
397	AHCYL2	0.0188397	0.455129
398	AHDC1	0.48618	0.375428
399	AHI1	-0.117264	0.338287
400	AHNAK	0.508178	0.654064
401	AHNAK2	0.682373	0.510647
402	AHR	0.438404	0.581176
403	AHRR	-0.0730577	0.0848437
404	AHSA1	0.241522	0.362101
405	AIDA	0.27352	0.656717
406	AIF1	0.361956	0.724082
407	AIF1L	0.447882	0.451067
408	AIFM1	0.637956	0.305536
409	AIFM2	0.485532	0.370059
410	AIFM3	0.165065	0.17945
411	AIG1	0.417213	0.232915
412	AIM2	0.413866	0.32023
413	AIMP1	0.0765874	0.254781
414	AIMP2	0.660424	0.357575
415	AIP	-0.112975	0.461952
416	AIRE	0.133178	0.0542192
417	AJAP1	0.486312	0.199101
418	AJM1	0.369442	0.459904
419	AJUBA	0.530219	0.531204
420	AK1	0.179168	0.322587
421	AK2	0.434686	0.26553
422	AK3	0.141394	0.385669
423	AK4	0.319277	0.545131
424	AK5	0.327721	0.932716
425	AK6	0.181574	0.362517
426	AK7	0.156418	0.279196
427	AK8	0.131413	0.295578
428	AK9	0.0784033	0.269514
429	AKAP1	0.039716	0.451695
430	AKAP10	0.218051	0.309881
431	AKAP11	0.213774	0.531446
432	AKAP12	0.6865	0.659324
433	AKAP13	0.190057	0.529896
434	AKAP17A	0.271016	0.46592
435	AKAP3	0.290518	0.293078
436	AKAP5	0.360167	0.281497
437	AKAP6	0.492707	0.220315
438	AKAP7	0.529999	0.565884
439	AKAP8	0.115278	0.271477
440	AKAP8L	0.104882	0.442012
441	AKAP9	-0.126323	0.579616
442	AKIP1	0.115457	0.268181
443	AKIRIN1	0.237489	0.510335
444	AKIRIN2	0.298732	0.342282
445	AKNA	0.406921	0.466096
446	AKR1A1	0.473114	0.411891
447	AKR1B1	0.37442	0.635919
448	AKR1B10	-0.186998	0.215201
449	AKR1B15	-0.0589625	0.0639376
450	AKR1C1	0.26847	0.462872
451	AKR1C2	0.177283	0.351932
452	AKR1C3	0.160971	0.696934
453	AKR1E2	-0.0719129	0.386454
454	AKR7A2	0.227785	0.43556
455	AKR7A3	0.378555	0.453991
456	AKT1	0.0884736	0.411291
457	AKT1S1	0.45506	0.312086
458	AKT2	0.00111516	0.357167
459	AKT3	0.145678	0.517458
460	AKTIP	0.102616	0.295682
461	ALAD	0.598773	0.504911
462	ALAS1	0.272452	0.421315
463	ALAS2	0.0309995	0.095034
464	ALB	0.198262	1.02479
465	ALCAM	0.20951	0.631767
466	ALDH16A1	-0.280191	0.542084
467	ALDH18A1	0.401269	0.404546
468	ALDH1A1	0.147612	1.32274
469	ALDH1A2	0.726329	0.582056
470	ALDH1A3	0.310896	0.789753
471	ALDH1B1	0.422637	0.455585
472	ALDH1L1	0.129094	0.754999
473	ALDH1L2	0.580811	0.274689
474	ALDH2	0.591794	0.733038
475	ALDH3A1	0.273395	0.283083
476	ALDH3A2	0.595237	0.460837
477	ALDH3B1	0.410971	0.376991
478	ALDH4A1	0.483945	0.608819
479	ALDH5A1	0.114259	0.392351
480	ALDH6A1	0.308681	0.593738
481	ALDH7A1	0.228373	0.498284
482	ALDH8A1	-0.00463179	0.161745
483	ALDH9A1	0.224739	0.483602
484	ALDOA	0.18548	0.456268
485	ALDOB	0.053609	0.114098
486	ALDOC	0.302433	0.563455
487	ALG1	0.532246	0.290357
488	ALG10	-0.0637204	0.253069
489	ALG10B	-0.179516	0.353202
490	ALG11	-0.107022	0.282955
491	ALG12	0.0837223	0.385524
492	ALG13	0.349565	0.342337
493	ALG14	0.554954	0.208675
494	ALG1L2	0.145782	0.135886
495	ALG2	0.363665	0.40306
496	ALG3	0.472975	0.343477
497	ALG5	0.34522	0.423487
498	ALG6	0.525011	0.360493
499	ALG8	0.39028	0.329594
500	ALG9	0.109591	0.187612
501	ALK	0.0402073	0.0418258
502	ALKAL2	0.295201	0.252741
503	ALKBH1	0.297552	0.236143
504	ALKBH2	0.38735	0.476302
505	ALKBH3	0.145431	0.393494
506	ALKBH4	0.035631	0.316033
507	ALKBH5	0.131477	0.334634
508	ALKBH6	-0.0934483	0.207184
509	ALKBH7	0.282247	0.605322
510	ALKBH8	0.241551	0.26331
511	ALMS1	-0.0737492	0.393816
512	ALOX12	-0.0130722	0.149932
513	ALOX15	0.353281	1.05316
514	ALOX15B	0.544377	2.28285
515	ALOX5	-0.0085594	0.696453
516	ALOX5AP	0.291621	0.657734
517	ALPK1	0.468857	0.307928
518	ALPK2	0.100649	0.0920157
519	ALPK3	0.124625	0.445797
520	ALPL	0.179346	0.846276
521	ALS2	0.1413	0.284387
522	ALS2CL	0.399361	0.535126
523	ALX4	0.333929	0.352259
524	ALYREF	0.320792	0.402156
525	AMACR	0.41158	1.2409
526	AMBP	0.242704	0.305559
527	AMBRA1	0.0894237	0.317196
528	AMD1	0.198783	0.859185
529	AMDHD1	-0.0587047	0.119457
530	AMDHD2	0.0886942	0.42899
531	AMER1	0.293052	0.300495
532	AMFR	0.18626	0.314371
533	AMH	0.331636	0.656451
534	AMHR2	0.0480821	0.121036
535	AMIGO1	0.0798978	0.418203
536	AMIGO2	0.416095	0.649187
537	AMMECR1	0.334138	0.444945
538	AMMECR1L	0.0833822	0.36108
539	AMN	0.252665	0.199165
540	AMN1	-0.192803	0.279788
541	AMOT	0.479275	0.655031
542	AMOTL1	-0.301098	0.808728
543	AMOTL2	0.486909	0.621688
544	AMPD2	0.0827687	0.350731
545	AMPD3	0.181968	0.792998
546	AMPH	0.423978	0.189887
547	AMT	-0.220962	0.0809372
548	AMY2B	0.403649	0.400622
549	AMZ1	0.293407	0.0661062
550	AMZ2	0.0973164	0.244093
551	ANAPC1	0.181123	0.33391
552	ANAPC10	-0.0173256	0.146984
553	ANAPC11	0.261721	0.460448
554	ANAPC13	0.344442	0.31762
555	ANAPC15	0.184806	0.34651
556	ANAPC16	0.197772	0.312059
557	ANAPC2	-0.0150999	0.443026
558	ANAPC4	0.260689	0.35363
559	ANAPC5	0.411844	0.401214
560	ANAPC7	0.0586353	0.284032
561	ANG	0.55614	0.823567
562	ANGEL1	0.322187	0.350881
563	ANGEL2	-0.15163	0.379241
564	ANGPT1	0.717089	0.523244
565	ANGPT2	0.241789	0.523384
566	ANGPT4	0.31086	0.0873068
567	ANGPTL1	0.623619	0.492529
568	ANGPTL2	0.456492	0.745336
569	ANGPTL3	0.163554	0.668583
570	ANGPTL4	0.482018	1.05917
571	ANGPTL6	0.0202225	0.0963646
572	ANGPTL8	-0.0306402	0.126591
573	ANK1	0.30295	0.429652
574	ANK2	0.625039	0.266635
575	ANK3	0.288507	0.615977
576	ANKAR	-0.0522718	0.207698
577	ANKDD1A	0.488142	0.30318
578	ANKDD1B	0.460896	0.218614
579	ANKEF1	0.309864	0.304759
580	ANKFN1	0.0566609	0.101293
581	ANKFY1	0.19372	0.445525
582	ANKH	0.250598	0.711349
583	ANKHD1	0.198069	0.171713
584	ANKIB1	0.0192686	0.454837
585	ANKK1	0.125767	0.415319
586	ANKLE1	0.172696	0.163793
587	ANKLE2	-0.0404077	0.255658
588	ANKMY1	0.419351	0.263777
589	ANKMY2	0.256522	0.310772
590	ANKRA2	0.0515184	0.486259
591	ANKRD1	0.210428	0.837785
592	ANKRD10	0.0701673	0.62719
593	ANKRD11	-0.0576243	0.405023
594	ANKRD12	0.0659631	0.40896
595	ANKRD13A	0.455459	0.36056
596	ANKRD13B	0.534119	0.45606
597	ANKRD13C	0.16157	0.28339
598	ANKRD13D	-0.00132656	0.469827
599	ANKRD16	0.205828	0.410348
600	ANKRD17	-0.202496	0.514386
601	ANKRD18A	0.183848	0.277834
602	ANKRD18B	0.0928829	0.318559
603	ANKRD2	0.199314	0.387806
604	ANKRD22	-0.050901	0.714896
605	ANKRD23	0.032504	0.257701
606	ANKRD24	0.220801	0.471915
607	ANKRD26	-0.068682	0.231305
608	ANKRD27	0.279172	0.310945
609	ANKRD28	0.20279	0.331889
610	ANKRD29	0.213821	0.812575
611	ANKRD31	0.1023	0.0646865
612	ANKRD33B	0.63481	0.242718
613	ANKRD34A	-0.117703	0.354508
614	ANKRD35	0.625701	0.474915
615	ANKRD36	0.22227	0.168391
616	ANKRD36B	-0.109335	0.211828
617	ANKRD36C	0.242919	0.191099
618	ANKRD37	0.274554	0.81344
619	ANKRD39	-0.0619511	0.226302
620	ANKRD40	0.342287	0.357837
621	ANKRD42	0.237398	0.253171
622	ANKRD44	0.470933	0.296335
623	ANKRD45	-0.0294654	0.0834782
624	ANKRD46	0.0315999	0.365075
625	ANKRD49	0.00402392	0.342181
626	ANKRD50	0.160732	0.625273
627	ANKRD52	0.282621	0.443432
628	ANKRD53	0.258734	0.242025
629	ANKRD54	0.233809	0.307913
630	ANKRD55	0.137765	0.0853539
631	ANKRD6	0.150182	0.381405
632	ANKRD61	-0.151609	0.249992
633	ANKRD65	0.430123	0.634422
634	ANKRD9	0.0628563	0.460095
635	ANKS1A	0.282835	0.357745
636	ANKS1B	0.00358307	0.173525
637	ANKS3	0.373532	0.471608
638	ANKS6	0.310926	0.438704
639	ANKZF1	0.475703	0.568326
640	ANLN	0.538047	0.486561
641	ANO1	0.53048	0.614355
642	ANO10	0.050846	0.269702
643	ANO2	-0.0779965	0.164981
644	ANO3	0.162264	0.198202
645	ANO4	0.715206	0.438319
646	ANO5	0.520122	0.476317
647	ANO6	0.600052	0.565873
648	ANO7	0.481569	1.21491
649	ANO8	0.397528	0.422726
650	ANO9	0.196118	0.608346
651	ANOS1	0.177532	0.627782
652	ANP32A	0.209822	0.301038
653	ANP32B	-0.0118845	0.509043
654	ANP32E	0.672158	0.466022
655	ANPEP	0.523962	2.28813
656	ANTKMT	0.216316	0.580506
657	ANTXR1	0.560119	0.731948
658	ANTXR2	0.52997	0.709591
659	ANXA1	0.434088	0.898535
660	ANXA10	0.119949	0.189841
661	ANXA11	0.168299	0.431873
662	ANXA13	0.127415	0.206122
663	ANXA2	0.601873	0.673274
664	ANXA2R	-0.0953851	0.624277
665	ANXA3	0.240267	0.749121
666	ANXA4	0.518406	0.341036
667	ANXA5	0.0702003	0.49032
668	ANXA6	0.578681	0.617621
669	ANXA7	-0.00450571	0.352609
670	ANXA8	0.275751	0.362401
671	ANXA9	-0.0695411	0.587192
672	AOAH	0.349743	0.534305
673	AOC1	0.433353	1.61077
674	AOC2	-0.0924824	0.354143
675	AOC3	0.687752	0.701531
676	AOPEP	0.547027	0.416698
677	AOX1	0.744232	0.70239
678	AP1AR	0.12753	0.382878
679	AP1B1	0.406404	0.419265
680	AP1G1	0.248687	0.460177
681	AP1G2	0.0705455	0.57253
682	AP1M1	0.177004	0.205516
683	AP1M2	0.586638	0.387901
684	AP1S1	0.413826	0.425617
685	AP1S2	0.222467	0.349703
686	AP1S3	0.407418	0.386922
687	AP2A1	0.280786	0.301524
688	AP2A2	0.034116	0.297182
689	AP2B1	0.151298	0.40756
690	AP2M1	0.161521	0.302047
691	AP2S1	0.293168	0.647543
692	AP3B1	0.240545	0.377023
693	AP3B2	0.0634218	0.246581
694	AP3D1	0.369646	0.381506
695	AP3M1	0.017139	0.473938
696	AP3M2	0.0973016	0.408998
697	AP3S1	-0.243911	0.324975
698	AP3S2	0.110565	0.256202
699	AP4B1	-0.125954	0.355634
700	AP4E1	0.26609	0.281493
701	AP4M1	0.407134	0.34798
702	AP4S1	0.595262	0.134884
703	AP5B1	0.484376	0.333182
704	AP5M1	0.0269265	0.276867
705	AP5S1	0.0717629	0.296397
706	AP5Z1	0.0497866	0.403719
707	APAF1	0.0645888	0.452708
708	APBA1	0.151516	0.321809
709	APBA2	0.660725	0.485465
710	APBA3	0.0419347	0.299177
711	APBB1	0.495905	0.4822
712	APBB1IP	0.384717	0.500686
713	APBB2	0.28733	0.311401
714	APBB3	-0.0914238	0.503685
715	APC	0.178368	0.457046
716	APC2	0.189763	0.156356
717	APCDD1	0.288082	0.767746
718	APCDD1L	0.293772	0.113299
719	APEH	0.406762	0.426997
720	APEX1	0.530346	0.413581
721	APEX2	0.231186	0.318875
722	APH1A	0.131095	0.332621
723	APH1B	0.0945589	0.465489
724	API5	-0.0755522	0.333004
725	APIP	-0.0704318	0.382069
726	APLF	0.623669	0.17995
727	APLN	0.476068	0.717667
728	APLNR	0.0222595	0.643556
729	APLP1	-0.108239	0.553613
730	APLP2	0.404644	0.477765
731	APMAP	0.53562	0.432874
732	APOA1	0.0273128	0.294878
733	APOB	0.117738	0.103696
734	APOBEC2	0.0343257	0.39609
735	APOBEC3A	0.0125639	0.202213
736	APOBEC3B	0.189813	0.297955
737	APOBEC3C	0.629031	0.780365
738	APOBEC3D	0.387836	0.094059
739	APOBEC3F	0.418557	0.47241
740	APOBEC3G	0.514639	0.481921
741	APOBEC3H	0.12579	0.275344
742	APOBR	0.110467	0.500129
743	APOC1	0.110158	1.11246
744	APOD	-0.0925838	1.29484
745	APOE	0.0573371	1.21013
746	APOF	0.257244	1.0282
747	APOL1	0.480539	0.818254
748	APOL2	0.0945946	0.437103
749	APOL3	0.198263	0.662233
750	APOL4	0.00067789	1.33927
751	APOL6	0.464565	0.640815
752	APOLD1	0.203356	0.785283
753	APOM	0.179392	0.323238
754	APOO	0.319894	0.347176
755	APOOL	-0.113045	0.499788
756	APP	-0.128602	0.808379
757	APPBP2	-0.00713891	0.386893
758	APPL1	0.0353058	0.388251
759	APPL2	-0.0814189	0.516887
760	APRT	0.404086	0.637233
761	APTR	0.183201	0.320924
762	APTX	0.48347	0.169184
763	AQP1	0.258687	0.780077
764	AQP11	0.0404618	0.786546
765	AQP3	0.452189	0.938248
766	AQP5	0.463746	0.338739
767	AQP6	-0.125841	0.122119
768	AQP7	0.259616	0.147113
769	AQP8	0.0422672	0.185583
770	AQP9	0.17118	0.278481
771	AQR	-0.153495	0.391021
772	AR	-0.0343856	0.589429
773	ARAF	0.354345	0.398371
774	ARAP1	0.291206	0.427022
775	ARAP2	0.113092	0.384629
776	ARAP3	0.189129	0.494109
777	ARC	0.115216	0.448678
778	ARCN1	0.113647	0.423626
779	AREG	0.132754	0.952425
780	AREL1	0.235426	0.364749
781	ARF1	0.369068	0.472044
782	ARF3	0.34195	0.303084
783	ARF4	0.435981	0.417783
784	ARF5	0.274566	0.457756
785	ARF6	0.23822	0.409722
786	ARFGAP1	0.117803	0.450452
787	ARFGAP2	0.154983	0.316639
788	ARFGAP3	0.332767	0.506597
789	ARFGEF1	0.286897	0.378094
790	ARFGEF2	0.0557903	0.552512
791	ARFGEF3	0.35784	0.794428
792	ARFIP1	-0.0077171	0.394266
793	ARFIP2	0.54008	0.411643
794	ARFRP1	-0.142522	0.450366
795	ARG1	0.0995777	0.258018
796	ARG2	0.540742	1.14225
797	ARGLU1	-0.0378203	0.716852
798	ARHGAP1	0.395162	0.360239
799	ARHGAP10	0.545225	0.403111
800	ARHGAP11A	0.473429	0.314903
801	ARHGAP11B	-0.0429953	0.0882699
802	ARHGAP12	-0.123561	0.532349
803	ARHGAP15	0.480877	0.33828
804	ARHGAP17	0.413992	0.244012
805	ARHGAP18	0.238883	0.581886
806	ARHGAP19	-0.0700232	0.314764
807	ARHGAP20	0.658587	0.347425
808	ARHGAP21	0.05164	0.417555
809	ARHGAP22	0.280902	0.262267
810	ARHGAP23	0.637202	0.549654
811	ARHGAP24	0.459266	0.238172
812	ARHGAP25	0.441267	0.410187
813	ARHGAP26	-0.128	0.476152
814	ARHGAP27	0.381433	0.426372
815	ARHGAP28	0.125086	0.671336
816	ARHGAP29	-0.144041	0.591019
817	ARHGAP30	0.39913	0.556299
818	ARHGAP31	0.429319	0.4274
819	ARHGAP32	0.20973	0.539996
820	ARHGAP33	0.280136	0.546614
821	ARHGAP35	0.195702	0.444692
822	ARHGAP39	0.516671	0.407908
823	ARHGAP4	0.302305	0.570507
824	ARHGAP40	0.268851	0.605122
825	ARHGAP42	0.155029	0.336562
826	ARHGAP44	0.141694	0.31314
827	ARHGAP45	0.331848	0.550102
828	ARHGAP5	0.307075	0.56923
829	ARHGAP6	-0.160327	0.608875
830	ARHGAP8	0.0590532	0.293613
831	ARHGAP9	0.398543	0.458334
832	ARHGDIA	0.427799	0.425347
833	ARHGDIB	0.207008	0.888517
834	ARHGDIG	0.454366	0.746857
835	ARHGEF1	0.125415	0.458367
836	ARHGEF10	-0.0385265	0.124063
837	ARHGEF10L	0.364418	0.367203
838	ARHGEF11	0.212116	0.444113
839	ARHGEF12	0.104024	0.48834
840	ARHGEF15	0.20451	0.434164
841	ARHGEF16	0.428617	0.461405
842	ARHGEF17	0.400416	0.536327
843	ARHGEF18	-0.0660676	0.264284
844	ARHGEF19	0.171116	0.665348
845	ARHGEF2	0.522697	0.41459
846	ARHGEF25	0.633729	0.43964
847	ARHGEF26	0.376396	0.702596
848	ARHGEF28	0.521195	0.352688
849	ARHGEF3	0.124055	0.576898
850	ARHGEF33	0.101829	0.111975
851	ARHGEF35	0.209734	0.516444
852	ARHGEF37	0.339823	0.584215
853	ARHGEF38	0.445485	0.622574
854	ARHGEF39	0.333382	0.212298
855	ARHGEF4	0.0191824	0.402189
856	ARHGEF40	0.521633	0.423094
857	ARHGEF5	0.0125789	0.333693
858	ARHGEF6	0.351814	0.495
859	ARHGEF7	0.148604	0.455654
860	ARHGEF9	0.334156	0.253882
861	ARID1A	0.0104529	0.489535
862	ARID1B	0.0709777	0.331613
863	ARID2	0.00823837	0.369054
864	ARID3A	0.0392346	0.357583
865	ARID3B	0.233219	0.244078
866	ARID3C	-0.255247	0.133456
867	ARID4A	0.104446	0.389847
868	ARID4B	-0.00723858	0.377446
869	ARID5A	0.318761	0.802931
870	ARID5B	-0.0723211	0.573847
871	ARIH1	-0.0547163	0.315992
872	ARIH2	0.0799154	0.359749
873	ARL1	0.150395	0.378822
874	ARL10	0.536828	0.227833
875	ARL11	0.314588	0.174062
876	ARL13A	0.0352202	0.105787
877	ARL13B	-0.122295	0.421922
878	ARL14EP	-0.137788	0.251018
879	ARL15	-0.0629356	0.457665
880	ARL16	-0.122912	0.540045
881	ARL17A	-0.244996	0.164778
882	ARL17B	-0.116537	0.147176
883	ARL2	-0.17719	0.628506
884	ARL2BP	0.188171	0.169015
885	ARL3	-0.272651	0.393093
886	ARL4A	0.368116	0.509981
887	ARL4C	0.646919	0.548443
888	ARL4D	0.581701	0.664318
889	ARL5A	-0.0934326	0.413866
890	ARL5B	-0.135603	0.511428
891	ARL6	0.155815	0.320207
892	ARL6IP1	0.254371	0.470464
893	ARL6IP4	-0.0639599	0.188805
894	ARL6IP5	0.307738	0.466861
895	ARL6IP6	0.110118	0.38436
896	ARL8A	0.0297899	0.280622
897	ARL8B	0.345713	0.320099
898	ARL9	-0.14572	0.334855
899	ARMC1	0.0173088	0.365891
900	ARMC10	0.0552871	0.279699
901	ARMC12	0.113281	0.37645
902	ARMC2	0.108301	0.203903
903	ARMC5	0.0270926	0.461011
904	ARMC6	0.502145	0.343266
905	ARMC7	-0.0333661	0.40692
906	ARMC8	0.202619	0.271787
907	ARMC9	0.00012848	0.222726
908	ARMCX1	0.636559	0.86162
909	ARMCX2	0.35258	0.792113
910	ARMCX3	0.133319	0.396901
911	ARMCX4	0.493568	0.389356
912	ARMCX5	0.311631	0.33844
913	ARMCX6	0.343259	0.334274
914	ARMH1	0.269321	0.378756
915	ARMH3	0.210618	0.273722
916	ARMH4	0.551177	0.205294
917	ARMT1	0.0518369	0.375993
918	ARNT	0.319083	0.320958
919	ARNT2	0.0411287	0.519951
920	ARPC1A	0.132419	0.466558
921	ARPC1B	0.201877	0.131642
922	ARPC2	0.411708	0.327075
923	ARPC3	0.408257	0.345148
924	ARPC4	-0.0969863	0.470345
925	ARPC5	0.304307	0.2883
926	ARPC5L	0.385519	0.339646
927	ARPIN	-0.0759998	0.389894
928	ARPP19	0.261712	0.339555
929	ARR3	0.0250239	0.163288
930	ARRB1	0.516002	0.392766
931	ARRB2	0.155549	0.429081
932	ARRDC1	-0.21124	0.525623
933	ARRDC2	0.241073	0.658603
934	ARRDC3	0.335133	0.73533
935	ARRDC4	-0.0952381	0.525685
936	ARRDC5	0.310565	0.160343
937	ARSA	0.283843	0.529868
938	ARSB	0.1952	0.338574
939	ARSD	0.338102	0.510433
940	ARSG	0.363795	0.381921
941	ARSI	0.513252	0.268526
942	ARSJ	0.614677	0.477987
943	ARSK	0.277653	0.36309
944	ARSL	0.138453	0.231717
945	ART3	0.132128	0.31545
946	ART4	0.121615	0.502731
947	ART5	0.255819	0.324996
948	ARTN	-0.266172	0.385748
949	ARV1	0.247845	0.307277
950	ARVCF	0.524093	0.439303
951	ASAH1	-0.00964954	0.57206
952	ASAH2	-0.104899	0.112313
953	ASAH2B	0.248052	0.263248
954	ASAP1	0.384737	0.471905
955	ASAP2	0.224619	0.54518
956	ASAP3	0.227169	0.498447
957	ASB1	0.401383	0.325393
958	ASB12	0.430067	0.158449
959	ASB13	-0.02487	0.433668
960	ASB14	-0.17115	0.107055
961	ASB16	-0.0989727	0.276633
962	ASB2	0.655144	0.619009
963	ASB3	0.229674	0.363977
964	ASB4	0.160611	0.0839967
965	ASB6	-0.0389303	0.225722
966	ASB7	-0.0952338	0.291819
967	ASB8	0.0836667	0.2775
968	ASB9	-0.0993719	0.692824
969	ASCC1	-0.057686	0.362246
970	ASCC2	0.171254	0.263728
971	ASCC3	0.462377	0.458187
972	ASCL2	0.231821	0.774397
973	ASCL5	-0.0924272	0.121692
974	ASF1A	0.0246821	0.389104
975	ASF1B	0.629852	0.615555
976	ASGR1	0.218034	0.183578
977	ASGR2	0.155158	0.156597
978	ASH1L	0.195582	0.437282
979	ASH2L	0.141259	0.381708
980	ASIC1	0.130442	0.441818
981	ASIC2	0.446267	0.358696
982	ASIC3	0.311944	0.50482
983	ASIC4	0.124007	0.0886743
984	ASIP	-8.85595e-06	0.154728
985	ASL	0.328723	0.388079
986	ASMT	-0.226059	0.0739761
987	ASMTL	0.234953	0.357574
988	ASNS	0.298601	0.13098
989	ASNSD1	0.150667	0.214315
990	ASPA	0.602431	0.273237
991	ASPDH	-0.1122	0.163328
992	ASPG	0.018311	0.137862
993	ASPH	0.296857	0.540608
994	ASPHD1	0.322411	0.585183
995	ASPHD2	0.0775713	0.368469
996	ASPM	0.566021	0.312672
997	ASPN	0.213329	0.949666
998	ASPRV1	0.111022	0.27091
999	ASPSCR1	0.248255	0.428349
1000	ASRGL1	0.19825	0.787857
1001	ASS1	-0.176515	0.996336
1002	ASTE1	0.145115	0.276619
1003	ASTN1	0.17422	0.189203
1004	ASTN2	0.441528	0.71584
1005	ASXL1	0.034698	0.457363
1006	ASXL2	0.00664248	0.43688
1007	ASXL3	0.599529	0.143668
1008	ATAD1	0.282571	0.686212
1009	ATAD2	-0.0729468	0.615792
1010	ATAD2B	0.331194	0.332547
1011	ATAD3A	0.411159	0.434724
1012	ATAD3B	0.319415	0.58555
1013	ATAD3C	0.296653	0.471396
1014	ATAD5	0.395187	0.212195
1015	ATAT1	0.495728	0.467185
1016	ATE1	0.191421	0.417956
1017	ATF1	-0.0790876	0.433108
1018	ATF2	-0.122417	0.412016
1019	ATF3	0.358566	1.59782
1020	ATF4	0.40615	0.420197
1021	ATF5	0.294956	0.610994
1022	ATF6	0.230465	0.420593
1023	ATF6B	-0.0714847	0.425891
1024	ATF7	0.0744278	0.312101
1025	ATF7IP	0.281219	0.441043
1026	ATF7IP2	-0.0526729	0.514099
1027	ATG10	0.0489549	0.240221
1028	ATG101	0.272756	0.42772
1029	ATG12	-0.135102	0.275906
1030	ATG13	0.373405	0.306209
1031	ATG14	-0.0694122	0.373744
1032	ATG16L1	-0.077935	0.325083
1033	ATG16L2	0.1163	0.549876
1034	ATG2A	0.0296119	0.307249
1035	ATG2B	-0.221827	0.449382
1036	ATG3	0.316973	0.240402
1037	ATG4A	0.320962	0.353519
1038	ATG4B	-0.293082	0.393299
1039	ATG4C	-0.0638395	0.320302
1040	ATG4D	0.134435	0.356949
1041	ATG5	0.460263	0.366887
1042	ATG7	-0.05724	0.239474
1043	ATG9A	-0.0198161	0.554305
1044	ATG9B	0.507686	0.313579
1045	ATIC	0.137002	0.398479
1046	ATL1	0.0341402	0.414516
1047	ATL2	0.467826	0.382027
1048	ATL3	0.23927	0.381855
1049	ATM	0.360817	0.390498
1050	ATMIN	0.130833	0.492658
1051	ATN1	-0.109194	0.482187
1052	ATOH7	0.234427	0.143413
1053	ATOH8	0.333034	0.62248
1054	ATOX1	-0.166131	0.483117
1055	ATP10A	0.113738	0.331568
1056	ATP10B	0.0659339	0.0375478
1057	ATP10D	0.411149	0.474075
1058	ATP11A	0.343321	0.947242
1059	ATP11B	-0.0358611	0.703382
1060	ATP11C	0.274899	0.391575
1061	ATP13A1	0.432628	0.318744
1062	ATP13A2	0.371722	0.407322
1063	ATP13A3	-0.0448372	0.506931
1064	ATP13A4	0.142087	0.103311
1065	ATP1A1	0.0604514	0.925798
1066	ATP1A2	0.707518	0.794039
1067	ATP1A3	-0.12176	0.0308292
1068	ATP1A4	0.351309	0.109545
1069	ATP1B1	0.42572	0.807215
1070	ATP1B2	0.398401	0.448722
1071	ATP1B3	-0.171266	0.445235
1072	ATP23	-0.1728	0.236727
1073	ATP2A1	0.282096	0.489093
1074	ATP2A2	0.412656	0.544578
1075	ATP2A3	0.285342	0.839228
1076	ATP2B1	0.111071	0.493682
1077	ATP2B2	-0.0359836	0.0576799
1078	ATP2B4	0.721446	0.670967
1079	ATP2C1	0.380419	0.551685
1080	ATP2C2	0.248655	0.720103
1081	ATP5F1A	0.256042	0.433772
1082	ATP5F1B	0.409657	0.480102
1083	ATP5F1C	0.167716	0.376065
1084	ATP5F1D	0.0303154	0.713445
1085	ATP5F1E	0.147095	0.532406
1086	ATP5IF1	0.379422	0.418051
1087	ATP5MC1	0.345543	0.474015
1088	ATP5MC2	0.330189	0.407589
1089	ATP5MC3	0.248328	0.38998
1090	ATP5ME	0.332018	0.664488
1091	ATP5MF	0.331597	0.495531
1092	ATP5MG	0.219704	0.40399
1093	ATP5MGL	0.00862815	0.126741
1094	ATP5PB	0.270917	0.383525
1095	ATP5PD	0.195128	0.362733
1096	ATP5PF	0.113328	0.374137
1097	ATP5PO	0.203226	0.542643
1098	ATP6AP1	0.552355	0.39501
1099	ATP6AP2	0.0993473	0.331858
1100	ATP6V0A1	0.416649	0.336811
1101	ATP6V0A2	-0.125508	0.266605
1102	ATP6V0B	0.359203	0.45864
1103	ATP6V0C	0.00454266	0.183701
1104	ATP6V0D1	0.300027	0.417673
1105	ATP6V0D2	0.228783	0.259711
1106	ATP6V0E1	0.331251	0.326694
1107	ATP6V0E2	0.389878	0.578309
1108	ATP6V1A	0.0208476	0.482861
1109	ATP6V1B2	0.0959801	0.371046
1110	ATP6V1C1	-0.0290904	0.377151
1111	ATP6V1C2	0.131321	0.560644
1112	ATP6V1D	0.279214	0.33732
1113	ATP6V1E1	0.275496	0.324941
1114	ATP6V1E2	0.443185	0.269629
1115	ATP6V1F	0.261202	0.425914
1116	ATP6V1G1	0.387376	0.48136
1117	ATP6V1G2	0.275409	0.222826
1118	ATP6V1H	0.224624	0.356305
1119	ATP7A	-0.132458	0.462568
1120	ATP7B	0.227129	0.457761
1121	ATP8A1	0.183687	0.679668
1122	ATP8A2	0.423769	0.97466
1123	ATP8B1	0.275276	0.608909
1124	ATP8B2	0.400554	0.699733
1125	ATP8B3	0.155499	0.0862671
1126	ATP8B4	0.469891	0.63658
1127	ATP9A	0.0346717	0.535442
1128	ATP9B	-0.222436	0.307433
1129	ATPAF1	0.460398	0.25791
1130	ATPAF2	0.197422	0.267173
1131	ATPSCKMT	0.235801	0.313148
1132	ATR	0.368946	0.32265
1133	ATRAID	0.315943	0.297246
1134	ATRIP	0.212939	0.338866
1135	ATRN	-0.0942241	0.388311
1136	ATRNL1	0.651564	0.313735
1137	ATRX	-0.123214	0.420849
1138	ATXN1	0.0957028	0.482184
1139	ATXN10	0.0343322	0.356969
1140	ATXN1L	0.217754	0.439748
1141	ATXN2	-0.077815	0.421058
1142	ATXN2L	0.427966	0.472794
1143	ATXN3	0.0525635	0.251235
1144	ATXN7	0.0770845	0.383056
1145	ATXN7L1	0.125281	0.305079
1146	ATXN7L2	0.349544	0.265962
1147	ATXN7L3	0.32135	0.317435
1148	ATXN7L3B	-0.0653628	0.39255
1149	AUH	0.0255614	0.582829
1150	AUNIP	0.481932	0.176553
1151	AUP1	0.267917	0.355496
1152	AURKA	0.574845	0.44147
1153	AURKAIP1	0.347877	0.567136
1154	AURKB	0.501402	0.548439
1155	AURKC	-0.204658	0.239126
1156	AUTS2	0.644571	0.385409
1157	AVEN	0.1559	0.332231
1158	AVIL	0.174526	0.296909
1159	AVL9	0.361222	0.386492
1160	AVPI1	0.474714	0.718518
1161	AVPR1A	0.28501	0.439502
1162	AVPR2	0.357435	0.289661
1163	AXDND1	0.00750038	0.118595
1164	AXIN1	0.293911	0.386401
1165	AXIN2	0.535771	0.522346
1166	AXL	0.510658	0.615867
1167	AZGP1	0.627908	1.45883
1168	AZI2	-0.0814378	0.328301
1169	AZIN1	-0.139512	0.604756
1170	AZIN2	0.0499841	0.264884
1171	AZU1	0.140776	0.216282
1172	B2M	0.468733	0.735685
1173	B3GALNT1	0.241679	0.500424
1174	B3GALNT2	0.258842	0.355152
1175	B3GALT1	0.0458431	0.157451
1176	B3GALT2	0.635409	0.409574
1177	B3GALT4	0.362408	0.478095
1178	B3GALT5	0.190909	0.255968
1179	B3GALT6	0.477438	0.450599
1180	B3GAT1	0.253052	0.881257
1181	B3GAT2	-0.14744	0.0676732
1182	B3GAT3	0.162243	0.484066
1183	B3GLCT	0.0110081	0.335149
1184	B3GNT2	0.28766	0.492878
1185	B3GNT4	-0.096857	0.143507
1186	B3GNT5	0.305625	0.59021
1187	B3GNT7	0.312842	0.393531
1188	B3GNT8	0.524064	0.350511
1189	B3GNT9	0.463626	0.574588
1190	B3GNTL1	0.35737	0.24796
1191	B4GALNT1	0.496171	0.239661
1192	B4GALNT3	0.344998	0.485926
1193	B4GALNT4	0.668975	0.79917
1194	B4GALT1	0.371144	0.522856
1195	B4GALT2	0.0885442	0.36903
1196	B4GALT3	0.569067	0.311987
1197	B4GALT4	0.0165432	0.333066
1198	B4GALT5	0.349256	0.443934
1199	B4GALT6	0.104645	0.379869
1200	B4GALT7	-0.00545379	0.356929
1201	B4GAT1	-0.0272329	0.401097
1202	B9D1	0.354016	0.282529
1203	B9D2	0.116762	0.451556
1204	BAALC	0.165579	0.186131
1205	BAAT	0.16453	0.113616
1206	BABAM1	-0.0672417	0.475864
1207	BABAM2	0.241384	0.298877
1208	BACE1	0.585009	0.280442
1209	BACE2	0.189103	0.884159
1210	BACH1	-0.1498	0.528965
1211	BACH2	0.525456	0.222408
1212	BAD	0.275665	0.454685
1213	BAG1	-0.21496	0.466221
1214	BAG2	0.283762	0.458701
1215	BAG3	0.38451	0.522509
1216	BAG4	0.238476	0.410947
1217	BAG5	-0.0228515	0.299702
1218	BAG6	0.318609	0.291995
1219	BAHCC1	0.0358068	0.38767
1220	BAHD1	0.268793	0.319364
1221	BAIAP2	0.215208	0.480195
1222	BAIAP2L1	0.296259	0.436029
1223	BAIAP2L2	0.285685	0.935457
1224	BAIAP3	0.563907	0.602271
1225	BAK1	0.165604	0.34638
1226	BAMBI	0.0968938	1.05191
1227	BANF1	0.092528	0.4438
1228	BANK1	0.215218	1.18792
1229	BANP	0.155451	0.264771
1230	BAP1	0.527155	0.259075
1231	BARD1	0.352162	0.360088
1232	BARX2	0.154851	0.71795
1233	BASP1	0.114759	0.968337
1234	BATF	0.300905	0.775084
1235	BATF2	0.320232	0.4301
1236	BATF3	0.163733	0.349952
1237	BAX	0.176136	0.50245
1238	BAZ1A	0.285022	0.42845
1239	BAZ1B	-0.162279	0.386408
1240	BAZ2A	0.156996	0.527888
1241	BAZ2B	0.13325	0.348599
1242	BBC3	0.172237	0.466812
1243	BBIP1	-0.119235	0.261524
1244	BBOF1	-0.255716	0.289228
1245	BBOX1	0.0555404	0.396416
1246	BBS1	0.0439735	0.119651
1247	BBS10	-0.0820675	0.460763
1248	BBS12	-0.14083	0.334098
1249	BBS2	0.1324	0.441985
1250	BBS4	0.132916	0.676745
1251	BBS5	0.117678	0.284062
1252	BBS7	0.0230384	0.338039
1253	BBS9	0.284221	0.227062
1254	BBX	0.387022	0.459733
1255	BCAM	0.481211	0.740319
1256	BCAN	0.0374865	0.16215
1257	BCAP29	-0.0262827	0.16905
1258	BCAP31	0.401933	0.360748
1259	BCAR1	0.154058	0.405828
1260	BCAR3	0.507827	0.408215
1261	BCAS1	0.611281	0.83211
1262	BCAS2	0.340926	0.316652
1263	BCAS3	0.146336	0.342411
1264	BCAS4	0.509211	0.346626
1265	BCAT1	0.139781	0.444825
1266	BCAT2	0.414805	0.488666
1267	BCCIP	0.172794	0.331284
1268	BCDIN3D	0.42525	0.242341
1269	BCHE	0.210475	0.685349
1270	BCKDHA	0.0841409	0.114296
1271	BCKDHB	0.0585553	0.470264
1272	BCKDK	0.115186	0.366912
1273	BCL10	-0.0672134	0.35109
1274	BCL11A	0.337466	0.350739
1275	BCL11B	0.401041	0.296634
1276	BCL2	0.624153	0.526836
1277	BCL2A1	0.260842	0.604771
1278	BCL2L1	0.172044	0.314078
1279	BCL2L10	0.548145	0.498562
1280	BCL2L11	0.0219419	0.413638
1281	BCL2L12	0.236233	0.415478
1282	BCL2L13	0.22111	0.296616
1283	BCL2L14	-0.142372	0.447134
1284	BCL2L15	-0.0269595	0.182319
1285	BCL2L2	0.206966	0.447856
1286	BCL3	0.0841613	0.826247
1287	BCL6	0.302699	0.618086
1288	BCL6B	0.255563	0.49448
1289	BCL7A	0.258201	0.411351
1290	BCL7B	0.421912	0.263491
1291	BCL7C	-0.173225	0.445658
1292	BCL9	0.242942	0.495002
1293	BCL9L	0.310996	0.634782
1294	BCLAF1	-0.0634733	0.391219
1295	BCLAF3	-0.239622	0.362677
1296	BCO1	0.389179	0.287242
1297	BCO2	0.268812	0.166838
1298	BCOR	0.0631056	0.634379
1299	BCORL1	0.120811	0.39982
1300	BCR	0.106219	0.324189
1301	BCS1L	0.46392	0.414724
1302	BDH1	0.59358	0.437598
1303	BDH2	0.432914	0.49629
1304	BDKRB1	0.0952592	0.104979
1305	BDKRB2	0.394931	0.431536
1306	BDNF	0.529877	0.178646
1307	BDP1	-0.0322477	0.515436
1308	BEAN1	0.264426	0.16134
1309	BECN1	-0.112722	0.515135
1310	BEGAIN	0.461713	0.197586
1311	BEND3	0.580422	0.481239
1312	BEND4	0.279887	0.927985
1313	BEND5	0.405221	0.385112
1314	BEND6	0.506197	0.187759
1315	BEND7	0.240496	0.366275
1316	BEST1	0.25582	0.197509
1317	BEST4	-0.0813872	0.133798
1318	BET1	0.0306651	0.284607
1319	BET1L	0.022665	0.303776
1320	BEX1	0.509942	0.935841
1321	BEX2	0.142161	0.71202
1322	BEX3	0.336799	0.468953
1323	BEX4	0.348573	0.502636
1324	BEX5	0.231973	1.0098
1325	BFAR	0.279606	0.261777
1326	BFSP1	-0.229084	0.212851
1327	BFSP2	0.144058	0.0580583
1328	BGLAP	-0.0581258	0.393136
1329	BGN	0.195629	0.929897
1330	BHLHA15	0.368677	0.974965
1331	BHLHE22	0.340343	0.152374
1332	BHLHE40	0.438908	1.04987
1333	BHLHE41	0.261912	0.826147
1334	BHMT	0.259841	0.0705531
1335	BHMT2	0.648534	0.452496
1336	BICC1	0.19593	0.583133
1337	BICD1	0.51615	0.692155
1338	BICD2	0.511813	0.338965
1339	BICDL1	0.475883	0.476697
1340	BICDL2	-0.033601	0.626992
1341	BICRA	0.201635	0.35752
1342	BICRAL	-0.105126	0.420321
1343	BID	0.075803	0.321083
1344	BIK	0.61303	0.542986
1345	BIN1	0.315477	0.530164
1346	BIN2	0.344073	0.477814
1347	BIN3	0.468186	0.338533
1348	BIRC2	0.170669	0.409719
1349	BIRC3	0.313854	0.796497
1350	BIRC5	0.62844	0.619283
1351	BIRC6	-0.0989747	0.433951
1352	BIRC7	0.165404	0.194026
1353	BISPR	0.463798	0.32698
1354	BIVM	0.256422	0.360986
1355	BLACAT1	0.305002	0.0757766
1356	BLCAP	0.160317	0.308948
1357	BLK	0.345045	0.339519
1358	BLM	0.509281	0.207105
1359	BLMH	-0.0832195	0.380801
1360	BLNK	-0.0638934	0.431153
1361	BLOC1S1	0.00506843	0.636252
1362	BLOC1S2	0.190926	0.370383
1363	BLOC1S3	0.133223	0.283369
1364	BLOC1S4	0.391414	0.302256
1365	BLOC1S5	0.0324187	0.240104
1366	BLOC1S6	0.0809185	0.477859
1367	BLVRA	0.0869805	0.460042
1368	BLVRB	0.346054	0.577569
1369	BLZF1	0.0525394	0.370168
1370	BMERB1	0.561559	0.531098
1371	BMF	0.00826028	0.587079
1372	BMI1	-0.111143	0.394727
1373	BMP1	0.475711	0.39285
1374	BMP2	0.409995	0.499026
1375	BMP2K	0.253857	0.238107
1376	BMP4	0.419842	0.651569
1377	BMP5	0.189696	0.855641
1378	BMP6	0.378015	0.833181
1379	BMP7	0.199322	0.841698
1380	BMP8A	0.0849413	0.373048
1381	BMP8B	0.0255477	0.43359
1382	BMPER	0.420075	0.489381
1383	BMPR1A	0.347195	0.381595
1384	BMPR1B	0.294348	0.733874
1385	BMPR2	0.182788	0.462531
1386	BMS1	-0.183405	0.330445
1387	BMS1P4	0.0116311	0.156375
1388	BMX	-0.0484364	0.507302
1389	BNC1	0.418257	0.129647
1390	BNC2	0.62248	0.286197
1391	BNIP1	0.208097	0.344721
1392	BNIP2	0.469064	0.347621
1393	BNIP3	0.268681	0.443633
1394	BNIP3L	0.458293	0.470106
1395	BNIPL	0.566787	0.614429
1396	BOC	0.523649	0.589647
1397	BOD1	0.299256	0.323829
1398	BOD1L1	0.0417367	0.458998
1399	BOK	-0.01762	0.61077
1400	BOLA1	0.0831656	0.420685
1401	BOLA2B	-0.117465	0.228399
1402	BOLA3	0.36496	0.306748
1403	BOP1	0.426944	0.600808
1404	BORA	-0.0206065	0.225555
1405	BORCS5	0.0141236	0.240947
1406	BORCS6	-0.0303798	0.479515
1407	BORCS7	0.0778032	0.448738
1408	BORCS8	-0.225647	0.362552
1409	BPGM	-0.153885	0.370292
1410	BPHL	0.429683	0.359851
1411	BPI	0.402712	0.110307
1412	BPNT1	0.177729	0.356995
1413	BPNT2	0.0458947	0.4278
1414	BPTF	-0.0306698	0.494081
1415	BRAF	0.0690345	0.34716
1416	BRAP	-0.0940907	0.204212
1417	BRAT1	-0.0197242	0.45046
1418	BRCA1	0.510482	0.281616
1419	BRCA2	0.282843	0.158919
1420	BRCC3	0.321881	0.355903
1421	BRD1	-0.0602287	0.399571
1422	BRD2	0.375744	0.413469
1423	BRD3	0.0883047	0.523213
1424	BRD3OS	0.0774833	0.31602
1425	BRD4	0.22718	0.300126
1426	BRD7	-0.108206	0.341196
1427	BRD8	0.189013	0.363296
1428	BRD9	0.326811	0.295699
1429	BRF1	0.184075	0.2579
1430	BRF2	0.0565275	0.36767
1431	BRI3	0.179899	0.468121
1432	BRI3BP	0.332927	0.402893
1433	BRICD5	0.14848	0.498295
1434	BRINP1	-0.027414	0.633756
1435	BRINP2	0.0341534	0.0593175
1436	BRIP1	0.486676	0.186684
1437	BRIX1	0.434769	0.279565
1438	BRK1	0.462479	0.317282
1439	BRMS1	-0.0891121	0.527139
1440	BRMS1L	-0.0730641	0.272124
1441	BROX	-0.169988	0.411242
1442	BRPF1	0.1203	0.328829
1443	BRPF3	0.0839099	0.541456
1444	BRSK1	-0.0456691	0.613834
1445	BRSK2	0.549551	0.735853
1446	BRWD1	0.102572	0.357603
1447	BRWD3	0.27049	0.312382
1448	BSCL2	-0.107169	0.186197
1449	BSDC1	0.225649	0.335708
1450	BSG	0.243617	0.503312
1451	BSN	0.158838	0.161985
1452	BSPRY	0.460024	0.402442
1453	BST1	0.486923	0.280178
1454	BST2	0.453418	1.02589
1455	BTAF1	0.0607561	0.597562
1456	BTBD1	0.298489	0.330869
1457	BTBD10	-0.0625899	0.280355
1458	BTBD16	-0.069918	0.215598
1459	BTBD18	-0.0759937	0.032552
1460	BTBD19	0.333803	0.316789
1461	BTBD2	0.200493	0.33977
1462	BTBD3	0.375585	0.409165
1463	BTBD6	0.313717	0.350097
1464	BTBD7	0.0890929	0.368197
1465	BTBD8	0.0248193	0.292586
1466	BTBD9	0.0722363	0.331134
1467	BTC	-0.1077	0.40126
1468	BTD	0.493305	0.372507
1469	BTF3	0.282055	0.526501
1470	BTF3L4	0.393602	0.269254
1471	BTG1	0.313988	0.52831
1472	BTG2	0.172679	1.19546
1473	BTG3	0.442496	0.560081
1474	BTK	0.40575	0.365328
1475	BTLA	0.329011	0.255097
1476	BTN2A1	0.386652	0.389007
1477	BTN2A2	0.417616	0.372064
1478	BTN3A1	0.386412	0.539092
1479	BTN3A2	0.38255	0.635064
1480	BTN3A3	0.354595	0.518445
1481	BTNL8	-0.140892	0.04276
1482	BTNL9	0.277007	0.382875
1483	BTRC	-0.0369203	0.397279
1484	BUB1	0.570509	0.440681
1485	BUB1B	0.568646	0.401338
1486	BUB3	0.128407	0.336536
1487	BUD13	0.335166	0.309479
1488	BUD23	0.317105	0.33052
1489	BUD31	0.214801	0.313141
1490	BYSL	0.414712	0.357281
1491	BZW1	0.116643	0.445559
1492	BZW2	0.57157	0.499126
1493	C10orf143	-0.147992	0.210561
1494	C10orf55	0.252985	0.0596828
1495	C10orf67	0.19386	0.0329477
1496	C10orf88	-0.0441895	0.255244
1497	C11orf16	-0.0526382	0.166217
1498	C11orf21	0.273751	0.194707
1499	C11orf24	0.184373	0.315923
1500	C11orf42		0.315923
1501	C11orf54	0.331328	0.37159
1502	C11orf58	-0.0413815	0.305725
1503	C11orf65	-0.0957826	0.0937479
1504	C11orf68	-0.217807	0.393429
1505	C11orf71	0.196313	0.534382
1506	C11orf91	0.400579	0.0863213
1507	C11orf96	0.290205	1.1099
1508	C12orf42	0.258198	0.0455482
1509	C12orf43	-0.109661	0.196366
1510	C12orf56	-0.146325	0.494916
1511	C12orf57	0.171457	0.731645
1512	C12orf60	0.353748	0.444648
1513	C12orf71		0.444648
1514	C12orf75	0.584466	0.640092
1515	C12orf76	0.113358	0.310704
1516	C13orf46	0.217921	0.550037
1517	C14orf119	0.380542	0.260139
1518	C14orf132	0.451731	0.517661
1519	C14orf28	0.300069	0.235737
1520	C14orf93	0.105236	0.276533
1521	C15orf39	0.410569	0.442083
1522	C15orf40	0.0227345	0.179547
1523	C15orf48	0.117016	1.62622
1524	C15orf61	0.377312	0.25802
1525	C15orf62	0.329255	0.264783
1526	C16orf54	0.458285	0.569759
1527	C16orf74	0.488276	0.395672
1528	C16orf86	0.271032	0.388738
1529	C16orf87	0.241455	0.27415
1530	C16orf89	0.456207	0.62004
1531	C16orf95	0.344483	0.117307
1532	C16orf96	-0.0760559	0.12064
1533	C17orf100	0.184416	0.337247
1534	C17orf107	0.00612114	0.31961
1535	C17orf113	0.106597	0.329651
1536	C17orf58	0.234776	0.525457
1537	C17orf67	0.263515	0.277214
1538	C17orf75	0.0174935	0.294025
1539	C17orf78	-0.121091	0.103275
1540	C17orf99	0.229219	0.0726584
1541	C18orf21	-0.0719884	0.361971
1542	C18orf32	0.0402125	0.190198
1543	C18orf54	0.291339	0.172856
1544	C19orf12	0.395977	0.211494
1545	C19orf18	0.0457916	0.627719
1546	C19orf25	-0.249951	0.393293
1547	C19orf38	0.186041	0.343325
1548	C19orf44	0.055111	0.228199
1549	C19orf47	0.402487	0.225842
1550	C19orf53	0.0250116	0.530587
1551	C19orf67	-0.0149925	0.0992654
1552	C19orf73	0.165916	0.514208
1553	C19orf81	0.237247	0.93196
1554	C19orf84	0.0509377	0.0527631
1555	C1D	0.257059	0.373597
1556	C1GALT1	0.187638	0.32748
1557	C1GALT1C1	0.424026	0.365555
1558	C1GALT1C1L	0.158392	0.352143
1559	C1QA	0.219549	0.886138
1560	C1QB	0.231753	0.855093
1561	C1QBP	0.408304	0.458706
1562	C1QC	0.311662	0.816583
1563	C1QL1	0.224522	0.391033
1564	C1QL3	-0.250876	0.420076
1565	C1QL4	0.265522	0.0679003
1566	C1QTNF1	0.518052	0.686403
1567	C1QTNF12	0.073778	0.259882
1568	C1QTNF2	0.158406	0.422
1569	C1QTNF3	0.365311	0.942612
1570	C1QTNF4	0.189839	0.306226
1571	C1QTNF6	0.0842455	0.410103
1572	C1QTNF7	0.410125	0.5649
1573	C1R	0.380708	0.885872
1574	C1RL	0.21226	0.672708
1575	C1S	0.47349	0.858028
1576	C1orf115	0.327355	0.758904
1577	C1orf116	0.218084	0.595894
1578	C1orf122	0.364679	0.538533
1579	C1orf127	0.364225	0.107737
1580	C1orf131	0.323929	0.284439
1581	C1orf146	-0.155744	0.0741051
1582	C1orf159	0.232061	0.398025
1583	C1orf162	0.307311	0.40235
1584	C1orf174	0.265779	0.254308
1585	C1orf198	0.381305	0.332712
1586	C1orf21	0.180592	0.502366
1587	C1orf210	0.353034	0.435627
1588	C1orf216	0.343249	0.317714
1589	C1orf220	0.147252	0.168793
1590	C1orf226	-0.040242	0.511555
1591	C1orf35	0.199117	0.386492
1592	C1orf43	0.384236	0.394839
1593	C1orf50	-0.0282445	0.225673
1594	C1orf52	0.269569	0.26933
1595	C1orf53	0.427072	0.503449
1596	C1orf54	0.568233	0.540704
1597	C1orf56	0.387286	0.336739
1598	C1orf74	0.204436	0.360111
1599	C2	0.0305793	0.663502
1600	C20orf144	0.133052	0.239877
1601	C20orf202	-0.0545377	0.0717863
1602	C20orf204	0.447749	0.190612
1603	C20orf96	0.230001	0.611306
1604	C21orf58	0.553665	0.351723
1605	C21orf91	0.462884	0.296979
1606	C22orf15	0.100939	0.150698
1607	C22orf23	-0.177908	0.41303
1608	C22orf31	0.309659	0.155736
1609	C22orf39	0.150412	0.279305
1610	C2CD2	0.256819	0.33841
1611	C2CD2L	0.0927819	0.352936
1612	C2CD3	0.102045	0.315705
1613	C2CD4A	0.134397	0.674479
1614	C2CD4B	-0.0167027	0.7541
1615	C2CD4C	0.049353	0.521835
1616	C2CD4D	0.326698	0.43132
1617	C2CD5	-0.0601877	0.416045
1618	C2CD6	0.233566	0.0970699
1619	C2orf15	0.411488	0.316141
1620	C2orf42	-0.0923297	0.193
1621	C2orf49	0.0203305	0.376776
1622	C2orf66	0.245675	0.126492
1623	C2orf68	0.0599752	0.279251
1624	C2orf69	0.183059	0.399899
1625	C2orf72	0.205353	1.21107
1626	C2orf74	0.0516558	0.177182
1627	C2orf76	0.088159	0.348937
1628	C2orf81	0.081729	0.183497
1629	C2orf88	0.618259	0.381647
1630	C2orf92	0.443283	0.327102
1631	C3	0.272996	1.24718
1632	C3AR1	0.265786	0.521406
1633	C3orf18	0.432784	0.407654
1634	C3orf20	0.148954	0.0643877
1635	C3orf33	0.0457114	0.247205
1636	C3orf38	-0.108507	0.334636
1637	C3orf49	0.133421	0.0535838
1638	C3orf52	0.235245	0.388317
1639	C3orf62	0.174009	0.332806
1640	C3orf70	0.709612	0.440367
1641	C3orf80	0.0913787	0.348403
1642	C4A	0.225447	0.961694
1643	C4B	0.199073	0.999894
1644	C4BPA	-0.0223514	0.213991
1645	C4BPB	0.0760475	0.0540436
1646	C4orf19	0.192027	0.527394
1647	C4orf3	0.363715	0.358903
1648	C4orf33	0.375612	0.262469
1649	C4orf46	0.144281	0.310587
1650	C4orf50	0.426955	0.0967334
1651	C5	-0.242067	0.554846
1652	C5AR1	0.199235	0.632742
1653	C5AR2	0.13261	0.0965427
1654	C5orf15	0.0930289	0.4501
1655	C5orf22	0.0472013	0.36449
1656	C5orf24	-0.166038	0.533495
1657	C5orf34	0.531737	0.19808
1658	C5orf58	-0.0431014	0.0679009
1659	C5orf63	0.195961	0.285207
1660	C6	0.130933	0.380261
1661	C6orf120	0.0796747	0.458157
1662	C6orf132	0.126768	0.442109
1663	C6orf136	0.257194	0.337264
1664	C6orf141	-0.0729766	0.333004
1665	C6orf163	-0.10703	0.243842
1666	C6orf226	0.0989155	0.603321
1667	C6orf47	0.185445	0.251086
1668	C6orf52	0.288297	0.505778
1669	C6orf58	0.143622	0.0908688
1670	C6orf62	0.445422	0.410222
1671	C6orf89	0.323911	0.297365
1672	C7	0.534077	1.00389
1673	C7orf25	-0.103357	0.0979676
1674	C7orf50	-0.153995	0.484375
1675	C7orf57	0.154544	0.245433
1676	C8G	0.201161	0.32878
1677	C8orf33	0.330519	0.384447
1678	C8orf48	0.115966	0.109172
1679	C8orf58	0.0221546	0.38572
1680	C8orf76	0.0492661	0.313532
1681	C8orf82	-0.0427594	0.641219
1682	C8orf88	0.780433	0.378993
1683	C9orf152	0.23692	0.628629
1684	C9orf153	-0.153016	0.0936336
1685	C9orf163	0.652512	0.237085
1686	C9orf40	0.327109	0.319296
1687	C9orf43	0.483741	0.187524
1688	C9orf50	0.0516708	0.0915307
1689	C9orf72	0.0254272	0.462882
1690	C9orf78	0.0972679	0.276782
1691	C9orf85	0.263978	0.286676
1692	CA11	0.541895	0.613654
1693	CA12	0.201511	0.580742
1694	CA13	0.166247	0.561318
1695	CA14	0.576446	0.441387
1696	CA2	0.230295	0.67228
1697	CA3	-0.133337	1.25237
1698	CA4	0.232703	0.410653
1699	CA5B	-0.174437	0.458209
1700	CA8	0.148885	0.519766
1701	CA9	-0.0564412	0.19463
1702	CAAP1	0.122694	0.3719
1703	CAB39	0.0314403	0.434421
1704	CAB39L	0.0368984	0.614701
1705	CABCOCO1	0.176209	0.753435
1706	CABIN1	-0.110976	0.364503
1707	CABLES1	0.465654	0.325358
1708	CABLES2	0.320356	0.322409
1709	CABP1	0.425253	0.162904
1710	CABP4	0.614559	0.394028
1711	CABP7	-0.180842	0.0931415
1712	CABYR	0.277189	0.175288
1713	CACFD1	0.478319	0.460468
1714	CACHD1	0.57619	0.485586
1715	CACNA1A	0.244816	0.0760185
1716	CACNA1C	0.449172	0.387619
1717	CACNA1D	0.62429	1.0322
1718	CACNA1E	0.223467	0.0265065
1719	CACNA1F	0.327682	0.0581477
1720	CACNA1G	0.357145	0.472175
1721	CACNA1H	0.316003	0.88474
1722	CACNA1I	0.356943	0.191033
1723	CACNA1S	-0.225709	0.202509
1724	CACNA2D1	0.612644	0.719745
1725	CACNA2D2	0.222955	0.435334
1726	CACNA2D3	0.514413	0.296313
1727	CACNA2D4	0.240325	0.130039
1728	CACNB1	0.578396	0.329875
1729	CACNB2	0.243139	0.287691
1730	CACNB3	0.30571	0.430535
1731	CACNB4	0.325674	0.218501
1732	CACNG4	0.694999	1.0358
1733	CACNG8	0.0268778	0.0443525
1734	CACTIN	-0.0979445	0.267233
1735	CACUL1	-0.0817621	0.297016
1736	CACYBP	0.110353	0.341303
1737	CAD	0.555113	0.431697
1738	CADM1	-0.0318646	0.691588
1739	CADM2	0.195144	0.599896
1740	CADM3	0.285316	0.377724
1741	CADM4	0.476641	0.423943
1742	CADPS	0.558229	0.79338
1743	CADPS2	-0.00773882	0.510509
1744	CAGE1	0.377723	0.0407489
1745	CAHM	0.178159	0.396428
1746	CALB1	0.154987	0.0500422
1747	CALB2	0.0614286	0.194762
1748	CALCB	0.322545	0.0983794
1749	CALCOCO1	0.237273	0.397247
1750	CALCOCO2	0.197901	0.264368
1751	CALCR	0.110105	0.0507727
1752	CALCRL	0.269175	0.65449
1753	CALD1	0.65179	0.675449
1754	CALHM2	0.570634	0.450861
1755	CALHM5	0.449523	0.228059
1756	CALHM6	0.205521	0.317504
1757	CALM1	0.668256	0.399464
1758	CALM2	-0.0401669	0.39696
1759	CALM3	-0.0427473	0.382586
1760	CALML4	-0.135939	0.0509703
1761	CALML6	-0.0332592	0.277579
1762	CALN1	0.183936	0.284624
1763	CALR	0.489138	0.643718
1764	CALU	-0.00330786	0.47394
1765	CALY	0.0555406	0.149974
1766	CAMK1	0.375435	0.429742
1767	CAMK1D	0.426212	0.533731
1768	CAMK1G	0.386327	0.363094
1769	CAMK2A	0.573489	0.205296
1770	CAMK2B	0.501173	0.668019
1771	CAMK2D	0.085692	0.530864
1772	CAMK2G	0.618469	0.361382
1773	CAMK2N1	0.204605	1.04282
1774	CAMK2N2	0.191382	0.58876
1775	CAMK4	0.279689	0.421942
1776	CAMKK1	-0.283447	0.448857
1777	CAMKK2	0.363191	0.824068
1778	CAMKMT	-0.0236564	0.236688
1779	CAMLG	0.0469407	0.293072
1780	CAMP	0.0555873	0.295015
1781	CAMSAP1	-0.014037	0.410775
1782	CAMSAP2	0.280707	0.366996
1783	CAMSAP3	0.540463	0.523045
1784	CAMTA1	0.0340585	0.222973
1785	CAMTA2	0.256114	0.371456
1786	CAND1	0.00253386	0.401458
1787	CAND2	0.637002	0.342529
1788	CANT1	0.472092	0.523052
1789	CANX	0.293187	0.50872
1790	CAP1	0.442574	0.269329
1791	CAP2	0.515049	0.631066
1792	CAPG	0.52062	0.825759
1793	CAPN1	0.267175	0.38709
1794	CAPN10	0.0722399	0.36311
1795	CAPN11	0.0634571	0.12315
1796	CAPN12	0.236448	0.207213
1797	CAPN13	0.26719	0.521211
1798	CAPN14	-0.0379861	0.126784
1799	CAPN15	0.606315	0.382028
1800	CAPN2	0.391143	0.56207
1801	CAPN3	0.0657246	0.183978
1802	CAPN5	-0.109081	0.869242
1803	CAPN6	0.510225	0.738757
1804	CAPN7	0.00755798	0.370484
1805	CAPN8	0.323213	0.441594
1806	CAPN9	0.0378157	0.556417
1807	CAPNS1	0.179156	0.409302
1808	CAPRIN1	0.119425	0.437042
1809	CAPRIN2	-0.0122237	0.359007
1810	CAPS	0.109711	0.832363
1811	CAPS2	0.203176	0.260936
1812	CAPZA1	0.215821	0.380532
1813	CAPZA2	0.283007	0.364061
1814	CAPZB	0.334772	0.28861
1815	CARD10	-0.0968404	0.466222
1816	CARD11	0.440482	0.447068
1817	CARD14	0.0963952	0.275589
1818	CARD16	0.412522	0.466552
1819	CARD19	0.157608	0.340653
1820	CARD6	0.277028	0.340624
1821	CARD8	0.277186	0.257409
1822	CARD9	0.34023	0.279945
1823	CARF	0.250665	0.286556
1824	CARHSP1	0.0657306	0.388811
1825	CARM1	0.136928	0.414047
1826	CARMIL1	0.229541	0.449746
1827	CARMIL2	0.284211	0.347156
1828	CARMIL3	0.183549	0.128611
1829	CARNMT1	0.280652	0.367923
1830	CARNS1	-0.0436061	0.220264
1831	CARS1	0.0216884	0.310074
1832	CARS2	-0.0157395	0.4417
1833	CASC11	0.407977	0.216842
1834	CASC18	0.257841	0.0913995
1835	CASC2	-0.0172737	0.132235
1836	CASC3	-0.0256759	0.327368
1837	CASC8	0.430688	0.315715
1838	CASC9	-0.0470076	0.236294
1839	CASD1	0.00514142	0.477118
1840	CASK	-0.0854059	0.275786
1841	CASKIN1	0.591844	0.355631
1842	CASKIN2	0.500895	0.31734
1843	CASP1	0.440056	0.542694
1844	CASP10	0.34964	0.421808
1845	CASP2	0.0466139	0.544683
1846	CASP3	0.353382	0.325794
1847	CASP4	0.35071	0.472884
1848	CASP5	0.189583	0.0667654
1849	CASP6	0.0678893	0.369642
1850	CASP7	0.291817	0.566476
1851	CASP8	0.157452	0.436234
1852	CASP8AP2	0.319492	0.424337
1853	CASP9	0.058009	0.295635
1854	CASQ1	0.634227	0.696195
1855	CASQ2	0.550477	0.698717
1856	CASR	-0.0132915	0.0311258
1857	CASS4	0.296838	0.214695
1858	CAST	0.282773	0.419749
1859	CASTOR1	0.0425969	0.146798
1860	CASTOR2	0.224678	0.370463
1861	CASZ1	-0.0181006	0.488956
1862	CAT	0.256527	0.547853
1863	CATIP	0.271719	0.291355
1864	CATSPER1	-0.00593028	0.108487
1865	CATSPER2	0.0609812	0.310628
1866	CATSPER3	0.218467	0.200338
1867	CATSPERB	0.248171	0.298011
1868	CATSPERE	0.26402	0.134351
1869	CATSPERG	-0.0109212	0.19364
1870	CAV1	0.725716	0.689612
1871	CAV2	0.723151	0.476031
1872	CAVIN1	0.655159	0.666235
1873	CAVIN2	0.603665	0.721989
1874	CAVIN3	0.416126	0.6332
1875	CAVIN4	-0.102398	0.424933
1876	CBARP	-0.0764344	0.248685
1877	CBFA2T2	-0.0798449	0.599356
1878	CBFA2T3	-0.163222	0.53078
1879	CBFB	0.18062	0.443387
1880	CBL	0.573318	0.347336
1881	CBLB	0.0864635	0.335778
1882	CBLC	0.3431	0.912548
1883	CBLL1	0.141721	0.56534
1884	CBLN1	0.0198833	0.254109
1885	CBLN3	0.252637	0.409097
1886	CBLN4	-0.0580583	0.108057
1887	CBR1	0.429914	0.525801
1888	CBR3	0.0594559	0.823122
1889	CBR4	0.472229	0.505059
1890	CBS	0.261584	0.477788
1891	CBX1	0.00580376	0.384892
1892	CBX2	0.472817	0.526037
1893	CBX3	0.583479	0.427139
1894	CBX4	0.152401	0.520148
1895	CBX5	0.0951437	0.411423
1896	CBX6	0.0426362	0.519391
1897	CBX7	0.647283	0.42309
1898	CBX8	0.613484	0.379578
1899	CBY1	0.290489	0.367982
1900	CBY3	0.074574	0.138579
1901	CC2D1A	-0.289274	0.390738
1902	CC2D1B	0.108089	0.276714
1903	CC2D2A	0.145296	0.344787
1904	CC2D2B	0.335978	0.0797144
1905	CCAR1	0.217182	0.370343
1906	CCAR2	0.226955	0.391043
1907	CCBE1	0.520631	0.317349
1908	CCDC102A	0.209036	0.453728
1909	CCDC102B	0.147488	0.238274
1910	CCDC106	0.177683	0.466388
1911	CCDC107	0.106865	0.492884
1912	CCDC110	0.388761	0.415938
1913	CCDC112	0.0970595	0.408027
1914	CCDC115	0.292502	0.315731
1915	CCDC116	0.123043	0.103062
1916	CCDC117	-0.22899	0.414068
1917	CCDC12	-0.0341974	0.384872
1918	CCDC120	0.105147	0.365296
1919	CCDC121	-0.194247	0.341376
1920	CCDC122	0.0139985	0.303589
1921	CCDC124	0.0482525	0.513718
1922	CCDC125	0.32818	0.476159
1923	CCDC126	0.0363232	0.327525
1924	CCDC127	-0.0897038	0.213416
1925	CCDC13	-0.0469926	0.0678819
1926	CCDC134	-0.0706042	0.379363
1927	CCDC136	0.412218	0.470843
1928	CCDC137	-0.0363733	0.389705
1929	CCDC138	0.60883	0.320673
1930	CCDC14	0.408528	0.498115
1931	CCDC141	0.0512009	0.396432
1932	CCDC142	0.342213	0.324432
1933	CCDC144A	-0.123259	0.258423
1934	CCDC146	0.233093	0.417202
1935	CCDC148	-0.0757238	0.142317
1936	CCDC149	0.327438	0.311491
1937	CCDC15	0.0553631	0.338982
1938	CCDC150	0.413494	0.074229
1939	CCDC152	0.20694	0.19055
1940	CCDC154	-0.156007	0.763508
1941	CCDC157	0.278027	0.210196
1942	CCDC158	0.201962	0.148413
1943	CCDC159	0.403587	0.523115
1944	CCDC163	0.309675	0.468036
1945	CCDC167	0.249199	0.554752
1946	CCDC168	0.105482	0.0288692
1947	CCDC17	0.177787	0.449822
1948	CCDC170	-0.00909129	0.364522
1949	CCDC171	0.192565	0.120351
1950	CCDC174	0.106586	0.216874
1951	CCDC18	0.369647	0.150548
1952	CCDC180	0.253839	0.133291
1953	CCDC181	0.453584	0.155971
1954	CCDC183	-0.114249	0.377318
1955	CCDC184	0.00485643	0.347365
1956	CCDC186	-0.147829	0.678332
1957	CCDC187	0.131052	0.277981
1958	CCDC188	-0.00956431	0.279061
1959	CCDC191	-0.0693251	0.334597
1960	CCDC192	0.0149799	0.109497
1961	CCDC194	0.260827	0.257999
1962	CCDC196	0.0556798	0.0285464
1963	CCDC200	0.151403	0.171509
1964	CCDC22	0.413831	0.401268
1965	CCDC24	0.315585	0.484843
1966	CCDC25	0.234353	0.345257
1967	CCDC26	-0.318749	0.0809152
1968	CCDC28A	0.42509	0.435419
1969	CCDC28B	0.0411413	0.396479
1970	CCDC3	0.277843	0.778891
1971	CCDC30	-0.116205	0.135277
1972	CCDC32	-0.134698	0.238993
1973	CCDC34	0.396296	0.348215
1974	CCDC38	0.0348134	0.0381426
1975	CCDC39	-0.230077	0.0356547
1976	CCDC40	0.507601	0.42546
1977	CCDC43	0.289371	0.277885
1978	CCDC47	0.209247	0.430465
1979	CCDC50	-0.10728	0.49812
1980	CCDC51	0.27222	0.337366
1981	CCDC57	0.0363447	0.499368
1982	CCDC59	0.0677797	0.25694
1983	CCDC6	0.379555	0.502141
1984	CCDC61	-9.54351e-05	0.44513
1985	CCDC62	0.162571	0.0766108
1986	CCDC65	-0.109868	0.312807
1987	CCDC66	0.1116	0.305361
1988	CCDC68	0.473082	0.432563
1989	CCDC69	0.667373	0.556202
1990	CCDC7	-0.0164638	0.183511
1991	CCDC71	-0.0369223	0.33824
1992	CCDC71L	0.253987	0.417783
1993	CCDC73	0.144741	0.0453903
1994	CCDC74A	0.386574	0.812312
1995	CCDC74B	0.487946	0.639906
1996	CCDC77	0.142397	0.32563
1997	CCDC78	0.482552	0.688732
1998	CCDC8	0.596273	0.579767
[truncated: 14,060 more rows]

## Sheet: no postion
	gene	pcc	rmse
0	A1BG	0.195547	0.0497947
1	A2M	0.220873	1.02332
2	A2ML1	0.402117	0.363758
3	A4GALT	0.445074	0.623445
4	AAAS	-0.177864	0.292464
5	AACS	0.262417	0.351158
6	AADAT	0.192408	0.762573
7	AAGAB	0.126569	0.334488
8	AAK1	0.212326	0.450926
9	AAMDC	0.165734	0.406669
10	AAMP	0.390033	0.25696
11	AANAT	-0.0690424	0.0466412
12	AAR2	0.0617619	0.329779
13	AARD	0.110522	0.27813
14	AARS1	0.214412	0.413148
15	AARS2	-0.0981067	0.285468
16	AARSD1	-0.00869206	0.237843
17	AASDH	0.00447336	0.348842
18	AASDHPPT	-0.0447375	0.352971
19	AASS	-0.0631674	0.518761
20	AATBC	0.267676	0.359973
21	AATF	0.042781	0.322434
22	AATK	-0.072336	0.47346
23	ABAT	0.346237	0.770398
24	ABCA1	-0.0146703	0.66186
25	ABCA10	0.0203122	0.22736
26	ABCA12	0.126574	0.182256
27	ABCA13	0.28328	0.061881
28	ABCA2	0.460449	0.477556
29	ABCA3	0.259657	0.46715
30	ABCA4	0.185704	0.096495
31	ABCA5	-0.0728607	0.404588
32	ABCA6	0.297151	0.18557
33	ABCA7	-0.0625188	0.49159
34	ABCA8	0.38666	0.549174
35	ABCA9	0.148836	0.207891
36	ABCB1	0.315397	0.601753
37	ABCB10	-0.149564	0.449187
38	ABCB11	-0.113475	0.0758695
39	ABCB4	0.0876018	0.120128
40	ABCB5	-0.00153797	0.228509
41	ABCB6	0.215504	0.138189
42	ABCB7	-0.0964322	0.296329
43	ABCB8	0.304753	0.339847
44	ABCB9	-0.0366823	0.15701
45	ABCC1	-0.0825286	0.523996
46	ABCC10	-0.0224843	0.388488
47	ABCC11	0.155031	0.997363
48	ABCC2	0.304433	0.104526
49	ABCC3	0.491565	0.6556
50	ABCC4	0.26696	1.03803
51	ABCC5	0.325877	0.547724
52	ABCC6	0.367504	0.467205
53	ABCC8	-0.0667512	0.457716
54	ABCC9	0.546528	0.451921
55	ABCD1	0.141973	0.373611
56	ABCD2	0.40404	0.106245
57	ABCD3	0.0101523	0.400769
58	ABCD4	-0.100215	0.364764
59	ABCE1	0.204928	0.448653
60	ABCF1	0.0625471	0.404366
61	ABCF2	0.0766677	0.293685
62	ABCF3	0.507126	0.32994
63	ABCG1	0.214405	0.558651
64	ABCG2	0.577821	0.461592
65	ABCG4	0.179142	0.0509716
66	ABCG5		0.0509716
67	ABCG8	0.0936667	0.0574018
68	ABHD1	0.307772	0.379699
69	ABHD10	0.355892	0.405443
70	ABHD11	0.140131	0.613216
71	ABHD12	0.172015	0.684806
72	ABHD12B	-0.194435	0.040501
73	ABHD13	0.0850449	0.372879
74	ABHD14A	0.11092	0.571434
75	ABHD14B	0.266354	0.477411
76	ABHD15	0.082541	0.380672
77	ABHD16A	-0.0565612	0.218637
78	ABHD17A	-0.0356229	0.435621
79	ABHD17B	-0.022138	0.559599
80	ABHD17C	0.234479	0.584591
81	ABHD18	0.0976862	0.290632
82	ABHD2	0.0243738	1.0496
83	ABHD3	0.0700374	0.469861
84	ABHD4	0.0658783	0.450045
85	ABHD5	0.0576703	0.278119
86	ABHD6	0.516672	0.312818
87	ABHD8	0.0148133	0.47933
88	ABI1	-0.0867467	0.496041
89	ABI2	-0.15173	0.3333
90	ABI3	0.199149	0.607927
91	ABI3BP	0.371523	0.561457
92	ABITRAM	0.218	0.342745
93	ABL1	0.0978498	0.440108
94	ABL2	0.177346	0.278356
95	ABLIM1	0.278207	0.786312
96	ABLIM2	-0.021294	0.328909
97	ABLIM3	-0.0232836	0.575782
98	ABO	0.535676	0.684289
99	ABR	0.293524	0.409243
100	ABRACL	0.132464	0.727735
101	ABRAXAS1	0.133013	0.243992
102	ABRAXAS2	-0.123779	0.352228
103	ABT1	0.0909238	0.341518
104	ABTB1	-0.0509228	0.593177
105	ABTB2	0.0162786	0.617886
106	ACAA1	0.353468	0.42231
107	ACAA2	0.489691	0.531188
108	ACACA	0.366714	0.623259
109	ACACB	0.522908	0.484348
110	ACAD10	0.304047	0.364939
111	ACAD11	0.0919073	0.0984163
112	ACAD8	0.192979	0.912215
113	ACAD9	0.17008	0.376171
114	ACADL	0.402464	0.914041
115	ACADM	-0.120779	0.552509
116	ACADS	0.0812915	0.650319
117	ACADSB	-0.0853204	0.725876
118	ACADVL	-0.0542946	0.54223
119	ACAN	0.0638384	0.390775
120	ACAP1	0.246879	0.531249
121	ACAP2	0.0200584	0.475947
122	ACAP3	0.0473315	0.546971
123	ACAT1	0.247037	0.548568
124	ACAT2	0.186007	0.619882
125	ACBD3	-0.274247	0.553338
126	ACBD4	-0.128157	0.509867
127	ACBD5	-0.0110167	0.463266
128	ACBD6	0.229379	0.346375
129	ACBD7	0.294527	0.319405
130	ACCS	-0.339288	0.704831
131	ACD	-0.191163	0.476536
132	ACE	0.320072	0.537656
133	ACE2	0.134512	0.0886283
134	ACER2	-0.0237049	0.800885
135	ACER3	0.0590462	0.755581
136	ACHE	0.199928	0.749637
137	ACIN1	-0.0410709	0.447328
138	ACKR1	0.142021	1.20738
139	ACKR2	0.0941387	0.309202
140	ACKR3	0.510141	0.66371
141	ACKR4	0.107852	0.0726803
142	ACLY	0.133094	0.672358
143	ACMSD	0.111654	0.0580587
144	ACO1	0.268279	0.391768
145	ACO2	-0.130353	0.481788
146	ACOT1	0.191758	0.533893
147	ACOT11	0.527848	0.322262
148	ACOT13	0.212328	0.317187
149	ACOT2	0.25865	0.450172
150	ACOT4	-0.0245952	0.382266
151	ACOT7	-0.0731125	0.382428
152	ACOT8	0.411879	0.324963
153	ACOT9	0.170924	0.398424
154	ACOX1	0.0629884	0.398378
155	ACOX2	0.392067	0.637825
156	ACOX3	0.253954	0.502031
157	ACOXL	0.186062	0.389454
158	ACP1	0.222938	0.341416
159	ACP2	0.560744	0.486246
160	ACP3	0.484925	1.33879
161	ACP4	0.0930117	0.308263
162	ACP5	0.318	1.12261
163	ACP6	0.230469	0.368787
164	ACP7	0.274014	0.115261
165	ACR	0.111632	0.0966057
166	ACRBP	0.19132	0.324959
167	ACRV1	0.470044	0.277233
168	ACSBG1	0.223176	0.230228
169	ACSBG2	0.0264008	0.0546199
170	ACSF2	0.488378	0.748701
171	ACSF3	-0.248689	0.341988
172	ACSL1	-0.0560626	0.758229
173	ACSL3	0.169958	0.77206
174	ACSL4	0.586634	0.534489
175	ACSL5	0.113319	1.18141
176	ACSL6	0.257343	0.0683286
177	ACSM1	0.319045	1.72853
178	ACSM3	0.155403	0.894839
179	ACSM4	-0.207723	0.0415338
180	ACSM5	0.0966434	0.115421
181	ACSS1	0.364309	0.468849
182	ACSS2	0.42111	0.315379
183	ACSS3	0.581002	0.314966
184	ACTA1	0.449427	1.41418
185	ACTA2	0.615521	1.05843
186	ACTB	0.259632	0.565187
187	ACTC1	0.56298	1.19364
188	ACTG1	0.173258	0.603888
189	ACTG2	0.624513	1.30359
190	ACTL6A	-0.0651763	0.504918
191	ACTN1	0.548575	0.661602
192	ACTN2	0.245001	0.860455
193	ACTN3	0.165545	0.064005
194	ACTN4	0.325937	0.485704
195	ACTR10	-0.0014856	0.278991
196	ACTR1A	-0.00672775	0.388919
197	ACTR1B	0.0815443	0.378311
198	ACTR2	0.00296553	0.487785
199	ACTR3	0.268605	0.425968
200	ACTR3B	0.388706	0.243011
201	ACTR3C	0.261978	0.176201
202	ACTR5	0.125719	0.279117
203	ACTR6	-0.101577	0.326666
204	ACTR8	0.083085	0.370657
205	ACTRT3	0.197105	0.252695
206	ACVR1	0.212283	0.475467
207	ACVR1B	0.211993	0.477512
208	ACVR1C	0.16571	0.0820951
209	ACVR2A	0.0161771	0.398901
210	ACVR2B	0.101832	0.30569
211	ACVRL1	0.244131	0.526485
212	ACY1	0.432465	0.129987
213	ACY3	0.083977	0.807017
214	ACYP1	-0.044552	0.495374
215	ACYP2	0.106568	0.28901
216	ADA	0.372575	0.367817
217	ADA2	0.408816	0.648226
218	ADAD2	0.105512	0.132581
219	ADAM10	0.0219719	0.58841
220	ADAM11	-0.00766276	0.298528
221	ADAM12	0.314537	0.225201
222	ADAM15	0.274828	0.441722
223	ADAM17	0.0512923	0.332208
224	ADAM19	0.57483	0.473596
225	ADAM20	0.0452676	0.0558
226	ADAM21	0.31675	0.31063
227	ADAM22	0.413634	0.546116
228	ADAM23	0.33435	0.248032
229	ADAM28	0.394505	0.466388
230	ADAM32	0.0272521	0.234198
231	ADAM33	0.528683	0.71118
232	ADAM8	0.0860765	0.642015
233	ADAM9	-0.179293	0.860078
234	ADAMDEC1	0.150996	0.639463
235	ADAMTS1	0.578372	1.06591
236	ADAMTS10	0.380679	0.4738
237	ADAMTS12	0.147877	0.243451
238	ADAMTS13	0.238597	0.426623
239	ADAMTS14	0.119398	0.159134
240	ADAMTS15	0.345689	0.302736
241	ADAMTS16	0.0859773	0.149902
242	ADAMTS17	-0.0297869	0.200458
243	ADAMTS18	0.052796	0.0985741
244	ADAMTS2	0.305843	0.620914
245	ADAMTS3	-0.086989	0.423306
246	ADAMTS4	0.325197	0.914151
247	ADAMTS5	0.528289	0.369004
248	ADAMTS6	0.118789	0.272511
249	ADAMTS7	0.205639	0.195539
250	ADAMTS8	0.518819	0.503491
251	ADAMTS9	0.433747	0.502658
252	ADAMTSL1	0.120352	1.05878
253	ADAMTSL2	0.338062	0.538489
254	ADAMTSL3	0.315274	0.63889
255	ADAMTSL4	0.423652	0.405328
256	ADAMTSL5	0.122851	0.320195
257	ADAP1	-0.0310129	0.36998
258	ADAP2	0.254453	0.369881
259	ADAR	0.0332457	0.50587
260	ADARB1	0.164916	0.442678
261	ADARB2	0.375868	0.558522
262	ADAT1	0.00994727	0.444677
263	ADAT2	0.160315	0.414635
264	ADAT3	0.0951092	0.379675
265	ADCK1	0.196093	0.316581
266	ADCK2	0.198872	0.343242
267	ADCK5	0.115449	0.568614
268	ADCY1	0.0390075	0.693389
269	ADCY10	0.194957	0.137967
270	ADCY2	0.426173	0.490716
271	ADCY3	0.499658	0.569832
272	ADCY4	0.212164	0.443033
273	ADCY5	0.551727	0.640715
274	ADCY6	0.278865	0.637145
275	ADCY7	0.209417	0.346087
276	ADCY9	0.304337	0.386169
277	ADCYAP1	0.237402	0.282287
278	ADCYAP1R1	0.562249	0.208055
279	ADD1	0.154498	0.353084
280	ADD2	0.310106	0.436607
281	ADD3	0.244781	0.828093
282	ADGRA2	0.559135	0.903312
283	ADGRA3	-0.16438	0.423762
284	ADGRB1	0.00047971	0.401915
285	ADGRB2	0.148959	0.35588
286	ADGRB3	0.411076	0.168221
287	ADGRD1	0.255953	0.382039
288	ADGRE1	0.117706	0.134016
289	ADGRE2	0.260314	0.287324
290	ADGRE3	0.212249	0.153181
291	ADGRE5	0.0509961	0.741944
292	ADGRF1	0.117763	1.18634
293	ADGRF3	-0.0982467	0.104309
294	ADGRF5	0.157751	1.37143
295	ADGRG1	0.0212378	0.58121
296	ADGRG2	0.374223	0.444352
297	ADGRG3	0.0878595	0.156907
298	ADGRG5	0.287453	0.263203
299	ADGRG6	0.441204	0.62252
300	ADGRL1	0.0155747	0.594122
301	ADGRL2	0.350493	0.62079
302	ADGRL3	0.502414	0.170197
303	ADGRL4	0.286476	0.539549
304	ADGRV1	0.0564633	0.297008
305	ADH1B	0.298571	0.420125
306	ADH1C	0.128053	0.803633
307	ADH5	0.495935	0.499522
308	ADH6	-0.176856	0.248219
309	ADHFE1	0.246413	0.548887
310	ADI1	0.303063	0.407585
311	ADIPOR1	0.211071	0.378016
312	ADIPOR2	-0.0559603	0.411946
313	ADK	-0.0639915	0.37562
314	ADM	0.12271	1.10913
315	ADM2	0.441223	0.655289
316	ADM5	-0.0225074	0.344774
317	ADNP	0.0180317	0.484953
318	ADNP2	-0.140813	0.459319
319	ADO	-0.0315405	0.314041
320	ADORA1	0.361939	0.152721
321	ADORA2A	0.0177651	0.0745537
322	ADORA2B	0.364316	0.436613
323	ADORA3	0.283734	0.351158
324	ADPGK	0.172474	0.57903
325	ADPRH	0.119083	0.549671
326	ADPRHL1	-0.0367003	0.492677
327	ADPRM	0.171322	0.611773
328	ADPRS	0.0648169	0.367098
329	ADRA1A	0.51405	0.389668
330	ADRA1B	0.23472	0.108598
331	ADRA1D	0.396903	0.549258
332	ADRA2A	0.295079	0.919007
333	ADRA2B	0.194676	0.210611
334	ADRA2C	0.255715	0.851849
335	ADRB1	0.371909	0.710941
336	ADRB2	0.114868	0.720017
337	ADRM1	0.277885	0.436062
338	ADSL	0.503424	0.141298
339	ADSS1	0.0650955	0.387549
340	ADSS2	0.00795988	0.508202
341	ADTRP	0.0884892	0.363515
342	AEBP1	0.377406	0.961159
343	AEBP2	0.245212	0.433448
344	AEN	0.054412	0.492661
345	AFAP1	0.0267382	0.283317
346	AFAP1L1	0.430801	0.326586
347	AFAP1L2	0.450888	0.66438
348	AFDN	-0.0248635	0.65289
349	AFF1	-0.0312319	0.554625
350	AFF2	0.41032	0.13755
351	AFF3	0.305296	1.00858
352	AFF4	0.0527646	0.582169
353	AFG1L	0.0159675	0.196262
354	AFG3L2	-0.0500234	0.466275
355	AFMID	0.445817	0.523605
356	AFTPH	-0.110454	0.452762
357	AGA	0.317567	0.475778
358	AGAP1	0.276809	0.425391
359	AGAP2	0.0639864	0.258952
360	AGAP3	0.166355	0.376822
361	AGAP4	0.0406431	0.335383
362	AGAP5	0.00392453	0.0828332
363	AGAP6	0.18611	0.157567
364	AGAP9	-0.23366	0.537333
365	AGBL2	0.148061	0.21282
366	AGBL3	0.0632522	0.200447
367	AGBL4	0.346843	0.119611
368	AGBL5	0.186677	0.327562
369	AGER	-0.0955514	0.700671
370	AGFG1	0.105524	0.37071
371	AGFG2	0.191465	0.546327
372	AGGF1	0.0255144	0.305873
373	AGK	0.322038	0.268295
374	AGL	0.0578053	0.490882
375	AGMAT	0.380328	0.530425
376	AGMO	0.119971	0.250194
377	AGO1	-0.0104027	0.305574
378	AGO2	0.263424	0.462039
379	AGO3	0.0161292	0.302724
380	AGO4	0.174508	0.450449
381	AGPAT1	0.28524	0.338096
382	AGPAT2	0.0374345	0.602583
383	AGPAT3	0.376609	0.335449
384	AGPAT4	0.506506	0.216331
385	AGPAT5	0.0259394	0.529151
386	AGPS	0.22503	0.4497
387	AGR2	0.0721245	1.56314
388	AGRN	0.225413	0.72771
389	AGRP	0.134275	0.118901
390	AGT	0.0610795	1.53212
391	AGTPBP1	0.0697343	0.43999
392	AGTR1	0.282183	1.30793
393	AGTRAP	0.366144	0.547088
394	AHCTF1	0.212232	0.36475
395	AHCY	0.428793	0.440998
396	AHCYL1	-0.131288	0.407804
397	AHCYL2	0.098338	0.468851
398	AHDC1	0.375052	0.46537
399	AHI1	0.0115866	0.344591
400	AHNAK	0.402085	0.737783
401	AHNAK2	0.601819	0.537195
402	AHR	0.392491	0.697053
403	AHRR	0.27428	0.078859
404	AHSA1	0.289889	0.34967
405	AIDA	0.218065	0.674243
406	AIF1	0.279288	0.837827
407	AIF1L	0.481803	0.43124
408	AIFM1	0.577473	0.275328
409	AIFM2	0.355015	0.428091
410	AIFM3	0.150695	0.185015
411	AIG1	0.457963	0.245524
412	AIM2	0.429226	0.324153
413	AIMP1	0.0355741	0.29804
414	AIMP2	0.535005	0.376753
415	AIP	-0.0543639	0.505699
416	AIRE	0.0565589	0.0629065
417	AJAP1	0.426883	0.209607
418	AJM1	0.330111	0.520308
419	AJUBA	0.426088	0.606341
420	AK1	0.023457	0.326578
421	AK2	0.353047	0.285196
422	AK3	0.0221361	0.387965
423	AK4	0.158191	0.575402
424	AK5	0.301805	0.925482
425	AK6	0.0852819	0.387717
426	AK7	0.0756833	0.282891
427	AK8	0.23736	0.283575
428	AK9	-0.0929556	0.261702
429	AKAP1	0.0187991	0.475921
430	AKAP10	0.0320439	0.401468
431	AKAP11	0.115629	0.574674
432	AKAP12	0.605556	0.694766
433	AKAP13	0.132857	0.58999
434	AKAP17A	0.0757806	0.549376
435	AKAP3	0.277372	0.291694
436	AKAP5	0.273026	0.287076
437	AKAP6	0.43402	0.197077
438	AKAP7	0.467628	0.560628
439	AKAP8	-0.0391926	0.451095
440	AKAP8L	0.186415	0.49046
441	AKAP9	-0.0981649	0.612874
442	AKIP1	0.240346	0.267446
443	AKIRIN1	0.228587	0.55404
444	AKIRIN2	0.207806	0.423935
445	AKNA	0.309062	0.527767
446	AKR1A1	0.497926	0.389592
447	AKR1B1	0.312903	0.68642
448	AKR1B10	-0.0291741	0.208748
449	AKR1B15	0.056318	0.064341
450	AKR1C1	0.272841	0.465411
451	AKR1C2	0.226917	0.344502
452	AKR1C3	0.148656	0.709281
453	AKR1E2	0.0124046	0.374487
454	AKR7A2	0.232029	0.423401
455	AKR7A3	0.231689	0.466476
456	AKT1	0.181168	0.473566
457	AKT1S1	0.423238	0.328302
458	AKT2	0.163596	0.327503
459	AKT3	0.040529	0.535921
460	AKTIP	-0.0172965	0.313715
461	ALAD	0.466113	0.572055
462	ALAS1	0.104129	0.459672
463	ALAS2	0.0165845	0.0946256
464	ALB	0.18403	1.02538
465	ALCAM	0.0725754	0.660183
466	ALDH16A1	-0.172314	0.557928
467	ALDH18A1	0.319604	0.452336
468	ALDH1A1	0.0822359	1.37403
469	ALDH1A2	0.677736	0.672061
470	ALDH1A3	0.330116	0.783011
471	ALDH1B1	0.364504	0.558062
472	ALDH1L1	0.0708435	0.76123
473	ALDH1L2	0.517132	0.279314
474	ALDH2	0.416494	0.830001
475	ALDH3A1	0.250976	0.313152
476	ALDH3A2	0.398184	0.580054
477	ALDH3B1	0.33054	0.40778
478	ALDH4A1	0.327584	0.642116
479	ALDH5A1	0.0649837	0.401267
480	ALDH6A1	0.218271	0.607819
481	ALDH7A1	0.156572	0.509069
482	ALDH8A1	-0.0945948	0.190049
483	ALDH9A1	0.0971709	0.553978
484	ALDOA	0.123484	0.496304
485	ALDOB	0.0200119	0.104748
486	ALDOC	0.231045	0.596564
487	ALG1	0.375991	0.30139
488	ALG10	-0.0582716	0.279612
489	ALG10B	-0.159833	0.34862
490	ALG11	-0.0960205	0.296903
491	ALG12	0.0313105	0.341329
492	ALG13	0.368538	0.311257
493	ALG14	0.338482	0.22166
494	ALG1L2	0.0621134	0.139579
495	ALG2	0.166664	0.430748
496	ALG3	0.480085	0.353238
497	ALG5	0.359156	0.459231
498	ALG6	0.441326	0.32014
499	ALG8	0.333544	0.331979
500	ALG9	-0.00406887	0.199883
501	ALK	0.156564	0.0399422
502	ALKAL2	0.251892	0.272669
503	ALKBH1	-0.11334	0.239193
504	ALKBH2	0.36208	0.477226
505	ALKBH3	0.211018	0.368308
506	ALKBH4	0.0417947	0.339574
507	ALKBH5	0.0895327	0.405915
508	ALKBH6	-0.20972	0.236006
509	ALKBH7	0.197796	0.68557
510	ALKBH8	0.00810169	0.29781
511	ALMS1	-0.0331881	0.393544
512	ALOX12	0.106553	0.128774
513	ALOX15	0.191448	1.08796
514	ALOX15B	0.385603	2.37758
515	ALOX5	-0.0398523	0.743192
516	ALOX5AP	0.195317	0.755697
517	ALPK1	0.337724	0.436829
518	ALPK2	0.128785	0.0946437
519	ALPK3	-0.0354119	0.444905
520	ALPL	0.147005	0.874235
521	ALS2	0.0565867	0.310286
522	ALS2CL	0.258487	0.608405
523	ALX4	0.404871	0.350998
524	ALYREF	0.310417	0.385176
525	AMACR	0.3428	1.2535
526	AMBP	0.139648	0.314979
527	AMBRA1	0.0545086	0.357007
528	AMD1	0.134304	0.912349
529	AMDHD1	-0.0819219	0.123312
530	AMDHD2	-0.0149593	0.450046
531	AMER1	0.135709	0.29618
532	AMFR	0.19739	0.37507
533	AMH	0.269495	0.666622
534	AMHR2	0.125948	0.12465
535	AMIGO1	0.0332662	0.395074
536	AMIGO2	0.364145	0.689726
537	AMMECR1	0.110478	0.478735
538	AMMECR1L	0.159067	0.369714
539	AMN	0.0713357	0.274048
540	AMN1	-0.130113	0.306844
541	AMOT	0.425532	0.691634
542	AMOTL1	-0.15861	0.812495
543	AMOTL2	0.427253	0.735872
544	AMPD2	0.273416	0.349405
545	AMPD3	0.0576127	0.811365
546	AMPH	0.373361	0.197381
547	AMT	-0.0749638	0.0760118
548	AMY2B	0.25894	0.47977
549	AMZ1	-0.0612303	0.0789127
550	AMZ2	0.0344283	0.266142
551	ANAPC1	-0.0286388	0.35581
552	ANAPC10	0.119426	0.168979
553	ANAPC11	0.357278	0.477192
554	ANAPC13	0.190735	0.359324
555	ANAPC15	0.0965136	0.307242
556	ANAPC16	0.22796	0.438822
557	ANAPC2	0.0478931	0.417744
558	ANAPC4	0.0957581	0.43561
559	ANAPC5	0.496415	0.380131
560	ANAPC7	0.159512	0.352677
561	ANG	0.441544	0.896413
562	ANGEL1	0.197981	0.364796
563	ANGEL2	-0.241781	0.387949
564	ANGPT1	0.603806	0.589412
565	ANGPT2	0.263539	0.516002
566	ANGPT4	0.00997031	0.101306
567	ANGPTL1	0.513646	0.52835
568	ANGPTL2	0.459501	0.761301
569	ANGPTL3	0.422214	0.653483
570	ANGPTL4	0.221359	1.1536
571	ANGPTL6	-0.0210876	0.0949183
572	ANGPTL8	-0.115908	0.130465
573	ANK1	0.167346	0.436441
574	ANK2	0.586898	0.284062
575	ANK3	0.25581	0.622837
576	ANKAR	-0.0429437	0.21198
577	ANKDD1A	0.451615	0.396835
578	ANKDD1B	0.468399	0.295578
579	ANKEF1	0.251093	0.319077
580	ANKFN1	-0.10927	0.10507
581	ANKFY1	0.226222	0.479791
582	ANKH	0.107615	0.717809
583	ANKHD1	-0.0768759	0.144395
584	ANKIB1	-0.102914	0.533153
585	ANKK1	-0.0181142	0.398095
586	ANKLE1	0.108945	0.156478
587	ANKLE2	0.0785076	0.267917
588	ANKMY1	0.1769	0.310289
589	ANKMY2	0.212539	0.3528
590	ANKRA2	0.0108071	0.522522
591	ANKRD1	0.09997	0.844312
592	ANKRD10	0.224391	0.647888
593	ANKRD11	-0.0814464	0.502788
594	ANKRD12	0.0831408	0.409297
595	ANKRD13A	0.333058	0.39813
596	ANKRD13B	0.493234	0.459781
597	ANKRD13C	0.0237127	0.344833
598	ANKRD13D	-0.0158755	0.541174
599	ANKRD16	0.383401	0.336627
600	ANKRD17	0.000210274	0.540488
601	ANKRD18A	0.184061	0.262418
602	ANKRD18B	-0.0168653	0.333515
603	ANKRD2	0.107074	0.366345
604	ANKRD22	-0.0441024	0.739047
605	ANKRD23	0.0304973	0.294015
606	ANKRD24	0.0623137	0.483858
607	ANKRD26	-0.0724084	0.257571
608	ANKRD27	0.163112	0.371094
609	ANKRD28	0.148232	0.373469
610	ANKRD29	0.183694	0.816381
611	ANKRD31	-0.0163699	0.0681512
612	ANKRD33B	0.581806	0.252995
613	ANKRD34A	-0.0287261	0.352351
614	ANKRD35	0.506751	0.569168
615	ANKRD36	0.0722377	0.248616
616	ANKRD36B	-0.0869218	0.213043
617	ANKRD36C	0.150262	0.170047
618	ANKRD37	0.281505	0.865348
619	ANKRD39	0.094615	0.228995
620	ANKRD40	0.253621	0.410748
621	ANKRD42	0.1725	0.251147
622	ANKRD44	0.306515	0.325996
623	ANKRD45	0.00404176	0.088412
624	ANKRD46	0.0237416	0.377591
625	ANKRD49	-0.00750377	0.40164
626	ANKRD50	0.121724	0.676131
627	ANKRD52	0.347298	0.436075
628	ANKRD53	0.222051	0.252671
629	ANKRD54	0.175802	0.333889
630	ANKRD55	-0.089698	0.090875
631	ANKRD6	0.0113708	0.406102
632	ANKRD61	-0.127231	0.269817
633	ANKRD65	0.280909	0.731385
634	ANKRD9	-0.114705	0.490297
635	ANKS1A	0.208225	0.373103
636	ANKS1B	0.172138	0.171387
637	ANKS3	0.325387	0.48604
638	ANKS6	0.297484	0.438193
639	ANKZF1	0.53461	0.542182
640	ANLN	0.397311	0.515376
641	ANO1	0.46726	0.66144
642	ANO10	-0.087643	0.279611
643	ANO2	0.145398	0.157064
644	ANO3	0.0158475	0.183028
645	ANO4	0.652873	0.458486
646	ANO5	0.435113	0.481041
647	ANO6	0.523893	0.63651
648	ANO7	0.506409	1.24097
649	ANO8	0.125308	0.47462
650	ANO9	0.117428	0.699355
651	ANOS1	0.104902	0.642367
652	ANP32A	0.147585	0.324876
653	ANP32B	0.11889	0.433905
654	ANP32E	0.621844	0.518162
655	ANPEP	0.399421	2.35013
656	ANTKMT	0.25489	0.577086
657	ANTXR1	0.528286	0.791446
658	ANTXR2	0.397262	0.764315
659	ANXA1	0.470194	0.99426
660	ANXA10	0.0960545	0.197367
661	ANXA11	0.318429	0.453588
662	ANXA13	0.0323407	0.21611
663	ANXA2	0.522238	0.775
664	ANXA2R	-0.00480185	0.647426
665	ANXA3	0.305918	0.741077
666	ANXA4	0.341232	0.412092
667	ANXA5	-0.0416842	0.587954
668	ANXA6	0.496326	0.759862
669	ANXA7	-0.0713407	0.435699
670	ANXA8	0.228534	0.399508
671	ANXA9	-0.218073	0.649378
672	AOAH	0.20838	0.58653
673	AOC1	0.402855	1.61206
674	AOC2	-0.104371	0.346291
675	AOC3	0.589789	0.823888
676	AOPEP	0.46755	0.528645
677	AOX1	0.658811	0.806509
678	AP1AR	0.0398946	0.415645
679	AP1B1	0.221796	0.471793
680	AP1G1	0.114947	0.536621
681	AP1G2	0.321696	0.497397
682	AP1M1	0.0352068	0.230584
683	AP1M2	0.508583	0.378489
684	AP1S1	0.288861	0.41196
685	AP1S2	0.173703	0.416396
686	AP1S3	0.17502	0.398022
687	AP2A1	0.171802	0.36689
688	AP2A2	0.0253257	0.324776
689	AP2B1	0.215295	0.454576
690	AP2M1	0.141874	0.389451
691	AP2S1	0.259647	0.681628
692	AP3B1	0.194067	0.422551
693	AP3B2	-0.0420278	0.23948
694	AP3D1	0.428752	0.347248
695	AP3M1	-0.0630045	0.521532
696	AP3M2	0.166997	0.390629
697	AP3S1	-0.284281	0.358663
698	AP3S2	0.157163	0.274047
699	AP4B1	-0.016988	0.331366
700	AP4E1	0.081225	0.307711
701	AP4M1	0.398084	0.353422
702	AP4S1	0.490952	0.156907
703	AP5B1	0.321013	0.398564
704	AP5M1	-0.0844342	0.320303
705	AP5S1	0.0794253	0.266033
706	AP5Z1	-0.0421977	0.406983
707	APAF1	-0.0500402	0.484223
708	APBA1	-0.0433517	0.339732
709	APBA2	0.528602	0.518093
710	APBA3	-0.0848629	0.336617
711	APBB1	0.397143	0.607972
712	APBB1IP	0.241772	0.570017
713	APBB2	0.178063	0.326625
714	APBB3	-0.0972064	0.51212
715	APC	0.105216	0.49036
716	APC2	0.259962	0.147598
717	APCDD1	0.185653	0.78334
718	APCDD1L	0.330129	0.119992
719	APEH	0.423896	0.368124
720	APEX1	0.518166	0.466533
721	APEX2	0.114259	0.296453
722	APH1A	0.0549613	0.291479
723	APH1B	-0.0495752	0.472453
724	API5	0.00194431	0.357409
725	APIP	-0.158158	0.369769
726	APLF	0.494488	0.209162
727	APLN	0.484213	0.681004
728	APLNR	0.0697451	0.635525
729	APLP1	-0.160947	0.558424
730	APLP2	0.245263	0.53003
731	APMAP	0.42886	0.432922
732	APOA1	0.050894	0.296041
733	APOB	0.00394959	0.110009
734	APOBEC2	0.0494739	0.352675
735	APOBEC3A	0.0711797	0.211189
736	APOBEC3B	0.0914602	0.319177
737	APOBEC3C	0.525932	0.924475
738	APOBEC3D	0.352987	0.106485
739	APOBEC3F	0.245727	0.547437
740	APOBEC3G	0.388842	0.597334
741	APOBEC3H	0.141583	0.296542
742	APOBR	0.0131217	0.5597
743	APOC1	0.0582226	1.13754
744	APOD	-0.0182049	1.33986
745	APOE	0.0260581	1.25115
746	APOF	0.382555	1.00649
747	APOL1	0.463861	0.929519
748	APOL2	0.106237	0.511654
749	APOL3	0.214997	0.725587
750	APOL4	0.0446662	1.35789
751	APOL6	0.340619	0.744018
752	APOLD1	0.247479	0.786115
753	APOM	0.0825786	0.34948
754	APOO	0.117958	0.367851
755	APOOL	-0.0124409	0.530059
756	APP	-0.0950709	0.852257
757	APPBP2	-0.0904366	0.447412
758	APPL1	-0.100057	0.467062
759	APPL2	-0.00964177	0.552396
760	APRT	0.324828	0.678223
761	APTR	0.184529	0.32356
762	APTX	0.442334	0.183301
763	AQP1	0.255238	0.812676
764	AQP11	0.0641574	0.778988
765	AQP3	0.332223	1.03432
766	AQP5	0.417447	0.349397
767	AQP6	-0.157585	0.132169
768	AQP7	0.208067	0.150197
769	AQP8	0.0840804	0.206821
770	AQP9	0.121	0.315381
771	AQR	-0.263111	0.422815
772	AR	-0.00157081	0.620934
773	ARAF	0.137522	0.442904
774	ARAP1	0.112122	0.511993
775	ARAP2	0.031493	0.383553
776	ARAP3	0.176202	0.51255
777	ARC	0.114487	0.487263
778	ARCN1	-0.00863473	0.486196
779	AREG	0.128894	1.01488
780	AREL1	0.217964	0.341748
781	ARF1	0.264835	0.402293
782	ARF3	0.28868	0.342568
783	ARF4	0.185012	0.431217
784	ARF5	0.303081	0.418615
785	ARF6	0.127508	0.502562
786	ARFGAP1	-0.0239063	0.563261
787	ARFGAP2	0.156938	0.382271
788	ARFGAP3	0.286032	0.489079
789	ARFGEF1	0.254073	0.370245
790	ARFGEF2	0.0417959	0.608721
791	ARFGEF3	0.186674	0.860864
792	ARFIP1	-0.0692356	0.447965
793	ARFIP2	0.556623	0.450107
794	ARFRP1	-0.209182	0.485206
795	ARG1	-0.258531	0.26558
796	ARG2	0.32681	1.17218
797	ARGLU1	0.068285	0.857052
798	ARHGAP1	0.325034	0.422213
799	ARHGAP10	0.43288	0.458993
800	ARHGAP11A	0.346127	0.329984
801	ARHGAP11B	0.0468519	0.0918211
802	ARHGAP12	-0.182762	0.576787
803	ARHGAP15	0.299893	0.398752
804	ARHGAP17	0.260863	0.337025
805	ARHGAP18	0.0817198	0.597946
806	ARHGAP19	-0.114188	0.321358
807	ARHGAP20	0.54026	0.37994
808	ARHGAP21	-0.0151862	0.456246
809	ARHGAP22	0.220816	0.277124
810	ARHGAP23	0.600667	0.654802
811	ARHGAP24	0.396033	0.260218
812	ARHGAP25	0.361163	0.472795
813	ARHGAP26	-0.0396941	0.47877
814	ARHGAP27	0.122708	0.515145
815	ARHGAP28	0.112276	0.687913
816	ARHGAP29	-0.0987824	0.618632
817	ARHGAP30	0.258252	0.693752
818	ARHGAP31	0.399492	0.437532
819	ARHGAP32	0.157253	0.577439
820	ARHGAP33	0.180105	0.561385
821	ARHGAP35	0.101398	0.462981
822	ARHGAP39	0.459062	0.431341
823	ARHGAP4	0.207088	0.726823
824	ARHGAP40	0.257918	0.618223
825	ARHGAP42	-0.0133627	0.395612
826	ARHGAP44	0.0796906	0.33805
827	ARHGAP45	0.224285	0.608267
828	ARHGAP5	0.0853954	0.677678
829	ARHGAP6	-0.0894092	0.602513
830	ARHGAP8	-0.0677418	0.311769
831	ARHGAP9	0.331914	0.53724
832	ARHGDIA	0.434609	0.411215
833	ARHGDIB	0.161926	0.974583
834	ARHGDIG	0.439827	0.746618
835	ARHGEF1	-0.0859216	0.569344
836	ARHGEF10	-0.0734797	0.109941
837	ARHGEF10L	0.174717	0.418706
838	ARHGEF11	0.265238	0.466865
839	ARHGEF12	0.0184685	0.518342
840	ARHGEF15	0.280881	0.449776
841	ARHGEF16	0.435226	0.410479
842	ARHGEF17	0.349657	0.569371
843	ARHGEF18	-0.0486251	0.256229
844	ARHGEF19	0.11274	0.679591
845	ARHGEF2	0.399214	0.549155
846	ARHGEF25	0.565751	0.520227
847	ARHGEF26	0.428753	0.678135
848	ARHGEF28	0.527437	0.382305
849	ARHGEF3	0.0746407	0.606205
850	ARHGEF33	0.188198	0.120803
851	ARHGEF35	-0.227472	0.548754
852	ARHGEF37	0.126672	0.63749
853	ARHGEF38	0.288218	0.643928
854	ARHGEF39	0.303777	0.210983
855	ARHGEF4	-0.00353698	0.405891
856	ARHGEF40	0.452685	0.508463
857	ARHGEF5	0.196664	0.307963
858	ARHGEF6	0.319915	0.528689
859	ARHGEF7	0.136979	0.462204
860	ARHGEF9	0.228573	0.26875
861	ARID1A	0.0436145	0.489271
862	ARID1B	-0.0134444	0.364331
863	ARID2	0.0410207	0.387908
864	ARID3A	0.00575219	0.413722
865	ARID3B	0.111345	0.309587
866	ARID3C	-0.0968373	0.134632
867	ARID4A	-0.0590606	0.440743
868	ARID4B	0.0153715	0.389772
869	ARID5A	0.258127	0.937827
870	ARID5B	-0.0692634	0.624938
871	ARIH1	-0.0314212	0.303924
872	ARIH2	0.22994	0.385448
873	ARL1	0.00539412	0.411698
874	ARL10	0.333743	0.258404
875	ARL11	0.225619	0.194871
876	ARL13A	0.0701501	0.0939078
877	ARL13B	0.00925123	0.426111
878	ARL14EP	0.0216866	0.278395
879	ARL15	-0.101366	0.490943
880	ARL16	0.0303237	0.530799
881	ARL17A	-0.0108603	0.169234
882	ARL17B	-0.0666138	0.154719
883	ARL2	-0.0963751	0.645902
884	ARL2BP	0.225803	0.179729
885	ARL3	-0.137428	0.399813
886	ARL4A	0.384408	0.516477
887	ARL4C	0.60763	0.698881
888	ARL4D	0.546012	0.785581
889	ARL5A	-0.115421	0.434408
890	ARL5B	-0.0414666	0.606137
891	ARL6	-0.0270325	0.356381
892	ARL6IP1	0.192742	0.475063
893	ARL6IP4	-0.0934477	0.191796
894	ARL6IP5	0.0911159	0.496369
895	ARL6IP6	-0.023699	0.394273
896	ARL8A	0.159326	0.267792
897	ARL8B	0.175264	0.340114
898	ARL9	-0.174589	0.331021
899	ARMC1	-0.0317266	0.377358
900	ARMC10	0.0125614	0.274993
901	ARMC12	0.119306	0.42049
902	ARMC2	-0.0395592	0.210191
903	ARMC5	0.0166875	0.444954
904	ARMC6	0.453126	0.361644
905	ARMC7	-0.135327	0.411273
906	ARMC8	0.0556809	0.311398
907	ARMC9	-0.0381571	0.244485
908	ARMCX1	0.577023	0.910098
909	ARMCX2	0.300455	0.806494
910	ARMCX3	0.0781054	0.431973
911	ARMCX4	0.441146	0.426392
912	ARMCX5	0.136751	0.318114
913	ARMCX6	-0.0233821	0.392635
914	ARMH1	0.115003	0.411953
915	ARMH3	0.0846626	0.348842
916	ARMH4	0.452279	0.220421
917	ARMT1	-0.109227	0.436874
918	ARNT	0.229733	0.361027
919	ARNT2	0.0154798	0.533516
920	ARPC1A	0.0729072	0.498677
921	ARPC1B	0.224682	0.134585
922	ARPC2	0.348404	0.373073
923	ARPC3	0.399832	0.391422
924	ARPC4	-0.0801394	0.507154
925	ARPC5	0.238774	0.337617
926	ARPC5L	0.318261	0.364883
927	ARPIN	-0.130041	0.431005
928	ARPP19	0.164574	0.367913
929	ARR3	0.0573383	0.160836
930	ARRB1	0.378506	0.416229
931	ARRB2	0.0898429	0.459795
932	ARRDC1	-0.0743277	0.560553
933	ARRDC2	0.190726	0.709323
934	ARRDC3	0.315213	0.891373
935	ARRDC4	-0.0754484	0.560372
936	ARRDC5	0.239143	0.179963
937	ARSA	0.127476	0.595033
938	ARSB	0.247846	0.331491
939	ARSD	0.249284	0.513084
940	ARSG	0.344238	0.341855
941	ARSI	0.49413	0.256694
942	ARSJ	0.5561	0.494726
943	ARSK	0.243906	0.371311
944	ARSL	0.197963	0.2236
945	ART3	0.130342	0.309125
946	ART4	0.0973903	0.507601
947	ART5	0.161381	0.336308
948	ARTN	-0.190908	0.393896
949	ARV1	0.242717	0.314746
950	ARVCF	0.534772	0.472021
951	ASAH1	-0.092398	0.603848
952	ASAH2	0.07178	0.110372
953	ASAH2B	0.0684758	0.223813
954	ASAP1	0.318199	0.522822
955	ASAP2	0.0796539	0.594568
956	ASAP3	0.154033	0.585465
957	ASB1	0.249387	0.395865
958	ASB12	0.362143	0.160973
959	ASB13	0.138987	0.435459
960	ASB14	-0.165869	0.121483
961	ASB16	-0.0479437	0.272818
962	ASB2	0.572524	0.69424
963	ASB3	0.108907	0.380079
964	ASB4	-0.043998	0.0777589
965	ASB6	-0.221642	0.274039
966	ASB7	-0.101562	0.28548
967	ASB8	0.0739329	0.26638
968	ASB9	-0.0331869	0.70035
969	ASCC1	-0.0313431	0.35868
970	ASCC2	0.106798	0.282906
971	ASCC3	0.294113	0.501383
972	ASCL2	0.225909	0.80189
973	ASCL5	0.00636393	0.118693
974	ASF1A	-0.0664034	0.405531
975	ASF1B	0.517639	0.623898
976	ASGR1	0.157453	0.227489
977	ASGR2	0.276279	0.164687
978	ASH1L	0.197579	0.476473
979	ASH2L	-0.0160135	0.430613
980	ASIC1	0.215043	0.418933
981	ASIC2	0.36878	0.361366
982	ASIC3	0.184227	0.520572
983	ASIC4	0.209808	0.0792668
984	ASIP	-0.0305747	0.157159
985	ASL	0.359616	0.399021
986	ASMT	-0.109613	0.0685803
987	ASMTL	0.22538	0.357387
988	ASNS	0.155623	0.130132
989	ASNSD1	0.13374	0.257759
990	ASPA	0.507006	0.299196
991	ASPDH	0.0260489	0.157792
992	ASPG	-0.017973	0.147403
993	ASPH	0.187186	0.588297
994	ASPHD1	0.286181	0.574949
995	ASPHD2	0.0660413	0.387064
996	ASPM	0.470635	0.31823
997	ASPN	0.101678	0.969435
998	ASPRV1	0.0826789	0.255904
999	ASPSCR1	0.105415	0.452467
1000	ASRGL1	0.0802815	0.800106
1001	ASS1	-0.186449	1.05508
1002	ASTE1	-0.015401	0.265811
1003	ASTN1	0.191103	0.198263
1004	ASTN2	0.465982	0.678767
1005	ASXL1	0.0923684	0.441316
1006	ASXL2	0.00203609	0.48637
1007	ASXL3	0.494234	0.152186
1008	ATAD1	0.0679084	0.707483
1009	ATAD2	0.0834202	0.599658
1010	ATAD2B	0.158993	0.340711
1011	ATAD3A	0.380954	0.476645
1012	ATAD3B	0.228845	0.626685
1013	ATAD3C	0.212835	0.498128
1014	ATAD5	0.373354	0.202576
1015	ATAT1	0.469606	0.438691
1016	ATE1	0.0632404	0.44243
1017	ATF1	-0.0568088	0.464395
1018	ATF2	-0.060113	0.441549
1019	ATF3	0.392108	1.75639
1020	ATF4	0.259154	0.470623
1021	ATF5	0.331736	0.556524
1022	ATF6	0.161566	0.443578
1023	ATF6B	-0.101026	0.517346
1024	ATF7	0.205617	0.307561
1025	ATF7IP	0.201498	0.457138
1026	ATF7IP2	-0.00980424	0.507029
1027	ATG10	0.15873	0.231654
1028	ATG101	0.13145	0.447805
1029	ATG12	-0.0285925	0.285742
1030	ATG13	0.301663	0.335151
1031	ATG14	-0.117192	0.407031
1032	ATG16L1	-0.0736787	0.337202
1033	ATG16L2	-0.0248492	0.629131
1034	ATG2A	0.0698277	0.348475
1035	ATG2B	-0.158092	0.451163
1036	ATG3	0.0446082	0.3043
1037	ATG4A	0.239361	0.345158
1038	ATG4B	-0.258954	0.496409
1039	ATG4C	-0.120905	0.352559
1040	ATG4D	0.157506	0.384538
1041	ATG5	0.424521	0.403451
1042	ATG7	-0.264387	0.251647
1043	ATG9A	0.017263	0.58779
1044	ATG9B	0.295734	0.3241
1045	ATIC	0.409962	0.358346
1046	ATL1	-0.174681	0.448172
1047	ATL2	0.33047	0.507138
1048	ATL3	0.0884127	0.398711
1049	ATM	0.169794	0.470987
1050	ATMIN	0.157312	0.417785
1051	ATN1	0.210039	0.465725
1052	ATOH7	0.241678	0.135448
1053	ATOH8	0.145928	0.69676
1054	ATOX1	0.0323621	0.488191
1055	ATP10A	0.041285	0.333137
1056	ATP10B	0.0275868	0.0389104
1057	ATP10D	0.362972	0.50741
1058	ATP11A	0.182829	0.971075
1059	ATP11B	-0.167914	0.765418
1060	ATP11C	0.237532	0.419677
1061	ATP13A1	0.494045	0.323776
1062	ATP13A2	0.424027	0.391432
1063	ATP13A3	-0.127529	0.607816
1064	ATP13A4	-0.0675025	0.108855
1065	ATP1A1	0.0265544	0.988271
1066	ATP1A2	0.600951	0.902137
1067	ATP1A3	0.119241	0.0296571
1068	ATP1A4	0.302273	0.11823
1069	ATP1B1	0.376233	0.877352
1070	ATP1B2	0.33617	0.465037
1071	ATP1B3	-0.10802	0.4864
1072	ATP23	-0.0274637	0.234136
1073	ATP2A1	-0.0802361	0.489607
1074	ATP2A2	0.299783	0.587094
1075	ATP2A3	0.287833	0.860171
1076	ATP2B1	0.00557699	0.523487
1077	ATP2B2	0.124305	0.0486291
1078	ATP2B4	0.628799	0.799699
1079	ATP2C1	0.122252	0.595768
1080	ATP2C2	0.24991	0.75619
1081	ATP5F1A	0.0763666	0.469625
1082	ATP5F1B	0.227167	0.549211
1083	ATP5F1C	0.150614	0.403632
1084	ATP5F1D	-0.0406661	0.774407
1085	ATP5F1E	0.141877	0.591541
1086	ATP5IF1	0.473193	0.424842
1087	ATP5MC1	0.268237	0.499585
1088	ATP5MC2	0.299503	0.44305
1089	ATP5MC3	0.0848162	0.369516
1090	ATP5ME	0.236029	0.725733
1091	ATP5MF	0.324947	0.531522
1092	ATP5MG	0.0798115	0.404346
1093	ATP5MGL	0.0830356	0.123396
1094	ATP5PB	0.0139565	0.420996
1095	ATP5PD	0.171483	0.41056
1096	ATP5PF	0.145994	0.40027
1097	ATP5PO	0.244406	0.586001
1098	ATP6AP1	0.503549	0.364047
1099	ATP6AP2	0.089947	0.352013
1100	ATP6V0A1	0.307571	0.370212
1101	ATP6V0A2	-0.131731	0.261657
1102	ATP6V0B	0.253573	0.483812
1103	ATP6V0C	-0.0929523	0.225559
1104	ATP6V0D1	0.0161498	0.456183
1105	ATP6V0D2	0.203473	0.267279
1106	ATP6V0E1	0.208305	0.432705
1107	ATP6V0E2	0.462768	0.572367
1108	ATP6V1A	-0.109994	0.567454
1109	ATP6V1B2	0.0144288	0.401079
1110	ATP6V1C1	0.0990773	0.372185
1111	ATP6V1C2	0.0885433	0.582966
1112	ATP6V1D	0.329231	0.321494
1113	ATP6V1E1	0.126047	0.398935
1114	ATP6V1E2	0.396014	0.287873
1115	ATP6V1F	0.186806	0.474872
1116	ATP6V1G1	0.381053	0.472174
1117	ATP6V1G2	0.245912	0.223707
1118	ATP6V1H	0.0649347	0.388481
1119	ATP7A	-0.117124	0.494564
1120	ATP7B	0.0071904	0.477922
1121	ATP8A1	0.0870925	0.715119
1122	ATP8A2	0.401646	0.967117
1123	ATP8B1	0.114247	0.636201
1124	ATP8B2	0.257489	0.770601
1125	ATP8B3	0.120269	0.108369
1126	ATP8B4	0.327679	0.65637
1127	ATP9A	0.0751711	0.547136
1128	ATP9B	-0.15583	0.321514
1129	ATPAF1	0.455738	0.266103
1130	ATPAF2	0.250501	0.253023
1131	ATPSCKMT	0.176361	0.308482
1132	ATR	0.132464	0.338557
1133	ATRAID	0.279794	0.34184
1134	ATRIP	0.167739	0.310722
1135	ATRN	-0.0986181	0.445617
1136	ATRNL1	0.522368	0.315073
1137	ATRX	-0.123785	0.472949
1138	ATXN1	0.0402516	0.495852
1139	ATXN10	-0.0324679	0.358897
1140	ATXN1L	0.263865	0.487391
1141	ATXN2	0.0579269	0.451488
1142	ATXN2L	0.395846	0.513258
1143	ATXN3	-0.00208031	0.255795
1144	ATXN7	0.0586755	0.393987
1145	ATXN7L1	0.034327	0.359658
1146	ATXN7L2	-0.137072	0.292198
1147	ATXN7L3	0.394799	0.362349
1148	ATXN7L3B	-0.0309493	0.396813
1149	AUH	5.93727e-05	0.568689
1150	AUNIP	0.341063	0.19401
1151	AUP1	0.180826	0.444711
1152	AURKA	0.520918	0.436799
1153	AURKAIP1	0.358055	0.559825
1154	AURKB	0.407113	0.541592
1155	AURKC	-0.246857	0.237611
1156	AUTS2	0.442021	0.451362
1157	AVEN	0.130955	0.315237
1158	AVIL	0.248795	0.283317
1159	AVL9	0.213706	0.445942
1160	AVPI1	0.372019	0.805836
1161	AVPR1A	0.258665	0.414566
1162	AVPR2	0.0964467	0.287996
1163	AXDND1	-0.0973528	0.126918
1164	AXIN1	0.402013	0.296751
1165	AXIN2	0.431769	0.560192
1166	AXL	0.463773	0.724503
1167	AZGP1	0.479736	1.56772
1168	AZI2	-0.0866963	0.34847
1169	AZIN1	-0.0827838	0.601926
1170	AZIN2	0.153491	0.262062
1171	AZU1	-0.262447	0.224421
1172	B2M	0.37096	0.841898
1173	B3GALNT1	0.188706	0.51547
1174	B3GALNT2	0.340035	0.353051
1175	B3GALT1	0.0363756	0.158228
1176	B3GALT2	0.559163	0.432504
1177	B3GALT4	0.348061	0.533761
1178	B3GALT5	0.333309	0.245645
1179	B3GALT6	0.539271	0.436153
1180	B3GAT1	0.192492	0.898662
1181	B3GAT2	-0.0757498	0.055185
1182	B3GAT3	0.227461	0.47338
1183	B3GLCT	0.0275231	0.318166
1184	B3GNT2	0.230457	0.532552
1185	B3GNT4	-0.0140964	0.151239
1186	B3GNT5	0.284805	0.618287
1187	B3GNT7	0.283208	0.463907
1188	B3GNT8	0.412582	0.413632
1189	B3GNT9	0.409009	0.625031
1190	B3GNTL1	0.305552	0.26502
1191	B4GALNT1	0.509555	0.237605
1192	B4GALNT3	0.278583	0.560573
1193	B4GALNT4	0.557465	0.817585
1194	B4GALT1	0.426414	0.536133
1195	B4GALT2	0.0267027	0.386493
1196	B4GALT3	0.511814	0.304542
1197	B4GALT4	-0.0399438	0.310947
1198	B4GALT5	0.338355	0.516858
1199	B4GALT6	0.0297289	0.392424
1200	B4GALT7	0.0582084	0.36673
1201	B4GAT1	-0.0146366	0.408503
1202	B9D1	0.188354	0.324111
1203	B9D2	0.0920379	0.436949
1204	BAALC	0.236215	0.183173
1205	BAAT	0.114249	0.121463
1206	BABAM1	-0.0617072	0.579202
1207	BABAM2	0.072795	0.378888
1208	BACE1	0.404768	0.294788
1209	BACE2	0.190892	0.940802
1210	BACH1	-0.12177	0.589558
1211	BACH2	0.506556	0.239685
1212	BAD	0.221332	0.489996
1213	BAG1	-0.107047	0.485327
1214	BAG2	0.188932	0.486039
1215	BAG3	0.349247	0.557744
1216	BAG4	0.0517602	0.440923
1217	BAG5	0.136852	0.395639
1218	BAG6	0.318327	0.303133
1219	BAHCC1	-0.153675	0.439297
1220	BAHD1	0.139315	0.356304
1221	BAIAP2	0.265587	0.504267
1222	BAIAP2L1	0.298654	0.448799
1223	BAIAP2L2	0.326239	0.942385
1224	BAIAP3	0.478843	0.606137
1225	BAK1	0.224587	0.354546
1226	BAMBI	0.0612242	1.04678
1227	BANF1	0.0493381	0.476891
1228	BANK1	0.230762	1.18708
1229	BANP	0.173286	0.313979
1230	BAP1	0.519437	0.286397
1231	BARD1	0.161962	0.3814
1232	BARX2	0.191626	0.723639
1233	BASP1	0.285082	0.957381
1234	BATF	0.208898	0.861591
1235	BATF2	0.270914	0.484564
1236	BATF3	0.118884	0.420045
1237	BAX	0.0106351	0.534335
1238	BAZ1A	0.0617814	0.512779
1239	BAZ1B	-0.0953047	0.443888
1240	BAZ2A	0.256148	0.515258
1241	BAZ2B	0.0861913	0.379184
1242	BBC3	0.2398	0.460496
1243	BBIP1	-0.123893	0.245529
1244	BBOF1	-0.0122463	0.299652
1245	BBOX1	0.146206	0.410456
1246	BBS1	0.118065	0.110565
1247	BBS10	-0.178774	0.505554
1248	BBS12	-0.0640503	0.341491
1249	BBS2	0.156295	0.406865
1250	BBS4	0.140008	0.709792
1251	BBS5	0.0787485	0.293291
1252	BBS7	-0.0371453	0.314585
1253	BBS9	0.184769	0.234585
1254	BBX	0.264837	0.555135
1255	BCAM	0.490586	0.729016
1256	BCAN	-0.0883924	0.166358
1257	BCAP29	-0.0549733	0.171217
1258	BCAP31	0.239689	0.400077
1259	BCAR1	0.10511	0.482877
1260	BCAR3	0.379304	0.471315
1261	BCAS1	0.554409	0.864868
1262	BCAS2	0.0729503	0.3699
1263	BCAS3	0.106058	0.336901
1264	BCAS4	0.273834	0.3864
1265	BCAT1	0.161567	0.439016
1266	BCAT2	0.308647	0.547767
1267	BCCIP	0.189739	0.333729
1268	BCDIN3D	0.29872	0.227668
1269	BCHE	0.228213	0.684776
1270	BCKDHA	0.0599592	0.109143
1271	BCKDHB	-0.0633616	0.51621
1272	BCKDK	0.232226	0.360101
1273	BCL10	-0.0502798	0.369398
1274	BCL11A	0.422765	0.33063
1275	BCL11B	0.29319	0.340316
1276	BCL2	0.497039	0.592292
1277	BCL2A1	0.172008	0.752029
1278	BCL2L1	0.21935	0.369934
1279	BCL2L10	0.414448	0.496568
1280	BCL2L11	-0.104026	0.408351
1281	BCL2L12	0.182829	0.420198
1282	BCL2L13	0.00796321	0.331993
1283	BCL2L14	-0.0995075	0.455813
1284	BCL2L15	-0.0491471	0.199247
1285	BCL2L2	0.13495	0.454861
1286	BCL3	0.0299672	0.932115
1287	BCL6	0.167443	0.74005
1288	BCL6B	0.300062	0.492574
1289	BCL7A	0.17476	0.387039
1290	BCL7B	0.231903	0.383928
1291	BCL7C	-0.0892016	0.45985
1292	BCL9	0.184734	0.51184
1293	BCL9L	0.205546	0.690256
1294	BCLAF1	-0.0844344	0.385552
1295	BCLAF3	-0.121274	0.373569
1296	BCO1	0.348881	0.269937
1297	BCO2	0.244324	0.151588
1298	BCOR	0.0303539	0.650737
1299	BCORL1	0.193145	0.395148
1300	BCR	0.120119	0.329113
1301	BCS1L	0.416249	0.376961
1302	BDH1	0.642504	0.435085
1303	BDH2	0.393257	0.579838
1304	BDKRB1	0.0805371	0.101536
1305	BDKRB2	0.363021	0.537795
1306	BDNF	0.39948	0.196886
1307	BDP1	-0.020655	0.529396
1308	BEAN1	0.46587	0.138116
1309	BECN1	-0.0296218	0.494244
1310	BEGAIN	0.289064	0.219356
1311	BEND3	0.402945	0.503288
1312	BEND4	0.164114	0.957328
1313	BEND5	0.248866	0.443953
1314	BEND6	0.450557	0.202229
1315	BEND7	0.139028	0.366584
1316	BEST1	0.31438	0.203136
1317	BEST4	0.0824345	0.155613
1318	BET1	-0.165232	0.294005
1319	BET1L	0.216689	0.278715
1320	BEX1	0.505555	0.981087
1321	BEX2	0.167235	0.702773
1322	BEX3	0.325441	0.502953
1323	BEX4	0.326028	0.569821
1324	BEX5	0.261522	1.02462
1325	BFAR	0.272046	0.301921
1326	BFSP1	-0.236032	0.222363
1327	BFSP2	0.0556671	0.0708247
1328	BGLAP	-0.261258	0.421561
1329	BGN	0.154281	0.977038
1330	BHLHA15	0.315116	0.981738
1331	BHLHE22	0.319981	0.154155
1332	BHLHE40	0.471169	1.14771
1333	BHLHE41	0.260367	0.845159
1334	BHMT	0.00550028	0.0715796
1335	BHMT2	0.514837	0.541579
1336	BICC1	0.0382607	0.609473
1337	BICD1	0.423941	0.696528
1338	BICD2	0.375163	0.395604
1339	BICDL1	0.36487	0.469486
1340	BICDL2	-0.0827994	0.683009
1341	BICRA	0.153591	0.341519
1342	BICRAL	-0.0905076	0.465245
1343	BID	0.0875768	0.332508
1344	BIK	0.522247	0.560718
1345	BIN1	0.259334	0.641133
1346	BIN2	0.237847	0.550485
1347	BIN3	0.266602	0.51358
1348	BIRC2	0.205947	0.466964
1349	BIRC3	0.296713	0.889791
1350	BIRC5	0.5545	0.635707
1351	BIRC6	-0.109571	0.491939
1352	BIRC7	0.0515935	0.203639
1353	BISPR	0.382517	0.388823
1354	BIVM	0.132073	0.321931
1355	BLACAT1	0.339181	0.0712314
1356	BLCAP	0.0495995	0.35145
1357	BLK	0.321086	0.34899
1358	BLM	0.438836	0.228983
1359	BLMH	-0.0486242	0.387847
1360	BLNK	-0.0864883	0.44995
1361	BLOC1S1	-0.0839347	0.703531
1362	BLOC1S2	-0.0573664	0.388304
1363	BLOC1S3	0.118473	0.285262
1364	BLOC1S4	0.382603	0.331165
1365	BLOC1S5	-0.0774878	0.258033
1366	BLOC1S6	-0.0178272	0.501873
1367	BLVRA	0.222519	0.478975
1368	BLVRB	0.169753	0.625406
1369	BLZF1	0.0222874	0.379308
1370	BMERB1	0.513706	0.567555
1371	BMF	-0.133692	0.598042
1372	BMI1	-0.144408	0.411904
1373	BMP1	0.378352	0.440651
1374	BMP2	0.386452	0.533877
1375	BMP2K	0.0268095	0.275419
1376	BMP4	0.347737	0.674892
1377	BMP5	0.0879865	0.836694
1378	BMP6	0.286634	0.848276
1379	BMP7	0.232037	0.854633
1380	BMP8A	0.178127	0.381959
1381	BMP8B	0.147764	0.431911
1382	BMPER	0.353355	0.479809
1383	BMPR1A	0.209382	0.417144
1384	BMPR1B	0.249505	0.736818
1385	BMPR2	0.0998092	0.517154
1386	BMS1	-0.00806367	0.334962
1387	BMS1P4	-0.178755	0.190795
1388	BMX	0.083828	0.49445
1389	BNC1	0.429988	0.136559
1390	BNC2	0.584975	0.297942
1391	BNIP1	0.105155	0.344483
1392	BNIP2	0.316559	0.483602
1393	BNIP3	0.108385	0.492786
1394	BNIP3L	0.340312	0.506096
1395	BNIPL	0.474205	0.651754
1396	BOC	0.512731	0.631982
1397	BOD1	0.294775	0.417285
1398	BOD1L1	-0.10424	0.512767
1399	BOK	-0.107747	0.635677
1400	BOLA1	0.16031	0.427707
1401	BOLA2B	-0.18357	0.25519
1402	BOLA3	0.26877	0.318408
1403	BOP1	0.364936	0.593731
1404	BORA	-0.0490326	0.258322
1405	BORCS5	0.0072918	0.249796
1406	BORCS6	-0.0307456	0.50144
1407	BORCS7	-0.0471089	0.490587
1408	BORCS8	-0.301503	0.396636
1409	BPGM	-0.293594	0.38081
1410	BPHL	0.335131	0.3558
1411	BPI	0.323977	0.113005
1412	BPNT1	0.0515825	0.395691
1413	BPNT2	-0.0343253	0.463518
1414	BPTF	-0.0144858	0.476904
1415	BRAF	0.113886	0.337374
1416	BRAP	0.19779	0.205681
1417	BRAT1	0.0625724	0.4819
1418	BRCA1	0.346301	0.290697
1419	BRCA2	0.222676	0.181819
1420	BRCC3	0.233503	0.375332
1421	BRD1	-0.0209496	0.403355
1422	BRD2	0.274443	0.432778
1423	BRD3	-0.0392102	0.57115
1424	BRD3OS	0.138539	0.307745
1425	BRD4	0.221679	0.396065
1426	BRD7	-0.0337987	0.256306
1427	BRD8	0.249531	0.424354
1428	BRD9	0.529655	0.254433
1429	BRF1	0.257747	0.290263
1430	BRF2	-0.0755004	0.385337
1431	BRI3	0.216478	0.473342
1432	BRI3BP	0.247718	0.413366
1433	BRICD5	0.259214	0.463706
1434	BRINP1	0.0490714	0.639226
1435	BRINP2	0.0538862	0.0455645
1436	BRIP1	0.335457	0.205755
1437	BRIX1	0.405478	0.29617
1438	BRK1	0.463549	0.419496
1439	BRMS1	-0.253291	0.535288
1440	BRMS1L	-0.0922813	0.306428
1441	BROX	-0.104062	0.465178
1442	BRPF1	0.166872	0.391173
1443	BRPF3	0.155389	0.541867
1444	BRSK1	-0.155004	0.634045
1445	BRSK2	0.444786	0.755305
1446	BRWD1	0.0236966	0.440793
1447	BRWD3	0.210375	0.313485
1448	BSCL2	-0.0740461	0.169637
1449	BSDC1	0.259024	0.338002
1450	BSG	0.213463	0.509159
1451	BSN	0.318437	0.134861
1452	BSPRY	0.440538	0.372874
1453	BST1	0.483966	0.238829
1454	BST2	0.338368	1.25393
1455	BTAF1	0.0538721	0.676147
1456	BTBD1	0.0265335	0.356582
1457	BTBD10	-0.18157	0.337595
1458	BTBD16	0.111827	0.25257
1459	BTBD18	0.0302915	0.0603728
1460	BTBD19	0.306019	0.366143
1461	BTBD2	0.243952	0.369263
1462	BTBD3	0.385639	0.436098
1463	BTBD6	0.245837	0.381899
1464	BTBD7	0.0767552	0.387099
1465	BTBD8	0.0780987	0.320846
1466	BTBD9	0.102874	0.321796
1467	BTC	-0.0461297	0.393771
1468	BTD	0.300914	0.388758
1469	BTF3	0.294545	0.548536
1470	BTF3L4	0.253702	0.27898
1471	BTG1	0.151779	0.508749
1472	BTG2	0.198014	1.30915
1473	BTG3	0.36131	0.607784
1474	BTK	0.35366	0.386973
1475	BTLA	0.205106	0.268827
1476	BTN2A1	0.287637	0.486557
1477	BTN2A2	0.368119	0.430248
1478	BTN3A1	0.281887	0.678133
1479	BTN3A2	0.30317	0.743325
1480	BTN3A3	0.250772	0.619547
1481	BTNL8	0.101033	0.0327372
1482	BTNL9	0.239477	0.383959
1483	BTRC	0.077372	0.43636
1484	BUB1	0.480474	0.444018
1485	BUB1B	0.448451	0.431541
1486	BUB3	0.117928	0.327885
1487	BUD13	0.106862	0.345563
1488	BUD23	0.200352	0.360396
1489	BUD31	0.145185	0.305197
1490	BYSL	0.422331	0.335159
1491	BZW1	0.0573823	0.460907
1492	BZW2	0.473982	0.50857
1493	C10orf143	-0.152037	0.207543
1494	C10orf55	0.186864	0.0707098
1495	C10orf67	-0.0736758	0.0390223
1496	C10orf88	-0.0544742	0.285995
1497	C11orf16	0.129341	0.177545
1498	C11orf21	0.27181	0.217146
1499	C11orf24	0.124661	0.363638
1500	C11orf42		0.363638
1501	C11orf54	0.251775	0.413151
1502	C11orf58	-0.280284	0.33603
1503	C11orf65	0.148613	0.0950029
1504	C11orf68	-0.242269	0.466348
1505	C11orf71	0.0543769	0.548982
1506	C11orf91	0.329703	0.0959533
1507	C11orf96	0.274518	1.24077
1508	C12orf42	0.151628	0.0481865
1509	C12orf43	-0.117547	0.207837
1510	C12orf56	-0.305064	0.501849
1511	C12orf57	0.190459	0.757845
1512	C12orf60	0.365626	0.441955
1513	C12orf71		0.441955
1514	C12orf75	0.509193	0.678176
1515	C12orf76	0.0933021	0.304825
1516	C13orf46	0.175881	0.576509
1517	C14orf119	0.249874	0.304007
1518	C14orf132	0.400662	0.530062
1519	C14orf28	0.159656	0.275894
1520	C14orf93	0.00272348	0.312357
1521	C15orf39	0.252286	0.507354
1522	C15orf40	-0.0975086	0.200421
1523	C15orf48	0.0973263	1.61965
1524	C15orf61	0.441907	0.238234
1525	C15orf62	0.135119	0.313619
1526	C16orf54	0.333728	0.598522
1527	C16orf74	0.337662	0.495245
1528	C16orf86	0.189702	0.42134
1529	C16orf87	0.176263	0.292066
1530	C16orf89	0.381692	0.710438
1531	C16orf95	0.427527	0.117308
1532	C16orf96	-0.00102523	0.124562
1533	C17orf100	0.107426	0.338822
1534	C17orf107	0.128433	0.313831
1535	C17orf113	-0.164732	0.442228
1536	C17orf58	0.134095	0.554784
1537	C17orf67	0.161445	0.301575
1538	C17orf75	-0.00274429	0.298913
1539	C17orf78	0.107253	0.0972879
1540	C17orf99	-0.0066188	0.0804087
1541	C18orf21	0.0365674	0.356638
1542	C18orf32	0.098217	0.20659
1543	C18orf54	0.318419	0.170672
1544	C19orf12	0.164792	0.296383
1545	C19orf18	0.021495	0.69097
1546	C19orf25	-0.296245	0.444393
1547	C19orf38	0.225557	0.348687
1548	C19orf44	-0.37705	0.272869
1549	C19orf47	-0.143677	0.250552
1550	C19orf53	0.0961108	0.614634
1551	C19orf67	-0.136323	0.0972588
1552	C19orf73	0.0997279	0.529785
1553	C19orf81	0.131661	0.949517
1554	C19orf84	-0.125063	0.044637
1555	C1D	0.2455	0.392579
1556	C1GALT1	0.00418247	0.376783
1557	C1GALT1C1	0.288103	0.393386
1558	C1GALT1C1L	0.21237	0.363902
1559	C1QA	0.206033	1.03852
1560	C1QB	0.194495	0.942683
1561	C1QBP	0.372243	0.428887
1562	C1QC	0.209743	0.899331
1563	C1QL1	0.215012	0.389705
1564	C1QL3	-0.270376	0.432832
1565	C1QL4	0.093901	0.0746291
1566	C1QTNF1	0.431201	0.747381
1567	C1QTNF12	0.0381754	0.27698
1568	C1QTNF2	0.156527	0.414473
1569	C1QTNF3	0.326088	0.96688
1570	C1QTNF4	0.161109	0.335914
1571	C1QTNF6	-0.0373991	0.505929
1572	C1QTNF7	0.387276	0.539212
1573	C1R	0.328401	1.00529
1574	C1RL	0.233049	0.701509
1575	C1S	0.415413	0.95744
1576	C1orf115	0.278025	0.804048
1577	C1orf116	0.263125	0.545793
1578	C1orf122	0.283869	0.592471
1579	C1orf127	0.11218	0.117186
1580	C1orf131	0.217178	0.285618
1581	C1orf146	0.0059889	0.0742688
1582	C1orf159	0.186989	0.426503
1583	C1orf162	0.16581	0.454192
1584	C1orf174	0.119563	0.322404
1585	C1orf198	0.295502	0.3633
1586	C1orf21	0.108471	0.526775
1587	C1orf210	0.178001	0.412136
1588	C1orf216	0.169693	0.364676
1589	C1orf220	-0.0947427	0.187242
1590	C1orf226	0.0177271	0.511028
1591	C1orf35	0.328584	0.396025
1592	C1orf43	0.354465	0.397658
1593	C1orf50	0.0143462	0.217418
1594	C1orf52	0.215304	0.349907
1595	C1orf53	0.254686	0.525573
1596	C1orf54	0.417973	0.664451
1597	C1orf56	0.313756	0.376546
1598	C1orf74	0.154296	0.366624
1599	C2	0.149486	0.645032
1600	C20orf144	0.0942539	0.242849
1601	C20orf202	-0.0159053	0.066312
1602	C20orf204	0.233955	0.228137
1603	C20orf96	0.149668	0.589016
1604	C21orf58	0.498333	0.342946
1605	C21orf91	0.37136	0.32064
1606	C22orf15	0.03402	0.170466
1607	C22orf23	-0.0565683	0.399142
1608	C22orf31	0.115446	0.166623
1609	C22orf39	0.102636	0.324113
1610	C2CD2	0.15667	0.423484
1611	C2CD2L	0.148487	0.373626
1612	C2CD3	0.1165	0.341545
1613	C2CD4A	0.205398	0.704088
1614	C2CD4B	0.0546397	0.814827
1615	C2CD4C	0.0249118	0.528582
1616	C2CD4D	0.378289	0.414033
1617	C2CD5	-0.122291	0.444587
1618	C2CD6	0.058542	0.110934
1619	C2orf15	0.340218	0.328232
1620	C2orf42	0.123463	0.180403
1621	C2orf49	0.0207553	0.346068
1622	C2orf66	0.15618	0.167921
1623	C2orf68	0.203868	0.264717
1624	C2orf69	-0.0581221	0.474972
1625	C2orf72	0.297139	1.18919
1626	C2orf74	0.161398	0.175125
1627	C2orf76	0.200135	0.336145
1628	C2orf81	-0.062356	0.192588
1629	C2orf88	0.563585	0.408164
1630	C2orf92	0.481241	0.299716
1631	C3	0.21442	1.4554
1632	C3AR1	0.171777	0.554745
1633	C3orf18	0.35663	0.41197
1634	C3orf20	0.110176	0.0745164
1635	C3orf33	0.0258164	0.251221
1636	C3orf38	-0.109122	0.346694
1637	C3orf49	-0.0485721	0.0494298
1638	C3orf52	0.267412	0.431182
1639	C3orf62	0.192706	0.316985
1640	C3orf70	0.635429	0.488173
1641	C3orf80	0.00816385	0.348541
1642	C4A	0.125904	1.03077
1643	C4B	0.171621	1.04771
1644	C4BPA	-0.0312448	0.239088
1645	C4BPB	0.110427	0.0534833
1646	C4orf19	0.262844	0.504693
1647	C4orf3	0.216368	0.46986
1648	C4orf33	0.301918	0.281339
1649	C4orf46	0.125833	0.315043
1650	C4orf50	0.358171	0.0994767
1651	C5	-0.0697491	0.559299
1652	C5AR1	0.157914	0.748781
1653	C5AR2	0.286754	0.142012
1654	C5orf15	-0.0283655	0.527638
1655	C5orf22	0.0054194	0.385226
1656	C5orf24	-0.0806733	0.586253
1657	C5orf34	0.400577	0.234068
1658	C5orf58	0.128785	0.0605643
1659	C5orf63	0.23739	0.290491
1660	C6	0.129737	0.377573
1661	C6orf120	-0.0598611	0.532461
1662	C6orf132	0.146424	0.442919
1663	C6orf136	0.256699	0.337393
1664	C6orf141	-0.00819079	0.343027
1665	C6orf163	0.0205148	0.230045
1666	C6orf226	0.239363	0.616265
1667	C6orf47	0.0651087	0.278238
1668	C6orf52	0.179323	0.515153
1669	C6orf58	0.106614	0.105166
1670	C6orf62	0.314762	0.423249
1671	C6orf89	0.0745822	0.358924
1672	C7	0.501893	1.09607
1673	C7orf25	-0.249154	0.120985
1674	C7orf50	-0.0761922	0.505355
1675	C7orf57	0.16847	0.244892
1676	C8G	0.134856	0.340374
1677	C8orf33	0.385627	0.401755
1678	C8orf48	0.100711	0.114791
1679	C8orf58	0.0173447	0.432017
1680	C8orf76	0.0484467	0.356993
1681	C8orf82	-0.0506331	0.646253
1682	C8orf88	0.676917	0.432097
1683	C9orf152	0.247047	0.608056
1684	C9orf153	0.101152	0.083638
1685	C9orf163	0.546805	0.228197
1686	C9orf40	0.189816	0.325035
1687	C9orf43	0.506536	0.198391
1688	C9orf50	0.0849828	0.083533
1689	C9orf72	-0.120456	0.544516
1690	C9orf78	0.251011	0.265359
1691	C9orf85	0.153834	0.282564
1692	CA11	0.517593	0.709337
1693	CA12	0.296062	0.579977
1694	CA13	0.234937	0.562052
1695	CA14	0.394277	0.483961
1696	CA2	0.298759	0.656774
1697	CA3	-0.166823	1.22639
1698	CA4	-0.10664	0.430602
1699	CA5B	-0.073336	0.461868
1700	CA8	0.114433	0.517387
1701	CA9	-0.153449	0.203996
1702	CAAP1	0.0536393	0.381823
1703	CAB39	-0.117799	0.497358
1704	CAB39L	-0.00275256	0.650489
1705	CABCOCO1	0.0861464	0.761558
1706	CABIN1	-0.0816502	0.332457
1707	CABLES1	0.424145	0.323371
1708	CABLES2	0.379987	0.310001
1709	CABP1	0.343507	0.167688
1710	CABP4	0.577189	0.388686
1711	CABP7	-0.225813	0.102452
1712	CABYR	0.298848	0.188589
1713	CACFD1	0.463521	0.44222
1714	CACHD1	0.512552	0.547734
1715	CACNA1A	0.0426279	0.0790728
1716	CACNA1C	0.375264	0.449952
1717	CACNA1D	0.505963	1.0352
1718	CACNA1E	0.121167	0.0313931
1719	CACNA1F	0.00109666	0.0473932
1720	CACNA1G	0.325838	0.466855
1721	CACNA1H	0.267611	0.921313
1722	CACNA1I	0.101357	0.19729
1723	CACNA1S	-0.175143	0.165775
1724	CACNA2D1	0.457941	0.756611
1725	CACNA2D2	0.257547	0.396367
1726	CACNA2D3	0.458026	0.317228
1727	CACNA2D4	0.26203	0.133949
1728	CACNB1	0.456358	0.356074
1729	CACNB2	0.203338	0.279595
1730	CACNB3	0.252104	0.436803
1731	CACNB4	0.378408	0.191843
1732	CACNG4	0.593609	1.09118
1733	CACNG8	0.174105	0.0505788
1734	CACTIN	-0.0749551	0.319093
1735	CACUL1	-0.0750523	0.320794
1736	CACYBP	0.0920002	0.347367
1737	CAD	0.375278	0.458657
1738	CADM1	0.0106072	0.689597
1739	CADM2	0.144421	0.602362
1740	CADM3	0.262059	0.399877
1741	CADM4	0.359935	0.458648
1742	CADPS	0.325046	0.828053
1743	CADPS2	-0.0154945	0.533137
1744	CAGE1	0.270671	0.0466713
1745	CAHM	0.157396	0.392394
1746	CALB1	0.102028	0.0580021
1747	CALB2	0.00852091	0.197445
1748	CALCB	-0.084831	0.106066
1749	CALCOCO1	0.163771	0.451048
1750	CALCOCO2	0.0506566	0.30125
1751	CALCR	-0.0249779	0.0608433
1752	CALCRL	0.297398	0.657483
1753	CALD1	0.582206	0.732401
1754	CALHM2	0.510784	0.487814
1755	CALHM5	0.293728	0.243027
1756	CALHM6	0.104312	0.386302
1757	CALM1	0.556486	0.474993
1758	CALM2	-0.00229762	0.37848
1759	CALM3	-0.0558007	0.427322
1760	CALML4	0.0622863	0.038823
1761	CALML6	-0.011099	0.284085
1762	CALN1	0.136956	0.281252
1763	CALR	0.36753	0.501787
1764	CALU	-0.048016	0.545583
1765	CALY	0.0906789	0.155149
1766	CAMK1	0.382104	0.414356
1767	CAMK1D	0.370423	0.539587
1768	CAMK1G	0.341163	0.336542
1769	CAMK2A	0.423624	0.214463
1770	CAMK2B	0.4853	0.652385
1771	CAMK2D	-0.0231525	0.589775
1772	CAMK2G	0.444587	0.407956
1773	CAMK2N1	0.1595	1.06208
1774	CAMK2N2	0.231186	0.582884
1775	CAMK4	0.279893	0.403957
1776	CAMKK1	-0.0756252	0.472313
1777	CAMKK2	0.394383	0.807113
1778	CAMKMT	-0.0462475	0.240746
1779	CAMLG	-0.00454106	0.30101
1780	CAMP	0.0944821	0.294567
1781	CAMSAP1	-0.0287845	0.444008
1782	CAMSAP2	0.329168	0.368831
1783	CAMSAP3	0.554616	0.478361
1784	CAMTA1	0.0547459	0.250118
1785	CAMTA2	0.261873	0.387188
1786	CAND1	-0.0773528	0.450831
1787	CAND2	0.537731	0.376169
1788	CANT1	0.410368	0.516276
1789	CANX	0.164142	0.49778
1790	CAP1	0.115201	0.430506
1791	CAP2	0.442134	0.677912
1792	CAPG	0.38495	0.933444
1793	CAPN1	0.152147	0.470754
1794	CAPN10	0.145854	0.395129
1795	CAPN11	0.172536	0.125808
1796	CAPN12	0.0491505	0.214663
1797	CAPN13	0.267677	0.542205
1798	CAPN14	0.139544	0.118899
1799	CAPN15	0.63323	0.338848
1800	CAPN2	0.263326	0.611662
1801	CAPN3	-0.010442	0.216174
1802	CAPN5	0.00132224	0.846085
1803	CAPN6	0.473237	0.769394
1804	CAPN7	-0.120143	0.429061
1805	CAPN8	0.213085	0.487979
1806	CAPN9	-0.0769408	0.564698
1807	CAPNS1	0.219488	0.38736
1808	CAPRIN1	0.0756219	0.485988
1809	CAPRIN2	0.0369962	0.413213
1810	CAPS	0.00306232	0.890952
1811	CAPS2	0.0713543	0.315663
1812	CAPZA1	0.0603058	0.429145
1813	CAPZA2	0.0593128	0.430798
1814	CAPZB	0.2435	0.322031
1815	CARD10	-0.0606178	0.465659
1816	CARD11	0.314981	0.55956
1817	CARD14	0.0770834	0.27313
1818	CARD16	0.333652	0.566771
1819	CARD19	-0.0530032	0.397049
1820	CARD6	0.277095	0.336384
1821	CARD8	0.0981988	0.26489
1822	CARD9	0.191607	0.339332
1823	CARF	0.194071	0.291297
1824	CARHSP1	-0.00770208	0.450045
1825	CARM1	0.00474005	0.46662
1826	CARMIL1	0.124651	0.484106
1827	CARMIL2	0.191815	0.34656
1828	CARMIL3	0.0819999	0.139144
1829	CARNMT1	0.10251	0.386621
1830	CARNS1	0.11257	0.220368
1831	CARS1	0.0485455	0.325409
1832	CARS2	0.137921	0.378877
1833	CASC11	0.191052	0.213047
1834	CASC18	0.320055	0.0743483
1835	CASC2	-0.0225695	0.147016
1836	CASC3	-0.00689433	0.384402
1837	CASC8	0.399093	0.320703
1838	CASC9	0.0384297	0.231336
1839	CASD1	-0.156749	0.526694
1840	CASK	-0.159445	0.302743
1841	CASKIN1	0.576392	0.332315
1842	CASKIN2	0.371177	0.357805
1843	CASP1	0.360936	0.626694
1844	CASP10	0.366841	0.455226
1845	CASP2	0.105866	0.530177
1846	CASP3	0.209404	0.424133
1847	CASP4	0.408434	0.501899
1848	CASP5	-0.0211994	0.0643488
1849	CASP6	0.0483713	0.392202
1850	CASP7	0.213977	0.626104
1851	CASP8	0.0894037	0.47485
1852	CASP8AP2	0.215237	0.446224
1853	CASP9	0.0277666	0.368903
1854	CASQ1	0.551037	0.713857
1855	CASQ2	0.496046	0.728373
1856	CASR	0.157547	0.0244922
1857	CASS4	0.280531	0.212345
1858	CAST	0.125407	0.448652
1859	CASTOR1	0.112036	0.149443
1860	CASTOR2	0.00933663	0.403635
1861	CASZ1	0.0771757	0.491081
1862	CAT	0.0887875	0.581179
1863	CATIP	0.154481	0.299141
1864	CATSPER1	0.0374376	0.0780124
1865	CATSPER2	0.238751	0.285623
1866	CATSPER3	0.0919054	0.184067
1867	CATSPERB	0.233647	0.3038
1868	CATSPERE	0.126807	0.129903
1869	CATSPERG	0.147196	0.244551
1870	CAV1	0.63643	0.781217
1871	CAV2	0.622273	0.57411
1872	CAVIN1	0.598678	0.797056
1873	CAVIN2	0.48418	0.771277
1874	CAVIN3	0.363226	0.670068
1875	CAVIN4	-0.24169	0.419275
1876	CBARP	0.209066	0.242999
1877	CBFA2T2	-0.0394729	0.594953
1878	CBFA2T3	-0.211236	0.554875
1879	CBFB	0.102178	0.510937
1880	CBL	0.415479	0.387124
1881	CBLB	0.107089	0.354167
1882	CBLC	0.315176	0.89853
1883	CBLL1	0.0117983	0.594719
1884	CBLN1	0.084777	0.261809
1885	CBLN3	0.191504	0.431886
1886	CBLN4	-0.0294819	0.0989852
1887	CBR1	0.394173	0.575294
1888	CBR3	0.118009	0.867788
1889	CBR4	0.321255	0.535661
1890	CBS	0.192658	0.479664
1891	CBX1	-0.0540595	0.404458
1892	CBX2	0.46123	0.525297
1893	CBX3	0.542936	0.433145
1894	CBX4	0.219445	0.542306
1895	CBX5	0.0594919	0.440174
1896	CBX6	-0.00826454	0.558147
1897	CBX7	0.47532	0.471068
1898	CBX8	0.547257	0.375837
1899	CBY1	0.268793	0.376468
1900	CBY3	0.111034	0.135759
1901	CC2D1A	-0.284855	0.434954
1902	CC2D1B	0.035605	0.237176
1903	CC2D2A	0.124485	0.354914
1904	CC2D2B	0.370333	0.0793778
1905	CCAR1	0.15149	0.439937
1906	CCAR2	0.12235	0.408953
1907	CCBE1	0.391397	0.336855
1908	CCDC102A	0.199254	0.499766
1909	CCDC102B	0.0233647	0.245119
1910	CCDC106	0.117773	0.459705
1911	CCDC107	0.0638015	0.481705
1912	CCDC110	0.211671	0.43646
1913	CCDC112	-0.0337164	0.43048
1914	CCDC115	0.204691	0.329174
1915	CCDC116	0.313934	0.101996
1916	CCDC117	-0.159573	0.427291
1917	CCDC12	0.0377904	0.426853
1918	CCDC120	0.181744	0.383311
1919	CCDC121	-0.183631	0.350619
1920	CCDC122	-0.0203888	0.315487
1921	CCDC124	0.154082	0.522724
1922	CCDC125	0.356985	0.483437
1923	CCDC126	-0.0709295	0.3619
1924	CCDC127	-0.212645	0.209355
1925	CCDC13	-0.0129453	0.0592356
1926	CCDC134	-0.0962622	0.376168
1927	CCDC136	0.323578	0.499946
1928	CCDC137	-0.0477782	0.449556
1929	CCDC138	0.406338	0.30076
1930	CCDC14	0.289717	0.538578
1931	CCDC141	0.068239	0.389575
1932	CCDC142	0.270708	0.320796
1933	CCDC144A	-0.142776	0.258853
1934	CCDC146	0.154061	0.567505
1935	CCDC148	-0.0319227	0.184476
1936	CCDC149	0.342543	0.341629
1937	CCDC15	-0.0362194	0.353304
1938	CCDC150	0.434956	0.070349
1939	CCDC152	0.234754	0.188032
1940	CCDC154	0.00483393	0.726842
1941	CCDC157	0.234911	0.20473
1942	CCDC158	0.163711	0.15328
1943	CCDC159	0.350894	0.518172
1944	CCDC163	0.249015	0.469081
1945	CCDC167	0.155593	0.60683
1946	CCDC168	-0.161958	0.0212742
1947	CCDC17	0.18674	0.441077
1948	CCDC170	0.0307577	0.349011
1949	CCDC171	0.119747	0.12492
1950	CCDC174	0.159139	0.281646
1951	CCDC18	0.279465	0.184291
1952	CCDC180	0.274769	0.131741
1953	CCDC181	0.471141	0.165401
1954	CCDC183	-0.0212176	0.342831
1955	CCDC184	0.0602764	0.346917
1956	CCDC186	-0.195408	0.720983
1957	CCDC187	0.0242196	0.285275
1958	CCDC188	-0.117877	0.283942
1959	CCDC191	-0.0861054	0.365374
1960	CCDC192	0.107506	0.118623
1961	CCDC194	0.258195	0.242118
1962	CCDC196	0.0162724	0.038551
1963	CCDC200	0.05975	0.159006
1964	CCDC22	0.419635	0.309354
1965	CCDC24	0.254277	0.495699
1966	CCDC25	0.0527457	0.396691
1967	CCDC26	0.0152862	0.0878676
1968	CCDC28A	0.21351	0.464417
1969	CCDC28B	0.0472604	0.435432
1970	CCDC3	0.29657	0.755965
1971	CCDC30	-0.0631826	0.127059
1972	CCDC32	-0.243582	0.283392
1973	CCDC34	0.457914	0.342326
1974	CCDC38	0.157973	0.0329752
1975	CCDC39	-0.125347	0.0303943
1976	CCDC40	0.455176	0.4368
1977	CCDC43	0.35059	0.277274
1978	CCDC47	0.110676	0.429662
1979	CCDC50	0.0212866	0.512973
1980	CCDC51	0.327676	0.330473
1981	CCDC57	-0.00917984	0.501105
1982	CCDC59	0.247897	0.302464
1983	CCDC6	0.243941	0.519297
1984	CCDC61	0.0549396	0.509703
1985	CCDC62	0.144864	0.0705472
1986	CCDC65	-0.0656617	0.31866
1987	CCDC66	0.159002	0.302342
1988	CCDC68	0.374912	0.455918
1989	CCDC69	0.59335	0.64949
1990	CCDC7	0.0936118	0.156662
1991	CCDC71	-0.0118575	0.341725
1992	CCDC71L	0.178922	0.484237
1993	CCDC73	0.0760789	0.046065
1994	CCDC74A	0.138923	0.825996
1995	CCDC74B	0.353679	0.662726
1996	CCDC77	0.16892	0.297379
1997	CCDC78	0.399853	0.697924
1998	CCDC8	0.532653	0.661868
[truncated: 14,060 more rows]

## Sheet: no nonlinearity
	gene	pcc	rmse
0	A1BG	-0.00827715	0.0837146
1	A2M	0.201682	2.54082
2	A2ML1	0.284959	0.489785
3	A4GALT	0.408451	1.05599
4	AAAS	0.0346403	1.05175
5	AACS	0.354715	0.779044
6	AADAT	0.293322	1.3391
7	AAGAB	0.224521	1.03388
8	AAK1	0.0592121	0.93804
9	AAMDC	0.0879059	0.776797
10	AAMP	0.232838	1.72419
11	AANAT	0.0556836	0.0634479
12	AAR2	0.0932168	1.32178
13	AARD	-0.0103911	0.2899
14	AARS1	0.328738	1.19721
15	AARS2	-0.0742292	0.77563
16	AARSD1	-0.0511943	0.213254
17	AASDH	0.027603	0.661209
18	AASDHPPT	-0.087256	0.973305
19	AASS	-0.0131145	0.981704
20	AATBC	0.217097	0.412499
21	AATF	0.0419133	1.36634
22	AATK	0.144239	0.453457
23	ABAT	0.420539	1.37537
24	ABCA1	-0.0700356	0.806224
25	ABCA10	0.11055	0.173165
26	ABCA12	0.183983	0.182396
27	ABCA13	0.0444671	0.0443709
28	ABCA2	0.334629	1.12073
29	ABCA3	0.304267	1.10796
30	ABCA4	-0.0233954	0.116983
31	ABCA5	0.107973	0.609854
32	ABCA6	0.354045	0.35305
33	ABCA7	-0.0376646	0.550907
34	ABCA8	0.313676	0.744864
35	ABCA9	0.142884	0.350207
36	ABCB1	0.38988	1.03027
37	ABCB10	-0.189049	0.802573
38	ABCB11	0.150261	0.0828768
39	ABCB4	0.140482	0.206932
40	ABCB5	0.00139221	0.222815
41	ABCB6	0.286839	0.125779
42	ABCB7	-0.0438951	0.904603
43	ABCB8	-0.0686787	0.792496
44	ABCB9	-0.060734	0.218898
45	ABCC1	0.0571278	1.32283
46	ABCC10	-0.0905376	0.637431
47	ABCC11	0.133728	0.989067
48	ABCC2	0.077651	0.1721
49	ABCC3	0.417984	0.627336
50	ABCC4	0.408447	2.17496
51	ABCC5	-0.00943256	0.696572
52	ABCC6	0.333812	0.492982
53	ABCC8	0.362855	0.453779
54	ABCC9	0.42359	0.70871
55	ABCD1	0.200378	0.802874
56	ABCD2	0.135514	0.145234
57	ABCD3	0.124409	0.869093
58	ABCD4	-0.0676921	0.751194
59	ABCE1	0.0343335	1.13904
60	ABCF1	0.0495578	1.26147
61	ABCF2	0.00847034	0.7097
62	ABCF3	0.0644662	1.33448
63	ABCG1	-0.056034	0.985957
64	ABCG2	0.480949	1.04265
65	ABCG4	-0.00289886	0.0664006
66	ABCG5		0.0664006
67	ABCG8	-0.0831999	0.0423678
68	ABHD1	0.427864	0.382176
69	ABHD10	0.242657	1.55882
70	ABHD11	-0.0892243	1.58194
71	ABHD12	0.0551104	1.77221
72	ABHD12B	0.0372079	0.0534463
73	ABHD13	0.124445	0.603625
74	ABHD14A	0.141654	0.930176
75	ABHD14B	0.425767	1.498
76	ABHD15	-0.02368	0.52123
77	ABHD16A	-0.0757145	0.173056
78	ABHD17A	-0.00618541	0.988641
79	ABHD17B	0.0452853	0.78684
80	ABHD17C	0.213698	1.27647
81	ABHD18	0.280378	0.439553
82	ABHD2	0.0564659	2.11369
83	ABHD3	0.142441	0.8634
84	ABHD4	-0.0912403	0.999196
85	ABHD5	-0.0391503	0.648438
86	ABHD6	0.118815	0.556149
87	ABHD8	-0.0399306	0.857814
88	ABI1	0.104277	1.25113
89	ABI2	-0.0434857	0.731591
90	ABI3	0.254909	0.936355
91	ABI3BP	0.326067	0.938201
92	ABITRAM	0.219502	1.18415
93	ABL1	-0.10828	1.29852
94	ABL2	0.0223682	0.573418
95	ABLIM1	0.034733	1.15916
96	ABLIM2	0.218327	0.433586
97	ABLIM3	-0.0466036	0.94583
98	ABO	0.412913	0.690866
99	ABR	0.0139505	0.950715
100	ABRACL	0.190505	1.46161
101	ABRAXAS1	-0.203551	0.413294
102	ABRAXAS2	0.255448	1.02962
103	ABT1	-0.0644271	1.10589
104	ABTB1	-0.0462011	1.13754
105	ABTB2	-0.169374	0.756975
106	ACAA1	0.506918	1.06252
107	ACAA2	0.152176	1.01396
108	ACACA	0.435641	1.60598
109	ACACB	0.435795	0.598971
110	ACAD10	0.292779	0.854114
111	ACAD11	-0.262542	0.114459
112	ACAD8	0.166791	1.60013
113	ACAD9	-0.00258463	1.13737
114	ACADL	0.353167	1.18134
115	ACADM	-0.0215041	1.30266
116	ACADS	0.215125	1.34288
117	ACADSB	0.147206	1.43866
118	ACADVL	0.244714	2.11614
119	ACAN	-0.1124	0.423637
120	ACAP1	0.454483	0.727856
121	ACAP2	-0.0916122	0.768005
122	ACAP3	-0.0268302	0.732421
123	ACAT1	0.0403099	1.37939
124	ACAT2	0.157817	1.39407
125	ACBD3	0.181609	1.23913
126	ACBD4	-0.109902	0.897452
127	ACBD5	0.21611	0.845211
128	ACBD6	0.145376	1.02324
129	ACBD7	0.251312	0.321443
130	ACCS	0.0919948	0.970123
131	ACD	-0.194663	0.915627
132	ACE	0.346054	0.708532
133	ACE2	0.225456	0.0970442
134	ACER2	0.013664	0.839099
135	ACER3	0.290922	0.895615
136	ACHE	-0.00814335	0.799092
137	ACIN1	0.0212157	1.13318
138	ACKR1	0.121531	1.65386
139	ACKR2	-0.132324	0.34412
140	ACKR3	0.371357	0.982918
141	ACKR4	0.13861	0.0797277
142	ACLY	0.37803	1.95171
143	ACMSD	0.0574772	0.0529462
144	ACO1	0.337594	0.948726
145	ACO2	0.404437	0.894148
146	ACOT1	0.184205	0.586855
147	ACOT11	0.366082	0.317159
148	ACOT13	0.171195	0.929386
149	ACOT2	0.270675	0.9613
150	ACOT4	-0.012631	0.432584
151	ACOT7	-0.00111479	1.04876
152	ACOT8	0.429553	0.773004
153	ACOT9	0.034164	0.921762
154	ACOX1	0.265426	1.26634
155	ACOX2	0.326873	0.809469
156	ACOX3	0.380729	0.887433
157	ACOXL	0.239082	0.486033
158	ACP1	0.198078	1.46585
159	ACP2	0.523727	1.58275
160	ACP3	0.538972	2.66288
161	ACP4	0.0313847	0.427449
162	ACP5	0.364176	1.18462
163	ACP6	0.296944	0.809076
164	ACP7	0.428072	0.106301
165	ACR	0.117793	0.107299
166	ACRBP	0.315097	0.409143
167	ACRV1	0.272654	0.284061
168	ACSBG1	0.284368	0.223551
169	ACSBG2	-0.126017	0.0711827
170	ACSF2	0.497143	0.81539
171	ACSF3	0.0196159	0.522728
172	ACSL1	0.184664	1.72334
173	ACSL3	0.538039	1.89273
174	ACSL4	0.670955	0.796721
175	ACSL5	-0.0529325	2.20708
176	ACSL6	0.162183	0.142552
177	ACSM1	0.405512	2.14639
178	ACSM3	0.415455	1.44511
179	ACSM4	0.197297	0.0476772
180	ACSM5	-0.159885	0.165913
181	ACSS1	0.383827	1.45485
182	ACSS2	0.251318	0.985902
183	ACSS3	0.590991	0.456469
184	ACTA1	0.430095	1.65418
185	ACTA2	0.479854	2.40257
186	ACTB	0.0657333	2.8646
187	ACTC1	0.496846	1.3437
188	ACTG1	-0.110786	3.02345
189	ACTG2	0.516112	2.72392
190	ACTL6A	0.181399	1.21143
191	ACTN1	0.402419	1.8734
192	ACTN2	0.226556	0.939391
193	ACTN3	0.00700232	0.0847602
194	ACTN4	0.0616236	1.83083
195	ACTR10	0.225598	1.14597
196	ACTR1A	-0.0137918	1.75802
197	ACTR1B	0.145198	1.42524
198	ACTR2	-0.154453	1.59802
199	ACTR3	0.0676788	1.23725
200	ACTR3B	0.154944	0.496892
201	ACTR3C	0.151951	0.352863
202	ACTR5	0.0347023	0.683886
203	ACTR6	0.239003	0.710844
204	ACTR8	-0.00365574	0.622567
205	ACTRT3	0.121616	0.27995
206	ACVR1	0.0218309	0.840877
207	ACVR1B	0.17214	1.16258
208	ACVR1C	-0.00348636	0.124461
209	ACVR2A	-0.0637072	0.810053
210	ACVR2B	0.233445	0.441625
211	ACVRL1	0.362486	0.966938
212	ACY1	0.0204953	0.139924
213	ACY3	0.00815985	0.825231
214	ACYP1	-0.0780128	0.636819
215	ACYP2	0.114109	0.80879
216	ADA	0.305442	0.47067
217	ADA2	0.443072	0.998028
218	ADAD2	0.0942611	0.125078
219	ADAM10	0.235607	1.05711
220	ADAM11	0.019513	0.353773
221	ADAM12	-0.0049045	0.252308
222	ADAM15	-0.0133297	1.59948
223	ADAM17	-0.0177744	0.50131
224	ADAM19	0.533076	0.696573
225	ADAM20	-0.0277601	0.0989978
226	ADAM21	0.226068	0.391634
227	ADAM22	0.352525	0.849118
228	ADAM23	0.220578	0.297679
229	ADAM28	0.349241	0.530776
230	ADAM32	-0.192962	0.24628
231	ADAM33	0.506267	0.950349
232	ADAM8	-0.0341076	0.642282
233	ADAM9	0.166189	1.21103
234	ADAMDEC1	0.125533	0.806733
235	ADAMTS1	0.589538	1.33763
236	ADAMTS10	0.47127	0.701327
237	ADAMTS12	0.140636	0.308116
238	ADAMTS13	0.120817	0.485419
239	ADAMTS14	0.305203	0.176899
240	ADAMTS15	0.416699	0.289903
241	ADAMTS16	0.0835971	0.158068
242	ADAMTS17	-0.0177533	0.193858
243	ADAMTS18	-0.0294029	0.134345
244	ADAMTS2	0.389941	1.11259
245	ADAMTS3	-0.0340218	0.668144
246	ADAMTS4	0.213938	0.926636
247	ADAMTS5	0.506552	0.546343
248	ADAMTS6	0.0548437	0.245614
249	ADAMTS7	-0.228242	0.323154
250	ADAMTS8	0.634565	0.63924
251	ADAMTS9	0.394151	0.513745
252	ADAMTSL1	0.200713	1.05503
253	ADAMTSL2	0.303316	0.950628
254	ADAMTSL3	0.31248	0.73609
255	ADAMTSL4	0.515487	0.544302
256	ADAMTSL5	0.258802	0.425337
257	ADAP1	0.0390771	0.372854
258	ADAP2	0.0169143	0.693428
259	ADAR	-0.116622	1.54992
260	ADARB1	0.214155	0.791398
261	ADARB2	0.439818	0.669784
262	ADAT1	0.056634	0.592324
263	ADAT2	-0.0967912	0.505537
264	ADAT3	-0.0698559	0.47949
265	ADCK1	-0.0399735	0.5752
266	ADCK2	0.107913	1.17151
267	ADCK5	-0.0877024	0.797949
268	ADCY1	0.137974	0.976634
269	ADCY10	-0.0679374	0.144988
270	ADCY2	0.30049	0.502922
271	ADCY3	0.414401	0.749409
272	ADCY4	0.22803	0.672534
273	ADCY5	0.533818	1.11965
274	ADCY6	0.407794	0.742619
275	ADCY7	0.365805	0.40247
276	ADCY9	0.285885	0.525903
277	ADCYAP1	0.220387	0.271692
278	ADCYAP1R1	0.260933	0.254127
279	ADD1	0.123061	1.59529
280	ADD2	0.255138	0.442558
281	ADD3	0.199471	1.42242
282	ADGRA2	0.475337	1.62866
283	ADGRA3	0.0831606	0.828451
284	ADGRB1	0.207399	0.416481
285	ADGRB2	0.0126474	0.466587
286	ADGRB3	0.290384	0.171186
287	ADGRD1	0.390961	0.586821
288	ADGRE1	0.152901	0.173142
289	ADGRE2	0.237413	0.341922
290	ADGRE3	0.0774745	0.155899
291	ADGRE5	0.140161	1.17846
292	ADGRF1	0.256426	1.26784
293	ADGRF3	-0.231039	0.0931596
294	ADGRF5	0.322566	1.75912
295	ADGRG1	0.115721	0.90303
296	ADGRG2	0.280669	0.54366
297	ADGRG3	0.126742	0.139409
298	ADGRG5	0.377475	0.285149
299	ADGRG6	0.44134	0.620407
300	ADGRL1	0.298682	0.780601
301	ADGRL2	0.36003	0.865611
302	ADGRL3	0.469846	0.177051
303	ADGRL4	0.228925	0.926668
304	ADGRV1	0.0409381	0.347663
305	ADH1B	-0.092825	0.481766
306	ADH1C	-0.127813	1.15629
307	ADH5	0.323976	1.76354
308	ADH6	0.108276	0.239116
309	ADHFE1	0.0726532	0.767574
310	ADI1	0.410789	1.84452
311	ADIPOR1	0.413981	1.6276
312	ADIPOR2	0.101589	1.35564
313	ADK	0.148754	0.944423
314	ADM	0.00177816	0.992262
315	ADM2	0.372476	1.45376
316	ADM5	0.0910241	0.445187
317	ADNP	0.139318	1.14215
318	ADNP2	-0.0798548	0.797223
319	ADO	-0.195107	0.929081
320	ADORA1	0.235078	0.185654
321	ADORA2A	-0.091693	0.137457
322	ADORA2B	0.265223	0.394663
323	ADORA3	0.13535	0.542367
324	ADPGK	0.296213	1.39275
325	ADPRH	0.156284	0.831587
326	ADPRHL1	-0.102026	0.633618
327	ADPRM	0.0923063	1.5567
328	ADPRS	0.315872	1.37002
329	ADRA1A	0.619447	0.449513
330	ADRA1B	0.28127	0.12371
331	ADRA1D	0.377066	0.616101
332	ADRA2A	0.342385	1.5068
333	ADRA2B	0.0529462	0.251698
334	ADRA2C	0.100806	0.978077
335	ADRB1	0.29932	1.41387
336	ADRB2	-0.0562718	1.2458
337	ADRM1	0.180979	1.20697
338	ADSL	0.354401	0.283713
339	ADSS1	-0.0338378	0.488104
340	ADSS2	0.167024	1.14055
341	ADTRP	-0.0211904	0.411835
342	AEBP1	0.276754	2.58803
343	AEBP2	0.0758541	0.843861
344	AEN	-0.197188	1.06153
345	AFAP1	0.00821439	0.362309
346	AFAP1L1	0.392457	0.632276
347	AFAP1L2	0.330071	0.705717
348	AFDN	-0.150174	1.23548
349	AFF1	0.236603	1.6011
350	AFF2	0.47964	0.139977
351	AFF3	0.205181	1.47794
352	AFF4	0.104668	1.04764
353	AFG1L	-0.100783	0.322243
354	AFG3L2	0.192696	1.11806
355	AFMID	0.48016	1.06461
356	AFTPH	0.297172	1.37708
357	AGA	0.459141	1.18493
358	AGAP1	0.157929	0.783403
359	AGAP2	0.0904972	0.379968
360	AGAP3	-0.105669	1.0266
361	AGAP4	-0.0720317	0.376545
362	AGAP5	-0.0183	0.0984804
363	AGAP6	0.0019345	0.16398
364	AGAP9	-0.0401579	0.478044
365	AGBL2	0.0515198	0.206937
366	AGBL3	0.0943337	0.263837
367	AGBL4	0.0952589	0.124893
368	AGBL5	0.259461	0.980712
369	AGER	-0.0570401	0.617136
370	AGFG1	0.0179893	0.825829
371	AGFG2	0.246066	1.28873
372	AGGF1	0.118401	0.685369
373	AGK	0.377239	0.654718
374	AGL	0.0787137	0.896693
375	AGMAT	0.375696	0.696884
376	AGMO	0.0510085	0.274923
377	AGO1	0.134281	0.73009
378	AGO2	0.12146	0.636487
379	AGO3	0.0681477	0.38828
380	AGO4	0.197129	0.643855
381	AGPAT1	0.183375	1.09616
382	AGPAT2	0.0203513	1.68262
383	AGPAT3	0.0954141	1.10414
384	AGPAT4	0.401959	0.345412
385	AGPAT5	0.0582208	1.02158
386	AGPS	0.0574888	0.676148
387	AGR2	0.0675016	2.76186
388	AGRN	0.0347233	1.28619
389	AGRP	0.0520661	0.130848
390	AGT	0.213036	1.97544
391	AGTPBP1	-0.0383598	0.743671
392	AGTR1	0.0518802	1.65331
393	AGTRAP	0.484269	1.7044
394	AHCTF1	0.0760902	0.743303
395	AHCY	0.510863	1.75563
396	AHCYL1	0.266406	1.35135
397	AHCYL2	0.271569	0.677156
398	AHDC1	0.303518	0.75216
399	AHI1	0.219946	0.742566
400	AHNAK	0.297299	1.80514
401	AHNAK2	0.594105	0.648673
402	AHR	0.299573	0.833654
403	AHRR	-0.0458586	0.0938404
404	AHSA1	0.115792	1.66134
405	AIDA	0.235594	0.98865
406	AIF1	0.339612	1.26003
407	AIF1L	0.258975	1.02357
408	AIFM1	0.434645	0.824411
409	AIFM2	0.254727	0.573261
410	AIFM3	0.151206	0.185396
411	AIG1	0.277585	1.08937
412	AIM2	0.468771	0.488859
413	AIMP1	-0.104754	1.01564
414	AIMP2	0.228705	1.08361
415	AIP	-0.0326984	1.81107
416	AIRE	0.0799506	0.0673205
417	AJAP1	0.340892	0.243662
418	AJM1	0.293143	0.609272
419	AJUBA	0.338123	0.795126
420	AK1	-0.091088	0.418928
421	AK2	0.110618	1.32566
422	AK3	0.218821	1.45157
423	AK4	0.415626	1.05584
424	AK5	-0.0818375	0.996853
425	AK6	-0.0453722	1.2554
426	AK7	0.102926	0.337959
427	AK8	0.155225	0.326767
428	AK9	0.301365	0.329856
429	AKAP1	0.147063	1.35269
430	AKAP10	-0.00719185	0.845058
431	AKAP11	0.119037	0.880508
432	AKAP12	0.609328	1.19685
433	AKAP13	0.0773272	0.908708
434	AKAP17A	0.23451	1.25893
435	AKAP3	0.216993	0.299027
436	AKAP5	0.108677	0.345717
437	AKAP6	0.303723	0.231099
438	AKAP7	0.293713	1.01228
439	AKAP8	-0.0435224	0.813581
440	AKAP8L	-0.0625703	0.903163
441	AKAP9	0.00185984	0.919507
442	AKIP1	-0.108722	0.693182
443	AKIRIN1	0.2339	1.11707
444	AKIRIN2	0.167195	1.04813
445	AKNA	0.283602	0.859005
446	AKR1A1	0.424753	1.86363
447	AKR1B1	0.246051	1.18791
448	AKR1B10	-0.028676	0.243869
449	AKR1B15	0.0531731	0.0728661
450	AKR1C1	0.0437112	0.578595
451	AKR1C2	-0.0156092	0.388434
452	AKR1C3	-0.0290112	1.02439
453	AKR1E2	-0.0929976	0.408013
454	AKR7A2	0.382967	1.39557
455	AKR7A3	0.170373	0.479751
456	AKT1	0.036337	1.36465
457	AKT1S1	0.40999	1.26478
458	AKT2	-0.194134	0.994894
459	AKT3	-0.143975	1.21911
460	AKTIP	-0.0118185	0.802396
461	ALAD	0.385124	0.952345
462	ALAS1	0.260549	1.15574
463	ALAS2	0.0319961	0.086687
464	ALB	0.333053	1.05145
465	ALCAM	0.0265554	1.78817
466	ALDH16A1	-0.157203	0.924833
467	ALDH18A1	0.184592	1.63546
468	ALDH1A1	0.0163542	2.67332
469	ALDH1A2	0.657902	0.675177
470	ALDH1A3	0.224657	2.41605
471	ALDH1B1	0.126861	1.53795
472	ALDH1L1	0.14051	0.753697
473	ALDH1L2	0.508784	0.315626
474	ALDH2	0.47845	1.17141
475	ALDH3A1	0.191324	0.285362
476	ALDH3A2	0.251876	1.17405
477	ALDH3B1	0.218766	0.441597
478	ALDH4A1	0.463876	1.35044
479	ALDH5A1	0.13119	0.734644
480	ALDH6A1	0.276439	1.48057
481	ALDH7A1	0.208149	0.985839
482	ALDH8A1	-0.187764	0.181034
483	ALDH9A1	0.368916	1.51896
484	ALDOA	0.13981	0.452365
485	ALDOB	0.258161	0.114677
486	ALDOC	0.244058	0.89041
487	ALG1	0.272763	0.732641
488	ALG10	-0.0203154	0.289136
489	ALG10B	-0.119322	0.45622
490	ALG11	0.0161671	0.314795
491	ALG12	0.28633	0.874853
492	ALG13	0.107723	0.751512
493	ALG14	0.20924	0.570794
494	ALG1L2	0.109355	0.205548
495	ALG2	0.39868	1.13018
496	ALG3	0.224873	1.43339
497	ALG5	0.296638	1.40691
498	ALG6	0.297392	0.65534
499	ALG8	0.302165	1.2724
500	ALG9	0.0347055	0.399116
501	ALK	-0.10253	0.0551534
502	ALKAL2	0.284498	0.262859
503	ALKBH1	-0.0737192	0.651217
504	ALKBH2	0.265871	1.30406
505	ALKBH3	0.298717	1.02937
506	ALKBH4	0.125813	0.981925
507	ALKBH5	0.0464836	1.4776
508	ALKBH6	-0.259046	0.267552
509	ALKBH7	0.298426	1.94858
510	ALKBH8	-0.108872	0.603954
511	ALMS1	0.0392035	0.669671
512	ALOX12	-0.0805503	0.190421
513	ALOX15	0.343918	1.14288
514	ALOX15B	0.4036	2.62257
515	ALOX5	0.0460244	1.1084
516	ALOX5AP	0.218518	1.03081
517	ALPK1	0.213246	0.594074
518	ALPK2	0.182984	0.0950889
519	ALPK3	0.136251	0.686171
520	ALPL	-0.017406	1.0525
521	ALS2	0.0777989	0.551198
522	ALS2CL	0.102798	0.573617
523	ALX4	0.352891	0.351015
524	ALYREF	0.216701	1.55434
525	AMACR	0.0505029	1.44487
526	AMBP	-0.0705053	0.327347
527	AMBRA1	-0.104818	0.786829
528	AMD1	0.219488	1.62415
529	AMDHD1	0.0409071	0.119897
530	AMDHD2	-0.114822	0.750406
531	AMER1	-0.119835	0.465129
532	AMFR	0.0913107	1.07013
533	AMH	0.320009	0.748413
534	AMHR2	0.170121	0.131063
535	AMIGO1	0.0704423	1.0637
536	AMIGO2	0.186489	0.844925
537	AMMECR1	0.368369	0.646411
538	AMMECR1L	-0.0445587	0.851184
539	AMN	0.0851996	0.211373
540	AMN1	-0.00350181	0.411541
541	AMOT	0.4111	0.794528
542	AMOTL1	0.0440247	1.30385
543	AMOTL2	0.388338	1.06944
544	AMPD2	-0.0517231	1.02839
545	AMPD3	0.279071	0.950903
546	AMPH	0.383769	0.252681
547	AMT	-0.047697	0.086349
548	AMY2B	0.0117982	0.471925
549	AMZ1	-0.0463162	0.06813
550	AMZ2	0.191445	1.2175
551	ANAPC1	0.0428581	0.405784
552	ANAPC10	-0.0649103	0.323301
553	ANAPC11	0.285921	1.43331
554	ANAPC13	0.0998661	1.60026
555	ANAPC15	0.340292	0.640327
556	ANAPC16	0.33756	1.62756
557	ANAPC2	-0.0684596	1.10565
558	ANAPC4	0.131721	0.690051
559	ANAPC5	0.325296	1.05844
560	ANAPC7	0.00340536	0.958956
561	ANG	0.492365	1.29866
562	ANGEL1	0.179037	0.553744
563	ANGEL2	-0.209949	0.798496
564	ANGPT1	0.488742	0.80092
565	ANGPT2	0.11834	0.626992
566	ANGPT4	0.167755	0.139361
567	ANGPTL1	0.518062	0.609947
568	ANGPTL2	0.315194	1.54691
569	ANGPTL3	0.345383	0.739061
570	ANGPTL4	0.35777	1.06327
571	ANGPTL6	0.196979	0.125074
572	ANGPTL8	0.0694999	0.124013
573	ANK1	0.124088	0.479326
574	ANK2	0.446685	0.356313
575	ANK3	0.354249	0.792482
576	ANKAR	-0.187889	0.405765
577	ANKDD1A	0.240927	0.459257
578	ANKDD1B	0.385406	0.266789
579	ANKEF1	0.372023	0.420951
580	ANKFN1	0.0221249	0.10349
581	ANKFY1	0.155559	0.679413
582	ANKH	0.00084156	1.3692
583	ANKHD1	0.0492872	0.212086
584	ANKIB1	-0.161461	1.10861
585	ANKK1	0.0390725	0.412963
586	ANKLE1	0.0925977	0.163053
587	ANKLE2	-0.019001	0.764523
588	ANKMY1	-0.109716	0.427158
589	ANKMY2	0.0897251	0.729228
590	ANKRA2	0.11177	0.932337
591	ANKRD1	0.178856	0.99552
592	ANKRD10	0.044228	1.21051
593	ANKRD11	-0.0375542	0.83022
594	ANKRD12	0.070406	0.791359
595	ANKRD13A	0.129989	0.987042
596	ANKRD13B	0.353539	0.769496
597	ANKRD13C	0.153171	0.896915
598	ANKRD13D	-0.327022	0.861564
599	ANKRD16	0.343321	0.785849
600	ANKRD17	-0.0417801	1.14252
601	ANKRD18A	0.0338537	0.292421
602	ANKRD18B	-0.0315837	0.353172
603	ANKRD2	0.178871	0.41869
604	ANKRD22	0.184018	0.982054
605	ANKRD23	0.122695	0.261238
606	ANKRD24	0.166362	0.62168
607	ANKRD26	-0.141632	0.350375
608	ANKRD27	0.0279688	0.873454
609	ANKRD28	0.210473	0.751627
610	ANKRD29	0.150892	1.19474
611	ANKRD31	-0.0202797	0.07681
612	ANKRD33B	0.327834	0.343913
613	ANKRD34A	0.0927443	0.425059
614	ANKRD35	0.463352	0.617467
615	ANKRD36	-0.0404751	0.295661
616	ANKRD36B	-0.208517	0.279965
617	ANKRD36C	-0.0826298	0.37068
618	ANKRD37	0.239218	0.906227
619	ANKRD39	0.0686231	0.501574
620	ANKRD40	0.0403286	1.1471
621	ANKRD42	0.120865	0.522965
622	ANKRD44	0.408976	0.540555
623	ANKRD45	0.0713428	0.0846992
624	ANKRD46	0.143578	0.719036
625	ANKRD49	-0.204958	0.859392
626	ANKRD50	0.146133	1.1634
627	ANKRD52	-0.21091	0.781828
628	ANKRD53	0.161521	0.236262
629	ANKRD54	0.173258	1.02442
630	ANKRD55	-0.110544	0.100928
631	ANKRD6	0.106597	0.473408
632	ANKRD61	-0.0422904	0.230191
633	ANKRD65	0.307394	0.893709
634	ANKRD9	0.00860331	0.723418
635	ANKS1A	0.232822	0.748151
636	ANKS1B	0.228073	0.209034
637	ANKS3	0.336222	0.860638
638	ANKS6	-0.052428	0.756778
639	ANKZF1	0.417217	1.03075
640	ANLN	0.208625	0.537563
641	ANO1	0.411783	1.02347
642	ANO10	-0.237238	0.913244
643	ANO2	0.319323	0.283334
644	ANO3	-0.106559	0.191458
645	ANO4	0.431944	0.674549
646	ANO5	0.327736	0.787026
647	ANO6	0.409737	1.28409
648	ANO7	0.264091	1.73792
649	ANO8	-0.178343	0.590952
650	ANO9	0.0374087	0.648724
651	ANOS1	0.096169	0.763104
652	ANP32A	0.143286	1.55362
653	ANP32B	0.0372231	2.02401
654	ANP32E	0.463941	0.852509
655	ANPEP	0.452661	2.53805
656	ANTKMT	0.0855511	1.17328
657	ANTXR1	0.367483	1.40126
658	ANTXR2	0.340416	1.47177
659	ANXA1	0.37856	1.61315
660	ANXA10	-0.245248	0.220483
661	ANXA11	0.126753	1.71485
662	ANXA13	0.0119968	0.241515
663	ANXA2	0.415739	1.32529
664	ANXA2R	-0.226354	0.962835
665	ANXA3	0.320353	1.67072
666	ANXA4	0.120997	0.967769
667	ANXA5	0.299997	2.15799
668	ANXA6	0.381219	1.72137
669	ANXA7	0.32445	1.6156
670	ANXA8	0.106933	0.492041
671	ANXA9	-0.145771	0.737401
672	AOAH	0.327209	0.715221
673	AOC1	0.383954	1.66429
674	AOC2	-0.320517	0.398827
675	AOC3	0.475378	1.37016
676	AOPEP	0.42128	0.698145
677	AOX1	0.5841	0.881204
678	AP1AR	0.138753	0.712786
679	AP1B1	0.45501	1.66253
680	AP1G1	0.335343	1.00157
681	AP1G2	-0.242118	0.717435
682	AP1M1	-0.152483	0.627749
683	AP1M2	0.480421	1.82665
684	AP1S1	0.404336	1.6669
685	AP1S2	-0.0871941	0.882691
686	AP1S3	0.272069	0.558214
687	AP2A1	-0.148107	1.10028
688	AP2A2	0.011431	1.18463
689	AP2B1	0.0526821	1.40992
690	AP2M1	0.0540641	2.11495
691	AP2S1	0.268496	1.69486
692	AP3B1	0.348886	1.21173
693	AP3B2	-0.0547847	0.286362
694	AP3D1	0.0609305	1.26017
695	AP3M1	0.0598587	1.06612
696	AP3M2	0.155756	0.792553
697	AP3S1	-0.050813	1.25625
698	AP3S2	0.0980923	0.727691
699	AP4B1	-0.259799	0.537344
700	AP4E1	0.054813	0.394461
701	AP4M1	0.3014	0.927674
702	AP4S1	0.397939	0.265594
703	AP5B1	-0.06403	0.51952
704	AP5M1	-0.0478942	0.654775
705	AP5S1	0.222673	0.512569
706	AP5Z1	-0.0707367	1.092
707	APAF1	-0.183874	0.518383
708	APBA1	0.153331	0.473312
709	APBA2	0.491452	0.93025
710	APBA3	-0.196197	0.727323
711	APBB1	0.355332	0.926948
712	APBB1IP	0.308314	0.780891
713	APBB2	0.1162	0.583635
714	APBB3	0.0329152	0.731256
715	APC	0.334422	0.673832
716	APC2	-0.0895871	0.185499
717	APCDD1	0.217307	1.61585
718	APCDD1L	0.23999	0.117977
719	APEH	0.316903	1.54673
720	APEX1	0.26961	2.06426
721	APEX2	0.260869	0.966893
722	APH1A	0.000734612	1.66407
723	APH1B	0.284777	1.06408
724	API5	0.206135	1.31155
725	APIP	-0.0496652	0.885618
726	APLF	0.555484	0.191557
727	APLN	0.358707	1.01912
728	APLNR	0.00681013	0.850735
729	APLP1	-0.150218	0.68011
730	APLP2	0.466907	2.271
731	APMAP	0.337269	2.13764
732	APOA1	-0.138929	0.320921
733	APOB	0.284291	0.10258
734	APOBEC2	-0.0330154	0.489053
735	APOBEC3A	-0.0440422	0.213055
736	APOBEC3B	-0.0550691	0.322429
737	APOBEC3C	0.52307	1.13921
738	APOBEC3D	0.147532	0.108219
739	APOBEC3F	0.375051	0.517372
740	APOBEC3G	0.492612	0.624956
741	APOBEC3H	0.31342	0.336213
742	APOBR	0.0597581	0.639608
743	APOC1	0.020073	1.45175
744	APOD	0.139259	2.77168
745	APOE	-0.0495932	2.34097
746	APOF	0.272392	1.4637
747	APOL1	0.444526	1.71528
748	APOL2	0.137811	1.44742
749	APOL3	0.260272	1.47298
750	APOL4	0.083444	1.4568
751	APOL6	0.461854	1.21339
752	APOLD1	0.220835	1.23379
753	APOM	-0.0571828	0.493785
754	APOO	0.222806	0.933628
755	APOOL	0.0967726	0.880403
756	APP	0.0372385	2.32688
757	APPBP2	-0.0136875	0.952748
758	APPL1	-0.0923361	1.07216
759	APPL2	0.338444	1.32394
760	APRT	0.427937	2.2468
761	APTR	0.112773	0.455741
762	APTX	0.382664	0.487962
763	AQP1	0.16925	1.95981
764	AQP11	0.15071	0.844653
765	AQP3	0.271237	1.62908
766	AQP5	0.256837	0.375731
767	AQP6	-0.0926045	0.140405
768	AQP7	0.11327	0.163016
769	AQP8	0.0152115	0.198167
770	AQP9	0.210895	0.294892
771	AQR	-0.0378075	0.87808
772	AR	-0.00917825	1.3333
773	ARAF	0.278339	1.30761
774	ARAP1	0.000841253	0.91703
775	ARAP2	-0.11335	0.55941
776	ARAP3	0.0382234	0.799195
777	ARC	0.318138	0.394446
778	ARCN1	0.180894	1.81489
779	AREG	0.185054	0.950512
780	AREL1	0.217101	1.00971
781	ARF1	0.431748	2.45255
782	ARF3	0.300344	1.61122
783	ARF4	0.28627	1.88765
784	ARF5	0.194643	1.81953
785	ARF6	0.47127	1.7542
786	ARFGAP1	-0.14945	1.03244
787	ARFGAP2	0.25772	1.16542
788	ARFGAP3	0.535541	1.78
789	ARFGEF1	0.228059	0.946547
790	ARFGEF2	0.350045	1.01499
791	ARFGEF3	0.476087	1.43293
792	ARFIP1	0.0442866	1.01776
793	ARFIP2	0.565203	1.43371
794	ARFRP1	-0.180284	1.06006
795	ARG1	0.143935	0.27457
796	ARG2	0.393122	1.56091
797	ARGLU1	0.0945462	1.05071
798	ARHGAP1	0.145957	1.44294
799	ARHGAP10	0.434861	0.93786
800	ARHGAP11A	0.292377	0.352224
801	ARHGAP11B	-0.0182956	0.0970886
802	ARHGAP12	-0.0263433	1.19033
803	ARHGAP15	0.423418	0.544132
804	ARHGAP17	-0.0576606	0.688515
805	ARHGAP18	0.228007	0.992305
806	ARHGAP19	0.11898	0.517303
807	ARHGAP20	0.38386	0.424498
808	ARHGAP21	-0.0605593	0.794371
809	ARHGAP22	0.0654526	0.295472
810	ARHGAP23	0.53001	0.678031
811	ARHGAP24	0.354029	0.34434
812	ARHGAP25	0.323589	0.644658
813	ARHGAP26	-0.0108447	0.633288
814	ARHGAP27	-0.15613	0.520135
815	ARHGAP28	0.118999	0.813274
816	ARHGAP29	-0.0217925	1.02331
817	ARHGAP30	0.23331	0.793796
818	ARHGAP31	0.292661	0.713385
819	ARHGAP32	0.193231	0.962964
820	ARHGAP33	0.164076	0.518338
821	ARHGAP35	-0.102799	1.01488
822	ARHGAP39	0.0976003	0.593472
823	ARHGAP4	0.261871	0.80551
824	ARHGAP40	0.074701	0.638342
825	ARHGAP42	-0.0054146	0.486825
826	ARHGAP44	0.0885237	0.55645
827	ARHGAP45	0.0600105	1.0681
828	ARHGAP5	0.0570982	0.745122
829	ARHGAP6	0.0232101	1.48661
830	ARHGAP8	0.0486685	0.321835
831	ARHGAP9	0.367925	0.601546
832	ARHGDIA	0.311514	1.80521
833	ARHGDIB	0.165786	2.2275
834	ARHGDIG	0.37679	0.871944
835	ARHGEF1	-0.266032	1.03089
836	ARHGEF10	-0.0578296	0.151884
837	ARHGEF10L	-0.00764788	0.73609
838	ARHGEF11	-0.124933	0.750064
839	ARHGEF12	0.231203	1.10873
840	ARHGEF15	0.207677	0.610127
841	ARHGEF16	0.362291	0.959335
842	ARHGEF17	0.202522	0.806513
843	ARHGEF18	-0.210367	0.514112
844	ARHGEF19	0.00829104	0.68102
845	ARHGEF2	0.318963	0.700599
846	ARHGEF25	0.494792	0.686004
847	ARHGEF26	0.271319	1.51035
848	ARHGEF28	0.377352	0.395646
849	ARHGEF3	-0.0326845	1.00698
850	ARHGEF33	-0.0461673	0.147312
851	ARHGEF35	0.0131983	0.870777
852	ARHGEF37	0.236654	1.32548
853	ARHGEF38	0.303925	0.976188
854	ARHGEF39	-0.139333	0.252788
855	ARHGEF4	-0.0779604	0.513231
856	ARHGEF40	0.30985	0.773142
857	ARHGEF5	-0.109294	0.570997
858	ARHGEF6	0.25034	0.974423
859	ARHGEF7	0.133138	0.902003
860	ARHGEF9	0.0581981	0.48753
861	ARID1A	-0.008497	0.980553
862	ARID1B	-0.168093	0.693128
863	ARID2	0.0563202	0.69472
864	ARID3A	0.0101339	0.574336
865	ARID3B	-0.0469379	0.425797
866	ARID3C	-0.229792	0.15646
867	ARID4A	0.0219353	0.688511
868	ARID4B	0.0876384	0.969405
869	ARID5A	0.273644	1.03385
870	ARID5B	0.0866471	1.33915
871	ARIH1	-0.16957	0.539955
872	ARIH2	-0.223465	0.738882
873	ARL1	0.421167	1.51443
874	ARL10	0.29353	0.350959
875	ARL11	0.23021	0.224895
876	ARL13A	0.0762355	0.0798697
877	ARL13B	-0.0199806	0.700263
878	ARL14EP	-0.237265	0.913566
879	ARL15	-0.0832079	1.04981
880	ARL16	-0.0495158	1.12458
881	ARL17A	-0.0826553	0.162455
882	ARL17B	-0.0884824	0.155334
883	ARL2	-0.0844511	1.37399
884	ARL2BP	0.177185	0.268486
885	ARL3	-0.124655	1.08244
886	ARL4A	0.0937308	1.06132
887	ARL4C	0.575506	0.853414
888	ARL4D	0.470289	0.902996
889	ARL5A	0.227556	0.854739
890	ARL5B	-0.0598603	0.579354
891	ARL6	-0.247085	0.559638
892	ARL6IP1	0.227259	1.6916
893	ARL6IP4	0.0126872	0.175947
894	ARL6IP5	0.18713	2.02458
895	ARL6IP6	0.0776031	0.510814
896	ARL8A	0.206375	1.46343
897	ARL8B	0.0563439	1.42102
898	ARL9	-0.200101	0.445607
899	ARMC1	-0.32349	1.28677
900	ARMC10	-0.0109342	1.11225
901	ARMC12	0.157481	0.463724
902	ARMC2	0.243625	0.269642
903	ARMC5	0.0617787	0.780375
904	ARMC6	0.420179	1.33433
905	ARMC7	0.0782497	0.93177
906	ARMC8	-0.00303118	0.650976
907	ARMC9	-0.199361	0.453453
908	ARMCX1	0.619926	0.999586
909	ARMCX2	0.423658	1.35877
910	ARMCX3	0.213224	1.26507
911	ARMCX4	0.287701	0.512074
912	ARMCX5	0.185868	0.718615
913	ARMCX6	0.297185	0.808218
914	ARMH1	0.194204	0.439798
915	ARMH3	-0.0842643	1.00209
916	ARMH4	0.179465	0.30957
917	ARMT1	-0.025136	1.01342
918	ARNT	0.0582979	1.02493
919	ARNT2	0.0195293	0.778105
920	ARPC1A	0.0193078	1.13754
921	ARPC1B	0.0658192	0.173546
922	ARPC2	0.0532294	1.4564
923	ARPC3	0.288909	1.87068
924	ARPC4	-0.0737102	1.46462
925	ARPC5	0.0897181	1.06147
926	ARPC5L	0.113991	1.08164
927	ARPIN	0.164096	1.07041
928	ARPP19	-0.00884145	1.39903
929	ARR3	-0.123523	0.180311
930	ARRB1	0.225042	0.810338
931	ARRB2	-0.0445319	1.13408
932	ARRDC1	0.0556173	1.33081
933	ARRDC2	0.233384	1.14948
934	ARRDC3	0.248367	1.36973
935	ARRDC4	-0.0590866	0.692922
936	ARRDC5	0.0923157	0.199369
937	ARSA	0.346497	1.25909
938	ARSB	0.163425	0.635604
939	ARSD	0.397913	1.40585
940	ARSG	0.25203	0.39261
941	ARSI	0.270992	0.374978
942	ARSJ	0.504028	0.609591
943	ARSK	0.121642	0.924476
944	ARSL	-0.195319	0.266069
945	ART3	0.0485792	0.377375
946	ART4	0.122932	0.554081
947	ART5	0.233733	0.35355
948	ARTN	-0.060366	0.455173
949	ARV1	0.229773	1.17775
950	ARVCF	0.488135	1.01653
951	ASAH1	0.0233043	1.23683
952	ASAH2	0.14808	0.106916
953	ASAH2B	0.0394198	0.497559
954	ASAP1	0.297969	0.73715
955	ASAP2	0.198702	0.631137
956	ASAP3	0.167154	1.21239
957	ASB1	0.281415	0.676353
958	ASB12	0.0950717	0.182395
959	ASB13	0.153156	1.30889
960	ASB14	-0.00350378	0.10838
961	ASB16	0.0381854	0.300465
962	ASB2	0.498994	1.08486
963	ASB3	0.0515699	0.56414
964	ASB4	-0.0425289	0.0944036
965	ASB6	-0.162	0.862691
966	ASB7	-0.0464107	0.886008
967	ASB8	0.330617	1.14267
968	ASB9	0.131626	0.812271
969	ASCC1	0.123475	0.603721
970	ASCC2	0.30562	1.29455
971	ASCC3	0.317876	0.761755
972	ASCL2	0.0445228	0.851485
973	ASCL5	0.0442651	0.124733
974	ASF1A	-0.271265	1.04836
975	ASF1B	0.201318	0.724922
976	ASGR1	0.0528336	0.197874
977	ASGR2	0.201193	0.157633
978	ASH1L	0.0665643	0.82981
979	ASH2L	0.165218	0.993031
980	ASIC1	0.0621678	0.771456
981	ASIC2	0.271897	0.368261
982	ASIC3	0.33289	0.539873
983	ASIC4	0.0768654	0.0902108
984	ASIP	-0.0153875	0.198028
985	ASL	0.133278	0.818723
986	ASMT	0.0264874	0.118504
987	ASMTL	0.348334	1.2005
988	ASNS	0.00931223	0.162794
989	ASNSD1	0.100946	1.20636
990	ASPA	0.467347	0.30765
991	ASPDH	-0.174866	0.159076
992	ASPG	0.0777715	0.163243
993	ASPH	0.163413	0.841852
994	ASPHD1	0.257566	0.770395
995	ASPHD2	-0.00898091	0.41897
996	ASPM	0.252035	0.346209
997	ASPN	0.105748	1.81788
998	ASPRV1	0.135248	0.402447
999	ASPSCR1	0.214966	1.01666
1000	ASRGL1	-0.123812	0.978975
1001	ASS1	-0.239671	1.71947
1002	ASTE1	-0.131156	0.556574
1003	ASTN1	0.263505	0.201605
1004	ASTN2	0.314132	1.3218
1005	ASXL1	0.170571	0.654013
1006	ASXL2	-0.065082	0.729995
1007	ASXL3	0.339542	0.207597
1008	ATAD1	-0.00480988	1.15807
1009	ATAD2	0.0378338	0.786318
1010	ATAD2B	0.101888	0.493797
1011	ATAD3A	0.24584	1.06371
1012	ATAD3B	0.140009	0.897428
1013	ATAD3C	0.184714	0.484357
1014	ATAD5	0.309193	0.230363
1015	ATAT1	0.56787	0.820798
1016	ATE1	0.229035	1.01056
1017	ATF1	0.163277	0.859545
1018	ATF2	0.0984768	1.1233
1019	ATF3	0.429811	1.51496
1020	ATF4	0.239253	2.24822
1021	ATF5	0.302528	1.41783
1022	ATF6	0.256005	0.975185
1023	ATF6B	-0.0591319	1.35873
1024	ATF7	0.207539	0.988439
1025	ATF7IP	-0.0979243	1.11719
1026	ATF7IP2	0.0426937	0.5595
1027	ATG10	0.173001	0.458183
1028	ATG101	0.194621	0.982597
1029	ATG12	-0.0240106	0.909828
1030	ATG13	0.114001	1.17998
1031	ATG14	0.0175455	0.797474
1032	ATG16L1	-0.079681	0.840491
1033	ATG16L2	-0.155993	0.606286
1034	ATG2A	-0.141995	0.77218
1035	ATG2B	-0.0490252	0.720642
1036	ATG3	-0.13875	0.96354
1037	ATG4A	0.00751054	0.891981
1038	ATG4B	-0.184397	1.04609
1039	ATG4C	-0.0307114	0.633488
1040	ATG4D	0.0896466	0.898866
1041	ATG5	0.221185	0.916905
1042	ATG7	-0.0409305	0.601764
1043	ATG9A	0.0397923	0.768298
1044	ATG9B	0.323844	0.329896
1045	ATIC	0.0649439	1.25326
1046	ATL1	-0.00846408	0.728019
1047	ATL2	0.0626692	0.950213
1048	ATL3	-0.0902502	1.20679
1049	ATM	0.0887238	0.656303
1050	ATMIN	0.320744	1.18343
1051	ATN1	0.19177	1.64078
1052	ATOH7	0.0455748	0.165431
1053	ATOH8	0.37266	0.912892
1054	ATOX1	0.0369886	1.38751
1055	ATP10A	-0.0644678	0.466335
1056	ATP10B	-0.128205	0.0891582
1057	ATP10D	0.374908	0.633029
1058	ATP11A	0.167735	1.13463
1059	ATP11B	0.162597	1.41667
1060	ATP11C	0.222268	0.701865
1061	ATP13A1	0.0549192	1.19866
1062	ATP13A2	0.283643	1.16102
1063	ATP13A3	-0.203559	1.06475
1064	ATP13A4	0.150816	0.139452
1065	ATP1A1	0.270648	1.47551
1066	ATP1A2	0.586526	1.132
1067	ATP1A3	-0.0501405	0.0848791
1068	ATP1A4	0.1623	0.134157
1069	ATP1B1	0.402512	1.60725
1070	ATP1B2	0.282354	0.530394
1071	ATP1B3	-0.00743547	1.69425
1072	ATP23	-0.257916	0.659902
1073	ATP2A1	0.016671	0.497597
1074	ATP2A2	0.263363	1.25631
1075	ATP2A3	0.237813	1.39574
1076	ATP2B1	0.113946	1.05844
1077	ATP2B2	-0.051154	0.0958916
1078	ATP2B4	0.510636	1.30603
1079	ATP2C1	0.308507	1.93538
1080	ATP2C2	0.191401	0.911267
1081	ATP5F1A	0.183529	1.74028
1082	ATP5F1B	0.201584	2.06156
1083	ATP5F1C	0.20107	1.75069
1084	ATP5F1D	-0.0411789	2.04638
1085	ATP5F1E	-0.0311513	1.53453
1086	ATP5IF1	0.412875	1.69633
1087	ATP5MC1	0.0869258	1.74489
1088	ATP5MC2	0.396318	2.07715
1089	ATP5MC3	0.0715451	1.56209
1090	ATP5ME	0.322025	1.41074
1091	ATP5MF	0.3129	1.47453
1092	ATP5MG	-0.0161215	1.24404
1093	ATP5MGL	-0.0115474	0.133742
1094	ATP5PB	0.0833667	1.78578
1095	ATP5PD	0.066048	1.7484
1096	ATP5PF	0.231559	1.39699
1097	ATP5PO	0.0898176	1.06243
1098	ATP6AP1	0.466405	1.877
1099	ATP6AP2	0.265759	1.15828
1100	ATP6V0A1	0.191609	0.964326
1101	ATP6V0A2	-0.0415249	0.613704
1102	ATP6V0B	0.145254	1.80724
1103	ATP6V0C	-0.312585	0.159291
1104	ATP6V0D1	0.259319	1.21267
1105	ATP6V0D2	0.0308149	0.27919
1106	ATP6V0E1	0.0790019	2.26553
1107	ATP6V0E2	0.458428	1.65256
1108	ATP6V1A	0.152948	1.39803
1109	ATP6V1B2	0.255276	0.866817
1110	ATP6V1C1	-0.0235454	1.07803
1111	ATP6V1C2	-0.0713469	0.594653
1112	ATP6V1D	0.411277	1.33124
1113	ATP6V1E1	0.247814	1.58187
1114	ATP6V1E2	0.387634	0.48799
1115	ATP6V1F	0.103676	1.84413
1116	ATP6V1G1	0.296148	2.11094
1117	ATP6V1G2	-0.0527685	0.337647
1118	ATP6V1H	0.064284	1.23384
1119	ATP7A	-0.199936	0.762105
1120	ATP7B	0.297167	0.458005
1121	ATP8A1	0.41443	1.23442
1122	ATP8A2	0.374727	1.27119
1123	ATP8B1	0.442869	1.38531
1124	ATP8B2	0.338546	1.20434
1125	ATP8B3	-0.0948508	0.116258
1126	ATP8B4	0.0782375	0.722272
1127	ATP9A	-0.0213988	1.28736
1128	ATP9B	-0.153186	0.532353
1129	ATPAF1	0.478745	1.2363
1130	ATPAF2	0.30168	0.880706
1131	ATPSCKMT	-0.0937401	0.741228
1132	ATR	0.0122499	0.538567
1133	ATRAID	0.430989	2.05521
1134	ATRIP	0.064105	0.771352
1135	ATRN	0.00320249	1.11601
1136	ATRNL1	0.182202	0.382905
1137	ATRX	-0.105184	0.909144
1138	ATXN1	0.0248807	0.733956
1139	ATXN10	0.21907	1.39575
1140	ATXN1L	-0.0689659	0.755678
1141	ATXN2	0.112717	0.827427
1142	ATXN2L	-0.0904281	1.19925
1143	ATXN3	0.215988	0.717748
1144	ATXN7	0.0816839	0.476342
1145	ATXN7L1	0.0634974	0.621811
1146	ATXN7L2	0.155746	0.306341
1147	ATXN7L3	-0.255905	1.06122
1148	ATXN7L3B	0.290093	1.38664
1149	AUH	0.100701	1.35711
1150	AUNIP	0.073297	0.2224
1151	AUP1	-0.0401421	1.89122
1152	AURKA	0.284522	0.575124
1153	AURKAIP1	0.310663	1.90319
1154	AURKB	0.280876	0.571012
1155	AURKC	-0.104604	0.273563
1156	AUTS2	0.331614	0.457526
1157	AVEN	0.320655	0.861983
1158	AVIL	0.0799127	0.304328
1159	AVL9	0.22766	0.860283
1160	AVPI1	0.36127	0.965322
1161	AVPR1A	0.111154	0.617566
1162	AVPR2	0.193528	0.412974
1163	AXDND1	-0.0433734	0.143063
1164	AXIN1	0.0212188	0.911875
1165	AXIN2	0.0557609	1.00197
1166	AXL	0.465212	1.13295
1167	AZGP1	0.509117	3.00207
1168	AZI2	-0.08857	0.621895
1169	AZIN1	0.0188842	1.68439
1170	AZIN2	0.0662978	0.421759
1171	AZU1	-0.108978	0.229203
1172	B2M	0.424644	2.83132
1173	B3GALNT1	0.114494	0.709658
1174	B3GALNT2	-0.0372398	0.756818
1175	B3GALT1	-0.0716752	0.179822
1176	B3GALT2	0.527058	0.607663
1177	B3GALT4	0.390207	0.947739
1178	B3GALT5	0.0534947	0.259428
1179	B3GALT6	0.0702536	1.37914
1180	B3GAT1	0.274531	1.10027
1181	B3GAT2	0.272956	0.0898445
1182	B3GAT3	0.31354	1.58593
1183	B3GLCT	-0.0552947	0.597666
1184	B3GNT2	0.125335	0.888401
1185	B3GNT4	-0.0269291	0.155093
1186	B3GNT5	0.299912	0.71693
1187	B3GNT7	0.133682	0.435878
1188	B3GNT8	0.340077	0.401
1189	B3GNT9	0.312101	0.768933
1190	B3GNTL1	0.303705	0.429064
1191	B4GALNT1	0.284902	0.268043
1192	B4GALNT3	0.131152	0.550197
1193	B4GALNT4	0.462134	1.21841
1194	B4GALT1	0.255471	1.70558
1195	B4GALT2	-0.0223995	1.15999
1196	B4GALT3	0.432143	1.12936
1197	B4GALT4	-0.146884	0.816187
1198	B4GALT5	0.160363	1.03507
1199	B4GALT6	0.236118	0.549029
1200	B4GALT7	-0.0444605	1.10135
1201	B4GAT1	-0.100592	1.66492
1202	B9D1	0.314821	0.518651
1203	B9D2	0.099621	0.735749
1204	BAALC	0.0775284	0.194873
1205	BAAT	-0.042604	0.133154
1206	BABAM1	0.239254	1.14118
1207	BABAM2	0.167128	1.0947
1208	BACE1	0.213018	0.637522
1209	BACE2	0.104834	1.78009
1210	BACH1	-0.0523908	1.09908
1211	BACH2	0.283662	0.318026
1212	BAD	0.151673	1.18807
1213	BAG1	-0.0406167	1.19575
1214	BAG2	0.218118	0.923661
1215	BAG3	0.0378174	1.24828
1216	BAG4	0.00838247	0.800736
1217	BAG5	0.237348	1.02942
1218	BAG6	0.237885	1.60439
1219	BAHCC1	0.118956	0.70328
1220	BAHD1	0.0581358	0.737648
1221	BAIAP2	0.123552	1.54545
1222	BAIAP2L1	0.202355	1.56218
1223	BAIAP2L2	0.349978	1.07789
1224	BAIAP3	0.521728	1.03539
1225	BAK1	0.0239099	0.878481
1226	BAMBI	0.122735	1.13996
1227	BANF1	0.0387495	2.05208
1228	BANK1	0.19955	1.53866
1229	BANP	-0.17729	0.541148
1230	BAP1	0.0363953	1.20026
1231	BARD1	0.190584	0.444745
1232	BARX2	0.037196	0.758668
1233	BASP1	0.107917	1.81828
1234	BATF	0.296818	1.05998
1235	BATF2	0.374507	0.475541
1236	BATF3	0.0823718	0.430021
1237	BAX	-0.0525306	1.39826
1238	BAZ1A	0.200575	0.969333
1239	BAZ1B	-0.173918	1.34698
1240	BAZ2A	-0.00310581	1.07903
1241	BAZ2B	0.207455	0.49458
1242	BBC3	0.115569	0.682499
1243	BBIP1	0.0565523	0.414156
1244	BBOF1	-0.0117152	0.375372
1245	BBOX1	0.121086	0.396096
1246	BBS1	0.0193969	0.147812
1247	BBS10	-0.169267	1.09
1248	BBS12	0.141597	0.632689
1249	BBS2	0.0494647	0.761047
1250	BBS4	0.343885	1.08955
1251	BBS5	0.0422413	0.418191
1252	BBS7	0.128323	0.54373
1253	BBS9	0.141704	0.55951
1254	BBX	0.184328	1.00445
1255	BCAM	0.584346	2.47529
1256	BCAN	-0.0373044	0.193324
1257	BCAP29	-0.256139	0.352082
1258	BCAP31	0.300423	1.98969
1259	BCAR1	-0.0227646	1.11588
1260	BCAR3	0.263711	0.776288
1261	BCAS1	0.537237	1.26014
1262	BCAS2	0.0218018	1.25525
1263	BCAS3	0.159823	0.564983
1264	BCAS4	0.212408	0.519819
1265	BCAT1	-0.0357188	0.487915
1266	BCAT2	0.199282	1.5312
1267	BCCIP	0.2875	1.31028
1268	BCDIN3D	0.335755	0.673697
1269	BCHE	0.264467	0.719372
1270	BCKDHA	-0.040148	0.132581
1271	BCKDHB	0.120343	0.981495
1272	BCKDK	0.156715	1.23934
1273	BCL10	0.0993059	0.5428
1274	BCL11A	0.456891	0.318616
1275	BCL11B	0.231995	0.346603
1276	BCL2	0.435536	0.6731
1277	BCL2A1	0.15042	0.702824
1278	BCL2L1	0.405628	1.55903
1279	BCL2L10	0.390831	0.577988
1280	BCL2L11	-0.213641	0.667291
1281	BCL2L12	0.166503	0.856541
1282	BCL2L13	0.422068	1.10258
1283	BCL2L14	-0.0170529	0.684125
1284	BCL2L15	0.0396594	0.186446
1285	BCL2L2	0.459013	1.22457
1286	BCL3	-0.179335	1.17716
1287	BCL6	0.324783	0.813043
1288	BCL6B	0.239645	0.637687
1289	BCL7A	0.171132	0.70789
1290	BCL7B	0.202673	1.12963
1291	BCL7C	-0.13325	1.00586
1292	BCL9	0.311488	1.12546
1293	BCL9L	-0.0831344	0.777974
1294	BCLAF1	0.143497	1.11584
1295	BCLAF3	0.121345	0.749688
1296	BCO1	-0.115859	0.347786
1297	BCO2	0.173944	0.154493
1298	BCOR	0.113234	1.11534
1299	BCORL1	0.0810365	0.480196
1300	BCR	0.09201	0.931401
1301	BCS1L	0.1877	0.951259
1302	BDH1	0.406273	0.864526
1303	BDH2	0.361704	0.563277
1304	BDKRB1	0.0448529	0.104061
1305	BDKRB2	0.322987	0.442886
1306	BDNF	0.290514	0.201777
1307	BDP1	0.025739	0.732212
1308	BEAN1	0.0956169	0.205298
1309	BECN1	0.0967214	0.834925
1310	BEGAIN	0.460892	0.219598
1311	BEND3	0.410088	0.659961
1312	BEND4	0.287021	1.19047
1313	BEND5	0.194913	0.512472
1314	BEND6	0.483169	0.297194
1315	BEND7	0.541369	0.432425
1316	BEST1	0.274716	0.197737
1317	BEST4	-0.101477	0.152653
1318	BET1	0.0844969	0.775016
1319	BET1L	0.0215637	1.2276
1320	BEX1	0.433916	0.985912
1321	BEX2	0.0553917	1.15425
1322	BEX3	0.144838	2.20957
1323	BEX4	0.0893152	1.43159
1324	BEX5	0.105846	1.05115
1325	BFAR	0.00241332	1.17645
1326	BFSP1	-0.0465931	0.320046
1327	BFSP2	-0.0867721	0.0835175
1328	BGLAP	-0.186875	0.395
1329	BGN	0.134495	2.71354
1330	BHLHA15	0.3837	1.4962
1331	BHLHE22	0.238052	0.199942
1332	BHLHE40	0.221451	1.21824
1333	BHLHE41	0.229371	1.05842
1334	BHMT	0.00621629	0.11247
1335	BHMT2	0.401411	0.829224
1336	BICC1	0.0320727	0.881031
1337	BICD1	0.475478	0.865769
1338	BICD2	0.125471	0.76917
1339	BICDL1	0.340195	0.772191
1340	BICDL2	-0.0293752	0.938153
1341	BICRA	-0.0732853	0.578015
1342	BICRAL	-0.0630092	0.904002
1343	BID	-0.0529717	0.886513
1344	BIK	0.483717	1.76274
1345	BIN1	0.13812	1.44102
1346	BIN2	0.280377	0.751965
1347	BIN3	0.2805	0.460091
1348	BIRC2	0.171279	1.21754
1349	BIRC3	0.281793	1.08894
1350	BIRC5	0.427906	0.679669
1351	BIRC6	-0.0991794	0.843496
1352	BIRC7	-0.107993	0.223635
1353	BISPR	0.142673	0.392778
1354	BIVM	0.309298	0.574398
1355	BLACAT1	-0.118727	0.106746
1356	BLCAP	0.101173	1.1283
1357	BLK	0.265233	0.442766
1358	BLM	0.227232	0.2344
1359	BLMH	-0.0360522	1.10909
1360	BLNK	0.0701778	0.821394
1361	BLOC1S1	-0.0959077	0.966481
1362	BLOC1S2	-0.0459366	1.13328
1363	BLOC1S3	0.0781591	0.780854
1364	BLOC1S4	0.453745	1.1598
1365	BLOC1S5	-0.0363878	0.648867
1366	BLOC1S6	0.222649	1.20973
1367	BLVRA	0.124838	1.39506
1368	BLVRB	0.249165	1.73324
1369	BLZF1	0.279685	0.769504
1370	BMERB1	0.416561	0.96243
1371	BMF	-0.06072	0.941389
1372	BMI1	-0.0178571	1.15683
1373	BMP1	0.324924	0.720812
1374	BMP2	0.30377	0.644666
1375	BMP2K	0.0611148	0.375033
1376	BMP4	0.191279	1.28783
1377	BMP5	0.320838	1.06309
1378	BMP6	0.168182	1.10111
1379	BMP7	0.183421	0.876747
1380	BMP8A	-0.040289	0.502406
1381	BMP8B	0.206997	0.5967
1382	BMPER	0.281069	0.732239
1383	BMPR1A	0.248326	0.72633
1384	BMPR1B	0.113723	1.93734
1385	BMPR2	0.112383	1.2717
1386	BMS1	-0.0209696	1.05551
1387	BMS1P4	-0.235277	0.155683
1388	BMX	0.21567	0.586223
1389	BNC1	0.255357	0.175388
1390	BNC2	0.581365	0.438217
1391	BNIP1	0.186767	0.758954
1392	BNIP2	0.325945	0.932125
1393	BNIP3	0.338336	1.35055
1394	BNIP3L	0.336924	1.45064
1395	BNIPL	0.460722	0.648236
1396	BOC	0.451185	1.06344
1397	BOD1	0.00125689	1.43295
1398	BOD1L1	-0.0104908	0.80392
1399	BOK	-0.0712568	1.43753
1400	BOLA1	0.214852	1.1123
1401	BOLA2B	-0.147723	0.319597
1402	BOLA3	0.351377	0.698861
1403	BOP1	0.224562	1.42078
1404	BORA	0.0444256	0.21761
1405	BORCS5	-0.198738	0.612859
1406	BORCS6	-0.00161774	0.955489
1407	BORCS7	0.173867	1.31449
1408	BORCS8	-0.15185	0.629244
1409	BPGM	-0.11348	1.0955
1410	BPHL	0.386935	0.692256
1411	BPI	0.208481	0.129202
1412	BPNT1	0.277417	0.990985
1413	BPNT2	0.0724447	1.52608
1414	BPTF	0.0109611	0.920703
1415	BRAF	0.14499	0.684386
1416	BRAP	0.0381433	0.984804
1417	BRAT1	0.0700849	1.46447
1418	BRCA1	0.0653992	0.370906
1419	BRCA2	0.147153	0.184497
1420	BRCC3	0.37376	0.9559
1421	BRD1	0.111219	0.96839
1422	BRD2	0.347351	1.44737
1423	BRD3	0.102674	1.10585
1424	BRD3OS	0.0425603	0.733316
1425	BRD4	0.0381648	0.999047
1426	BRD7	0.294865	0.857125
1427	BRD8	0.169602	1.04979
1428	BRD9	-0.272838	0.745795
1429	BRF1	-0.296099	0.70644
1430	BRF2	-0.0653565	0.700839
1431	BRI3	0.0815184	1.47432
1432	BRI3BP	0.278138	0.877406
1433	BRICD5	0.137246	0.544603
1434	BRINP1	-0.11262	0.674697
1435	BRINP2	-0.0198621	0.0629421
1436	BRIP1	0.409394	0.185648
1437	BRIX1	0.343462	0.841659
1438	BRK1	0.26584	2.195
1439	BRMS1	0.0374788	1.41994
1440	BRMS1L	0.00235758	0.523763
1441	BROX	0.206381	0.973161
1442	BRPF1	0.101736	0.639091
1443	BRPF3	0.214665	1.00774
1444	BRSK1	-0.0497128	0.705825
1445	BRSK2	0.383427	0.81224
1446	BRWD1	-0.108291	0.672322
1447	BRWD3	-0.0153936	0.353608
1448	BSCL2	0.0187067	0.200689
1449	BSDC1	0.19493	1.09712
1450	BSG	0.204946	2.36122
1451	BSN	0.221652	0.167413
1452	BSPRY	0.272248	1.22021
1453	BST1	0.437531	0.46719
1454	BST2	0.158899	1.86524
1455	BTAF1	0.00757022	0.807319
1456	BTBD1	-0.0675783	1.1491
1457	BTBD10	0.0245611	0.803426
1458	BTBD16	0.0768408	0.229178
1459	BTBD18	-0.033146	0.0540077
1460	BTBD19	0.19438	0.409482
1461	BTBD2	0.119161	1.43402
1462	BTBD3	0.297383	0.917884
1463	BTBD6	0.167779	1.51864
1464	BTBD7	0.0802247	0.687947
1465	BTBD8	0.0900959	0.566581
1466	BTBD9	0.132162	0.796693
1467	BTC	-0.209316	0.762731
1468	BTD	0.404738	0.840104
1469	BTF3	0.270214	2.03156
1470	BTF3L4	0.338136	0.977303
1471	BTG1	0.124089	1.58608
1472	BTG2	0.141787	1.7361
1473	BTG3	0.292125	0.939123
1474	BTK	0.380993	0.565022
1475	BTLA	0.356767	0.359451
1476	BTN2A1	0.203695	0.831787
1477	BTN2A2	0.372729	0.766858
1478	BTN3A1	0.241487	1.064
1479	BTN3A2	0.274887	1.19769
1480	BTN3A3	0.250782	1.15994
1481	BTNL8	-0.143447	0.0707649
1482	BTNL9	-0.0702403	0.573437
1483	BTRC	0.140142	1.05303
1484	BUB1	0.282558	0.470627
1485	BUB1B	0.329668	0.443007
1486	BUB3	-0.0831508	1.24975
1487	BUD13	-0.0721093	0.961813
1488	BUD23	0.106039	1.12117
1489	BUD31	0.249183	1.20429
1490	BYSL	0.152129	1.07994
1491	BZW1	0.212784	1.13736
1492	BZW2	0.426029	1.21641
1493	C10orf143	0.044269	0.277054
1494	C10orf55	-0.00254866	0.0701868
1495	C10orf67	0.148302	0.0588011
1496	C10orf88	0.0901119	0.65408
1497	C11orf16	0.0243071	0.169765
1498	C11orf21	0.227742	0.196575
1499	C11orf24	-0.170031	1.30848
1500	C11orf42		1.30848
1501	C11orf54	0.263159	0.991936
1502	C11orf58	0.24303	1.17106
1503	C11orf65	-0.160391	0.104753
1504	C11orf68	0.00217152	1.59286
1505	C11orf71	0.161522	1.10533
1506	C11orf91	0.382768	0.114236
1507	C11orf96	0.26441	1.12539
1508	C12orf42	0.249637	0.0971753
1509	C12orf43	0.0159064	0.631497
1510	C12orf56	-0.0922161	0.527596
1511	C12orf57	0.19017	1.6676
1512	C12orf60	0.22369	0.59863
1513	C12orf71		0.59863
1514	C12orf75	0.478716	1.3365
1515	C12orf76	0.0202935	0.493135
1516	C13orf46	0.023271	0.665035
1517	C14orf119	0.121701	1.09531
1518	C14orf132	0.257388	0.776803
1519	C14orf28	0.119289	0.425615
1520	C14orf93	-0.066144	0.492082
1521	C15orf39	-0.2559	0.6622
1522	C15orf40	-0.0637101	0.410653
1523	C15orf48	-0.0141129	1.77058
1524	C15orf61	0.434514	0.570558
1525	C15orf62	0.28189	0.208747
1526	C16orf54	0.323064	0.715969
1527	C16orf74	0.37195	0.418419
1528	C16orf86	0.101535	0.447236
1529	C16orf87	0.253351	0.363963
1530	C16orf89	0.334862	0.816584
1531	C16orf95	0.0906858	0.140405
1532	C16orf96	-0.0690931	0.135228
1533	C17orf100	0.136281	0.647031
1534	C17orf107	0.183459	0.346829
1535	C17orf113	0.0581112	0.490874
1536	C17orf58	0.110181	1.12076
1537	C17orf67	0.189091	0.398444
1538	C17orf75	-0.109143	0.693853
1539	C17orf78	0.101334	0.111544
1540	C17orf99	-0.0513241	0.0905436
1541	C18orf21	0.0560461	0.881515
1542	C18orf32	-0.00530854	0.363573
1543	C18orf54	0.0249202	0.199532
1544	C19orf12	0.165033	0.939878
1545	C19orf18	0.14096	0.757666
1546	C19orf25	-0.0154245	0.916484
1547	C19orf38	0.17791	0.430976
1548	C19orf44	0.190105	0.581036
1549	C19orf47	-0.157617	0.481106
1550	C19orf53	0.029821	2.07295
1551	C19orf67	-0.0592571	0.151717
1552	C19orf73	0.0146603	0.665936
1553	C19orf81	0.0847319	1.07426
1554	C19orf84	0.0596547	0.0584592
1555	C1D	0.220078	0.620951
1556	C1GALT1	-0.151651	0.430583
1557	C1GALT1C1	0.248543	1.45616
1558	C1GALT1C1L	0.340687	0.369432
1559	C1QA	0.275203	2.06646
1560	C1QB	0.201762	1.85009
1561	C1QBP	0.191703	1.72336
1562	C1QC	0.269875	1.93026
1563	C1QL1	0.169664	0.448989
1564	C1QL3	0.0937899	0.407092
1565	C1QL4	0.0373137	0.0834179
1566	C1QTNF1	0.289848	1.39301
1567	C1QTNF12	-0.0782412	0.325188
1568	C1QTNF2	0.269857	0.750508
1569	C1QTNF3	0.123589	0.999007
1570	C1QTNF4	-0.0428994	0.355934
1571	C1QTNF6	-0.0217988	0.441857
1572	C1QTNF7	0.385808	1.04161
1573	C1R	0.389156	2.30079
1574	C1RL	0.162173	1.39641
1575	C1S	0.486186	2.23528
1576	C1orf115	0.201646	1.85834
1577	C1orf116	0.279968	1.92174
1578	C1orf122	0.163214	1.35361
1579	C1orf127	0.091443	0.127079
1580	C1orf131	0.430208	0.685225
1581	C1orf146	-0.0158023	0.0932052
1582	C1orf159	0.127485	0.622133
1583	C1orf162	0.249935	0.666005
1584	C1orf174	-0.117085	0.667017
1585	C1orf198	-0.0107593	1.14758
1586	C1orf21	0.295529	1.22601
1587	C1orf210	0.274367	1.05658
1588	C1orf216	-0.161485	1.07777
1589	C1orf220	-0.0775635	0.178419
1590	C1orf226	-0.226384	0.579155
1591	C1orf35	0.226457	0.912818
1592	C1orf43	0.390846	2.13535
1593	C1orf50	0.205256	0.35467
1594	C1orf52	0.195391	0.680783
1595	C1orf53	0.25857	0.967772
1596	C1orf54	0.317143	1.12143
1597	C1orf56	0.177105	1.03725
1598	C1orf74	0.101774	0.387583
1599	C2	0.308369	0.879969
1600	C20orf144	0.111312	0.251997
1601	C20orf202	-0.0213057	0.0967637
1602	C20orf204	0.0245923	0.216387
1603	C20orf96	0.21256	0.940569
1604	C21orf58	0.374798	0.457148
1605	C21orf91	0.217234	0.592201
1606	C22orf15	0.0368618	0.152471
1607	C22orf23	0.0495913	0.367282
1608	C22orf31	0.0173048	0.175257
1609	C22orf39	0.201666	0.789857
1610	C2CD2	0.0351564	0.753331
1611	C2CD2L	0.00395612	0.656433
1612	C2CD3	0.0982947	0.70683
1613	C2CD4A	0.150376	0.662524
1614	C2CD4B	-0.0447533	0.82877
1615	C2CD4C	-0.184013	0.651222
1616	C2CD4D	0.399282	0.702687
1617	C2CD5	-0.0607058	1.01713
1618	C2CD6	0.277883	0.0947157
1619	C2orf15	0.160996	0.438004
1620	C2orf42	-0.174541	0.864704
1621	C2orf49	0.00553785	0.766036
1622	C2orf66	-0.0784587	0.160492
1623	C2orf68	0.374017	1.07629
1624	C2orf69	-0.178334	0.855159
1625	C2orf72	0.284191	1.95037
1626	C2orf74	0.216367	0.34085
1627	C2orf76	0.193843	0.973355
1628	C2orf81	0.286749	0.182162
1629	C2orf88	0.484308	0.44572
1630	C2orf92	0.254453	0.248566
1631	C3	0.279976	1.70183
1632	C3AR1	0.175811	0.7016
1633	C3orf18	0.156301	0.789765
1634	C3orf20	-0.114454	0.087162
1635	C3orf33	0.0679449	0.312611
1636	C3orf38	-0.0815193	0.956948
1637	C3orf49	-0.141484	0.0734431
1638	C3orf52	0.0307277	0.437221
1639	C3orf62	0.132777	0.657512
1640	C3orf70	0.594096	0.640944
1641	C3orf80	0.0556078	0.62188
1642	C4A	0.0149694	1.15677
1643	C4B	0.082759	1.22708
1644	C4BPA	0.0588242	0.241217
1645	C4BPB	0.10195	0.0722976
1646	C4orf19	0.114603	0.491235
1647	C4orf3	0.251667	1.70614
1648	C4orf33	0.142636	0.309492
1649	C4orf46	0.0698463	0.634308
1650	C4orf50	0.223497	0.105746
1651	C5	-0.00426576	0.883139
1652	C5AR1	0.0470531	0.695043
1653	C5AR2	0.195776	0.113944
1654	C5orf15	0.176135	1.73837
1655	C5orf22	0.011708	0.811324
1656	C5orf24	-0.0180577	1.09586
1657	C5orf34	0.248142	0.230569
1658	C5orf58	-0.0157348	0.120734
1659	C5orf63	0.185068	0.368485
1660	C6	0.233489	0.367904
1661	C6orf120	0.0812824	0.904546
1662	C6orf132	0.119202	0.829843
1663	C6orf136	0.281348	1.0528
1664	C6orf141	0.0564308	0.392746
1665	C6orf163	-0.240029	0.398778
1666	C6orf226	0.0748068	1.25091
1667	C6orf47	0.125523	0.912791
1668	C6orf52	0.183093	0.644084
1669	C6orf58	0.0831261	0.142994
1670	C6orf62	0.0634364	1.71567
1671	C6orf89	0.237187	1.23271
1672	C7	0.427372	1.6718
1673	C7orf25	-0.106709	0.156769
1674	C7orf50	-0.124608	1.45173
1675	C7orf57	-0.0681106	0.260367
1676	C8G	0.0481623	0.369221
1677	C8orf33	0.0533803	1.09132
1678	C8orf48	-0.0697628	0.186022
1679	C8orf58	0.0211974	0.551939
1680	C8orf76	-0.0587113	0.401715
1681	C8orf82	-0.0204205	1.50385
1682	C8orf88	0.64295	0.501667
1683	C9orf152	0.500297	1.80873
1684	C9orf153	0.025187	0.125737
1685	C9orf163	0.536626	0.246641
1686	C9orf40	-0.141252	0.552659
1687	C9orf43	0.234329	0.375921
1688	C9orf50	-0.0633069	0.0961205
1689	C9orf72	0.256225	0.64238
1690	C9orf78	0.0140896	1.57649
1691	C9orf85	0.0851517	0.517555
1692	CA11	0.480025	0.890922
1693	CA12	0.0148647	0.645961
1694	CA13	0.0319438	0.678237
1695	CA14	0.195685	0.512769
1696	CA2	-0.0699675	0.824299
1697	CA3	-0.118295	1.30405
1698	CA4	-0.0186998	0.614713
1699	CA5B	0.0875266	0.60631
1700	CA8	0.205546	0.582107
1701	CA9	-0.0593267	0.191658
1702	CAAP1	-0.00873307	0.94939
1703	CAB39	0.0852123	1.43825
1704	CAB39L	0.307824	1.54129
1705	CABCOCO1	-0.0367789	1.03001
1706	CABIN1	0.0877016	1.06572
1707	CABLES1	0.318355	0.646812
1708	CABLES2	-0.236853	0.507539
1709	CABP1	0.222236	0.198055
1710	CABP4	0.509875	0.530924
1711	CABP7	-0.0239456	0.160377
1712	CABYR	0.105216	0.217456
1713	CACFD1	0.362283	1.39723
1714	CACHD1	0.527801	0.662458
1715	CACNA1A	-0.0793054	0.0926496
1716	CACNA1C	0.38582	0.586721
1717	CACNA1D	0.590759	1.30595
1718	CACNA1E	0.0416403	0.0719695
1719	CACNA1F	0.0485049	0.0809323
1720	CACNA1G	0.312037	0.48103
1721	CACNA1H	0.251553	1.31138
1722	CACNA1I	0.162704	0.21498
1723	CACNA1S	-0.0406046	0.178003
1724	CACNA2D1	0.43486	0.997482
1725	CACNA2D2	0.333182	0.796216
1726	CACNA2D3	0.388618	0.444917
1727	CACNA2D4	0.33321	0.196866
1728	CACNB1	0.00711199	0.430564
1729	CACNB2	0.221501	0.49185
1730	CACNB3	-0.194617	0.772027
1731	CACNB4	0.231638	0.260122
1732	CACNG4	0.56307	1.28951
1733	CACNG8	0.0584508	0.0604456
1734	CACTIN	-0.136781	0.65273
1735	CACUL1	0.00299166	0.894996
1736	CACYBP	0.116165	1.22182
1737	CAD	0.0649542	0.864857
1738	CADM1	0.128268	1.53344
1739	CADM2	0.0318863	0.702032
1740	CADM3	0.310945	0.391343
1741	CADM4	0.46125	1.50048
1742	CADPS	0.314927	0.822083
1743	CADPS2	-0.243551	1.12525
1744	CAGE1	-0.0555947	0.0610746
1745	CAHM	0.256513	0.42225
1746	CALB1	0.000887912	0.0774809
1747	CALB2	0.0620766	0.25246
1748	CALCB	-0.0690212	0.110824
1749	CALCOCO1	0.164392	1.3374
1750	CALCOCO2	0.0838458	1.14858
1751	CALCR	0.0733913	0.0476395
1752	CALCRL	0.111037	0.992745
1753	CALD1	0.403227	1.99212
1754	CALHM2	0.381524	0.913292
1755	CALHM5	0.551697	0.448551
1756	CALHM6	0.134691	0.405172
1757	CALM1	0.288854	1.66143
1758	CALM2	-0.00263163	1.82763
1759	CALM3	-0.025447	1.69077
1760	CALML4	0.116864	0.0514729
1761	CALML6	0.0927928	0.27976
1762	CALN1	0.000175638	0.295339
1763	CALR	0.412489	2.77214
1764	CALU	0.11622	1.55812
1765	CALY	0.138269	0.155227
1766	CAMK1	0.453793	0.563527
1767	CAMK1D	0.306003	0.743034
1768	CAMK1G	0.300718	0.496899
1769	CAMK2A	0.0962641	0.235678
1770	CAMK2B	0.467865	1.05627
1771	CAMK2D	-0.105271	1.13766
1772	CAMK2G	0.276939	0.852942
1773	CAMK2N1	0.0839024	2.14404
1774	CAMK2N2	0.0983883	0.734355
1775	CAMK4	0.283812	0.75055
1776	CAMKK1	-0.110984	0.687821
1777	CAMKK2	0.356695	2.13884
1778	CAMKMT	-0.0169055	0.474518
1779	CAMLG	0.0667463	1.12703
1780	CAMP	0.159936	0.294827
1781	CAMSAP1	-0.158362	0.717743
1782	CAMSAP2	0.0701062	0.933267
1783	CAMSAP3	0.439711	1.31423
1784	CAMTA1	-0.0117771	0.740589
1785	CAMTA2	0.00507099	0.84383
1786	CAND1	-0.116873	1.04429
1787	CAND2	0.442646	0.435109
1788	CANT1	0.366906	2.19984
1789	CANX	0.267041	2.4443
1790	CAP1	0.0842971	1.92483
1791	CAP2	0.371888	1.20909
1792	CAPG	0.430463	1.40195
1793	CAPN1	0.10323	1.52906
1794	CAPN10	-0.0995655	0.672356
1795	CAPN11	0.0312236	0.154338
1796	CAPN12	0.0332779	0.241232
1797	CAPN13	0.224492	0.537085
1798	CAPN14	-0.243678	0.139269
1799	CAPN15	0.10203	0.820396
1800	CAPN2	-0.0881536	1.44885
1801	CAPN3	0.0476482	0.19307
1802	CAPN5	0.218598	1.23969
1803	CAPN6	0.394213	0.82597
1804	CAPN7	-0.125469	0.979218
1805	CAPN8	0.0846544	0.483047
1806	CAPN9	0.0845326	0.567213
1807	CAPNS1	0.318328	2.2508
1808	CAPRIN1	0.13155	1.54927
1809	CAPRIN2	0.146644	0.686928
1810	CAPS	0.170155	1.12616
1811	CAPS2	0.173547	0.365249
1812	CAPZA1	0.0797971	1.63151
1813	CAPZA2	0.230554	1.17061
1814	CAPZB	0.346746	1.36308
1815	CARD10	-0.0424466	0.767391
1816	CARD11	0.328123	0.62063
1817	CARD14	-0.133461	0.311274
1818	CARD16	0.429494	0.694921
1819	CARD19	-0.130758	0.722548
1820	CARD6	0.303687	0.49782
1821	CARD8	0.0145432	0.675264
1822	CARD9	0.330564	0.299925
1823	CARF	-0.076271	0.345627
1824	CARHSP1	-0.0485559	0.790145
1825	CARM1	-0.134934	1.07667
1826	CARMIL1	-0.172542	0.76489
1827	CARMIL2	0.137907	0.465131
1828	CARMIL3	0.0581017	0.137047
1829	CARNMT1	0.0667383	0.825021
1830	CARNS1	-0.16082	0.236904
1831	CARS1	-0.0705693	0.854463
1832	CARS2	0.169681	1.00968
1833	CASC11	0.227971	0.211408
1834	CASC18	0.0824762	0.12335
1835	CASC2	0.0125675	0.241771
1836	CASC3	-0.0864507	1.53475
1837	CASC8	0.281858	0.358314
1838	CASC9	0.119968	0.233307
1839	CASD1	-0.0918374	1.2247
1840	CASK	-0.0321099	0.524102
1841	CASKIN1	0.571163	0.382267
1842	CASKIN2	0.121869	0.999873
1843	CASP1	0.345261	0.682704
1844	CASP10	0.169308	0.470198
1845	CASP2	0.164416	0.948213
1846	CASP3	-0.135164	0.89266
1847	CASP4	0.276026	1.03059
1848	CASP5	0.184233	0.0784467
1849	CASP6	0.335913	0.878897
1850	CASP7	0.381018	1.16819
1851	CASP8	-0.109582	0.934565
1852	CASP8AP2	0.0282359	0.565174
1853	CASP9	0.154386	0.827772
1854	CASQ1	0.454782	0.815742
1855	CASQ2	0.494088	0.75822
1856	CASR	-0.509239	0.0531246
1857	CASS4	0.140876	0.230084
1858	CAST	0.17107	1.25489
1859	CASTOR1	0.0509961	0.16448
1860	CASTOR2	0.142241	0.561026
1861	CASZ1	0.0450543	0.862195
1862	CAT	0.384171	1.52418
1863	CATIP	0.112695	0.297183
1864	CATSPER1	-0.0887383	0.0984573
1865	CATSPER2	0.368272	0.312568
1866	CATSPER3	0.350639	0.273335
1867	CATSPERB	0.127814	0.316479
1868	CATSPERE	0.162955	0.223517
1869	CATSPERG	0.0805766	0.313414
1870	CAV1	0.499654	1.52106
1871	CAV2	0.543386	0.751466
1872	CAVIN1	0.497372	2.27893
1873	CAVIN2	0.467134	1.62153
1874	CAVIN3	0.255352	0.986465
1875	CAVIN4	0.115921	0.396442
1876	CBARP	0.0937902	0.237256
1877	CBFA2T2	0.139866	0.780745
1878	CBFA2T3	0.0393362	0.695478
1879	CBFB	0.152798	1.09773
1880	CBL	0.421573	0.583794
1881	CBLB	-0.0242952	0.562998
1882	CBLC	0.302181	1.58241
1883	CBLL1	0.189912	1.03309
1884	CBLN1	-0.233826	0.354547
1885	CBLN3	0.0250179	0.562056
1886	CBLN4	0.0869469	0.200346
1887	CBR1	0.385885	1.3325
1888	CBR3	0.131079	0.952697
1889	CBR4	0.377732	1.13283
1890	CBS	0.101567	0.556715
1891	CBX1	0.0658017	1.44859
1892	CBX2	0.377724	0.627822
1893	CBX3	0.324744	1.76532
1894	CBX4	-0.0188673	1.19243
1895	CBX5	0.0140701	0.953453
1896	CBX6	-0.0736537	1.22291
1897	CBX7	0.49252	1.01721
1898	CBX8	0.500527	0.876025
1899	CBY1	0.332064	1.41701
1900	CBY3	-0.0169308	0.155813
1901	CC2D1A	-0.283023	1.12797
1902	CC2D1B	-0.187924	0.790683
1903	CC2D2A	-0.0339172	0.69631
1904	CC2D2B	0.0282652	0.120507
1905	CCAR1	0.0961091	1.10217
1906	CCAR2	0.126833	1.08017
1907	CCBE1	0.332669	0.351599
1908	CCDC102A	0.0920534	0.892165
1909	CCDC102B	0.327666	0.297901
1910	CCDC106	0.209351	0.975197
1911	CCDC107	0.078683	0.669644
1912	CCDC110	0.201623	0.576082
1913	CCDC112	0.195145	0.826134
1914	CCDC115	0.130329	1.03042
1915	CCDC116	0.0149856	0.184149
1916	CCDC117	0.0624172	1.06303
1917	CCDC12	-0.104475	1.14478
1918	CCDC120	0.275282	0.638354
1919	CCDC121	0.0939316	0.702722
1920	CCDC122	-0.0160043	0.47893
1921	CCDC124	-0.00605595	1.60475
1922	CCDC125	0.363415	0.953142
1923	CCDC126	-0.180801	0.671052
1924	CCDC127	0.0253213	0.747858
1925	CCDC13	-0.0374494	0.0831669
1926	CCDC134	0.0214089	0.626223
1927	CCDC136	0.263839	0.859185
1928	CCDC137	-0.0940065	1.03062
1929	CCDC138	0.327152	0.432466
1930	CCDC14	0.142791	0.87022
1931	CCDC141	0.0874673	0.468236
1932	CCDC142	0.11336	0.467614
1933	CCDC144A	0.0239356	0.278141
1934	CCDC146	0.102514	0.442572
1935	CCDC148	0.082271	0.162544
1936	CCDC149	0.605047	0.92238
1937	CCDC15	-0.0616837	0.437627
1938	CCDC150	0.0767858	0.0869881
1939	CCDC152	0.108175	0.242173
1940	CCDC154	-0.318199	0.844993
1941	CCDC157	0.0279724	0.303724
1942	CCDC158	0.256843	0.167531
1943	CCDC159	0.456448	1.22926
1944	CCDC163	0.0177893	0.683768
1945	CCDC167	0.227641	1.65108
1946	CCDC168	-0.310402	0.0378171
1947	CCDC17	0.254851	0.432185
1948	CCDC170	-0.0626655	0.522917
1949	CCDC171	0.19817	0.137799
1950	CCDC174	0.160961	0.941962
1951	CCDC18	0.213346	0.191393
1952	CCDC180	0.142175	0.149741
1953	CCDC181	0.352777	0.240777
1954	CCDC183	-0.167478	0.482552
1955	CCDC184	0.0226595	0.411786
1956	CCDC186	-0.02902	1.16111
1957	CCDC187	0.0888693	0.279364
1958	CCDC188	-0.108421	0.312198
1959	CCDC191	0.0575247	0.416479
1960	CCDC192	0.077293	0.114352
1961	CCDC194	-0.0119886	0.256065
1962	CCDC196	0.108262	0.0721083
1963	CCDC200	-0.00369928	0.168371
1964	CCDC22	0.260608	1.31315
1965	CCDC24	0.32574	0.819795
1966	CCDC25	0.137439	1.08126
1967	CCDC26	-0.139966	0.0851207
1968	CCDC28A	0.317978	1.49879
1969	CCDC28B	-0.00478288	0.509842
1970	CCDC3	0.109369	1.45805
1971	CCDC30	0.0567544	0.148809
1972	CCDC32	-0.127176	0.322952
1973	CCDC34	0.167027	1.08371
1974	CCDC38	-0.150847	0.0768562
1975	CCDC39	0.113489	0.0710645
1976	CCDC40	0.376785	0.562089
1977	CCDC43	0.0228267	0.941624
1978	CCDC47	0.230273	1.45049
1979	CCDC50	0.0415026	1.22228
1980	CCDC51	0.166092	0.90177
1981	CCDC57	0.142479	0.70894
1982	CCDC59	0.208789	0.958504
1983	CCDC6	-0.044631	1.26214
1984	CCDC61	-0.00649995	0.667569
1985	CCDC62	0.0982901	0.0775316
1986	CCDC65	-0.0403845	0.335643
1987	CCDC66	0.134202	0.467164
1988	CCDC68	0.459819	0.548925
1989	CCDC69	0.508648	1.1286
1990	CCDC7	0.0406764	0.230062
1991	CCDC71	-0.20089	1.2329
1992	CCDC71L	0.271178	0.925051
1993	CCDC73	0.0582989	0.0619957
1994	CCDC74A	0.111949	0.89851
1995	CCDC74B	0.180814	0.692994
1996	CCDC77	0.125882	0.59304
1997	CCDC78	0.46345	0.670386
1998	CCDC8	0.430878	0.863286
[truncated: 14,060 more rows]

## Sheet: single head
	gene	pcc	rmse
0	A1BG	0.038138	0.0429244
1	A2M	0.125261	1.31423
2	A2ML1	0.270585	0.367625
3	A4GALT	0.413393	0.560259
4	AAAS	0.0690901	0.274909
5	AACS	0.249326	0.364744
6	AADAT	0.152489	0.812757
7	AAGAB	0.0588934	0.458992
8	AAK1	0.0801831	0.595141
9	AAMDC	0.256278	0.332523
10	AAMP	0.103832	0.452482
11	AANAT	-0.0237007	0.0447996
12	AAR2	0.250155	0.401039
13	AARD	0.253251	0.282137
14	AARS1	0.229248	0.523866
15	AARS2	-0.0118522	0.261561
16	AARSD1	-0.0101067	0.202901
17	AASDH	-0.00370398	0.398511
18	AASDHPPT	-0.000227969	0.573269
19	AASS	-0.0360434	0.530818
20	AATBC	0.227124	0.363424
21	AATF	-0.179959	0.326144
22	AATK	-0.083892	0.435308
23	ABAT	0.291871	0.873972
24	ABCA1	-0.101656	0.687687
25	ABCA10	0.232673	0.170325
26	ABCA12	-0.279542	0.191734
27	ABCA13	0.0472478	0.0384358
28	ABCA2	0.293257	0.555908
29	ABCA3	0.219241	0.586021
30	ABCA4	0.241433	0.0965828
31	ABCA5	0.14451	0.344863
32	ABCA6	0.23498	0.198994
33	ABCA7	0.0237336	0.422505
34	ABCA8	0.499715	0.535435
35	ABCA9	0.0701774	0.209421
36	ABCB1	0.311069	0.651066
37	ABCB10	-0.118396	0.506296
38	ABCB11	-0.0513051	0.0756525
39	ABCB4	0.275367	0.134588
40	ABCB5	-0.0244152	0.230393
41	ABCB6	0.229052	0.123098
42	ABCB7	0.00716137	0.385238
43	ABCB8	0.0661901	0.435258
44	ABCB9	-0.158529	0.1657
45	ABCC1	0.0765428	0.542281
46	ABCC10	0.124841	0.333577
47	ABCC11	0.0887584	1.02721
48	ABCC2	0.320571	0.0853239
49	ABCC3	0.505242	0.601701
50	ABCC4	0.207261	1.2435
51	ABCC5	0.356456	0.550344
52	ABCC6	0.350242	0.457391
53	ABCC8	-0.154456	0.456186
54	ABCC9	0.548703	0.641494
55	ABCD1	0.116011	0.380473
56	ABCD2	0.379081	0.112287
57	ABCD3	0.167386	0.542645
58	ABCD4	0.123136	0.263052
59	ABCE1	0.00668482	0.543962
60	ABCF1	0.0672578	0.435743
61	ABCF2	0.0828449	0.289982
62	ABCF3	0.243394	0.396282
63	ABCG1	0.0360772	0.593661
64	ABCG2	0.542926	0.661582
65	ABCG4	0.396323	0.0493534
66	ABCG5		0.0493534
67	ABCG8	-0.0155677	0.0130249
68	ABHD1	0.365253	0.383143
69	ABHD10	0.259814	0.452414
70	ABHD11	-0.121245	0.640844
71	ABHD12	0.0752198	0.782557
72	ABHD12B	-0.189428	0.0463344
73	ABHD13	0.0490516	0.417401
74	ABHD14A	0.119597	0.601255
75	ABHD14B	0.294029	0.455585
76	ABHD15	0.214566	0.376709
77	ABHD16A	0.0561298	0.159718
78	ABHD17A	0.0246616	0.366826
79	ABHD17B	-0.0518804	0.633943
80	ABHD17C	0.235137	0.617486
81	ABHD18	0.174903	0.282457
82	ABHD2	-0.0538532	1.3238
83	ABHD3	0.123713	0.509355
84	ABHD4	0.101192	0.592327
85	ABHD5	-0.0243121	0.383996
86	ABHD6	0.489306	0.381434
87	ABHD8	0.0307887	0.445018
88	ABI1	-0.0402711	0.537583
89	ABI2	-0.0468374	0.443883
90	ABI3	0.178534	0.553786
91	ABI3BP	0.327763	0.63949
92	ABITRAM	-0.0109344	0.494188
93	ABL1	-0.0984152	0.668494
94	ABL2	-0.0318666	0.348407
95	ABLIM1	0.255255	0.74743
96	ABLIM2	-0.0227088	0.3309
97	ABLIM3	-0.0489187	0.622375
98	ABO	0.5165	0.684571
99	ABR	0.243785	0.473741
100	ABRACL	0.00782305	0.703922
101	ABRAXAS1	0.184541	0.312233
102	ABRAXAS2	-0.0822064	0.456865
103	ABT1	0.105165	0.292635
104	ABTB1	-0.018735	0.503287
105	ABTB2	-0.028633	0.765043
106	ACAA1	0.41986	0.447524
107	ACAA2	0.575735	0.551805
108	ACACA	0.306209	0.898204
109	ACACB	0.608872	0.433682
110	ACAD10	0.18688	0.351225
111	ACAD11	0.176262	0.0846458
112	ACAD8	0.116581	0.915395
113	ACAD9	0.0541984	0.341273
114	ACADL	0.496545	0.950912
115	ACADM	-0.154136	0.701533
116	ACADS	0.227759	0.540682
117	ACADSB	-0.0167373	0.833585
118	ACADVL	0.0872794	0.489052
119	ACAN	0.0544268	0.380501
120	ACAP1	0.213791	0.465667
121	ACAP2	-0.103236	0.627896
122	ACAP3	0.150031	0.471072
123	ACAT1	0.104694	0.552306
124	ACAT2	0.283436	0.677661
125	ACBD3	-0.279782	0.768874
126	ACBD4	0.00524709	0.454139
127	ACBD5	0.0883314	0.568963
128	ACBD6	0.094267	0.292493
129	ACBD7	0.215908	0.324334
130	ACCS	-0.0240128	0.567915
131	ACD	-0.133855	0.394542
132	ACE	0.362389	0.541402
133	ACE2	-0.0401277	0.0889498
134	ACER2	-0.0540965	0.930995
135	ACER3	0.0905301	0.837109
136	ACHE	0.19071	0.719232
137	ACIN1	0.0917421	0.339053
138	ACKR1	0.137874	1.10718
139	ACKR2	0.105573	0.323103
140	ACKR3	0.386722	0.832635
141	ACKR4	0.139976	0.0688435
142	ACLY	0.15617	0.97417
143	ACMSD	0.04045	0.0443339
144	ACO1	0.278462	0.594207
145	ACO2	0.0183558	0.596274
146	ACOT1	0.219159	0.495465
147	ACOT11	0.557557	0.293344
148	ACOT13	0.337838	0.386201
149	ACOT2	0.197397	0.468983
150	ACOT4	0.0803474	0.346723
151	ACOT7	0.0694581	0.357776
152	ACOT8	0.280936	0.319325
153	ACOT9	0.238646	0.335501
154	ACOX1	0.226964	0.576696
155	ACOX2	0.536061	0.574331
156	ACOX3	0.306452	0.48304
157	ACOXL	0.280749	0.383925
158	ACP1	0.0881998	0.447779
159	ACP2	0.518165	0.420661
160	ACP3	0.586494	1.49873
161	ACP4	0.209828	0.298365
162	ACP5	0.355839	1.07292
163	ACP6	0.346814	0.335626
164	ACP7	0.371464	0.112608
165	ACR	-0.0486139	0.101037
166	ACRBP	0.00101062	0.315176
167	ACRV1	0.457466	0.285089
168	ACSBG1	0.267963	0.228711
169	ACSBG2	0.1086	0.051855
170	ACSF2	0.538233	0.653828
171	ACSF3	-0.142947	0.309145
172	ACSL1	-0.0602305	1.07706
173	ACSL3	0.0153807	1.04398
174	ACSL4	0.540091	0.672815
175	ACSL5	0.0927011	1.1442
176	ACSL6	0.092816	0.0667122
177	ACSM1	0.324003	1.82062
178	ACSM3	0.141387	0.868629
179	ACSM4	0.0306733	0.0362402
180	ACSM5	0.0603578	0.121468
181	ACSS1	0.127582	0.605294
182	ACSS2	0.471123	0.340615
183	ACSS3	0.691679	0.35793
184	ACTA1	0.457444	1.48103
185	ACTA2	0.623972	1.16219
186	ACTB	0.32197	0.786998
187	ACTC1	0.594554	1.23535
188	ACTG1	-0.115293	0.756083
189	ACTG2	0.681512	1.23013
190	ACTL6A	-0.0488435	0.572496
191	ACTN1	0.568478	0.815694
192	ACTN2	0.104058	0.898182
193	ACTN3	0.0564959	0.0617771
194	ACTN4	0.288297	0.808987
195	ACTR10	0.116798	0.415811
196	ACTR1A	0.156261	0.443967
197	ACTR1B	0.0745758	0.380171
198	ACTR2	-0.00128666	0.814656
199	ACTR3	0.0634256	0.577245
200	ACTR3B	0.401061	0.259864
201	ACTR3C	0.134498	0.204972
202	ACTR5	0.0192929	0.258306
203	ACTR6	0.06093	0.384892
204	ACTR8	0.0308156	0.490324
205	ACTRT3	0.203096	0.246934
206	ACVR1	0.142274	0.67372
207	ACVR1B	0.16279	0.524419
208	ACVR1C	0.0290541	0.0841404
209	ACVR2A	-0.0410072	0.464118
210	ACVR2B	0.0578256	0.322124
211	ACVRL1	0.213651	0.562394
212	ACY1	0.167368	0.122532
213	ACY3	0.0949783	0.78651
214	ACYP1	0.117828	0.40449
215	ACYP2	0.148733	0.291052
216	ADA	0.431535	0.336602
217	ADA2	0.347089	0.700322
218	ADAD2	0.187163	0.118692
219	ADAM10	0.00746137	0.807481
220	ADAM11	0.304143	0.257958
221	ADAM12	0.213983	0.231043
222	ADAM15	0.116594	0.454402
223	ADAM17	-0.0584467	0.440729
224	ADAM19	0.574757	0.458863
225	ADAM20	0.241739	0.0522551
226	ADAM21	0.208306	0.323577
227	ADAM22	0.345149	0.769464
228	ADAM23	0.316212	0.292099
229	ADAM28	0.202939	0.467892
230	ADAM32	0.0928701	0.233502
231	ADAM33	0.590182	0.592204
232	ADAM8	0.157964	0.476512
233	ADAM9	0.0305856	0.91014
234	ADAMDEC1	0.0252792	0.636866
235	ADAMTS1	0.55637	1.06908
236	ADAMTS10	0.441819	0.423538
237	ADAMTS12	0.1757	0.290838
238	ADAMTS13	0.306561	0.375938
239	ADAMTS14	0.0818202	0.157539
240	ADAMTS15	0.437083	0.300966
241	ADAMTS16	0.0677764	0.159987
242	ADAMTS17	0.293359	0.162311
243	ADAMTS18	0.102297	0.0917081
244	ADAMTS2	0.215376	0.714831
245	ADAMTS3	-0.150301	0.417991
246	ADAMTS4	0.253864	0.860064
247	ADAMTS5	0.468899	0.501209
248	ADAMTS6	0.0598805	0.235702
249	ADAMTS7	0.170285	0.195709
250	ADAMTS8	0.502055	0.478375
251	ADAMTS9	0.359369	0.510561
252	ADAMTSL1	0.12119	1.04507
253	ADAMTSL2	0.354053	0.601914
254	ADAMTSL3	0.244199	0.761285
255	ADAMTSL4	0.479114	0.397726
256	ADAMTSL5	0.0902527	0.354277
257	ADAP1	0.0187215	0.374801
258	ADAP2	0.130742	0.382454
259	ADAR	0.101777	0.778451
260	ADARB1	0.0880293	0.413957
261	ADARB2	0.347383	0.572253
262	ADAT1	-0.0700914	0.547332
263	ADAT2	0.208809	0.386862
264	ADAT3	-0.0222287	0.394227
265	ADCK1	0.113865	0.288283
266	ADCK2	0.087922	0.4218
267	ADCK5	0.0858968	0.545335
268	ADCY1	-0.043177	0.75522
269	ADCY10	0.159313	0.131767
270	ADCY2	0.416725	0.548367
271	ADCY3	0.454228	0.689597
272	ADCY4	0.183377	0.443218
273	ADCY5	0.592477	0.72827
274	ADCY6	0.192172	0.653458
275	ADCY7	0.234011	0.333566
276	ADCY9	0.173025	0.569853
277	ADCYAP1	0.201306	0.261253
278	ADCYAP1R1	0.478544	0.221621
279	ADD1	0.382372	0.490227
280	ADD2	0.0556207	0.453585
281	ADD3	0.252948	1.09193
282	ADGRA2	0.633312	1.04634
283	ADGRA3	-0.209105	0.512793
284	ADGRB1	0.123285	0.39247
285	ADGRB2	0.177806	0.35761
286	ADGRB3	0.486931	0.166819
287	ADGRD1	0.203253	0.452119
288	ADGRE1	0.106821	0.131326
289	ADGRE2	0.188124	0.28223
290	ADGRE3	0.112744	0.138879
291	ADGRE5	0.0021703	0.654892
292	ADGRF1	0.0418463	1.22822
293	ADGRF3	-0.369776	0.0785204
294	ADGRF5	-0.14882	1.55613
295	ADGRG1	0.120901	0.579941
296	ADGRG2	0.345047	0.529008
297	ADGRG3	-0.00194095	0.132607
298	ADGRG5	0.2239	0.256279
299	ADGRG6	0.459479	0.637678
300	ADGRL1	0.0491492	0.605966
301	ADGRL2	0.40863	0.693073
302	ADGRL3	0.478278	0.183181
303	ADGRL4	0.205899	0.661175
304	ADGRV1	-0.055713	0.326631
305	ADH1B	0.264377	0.420269
306	ADH1C	0.241601	0.797193
307	ADH5	0.595213	0.602129
308	ADH6	-0.142783	0.234375
309	ADHFE1	0.206289	0.548885
310	ADI1	0.418247	0.515488
311	ADIPOR1	0.0528777	0.766247
312	ADIPOR2	0.21662	0.553712
313	ADK	-0.00503924	0.418434
314	ADM	0.145559	0.942923
315	ADM2	0.317516	0.6744
316	ADM5	-0.0607636	0.345008
317	ADNP	-0.00261281	0.685818
318	ADNP2	-0.0874479	0.509266
319	ADO	-0.15377	0.365326
320	ADORA1	0.243156	0.167542
321	ADORA2A	-0.12118	0.071012
322	ADORA2B	0.370855	0.365793
323	ADORA3	0.078204	0.38828
324	ADPGK	0.246179	0.526432
325	ADPRH	0.064591	0.550941
326	ADPRHL1	-0.0805895	0.49876
327	ADPRM	0.186938	0.655983
328	ADPRS	0.194959	0.315475
329	ADRA1A	0.552075	0.45326
330	ADRA1B	0.280156	0.100152
331	ADRA1D	0.442011	0.558864
332	ADRA2A	-0.0354435	0.954275
333	ADRA2B	0.166874	0.212964
334	ADRA2C	0.37142	0.821187
335	ADRB1	0.258437	0.731894
336	ADRB2	-0.0908501	0.767655
337	ADRM1	-0.0777709	0.351831
338	ADSL	0.511331	0.150059
339	ADSS1	-0.0103888	0.367026
340	ADSS2	0.150734	0.635635
341	ADTRP	0.188189	0.375323
342	AEBP1	0.284137	1.12302
343	AEBP2	0.34494	0.430375
344	AEN	-0.0693708	0.473077
345	AFAP1	0.182405	0.337803
346	AFAP1L1	0.337734	0.404816
347	AFAP1L2	0.492354	0.637975
348	AFDN	-0.0608763	0.819381
349	AFF1	-0.179764	0.841443
350	AFF2	0.366906	0.140507
351	AFF3	0.326839	1.07583
352	AFF4	0.102155	0.87429
353	AFG1L	-0.0218569	0.241426
354	AFG3L2	0.0410902	0.56282
355	AFMID	0.380864	0.475608
356	AFTPH	0.0586058	0.657219
357	AGA	0.344348	0.482312
358	AGAP1	0.0361144	0.556437
359	AGAP2	0.00153814	0.264317
360	AGAP3	-0.0682694	0.411731
361	AGAP4	0.0810705	0.283382
362	AGAP5	0.176325	0.0782147
363	AGAP6	0.212493	0.127915
364	AGAP9	0.0718586	0.450389
365	AGBL2	0.232293	0.187228
366	AGBL3	0.16066	0.202888
367	AGBL4	0.106239	0.109851
368	AGBL5	0.0455064	0.333974
369	AGER	0.0731993	0.598888
370	AGFG1	-0.0987147	0.480255
371	AGFG2	0.102342	0.52581
372	AGGF1	0.0309366	0.394547
373	AGK	0.176347	0.381512
374	AGL	0.232896	0.58931
375	AGMAT	0.14909	0.56211
376	AGMO	-0.00787897	0.252529
377	AGO1	0.20449	0.378035
378	AGO2	0.0940746	0.533954
379	AGO3	0.169558	0.28164
380	AGO4	0.178587	0.449622
381	AGPAT1	0.335979	0.460154
382	AGPAT2	-0.0622673	0.600349
383	AGPAT3	0.126551	0.527845
384	AGPAT4	0.573014	0.205364
385	AGPAT5	0.0784843	0.566779
386	AGPS	0.103455	0.542121
387	AGR2	-0.0630092	1.60094
388	AGRN	0.181462	0.698832
389	AGRP	0.195106	0.115685
390	AGT	-0.0225277	1.57533
391	AGTPBP1	0.0130812	0.491292
392	AGTR1	0.225359	1.34126
393	AGTRAP	0.462197	0.545273
394	AHCTF1	0.152638	0.583559
395	AHCY	0.311045	0.441193
396	AHCYL1	-0.0411016	0.701609
397	AHCYL2	0.203102	0.617355
398	AHDC1	0.358767	0.510202
399	AHI1	0.0981035	0.359115
400	AHNAK	0.31503	1.13669
401	AHNAK2	0.583548	0.678194
402	AHR	0.336464	0.634506
403	AHRR	0.17975	0.0798121
404	AHSA1	0.0613968	0.456022
405	AIDA	0.361669	0.856107
406	AIF1	0.180689	0.769497
407	AIF1L	0.368977	0.490506
408	AIFM1	0.465149	0.316676
409	AIFM2	0.487795	0.377639
410	AIFM3	0.0363478	0.203587
411	AIG1	0.0591538	0.343318
412	AIM2	0.260501	0.337707
413	AIMP1	-0.232717	0.319565
414	AIMP2	0.297583	0.480559
415	AIP	-0.0313709	0.457241
416	AIRE	0.0125303	0.0614577
417	AJAP1	0.472713	0.196607
418	AJM1	0.213769	0.474805
419	AJUBA	0.487862	0.619619
420	AK1	-0.116509	0.346838
421	AK2	0.0719729	0.392061
422	AK3	0.185786	0.563643
423	AK4	0.230009	0.742628
424	AK5	0.367131	0.933156
425	AK6	0.0940042	0.436713
426	AK7	0.016698	0.303574
427	AK8	0.220211	0.291316
428	AK9	-0.0794646	0.270785
429	AKAP1	-0.0319655	0.674514
430	AKAP10	0.074452	0.461287
431	AKAP11	0.128149	0.746335
432	AKAP12	0.562851	0.941885
433	AKAP13	0.0792373	0.762391
434	AKAP17A	0.165162	0.403019
435	AKAP3	0.303797	0.318001
436	AKAP5	0.145941	0.329286
437	AKAP6	0.33825	0.264483
438	AKAP7	0.498363	0.578793
439	AKAP8	0.213128	0.306049
440	AKAP8L	0.0211527	0.364852
441	AKAP9	-0.0798312	0.757089
442	AKIP1	0.146692	0.329209
443	AKIRIN1	0.153334	0.66667
444	AKIRIN2	0.0344097	0.440592
445	AKNA	0.263669	0.485496
446	AKR1A1	0.331101	0.475544
447	AKR1B1	0.354751	0.687663
448	AKR1B10	-0.137659	0.213309
449	AKR1B15	-0.0584087	0.0690893
450	AKR1C1	0.189173	0.478162
451	AKR1C2	0.239646	0.34404
452	AKR1C3	0.199726	0.700359
453	AKR1E2	0.0392271	0.372634
454	AKR7A2	0.298707	0.418172
455	AKR7A3	0.253588	0.427755
456	AKT1	0.119164	0.596769
457	AKT1S1	0.264061	0.348172
458	AKT2	0.00219996	0.405815
459	AKT3	0.0555271	0.757913
460	AKTIP	0.0986195	0.364732
461	ALAD	0.55684	0.603457
462	ALAS1	0.16489	0.531786
463	ALAS2	0.462624	0.0789641
464	ALB	0.328189	1.00152
465	ALCAM	0.000632936	0.91745
466	ALDH16A1	-0.168992	0.500795
467	ALDH18A1	0.0764935	0.576037
468	ALDH1A1	0.0889163	1.47579
469	ALDH1A2	0.723279	0.630907
470	ALDH1A3	0.262092	1.05904
471	ALDH1B1	0.382513	0.582844
472	ALDH1L1	0.0217804	0.726021
473	ALDH1L2	0.493078	0.385833
474	ALDH2	0.44105	0.788942
475	ALDH3A1	0.281831	0.293287
476	ALDH3A2	0.512134	0.509159
477	ALDH3B1	0.310722	0.393595
478	ALDH4A1	0.394842	0.705128
479	ALDH5A1	-0.0254749	0.482181
480	ALDH6A1	0.218073	0.831565
481	ALDH7A1	0.332193	0.563112
482	ALDH8A1	0.0413125	0.175959
483	ALDH9A1	0.181556	0.798104
484	ALDOA	0.00713816	0.45134
485	ALDOB	-0.169769	0.106798
486	ALDOC	0.360934	0.56038
487	ALG1	0.218182	0.341911
488	ALG10	-0.172288	0.332203
489	ALG10B	-0.319616	0.431065
490	ALG11	-0.0335902	0.353941
491	ALG12	0.144569	0.468751
492	ALG13	0.0695116	0.276237
493	ALG14	0.0702944	0.261885
494	ALG1L2	-0.0652401	0.155145
495	ALG2	0.174395	0.573136
496	ALG3	0.132996	0.402617
497	ALG5	0.297706	0.440394
498	ALG6	0.258112	0.343746
499	ALG8	0.355641	0.423464
500	ALG9	0.0655257	0.198922
501	ALK	-0.152859	0.0461953
502	ALKAL2	0.216565	0.258532
503	ALKBH1	0.19371	0.2539
504	ALKBH2	0.435347	0.424101
505	ALKBH3	0.327058	0.301805
506	ALKBH4	0.0731915	0.334171
507	ALKBH5	0.197649	0.431968
508	ALKBH6	-0.0949985	0.197068
509	ALKBH7	0.131076	0.605922
510	ALKBH8	0.0653829	0.355257
511	ALMS1	-0.100302	0.471214
512	ALOX12	0.249559	0.108784
513	ALOX15	0.162096	1.11881
514	ALOX15B	0.454498	2.37245
515	ALOX5	-0.0385851	0.719111
516	ALOX5AP	0.199276	0.671462
517	ALPK1	0.427804	0.313749
518	ALPK2	-0.0365872	0.0952153
519	ALPK3	0.0993542	0.478782
520	ALPL	0.166212	0.851981
521	ALS2	0.0326105	0.393545
522	ALS2CL	0.270281	0.525607
523	ALX4	0.337356	0.38268
524	ALYREF	0.112988	0.391139
525	AMACR	0.344708	1.26699
526	AMBP	0.239101	0.30605
527	AMBRA1	0.0220665	0.448289
528	AMD1	0.272101	0.858682
529	AMDHD1	0.032649	0.115507
530	AMDHD2	-0.1025	0.411277
531	AMER1	0.162838	0.317615
532	AMFR	0.389284	0.443055
533	AMH	0.399383	0.653386
534	AMHR2	0.0835794	0.119875
535	AMIGO1	-0.0758666	0.526274
536	AMIGO2	0.329607	0.731503
537	AMMECR1	-0.0667601	0.586575
538	AMMECR1L	-0.189636	0.479455
539	AMN	0.0521863	0.244103
540	AMN1	-0.124891	0.345664
541	AMOT	0.49603	0.754615
542	AMOTL1	-0.0131326	0.947
543	AMOTL2	0.352392	0.78653
544	AMPD2	-0.142979	0.335585
545	AMPD3	-0.0165327	0.823978
546	AMPH	0.379959	0.192666
547	AMT	-0.158748	0.0764076
548	AMY2B	0.44882	0.385346
549	AMZ1	-0.0588843	0.0568607
550	AMZ2	0.0324392	0.350826
551	ANAPC1	-0.0438158	0.429609
552	ANAPC10	-0.0485461	0.138507
553	ANAPC11	0.157784	0.449692
554	ANAPC13	0.223425	0.519031
555	ANAPC15	0.155118	0.315434
556	ANAPC16	0.441944	0.341557
557	ANAPC2	-0.0401854	0.373032
558	ANAPC4	0.279344	0.283116
559	ANAPC5	0.366218	0.327725
560	ANAPC7	0.156707	0.251368
561	ANG	0.549478	0.81148
562	ANGEL1	0.166167	0.399092
563	ANGEL2	-0.183963	0.480873
564	ANGPT1	0.641514	0.677479
565	ANGPT2	0.199781	0.60638
566	ANGPT4	0.411063	0.0887585
567	ANGPTL1	0.53287	0.583175
568	ANGPTL2	0.431004	0.941386
569	ANGPTL3	0.357624	0.67581
570	ANGPTL4	0.412147	1.07113
571	ANGPTL6	0.108332	0.0952865
572	ANGPTL8	0.154408	0.118453
573	ANK1	-0.00511927	0.450515
574	ANK2	0.551752	0.326397
575	ANK3	0.160776	0.700337
576	ANKAR	0.105365	0.209914
577	ANKDD1A	0.379532	0.320301
578	ANKDD1B	0.494018	0.219954
579	ANKEF1	-0.0202451	0.355369
580	ANKFN1	-0.00527138	0.0977836
581	ANKFY1	0.272043	0.631937
582	ANKH	0.0388197	0.860424
583	ANKHD1	0.119493	0.0978534
584	ANKIB1	-0.110852	0.689498
585	ANKK1	0.0671225	0.379242
586	ANKLE1	0.233359	0.151347
587	ANKLE2	0.102653	0.2548
588	ANKMY1	0.124162	0.234778
589	ANKMY2	0.304007	0.394726
590	ANKRA2	-0.123145	0.56194
591	ANKRD1	0.0749335	0.860945
592	ANKRD10	0.228766	0.520623
593	ANKRD11	-0.0075805	0.46656
594	ANKRD12	-0.0109996	0.581992
595	ANKRD13A	0.16223	0.525568
596	ANKRD13B	0.565699	0.469349
597	ANKRD13C	0.0823426	0.415098
598	ANKRD13D	-0.0128589	0.436015
599	ANKRD16	0.268427	0.352984
600	ANKRD17	-0.0329967	0.801466
601	ANKRD18A	0.10389	0.269222
602	ANKRD18B	0.109791	0.318262
603	ANKRD2	-0.0133171	0.376536
604	ANKRD22	0.122716	0.712211
605	ANKRD23	-0.0114294	0.24302
606	ANKRD24	0.0581975	0.475295
607	ANKRD26	0.0151802	0.229557
608	ANKRD27	0.12624	0.502067
609	ANKRD28	-0.106793	0.456391
610	ANKRD29	0.183546	0.896862
611	ANKRD31	0.15822	0.0642106
612	ANKRD33B	0.514604	0.309503
613	ANKRD34A	-0.104021	0.359598
614	ANKRD35	0.481096	0.524423
615	ANKRD36	-0.0188386	0.180878
616	ANKRD36B	0.0771558	0.213891
617	ANKRD36C	0.0633994	0.205994
618	ANKRD37	0.246413	0.795774
619	ANKRD39	0.0159803	0.223261
620	ANKRD40	-0.0483232	0.63061
621	ANKRD42	0.159175	0.336055
622	ANKRD44	0.191677	0.360513
623	ANKRD45	0.0196721	0.0783371
624	ANKRD46	0.0816906	0.490208
625	ANKRD49	0.0521099	0.335283
626	ANKRD50	0.172731	0.847144
627	ANKRD52	0.333488	0.636607
628	ANKRD53	0.12491	0.241701
629	ANKRD54	0.222107	0.302394
630	ANKRD55	0.182009	0.0829752
631	ANKRD6	0.0460286	0.384851
632	ANKRD61	0.0163852	0.212328
633	ANKRD65	0.400928	0.635965
634	ANKRD9	-0.0222912	0.425228
635	ANKS1A	0.101744	0.495326
636	ANKS1B	0.14068	0.184216
637	ANKS3	0.23755	0.445609
638	ANKS6	0.0310673	0.513821
639	ANKZF1	0.419966	0.423818
640	ANLN	0.379492	0.523367
641	ANO1	0.447866	0.822874
642	ANO10	-0.191677	0.428637
643	ANO2	-0.111773	0.164031
644	ANO3	0.0416263	0.181143
645	ANO4	0.7343	0.545597
646	ANO5	0.523831	0.562645
647	ANO6	0.503938	0.803816
648	ANO7	0.534296	1.13865
649	ANO8	0.228005	0.444674
650	ANO9	0.201333	0.616302
651	ANOS1	0.0999793	0.813868
652	ANP32A	0.147691	0.404936
653	ANP32B	0.209099	0.430174
654	ANP32E	0.553051	0.619514
655	ANPEP	0.458531	2.33058
656	ANTKMT	0.216009	0.593514
657	ANTXR1	0.548594	1.07449
658	ANTXR2	0.494905	0.936701
659	ANXA1	0.575534	0.941599
660	ANXA10	0.188813	0.188668
661	ANXA11	0.367778	0.464335
662	ANXA13	-0.120162	0.203848
663	ANXA2	0.506205	0.791492
664	ANXA2R	0.0126823	0.615001
665	ANXA3	0.36026	0.860007
666	ANXA4	0.408427	0.47692
667	ANXA5	0.0220174	0.706329
668	ANXA6	0.510833	0.731614
669	ANXA7	0.253143	0.553955
670	ANXA8	0.215496	0.369864
671	ANXA9	-0.132339	0.553771
672	AOAH	0.19391	0.55996
673	AOC1	0.529017	1.59618
674	AOC2	-0.118867	0.347108
675	AOC3	0.638791	0.901569
676	AOPEP	0.498834	0.4373
677	AOX1	0.725766	0.885047
678	AP1AR	-0.0347384	0.528271
679	AP1B1	0.36332	0.589437
680	AP1G1	0.271964	0.625336
681	AP1G2	0.141257	0.456525
682	AP1M1	-0.0986826	0.263137
683	AP1M2	0.468401	0.434118
684	AP1S1	0.244248	0.538601
685	AP1S2	0.0425244	0.434488
686	AP1S3	-0.0364188	0.430109
687	AP2A1	0.0423197	0.475198
688	AP2A2	-0.0355479	0.397988
689	AP2B1	0.0860518	0.622366
690	AP2M1	0.223786	0.497926
691	AP2S1	0.224371	0.647738
692	AP3B1	0.196995	0.660899
693	AP3B2	0.12596	0.235342
694	AP3D1	0.163458	0.584825
695	AP3M1	-0.0975103	0.688926
696	AP3M2	0.0874797	0.482797
697	AP3S1	-0.332239	0.466569
698	AP3S2	-0.0323628	0.348505
699	AP4B1	-0.110329	0.26398
700	AP4E1	0.0954997	0.344425
701	AP4M1	0.329628	0.317416
702	AP4S1	0.368511	0.159344
703	AP5B1	0.208444	0.420373
704	AP5M1	-0.0621283	0.408735
705	AP5S1	0.192525	0.231369
706	AP5Z1	-0.0316615	0.360892
707	APAF1	0.0146326	0.604019
708	APBA1	-0.11959	0.395082
709	APBA2	0.589089	0.525731
710	APBA3	-0.128349	0.279142
711	APBB1	0.549837	0.474708
712	APBB1IP	0.108685	0.558795
713	APBB2	0.120056	0.467753
714	APBB3	0.0663619	0.444517
715	APC	0.111413	0.68608
716	APC2	0.107851	0.15733
717	APCDD1	0.309734	0.835867
718	APCDD1L	0.279988	0.115189
719	APEH	0.230269	0.440561
720	APEX1	0.198415	0.548629
721	APEX2	0.135574	0.381395
722	APH1A	0.0366566	0.630033
723	APH1B	0.23448	0.601517
724	API5	-0.0135724	0.547676
725	APIP	0.0016167	0.436661
726	APLF	0.553517	0.192569
727	APLN	0.372613	0.729655
728	APLNR	0.0450437	0.695565
729	APLP1	0.0632685	0.569999
730	APLP2	0.319952	0.878121
731	APMAP	0.198611	0.641328
732	APOA1	0.0222665	0.30077
733	APOB	0.261887	0.103536
734	APOBEC2	-0.0336978	0.39955
735	APOBEC3A	0.0263031	0.190916
736	APOBEC3B	0.0390928	0.328815
737	APOBEC3C	0.600945	0.836521
738	APOBEC3D	0.442306	0.0900217
739	APOBEC3F	0.40041	0.452401
740	APOBEC3G	0.461334	0.498107
741	APOBEC3H	0.0539897	0.274503
742	APOBR	-0.0106637	0.504859
743	APOC1	0.0666768	1.12584
744	APOD	-0.0609407	1.33171
745	APOE	-0.0967684	1.26889
746	APOF	0.0966929	1.06899
747	APOL1	0.511738	0.833652
748	APOL2	0.106347	0.502877
749	APOL3	0.222317	0.639291
750	APOL4	0.0809842	1.33004
751	APOL6	0.461572	0.73473
752	APOLD1	0.0470068	0.905072
753	APOM	0.244009	0.321647
754	APOO	0.00768185	0.451171
755	APOOL	-0.0219318	0.736621
756	APP	0.0548594	0.998466
757	APPBP2	0.00567474	0.570241
758	APPL1	-0.158379	0.618888
759	APPL2	-0.041108	0.76893
760	APRT	0.146269	0.662161
761	APTR	0.277297	0.306994
762	APTX	0.152305	0.223838
763	AQP1	0.170474	0.94939
764	AQP11	0.0481633	0.822522
765	AQP3	0.454403	0.977209
766	AQP5	0.404599	0.351974
767	AQP6	0.0309777	0.126721
768	AQP7	0.141462	0.151486
769	AQP8	0.00560294	0.191901
770	AQP9	0.0692464	0.287042
771	AQR	-0.179473	0.592445
772	AR	0.000449093	0.854405
773	ARAF	0.295203	0.393726
774	ARAP1	0.302529	0.402521
775	ARAP2	-0.0630371	0.437955
776	ARAP3	0.122059	0.524798
777	ARC	0.019009	0.457158
778	ARCN1	0.14629	0.774199
779	AREG	0.109399	0.936288
780	AREL1	0.110925	0.554469
781	ARF1	0.250645	0.648295
782	ARF3	0.287873	0.614254
783	ARF4	0.0493132	0.809204
784	ARF5	0.114173	0.481408
785	ARF6	-0.0336371	0.723664
786	ARFGAP1	-0.183046	0.45227
787	ARFGAP2	0.322793	0.345567
788	ARFGAP3	0.161066	0.701201
789	ARFGEF1	0.0757252	0.638873
790	ARFGEF2	0.229611	0.774055
791	ARFGEF3	0.120885	1.22873
792	ARFIP1	0.075997	0.508224
793	ARFIP2	0.338545	0.430909
794	ARFRP1	-0.244922	0.449941
795	ARG1	0.06031	0.261408
796	ARG2	0.398516	1.33478
797	ARGLU1	0.0668324	0.594794
798	ARHGAP1	0.251151	0.589608
799	ARHGAP10	0.407772	0.527071
800	ARHGAP11A	0.312504	0.327913
801	ARHGAP11B	-0.0590096	0.0795269
802	ARHGAP12	-0.138517	0.698168
803	ARHGAP15	0.270416	0.374003
804	ARHGAP17	0.200473	0.380307
805	ARHGAP18	0.0224428	0.599468
806	ARHGAP19	0.185548	0.311033
807	ARHGAP20	0.561366	0.454808
808	ARHGAP21	-0.0197235	0.62517
809	ARHGAP22	0.223857	0.277794
810	ARHGAP23	0.590466	0.642582
811	ARHGAP24	0.399915	0.272721
812	ARHGAP25	0.206334	0.450527
813	ARHGAP26	-0.051043	0.468013
814	ARHGAP27	0.141484	0.450598
815	ARHGAP28	0.107883	0.757299
816	ARHGAP29	-0.115594	0.777961
817	ARHGAP30	0.217004	0.593293
818	ARHGAP31	0.377102	0.596489
819	ARHGAP32	0.0493347	0.737531
820	ARHGAP33	0.105911	0.506313
821	ARHGAP35	0.148646	0.636639
822	ARHGAP39	0.289266	0.438663
823	ARHGAP4	0.165404	0.576935
824	ARHGAP40	0.304548	0.583397
825	ARHGAP42	0.0586461	0.405789
826	ARHGAP44	0.280601	0.349283
827	ARHGAP45	0.0928786	0.577206
828	ARHGAP5	0.0891314	0.921288
829	ARHGAP6	0.157861	0.671671
830	ARHGAP8	-0.260923	0.302494
831	ARHGAP9	0.290944	0.489553
832	ARHGDIA	0.1247	0.592651
833	ARHGDIB	-0.00916787	1.03251
834	ARHGDIG	0.487014	0.761263
835	ARHGEF1	0.0109502	0.402049
836	ARHGEF10	-0.0146232	0.101497
837	ARHGEF10L	0.313607	0.395805
838	ARHGEF11	0.150084	0.649599
839	ARHGEF12	-0.0219162	0.831651
840	ARHGEF15	0.197662	0.454157
841	ARHGEF16	0.226204	0.412241
842	ARHGEF17	0.39517	0.611845
843	ARHGEF18	-0.000501572	0.230488
844	ARHGEF19	0.214343	0.611795
845	ARHGEF2	0.365876	0.463628
846	ARHGEF25	0.607951	0.481066
847	ARHGEF26	0.324539	0.853485
848	ARHGEF28	0.461638	0.367743
849	ARHGEF3	0.0929812	0.737693
850	ARHGEF33	0.492555	0.103057
851	ARHGEF35	-0.105064	0.631697
852	ARHGEF37	0.307214	0.68246
853	ARHGEF38	0.0366773	0.719396
854	ARHGEF39	0.359158	0.206726
855	ARHGEF4	0.0447885	0.376186
856	ARHGEF40	0.435612	0.516349
857	ARHGEF5	-0.00414197	0.328261
858	ARHGEF6	0.22173	0.6467
859	ARHGEF7	0.109286	0.539051
860	ARHGEF9	0.24069	0.353309
861	ARID1A	-0.0356941	0.728073
862	ARID1B	-0.0209423	0.455878
863	ARID2	0.00942644	0.540435
864	ARID3A	-0.0796966	0.368656
865	ARID3B	0.274998	0.237844
866	ARID3C	-0.31263	0.123285
867	ARID4A	-0.0340414	0.546551
868	ARID4B	-0.204101	0.545926
869	ARID5A	0.202365	0.835507
870	ARID5B	-0.0543872	0.801109
871	ARIH1	-0.203679	0.437739
872	ARIH2	-0.00668337	0.415389
873	ARL1	0.200636	0.639643
874	ARL10	0.439805	0.238967
875	ARL11	0.121148	0.183083
876	ARL13A	-0.03472	0.077206
877	ARL13B	-0.121495	0.566596
878	ARL14EP	-0.173981	0.460717
879	ARL15	-0.0756051	0.642373
880	ARL16	-0.153012	0.506337
881	ARL17A	-0.175896	0.127047
882	ARL17B	0.0170504	0.143091
883	ARL2	-0.039685	0.610711
884	ARL2BP	0.364559	0.179032
885	ARL3	-0.0829535	0.378338
886	ARL4A	0.359364	0.534339
887	ARL4C	0.617483	0.590094
888	ARL4D	0.634358	0.638485
889	ARL5A	0.00176802	0.553722
890	ARL5B	-0.0961482	0.55287
891	ARL6	0.00737488	0.438046
892	ARL6IP1	-0.0633518	0.677273
893	ARL6IP4	-0.0514337	0.166564
894	ARL6IP5	0.221762	0.773601
895	ARL6IP6	-0.229898	0.403934
896	ARL8A	0.0655861	0.478467
897	ARL8B	0.205866	0.611324
898	ARL9	-0.061334	0.341532
899	ARMC1	-0.105578	0.627495
900	ARMC10	-0.145813	0.436618
901	ARMC12	0.126088	0.394612
902	ARMC2	0.0755237	0.249155
903	ARMC5	-0.0783339	0.405185
904	ARMC6	0.370783	0.367063
905	ARMC7	-0.135097	0.391657
906	ARMC8	0.0170375	0.484688
907	ARMC9	-0.0489082	0.298324
908	ARMCX1	0.704902	0.867943
909	ARMCX2	0.386471	0.808914
910	ARMCX3	0.186391	0.592037
911	ARMCX4	0.538418	0.414977
912	ARMCX5	0.15306	0.361413
913	ARMCX6	0.234592	0.391426
914	ARMH1	0.248689	0.380152
915	ARMH3	0.238728	0.424017
916	ARMH4	0.367765	0.279144
917	ARMT1	-0.0952311	0.533316
918	ARNT	0.213739	0.576651
919	ARNT2	0.0133008	0.682012
920	ARPC1A	0.057054	0.462797
921	ARPC1B	0.339043	0.124979
922	ARPC2	0.2087	0.472405
923	ARPC3	0.253526	0.420925
924	ARPC4	-0.157075	0.473359
925	ARPC5	0.242709	0.415175
926	ARPC5L	0.181435	0.35441
927	ARPIN	0.171481	0.672148
928	ARPP19	0.130978	0.636728
929	ARR3	-0.154389	0.150863
930	ARRB1	0.419536	0.446949
931	ARRB2	-0.029448	0.434555
932	ARRDC1	-0.0985693	0.488953
933	ARRDC2	0.139189	0.684529
934	ARRDC3	0.191701	0.858442
935	ARRDC4	-0.148884	0.564653
936	ARRDC5	0.229667	0.1768
937	ARSA	0.23674	0.508584
938	ARSB	0.0885218	0.446652
939	ARSD	0.293475	0.531909
940	ARSG	0.258873	0.34958
941	ARSI	0.512675	0.267154
942	ARSJ	0.591168	0.612423
943	ARSK	0.294404	0.508728
944	ARSL	0.273646	0.218309
945	ART3	0.147841	0.318201
946	ART4	0.260775	0.495099
947	ART5	0.17933	0.335742
948	ARTN	-0.216952	0.390688
949	ARV1	0.152342	0.429437
950	ARVCF	0.47614	0.409244
951	ASAH1	0.0708904	0.725096
952	ASAH2	0.102174	0.104194
953	ASAH2B	0.158039	0.222737
954	ASAP1	0.296197	0.657896
955	ASAP2	0.0907282	0.767339
956	ASAP3	0.379045	0.559917
957	ASB1	0.259809	0.329344
958	ASB12	0.184581	0.170082
959	ASB13	-0.0797453	0.409094
960	ASB14	-0.139565	0.106014
961	ASB16	0.149402	0.2625
962	ASB2	0.618383	0.672591
963	ASB3	0.268416	0.403665
964	ASB4	0.118209	0.0703927
965	ASB6	-0.226519	0.24728
966	ASB7	-0.0818855	0.415309
967	ASB8	0.344004	0.434168
968	ASB9	-0.0599705	0.685909
969	ASCC1	-0.0222428	0.400611
970	ASCC2	0.0976822	0.311305
971	ASCC3	0.258852	0.636768
972	ASCL2	0.22692	0.779674
973	ASCL5	0.141744	0.135785
974	ASF1A	-0.137812	0.499826
975	ASF1B	0.474088	0.638252
976	ASGR1	0.135897	0.210728
977	ASGR2	0.217785	0.157584
978	ASH1L	0.00429293	0.762181
979	ASH2L	0.354653	0.450778
980	ASIC1	0.0204868	0.423654
981	ASIC2	0.344497	0.368084
982	ASIC3	0.199657	0.506851
983	ASIC4	-0.0819821	0.0807084
984	ASIP	0.00252484	0.168861
985	ASL	0.13568	0.346106
986	ASMT	0.111406	0.0667392
987	ASMTL	0.403926	0.335893
988	ASNS	0.339453	0.119836
989	ASNSD1	0.0424832	0.267187
990	ASPA	0.436915	0.316282
991	ASPDH	-0.151977	0.150854
992	ASPG	0.124187	0.128631
993	ASPH	0.182773	0.646232
994	ASPHD1	0.0971173	0.615579
995	ASPHD2	0.0849706	0.383706
996	ASPM	0.417807	0.323739
997	ASPN	0.130377	1.03546
998	ASPRV1	0.20951	0.246422
999	ASPSCR1	0.0397831	0.413941
1000	ASRGL1	-0.0574771	0.811454
1001	ASS1	-0.234249	1.02478
1002	ASTE1	-0.10317	0.325627
1003	ASTN1	0.137126	0.179793
1004	ASTN2	0.409824	0.826077
1005	ASXL1	0.139452	0.414862
1006	ASXL2	-0.0121737	0.586723
1007	ASXL3	0.493977	0.15692
1008	ATAD1	0.335111	0.71278
1009	ATAD2	0.0854316	0.676139
1010	ATAD2B	0.0536794	0.375076
1011	ATAD3A	0.212769	0.446038
1012	ATAD3B	0.269321	0.583778
1013	ATAD3C	0.200072	0.480233
1014	ATAD5	0.336107	0.191308
1015	ATAT1	0.336675	0.400023
1016	ATE1	0.193204	0.558265
1017	ATF1	-0.0612938	0.579843
1018	ATF2	-0.00565641	0.626087
1019	ATF3	0.326651	1.52831
1020	ATF4	0.066154	0.42042
1021	ATF5	0.156378	0.567761
1022	ATF6	0.0666289	0.632786
1023	ATF6B	0.0648645	0.571696
1024	ATF7	0.0541204	0.512757
1025	ATF7IP	0.178534	0.616189
1026	ATF7IP2	0.0254674	0.4882
1027	ATG10	0.107545	0.25717
1028	ATG101	0.128894	0.434491
1029	ATG12	-0.157561	0.38598
1030	ATG13	0.131913	0.339956
1031	ATG14	0.128577	0.351921
1032	ATG16L1	-0.0259315	0.382125
1033	ATG16L2	0.0762572	0.522866
1034	ATG2A	0.00237888	0.390245
1035	ATG2B	-0.201365	0.608055
1036	ATG3	0.100725	0.330989
1037	ATG4A	-0.0595923	0.462104
1038	ATG4B	-0.162144	0.355731
1039	ATG4C	-0.0722728	0.395327
1040	ATG4D	0.171471	0.302544
1041	ATG5	0.525026	0.474826
1042	ATG7	-0.0589624	0.288899
1043	ATG9A	0.0350788	0.706985
1044	ATG9B	0.306919	0.3264
1045	ATIC	0.142588	0.467246
1046	ATL1	-0.0426784	0.564422
1047	ATL2	0.251163	0.660127
1048	ATL3	0.0242648	0.671743
1049	ATM	0.160837	0.508129
1050	ATMIN	0.226077	0.491686
1051	ATN1	-0.00735065	0.595108
1052	ATOH7	0.256417	0.137606
1053	ATOH8	0.18141	0.656374
1054	ATOX1	-0.067446	0.45301
1055	ATP10A	0.0883043	0.319805
1056	ATP10B	0.0585432	0.0366621
1057	ATP10D	0.378457	0.605136
1058	ATP11A	0.199773	1.06046
1059	ATP11B	-0.137478	1.06196
1060	ATP11C	0.174981	0.564292
1061	ATP13A1	0.0415323	0.34231
1062	ATP13A2	0.273277	0.415022
1063	ATP13A3	-0.187103	0.689296
1064	ATP13A4	-0.132483	0.116166
1065	ATP1A1	0.11835	1.21986
1066	ATP1A2	0.609552	0.976524
1067	ATP1A3	-0.115086	0.0278958
1068	ATP1A4	0.268868	0.111836
1069	ATP1B1	0.367406	0.995913
1070	ATP1B2	0.352257	0.535983
1071	ATP1B3	-0.0238674	0.531583
1072	ATP23	-0.181912	0.26303
1073	ATP2A1	0.228172	0.471335
1074	ATP2A2	0.312175	0.870834
1075	ATP2A3	0.340723	0.848928
1076	ATP2B1	0.0558215	0.660804
1077	ATP2B2	-0.0903479	0.0492512
1078	ATP2B4	0.65368	0.930621
1079	ATP2C1	0.233365	0.880359
1080	ATP2C2	0.327259	0.701616
1081	ATP5F1A	0.172662	0.481356
1082	ATP5F1B	0.0126307	0.670111
1083	ATP5F1C	0.260923	0.426894
1084	ATP5F1D	-0.15871	0.729559
1085	ATP5F1E	0.119501	0.506215
1086	ATP5IF1	0.396959	0.427067
1087	ATP5MC1	0.148064	0.465286
1088	ATP5MC2	0.196528	0.46988
1089	ATP5MC3	0.00131937	0.488662
1090	ATP5ME	0.167776	0.730992
1091	ATP5MF	0.245094	0.509471
1092	ATP5MG	0.0590097	0.414011
1093	ATP5MGL	-0.230448	0.128312
1094	ATP5PB	0.284816	0.517695
1095	ATP5PD	0.243164	0.427406
1096	ATP5PF	0.315725	0.360837
1097	ATP5PO	0.271098	0.507518
1098	ATP6AP1	0.440167	0.536485
1099	ATP6AP2	0.321849	0.533746
1100	ATP6V0A1	0.323378	0.372064
1101	ATP6V0A2	-0.192662	0.312955
1102	ATP6V0B	0.239278	0.515246
1103	ATP6V0C	0.0902971	0.148801
1104	ATP6V0D1	0.210029	0.48673
1105	ATP6V0D2	0.217347	0.258095
1106	ATP6V0E1	0.204183	0.505275
1107	ATP6V0E2	0.357942	0.664339
1108	ATP6V1A	0.0103582	0.753211
1109	ATP6V1B2	0.113166	0.502089
1110	ATP6V1C1	-0.0154788	0.555953
1111	ATP6V1C2	0.107643	0.558252
1112	ATP6V1D	0.4795	0.508418
1113	ATP6V1E1	0.389054	0.468886
1114	ATP6V1E2	0.221016	0.37178
1115	ATP6V1F	0.0881869	0.532882
1116	ATP6V1G1	0.145318	0.678196
1117	ATP6V1G2	0.25839	0.226798
1118	ATP6V1H	0.210351	0.46474
1119	ATP7A	-0.0320572	0.669632
1120	ATP7B	0.0680801	0.500507
1121	ATP8A1	0.0321706	0.871785
1122	ATP8A2	0.307737	1.01184
1123	ATP8B1	0.231862	0.856717
1124	ATP8B2	0.254019	0.901132
1125	ATP8B3	0.112028	0.084673
1126	ATP8B4	0.321121	0.661588
1127	ATP9A	-0.0756671	0.884309
1128	ATP9B	-0.0624213	0.40792
1129	ATPAF1	0.331047	0.389777
1130	ATPAF2	0.204064	0.258106
1131	ATPSCKMT	-0.0621373	0.376437
1132	ATR	0.0347066	0.423525
1133	ATRAID	0.486729	0.43977
1134	ATRIP	0.145434	0.2736
1135	ATRN	-0.0637142	0.615251
1136	ATRNL1	0.53331	0.368004
1137	ATRX	-0.207562	0.665057
1138	ATXN1	0.0821969	0.619969
1139	ATXN10	-0.0147833	0.558073
1140	ATXN1L	0.280639	0.6178
1141	ATXN2	-0.0123228	0.599769
1142	ATXN2L	0.25091	0.616433
1143	ATXN3	0.00816325	0.270014
1144	ATXN7	0.0765484	0.484298
1145	ATXN7L1	0.0907598	0.384891
1146	ATXN7L2	0.145558	0.267577
1147	ATXN7L3	0.0295723	0.41195
1148	ATXN7L3B	-0.0126926	0.61426
1149	AUH	0.160604	0.627965
1150	AUNIP	0.312877	0.184035
1151	AUP1	-0.116999	0.43168
1152	AURKA	0.455862	0.449933
1153	AURKAIP1	0.200162	0.536404
1154	AURKB	0.50612	0.529392
1155	AURKC	-0.0793372	0.231657
1156	AUTS2	0.501528	0.481917
1157	AVEN	0.0478903	0.307596
1158	AVIL	0.211983	0.27218
1159	AVL9	0.12685	0.616651
1160	AVPI1	0.444223	0.680332
1161	AVPR1A	0.142383	0.543955
1162	AVPR2	0.0692639	0.28351
1163	AXDND1	-0.0721791	0.112406
1164	AXIN1	0.273617	0.303455
1165	AXIN2	0.576891	0.525093
1166	AXL	0.4628	0.740127
1167	AZGP1	0.540897	1.45984
1168	AZI2	-0.011589	0.460681
1169	AZIN1	-0.143974	0.886595
1170	AZIN2	0.25436	0.237702
1171	AZU1	-0.230271	0.227571
1172	B2M	0.526939	0.919907
1173	B3GALNT1	0.233391	0.571235
1174	B3GALNT2	0.288863	0.351226
1175	B3GALT1	-0.0270662	0.176407
1176	B3GALT2	0.542321	0.504331
1177	B3GALT4	0.368626	0.486183
1178	B3GALT5	0.130592	0.240629
1179	B3GALT6	0.275935	0.470793
1180	B3GAT1	-0.214225	0.929405
1181	B3GAT2	0.317512	0.0458413
1182	B3GAT3	0.210599	0.43903
1183	B3GLCT	0.0719153	0.317043
1184	B3GNT2	0.0162198	0.626842
1185	B3GNT4	0.0421146	0.140506
1186	B3GNT5	0.223807	0.609614
1187	B3GNT7	0.263591	0.396812
1188	B3GNT8	0.415449	0.368849
1189	B3GNT9	0.485983	0.633227
1190	B3GNTL1	0.358193	0.236769
1191	B4GALNT1	0.47489	0.258267
1192	B4GALNT3	0.305001	0.479737
1193	B4GALNT4	0.526766	0.853089
1194	B4GALT1	0.37496	0.719389
1195	B4GALT2	-0.175092	0.372228
1196	B4GALT3	0.417881	0.333691
1197	B4GALT4	-0.0946934	0.345396
1198	B4GALT5	0.213772	0.639691
1199	B4GALT6	0.154524	0.409329
1200	B4GALT7	-0.116677	0.393458
1201	B4GAT1	0.17509	0.504711
1202	B9D1	0.176374	0.287565
1203	B9D2	0.0661215	0.409373
1204	BAALC	0.127831	0.187814
1205	BAAT	0.231394	0.098382
1206	BABAM1	0.00907903	0.466975
1207	BABAM2	-0.132207	0.375335
1208	BACE1	0.287241	0.424768
1209	BACE2	0.15082	0.932003
1210	BACH1	-0.118569	0.754135
1211	BACH2	0.439585	0.236084
1212	BAD	0.0659092	0.476331
1213	BAG1	-0.00131153	0.410028
1214	BAG2	0.195025	0.567496
1215	BAG3	0.263013	0.595662
1216	BAG4	0.215685	0.545646
1217	BAG5	-0.0538048	0.46546
1218	BAG6	0.0360742	0.488483
1219	BAHCC1	-0.0796061	0.406833
1220	BAHD1	0.240317	0.380165
1221	BAIAP2	0.171667	0.555419
1222	BAIAP2L1	0.26344	0.503405
1223	BAIAP2L2	0.240666	0.941365
1224	BAIAP3	0.441549	0.583794
1225	BAK1	0.201921	0.323536
1226	BAMBI	0.105594	1.04183
1227	BANF1	-0.072733	0.529563
1228	BANK1	0.326162	1.2441
1229	BANP	0.229724	0.223473
1230	BAP1	0.0749885	0.361426
1231	BARD1	0.145342	0.456713
1232	BARX2	0.0896952	0.695251
1233	BASP1	0.280777	1.08433
1234	BATF	0.149512	0.8294
1235	BATF2	0.328288	0.425498
1236	BATF3	0.0361055	0.383172
1237	BAX	-0.251455	0.495271
1238	BAZ1A	-0.0641773	0.571443
1239	BAZ1B	-0.0763032	0.695593
1240	BAZ2A	0.033307	0.784129
1241	BAZ2B	0.0271345	0.383821
1242	BBC3	0.168445	0.485343
1243	BBIP1	-0.0820543	0.252807
1244	BBOF1	-0.11291	0.322166
1245	BBOX1	0.0394653	0.40271
1246	BBS1	0.0879038	0.0956507
1247	BBS10	-0.252246	0.815344
1248	BBS12	-0.137125	0.415281
1249	BBS2	0.281171	0.410131
1250	BBS4	0.11866	0.720797
1251	BBS5	0.0907758	0.267584
1252	BBS7	0.027845	0.366707
1253	BBS9	0.172299	0.30216
1254	BBX	0.206985	0.811763
1255	BCAM	0.286861	0.819279
1256	BCAN	-0.0361655	0.176189
1257	BCAP29	0.00968618	0.188794
1258	BCAP31	0.308275	0.495943
1259	BCAR1	0.0489849	0.399009
1260	BCAR3	0.355355	0.46772
1261	BCAS1	0.583603	0.93248
1262	BCAS2	0.228674	0.478686
1263	BCAS3	0.231063	0.302344
1264	BCAS4	0.327516	0.362936
1265	BCAT1	0.14809	0.439822
1266	BCAT2	0.100569	0.537344
1267	BCCIP	0.0281983	0.385296
1268	BCDIN3D	0.296094	0.285366
1269	BCHE	0.127217	0.733232
1270	BCKDHA	0.0932814	0.105813
1271	BCKDHB	0.00809468	0.642581
1272	BCKDK	-0.113706	0.345096
1273	BCL10	-0.0109046	0.37108
1274	BCL11A	0.449584	0.332089
1275	BCL11B	0.258457	0.31354
1276	BCL2	0.489987	0.569073
1277	BCL2A1	0.130655	0.648308
1278	BCL2L1	0.241652	0.442017
1279	BCL2L10	0.35602	0.5213
1280	BCL2L11	-0.166831	0.499769
1281	BCL2L12	0.128718	0.376005
1282	BCL2L13	0.178741	0.553186
1283	BCL2L14	-0.116877	0.451142
1284	BCL2L15	-0.0136363	0.179474
1285	BCL2L2	0.322116	0.544672
1286	BCL3	0.00321452	0.788613
1287	BCL6	0.200323	0.618673
1288	BCL6B	0.14262	0.527294
1289	BCL7A	0.121063	0.441838
1290	BCL7B	0.277192	0.311564
1291	BCL7C	0.00318191	0.398788
1292	BCL9	0.177726	0.765627
1293	BCL9L	0.223768	0.860343
1294	BCLAF1	-0.0951213	0.614239
1295	BCLAF3	-0.0387435	0.401391
1296	BCO1	0.295527	0.27357
1297	BCO2	0.284379	0.167792
1298	BCOR	-0.17192	0.876619
1299	BCORL1	0.142866	0.476151
1300	BCR	-0.00703595	0.42248
1301	BCS1L	0.293043	0.325323
1302	BDH1	0.493391	0.400298
1303	BDH2	0.431054	0.475287
1304	BDKRB1	0.0890917	0.100864
1305	BDKRB2	0.371138	0.435227
1306	BDNF	0.431809	0.187658
1307	BDP1	-0.148771	0.701989
1308	BEAN1	0.162474	0.148745
1309	BECN1	-0.0962959	0.667391
1310	BEGAIN	0.343615	0.208359
1311	BEND3	0.282829	0.608881
1312	BEND4	0.137499	1.02447
1313	BEND5	0.260516	0.413325
1314	BEND6	0.350593	0.220176
1315	BEND7	0.1321	0.367953
1316	BEST1	0.211506	0.201864
1317	BEST4	0.0345758	0.131869
1318	BET1	0.1417	0.39378
1319	BET1L	-0.127517	0.360345
1320	BEX1	0.566094	0.920078
1321	BEX2	0.236438	0.678812
1322	BEX3	0.442785	0.550875
1323	BEX4	0.3923	0.621149
1324	BEX5	0.30576	0.990035
1325	BFAR	-0.128044	0.390912
1326	BFSP1	-0.0671649	0.205995
1327	BFSP2	0.157749	0.0563041
1328	BGLAP	-0.154906	0.440722
1329	BGN	-0.00139205	1.14648
1330	BHLHA15	0.241742	1.02602
1331	BHLHE22	0.120877	0.156415
1332	BHLHE40	0.372935	1.07024
1333	BHLHE41	0.181336	0.910215
1334	BHMT	-0.162215	0.0636088
1335	BHMT2	0.559242	0.518078
1336	BICC1	-0.0864378	0.803998
1337	BICD1	0.284092	0.755179
1338	BICD2	0.249835	0.517494
1339	BICDL1	0.334332	0.509969
1340	BICDL2	-0.0140938	0.595673
1341	BICRA	0.0533308	0.342265
1342	BICRAL	-0.025275	0.658378
1343	BID	-0.112467	0.331558
1344	BIK	0.356783	0.581688
1345	BIN1	0.296608	0.560367
1346	BIN2	0.126944	0.512147
1347	BIN3	0.487559	0.291796
1348	BIRC2	0.1324	0.537029
1349	BIRC3	0.185185	0.822758
1350	BIRC5	0.546783	0.62991
1351	BIRC6	-0.192726	0.712195
1352	BIRC7	0.145161	0.195328
1353	BISPR	0.338161	0.345272
1354	BIVM	0.116582	0.288378
1355	BLACAT1	0.344256	0.0646074
1356	BLCAP	0.225995	0.383183
1357	BLK	0.278828	0.355221
1358	BLM	0.360043	0.217653
1359	BLMH	-0.181992	0.376014
1360	BLNK	0.00540728	0.397823
1361	BLOC1S1	0.0473326	0.676406
1362	BLOC1S2	0.0103116	0.431346
1363	BLOC1S3	0.139137	0.295626
1364	BLOC1S4	0.294598	0.320088
1365	BLOC1S5	0.112997	0.285013
1366	BLOC1S6	0.129573	0.604771
1367	BLVRA	0.280406	0.493447
1368	BLVRB	0.262681	0.59608
1369	BLZF1	0.0366024	0.515826
1370	BMERB1	0.469967	0.620185
1371	BMF	0.102749	0.564417
1372	BMI1	0.011697	0.503919
1373	BMP1	0.368513	0.406042
1374	BMP2	0.199593	0.546292
1375	BMP2K	-0.130513	0.33975
1376	BMP4	0.384145	0.781318
1377	BMP5	-0.00321883	0.940303
1378	BMP6	0.229619	0.889429
1379	BMP7	0.310829	0.827673
1380	BMP8A	-0.11635	0.457757
1381	BMP8B	0.0929926	0.498959
1382	BMPER	0.304254	0.565115
1383	BMPR1A	0.264723	0.555468
1384	BMPR1B	0.0701058	0.981553
1385	BMPR2	0.0836682	0.833539
1386	BMS1	-0.0639409	0.362724
1387	BMS1P4	-0.0885339	0.149496
1388	BMX	-0.0928432	0.511698
1389	BNC1	0.499795	0.127825
1390	BNC2	0.605862	0.400041
1391	BNIP1	0.190144	0.322674
1392	BNIP2	0.328847	0.483904
1393	BNIP3	0.149417	0.583672
1394	BNIP3L	0.563799	0.60669
1395	BNIPL	0.594759	0.613173
1396	BOC	0.526592	0.758723
1397	BOD1	-0.0239795	0.403065
1398	BOD1L1	-0.0643514	0.686312
1399	BOK	-0.155999	0.63798
1400	BOLA1	0.103229	0.425494
1401	BOLA2B	-0.250158	0.26393
1402	BOLA3	0.190431	0.352482
1403	BOP1	0.343423	0.570394
1404	BORA	-0.0583626	0.220561
1405	BORCS5	0.0267416	0.244278
1406	BORCS6	-0.117487	0.508392
1407	BORCS7	0.264027	0.470452
1408	BORCS8	-0.200081	0.374911
1409	BPGM	-0.165538	0.606995
1410	BPHL	0.305533	0.36532
1411	BPI	0.275105	0.12148
1412	BPNT1	0.331951	0.39435
1413	BPNT2	-0.0490862	0.778757
1414	BPTF	-0.0485967	0.678477
1415	BRAF	-0.0113287	0.453346
1416	BRAP	0.194233	0.33571
1417	BRAT1	-0.0805139	0.408566
1418	BRCA1	0.219747	0.306187
1419	BRCA2	0.272252	0.159376
1420	BRCC3	0.133595	0.606225
1421	BRD1	-0.0477487	0.430325
1422	BRD2	-0.0830539	0.63783
1423	BRD3	0.0201019	0.734484
1424	BRD3OS	0.0580207	0.439262
1425	BRD4	0.0911475	0.373664
1426	BRD7	0.225895	0.290515
1427	BRD8	0.211985	0.3432
1428	BRD9	-0.0406445	0.255259
1429	BRF1	0.0681698	0.25371
1430	BRF2	0.0357845	0.464311
1431	BRI3	-0.0399812	0.489519
1432	BRI3BP	0.125764	0.519667
1433	BRICD5	0.244576	0.466563
1434	BRINP1	0.156183	0.617111
1435	BRINP2	0.120387	0.041485
1436	BRIP1	0.282984	0.198906
1437	BRIX1	0.308703	0.289736
1438	BRK1	0.251855	0.467943
1439	BRMS1	-0.063453	0.450127
1440	BRMS1L	0.00492835	0.373522
1441	BROX	0.172562	0.529223
1442	BRPF1	0.140644	0.365473
1443	BRPF3	0.116013	0.802862
1444	BRSK1	-0.0761418	0.619687
1445	BRSK2	0.330138	0.79075
1446	BRWD1	-0.142697	0.483226
1447	BRWD3	0.199405	0.3687
1448	BSCL2	0.158346	0.171309
1449	BSDC1	0.122917	0.508577
1450	BSG	0.0677543	0.5574
1451	BSN	0.279386	0.135521
1452	BSPRY	0.405756	0.410301
1453	BST1	0.321816	0.277035
1454	BST2	0.292467	1.08318
1455	BTAF1	-0.017105	0.708367
1456	BTBD1	-0.136661	0.591636
1457	BTBD10	0.00148149	0.447199
1458	BTBD16	-0.0431542	0.213616
1459	BTBD18	-0.053721	0.0212108
1460	BTBD19	0.376932	0.317557
1461	BTBD2	-0.0812489	0.380474
1462	BTBD3	0.2991	0.512441
1463	BTBD6	0.138883	0.380326
1464	BTBD7	0.0365387	0.505441
1465	BTBD8	0.0710524	0.392229
1466	BTBD9	0.125504	0.444269
1467	BTC	-0.085003	0.429556
1468	BTD	0.379057	0.506869
1469	BTF3	-0.0256312	0.560825
1470	BTF3L4	0.0691414	0.436922
1471	BTG1	0.175007	0.531485
1472	BTG2	0.150909	1.07272
1473	BTG3	0.401218	0.562271
1474	BTK	0.200411	0.397525
1475	BTLA	0.115423	0.271544
1476	BTN2A1	0.403512	0.387792
1477	BTN2A2	0.407561	0.378358
1478	BTN3A1	0.395853	0.577912
1479	BTN3A2	0.322088	0.667531
1480	BTN3A3	0.364114	0.56451
1481	BTNL8	0.0897431	0.0249574
1482	BTNL9	0.0806187	0.436685
1483	BTRC	0.0548551	0.531518
1484	BUB1	0.527743	0.443495
1485	BUB1B	0.364009	0.431568
1486	BUB3	-0.00837067	0.381584
1487	BUD13	0.124232	0.277402
1488	BUD23	0.039141	0.343076
1489	BUD31	0.130931	0.310769
1490	BYSL	0.270052	0.348836
1491	BZW1	-0.0716955	0.667915
1492	BZW2	0.397826	0.496617
1493	C10orf143	-0.122812	0.204735
1494	C10orf55	0.255411	0.0527711
1495	C10orf67	-0.13894	0.0233904
1496	C10orf88	-0.110357	0.343329
1497	C11orf16	0.11206	0.161208
1498	C11orf21	0.267316	0.196123
1499	C11orf24	-0.0815195	0.432095
1500	C11orf42		0.432095
1501	C11orf54	0.440127	0.384176
1502	C11orf58	-0.0371308	0.488545
1503	C11orf65	-0.0370446	0.0951083
1504	C11orf68	0.0691894	0.39695
1505	C11orf71	0.120533	0.556997
1506	C11orf91	0.282003	0.0855312
1507	C11orf96	0.303088	1.15113
1508	C12orf42	0.162482	0.0436728
1509	C12orf43	0.21664	0.178667
1510	C12orf56	-0.109678	0.489751
1511	C12orf57	0.304371	0.703743
1512	C12orf60	0.347599	0.457113
1513	C12orf71		0.457113
1514	C12orf75	0.529034	0.765406
1515	C12orf76	0.127883	0.265861
1516	C13orf46	0.158631	0.56253
1517	C14orf119	0.351309	0.264716
1518	C14orf132	0.420398	0.665469
1519	C14orf28	0.309265	0.223492
1520	C14orf93	0.158777	0.244194
1521	C15orf39	0.152961	0.516289
1522	C15orf40	0.0210203	0.200068
1523	C15orf48	0.0602928	1.62717
1524	C15orf61	0.349417	0.272597
1525	C15orf62	0.261307	0.215089
1526	C16orf54	0.344926	0.583898
1527	C16orf74	0.2877	0.442084
1528	C16orf86	0.235905	0.389226
1529	C16orf87	0.0244495	0.303827
1530	C16orf89	0.325318	0.663194
1531	C16orf95	0.0978807	0.125357
1532	C16orf96	-0.00594444	0.120685
1533	C17orf100	0.126236	0.305909
1534	C17orf107	0.179195	0.313531
1535	C17orf113	0.0135872	0.321519
1536	C17orf58	0.191854	0.594072
1537	C17orf67	0.293491	0.287964
1538	C17orf75	0.0552109	0.263864
1539	C17orf78	0.032538	0.103684
1540	C17orf99	0.00958889	0.0762494
1541	C18orf21	0.0826466	0.327654
1542	C18orf32	-0.0405019	0.192309
1543	C18orf54	0.127078	0.180159
1544	C19orf12	0.296129	0.224033
1545	C19orf18	-0.0166711	0.68147
1546	C19orf25	-0.173011	0.372676
1547	C19orf38	0.0710344	0.350211
1548	C19orf44	-0.108992	0.234431
1549	C19orf47	-0.145051	0.254318
1550	C19orf53	-0.144606	0.515451
1551	C19orf67	-0.0277355	0.0944722
1552	C19orf73	0.069104	0.527045
1553	C19orf81	0.0396286	0.957542
1554	C19orf84	0.0241058	0.0503301
1555	C1D	0.399671	0.354669
1556	C1GALT1	-0.0162813	0.384561
1557	C1GALT1C1	0.174972	0.524473
1558	C1GALT1C1L	0.316508	0.337499
1559	C1QA	0.175965	0.896537
1560	C1QB	0.101769	0.931706
1561	C1QBP	0.0985553	0.507559
1562	C1QC	0.168945	0.91925
1563	C1QL1	0.121708	0.401122
1564	C1QL3	-0.365934	0.51063
1565	C1QL4	0.0770089	0.0712322
1566	C1QTNF1	0.412247	0.748736
1567	C1QTNF12	-0.0828993	0.262298
1568	C1QTNF2	0.164755	0.436847
1569	C1QTNF3	0.33623	0.962854
1570	C1QTNF4	0.188909	0.333259
1571	C1QTNF6	0.088389	0.405945
1572	C1QTNF7	0.388878	0.680783
1573	C1R	0.271999	1.01118
1574	C1RL	0.251133	0.668139
1575	C1S	0.389255	1.07158
1576	C1orf115	0.298857	0.798092
1577	C1orf116	0.208739	0.836164
1578	C1orf122	0.0916284	0.579051
1579	C1orf127	0.0496685	0.108534
1580	C1orf131	0.295998	0.270563
1581	C1orf146	0.0703343	0.0730207
1582	C1orf159	0.223903	0.361632
1583	C1orf162	0.0997973	0.432119
1584	C1orf174	-0.0686213	0.321684
1585	C1orf198	0.152064	0.52649
1586	C1orf21	0.229565	0.56471
1587	C1orf210	0.184738	0.495448
1588	C1orf216	0.178983	0.40935
1589	C1orf220	0.0705124	0.165243
1590	C1orf226	-0.094116	0.618838
1591	C1orf35	0.153315	0.407137
1592	C1orf43	0.0886757	0.687926
1593	C1orf50	0.159841	0.257584
1594	C1orf52	0.144647	0.256487
1595	C1orf53	0.188533	0.535437
1596	C1orf54	0.461973	0.579668
1597	C1orf56	0.34019	0.352765
1598	C1orf74	0.235491	0.388845
1599	C2	0.168333	0.646502
1600	C20orf144	0.0537172	0.246935
1601	C20orf202	0.0562025	0.066608
1602	C20orf204	0.435433	0.178577
1603	C20orf96	0.116368	0.549093
1604	C21orf58	0.468257	0.33901
1605	C21orf91	0.254855	0.351875
1606	C22orf15	0.12971	0.147396
1607	C22orf23	-0.157256	0.358728
1608	C22orf31	0.295359	0.157096
1609	C22orf39	0.436184	0.3657
1610	C2CD2	0.111212	0.464511
1611	C2CD2L	0.125886	0.363034
1612	C2CD3	-0.0380214	0.544337
1613	C2CD4A	0.106978	0.744458
1614	C2CD4B	-0.0182562	0.780634
1615	C2CD4C	0.04717	0.527256
1616	C2CD4D	0.270037	0.440893
1617	C2CD5	0.0498617	0.491347
1618	C2CD6	0.172566	0.0965669
1619	C2orf15	0.260366	0.331368
1620	C2orf42	-0.059479	0.321987
1621	C2orf49	-0.00508938	0.357667
1622	C2orf66	0.228784	0.151441
1623	C2orf68	0.00135664	0.285694
1624	C2orf69	-0.108445	0.582154
1625	C2orf72	0.247243	1.21146
1626	C2orf74	0.212691	0.172886
1627	C2orf76	0.116206	0.373246
1628	C2orf81	-0.0639893	0.184083
1629	C2orf88	0.494839	0.438797
1630	C2orf92	0.377431	0.261302
1631	C3	0.125428	1.31872
1632	C3AR1	0.105266	0.601181
1633	C3orf18	0.434893	0.404302
1634	C3orf20	0.045706	0.065245
1635	C3orf33	-0.134325	0.259111
1636	C3orf38	-0.301862	0.501989
1637	C3orf49	0.0470519	0.0445116
1638	C3orf52	0.268643	0.383939
1639	C3orf62	0.263064	0.295348
1640	C3orf70	0.664051	0.559978
1641	C3orf80	-0.0477593	0.407407
1642	C4A	-0.00739535	0.997813
1643	C4B	0.0904603	1.02244
1644	C4BPA	0.0043266	0.209079
1645	C4BPB	0.101184	0.060092
1646	C4orf19	0.337475	0.474627
1647	C4orf3	0.408503	0.515548
1648	C4orf33	0.304893	0.286083
1649	C4orf46	0.0993469	0.376199
1650	C4orf50	0.246897	0.100182
1651	C5	-0.140019	0.567239
1652	C5AR1	0.0709007	0.645866
1653	C5AR2	-0.0727191	0.106454
1654	C5orf15	0.00899668	0.653681
1655	C5orf22	-0.0591073	0.574135
1656	C5orf24	-0.100461	0.748706
1657	C5orf34	0.39543	0.208757
1658	C5orf58	-0.0416771	0.0606789
1659	C5orf63	0.249661	0.24625
1660	C6	0.0705454	0.380127
1661	C6orf120	-0.137663	0.732491
1662	C6orf132	0.199035	0.545491
1663	C6orf136	0.033248	0.309888
1664	C6orf141	0.164794	0.325046
1665	C6orf163	-0.034794	0.236484
1666	C6orf226	0.106364	0.596278
1667	C6orf47	0.257391	0.381616
1668	C6orf52	0.146754	0.515769
1669	C6orf58	-0.00751339	0.0971589
1670	C6orf62	0.0605474	0.563035
1671	C6orf89	0.279066	0.532897
1672	C7	0.540722	1.13014
1673	C7orf25	-0.100926	0.104074
1674	C7orf50	-0.219507	0.49545
1675	C7orf57	-0.0128079	0.24771
1676	C8G	0.0599708	0.32347
1677	C8orf33	0.0625902	0.486807
1678	C8orf48	0.0975338	0.118047
1679	C8orf58	0.131552	0.355279
1680	C8orf76	-0.0850619	0.321847
1681	C8orf82	-0.0967078	0.630445
1682	C8orf88	0.760116	0.488676
1683	C9orf152	0.318452	0.796132
1684	C9orf153	0.109815	0.083513
1685	C9orf163	0.546858	0.241591
1686	C9orf40	0.0688117	0.337606
1687	C9orf43	0.415571	0.212293
1688	C9orf50	0.027886	0.093233
1689	C9orf72	-0.00832042	0.536626
1690	C9orf78	0.190905	0.389952
1691	C9orf85	0.143922	0.381372
1692	CA11	0.606042	0.577841
1693	CA12	0.361714	0.638843
1694	CA13	0.225413	0.559851
1695	CA14	0.489301	0.456197
1696	CA2	0.0949448	0.696089
1697	CA3	-0.172972	1.25183
1698	CA4	0.0379899	0.450209
1699	CA5B	-0.0391785	0.493492
1700	CA8	-6.57155e-06	0.530546
1701	CA9	-0.167354	0.206573
1702	CAAP1	0.0183536	0.503708
1703	CAB39	-0.0319274	0.771962
1704	CAB39L	0.0646296	0.744049
1705	CABCOCO1	0.116116	0.793499
1706	CABIN1	-0.0702341	0.472669
1707	CABLES1	0.324954	0.335223
1708	CABLES2	0.258888	0.349486
1709	CABP1	0.342652	0.166653
1710	CABP4	0.544435	0.398999
1711	CABP7	-0.204834	0.0847531
1712	CABYR	0.372033	0.174749
1713	CACFD1	0.319784	0.450141
1714	CACHD1	0.565505	0.583302
1715	CACNA1A	0.16939	0.0774904
1716	CACNA1C	0.492882	0.429703
1717	CACNA1D	0.31071	1.14699
1718	CACNA1E	0.0559606	0.0166243
1719	CACNA1F	-0.119019	0.0444592
1720	CACNA1G	0.38526	0.487781
1721	CACNA1H	0.305036	0.883801
1722	CACNA1I	0.161739	0.201724
1723	CACNA1S	-0.0837578	0.175364
1724	CACNA2D1	0.600176	0.864912
1725	CACNA2D2	0.273143	0.442414
1726	CACNA2D3	0.449768	0.308753
1727	CACNA2D4	0.203282	0.121481
1728	CACNB1	0.422734	0.358472
1729	CACNB2	0.411368	0.282272
1730	CACNB3	0.177753	0.47838
1731	CACNB4	0.507859	0.25321
1732	CACNG4	0.649738	1.09257
1733	CACNG8	-0.102857	0.0432342
1734	CACTIN	-0.0286146	0.252764
1735	CACUL1	-0.168019	0.426473
1736	CACYBP	-0.179335	0.476176
1737	CAD	0.209936	0.470299
1738	CADM1	-0.156508	0.815612
1739	CADM2	0.111513	0.627456
1740	CADM3	0.198431	0.393471
1741	CADM4	0.529618	0.44916
1742	CADPS	0.349166	0.843732
1743	CADPS2	0.0764003	0.677486
1744	CAGE1	0.157977	0.0440134
1745	CAHM	0.187881	0.401536
1746	CALB1	-0.00685332	0.0502937
1747	CALB2	-0.116458	0.204432
1748	CALCB	-0.0288	0.104632
1749	CALCOCO1	0.192603	0.519931
1750	CALCOCO2	0.172789	0.513346
1751	CALCR	-0.0549226	0.0304222
1752	CALCRL	0.117764	0.85216
1753	CALD1	0.581037	1.0509
1754	CALHM2	0.446687	0.567513
1755	CALHM5	0.420885	0.266309
1756	CALHM6	0.147118	0.318788
1757	CALM1	0.518501	0.706607
1758	CALM2	-0.0798463	0.480571
1759	CALM3	0.149406	0.555033
1760	CALML4	-0.110783	0.0369315
1761	CALML6	-0.158885	0.290067
1762	CALN1	0.0706254	0.287625
1763	CALR	0.25761	0.724155
1764	CALU	-0.0208339	0.824982
1765	CALY	0.13664	0.165374
1766	CAMK1	0.345282	0.40803
1767	CAMK1D	0.367753	0.612526
1768	CAMK1G	0.323079	0.36851
1769	CAMK2A	0.370877	0.252187
1770	CAMK2B	0.304255	0.702588
1771	CAMK2D	-0.000346379	0.680229
1772	CAMK2G	0.528786	0.498904
1773	CAMK2N1	0.152882	1.14992
1774	CAMK2N2	0.253871	0.564395
1775	CAMK4	0.227528	0.495909
1776	CAMKK1	-0.0878634	0.436532
1777	CAMKK2	0.344191	0.963038
1778	CAMKMT	-0.053901	0.234939
1779	CAMLG	0.105212	0.313452
1780	CAMP	0.160304	0.29473
1781	CAMSAP1	-0.11075	0.642312
1782	CAMSAP2	0.128964	0.631374
1783	CAMSAP3	0.286832	0.415138
1784	CAMTA1	0.140418	0.222769
1785	CAMTA2	0.146904	0.464455
1786	CAND1	-0.0906222	0.623234
1787	CAND2	0.644296	0.414873
1788	CANT1	0.177492	0.713509
1789	CANX	0.0368691	0.956941
1790	CAP1	0.262879	0.698564
1791	CAP2	0.529294	0.831861
1792	CAPG	0.426162	0.844507
1793	CAPN1	0.363454	0.46682
1794	CAPN10	0.0262769	0.332441
1795	CAPN11	0.0579849	0.115497
1796	CAPN12	0.142423	0.208353
1797	CAPN13	0.12223	0.545664
1798	CAPN14	-0.264512	0.123186
1799	CAPN15	0.416571	0.36308
1800	CAPN2	0.0752959	0.720546
1801	CAPN3	0.169188	0.164634
1802	CAPN5	0.150449	0.9783
1803	CAPN6	0.495092	0.789998
1804	CAPN7	-0.0799028	0.634147
1805	CAPN8	0.346915	0.430031
1806	CAPN9	0.0140076	0.551304
1807	CAPNS1	0.228011	0.532464
1808	CAPRIN1	-0.0327045	0.80433
1809	CAPRIN2	0.206991	0.364478
1810	CAPS	0.0493651	0.816566
1811	CAPS2	0.277164	0.253034
1812	CAPZA1	-0.150932	0.703834
1813	CAPZA2	0.112665	0.60512
1814	CAPZB	0.510733	0.431328
1815	CARD10	-0.0756183	0.456901
1816	CARD11	0.263354	0.479104
1817	CARD14	0.122396	0.254426
1818	CARD16	0.362545	0.479996
1819	CARD19	0.144848	0.362782
1820	CARD6	0.169091	0.40535
1821	CARD8	0.0609266	0.267579
1822	CARD9	0.211918	0.307309
1823	CARF	0.326588	0.251113
1824	CARHSP1	0.0279379	0.36318
1825	CARM1	0.0268964	0.630711
1826	CARMIL1	0.00321909	0.583046
1827	CARMIL2	0.114993	0.356722
1828	CARMIL3	0.416136	0.135353
1829	CARNMT1	-0.0784242	0.511389
1830	CARNS1	0.245452	0.213457
1831	CARS1	-0.0478157	0.293252
1832	CARS2	0.0702013	0.349454
1833	CASC11	0.191192	0.213421
1834	CASC18	0.308169	0.0729934
1835	CASC2	0.0451852	0.142666
1836	CASC3	0.0304364	0.557081
1837	CASC8	0.438317	0.321001
1838	CASC9	0.0732799	0.230314
1839	CASD1	-0.171619	0.706726
1840	CASK	-0.027619	0.390312
1841	CASKIN1	0.51164	0.356468
1842	CASKIN2	0.127902	0.49785
1843	CASP1	0.35503	0.551702
1844	CASP10	0.172134	0.451945
1845	CASP2	0.000157565	0.609934
1846	CASP3	0.0272153	0.453068
1847	CASP4	0.41514	0.423699
1848	CASP5	0.131187	0.0592907
1849	CASP6	0.240456	0.394045
1850	CASP7	0.242341	0.675851
1851	CASP8	-0.0455319	0.536525
1852	CASP8AP2	0.113409	0.562214
1853	CASP9	0.0750662	0.289093
1854	CASQ1	0.582048	0.742531
1855	CASQ2	0.471893	0.755313
1856	CASR	0.0243723	0.0205606
1857	CASS4	0.171209	0.217386
1858	CAST	0.209329	0.672654
1859	CASTOR1	0.144374	0.123442
1860	CASTOR2	0.249127	0.358917
1861	CASZ1	0.00836799	0.549011
1862	CAT	0.327996	0.802189
1863	CATIP	-0.0567739	0.290501
1864	CATSPER1	-0.234654	0.0905336
1865	CATSPER2	0.281632	0.261263
1866	CATSPER3	0.0820778	0.212773
1867	CATSPERB	0.159397	0.302466
1868	CATSPERE	0.163299	0.133392
1869	CATSPERG	0.00858335	0.184757
1870	CAV1	0.658388	0.962354
1871	CAV2	0.655993	0.633624
1872	CAVIN1	0.640766	0.854508
1873	CAVIN2	0.425836	1.08514
1874	CAVIN3	0.318126	0.665671
1875	CAVIN4	-0.141949	0.428623
1876	CBARP	0.135587	0.232691
1877	CBFA2T2	0.00744445	0.68165
1878	CBFA2T3	-0.116622	0.490046
1879	CBFB	-0.0943635	0.530722
1880	CBL	0.270563	0.537655
1881	CBLB	0.033562	0.455925
1882	CBLC	0.120674	0.895365
1883	CBLL1	0.0883508	0.753313
1884	CBLN1	0.0348101	0.258788
1885	CBLN3	0.167051	0.426844
1886	CBLN4	-0.112545	0.105319
1887	CBR1	0.509585	0.516681
1888	CBR3	0.152422	0.821866
1889	CBR4	0.0453783	0.580785
1890	CBS	5.00996e-06	0.496451
1891	CBX1	-0.0757348	0.585444
1892	CBX2	0.499966	0.543979
1893	CBX3	0.216476	0.476448
1894	CBX4	0.0235274	0.592837
1895	CBX5	0.0609106	0.645247
1896	CBX6	0.0607966	0.667989
1897	CBX7	0.54392	0.508264
1898	CBX8	0.523996	0.38163
1899	CBY1	0.17928	0.376412
1900	CBY3	0.116496	0.128723
1901	CC2D1A	-0.226184	0.352841
1902	CC2D1B	0.0428216	0.29407
1903	CC2D2A	0.146076	0.419484
1904	CC2D2B	0.293687	0.0896953
1905	CCAR1	0.0492459	0.542131
1906	CCAR2	0.338029	0.341026
1907	CCBE1	0.405169	0.360591
1908	CCDC102A	0.215866	0.460593
1909	CCDC102B	0.186187	0.261079
1910	CCDC106	0.117494	0.422904
1911	CCDC107	0.196258	0.452753
1912	CCDC110	0.146076	0.477487
1913	CCDC112	-0.0172947	0.535379
1914	CCDC115	0.309747	0.376453
1915	CCDC116	0.185159	0.108674
1916	CCDC117	-0.0931287	0.54704
1917	CCDC12	-0.130094	0.412589
1918	CCDC120	0.286895	0.455639
1919	CCDC121	-0.121931	0.464443
1920	CCDC122	0.241688	0.291595
1921	CCDC124	-0.198068	0.537704
1922	CCDC125	0.183853	0.497177
1923	CCDC126	-0.159821	0.432308
1924	CCDC127	-0.0612926	0.240218
1925	CCDC13	-0.172135	0.0618589
1926	CCDC134	0.0626277	0.435584
1927	CCDC136	0.360834	0.508313
1928	CCDC137	-0.164533	0.394661
1929	CCDC138	0.15777	0.336655
1930	CCDC14	0.275887	0.46968
1931	CCDC141	0.0566452	0.397937
1932	CCDC142	0.313055	0.299045
1933	CCDC144A	-0.0795998	0.262991
1934	CCDC146	0.207686	0.404498
1935	CCDC148	0.012402	0.155276
1936	CCDC149	0.332338	0.344015
1937	CCDC15	-0.128592	0.414933
1938	CCDC150	0.454662	0.0706909
1939	CCDC152	0.116332	0.193989
1940	CCDC154	-0.1042	0.778904
1941	CCDC157	0.305666	0.200119
1942	CCDC158	0.168136	0.160655
1943	CCDC159	0.132426	0.517604
1944	CCDC163	0.19746	0.502609
1945	CCDC167	0.13389	0.556985
1946	CCDC168	-0.0676732	0.0168146
1947	CCDC17	0.165315	0.446153
1948	CCDC170	-0.0352395	0.39354
1949	CCDC171	0.0896365	0.122595
1950	CCDC174	0.280516	0.219641
1951	CCDC18	0.340186	0.159751
1952	CCDC180	0.299049	0.120268
1953	CCDC181	0.388396	0.162376
1954	CCDC183	-0.0512444	0.330597
1955	CCDC184	0.0778339	0.347567
1956	CCDC186	-0.047191	0.879627
1957	CCDC187	0.128142	0.278571
1958	CCDC188	-0.00613129	0.27837
1959	CCDC191	-0.0044435	0.308732
1960	CCDC192	0.162869	0.0999091
1961	CCDC194	-0.026353	0.243382
1962	CCDC196	0.0320213	0.0270947
1963	CCDC200	0.138107	0.133767
1964	CCDC22	0.208709	0.365961
1965	CCDC24	0.0770658	0.492011
1966	CCDC25	0.299373	0.410223
1967	CCDC26	0.188571	0.078399
1968	CCDC28A	0.455009	0.499865
1969	CCDC28B	0.0954277	0.37822
1970	CCDC3	0.270257	0.802058
1971	CCDC30	0.110839	0.14079
1972	CCDC32	-0.0434284	0.258357
1973	CCDC34	0.344182	0.394238
1974	CCDC38	0.0280315	0.0255379
1975	CCDC39	-0.037096	0.0270028
1976	CCDC40	0.508121	0.36872
1977	CCDC43	-0.000284086	0.372567
1978	CCDC47	0.098507	0.689555
1979	CCDC50	-0.0677318	0.639346
1980	CCDC51	0.297007	0.398232
1981	CCDC57	0.137172	0.4289
1982	CCDC59	0.0409598	0.280975
1983	CCDC6	-0.0604673	0.664148
1984	CCDC61	0.115548	0.415302
1985	CCDC62	0.0241912	0.0714088
1986	CCDC65	-0.112914	0.313495
1987	CCDC66	-0.0780923	0.30079
1988	CCDC68	0.530122	0.456133
1989	CCDC69	0.567004	0.655383
1990	CCDC7	0.0364569	0.171321
1991	CCDC71	-0.0364851	0.348345
1992	CCDC71L	0.208965	0.42983
1993	CCDC73	0.204275	0.0443668
1994	CCDC74A	0.14323	0.817322
1995	CCDC74B	0.363933	0.660781
1996	CCDC77	0.200038	0.280849
1997	CCDC78	0.420093	0.719856
1998	CCDC8	0.601124	0.610583
[truncated: 14,060 more rows]

## Sheet: two heads
	gene	pcc	rmse
0	A1BG	-0.116363	0.0558111
1	A2M	0.201252	0.979602
2	A2ML1	0.36973	0.343672
3	A4GALT	0.293736	0.644059
4	AAAS	-0.0580069	0.255074
5	AACS	0.157023	0.336039
6	AADAT	0.172427	0.771163
7	AAGAB	0.208133	0.302072
8	AAK1	-0.0311801	0.557714
9	AAMDC	0.00887395	0.418973
10	AAMP	0.259177	0.271356
11	AANAT	-0.17656	0.0474423
12	AAR2	0.121358	0.220166
13	AARD	-0.00549463	0.279833
14	AARS1	0.206434	0.399218
15	AARS2	0.0832538	0.218367
16	AARSD1	0.175318	0.219715
17	AASDH	0.0603724	0.321026
18	AASDHPPT	-0.0638223	0.423371
19	AASS	0.112043	0.46019
20	AATBC	0.230574	0.369259
21	AATF	-0.0809813	0.27421
22	AATK	0.00735331	0.442321
23	ABAT	0.176828	0.834635
24	ABCA1	0.0273597	0.622124
25	ABCA10	0.156721	0.149361
26	ABCA12	-0.0508704	0.180634
27	ABCA13	-0.0437157	0.0396676
28	ABCA2	0.196466	0.471186
29	ABCA3	0.1652	0.501812
30	ABCA4	-0.103711	0.105466
31	ABCA5	-0.0212287	0.34589
32	ABCA6	0.382147	0.187246
33	ABCA7	-0.135017	0.447603
34	ABCA8	0.505567	0.484131
35	ABCA9	0.215122	0.194326
36	ABCB1	0.387498	0.544607
37	ABCB10	-0.127932	0.420473
38	ABCB11	-0.0366848	0.0813142
39	ABCB4	0.31114	0.117608
40	ABCB5	0.046935	0.24137
41	ABCB6	0.377835	0.119301
42	ABCB7	-0.00920237	0.274164
43	ABCB8	0.314918	0.347072
44	ABCB9	-0.0699022	0.185383
45	ABCC1	-0.0104694	0.459508
46	ABCC10	0.00142564	0.331699
47	ABCC11	0.179172	1.02046
48	ABCC2	0.339631	0.0845727
49	ABCC3	0.422374	0.62718
50	ABCC4	0.128265	1.12484
51	ABCC5	0.391086	0.494714
52	ABCC6	0.382589	0.452644
53	ABCC8	-0.146835	0.461758
54	ABCC9	0.598957	0.456174
55	ABCD1	0.28891	0.346728
56	ABCD2	0.320476	0.112588
57	ABCD3	0.176973	0.37851
58	ABCD4	-0.172398	0.303681
59	ABCE1	-0.0221532	0.474049
60	ABCF1	-0.00908614	0.273288
61	ABCF2	0.07062	0.297283
62	ABCF3	0.174317	0.273809
63	ABCG1	0.0541897	0.556734
64	ABCG2	0.566442	0.534017
65	ABCG4	0.0828933	0.0429548
66	ABCG5		0.0429548
67	ABCG8	-0.104494	0.0513173
68	ABHD1	0.239497	0.393716
69	ABHD10	0.354463	0.380018
70	ABHD11	0.0320185	0.600231
71	ABHD12	0.0213744	0.69058
72	ABHD12B	-0.157785	0.0343206
73	ABHD13	0.24221	0.318717
74	ABHD14A	0.135223	0.565395
75	ABHD14B	0.346315	0.414534
76	ABHD15	0.0566871	0.352787
77	ABHD16A	0.129353	0.156872
78	ABHD17A	-0.134821	0.389878
79	ABHD17B	-0.0242074	0.52784
80	ABHD17C	0.186308	0.562401
81	ABHD18	0.167555	0.272431
82	ABHD2	-0.0974816	1.12411
83	ABHD3	0.242362	0.461513
84	ABHD4	0.12293	0.483479
85	ABHD5	0.159784	0.295115
86	ABHD6	0.602833	0.300098
87	ABHD8	-0.0997423	0.480223
88	ABI1	0.0117552	0.411199
89	ABI2	-0.166717	0.325017
90	ABI3	0.182572	0.558468
91	ABI3BP	0.363142	0.553867
92	ABITRAM	-0.00310347	0.440748
93	ABL1	-0.0138443	0.459006
94	ABL2	0.111305	0.278025
95	ABLIM1	0.229875	0.726936
96	ABLIM2	-0.0805506	0.338868
97	ABLIM3	0.102278	0.562455
98	ABO	0.515765	0.677035
99	ABR	0.333302	0.339235
100	ABRACL	0.0422881	0.67318
101	ABRAXAS1	0.168025	0.247012
102	ABRAXAS2	-0.073493	0.378346
103	ABT1	-0.0622886	0.303571
104	ABTB1	-0.165851	0.613085
105	ABTB2	0.0500197	0.605898
106	ACAA1	0.496485	0.384337
107	ACAA2	0.528745	0.528378
108	ACACA	0.170525	0.743354
109	ACACB	0.473287	0.454052
110	ACAD10	0.342118	0.296708
111	ACAD11	0.0766458	0.0849893
112	ACAD8	-0.0256717	0.894373
113	ACAD9	0.084407	0.256555
114	ACADL	0.506882	0.914542
115	ACADM	-0.159047	0.535576
116	ACADS	0.0864777	0.58678
117	ACADSB	-0.149904	0.774475
118	ACADVL	0.0294621	0.505957
119	ACAN	0.0863372	0.385846
120	ACAP1	0.0870842	0.516263
121	ACAP2	0.0455129	0.436631
122	ACAP3	0.143595	0.492474
123	ACAT1	0.18877	0.488581
124	ACAT2	0.224522	0.645432
125	ACBD3	-0.260422	0.533285
126	ACBD4	-0.0996586	0.488289
127	ACBD5	0.0319235	0.494109
128	ACBD6	0.0667965	0.303364
129	ACBD7	0.310645	0.322476
130	ACCS	-0.145269	0.628937
131	ACD	-0.158327	0.419568
132	ACE	0.358964	0.508416
133	ACE2	0.185984	0.0930715
134	ACER2	-0.0899261	0.894522
135	ACER3	-0.093024	0.788327
136	ACHE	0.0272885	0.771856
137	ACIN1	0.168288	0.281149
138	ACKR1	0.0567394	1.19983
139	ACKR2	0.149881	0.308912
140	ACKR3	0.464212	0.680594
141	ACKR4	0.10108	0.0726296
142	ACLY	-0.013378	0.842377
143	ACMSD	0.0204168	0.0448073
144	ACO1	0.276578	0.40019
145	ACO2	-0.171236	0.490324
146	ACOT1	0.269109	0.491168
147	ACOT11	0.47595	0.308835
148	ACOT13	0.168113	0.372394
149	ACOT2	0.237247	0.468748
150	ACOT4	0.000540685	0.349497
151	ACOT7	0.0218469	0.349944
152	ACOT8	0.427605	0.292848
153	ACOT9	0.173327	0.286493
154	ACOX1	0.19521	0.419897
155	ACOX2	0.450394	0.599519
156	ACOX3	0.423025	0.418815
157	ACOXL	0.199808	0.389282
158	ACP1	0.0251014	0.324579
159	ACP2	0.589449	0.373316
160	ACP3	0.582965	1.27826
161	ACP4	0.148022	0.30112
162	ACP5	0.282679	1.11718
163	ACP6	0.285932	0.340544
164	ACP7	0.225499	0.128247
165	ACR	-0.0546516	0.0986168
166	ACRBP	0.270388	0.299112
167	ACRV1	0.457537	0.286058
168	ACSBG1	0.239102	0.232049
169	ACSBG2	-0.00687545	0.0549297
170	ACSF2	0.334636	0.775799
171	ACSF3	-0.283461	0.353481
172	ACSL1	-0.0565821	0.866676
173	ACSL3	0.0473554	0.807733
174	ACSL4	0.666936	0.50239
175	ACSL5	0.0334271	1.15839
176	ACSL6	0.23914	0.0720581
177	ACSM1	0.204728	1.79189
178	ACSM3	0.144402	0.859415
179	ACSM4	0.13185	0.0384801
180	ACSM5	0.188529	0.114531
181	ACSS1	0.20818	0.474956
182	ACSS2	0.526969	0.281169
183	ACSS3	0.627507	0.304959
184	ACTA1	0.469641	1.44321
185	ACTA2	0.558376	0.970562
186	ACTB	0.231766	0.458598
187	ACTC1	0.564067	1.21097
188	ACTG1	-0.10967	0.433269
189	ACTG2	0.566775	1.25649
190	ACTL6A	-0.160273	0.53105
191	ACTN1	0.529178	0.5824
192	ACTN2	0.240613	0.872388
193	ACTN3	0.016312	0.0655845
194	ACTN4	0.37343	0.465271
195	ACTR10	0.182262	0.245407
196	ACTR1A	-0.000681916	0.348004
197	ACTR1B	-0.101488	0.258767
198	ACTR2	-0.0256076	0.571745
199	ACTR3	0.189402	0.386269
200	ACTR3B	0.458766	0.245716
201	ACTR3C	0.125633	0.182988
202	ACTR5	0.172277	0.24876
203	ACTR6	-0.0607202	0.308408
204	ACTR8	-0.0651222	0.36228
205	ACTRT3	0.311108	0.234131
206	ACVR1	0.213179	0.468194
207	ACVR1B	0.334027	0.443528
208	ACVR1C	0.263943	0.0791039
209	ACVR2A	0.121371	0.356515
210	ACVR2B	0.072998	0.296983
211	ACVRL1	0.250108	0.49782
212	ACY1	0.418523	0.117369
213	ACY3	0.0555572	0.78234
214	ACYP1	-0.0561619	0.43338
215	ACYP2	0.0741018	0.279538
216	ADA	0.269521	0.382393
217	ADA2	0.380897	0.647356
218	ADAD2	0.141208	0.115986
219	ADAM10	0.14788	0.57468
220	ADAM11	0.030919	0.273951
221	ADAM12	0.373821	0.224225
222	ADAM15	0.214974	0.370895
223	ADAM17	0.133579	0.318572
224	ADAM19	0.533287	0.433839
225	ADAM20	-0.131141	0.0592768
226	ADAM21	0.014937	0.335358
227	ADAM22	0.365666	0.594566
228	ADAM23	0.418829	0.24328
229	ADAM28	0.397214	0.445628
230	ADAM32	0.166794	0.251267
231	ADAM33	0.464991	0.655379
232	ADAM8	0.0551867	0.500307
233	ADAM9	-0.141137	0.821523
234	ADAMDEC1	0.15238	0.619107
235	ADAMTS1	0.580862	1.02875
236	ADAMTS10	0.304846	0.454733
237	ADAMTS12	0.271755	0.261734
238	ADAMTS13	0.334589	0.378644
239	ADAMTS14	0.157938	0.156621
240	ADAMTS15	0.467221	0.278788
241	ADAMTS16	-0.0544619	0.152371
242	ADAMTS17	0.100533	0.175032
243	ADAMTS18	0.0791552	0.0956423
244	ADAMTS2	0.301547	0.66099
245	ADAMTS3	-0.16154	0.421386
246	ADAMTS4	0.255792	0.918989
247	ADAMTS5	0.547834	0.378379
248	ADAMTS6	0.0941384	0.231122
249	ADAMTS7	0.184665	0.192924
250	ADAMTS8	0.467458	0.47468
251	ADAMTS9	0.368784	0.500536
252	ADAMTSL1	0.0366839	1.0578
253	ADAMTSL2	0.299453	0.549364
254	ADAMTSL3	0.274511	0.649039
255	ADAMTSL4	0.387053	0.377971
256	ADAMTSL5	0.0503513	0.344279
257	ADAP1	-0.120044	0.365082
258	ADAP2	0.180901	0.367847
259	ADAR	0.121534	0.486804
260	ADARB1	0.148746	0.39276
261	ADARB2	0.111738	0.578407
262	ADAT1	-0.0353899	0.466555
263	ADAT2	-0.0327172	0.384572
264	ADAT3	0.0934234	0.371014
265	ADCK1	0.189787	0.293069
266	ADCK2	0.250668	0.318009
267	ADCK5	0.113278	0.549044
268	ADCY1	0.117247	0.682323
269	ADCY10	-0.00417778	0.142539
270	ADCY2	0.447871	0.511849
271	ADCY3	0.507472	0.507585
272	ADCY4	0.0891884	0.44896
273	ADCY5	0.501806	0.639772
274	ADCY6	0.100849	0.551664
275	ADCY7	0.37865	0.301045
276	ADCY9	0.311811	0.395999
277	ADCYAP1	0.321201	0.254855
278	ADCYAP1R1	0.620663	0.208687
279	ADD1	0.23939	0.311811
280	ADD2	0.177352	0.448546
281	ADD3	0.302718	0.856358
282	ADGRA2	0.583655	0.830535
283	ADGRA3	-0.299048	0.421669
284	ADGRB1	-0.0481994	0.397526
285	ADGRB2	0.199813	0.347804
286	ADGRB3	0.493289	0.154384
287	ADGRD1	0.28343	0.38102
288	ADGRE1	0.124533	0.126447
289	ADGRE2	0.291744	0.259097
290	ADGRE3	0.252509	0.138645
291	ADGRE5	-0.0411601	0.701545
292	ADGRF1	-0.0326832	1.22704
293	ADGRF3	-0.255978	0.0908291
294	ADGRF5	-0.0372578	1.42915
295	ADGRG1	0.108933	0.50509
296	ADGRG2	0.338118	0.466374
297	ADGRG3	-0.0789666	0.138069
298	ADGRG5	0.25339	0.253492
299	ADGRG6	0.426977	0.616464
300	ADGRL1	0.0832467	0.59275
301	ADGRL2	0.386976	0.612114
302	ADGRL3	0.473721	0.1727
303	ADGRL4	0.322268	0.537011
304	ADGRV1	0.0951672	0.292583
305	ADH1B	0.264291	0.417521
306	ADH1C	0.14743	0.800043
307	ADH5	0.559568	0.42509
308	ADH6	0.0562687	0.240867
309	ADHFE1	0.240123	0.545418
310	ADI1	0.499962	0.344638
311	ADIPOR1	-0.047236	0.4671
312	ADIPOR2	0.276107	0.3438
313	ADK	-0.0619516	0.360995
314	ADM	0.0429942	1.03728
315	ADM2	0.360473	0.651813
316	ADM5	-0.0660473	0.380572
317	ADNP	-0.190238	0.530043
318	ADNP2	-0.112912	0.420498
319	ADO	-0.223002	0.304246
320	ADORA1	0.349495	0.154826
321	ADORA2A	0.0389283	0.0696599
322	ADORA2B	0.425768	0.360271
323	ADORA3	0.136805	0.397134
324	ADPGK	0.208034	0.502555
325	ADPRH	0.0592533	0.531179
326	ADPRHL1	-0.192808	0.505606
327	ADPRM	0.160938	0.612004
328	ADPRS	0.117645	0.300142
329	ADRA1A	0.535683	0.385745
330	ADRA1B	0.225375	0.101963
331	ADRA1D	0.38284	0.554866
332	ADRA2A	0.0673584	0.94765
333	ADRA2B	0.153722	0.212433
334	ADRA2C	0.121151	0.94171
335	ADRB1	0.220841	0.708539
336	ADRB2	-0.0496003	0.700176
337	ADRM1	0.249349	0.304131
338	ADSL	0.30665	0.166638
339	ADSS1	0.171587	0.340121
340	ADSS2	0.13982	0.523958
341	ADTRP	0.0301566	0.382633
342	AEBP1	0.266354	0.952659
343	AEBP2	0.356744	0.355095
344	AEN	-0.199611	0.476895
345	AFAP1	0.0755156	0.300395
346	AFAP1L1	0.468416	0.325617
347	AFAP1L2	0.450885	0.603779
348	AFDN	-0.0975767	0.648584
349	AFF1	-0.162591	0.623056
350	AFF2	0.344079	0.146563
351	AFF3	0.196718	1.07824
352	AFF4	0.188633	0.567915
353	AFG1L	-0.0200905	0.198043
354	AFG3L2	-0.0933904	0.445863
355	AFMID	0.449533	0.514234
356	AFTPH	0.0872522	0.457596
357	AGA	0.343778	0.423322
358	AGAP1	-0.0728444	0.467138
359	AGAP2	0.129501	0.247899
360	AGAP3	-0.0182569	0.366784
361	AGAP4	-0.0375772	0.290402
362	AGAP5	-0.0309854	0.0817591
363	AGAP6	0.1655	0.129142
364	AGAP9	-0.198731	0.475191
365	AGBL2	0.209924	0.19669
366	AGBL3	0.203901	0.196169
367	AGBL4	0.206008	0.10663
368	AGBL5	0.136142	0.260501
369	AGER	-0.04832	0.663822
370	AGFG1	0.130039	0.34575
371	AGFG2	0.263896	0.491348
372	AGGF1	0.227904	0.255161
373	AGK	0.068592	0.349236
374	AGL	0.265994	0.440644
375	AGMAT	0.3557	0.542577
376	AGMO	-0.0837355	0.260324
377	AGO1	0.122377	0.261043
378	AGO2	0.245963	0.442214
379	AGO3	0.217329	0.227085
380	AGO4	0.225689	0.377376
381	AGPAT1	0.394623	0.300869
382	AGPAT2	-0.032019	0.579975
383	AGPAT3	0.0715003	0.333934
384	AGPAT4	0.405258	0.222881
385	AGPAT5	-0.0219919	0.513232
386	AGPS	0.214166	0.44462
387	AGR2	-0.121737	1.51711
388	AGRN	0.207187	0.594944
389	AGRP	-0.13305	0.127388
390	AGT	-0.127772	1.57178
391	AGTPBP1	0.0356251	0.41441
392	AGTR1	0.266821	1.31913
393	AGTRAP	0.519589	0.477846
394	AHCTF1	0.325799	0.393102
395	AHCY	0.443215	0.338054
396	AHCYL1	-0.156173	0.470239
397	AHCYL2	0.176114	0.516925
398	AHDC1	0.389167	0.385761
399	AHI1	0.111738	0.307836
400	AHNAK	0.437663	0.658738
401	AHNAK2	0.558472	0.548559
402	AHR	0.425612	0.588036
403	AHRR	-0.0574932	0.0877175
404	AHSA1	0.114941	0.388561
405	AIDA	0.240114	0.745594
406	AIF1	0.149745	0.813174
407	AIF1L	0.376757	0.450028
408	AIFM1	0.591623	0.260119
409	AIFM2	0.19502	0.42639
410	AIFM3	-0.0495481	0.215521
411	AIG1	0.268806	0.25328
412	AIM2	0.27597	0.337689
413	AIMP1	-0.0924177	0.245498
414	AIMP2	0.378015	0.451293
415	AIP	-0.0879871	0.472324
416	AIRE	0.172596	0.0534138
417	AJAP1	0.501189	0.193725
418	AJM1	0.330458	0.46048
419	AJUBA	0.387501	0.571746
420	AK1	-0.090147	0.334109
421	AK2	0.0973949	0.256656
422	AK3	0.13446	0.354024
423	AK4	0.230109	0.608325
424	AK5	0.460955	0.920494
425	AK6	0.179786	0.357949
426	AK7	0.083207	0.283765
427	AK8	0.142508	0.289893
428	AK9	-0.0509192	0.263387
429	AKAP1	0.0229134	0.485487
430	AKAP10	0.234036	0.312333
431	AKAP11	0.155218	0.556001
432	AKAP12	0.613368	0.723429
433	AKAP13	0.184347	0.552983
434	AKAP17A	-0.0127871	0.437593
435	AKAP3	0.22453	0.308706
436	AKAP5	0.0310694	0.330099
437	AKAP6	0.427994	0.202552
438	AKAP7	0.499395	0.538092
439	AKAP8	0.160739	0.24728
440	AKAP8L	0.0170855	0.398252
441	AKAP9	-0.182597	0.639012
442	AKIP1	0.097495	0.272895
443	AKIRIN1	0.223128	0.471373
444	AKIRIN2	0.207664	0.33858
445	AKNA	0.292799	0.468779
446	AKR1A1	0.339949	0.324115
447	AKR1B1	0.254744	0.668091
448	AKR1B10	-0.126441	0.239824
449	AKR1B15	0.0461167	0.084709
450	AKR1C1	0.134755	0.477216
451	AKR1C2	0.22487	0.355207
452	AKR1C3	0.19733	0.693406
453	AKR1E2	-0.0779089	0.380439
454	AKR7A2	0.223824	0.344386
455	AKR7A3	0.443347	0.414113
456	AKT1	0.0596528	0.415272
457	AKT1S1	0.384755	0.293017
458	AKT2	-0.0517146	0.249244
459	AKT3	0.0641185	0.55107
460	AKTIP	0.0269875	0.309946
461	ALAD	0.555894	0.499564
462	ALAS1	0.3759	0.347369
463	ALAS2	-0.162969	0.082707
464	ALB	0.291381	1.0366
465	ALCAM	-0.0569969	0.738297
466	ALDH16A1	-0.256251	0.536937
467	ALDH18A1	0.0399314	0.448312
468	ALDH1A1	0.0523788	1.35279
469	ALDH1A2	0.69013	0.62807
470	ALDH1A3	0.161644	0.901161
471	ALDH1B1	0.392333	0.458131
472	ALDH1L1	-0.0746633	0.767232
473	ALDH1L2	0.527321	0.296372
474	ALDH2	0.456429	0.776839
475	ALDH3A1	0.237458	0.288784
476	ALDH3A2	0.539431	0.449459
477	ALDH3B1	0.306405	0.396071
478	ALDH4A1	0.507611	0.61127
479	ALDH5A1	0.048591	0.40883
480	ALDH6A1	0.13775	0.688161
481	ALDH7A1	0.308782	0.508359
482	ALDH8A1	0.0135875	0.161436
483	ALDH9A1	0.223445	0.521636
484	ALDOA	0.180569	0.452867
485	ALDOB	0.0835898	0.108095
486	ALDOC	0.293255	0.551925
487	ALG1	0.158311	0.301837
488	ALG10	-0.172517	0.276368
489	ALG10B	-0.328572	0.366933
490	ALG11	-0.0452864	0.287161
491	ALG12	0.0873854	0.395757
492	ALG13	0.179358	0.260872
493	ALG14	0.293836	0.232173
494	ALG1L2	0.101428	0.138173
495	ALG2	0.121394	0.414288
496	ALG3	0.389857	0.342388
497	ALG5	0.458971	0.378672
498	ALG6	0.204594	0.33624
499	ALG8	0.151418	0.382283
500	ALG9	0.00368429	0.182958
501	ALK	0.303773	0.0388036
502	ALKAL2	0.166064	0.287993
503	ALKBH1	0.178275	0.227233
504	ALKBH2	0.378525	0.428117
505	ALKBH3	0.339304	0.29518
506	ALKBH4	0.165383	0.317383
507	ALKBH5	0.166379	0.267905
508	ALKBH6	0.0212255	0.186523
509	ALKBH7	0.209321	0.592481
510	ALKBH8	0.145866	0.30618
511	ALMS1	-0.146138	0.408123
512	ALOX12	0.139382	0.120904
513	ALOX15	0.183595	1.0989
514	ALOX15B	0.40282	2.38526
515	ALOX5	-0.0269655	0.697237
516	ALOX5AP	0.183804	0.685367
517	ALPK1	0.489675	0.304798
518	ALPK2	0.072075	0.0967559
519	ALPK3	0.0269349	0.453082
520	ALPL	0.159705	0.849786
521	ALS2	0.0387512	0.319875
522	ALS2CL	0.20186	0.56548
523	ALX4	0.285668	0.359418
524	ALYREF	0.2137	0.360855
525	AMACR	0.325191	1.26389
526	AMBP	0.107409	0.310703
527	AMBRA1	0.130237	0.300358
528	AMD1	0.233747	0.798907
529	AMDHD1	-0.0387559	0.121109
530	AMDHD2	-0.0934859	0.435238
531	AMER1	0.125351	0.280516
532	AMFR	0.363961	0.275317
533	AMH	0.319287	0.657584
534	AMHR2	0.187261	0.115137
535	AMIGO1	-0.072081	0.474192
536	AMIGO2	0.255173	0.692099
537	AMMECR1	-0.0266901	0.503186
538	AMMECR1L	0.0118054	0.344942
539	AMN	-0.105916	0.239469
540	AMN1	-0.17675	0.312883
541	AMOT	0.552565	0.634
542	AMOTL1	-0.125035	0.807185
543	AMOTL2	0.410002	0.648421
544	AMPD2	-0.1976	0.313531
545	AMPD3	-0.0545036	0.800678
546	AMPH	0.435464	0.21093
547	AMT	-0.317619	0.0892942
548	AMY2B	0.158088	0.406058
549	AMZ1	-0.229448	0.0580811
550	AMZ2	0.0330089	0.250112
551	ANAPC1	-0.0365908	0.335872
552	ANAPC10	-0.15685	0.138823
553	ANAPC11	0.431314	0.406665
554	ANAPC13	0.230136	0.369151
555	ANAPC15	0.222447	0.29736
556	ANAPC16	0.299763	0.275051
557	ANAPC2	0.0339573	0.368468
558	ANAPC4	0.183206	0.314058
559	ANAPC5	0.371605	0.283304
560	ANAPC7	0.0367365	0.2603
561	ANG	0.383967	0.888686
562	ANGEL1	0.0516335	0.32074
563	ANGEL2	-0.24469	0.392792
564	ANGPT1	0.638851	0.575408
565	ANGPT2	0.131832	0.581742
566	ANGPT4	0.152659	0.115777
567	ANGPTL1	0.527865	0.528318
568	ANGPTL2	0.325585	0.806763
569	ANGPTL3	0.336954	0.692811
570	ANGPTL4	0.216682	1.15594
571	ANGPTL6	0.034318	0.0931932
572	ANGPTL8	0.00439553	0.122933
573	ANK1	0.321904	0.428078
574	ANK2	0.540404	0.298714
575	ANK3	0.129538	0.642775
576	ANKAR	0.0780384	0.187876
577	ANKDD1A	0.427853	0.32473
578	ANKDD1B	0.43667	0.220064
579	ANKEF1	-0.00591653	0.338068
580	ANKFN1	0.164592	0.0960713
581	ANKFY1	0.269235	0.47718
582	ANKH	0.241895	0.71726
583	ANKHD1	0.126194	0.119941
584	ANKIB1	-0.169672	0.557271
585	ANKK1	0.0721592	0.37558
586	ANKLE1	0.243621	0.149827
587	ANKLE2	0.144669	0.216033
588	ANKMY1	0.0940303	0.264237
589	ANKMY2	0.235183	0.297926
590	ANKRA2	-0.0798023	0.484171
591	ANKRD1	0.128516	0.864921
592	ANKRD10	-0.11381	0.590533
593	ANKRD11	0.0564466	0.38994
594	ANKRD12	0.103681	0.441852
595	ANKRD13A	0.220359	0.403239
596	ANKRD13B	0.472494	0.472917
597	ANKRD13C	0.199967	0.336872
598	ANKRD13D	-0.0695275	0.480472
599	ANKRD16	0.396863	0.3511
600	ANKRD17	-0.0803693	0.615178
601	ANKRD18A	0.20967	0.262303
602	ANKRD18B	0.0248755	0.350771
603	ANKRD2	0.0208002	0.363663
604	ANKRD22	-0.0349123	0.719533
605	ANKRD23	0.134763	0.227517
606	ANKRD24	0.116918	0.460168
607	ANKRD26	-0.0337454	0.233491
608	ANKRD27	0.253365	0.331151
609	ANKRD28	-0.0348883	0.376225
610	ANKRD29	0.140963	0.850674
611	ANKRD31	0.0261231	0.0668575
612	ANKRD33B	0.506579	0.276078
613	ANKRD34A	-0.26982	0.367378
614	ANKRD35	0.359903	0.623977
615	ANKRD36	0.060533	0.170437
616	ANKRD36B	-0.00316181	0.197735
617	ANKRD36C	0.254947	0.162949
618	ANKRD37	0.187244	0.810846
619	ANKRD39	0.0366899	0.222899
620	ANKRD40	0.151421	0.42494
621	ANKRD42	0.206475	0.271038
622	ANKRD44	0.282281	0.322339
623	ANKRD45	0.0569087	0.0797713
624	ANKRD46	0.0569278	0.401328
625	ANKRD49	-0.00037367	0.305787
626	ANKRD50	0.137844	0.661433
627	ANKRD52	0.317789	0.462448
628	ANKRD53	0.108601	0.247158
629	ANKRD54	0.330793	0.295568
630	ANKRD55	0.000876371	0.0854997
631	ANKRD6	-0.0127313	0.383388
632	ANKRD61	-0.0324902	0.235579
633	ANKRD65	0.223867	0.762895
634	ANKRD9	0.175169	0.415778
635	ANKS1A	0.166992	0.34662
636	ANKS1B	-0.215058	0.179071
637	ANKS3	0.356266	0.437194
638	ANKS6	0.162122	0.456358
639	ANKZF1	0.554564	0.453152
640	ANLN	0.312798	0.524553
641	ANO1	0.417183	0.662506
642	ANO10	-0.139251	0.311528
643	ANO2	0.0906849	0.166328
644	ANO3	0.0131032	0.186749
645	ANO4	0.695618	0.464584
646	ANO5	0.452265	0.48123
647	ANO6	0.5075	0.612524
648	ANO7	0.425437	1.18623
649	ANO8	0.179536	0.41377
650	ANO9	0.0246576	0.714345
651	ANOS1	0.0914833	0.713159
652	ANP32A	0.287424	0.262619
653	ANP32B	-0.00715868	0.372333
654	ANP32E	0.585789	0.507615
655	ANPEP	0.4592	2.32764
656	ANTKMT	0.257528	0.588205
657	ANTXR1	0.526266	0.773143
658	ANTXR2	0.426383	0.767124
659	ANXA1	0.475365	0.873658
660	ANXA10	0.18091	0.191006
661	ANXA11	0.287771	0.399893
662	ANXA13	-0.0059037	0.207018
663	ANXA2	0.452992	0.734897
664	ANXA2R	-0.0705486	0.658356
665	ANXA3	0.306653	0.794291
666	ANXA4	0.446019	0.331727
667	ANXA5	-0.145653	0.524696
668	ANXA6	0.458797	0.682469
669	ANXA7	0.173991	0.334849
670	ANXA8	0.124475	0.391142
671	ANXA9	-0.188438	0.585603
672	AOAH	0.157164	0.574108
673	AOC1	0.422559	1.6088
674	AOC2	-0.0827297	0.350125
675	AOC3	0.576337	0.782423
676	AOPEP	0.401584	0.459037
677	AOX1	0.651218	0.786707
678	AP1AR	-0.0768201	0.429222
679	AP1B1	0.303388	0.432771
680	AP1G1	0.176389	0.508119
681	AP1G2	0.280029	0.456288
682	AP1M1	0.0858365	0.211921
683	AP1M2	0.6145	0.357518
684	AP1S1	0.334454	0.409636
685	AP1S2	0.123769	0.36969
686	AP1S3	-0.0378574	0.413131
687	AP2A1	0.228691	0.331306
688	AP2A2	-0.136168	0.254729
689	AP2B1	0.200154	0.325638
690	AP2M1	0.267421	0.280168
691	AP2S1	0.320818	0.596389
692	AP3B1	0.370565	0.388905
693	AP3B2	0.0440122	0.243862
694	AP3D1	0.170376	0.387813
695	AP3M1	-0.0912888	0.5514
696	AP3M2	0.1473	0.412245
697	AP3S1	-0.293721	0.393384
698	AP3S2	0.113689	0.256218
699	AP4B1	-0.096134	0.272151
700	AP4E1	0.183227	0.292424
701	AP4M1	0.258792	0.328766
702	AP4S1	0.466413	0.148882
703	AP5B1	0.298399	0.342471
704	AP5M1	-0.0361326	0.387957
705	AP5S1	0.0852541	0.21286
706	AP5Z1	-0.0937103	0.370092
707	APAF1	0.0715234	0.479446
708	APBA1	-0.138662	0.368277
709	APBA2	0.523555	0.520557
710	APBA3	-0.209952	0.323881
711	APBB1	0.360593	0.52314
712	APBB1IP	0.224363	0.532051
713	APBB2	0.192308	0.369358
714	APBB3	0.049163	0.477723
715	APC	0.25439	0.471978
716	APC2	0.0369076	0.153579
717	APCDD1	0.254136	0.796903
718	APCDD1L	0.242994	0.116863
719	APEH	0.405064	0.329744
720	APEX1	0.168512	0.403766
721	APEX2	0.309901	0.244118
722	APH1A	0.0679586	0.294393
723	APH1B	0.13741	0.455715
724	API5	-0.0695268	0.401048
725	APIP	0.0234883	0.360287
726	APLF	0.474619	0.202599
727	APLN	0.350764	0.714619
728	APLNR	0.0319529	0.644291
729	APLP1	-0.0614897	0.55025
730	APLP2	0.319107	0.572923
731	APMAP	0.214049	0.440611
732	APOA1	-0.0733591	0.308437
733	APOB	0.131762	0.101431
734	APOBEC2	-0.00148873	0.374235
735	APOBEC3A	-0.0606157	0.19994
736	APOBEC3B	0.0609721	0.305959
737	APOBEC3C	0.451782	0.941633
738	APOBEC3D	0.60163	0.084984
739	APOBEC3F	0.191313	0.505813
740	APOBEC3G	0.368837	0.553611
741	APOBEC3H	-0.0170622	0.293372
742	APOBR	-0.0869088	0.53757
743	APOC1	0.0449424	1.13212
744	APOD	-0.132088	1.31869
745	APOE	0.0437173	1.21872
746	APOF	0.0784618	1.06526
747	APOL1	0.373271	0.855583
748	APOL2	0.0120368	0.445207
749	APOL3	0.0885253	0.688062
750	APOL4	-0.0121361	1.33838
751	APOL6	0.465704	0.636779
752	APOLD1	0.176269	0.79258
753	APOM	0.0400619	0.357145
754	APOO	0.187572	0.402919
755	APOOL	-0.129756	0.596011
756	APP	-0.0336538	0.803778
757	APPBP2	-0.019737	0.421042
758	APPL1	-0.142178	0.445057
759	APPL2	-0.00150004	0.562972
760	APRT	0.33296	0.614314
761	APTR	-0.0106633	0.324644
762	APTX	0.387852	0.19314
763	AQP1	0.219662	0.786055
764	AQP11	-0.047047	0.827417
765	AQP3	0.415293	0.910299
766	AQP5	0.32401	0.39816
767	AQP6	0.0022567	0.118337
768	AQP7	0.0976624	0.159061
769	AQP8	0.0306662	0.189935
770	AQP9	0.174819	0.299671
771	AQR	-0.214646	0.462577
772	AR	-0.0789373	0.648437
773	ARAF	0.304139	0.303827
774	ARAP1	0.091959	0.413367
775	ARAP2	-0.0202075	0.383707
776	ARAP3	0.0447842	0.510029
777	ARC	0.0511149	0.513672
778	ARCN1	0.109203	0.4979
779	AREG	0.0769524	1.01046
780	AREL1	0.147344	0.390269
781	ARF1	0.385504	0.326255
782	ARF3	0.358138	0.344373
783	ARF4	0.0508121	0.527925
784	ARF5	0.314209	0.369459
785	ARF6	0.0445537	0.449204
786	ARFGAP1	-0.111071	0.475294
787	ARFGAP2	0.195252	0.246637
788	ARFGAP3	0.177024	0.52993
789	ARFGEF1	0.307434	0.398294
790	ARFGEF2	0.23831	0.584312
791	ARFGEF3	0.0329631	0.929589
792	ARFIP1	0.103137	0.366657
793	ARFIP2	0.370203	0.364428
794	ARFRP1	-0.208772	0.493864
795	ARG1	-0.0901948	0.259492
796	ARG2	0.364973	1.23473
797	ARGLU1	0.0777259	0.659169
798	ARHGAP1	0.318829	0.401351
799	ARHGAP10	0.363599	0.450747
800	ARHGAP11A	0.174986	0.335348
801	ARHGAP11B	-0.161543	0.082392
802	ARHGAP12	-0.186058	0.580878
803	ARHGAP15	0.237702	0.381396
804	ARHGAP17	0.303558	0.252635
805	ARHGAP18	0.0874759	0.563017
806	ARHGAP19	0.115252	0.283634
807	ARHGAP20	0.609237	0.36714
808	ARHGAP21	0.0540475	0.474617
809	ARHGAP22	0.130635	0.305684
810	ARHGAP23	0.529869	0.611202
811	ARHGAP24	0.464717	0.242331
812	ARHGAP25	0.343745	0.428284
813	ARHGAP26	0.027608	0.454807
814	ARHGAP27	0.304017	0.397115
815	ARHGAP28	-0.0242227	0.744253
816	ARHGAP29	-0.152537	0.662319
817	ARHGAP30	0.29011	0.600078
818	ARHGAP31	0.47888	0.443651
819	ARHGAP32	-0.149716	0.657124
820	ARHGAP33	0.163182	0.520293
821	ARHGAP35	0.13331	0.416684
822	ARHGAP39	0.416702	0.412026
823	ARHGAP4	0.0522501	0.661934
824	ARHGAP40	0.17895	0.636034
825	ARHGAP42	0.141665	0.359027
826	ARHGAP44	0.252583	0.31806
827	ARHGAP45	0.0436883	0.603501
828	ARHGAP5	0.13996	0.666401
829	ARHGAP6	0.0728107	0.575693
830	ARHGAP8	-0.272947	0.283214
831	ARHGAP9	0.179509	0.532386
832	ARHGDIA	0.196466	0.39778
833	ARHGDIB	-0.00537261	0.954902
834	ARHGDIG	0.457034	0.753195
835	ARHGEF1	-0.0546927	0.420525
836	ARHGEF10	0.0857296	0.109497
837	ARHGEF10L	0.186476	0.374542
838	ARHGEF11	0.291796	0.439499
839	ARHGEF12	0.0515452	0.583292
840	ARHGEF15	0.237853	0.423958
841	ARHGEF16	0.384315	0.400519
842	ARHGEF17	0.334798	0.546286
843	ARHGEF18	-0.0964179	0.257694
844	ARHGEF19	0.0594922	0.72127
845	ARHGEF2	0.418779	0.432896
846	ARHGEF25	0.537807	0.466561
847	ARHGEF26	0.215457	0.798157
848	ARHGEF28	0.467962	0.36251
849	ARHGEF3	0.158828	0.573509
850	ARHGEF33	0.182635	0.106494
851	ARHGEF35	-0.0953161	0.561529
852	ARHGEF37	0.283265	0.542674
853	ARHGEF38	0.0926056	0.635137
854	ARHGEF39	0.307512	0.209472
855	ARHGEF4	-0.0681726	0.463305
856	ARHGEF40	0.444205	0.443482
857	ARHGEF5	0.0862886	0.296366
858	ARHGEF6	0.320552	0.507474
859	ARHGEF7	0.174399	0.425172
860	ARHGEF9	0.184463	0.283414
861	ARID1A	-0.0612287	0.545955
862	ARID1B	0.00560521	0.356227
863	ARID2	0.130064	0.388951
864	ARID3A	-0.0460268	0.356254
865	ARID3B	0.33158	0.230961
866	ARID3C	-0.325335	0.125614
867	ARID4A	0.0150087	0.418082
868	ARID4B	-0.00152027	0.396733
869	ARID5A	0.113017	0.972923
870	ARID5B	0.0183272	0.642131
871	ARIH1	-0.0140613	0.313743
872	ARIH2	0.252231	0.312307
873	ARL1	0.140971	0.396146
874	ARL10	0.434998	0.234556
875	ARL11	0.251307	0.177411
876	ARL13A	0.0405584	0.0900676
877	ARL13B	0.0368293	0.492363
878	ARL14EP	-0.00978244	0.267905
879	ARL15	-0.100904	0.490888
880	ARL16	-0.0717242	0.530632
881	ARL17A	-0.076727	0.12824
882	ARL17B	0.00772418	0.148975
883	ARL2	-0.0863878	0.62807
884	ARL2BP	0.184118	0.168067
885	ARL3	-0.0417355	0.348683
886	ARL4A	0.356458	0.513069
887	ARL4C	0.608256	0.58582
888	ARL4D	0.491237	0.774547
889	ARL5A	-0.177339	0.451613
890	ARL5B	-0.0557274	0.511881
891	ARL6	-0.0574176	0.39764
892	ARL6IP1	-0.00176565	0.473303
893	ARL6IP4	-0.0740206	0.18699
894	ARL6IP5	0.299711	0.489551
895	ARL6IP6	-0.168411	0.388773
896	ARL8A	0.218214	0.279251
897	ARL8B	0.34235	0.406044
898	ARL9	-0.109048	0.333646
899	ARMC1	-0.0769552	0.44672
900	ARMC10	-0.162752	0.342559
901	ARMC12	0.155258	0.372989
902	ARMC2	-0.0665528	0.20896
903	ARMC5	-0.0608078	0.453168
904	ARMC6	0.397699	0.322342
905	ARMC7	-0.0589489	0.374941
906	ARMC8	0.153922	0.308401
907	ARMC9	-0.0126683	0.231245
908	ARMCX1	0.617594	0.872974
909	ARMCX2	0.280132	0.77661
910	ARMCX3	0.11748	0.42874
911	ARMCX4	0.428638	0.391325
912	ARMCX5	0.103567	0.296971
913	ARMCX6	0.306929	0.330585
914	ARMH1	0.212408	0.394558
915	ARMH3	0.277841	0.283477
916	ARMH4	0.411528	0.241104
917	ARMT1	-0.0256459	0.412915
918	ARNT	0.289351	0.347196
919	ARNT2	-0.100333	0.548955
920	ARPC1A	0.0849123	0.462727
921	ARPC1B	0.0668664	0.13877
922	ARPC2	0.368682	0.305215
923	ARPC3	0.240255	0.361921
924	ARPC4	-0.161289	0.475044
925	ARPC5	0.177279	0.314111
926	ARPC5L	0.255724	0.347719
927	ARPIN	0.151289	0.446758
928	ARPP19	0.156995	0.402968
929	ARR3	0.0508548	0.145348
930	ARRB1	0.475511	0.365772
931	ARRB2	0.0334225	0.432067
932	ARRDC1	-0.230851	0.496986
933	ARRDC2	-0.00155466	0.72016
934	ARRDC3	0.31079	0.752908
935	ARRDC4	-0.205433	0.527411
936	ARRDC5	0.184588	0.167271
937	ARSA	0.211685	0.506812
938	ARSB	0.136544	0.362653
939	ARSD	0.288009	0.459157
940	ARSG	0.109624	0.361393
941	ARSI	0.415011	0.26591
942	ARSJ	0.557084	0.529813
943	ARSK	0.340527	0.393463
944	ARSL	0.0662253	0.247528
945	ART3	-0.016675	0.311787
946	ART4	0.0717101	0.523083
947	ART5	0.0593512	0.37389
948	ARTN	-0.171037	0.390337
949	ARV1	0.223182	0.367597
950	ARVCF	0.485313	0.399684
951	ASAH1	-0.0118594	0.617799
952	ASAH2	0.0602668	0.110591
953	ASAH2B	0.135136	0.223353
954	ASAP1	0.379821	0.473265
955	ASAP2	0.0171745	0.629247
956	ASAP3	0.254297	0.484421
957	ASB1	0.210189	0.321043
958	ASB12	0.123214	0.173108
959	ASB13	-0.121832	0.406817
960	ASB14	-0.191119	0.109482
961	ASB16	0.0609618	0.266309
962	ASB2	0.500112	0.699278
963	ASB3	0.264184	0.357745
964	ASB4	-0.0560549	0.0725788
965	ASB6	-0.106065	0.228029
966	ASB7	-0.101568	0.332865
967	ASB8	0.116586	0.275711
968	ASB9	-0.0960169	0.68629
969	ASCC1	0.0880203	0.344823
970	ASCC2	0.089205	0.259727
971	ASCC3	0.428622	0.451027
972	ASCL2	0.220877	0.813799
973	ASCL5	0.032843	0.123156
974	ASF1A	-0.126426	0.436242
975	ASF1B	0.456449	0.645607
976	ASGR1	0.0708956	0.198188
977	ASGR2	0.144591	0.152073
978	ASH1L	0.233042	0.517261
979	ASH2L	0.306978	0.347581
980	ASIC1	-0.0228305	0.428019
981	ASIC2	0.310066	0.367634
982	ASIC3	0.231621	0.500286
983	ASIC4	0.124198	0.0778293
984	ASIP	-0.0698838	0.162195
985	ASL	0.205317	0.326918
986	ASMT	-0.310393	0.0785764
987	ASMTL	0.349008	0.302558
988	ASNS	0.295235	0.119024
989	ASNSD1	0.0597995	0.216885
990	ASPA	0.477064	0.303306
991	ASPDH	0.0632197	0.141592
992	ASPG	0.0097836	0.130533
993	ASPH	0.209695	0.565085
994	ASPHD1	0.168354	0.603675
995	ASPHD2	-0.0442232	0.378881
996	ASPM	0.323127	0.339372
997	ASPN	0.145964	0.968334
998	ASPRV1	0.101929	0.265916
999	ASPSCR1	0.13889	0.420287
1000	ASRGL1	0.168617	0.784078
1001	ASS1	-0.235349	0.998846
1002	ASTE1	0.035266	0.239978
1003	ASTN1	0.191626	0.178242
1004	ASTN2	0.430246	0.695775
1005	ASXL1	0.210858	0.356663
1006	ASXL2	0.0105835	0.465756
1007	ASXL3	0.552592	0.14771
1008	ATAD1	0.350211	0.649712
1009	ATAD2	0.148929	0.587242
1010	ATAD2B	0.157898	0.323344
1011	ATAD3A	0.289886	0.43579
1012	ATAD3B	0.17897	0.594748
1013	ATAD3C	0.104998	0.531816
1014	ATAD5	0.363079	0.200263
1015	ATAT1	0.516548	0.399288
1016	ATE1	0.278183	0.424198
1017	ATF1	-0.0461639	0.436786
1018	ATF2	-0.0189343	0.482366
1019	ATF3	0.366173	1.70918
1020	ATF4	0.309866	0.354663
1021	ATF5	0.305827	0.560566
1022	ATF6	0.307779	0.429527
1023	ATF6B	0.0771282	0.372288
1024	ATF7	-0.0261806	0.348759
1025	ATF7IP	0.320836	0.454418
1026	ATF7IP2	-0.0785773	0.491448
1027	ATG10	0.105303	0.233954
1028	ATG101	0.0366299	0.388472
1029	ATG12	-0.0823875	0.280677
1030	ATG13	0.200442	0.25105
1031	ATG14	0.10147	0.309534
1032	ATG16L1	0.0689467	0.291999
1033	ATG16L2	-0.139656	0.604666
1034	ATG2A	0.0915941	0.286916
1035	ATG2B	-0.16265	0.453167
1036	ATG3	0.119402	0.247654
1037	ATG4A	-0.0500337	0.423209
1038	ATG4B	-0.243664	0.38651
1039	ATG4C	-0.182225	0.356658
1040	ATG4D	0.224086	0.295673
1041	ATG5	0.511078	0.336069
1042	ATG7	0.0835212	0.21234
1043	ATG9A	0.0333067	0.572866
1044	ATG9B	0.327936	0.322228
1045	ATIC	0.109256	0.372142
1046	ATL1	-0.0711258	0.447298
1047	ATL2	0.39959	0.396023
1048	ATL3	0.0438604	0.503378
1049	ATM	0.188349	0.428267
1050	ATMIN	0.267976	0.389189
1051	ATN1	0.134178	0.420173
1052	ATOH7	0.201451	0.138641
1053	ATOH8	0.0240406	0.711708
1054	ATOX1	-0.0612257	0.465013
1055	ATP10A	-0.0591934	0.323353
1056	ATP10B	-0.014271	0.0380001
1057	ATP10D	0.474718	0.459956
1058	ATP11A	0.0921721	0.997331
1059	ATP11B	-0.249373	0.835746
1060	ATP11C	0.306473	0.406078
1061	ATP13A1	0.244838	0.30303
1062	ATP13A2	0.415288	0.414063
1063	ATP13A3	-0.0947261	0.590176
1064	ATP13A4	0.052077	0.133254
1065	ATP1A1	0.147729	0.914306
1066	ATP1A2	0.601472	0.878982
1067	ATP1A3	0.0852229	0.0283641
1068	ATP1A4	0.249163	0.112349
1069	ATP1B1	0.345479	0.838806
1070	ATP1B2	0.349158	0.444744
1071	ATP1B3	-0.0965586	0.442256
1072	ATP23	-0.0853285	0.253832
1073	ATP2A1	0.0788085	0.476774
1074	ATP2A2	0.409741	0.583988
1075	ATP2A3	0.257479	0.827397
1076	ATP2B1	-0.0266171	0.547011
1077	ATP2B2	-0.00990292	0.0479167
1078	ATP2B4	0.643385	0.739055
1079	ATP2C1	0.282783	0.632173
1080	ATP2C2	0.316843	0.680966
1081	ATP5F1A	0.128369	0.351829
1082	ATP5F1B	0.123631	0.402817
1083	ATP5F1C	0.171749	0.295482
1084	ATP5F1D	0.0465747	0.700309
1085	ATP5F1E	0.166401	0.50441
1086	ATP5IF1	0.489911	0.36793
1087	ATP5MC1	0.241464	0.447575
1088	ATP5MC2	0.253568	0.37142
1089	ATP5MC3	0.0429023	0.353804
1090	ATP5ME	0.330779	0.70732
1091	ATP5MF	0.373204	0.481244
1092	ATP5MG	0.141636	0.392718
1093	ATP5MGL	0.0324626	0.123061
1094	ATP5PB	0.266872	0.28967
1095	ATP5PD	0.23175	0.367788
1096	ATP5PF	0.282012	0.354168
1097	ATP5PO	0.16339	0.561896
1098	ATP6AP1	0.442474	0.346451
1099	ATP6AP2	0.26117	0.360438
1100	ATP6V0A1	0.419784	0.324473
1101	ATP6V0A2	-0.15749	0.289502
1102	ATP6V0B	0.281896	0.48151
1103	ATP6V0C	0.0187516	0.149555
1104	ATP6V0D1	0.232982	0.394881
1105	ATP6V0D2	0.211111	0.259173
1106	ATP6V0E1	0.18473	0.364721
1107	ATP6V0E2	0.371609	0.645241
1108	ATP6V1A	-0.080784	0.593492
1109	ATP6V1B2	0.141543	0.395901
1110	ATP6V1C1	0.0255566	0.462105
1111	ATP6V1C2	0.0407781	0.564877
1112	ATP6V1D	0.311739	0.384914
1113	ATP6V1E1	0.215779	0.317197
1114	ATP6V1E2	0.075598	0.309395
1115	ATP6V1F	0.174554	0.457422
1116	ATP6V1G1	0.204681	0.472632
1117	ATP6V1G2	0.178977	0.2268
1118	ATP6V1H	0.22123	0.376356
1119	ATP7A	-0.0982275	0.544851
1120	ATP7B	0.0534325	0.476498
1121	ATP8A1	-0.127814	0.790974
1122	ATP8A2	0.321209	1.00151
1123	ATP8B1	0.216356	0.674352
1124	ATP8B2	0.306787	0.75174
1125	ATP8B3	0.0719313	0.117496
1126	ATP8B4	0.283516	0.659593
1127	ATP9A	0.02745	0.622926
1128	ATP9B	-0.145021	0.299326
1129	ATPAF1	0.197025	0.320653
1130	ATPAF2	0.245365	0.254674
1131	ATPSCKMT	0.186293	0.264357
1132	ATR	0.0942475	0.344728
1133	ATRAID	0.438506	0.286168
1134	ATRIP	0.187892	0.282081
1135	ATRN	-0.121626	0.453317
1136	ATRNL1	0.560579	0.326305
1137	ATRX	-0.139521	0.47945
1138	ATXN1	-0.038039	0.533499
1139	ATXN10	0.0346494	0.372837
1140	ATXN1L	0.293587	0.459061
1141	ATXN2	-0.0499931	0.50884
1142	ATXN2L	0.286622	0.500343
1143	ATXN3	0.0851787	0.231818
1144	ATXN7	0.180217	0.381146
1145	ATXN7L1	0.120224	0.359174
1146	ATXN7L2	0.14787	0.275851
1147	ATXN7L3	0.166685	0.342763
1148	ATXN7L3B	-0.120273	0.441248
1149	AUH	0.128812	0.554342
1150	AUNIP	0.423488	0.1805
1151	AUP1	-0.0365673	0.359385
1152	AURKA	0.409308	0.459787
1153	AURKAIP1	0.38885	0.507982
1154	AURKB	0.406518	0.543534
1155	AURKC	-0.1903	0.232712
1156	AUTS2	0.521623	0.413009
1157	AVEN	-0.0941219	0.316331
1158	AVIL	0.257829	0.269687
1159	AVL9	0.0880227	0.480493
1160	AVPI1	0.229957	0.837296
1161	AVPR1A	0.280818	0.421214
1162	AVPR2	0.0432973	0.288733
1163	AXDND1	-0.109128	0.113156
1164	AXIN1	0.249237	0.293833
1165	AXIN2	0.527095	0.496574
1166	AXL	0.469851	0.627679
1167	AZGP1	0.530882	1.46901
1168	AZI2	-0.00981706	0.368517
1169	AZIN1	-0.132322	0.647548
1170	AZIN2	0.154738	0.238491
1171	AZU1	-0.31839	0.244603
1172	B2M	0.453175	0.661076
1173	B3GALNT1	0.268702	0.486939
1174	B3GALNT2	0.220062	0.329601
1175	B3GALT1	-0.0284137	0.163087
1176	B3GALT2	0.525266	0.44597
1177	B3GALT4	0.241439	0.507234
1178	B3GALT5	0.118534	0.241165
1179	B3GALT6	0.488387	0.427067
1180	B3GAT1	-0.16816	0.921894
1181	B3GAT2	0.141492	0.047895
1182	B3GAT3	0.361838	0.410764
1183	B3GLCT	-0.0842628	0.319788
1184	B3GNT2	0.198947	0.498824
1185	B3GNT4	0.113656	0.139592
1186	B3GNT5	0.384043	0.579568
1187	B3GNT7	0.328566	0.392081
1188	B3GNT8	0.293929	0.434549
1189	B3GNT9	0.435753	0.584259
1190	B3GNTL1	0.284578	0.235259
1191	B4GALNT1	0.478664	0.24185
1192	B4GALNT3	0.220034	0.538709
1193	B4GALNT4	0.531298	0.844862
1194	B4GALT1	0.324369	0.529982
1195	B4GALT2	0.0123103	0.338974
1196	B4GALT3	0.365387	0.302651
1197	B4GALT4	0.000386653	0.292761
1198	B4GALT5	0.316149	0.447376
1199	B4GALT6	0.0966645	0.376893
1200	B4GALT7	-0.0160314	0.360573
1201	B4GAT1	0.0989358	0.432838
1202	B9D1	0.235979	0.310606
1203	B9D2	0.0450627	0.430952
1204	BAALC	0.23608	0.180847
1205	BAAT	0.144008	0.100753
1206	BABAM1	-0.0201454	0.482961
1207	BABAM2	-0.0525663	0.313532
1208	BACE1	0.390451	0.333277
1209	BACE2	0.190206	0.874179
1210	BACH1	-0.113921	0.608774
1211	BACH2	0.477408	0.236307
1212	BAD	0.277448	0.449692
1213	BAG1	-0.169757	0.431448
1214	BAG2	0.190411	0.47026
1215	BAG3	0.294225	0.519951
1216	BAG4	0.123267	0.444295
1217	BAG5	-0.0434946	0.29595
1218	BAG6	0.0190414	0.257389
1219	BAHCC1	-0.0959023	0.386567
1220	BAHD1	0.243138	0.297455
1221	BAIAP2	0.121651	0.516526
1222	BAIAP2L1	0.338531	0.46368
1223	BAIAP2L2	0.193961	0.968345
1224	BAIAP3	0.425687	0.584066
1225	BAK1	0.0567265	0.330503
1226	BAMBI	0.112326	1.0207
1227	BANF1	0.07381	0.415055
1228	BANK1	0.263583	1.24461
1229	BANP	0.0532151	0.235821
1230	BAP1	0.320664	0.22368
1231	BARD1	0.142057	0.379713
1232	BARX2	0.073813	0.711694
1233	BASP1	0.135827	1.01358
1234	BATF	0.0531205	0.853651
1235	BATF2	0.237471	0.448942
1236	BATF3	-0.0168917	0.388457
1237	BAX	-0.11479	0.504786
1238	BAZ1A	0.00410378	0.469456
1239	BAZ1B	-0.155547	0.443238
1240	BAZ2A	0.147967	0.55893
1241	BAZ2B	0.223383	0.320965
1242	BBC3	0.189786	0.497445
1243	BBIP1	0.057283	0.243757
1244	BBOF1	-0.109047	0.296468
1245	BBOX1	0.0787284	0.398958
1246	BBS1	-0.000594477	0.102308
1247	BBS10	-0.249613	0.612793
1248	BBS12	-0.222875	0.367276
1249	BBS2	0.26721	0.358155
1250	BBS4	0.0220065	0.704459
1251	BBS5	0.0261202	0.269301
1252	BBS7	0.119969	0.290682
1253	BBS9	0.299693	0.246399
1254	BBX	0.288938	0.523244
1255	BCAM	0.301022	0.692616
1256	BCAN	-0.118399	0.174482
1257	BCAP29	0.0143119	0.168098
1258	BCAP31	0.377112	0.319455
1259	BCAR1	0.0133199	0.387925
1260	BCAR3	0.458863	0.425902
1261	BCAS1	0.530617	0.859575
1262	BCAS2	0.199541	0.326417
1263	BCAS3	0.157788	0.273204
1264	BCAS4	0.20299	0.400515
1265	BCAT1	0.210324	0.424798
1266	BCAT2	0.260949	0.509567
1267	BCCIP	0.0778866	0.307548
1268	BCDIN3D	0.462999	0.262258
1269	BCHE	0.0869306	0.704842
1270	BCKDHA	0.104579	0.114322
1271	BCKDHB	-0.074565	0.512708
1272	BCKDK	0.0416606	0.311813
1273	BCL10	-0.0528222	0.329022
1274	BCL11A	0.326608	0.365605
1275	BCL11B	0.323714	0.306611
1276	BCL2	0.520595	0.547722
1277	BCL2A1	0.118745	0.692624
1278	BCL2L1	0.15152	0.312184
1279	BCL2L10	0.340785	0.509701
1280	BCL2L11	-0.0313826	0.418445
1281	BCL2L12	0.184901	0.378536
1282	BCL2L13	0.0782923	0.388826
1283	BCL2L14	-0.137216	0.44981
1284	BCL2L15	0.056709	0.184712
1285	BCL2L2	0.305805	0.376334
1286	BCL3	-0.0920267	0.905664
1287	BCL6	0.310964	0.589186
1288	BCL6B	0.243464	0.499988
1289	BCL7A	0.0424131	0.396635
1290	BCL7B	0.334382	0.259614
1291	BCL7C	-0.109161	0.451924
1292	BCL9	-0.00232836	0.611616
1293	BCL9L	0.240839	0.638114
1294	BCLAF1	-0.159527	0.403825
1295	BCLAF3	-0.104007	0.345796
1296	BCO1	0.215804	0.292556
1297	BCO2	0.378338	0.145646
1298	BCOR	-0.0436597	0.687272
1299	BCORL1	0.143269	0.394345
1300	BCR	-0.291834	0.337369
1301	BCS1L	0.485908	0.32879
1302	BDH1	0.463025	0.397067
1303	BDH2	0.326636	0.537961
1304	BDKRB1	0.176457	0.106123
1305	BDKRB2	0.379869	0.465261
1306	BDNF	0.468979	0.185254
1307	BDP1	-0.0255833	0.535428
1308	BEAN1	0.244357	0.15402
1309	BECN1	-0.0287289	0.469506
1310	BEGAIN	0.373474	0.206676
1311	BEND3	0.306981	0.545926
1312	BEND4	0.095494	0.98411
1313	BEND5	0.176809	0.452846
1314	BEND6	0.473007	0.215851
1315	BEND7	0.184062	0.356547
1316	BEST1	0.307914	0.193393
1317	BEST4	0.0466677	0.143964
1318	BET1	0.012127	0.345976
1319	BET1L	-0.093207	0.238693
1320	BEX1	0.478884	0.981946
1321	BEX2	0.123197	0.722988
1322	BEX3	0.402409	0.402794
1323	BEX4	0.440612	0.449149
1324	BEX5	0.166426	1.04894
1325	BFAR	0.031519	0.263527
1326	BFSP1	-0.243689	0.210378
1327	BFSP2	-0.0638863	0.0747748
1328	BGLAP	-0.233004	0.424425
1329	BGN	0.0346981	0.983499
1330	BHLHA15	0.155219	0.998269
1331	BHLHE22	0.355593	0.157367
1332	BHLHE40	0.457083	1.04461
1333	BHLHE41	0.210934	0.820265
1334	BHMT	0.14952	0.0734114
1335	BHMT2	0.517525	0.512701
1336	BICC1	-0.163827	0.67236
1337	BICD1	0.272462	0.722553
1338	BICD2	0.318639	0.374328
1339	BICDL1	0.388581	0.496207
1340	BICDL2	-0.13022	0.627629
1341	BICRA	0.129228	0.331217
1342	BICRAL	-0.143885	0.530895
1343	BID	-0.0887277	0.321171
1344	BIK	0.58681	0.531432
1345	BIN1	0.190758	0.557172
1346	BIN2	0.250335	0.499457
1347	BIN3	0.378458	0.307569
1348	BIRC2	0.270712	0.354047
1349	BIRC3	0.267427	0.806685
1350	BIRC5	0.494237	0.646625
1351	BIRC6	-0.0302356	0.475519
1352	BIRC7	0.18959	0.195526
1353	BISPR	0.383016	0.341091
1354	BIVM	0.0218255	0.319947
1355	BLACAT1	0.123155	0.0798109
1356	BLCAP	0.0984386	0.324233
1357	BLK	0.308334	0.344581
1358	BLM	0.315505	0.219978
1359	BLMH	-0.216408	0.404344
1360	BLNK	-0.116652	0.41104
1361	BLOC1S1	0.0949325	0.65981
1362	BLOC1S2	0.0366771	0.383498
1363	BLOC1S3	-0.110633	0.29149
1364	BLOC1S4	0.384838	0.289953
1365	BLOC1S5	0.126965	0.233709
1366	BLOC1S6	0.114086	0.456995
1367	BLVRA	0.0755424	0.45701
1368	BLVRB	0.285028	0.552856
1369	BLZF1	0.0198584	0.450251
1370	BMERB1	0.426927	0.573291
1371	BMF	-0.0653693	0.565477
1372	BMI1	-0.0370388	0.420633
1373	BMP1	0.317925	0.412444
1374	BMP2	0.315454	0.514392
1375	BMP2K	0.0396348	0.286563
1376	BMP4	0.332569	0.693553
1377	BMP5	0.0535453	0.853881
1378	BMP6	0.272714	0.85683
1379	BMP7	0.183981	0.847552
1380	BMP8A	-0.0109337	0.407353
1381	BMP8B	0.157816	0.498571
1382	BMPER	0.360903	0.484202
1383	BMPR1A	0.299169	0.429014
1384	BMPR1B	0.186284	0.802669
1385	BMPR2	0.220745	0.540132
1386	BMS1	-0.011697	0.29587
1387	BMS1P4	-0.0209732	0.152159
1388	BMX	0.0585501	0.495439
1389	BNC1	0.389547	0.128975
1390	BNC2	0.569907	0.299526
1391	BNIP1	0.163396	0.318471
1392	BNIP2	0.368863	0.355514
1393	BNIP3	0.117766	0.47197
1394	BNIP3L	0.454411	0.486725
1395	BNIPL	0.425085	0.670981
1396	BOC	0.500292	0.592061
1397	BOD1	0.0814737	0.31548
1398	BOD1L1	0.0304845	0.539039
1399	BOK	-0.123973	0.607856
1400	BOLA1	0.269209	0.387658
1401	BOLA2B	-0.160424	0.235965
1402	BOLA3	0.310681	0.33717
1403	BOP1	0.361975	0.573523
1404	BORA	0.00682249	0.214883
1405	BORCS5	0.0521978	0.236569
1406	BORCS6	-0.0446237	0.487744
1407	BORCS7	0.162501	0.41995
1408	BORCS8	-0.300532	0.399503
1409	BPGM	-0.0865434	0.461613
1410	BPHL	0.283098	0.3665
1411	BPI	0.25407	0.120124
1412	BPNT1	0.121927	0.359237
1413	BPNT2	-0.0396105	0.518153
1414	BPTF	-0.0487841	0.476196
1415	BRAF	-0.0179902	0.358483
1416	BRAP	0.18562	0.219724
1417	BRAT1	0.101857	0.402082
1418	BRCA1	0.174931	0.305168
1419	BRCA2	0.246227	0.160081
1420	BRCC3	0.148358	0.491513
1421	BRD1	-0.0860434	0.345897
1422	BRD2	-0.0209548	0.418893
1423	BRD3	-0.138809	0.609568
1424	BRD3OS	-0.112308	0.341898
1425	BRD4	0.120351	0.303954
1426	BRD7	0.0672164	0.245127
1427	BRD8	0.141606	0.320909
1428	BRD9	0.157242	0.250256
1429	BRF1	0.147105	0.2385
1430	BRF2	0.0442025	0.396161
1431	BRI3	0.130764	0.455816
1432	BRI3BP	0.0162681	0.453024
1433	BRICD5	0.217455	0.437421
1434	BRINP1	0.0560465	0.62943
1435	BRINP2	0.00912913	0.0496201
1436	BRIP1	0.196757	0.219595
1437	BRIX1	0.342543	0.28775
1438	BRK1	0.273053	0.275312
1439	BRMS1	-0.244328	0.507525
1440	BRMS1L	-0.056563	0.306272
1441	BROX	0.0647879	0.422238
1442	BRPF1	0.182796	0.309432
1443	BRPF3	0.0824092	0.572728
1444	BRSK1	-0.0839923	0.617516
1445	BRSK2	0.387753	0.777476
1446	BRWD1	-0.00835725	0.395293
1447	BRWD3	0.314151	0.309565
1448	BSCL2	0.0578708	0.167701
1449	BSDC1	0.0802328	0.309546
1450	BSG	0.22028	0.41416
1451	BSN	0.181649	0.137545
1452	BSPRY	0.237141	0.400561
1453	BST1	0.355464	0.255933
1454	BST2	0.201106	1.20524
1455	BTAF1	0.151743	0.557541
1456	BTBD1	0.0427153	0.365113
1457	BTBD10	-0.0994919	0.317962
1458	BTBD16	0.180611	0.211765
1459	BTBD18	-0.0467336	0.0408285
1460	BTBD19	0.371925	0.31231
1461	BTBD2	0.0410046	0.328239
1462	BTBD3	0.459266	0.36392
1463	BTBD6	0.249484	0.325468
1464	BTBD7	0.141854	0.346471
1465	BTBD8	0.176051	0.320821
1466	BTBD9	0.0825464	0.302045
1467	BTC	-0.13128	0.389743
1468	BTD	0.28669	0.448821
1469	BTF3	0.0731916	0.446692
1470	BTF3L4	0.0545395	0.339055
1471	BTG1	0.179425	0.443402
1472	BTG2	0.136962	1.17904
1473	BTG3	0.3483	0.594415
1474	BTK	0.277005	0.387279
1475	BTLA	0.109718	0.268764
1476	BTN2A1	0.280735	0.383177
1477	BTN2A2	0.389924	0.379535
1478	BTN3A1	0.372076	0.526799
1479	BTN3A2	0.305105	0.655554
1480	BTN3A3	0.308195	0.5147
1481	BTNL8	0.195056	0.0257242
1482	BTNL9	0.0752544	0.432143
1483	BTRC	0.0360666	0.41315
1484	BUB1	0.38115	0.45531
1485	BUB1B	0.253995	0.445452
1486	BUB3	0.0508684	0.314878
1487	BUD13	0.0618866	0.2744
1488	BUD23	0.155172	0.327586
1489	BUD31	0.174413	0.283343
1490	BYSL	0.348076	0.325689
1491	BZW1	0.100113	0.438667
1492	BZW2	0.421045	0.470147
1493	C10orf143	0.109307	0.209827
1494	C10orf55	0.334566	0.05089
1495	C10orf67	0.0615488	0.0245176
1496	C10orf88	-0.167356	0.286863
1497	C11orf16	0.132169	0.161226
1498	C11orf21	0.243762	0.192333
1499	C11orf24	-0.165589	0.335802
1500	C11orf42		0.335802
1501	C11orf54	0.452923	0.346147
1502	C11orf58	-0.067341	0.285725
1503	C11orf65	0.189954	0.0857541
1504	C11orf68	-0.127021	0.352016
1505	C11orf71	0.195057	0.536577
1506	C11orf91	0.266304	0.0901682
1507	C11orf96	0.173379	1.30069
1508	C12orf42	0.189034	0.0420064
1509	C12orf43	0.0498972	0.169096
1510	C12orf56	-0.171582	0.539772
1511	C12orf57	0.276034	0.719233
1512	C12orf60	0.348352	0.464096
1513	C12orf71		0.464096
1514	C12orf75	0.49618	0.683738
1515	C12orf76	-0.0502307	0.265864
1516	C13orf46	0.131864	0.566955
1517	C14orf119	0.164307	0.228555
1518	C14orf132	0.447183	0.520345
1519	C14orf28	0.195041	0.225085
1520	C14orf93	0.106192	0.247793
1521	C15orf39	0.249935	0.448985
1522	C15orf40	0.108851	0.199205
1523	C15orf48	0.0727671	1.62419
1524	C15orf61	0.476237	0.238956
1525	C15orf62	0.298927	0.231535
1526	C16orf54	0.373625	0.579957
1527	C16orf74	0.190616	0.45979
1528	C16orf86	0.165312	0.45169
1529	C16orf87	-0.0546751	0.300698
1530	C16orf89	0.243246	0.74277
1531	C16orf95	0.360758	0.119006
1532	C16orf96	-0.125821	0.135703
1533	C17orf100	0.0536681	0.311213
1534	C17orf107	0.229701	0.299968
1535	C17orf113	0.0104086	0.330741
1536	C17orf58	0.146059	0.581035
1537	C17orf67	0.0264095	0.284288
1538	C17orf75	-0.0464274	0.248531
1539	C17orf78	0.0634262	0.0969558
1540	C17orf99	-0.0717264	0.0769442
1541	C18orf21	0.0525658	0.330733
1542	C18orf32	-0.0674016	0.198527
1543	C18orf54	0.26873	0.184608
1544	C19orf12	0.438971	0.18604
1545	C19orf18	0.0347716	0.64541
1546	C19orf25	-0.213977	0.393132
1547	C19orf38	0.157301	0.343807
1548	C19orf44	-0.106177	0.239354
1549	C19orf47	-0.0895626	0.243864
1550	C19orf53	0.00759665	0.47064
1551	C19orf67	-0.088078	0.0954882
1552	C19orf73	0.217368	0.508564
1553	C19orf81	0.12871	0.957351
1554	C19orf84	-0.100045	0.0424082
1555	C1D	0.286389	0.310655
1556	C1GALT1	0.112627	0.337092
1557	C1GALT1C1	0.176113	0.394325
1558	C1GALT1C1L	0.175226	0.362455
1559	C1QA	0.106389	0.934454
1560	C1QB	0.103397	0.885969
1561	C1QBP	0.0819298	0.439752
1562	C1QC	0.202526	0.827534
1563	C1QL1	0.235994	0.385685
1564	C1QL3	-0.358956	0.455816
1565	C1QL4	0.015836	0.0793237
1566	C1QTNF1	0.395591	0.718993
1567	C1QTNF12	0.0575325	0.277931
1568	C1QTNF2	0.147312	0.410866
1569	C1QTNF3	0.407874	0.937596
1570	C1QTNF4	0.071589	0.35632
1571	C1QTNF6	0.0675943	0.465739
1572	C1QTNF7	0.419782	0.534205
1573	C1R	0.249699	0.95603
1574	C1RL	0.203332	0.669313
1575	C1S	0.378811	0.910753
1576	C1orf115	0.348895	0.749282
1577	C1orf116	0.140679	0.638371
1578	C1orf122	0.244411	0.55482
1579	C1orf127	0.0222332	0.106946
1580	C1orf131	0.22283	0.273635
1581	C1orf146	0.0680176	0.0795996
1582	C1orf159	0.207825	0.380752
1583	C1orf162	0.0708474	0.445699
1584	C1orf174	-0.0313668	0.256597
1585	C1orf198	0.210206	0.375998
1586	C1orf21	0.284857	0.493356
1587	C1orf210	0.329057	0.381815
1588	C1orf216	0.0391979	0.33366
1589	C1orf220	0.0923227	0.163346
1590	C1orf226	0.020261	0.508607
1591	C1orf35	0.338165	0.370379
1592	C1orf43	0.118167	0.400557
1593	C1orf50	0.11284	0.211148
1594	C1orf52	0.123479	0.25892
1595	C1orf53	0.170736	0.538511
1596	C1orf54	0.300138	0.675481
1597	C1orf56	0.378942	0.339803
1598	C1orf74	0.276018	0.354354
1599	C2	0.0274896	0.7107
1600	C20orf144	0.103525	0.242907
1601	C20orf202	0.0704226	0.0717958
1602	C20orf204	0.421988	0.178027
1603	C20orf96	0.12562	0.566394
1604	C21orf58	0.456953	0.337999
1605	C21orf91	0.434865	0.300792
1606	C22orf15	0.058193	0.149791
1607	C22orf23	-0.137497	0.36678
1608	C22orf31	0.263002	0.156619
1609	C22orf39	0.256274	0.256467
1610	C2CD2	0.268224	0.342133
1611	C2CD2L	-0.00598707	0.35876
1612	C2CD3	-0.0365281	0.361268
1613	C2CD4A	0.0932141	0.708386
1614	C2CD4B	-0.00878664	0.813286
1615	C2CD4C	0.182866	0.514074
1616	C2CD4D	0.290848	0.416083
1617	C2CD5	0.0879477	0.389669
1618	C2CD6	0.0337453	0.103197
1619	C2orf15	0.303426	0.327844
1620	C2orf42	-0.141993	0.220907
1621	C2orf49	0.049784	0.302128
1622	C2orf66	0.172779	0.131689
1623	C2orf68	0.228091	0.229338
1624	C2orf69	-0.080166	0.457897
1625	C2orf72	0.199242	1.20088
1626	C2orf74	0.163032	0.171117
1627	C2orf76	0.295627	0.349824
1628	C2orf81	0.131106	0.17804
1629	C2orf88	0.468432	0.422379
1630	C2orf92	0.362023	0.253639
1631	C3	0.20739	1.28011
1632	C3AR1	0.206891	0.531702
1633	C3orf18	0.283289	0.410125
1634	C3orf20	0.0414936	0.0655214
1635	C3orf33	-0.188488	0.25937
1636	C3orf38	-0.0444011	0.3608
1637	C3orf49	-0.0748529	0.0457094
1638	C3orf52	0.253379	0.384914
1639	C3orf62	0.0982852	0.341625
1640	C3orf70	0.666061	0.468241
1641	C3orf80	-0.0408754	0.366742
1642	C4A	0.0927225	0.988648
1643	C4B	0.0845147	1.05013
1644	C4BPA	0.0550491	0.203472
1645	C4BPB	-0.144028	0.0606721
1646	C4orf19	0.209472	0.492185
1647	C4orf3	0.280718	0.318089
1648	C4orf33	0.36101	0.266048
1649	C4orf46	0.146787	0.324914
1650	C4orf50	0.37072	0.0975877
1651	C5	-0.00565476	0.558651
1652	C5AR1	0.209108	0.658091
1653	C5AR2	0.127208	0.10326
1654	C5orf15	0.0613721	0.433717
1655	C5orf22	-0.141695	0.46083
1656	C5orf24	-0.24192	0.652643
1657	C5orf34	0.420022	0.208349
1658	C5orf58	-0.123802	0.0726118
1659	C5orf63	0.0720221	0.254049
1660	C6	0.189893	0.371156
1661	C6orf120	-0.203962	0.566151
1662	C6orf132	0.28129	0.398003
1663	C6orf136	0.332987	0.2952
1664	C6orf141	-0.0645658	0.331307
1665	C6orf163	-0.0911213	0.241588
1666	C6orf226	0.251214	0.578437
1667	C6orf47	0.230298	0.228661
1668	C6orf52	0.216683	0.501632
1669	C6orf58	-0.0447929	0.0962174
1670	C6orf62	0.284218	0.364668
1671	C6orf89	0.346774	0.275476
1672	C7	0.5383	1.009
1673	C7orf25	-0.0740397	0.0898893
1674	C7orf50	-0.116838	0.496384
1675	C7orf57	0.0875935	0.245745
1676	C8G	0.0768633	0.328926
1677	C8orf33	0.183454	0.386983
1678	C8orf48	0.0601518	0.108488
1679	C8orf58	0.00466411	0.375713
1680	C8orf76	-0.0239026	0.331996
1681	C8orf82	-0.0255403	0.616675
1682	C8orf88	0.686508	0.436032
1683	C9orf152	0.0845581	0.636497
1684	C9orf153	0.092293	0.0838459
1685	C9orf163	0.531712	0.246568
1686	C9orf40	0.0995425	0.332001
1687	C9orf43	0.406996	0.199035
1688	C9orf50	0.0781784	0.0890207
1689	C9orf72	0.0143234	0.463779
1690	C9orf78	0.277315	0.316109
1691	C9orf85	0.148247	0.320383
1692	CA11	0.434912	0.706619
1693	CA12	0.283051	0.616852
1694	CA13	0.215158	0.562097
1695	CA14	0.405896	0.473158
1696	CA2	0.116945	0.679668
1697	CA3	-0.0888276	1.22196
1698	CA4	0.0056272	0.432479
1699	CA5B	-0.0844655	0.444439
1700	CA8	-0.0893578	0.533171
1701	CA9	-0.188784	0.212754
1702	CAAP1	-0.0189553	0.409247
1703	CAB39	-0.105869	0.546613
1704	CAB39L	-0.0955976	0.633754
1705	CABCOCO1	0.167932	0.763002
1706	CABIN1	-0.0977468	0.310254
1707	CABLES1	0.360968	0.322316
1708	CABLES2	0.272852	0.305544
1709	CABP1	0.222063	0.176643
1710	CABP4	0.578822	0.384071
1711	CABP7	-0.271499	0.0839888
1712	CABYR	0.324785	0.176904
1713	CACFD1	0.416987	0.419493
1714	CACHD1	0.568707	0.489291
1715	CACNA1A	-0.0448033	0.0816687
1716	CACNA1C	0.387648	0.402692
1717	CACNA1D	0.344196	1.12438
1718	CACNA1E	0.000898085	0.0185868
1719	CACNA1F	-0.182752	0.0499157
1720	CACNA1G	0.346946	0.485945
1721	CACNA1H	0.279394	0.860665
1722	CACNA1I	0.1314	0.198236
1723	CACNA1S	-0.191206	0.178471
1724	CACNA2D1	0.53976	0.747809
1725	CACNA2D2	0.225697	0.420191
1726	CACNA2D3	0.334807	0.328254
1727	CACNA2D4	0.189079	0.133719
1728	CACNB1	0.255141	0.368709
1729	CACNB2	0.307847	0.271103
1730	CACNB3	0.205726	0.442185
1731	CACNB4	0.453102	0.187618
1732	CACNG4	0.623938	1.0887
1733	CACNG8	-0.221176	0.0462478
1734	CACTIN	-0.0403766	0.260296
1735	CACUL1	-0.169651	0.324583
1736	CACYBP	-0.128637	0.444357
1737	CAD	0.209525	0.395004
1738	CADM1	-0.198001	0.733809
1739	CADM2	-0.0377701	0.63625
1740	CADM3	0.273951	0.381674
1741	CADM4	0.415469	0.408083
1742	CADPS	0.271968	0.84139
1743	CADPS2	0.0420633	0.523674
1744	CAGE1	0.249077	0.0430068
1745	CAHM	0.266083	0.402568
1746	CALB1	0.147064	0.0494598
1747	CALB2	0.0978864	0.191401
1748	CALCB	0.176831	0.112402
1749	CALCOCO1	0.299124	0.377742
1750	CALCOCO2	0.156579	0.313108
1751	CALCR	0.0798981	0.0316398
1752	CALCRL	0.313897	0.67291
1753	CALD1	0.560224	0.708187
1754	CALHM2	0.463229	0.473467
1755	CALHM5	0.418337	0.239082
1756	CALHM6	0.0812736	0.324719
1757	CALM1	0.542587	0.451819
1758	CALM2	-0.0544261	0.308724
1759	CALM3	0.00563163	0.300069
1760	CALML4	-0.0162838	0.0349609
1761	CALML6	-0.243295	0.307333
1762	CALN1	0.043115	0.282978
1763	CALR	0.292795	0.460049
1764	CALU	-0.092518	0.570717
1765	CALY	0.0251465	0.156671
1766	CAMK1	0.505266	0.393784
1767	CAMK1D	0.343517	0.547431
1768	CAMK1G	0.30782	0.358445
1769	CAMK2A	0.388604	0.228341
1770	CAMK2B	0.521105	0.661573
1771	CAMK2D	0.0852697	0.546596
1772	CAMK2G	0.515148	0.360406
1773	CAMK2N1	0.0810022	1.07462
1774	CAMK2N2	0.284871	0.582318
1775	CAMK4	0.301898	0.436791
1776	CAMKK1	-0.0973378	0.441842
1777	CAMKK2	0.178125	0.929859
1778	CAMKMT	-0.00601288	0.234845
1779	CAMLG	-0.121382	0.286491
1780	CAMP	0.120745	0.318976
1781	CAMSAP1	-0.152306	0.468526
1782	CAMSAP2	0.229251	0.438535
1783	CAMSAP3	0.534254	0.389804
1784	CAMTA1	-0.0301123	0.241734
1785	CAMTA2	0.234761	0.377708
1786	CAND1	-0.0615914	0.437349
1787	CAND2	0.629465	0.351905
1788	CANT1	0.281373	0.51659
1789	CANX	-0.0950713	0.603019
1790	CAP1	0.368491	0.366762
1791	CAP2	0.472599	0.661626
1792	CAPG	0.297895	0.928603
1793	CAPN1	0.229325	0.343004
1794	CAPN10	0.0129021	0.345907
1795	CAPN11	0.016096	0.118136
1796	CAPN12	0.180589	0.208757
1797	CAPN13	0.131924	0.546445
1798	CAPN14	-0.212974	0.121975
1799	CAPN15	0.374384	0.365075
1800	CAPN2	0.184904	0.590505
1801	CAPN3	0.135775	0.173361
1802	CAPN5	0.0913933	0.870439
1803	CAPN6	0.468458	0.761927
1804	CAPN7	0.00894635	0.410616
1805	CAPN8	0.219656	0.444972
1806	CAPN9	-0.0144606	0.554885
1807	CAPNS1	0.208415	0.337862
1808	CAPRIN1	-0.124783	0.535549
1809	CAPRIN2	0.145239	0.33295
1810	CAPS	0.0223589	0.85212
1811	CAPS2	-0.0445844	0.270136
1812	CAPZA1	-0.115199	0.512251
1813	CAPZA2	0.133488	0.394561
1814	CAPZB	0.365679	0.265283
1815	CARD10	-0.0807794	0.446021
1816	CARD11	0.250423	0.48394
1817	CARD14	-0.100026	0.285353
1818	CARD16	0.214582	0.548877
1819	CARD19	-0.103346	0.362163
1820	CARD6	0.297665	0.358036
1821	CARD8	0.140435	0.259388
1822	CARD9	0.0926325	0.333782
1823	CARF	0.300794	0.238195
1824	CARHSP1	-0.0965839	0.379017
1825	CARM1	0.0414008	0.439508
1826	CARMIL1	0.0764727	0.494851
1827	CARMIL2	0.0860769	0.353768
1828	CARMIL3	0.0445329	0.141079
1829	CARNMT1	-0.0799012	0.393407
1830	CARNS1	0.170467	0.213839
1831	CARS1	-0.0785575	0.283942
1832	CARS2	-0.0793159	0.387292
1833	CASC11	0.134237	0.218413
1834	CASC18	0.284379	0.0642681
1835	CASC2	-0.0828526	0.147215
1836	CASC3	0.0535134	0.345973
1837	CASC8	0.392073	0.323883
1838	CASC9	0.0221237	0.233162
1839	CASD1	-0.251533	0.595329
1840	CASK	-0.118859	0.294569
1841	CASKIN1	0.47926	0.358658
1842	CASKIN2	0.322258	0.339464
1843	CASP1	0.291874	0.597002
1844	CASP10	0.332487	0.425718
1845	CASP2	-0.0135709	0.543375
1846	CASP3	0.127295	0.34368
1847	CASP4	0.289957	0.444484
1848	CASP5	0.0550193	0.0606889
1849	CASP6	0.0753209	0.352674
1850	CASP7	0.203334	0.598657
1851	CASP8	0.0667542	0.459745
1852	CASP8AP2	0.235019	0.466425
1853	CASP9	-0.022086	0.283516
1854	CASQ1	0.573206	0.725282
1855	CASQ2	0.511091	0.715504
1856	CASR	0.0645671	0.0249432
1857	CASS4	0.187993	0.216986
1858	CAST	0.254756	0.464176
1859	CASTOR1	0.180879	0.123014
1860	CASTOR2	0.306891	0.364679
1861	CASZ1	-0.0155759	0.466291
1862	CAT	0.269044	0.550047
1863	CATIP	0.183312	0.284564
1864	CATSPER1	-0.218513	0.0834617
1865	CATSPER2	0.0720456	0.28296
1866	CATSPER3	0.0890388	0.185361
1867	CATSPERB	-0.0294553	0.342295
1868	CATSPERE	0.187439	0.125567
1869	CATSPERG	0.00630437	0.185315
1870	CAV1	0.650543	0.757788
1871	CAV2	0.676172	0.513165
1872	CAVIN1	0.571059	0.719435
1873	CAVIN2	0.466366	0.842361
1874	CAVIN3	0.260964	0.711701
1875	CAVIN4	-0.286434	0.409502
1876	CBARP	0.0909272	0.242564
1877	CBFA2T2	0.0184985	0.531846
1878	CBFA2T3	-0.108748	0.500136
1879	CBFB	-0.153849	0.485812
1880	CBL	0.441331	0.402908
1881	CBLB	0.0891904	0.351159
1882	CBLC	0.116229	0.906928
1883	CBLL1	0.0597262	0.605495
1884	CBLN1	0.15059	0.254674
1885	CBLN3	0.179891	0.411132
1886	CBLN4	-0.14113	0.10018
1887	CBR1	0.442595	0.496809
1888	CBR3	-0.133734	0.880926
1889	CBR4	0.111161	0.523146
1890	CBS	0.0286515	0.501539
1891	CBX1	-0.0861262	0.392864
1892	CBX2	0.39953	0.545054
1893	CBX3	0.164031	0.434154
1894	CBX4	0.00328887	0.536992
1895	CBX5	0.134681	0.439381
1896	CBX6	-0.0788113	0.535477
1897	CBX7	0.461886	0.451848
1898	CBX8	0.452422	0.388212
1899	CBY1	0.370911	0.344515
1900	CBY3	0.0253109	0.134002
1901	CC2D1A	-0.28809	0.352678
1902	CC2D1B	0.0811784	0.22762
1903	CC2D2A	0.0239654	0.361904
1904	CC2D2B	0.0524376	0.0866814
1905	CCAR1	0.191285	0.394793
1906	CCAR2	0.152616	0.361228
1907	CCBE1	0.415883	0.335238
1908	CCDC102A	0.0869342	0.510822
1909	CCDC102B	-0.123638	0.247302
1910	CCDC106	0.249477	0.414318
1911	CCDC107	0.046698	0.489407
1912	CCDC110	-0.0923898	0.49569
1913	CCDC112	-0.0800886	0.447695
1914	CCDC115	0.26928	0.280868
1915	CCDC116	0.0756146	0.10411
1916	CCDC117	-0.182278	0.47209
1917	CCDC12	-0.145007	0.42632
1918	CCDC120	0.286993	0.341992
1919	CCDC121	-0.215066	0.414818
1920	CCDC122	0.224195	0.294692
1921	CCDC124	0.0211039	0.512056
1922	CCDC125	0.276595	0.44599
1923	CCDC126	-0.14808	0.396303
1924	CCDC127	0.131017	0.196936
1925	CCDC13	0.0358715	0.0597134
1926	CCDC134	-0.0244353	0.373508
1927	CCDC136	0.324571	0.490481
1928	CCDC137	-0.0879789	0.402889
1929	CCDC138	0.279404	0.315575
1930	CCDC14	0.235201	0.490524
1931	CCDC141	-0.0570489	0.42868
1932	CCDC142	0.260793	0.292331
1933	CCDC144A	-0.029597	0.25494
1934	CCDC146	0.171333	0.407125
1935	CCDC148	0.0716954	0.138393
1936	CCDC149	0.274611	0.314571
1937	CCDC15	-0.117702	0.363273
1938	CCDC150	0.434577	0.0792397
1939	CCDC152	0.191966	0.188796
1940	CCDC154	-0.0446635	0.723843
1941	CCDC157	0.303034	0.201895
1942	CCDC158	0.222019	0.14578
1943	CCDC159	0.33523	0.487058
1944	CCDC163	0.231559	0.468812
1945	CCDC167	0.24818	0.533609
1946	CCDC168	-0.0860054	0.0293225
1947	CCDC17	0.156554	0.439242
1948	CCDC170	-0.0222466	0.360936
1949	CCDC171	-0.0817756	0.133163
1950	CCDC174	0.269532	0.195339
1951	CCDC18	0.278692	0.154881
1952	CCDC180	0.201942	0.129251
1953	CCDC181	0.393869	0.161203
1954	CCDC183	-0.076565	0.349504
1955	CCDC184	-0.0630894	0.35664
1956	CCDC186	-0.148183	0.752839
1957	CCDC187	0.113396	0.278834
1958	CCDC188	-0.0528757	0.284188
1959	CCDC191	-0.0163601	0.306136
1960	CCDC192	0.0377623	0.100612
1961	CCDC194	0.304599	0.239447
1962	CCDC196	-0.0540206	0.0295025
1963	CCDC200	0.0376213	0.167926
1964	CCDC22	0.324938	0.316834
1965	CCDC24	0.1587	0.494646
1966	CCDC25	0.254246	0.384781
1967	CCDC26	-0.494699	0.0793277
1968	CCDC28A	0.509717	0.410823
1969	CCDC28B	-0.0404671	0.408652
1970	CCDC3	0.277486	0.755546
1971	CCDC30	-0.00990776	0.127606
1972	CCDC32	-0.165953	0.238605
1973	CCDC34	0.282816	0.363127
1974	CCDC38	0.142444	0.0265702
1975	CCDC39	-0.11342	0.0297714
1976	CCDC40	0.515267	0.3635
1977	CCDC43	0.149646	0.290186
1978	CCDC47	0.0469671	0.466859
1979	CCDC50	-0.0836844	0.509435
1980	CCDC51	0.310699	0.346697
1981	CCDC57	-0.0110687	0.47499
1982	CCDC59	0.0768697	0.246902
1983	CCDC6	0.0672834	0.533519
1984	CCDC61	0.071452	0.483785
1985	CCDC62	0.0371731	0.0721875
1986	CCDC65	-0.00830863	0.30863
1987	CCDC66	0.128217	0.281453
1988	CCDC68	0.449214	0.441567
1989	CCDC69	0.552967	0.624085
1990	CCDC7	0.00347041	0.159859
1991	CCDC71	-0.10208	0.298202
1992	CCDC71L	0.147035	0.432268
1993	CCDC73	0.0653014	0.0584189
1994	CCDC74A	0.169526	0.826625
1995	CCDC74B	0.134781	0.667243
1996	CCDC77	0.190499	0.268939
1997	CCDC78	0.401705	0.695568
1998	CCDC8	0.452436	0.669221
[truncated: 14,060 more rows]

## Sheet: six heads
	gene	pcc	rmse
0	A1BG	0.13413	0.0465939
1	A2M	0.301314	0.946154
2	A2ML1	0.370653	0.346222
3	A4GALT	0.461074	0.56604
4	AAAS	-0.103855	0.300289
5	AACS	0.359469	0.32241
6	AADAT	0.15986	0.758151
7	AAGAB	0.369135	0.304144
8	AAK1	0.168476	0.455895
9	AAMDC	0.11848	0.377579
10	AAMP	0.420701	0.253063
11	AANAT	0.168679	0.0431202
12	AAR2	0.105046	0.257121
13	AARD	0.136895	0.278427
14	AARS1	0.367423	0.382808
15	AARS2	-0.187096	0.249156
16	AARSD1	-0.155215	0.2569
17	AASDH	0.0172087	0.325241
18	AASDHPPT	-0.0713933	0.355479
19	AASS	-0.0262703	0.461872
20	AATBC	0.385482	0.380545
21	AATF	-0.139541	0.350947
22	AATK	-0.014702	0.477177
23	ABAT	0.340411	0.760259
24	ABCA1	-0.021709	0.660047
25	ABCA10	0.338593	0.18061
26	ABCA12	-0.00465525	0.199788
27	ABCA13	-0.0305531	0.0495014
28	ABCA2	0.340481	0.491756
29	ABCA3	0.250525	0.480397
30	ABCA4	0.438292	0.0912494
31	ABCA5	-0.0671979	0.402161
32	ABCA6	0.390431	0.196247
33	ABCA7	0.0782242	0.491271
34	ABCA8	0.410657	0.509951
35	ABCA9	0.197279	0.197179
36	ABCB1	0.349516	0.55327
37	ABCB10	-0.0337431	0.455967
38	ABCB11	0.10761	0.0768096
39	ABCB4	0.272797	0.112142
40	ABCB5	0.0450423	0.240812
41	ABCB6	0.213417	0.132715
42	ABCB7	-0.128726	0.287183
43	ABCB8	0.316579	0.337167
44	ABCB9	-0.0457654	0.159471
45	ABCC1	-0.121215	0.513542
46	ABCC10	0.0254004	0.387208
47	ABCC11	0.1954	0.988724
48	ABCC2	0.0694989	0.0989706
49	ABCC3	0.501281	0.640521
50	ABCC4	0.3426	0.994772
51	ABCC5	0.387535	0.498484
52	ABCC6	0.355682	0.453784
53	ABCC8	0.0218338	0.457801
54	ABCC9	0.629171	0.418394
55	ABCD1	0.132463	0.368404
56	ABCD2	0.442026	0.105797
57	ABCD3	0.0829514	0.383293
58	ABCD4	-0.171557	0.339144
59	ABCE1	0.219129	0.427966
60	ABCF1	-0.0814392	0.345053
61	ABCF2	0.0326069	0.290801
62	ABCF3	0.195842	0.250443
63	ABCG1	0.0679869	0.56436
64	ABCG2	0.603778	0.454784
65	ABCG4	0.224871	0.042104
66	ABCG5		0.042104
67	ABCG8	-0.0955036	0.0618705
68	ABHD1	0.396637	0.372296
69	ABHD10	0.355321	0.369956
70	ABHD11	0.14361	0.582402
71	ABHD12	0.0295061	0.68537
72	ABHD12B	0.142272	0.0357233
73	ABHD13	0.125254	0.361873
74	ABHD14A	0.251207	0.541536
75	ABHD14B	0.441723	0.41452
76	ABHD15	0.140686	0.364187
77	ABHD16A	0.0192749	0.176444
78	ABHD17A	-0.174283	0.422958
79	ABHD17B	0.0450936	0.502302
80	ABHD17C	0.336529	0.567328
81	ABHD18	0.09762	0.385035
82	ABHD2	-0.00902686	1.01328
83	ABHD3	0.167057	0.44931
84	ABHD4	0.215838	0.406214
85	ABHD5	0.172853	0.280642
86	ABHD6	0.534544	0.289998
87	ABHD8	-0.0305939	0.478958
88	ABI1	-0.0683961	0.420222
89	ABI2	-0.135977	0.331435
90	ABI3	0.273363	0.568082
91	ABI3BP	0.405905	0.538782
92	ABITRAM	0.253109	0.333959
93	ABL1	0.0884767	0.424206
94	ABL2	0.0707499	0.281722
95	ABLIM1	0.238858	0.747076
96	ABLIM2	0.046382	0.315962
97	ABLIM3	0.00441606	0.541435
98	ABO	0.498824	0.690676
99	ABR	0.405229	0.357314
100	ABRACL	0.161874	0.702331
101	ABRAXAS1	0.181757	0.236752
102	ABRAXAS2	-0.11929	0.344738
103	ABT1	0.0301952	0.363384
104	ABTB1	0.0160909	0.576365
105	ABTB2	0.0967928	0.58385
106	ACAA1	0.419428	0.368908
107	ACAA2	0.481904	0.527264
108	ACACA	0.369082	0.614125
109	ACACB	0.584426	0.451283
110	ACAD10	0.227719	0.329486
111	ACAD11	0.196129	0.0831667
112	ACAD8	0.141916	0.884775
113	ACAD9	0.143306	0.265667
114	ACADL	0.488595	0.901384
115	ACADM	-0.0463301	0.544978
116	ACADS	0.208114	0.545322
117	ACADSB	-0.0326243	0.701103
118	ACADVL	0.11879	0.512368
119	ACAN	0.0837527	0.375668
120	ACAP1	0.310842	0.478524
121	ACAP2	0.118942	0.454852
122	ACAP3	0.112257	0.530607
123	ACAT1	0.269083	0.489178
124	ACAT2	0.261235	0.611925
125	ACBD3	-0.191166	0.521636
126	ACBD4	0.0442809	0.520289
127	ACBD5	0.0552516	0.431805
128	ACBD6	0.154304	0.317255
129	ACBD7	0.206415	0.323475
130	ACCS	-0.0941577	0.610002
131	ACD	-0.151887	0.419682
132	ACE	0.323071	0.5241
133	ACE2	0.149076	0.0887761
134	ACER2	-0.0620118	0.784356
135	ACER3	0.0509305	0.773407
136	ACHE	0.245534	0.73638
137	ACIN1	0.0365095	0.414152
138	ACKR1	0.194842	1.11106
139	ACKR2	0.290481	0.297618
140	ACKR3	0.455945	0.674742
141	ACKR4	0.110899	0.0819642
142	ACLY	0.189718	0.627076
143	ACMSD	0.0644381	0.0681646
144	ACO1	0.31197	0.36885
145	ACO2	-0.183804	0.493178
146	ACOT1	0.115386	0.50461
147	ACOT11	0.596753	0.302803
148	ACOT13	0.277621	0.295993
149	ACOT2	0.243287	0.449299
150	ACOT4	0.143431	0.34372
151	ACOT7	-0.00554464	0.370462
152	ACOT8	0.389941	0.328381
153	ACOT9	0.345502	0.323316
154	ACOX1	0.204054	0.35995
155	ACOX2	0.496108	0.64067
156	ACOX3	0.32689	0.433483
157	ACOXL	0.446145	0.384619
158	ACP1	0.288008	0.276768
159	ACP2	0.600489	0.415272
160	ACP3	0.465627	1.3217
161	ACP4	0.0877396	0.308499
162	ACP5	0.322376	1.10959
163	ACP6	0.306794	0.392772
164	ACP7	0.425856	0.106723
165	ACR	0.0418633	0.118075
166	ACRBP	0.171598	0.306496
167	ACRV1	0.481337	0.290086
168	ACSBG1	0.0974861	0.234401
169	ACSBG2	0.1009	0.0521719
170	ACSF2	0.529731	0.716745
171	ACSF3	-0.218473	0.333804
172	ACSL1	0.0186137	0.71393
173	ACSL3	0.160459	0.772384
174	ACSL4	0.666602	0.476851
175	ACSL5	0.189062	1.18803
176	ACSL6	0.128793	0.0699863
177	ACSM1	0.319279	1.73268
178	ACSM3	0.232436	0.888441
179	ACSM4	-0.0803327	0.0383155
180	ACSM5	0.220504	0.111942
181	ACSS1	0.198291	0.464831
182	ACSS2	0.490247	0.305624
183	ACSS3	0.652634	0.30584
184	ACTA1	0.484228	1.42948
185	ACTA2	0.686529	0.921895
186	ACTB	0.456303	0.44517
187	ACTC1	0.651601	1.13277
188	ACTG1	0.145546	0.453151
189	ACTG2	0.678482	1.18492
190	ACTL6A	-0.0105013	0.465298
191	ACTN1	0.598835	0.615876
192	ACTN2	0.266234	0.895091
193	ACTN3	0.326298	0.0593895
194	ACTN4	0.374806	0.444467
195	ACTR10	0.129927	0.262382
196	ACTR1A	0.138114	0.363446
197	ACTR1B	0.0304075	0.296519
198	ACTR2	0.0185696	0.526603
199	ACTR3	0.368994	0.355596
200	ACTR3B	0.412894	0.242767
201	ACTR3C	0.251298	0.164202
202	ACTR5	0.10772	0.259956
203	ACTR6	-0.011039	0.335713
204	ACTR8	0.0952134	0.352257
205	ACTRT3	0.303438	0.246247
206	ACVR1	0.258992	0.439773
207	ACVR1B	0.246698	0.474395
208	ACVR1C	0.113315	0.0834796
209	ACVR2A	0.0673603	0.377021
210	ACVR2B	0.19223	0.313367
211	ACVRL1	0.407013	0.473663
212	ACY1	0.369182	0.113418
213	ACY3	0.129406	0.767031
214	ACYP1	0.047854	0.416746
215	ACYP2	0.28469	0.274988
216	ADA	0.495952	0.325632
217	ADA2	0.52886	0.5983
218	ADAD2	0.161	0.107221
219	ADAM10	-0.0169639	0.570013
220	ADAM11	0.294631	0.256112
221	ADAM12	0.333987	0.238186
222	ADAM15	0.39754	0.363379
223	ADAM17	0.0841664	0.317865
224	ADAM19	0.652888	0.403801
225	ADAM20	-0.0762023	0.0568674
226	ADAM21	0.301884	0.313986
227	ADAM22	0.468383	0.521486
228	ADAM23	0.485164	0.230674
229	ADAM28	0.446012	0.492356
230	ADAM32	0.040516	0.236167
231	ADAM33	0.693887	0.54646
232	ADAM8	0.107875	0.54749
233	ADAM9	-0.116549	0.807618
234	ADAMDEC1	0.153181	0.636084
235	ADAMTS1	0.63509	0.967675
236	ADAMTS10	0.539512	0.39734
237	ADAMTS12	0.207236	0.239874
238	ADAMTS13	0.272203	0.395264
239	ADAMTS14	0.0339844	0.176385
240	ADAMTS15	0.498042	0.27459
241	ADAMTS16	0.135488	0.148401
242	ADAMTS17	-0.0532203	0.217291
243	ADAMTS18	-0.0302869	0.0998275
244	ADAMTS2	0.327521	0.619122
245	ADAMTS3	-0.110328	0.425529
246	ADAMTS4	0.383133	0.838684
247	ADAMTS5	0.571378	0.362363
248	ADAMTS6	0.0236983	0.236868
249	ADAMTS7	0.398137	0.188864
250	ADAMTS8	0.601621	0.448544
251	ADAMTS9	0.421213	0.512676
252	ADAMTSL1	0.131367	1.04435
253	ADAMTSL2	0.350932	0.535826
254	ADAMTSL3	0.333618	0.626753
255	ADAMTSL4	0.551706	0.349407
256	ADAMTSL5	0.202194	0.321123
257	ADAP1	-0.0488681	0.346024
258	ADAP2	0.270685	0.351746
259	ADAR	0.0296954	0.511119
260	ADARB1	0.233785	0.369214
261	ADARB2	0.295011	0.600927
262	ADAT1	0.013826	0.440624
263	ADAT2	-0.0210635	0.409232
264	ADAT3	0.0699574	0.369273
265	ADCK1	0.155862	0.30358
266	ADCK2	0.195381	0.343166
267	ADCK5	0.105712	0.547248
268	ADCY1	0.0246934	0.708957
269	ADCY10	0.226001	0.131684
270	ADCY2	0.384148	0.49606
271	ADCY3	0.617485	0.465262
272	ADCY4	0.314338	0.432361
273	ADCY5	0.657602	0.570119
274	ADCY6	0.293307	0.544863
275	ADCY7	0.40007	0.311077
276	ADCY9	0.352126	0.37832
277	ADCYAP1	0.254838	0.261398
278	ADCYAP1R1	0.657457	0.206472
279	ADD1	0.166538	0.258066
280	ADD2	0.293195	0.452008
281	ADD3	0.292076	0.814079
282	ADGRA2	0.647857	0.793216
283	ADGRA3	-0.298714	0.392647
284	ADGRB1	0.16696	0.387267
285	ADGRB2	0.133694	0.355948
286	ADGRB3	0.537987	0.154613
287	ADGRD1	0.348063	0.371098
288	ADGRE1	0.212829	0.131952
289	ADGRE2	0.303652	0.266983
290	ADGRE3	0.222214	0.147702
291	ADGRE5	0.107033	0.706396
292	ADGRF1	0.168618	1.18459
293	ADGRF3	-0.297392	0.0927578
294	ADGRF5	0.13445	1.39104
295	ADGRG1	-0.000373346	0.551185
296	ADGRG2	0.369238	0.444856
297	ADGRG3	0.08453	0.139432
298	ADGRG5	0.391315	0.251434
299	ADGRG6	0.502924	0.6042
300	ADGRL1	0.258138	0.583773
301	ADGRL2	0.345927	0.611218
302	ADGRL3	0.569398	0.163804
303	ADGRL4	0.321269	0.516579
304	ADGRV1	0.186541	0.310364
305	ADH1B	0.302611	0.416368
306	ADH1C	0.23796	0.790843
307	ADH5	0.532471	0.438082
308	ADH6	-0.186073	0.253462
309	ADHFE1	0.29892	0.521625
310	ADI1	0.543176	0.337056
311	ADIPOR1	0.1743	0.37888
312	ADIPOR2	-0.00205254	0.343922
313	ADK	-0.025096	0.347526
314	ADM	0.148484	0.990076
315	ADM2	0.47937	0.627445
316	ADM5	-0.0484186	0.359096
317	ADNP	-0.00528858	0.46436
318	ADNP2	-0.203614	0.433984
319	ADO	0.0474349	0.285766
320	ADORA1	0.339548	0.153959
321	ADORA2A	-0.0923438	0.0803421
322	ADORA2B	0.377159	0.373587
323	ADORA3	0.242724	0.389893
324	ADPGK	0.274093	0.506034
325	ADPRH	0.0881789	0.599425
326	ADPRHL1	-0.0931226	0.51519
327	ADPRM	0.256111	0.589601
328	ADPRS	0.136218	0.3471
329	ADRA1A	0.627053	0.359061
330	ADRA1B	0.277191	0.100591
331	ADRA1D	0.521238	0.520281
332	ADRA2A	0.231581	0.928076
333	ADRA2B	0.237614	0.210064
334	ADRA2C	0.310009	0.848222
335	ADRB1	0.402408	0.69939
336	ADRB2	0.0112114	0.748212
337	ADRM1	0.319636	0.341288
338	ADSL	0.365056	0.147679
339	ADSS1	0.028562	0.359802
340	ADSS2	-0.0265392	0.506432
341	ADTRP	-0.0919948	0.372407
342	AEBP1	0.476972	0.846811
343	AEBP2	0.36147	0.370569
344	AEN	-0.0927082	0.486493
345	AFAP1	0.112487	0.273837
346	AFAP1L1	0.521154	0.311469
347	AFAP1L2	0.517703	0.594468
348	AFDN	-0.0720175	0.629766
349	AFF1	-0.0824025	0.55696
350	AFF2	0.505445	0.137617
351	AFF3	0.295674	1.01027
352	AFF4	0.0440842	0.575524
353	AFG1L	-0.0265567	0.193134
354	AFG3L2	-0.14072	0.50958
355	AFMID	0.378175	0.587938
356	AFTPH	0.0674752	0.426979
357	AGA	0.387733	0.415149
358	AGAP1	0.203997	0.416315
359	AGAP2	0.200805	0.254987
360	AGAP3	0.127788	0.350184
361	AGAP4	0.154248	0.290359
362	AGAP5	-0.129181	0.0999555
363	AGAP6	0.168887	0.152301
364	AGAP9	-0.0516083	0.510683
365	AGBL2	0.105244	0.201582
366	AGBL3	0.17675	0.195047
367	AGBL4	0.0563675	0.112689
368	AGBL5	0.111283	0.306153
369	AGER	0.0225456	0.6118
370	AGFG1	0.103393	0.400542
371	AGFG2	0.269539	0.519183
372	AGGF1	0.00716762	0.308685
373	AGK	0.21651	0.281226
374	AGL	0.157073	0.47208
375	AGMAT	0.352559	0.555563
376	AGMO	-0.0201644	0.256845
377	AGO1	0.107586	0.291723
378	AGO2	0.325857	0.45187
379	AGO3	0.308976	0.225444
380	AGO4	0.272528	0.398774
381	AGPAT1	0.356758	0.336631
382	AGPAT2	-0.0475522	0.586773
383	AGPAT3	0.320115	0.325683
384	AGPAT4	0.641981	0.186395
385	AGPAT5	0.0512047	0.528431
386	AGPS	0.341738	0.422972
387	AGR2	0.0757559	1.49535
388	AGRN	0.223885	0.637803
389	AGRP	0.0410507	0.119048
390	AGT	0.0543522	1.53285
391	AGTPBP1	0.102473	0.411522
392	AGTR1	0.347235	1.29577
393	AGTRAP	0.521796	0.48956
394	AHCTF1	0.249703	0.352773
395	AHCY	0.457485	0.380912
396	AHCYL1	-0.144995	0.402378
397	AHCYL2	0.0602092	0.464042
398	AHDC1	0.51958	0.392416
399	AHI1	0.056519	0.396191
400	AHNAK	0.363413	0.725239
401	AHNAK2	0.66413	0.502918
402	AHR	0.442757	0.599147
403	AHRR	0.118412	0.0835504
404	AHSA1	0.278138	0.319544
405	AIDA	0.269591	0.659716
406	AIF1	0.318739	0.770622
407	AIF1L	0.483684	0.427818
408	AIFM1	0.583047	0.268528
409	AIFM2	0.598955	0.387611
410	AIFM3	0.103777	0.182251
411	AIG1	0.398406	0.23191
412	AIM2	0.416279	0.32121
413	AIMP1	-0.0693612	0.304715
414	AIMP2	0.521735	0.376643
415	AIP	0.0113067	0.443729
416	AIRE	0.291726	0.0617409
417	AJAP1	0.503859	0.187052
418	AJM1	0.29576	0.465501
419	AJUBA	0.502301	0.527938
420	AK1	-0.0497159	0.3318
421	AK2	0.283047	0.279228
422	AK3	0.114781	0.396214
423	AK4	0.228874	0.567908
424	AK5	0.314279	0.931794
425	AK6	0.187504	0.359755
426	AK7	0.0749972	0.288414
427	AK8	0.188354	0.287016
428	AK9	-0.126301	0.282304
429	AKAP1	0.0301715	0.441922
430	AKAP10	0.0925025	0.338283
431	AKAP11	0.147959	0.570518
432	AKAP12	0.653335	0.660909
433	AKAP13	0.247027	0.563981
434	AKAP17A	-0.0868982	0.544386
435	AKAP3	0.289603	0.292859
436	AKAP5	0.291238	0.27987
437	AKAP6	0.429155	0.221205
438	AKAP7	0.446661	0.554003
439	AKAP8	0.0133207	0.294792
440	AKAP8L	0.0326445	0.423583
441	AKAP9	-0.0540267	0.577396
442	AKIP1	0.200941	0.275052
443	AKIRIN1	0.135427	0.58047
444	AKIRIN2	0.290379	0.392676
445	AKNA	0.384182	0.501847
446	AKR1A1	0.552092	0.309589
447	AKR1B1	0.401726	0.627546
448	AKR1B10	-0.122995	0.22758
449	AKR1B15	-0.0134286	0.0635739
450	AKR1C1	0.265503	0.462319
451	AKR1C2	0.233544	0.344645
452	AKR1C3	0.210206	0.691267
453	AKR1E2	0.0436067	0.386749
454	AKR7A2	0.307775	0.367972
455	AKR7A3	0.0988468	0.45254
456	AKT1	0.111215	0.427565
457	AKT1S1	0.423854	0.322239
458	AKT2	0.101959	0.287559
459	AKT3	0.0958863	0.529922
460	AKTIP	-0.00299585	0.347777
461	ALAD	0.462758	0.522212
462	ALAS1	0.326021	0.400885
463	ALAS2	0.167039	0.0844712
464	ALB	0.209124	1.02399
465	ALCAM	0.115209	0.632655
466	ALDH16A1	-0.110935	0.493805
467	ALDH18A1	0.25522	0.461526
468	ALDH1A1	0.110849	1.35604
469	ALDH1A2	0.705181	0.628076
470	ALDH1A3	0.268762	0.811854
471	ALDH1B1	0.411876	0.483615
472	ALDH1L1	0.0295833	0.760307
473	ALDH1L2	0.581226	0.272248
474	ALDH2	0.486839	0.755595
475	ALDH3A1	0.219006	0.288478
476	ALDH3A2	0.43176	0.504352
477	ALDH3B1	0.344968	0.385405
478	ALDH4A1	0.440206	0.60275
479	ALDH5A1	0.141311	0.40971
480	ALDH6A1	0.273615	0.584613
481	ALDH7A1	0.280423	0.491668
482	ALDH8A1	0.0370188	0.165318
483	ALDH9A1	0.117012	0.509733
484	ALDOA	0.180932	0.459342
485	ALDOB	0.0731416	0.101201
486	ALDOC	0.20019	0.571379
487	ALG1	0.391824	0.290057
488	ALG10	-0.0698911	0.260146
489	ALG10B	-0.214087	0.346936
490	ALG11	-0.0634204	0.309541
491	ALG12	-0.0240108	0.366983
492	ALG13	0.27525	0.290188
493	ALG14	0.452058	0.210476
494	ALG1L2	-0.00922754	0.141166
495	ALG2	0.20463	0.390201
496	ALG3	0.52016	0.319471
497	ALG5	0.560738	0.460546
498	ALG6	0.431699	0.323121
499	ALG8	0.3395	0.310954
500	ALG9	0.0196115	0.182482
501	ALK	-0.105119	0.0454615
502	ALKAL2	0.323089	0.253036
503	ALKBH1	0.219907	0.21802
504	ALKBH2	0.293393	0.462905
505	ALKBH3	0.154487	0.340875
506	ALKBH4	0.112977	0.319073
507	ALKBH5	0.141518	0.376386
508	ALKBH6	-0.193124	0.218594
509	ALKBH7	0.28594	0.577506
510	ALKBH8	0.192614	0.259454
511	ALMS1	0.0753715	0.357352
512	ALOX12	0.0982641	0.130455
513	ALOX15	0.251206	1.08451
514	ALOX15B	0.423429	2.34316
515	ALOX5	-0.0476579	0.721208
516	ALOX5AP	0.308286	0.656856
517	ALPK1	0.490517	0.342425
518	ALPK2	0.0923664	0.114971
519	ALPK3	0.0945662	0.436102
520	ALPL	0.204695	0.842417
521	ALS2	0.138897	0.287403
522	ALS2CL	0.360552	0.535557
523	ALX4	0.368834	0.36673
524	ALYREF	0.281975	0.399467
525	AMACR	0.333955	1.25526
526	AMBP	0.182317	0.309776
527	AMBRA1	0.0830805	0.381281
528	AMD1	0.182485	0.900723
529	AMDHD1	-0.0510886	0.119399
530	AMDHD2	-0.00836895	0.433408
531	AMER1	0.222046	0.281606
532	AMFR	0.154245	0.301975
533	AMH	0.315018	0.65853
534	AMHR2	0.132073	0.118166
535	AMIGO1	0.0628793	0.387198
536	AMIGO2	0.369312	0.66347
537	AMMECR1	0.121117	0.493833
538	AMMECR1L	0.0544787	0.38722
539	AMN	0.162274	0.208522
540	AMN1	-0.0852422	0.278213
541	AMOT	0.469626	0.670357
542	AMOTL1	-0.181041	0.821104
543	AMOTL2	0.483515	0.655008
544	AMPD2	-0.0620259	0.327769
545	AMPD3	0.128885	0.860061
546	AMPH	0.399842	0.188116
547	AMT	-0.385563	0.0885783
548	AMY2B	0.310343	0.396422
549	AMZ1	0.389559	0.0770492
550	AMZ2	-0.0776573	0.267279
551	ANAPC1	0.162272	0.327422
552	ANAPC10	0.0173485	0.136244
553	ANAPC11	0.418048	0.433157
554	ANAPC13	0.4281	0.324016
555	ANAPC15	0.193745	0.324897
556	ANAPC16	0.350324	0.33057
557	ANAPC2	-0.0591683	0.45212
558	ANAPC4	0.174831	0.364998
559	ANAPC5	0.4948	0.285782
560	ANAPC7	0.0290477	0.292265
561	ANG	0.475919	0.841479
562	ANGEL1	0.133214	0.365547
563	ANGEL2	-0.21429	0.375212
564	ANGPT1	0.6516	0.559582
565	ANGPT2	0.238891	0.517156
566	ANGPT4	0.296094	0.10129
567	ANGPTL1	0.572735	0.510299
568	ANGPTL2	0.488512	0.732024
569	ANGPTL3	0.278833	0.663334
570	ANGPTL4	0.330452	1.10847
571	ANGPTL6	-0.0993379	0.0969725
572	ANGPTL8	0.0928772	0.123378
573	ANK1	0.270516	0.429297
574	ANK2	0.625927	0.277807
575	ANK3	0.300754	0.60172
576	ANKAR	0.150963	0.195616
577	ANKDD1A	0.556589	0.3358
578	ANKDD1B	0.32938	0.27609
579	ANKEF1	0.240253	0.334637
580	ANKFN1	-0.0561984	0.0984234
581	ANKFY1	0.212589	0.461368
582	ANKH	0.105258	0.708062
583	ANKHD1	-0.197152	0.104718
584	ANKIB1	-0.0707195	0.528697
585	ANKK1	0.0791481	0.371373
586	ANKLE1	0.161986	0.160054
587	ANKLE2	-0.0487867	0.260568
588	ANKMY1	0.152145	0.255402
589	ANKMY2	0.289979	0.32006
590	ANKRA2	-0.0700718	0.522862
591	ANKRD1	0.214931	0.828854
592	ANKRD10	-0.0017339	0.64589
593	ANKRD11	0.0350913	0.398831
594	ANKRD12	0.185211	0.396753
595	ANKRD13A	0.344349	0.411247
596	ANKRD13B	0.483891	0.474269
597	ANKRD13C	0.0206654	0.304291
598	ANKRD13D	-0.0245553	0.463083
599	ANKRD16	0.19545	0.366235
600	ANKRD17	-0.0307118	0.526848
601	ANKRD18A	0.100795	0.271783
602	ANKRD18B	-0.105907	0.326025
603	ANKRD2	0.150806	0.365328
604	ANKRD22	-0.00581603	0.714283
605	ANKRD23	0.0223899	0.246326
606	ANKRD24	0.0874359	0.475187
607	ANKRD26	-0.0334056	0.247926
608	ANKRD27	0.202443	0.328701
609	ANKRD28	0.179107	0.361486
610	ANKRD29	0.220152	0.811579
611	ANKRD31	0.0447364	0.0675482
612	ANKRD33B	0.620403	0.244045
613	ANKRD34A	-0.0886002	0.359664
614	ANKRD35	0.639807	0.480343
615	ANKRD36	0.109722	0.221211
616	ANKRD36B	0.0299296	0.200027
617	ANKRD36C	0.362035	0.158474
618	ANKRD37	0.326716	0.797402
619	ANKRD39	0.062718	0.216984
620	ANKRD40	0.228301	0.391479
621	ANKRD42	0.152344	0.257128
622	ANKRD44	0.405835	0.331846
623	ANKRD45	-0.104787	0.0815338
624	ANKRD46	0.0790977	0.364028
625	ANKRD49	0.0181197	0.329689
626	ANKRD50	0.181629	0.647177
627	ANKRD52	0.221733	0.437449
628	ANKRD53	0.303706	0.243079
629	ANKRD54	0.313573	0.296292
630	ANKRD55	0.156282	0.0845176
631	ANKRD6	0.163769	0.383034
632	ANKRD61	-0.0962198	0.24461
633	ANKRD65	0.364283	0.670405
634	ANKRD9	0.146937	0.448932
635	ANKS1A	0.226986	0.346165
636	ANKS1B	0.0221885	0.17155
637	ANKS3	0.247362	0.455378
638	ANKS6	0.168976	0.44778
639	ANKZF1	0.405185	0.499478
640	ANLN	0.440249	0.498844
641	ANO1	0.572144	0.600748
642	ANO10	-0.0894678	0.280591
643	ANO2	0.138975	0.165789
644	ANO3	0.0425711	0.180607
645	ANO4	0.632967	0.4701
646	ANO5	0.482419	0.464907
647	ANO6	0.57093	0.585495
648	ANO7	0.512704	1.18143
649	ANO8	0.111394	0.438106
650	ANO9	0.18188	0.662346
651	ANOS1	0.0685721	0.647781
652	ANP32A	0.135957	0.343521
653	ANP32B	-0.0663241	0.407277
654	ANP32E	0.645694	0.506982
655	ANPEP	0.418033	2.33429
656	ANTKMT	0.31393	0.564153
657	ANTXR1	0.597265	0.72477
658	ANTXR2	0.394284	0.75583
659	ANXA1	0.485096	0.913611
660	ANXA10	-0.114643	0.195027
661	ANXA11	0.317298	0.40282
662	ANXA13	-0.171075	0.229801
663	ANXA2	0.551077	0.71479
664	ANXA2R	-0.166337	0.651548
665	ANXA3	0.294062	0.732749
666	ANXA4	0.390522	0.359338
667	ANXA5	-0.239109	0.538553
668	ANXA6	0.607761	0.619619
669	ANXA7	-0.0133557	0.386065
670	ANXA8	0.22529	0.374559
671	ANXA9	-0.0738084	0.586291
672	AOAH	0.30503	0.548107
673	AOC1	0.397726	1.64176
674	AOC2	0.0515395	0.337765
675	AOC3	0.677445	0.720093
676	AOPEP	0.552004	0.428768
677	AOX1	0.640555	0.802671
678	AP1AR	0.08948	0.398564
679	AP1B1	0.229378	0.478726
680	AP1G1	0.158616	0.512547
681	AP1G2	0.235003	0.534364
682	AP1M1	0.0187902	0.213369
683	AP1M2	0.631877	0.415252
684	AP1S1	0.537683	0.393512
685	AP1S2	0.34537	0.331337
686	AP1S3	0.220662	0.401545
687	AP2A1	0.290435	0.307759
688	AP2A2	-0.132029	0.300161
689	AP2B1	0.183107	0.340607
690	AP2M1	0.291734	0.2741
691	AP2S1	0.421232	0.57717
692	AP3B1	0.163928	0.393171
693	AP3B2	-0.0226348	0.267311
694	AP3D1	0.297413	0.388765
695	AP3M1	-0.0782084	0.495319
696	AP3M2	0.107498	0.388432
697	AP3S1	-0.27084	0.335188
698	AP3S2	0.133943	0.244962
699	AP4B1	-0.0694995	0.274363
700	AP4E1	0.207922	0.302683
701	AP4M1	0.34066	0.327146
702	AP4S1	0.515086	0.138376
703	AP5B1	0.399415	0.36391
704	AP5M1	-0.0253473	0.290312
705	AP5S1	-0.0183639	0.23727
706	AP5Z1	-0.00163143	0.400743
707	APAF1	0.00449175	0.472473
708	APBA1	0.124467	0.326064
709	APBA2	0.474512	0.545888
710	APBA3	-0.0580549	0.301571
711	APBB1	0.429949	0.528742
712	APBB1IP	0.363997	0.523633
713	APBB2	0.218054	0.324014
714	APBB3	-0.00156701	0.524694
715	APC	0.10177	0.475934
716	APC2	0.171162	0.155079
717	APCDD1	0.272787	0.774719
718	APCDD1L	0.256872	0.117277
719	APEH	0.505626	0.3585
720	APEX1	0.330132	0.458246
721	APEX2	0.143103	0.264405
722	APH1A	0.0340094	0.432119
723	APH1B	0.0475262	0.466197
724	API5	-0.0176363	0.421995
725	APIP	0.0306665	0.366933
726	APLF	0.59184	0.202424
727	APLN	0.447752	0.722297
728	APLNR	0.0319721	0.639672
729	APLP1	-0.10185	0.551441
730	APLP2	0.363961	0.458216
731	APMAP	0.296532	0.412847
732	APOA1	-0.00828121	0.297979
733	APOB	0.289392	0.107075
734	APOBEC2	-0.00839596	0.370898
735	APOBEC3A	0.0720927	0.193818
736	APOBEC3B	0.140536	0.30651
737	APOBEC3C	0.583415	0.863378
738	APOBEC3D	0.313235	0.122525
739	APOBEC3F	0.416139	0.485296
740	APOBEC3G	0.489657	0.550529
741	APOBEC3H	0.162225	0.277404
742	APOBR	0.0836019	0.516007
743	APOC1	-0.0258031	1.14031
744	APOD	-0.0184717	1.28611
745	APOE	-0.0348854	1.22872
746	APOF	0.341197	1.00944
747	APOL1	0.533268	0.82464
748	APOL2	0.0371167	0.47523
749	APOL3	0.266231	0.687727
750	APOL4	0.0516351	1.34756
751	APOL6	0.376519	0.681711
752	APOLD1	0.301271	0.764523
753	APOM	0.21918	0.331768
754	APOO	0.317671	0.345572
755	APOOL	-0.01655	0.507087
756	APP	-0.0558369	0.846382
757	APPBP2	-0.108825	0.405296
758	APPL1	-0.0667749	0.4143
759	APPL2	-0.0750458	0.542254
760	APRT	0.448204	0.617132
761	APTR	0.0267594	0.341471
762	APTX	0.346642	0.182928
763	AQP1	0.37259	0.740844
764	AQP11	0.148288	0.759573
765	AQP3	0.353374	0.973912
766	AQP5	0.474818	0.342531
767	AQP6	-0.140664	0.123761
768	AQP7	0.309516	0.145292
769	AQP8	0.11386	0.184745
770	AQP9	0.0756442	0.290889
771	AQR	-0.182592	0.414847
772	AR	0.0264285	0.588385
773	ARAF	0.267105	0.3554
774	ARAP1	0.229291	0.469553
775	ARAP2	0.0878647	0.401987
776	ARAP3	0.238568	0.528669
777	ARC	0.103032	0.463245
778	ARCN1	0.0235856	0.427595
779	AREG	0.257893	0.950906
780	AREL1	0.28644	0.357088
781	ARF1	0.391498	0.344053
782	ARF3	0.203439	0.314393
783	ARF4	0.270273	0.474586
784	ARF5	0.285415	0.406031
785	ARF6	0.174977	0.426178
786	ARFGAP1	-0.146428	0.491629
787	ARFGAP2	0.0707229	0.326344
788	ARFGAP3	0.272515	0.490117
789	ARFGEF1	0.280441	0.355142
790	ARFGEF2	0.123461	0.5638
791	ARFGEF3	0.141872	0.86771
792	ARFIP1	-0.00468698	0.388774
793	ARFIP2	0.520373	0.398087
794	ARFRP1	-0.203417	0.509536
795	ARG1	-0.101995	0.26154
796	ARG2	0.390458	1.15826
797	ARGLU1	0.082338	0.745869
798	ARHGAP1	0.297262	0.375236
799	ARHGAP10	0.6116	0.386144
800	ARHGAP11A	0.38813	0.314227
801	ARHGAP11B	-0.014658	0.0910959
802	ARHGAP12	-0.227021	0.564237
803	ARHGAP15	0.389885	0.357373
804	ARHGAP17	0.357462	0.293862
805	ARHGAP18	0.168487	0.58995
806	ARHGAP19	0.0451741	0.311227
807	ARHGAP20	0.607511	0.359768
808	ARHGAP21	-0.088965	0.449252
809	ARHGAP22	0.320171	0.271176
810	ARHGAP23	0.684256	0.550802
811	ARHGAP24	0.489666	0.249421
812	ARHGAP25	0.435636	0.426141
813	ARHGAP26	0.00327986	0.468926
814	ARHGAP27	0.287212	0.436677
815	ARHGAP28	0.0687139	0.690726
816	ARHGAP29	-0.0864265	0.600656
817	ARHGAP30	0.352694	0.602175
818	ARHGAP31	0.503186	0.408476
819	ARHGAP32	0.0977277	0.570547
820	ARHGAP33	0.26032	0.511583
821	ARHGAP35	0.0748996	0.48131
822	ARHGAP39	0.451754	0.428859
823	ARHGAP4	0.283885	0.57932
824	ARHGAP40	0.24436	0.618537
825	ARHGAP42	0.0241997	0.359322
826	ARHGAP44	0.0883107	0.31596
827	ARHGAP45	0.236854	0.57733
828	ARHGAP5	0.173497	0.623951
829	ARHGAP6	-0.0649552	0.598139
830	ARHGAP8	-0.13332	0.291165
831	ARHGAP9	0.378633	0.50001
832	ARHGDIA	0.286297	0.432797
833	ARHGDIB	0.129866	0.971523
834	ARHGDIG	0.430067	0.754373
835	ARHGEF1	0.103692	0.494533
836	ARHGEF10	-0.0786816	0.116265
837	ARHGEF10L	0.407783	0.414067
838	ARHGEF11	0.245038	0.484054
839	ARHGEF12	-0.0057477	0.525062
840	ARHGEF15	0.346091	0.410516
841	ARHGEF16	0.451419	0.410587
842	ARHGEF17	0.471732	0.504286
843	ARHGEF18	-0.0224777	0.246646
844	ARHGEF19	0.134771	0.732608
845	ARHGEF2	0.507414	0.445543
846	ARHGEF25	0.680625	0.421097
847	ARHGEF26	0.375788	0.698417
848	ARHGEF28	0.544345	0.413692
849	ARHGEF3	0.0694995	0.622664
850	ARHGEF33	-0.282293	0.117446
851	ARHGEF35	-0.197907	0.541138
852	ARHGEF37	0.193243	0.600998
853	ARHGEF38	0.361678	0.613759
854	ARHGEF39	0.32763	0.209091
855	ARHGEF4	0.101811	0.3857
856	ARHGEF40	0.570901	0.418905
857	ARHGEF5	0.166781	0.339995
858	ARHGEF6	0.432631	0.474188
859	ARHGEF7	0.151835	0.438806
860	ARHGEF9	0.247434	0.267328
861	ARID1A	-0.021861	0.525259
862	ARID1B	0.091845	0.33891
863	ARID2	0.0854065	0.368732
864	ARID3A	0.0250297	0.356601
865	ARID3B	0.163409	0.251253
866	ARID3C	-0.272538	0.128064
867	ARID4A	-0.0567735	0.431597
868	ARID4B	0.0568157	0.366053
869	ARID5A	0.308602	0.844629
870	ARID5B	-0.0753988	0.600915
871	ARIH1	-0.0239996	0.311909
872	ARIH2	0.259552	0.318338
873	ARL1	0.0891033	0.3689
874	ARL10	0.553723	0.216493
875	ARL11	0.224638	0.192411
876	ARL13A	0.154185	0.0978669
877	ARL13B	0.0262821	0.416485
878	ARL14EP	-0.068535	0.287498
879	ARL15	-0.0905981	0.485326
880	ARL16	0.0185825	0.517932
881	ARL17A	-0.216239	0.161123
882	ARL17B	-0.293868	0.149511
883	ARL2	-0.0551104	0.618065
884	ARL2BP	0.372245	0.160936
885	ARL3	-0.00180866	0.36324
886	ARL4A	0.427883	0.505512
887	ARL4C	0.652889	0.5684
888	ARL4D	0.607254	0.686306
889	ARL5A	-0.0276032	0.422553
890	ARL5B	-0.0767344	0.533651
891	ARL6	0.0116268	0.353036
892	ARL6IP1	0.262716	0.44785
893	ARL6IP4	-0.0493029	0.165252
894	ARL6IP5	0.248118	0.458345
895	ARL6IP6	-0.00926315	0.380304
896	ARL8A	-0.0858404	0.295384
897	ARL8B	0.203736	0.331071
898	ARL9	-0.216733	0.364975
899	ARMC1	0.0227473	0.366209
900	ARMC10	0.0482177	0.272866
901	ARMC12	0.198464	0.376981
902	ARMC2	-0.00131325	0.232019
903	ARMC5	0.0207363	0.41803
904	ARMC6	0.438753	0.368643
905	ARMC7	-0.00614583	0.386156
906	ARMC8	0.0860294	0.285154
907	ARMC9	0.0470169	0.22123
908	ARMCX1	0.576995	0.939572
909	ARMCX2	0.254307	0.822365
910	ARMCX3	0.106257	0.418426
911	ARMCX4	0.450095	0.441154
912	ARMCX5	0.168287	0.341998
913	ARMCX6	-0.0543381	0.357317
914	ARMH1	0.191165	0.381802
915	ARMH3	0.0873826	0.292781
916	ARMH4	0.536404	0.215206
917	ARMT1	0.00780422	0.407546
918	ARNT	0.303339	0.352865
919	ARNT2	-0.0521954	0.554797
920	ARPC1A	0.196387	0.44756
921	ARPC1B	0.236591	0.141389
922	ARPC2	0.390282	0.336836
923	ARPC3	0.404666	0.342201
924	ARPC4	-0.0660693	0.472161
925	ARPC5	0.245178	0.281593
926	ARPC5L	0.273471	0.379779
927	ARPIN	-0.0717976	0.398933
928	ARPP19	0.149483	0.357546
929	ARR3	-0.0734884	0.176036
930	ARRB1	0.430192	0.400069
931	ARRB2	0.107719	0.438133
932	ARRDC1	-0.16146	0.499597
933	ARRDC2	0.235798	0.678032
934	ARRDC3	0.375185	0.843197
935	ARRDC4	-0.159984	0.544818
936	ARRDC5	0.278165	0.162994
937	ARSA	0.255266	0.532263
938	ARSB	0.245177	0.331858
939	ARSD	0.264136	0.517228
940	ARSG	0.430375	0.355727
941	ARSI	0.548366	0.258008
942	ARSJ	0.552895	0.498166
943	ARSK	0.220807	0.368907
944	ARSL	0.26232	0.229497
945	ART3	0.224212	0.306453
946	ART4	0.179721	0.501685
947	ART5	0.199638	0.337516
948	ARTN	-0.0195197	0.3863
949	ARV1	0.193533	0.34594
950	ARVCF	0.507461	0.420518
951	ASAH1	-0.0212555	0.570392
952	ASAH2	0.0953822	0.11045
953	ASAH2B	0.179036	0.222731
954	ASAP1	0.434303	0.491184
955	ASAP2	0.16386	0.564914
956	ASAP3	0.240936	0.560497
957	ASB1	0.446465	0.297794
958	ASB12	0.217426	0.172548
959	ASB13	0.0229242	0.504944
960	ASB14	-0.181578	0.113793
961	ASB16	-0.0555548	0.285809
962	ASB2	0.691765	0.588617
963	ASB3	0.122608	0.405245
964	ASB4	0.00334228	0.0815728
965	ASB6	-0.131227	0.232762
966	ASB7	-0.112765	0.289737
967	ASB8	0.0548032	0.282027
968	ASB9	0.00210208	0.701585
969	ASCC1	0.0151987	0.353429
970	ASCC2	0.0323557	0.282159
971	ASCC3	0.349463	0.500019
972	ASCL2	0.212647	0.775496
973	ASCL5	0.0265761	0.118004
974	ASF1A	-0.172334	0.403878
975	ASF1B	0.540389	0.623043
976	ASGR1	0.206659	0.194668
977	ASGR2	0.21412	0.154857
978	ASH1L	0.201911	0.470439
979	ASH2L	0.0503406	0.3713
980	ASIC1	0.119666	0.440351
981	ASIC2	0.429979	0.361956
982	ASIC3	0.30476	0.498526
983	ASIC4	0.0142245	0.0819932
984	ASIP	-0.111826	0.186489
985	ASL	0.273754	0.361433
986	ASMT	0.479729	0.0596788
987	ASMTL	0.249722	0.362989
988	ASNS	0.165709	0.137279
989	ASNSD1	0.13605	0.216001
990	ASPA	0.627572	0.269679
991	ASPDH	-0.0483862	0.148859
992	ASPG	-0.183915	0.151098
993	ASPH	0.281165	0.546885
994	ASPHD1	0.243811	0.601947
995	ASPHD2	0.0933805	0.382335
996	ASPM	0.532026	0.328306
997	ASPN	0.134997	0.949882
998	ASPRV1	0.337564	0.238097
999	ASPSCR1	0.184827	0.411313
1000	ASRGL1	0.122323	0.847123
1001	ASS1	-0.234118	1.03869
1002	ASTE1	0.0954994	0.260638
1003	ASTN1	0.217639	0.182625
1004	ASTN2	0.430028	0.685769
1005	ASXL1	0.242674	0.389828
1006	ASXL2	0.0716601	0.451585
1007	ASXL3	0.560109	0.14639
1008	ATAD1	0.207034	0.691891
1009	ATAD2	0.111227	0.574663
1010	ATAD2B	0.272366	0.35034
1011	ATAD3A	0.351581	0.47364
1012	ATAD3B	0.133985	0.610475
1013	ATAD3C	0.269509	0.484485
1014	ATAD5	0.509382	0.235942
1015	ATAT1	0.428757	0.442872
1016	ATE1	0.1464	0.441535
1017	ATF1	-0.0360042	0.431226
1018	ATF2	-0.0581469	0.427042
1019	ATF3	0.408902	1.62186
1020	ATF4	0.398663	0.53278
1021	ATF5	0.33536	0.577945
1022	ATF6	0.182039	0.426178
1023	ATF6B	-0.0454204	0.470067
1024	ATF7	0.0985855	0.317379
1025	ATF7IP	0.272583	0.467309
1026	ATF7IP2	-0.0989587	0.498016
1027	ATG10	0.138986	0.242858
1028	ATG101	0.229225	0.443882
1029	ATG12	-0.115744	0.292991
1030	ATG13	0.218121	0.274114
1031	ATG14	-0.0541556	0.333259
1032	ATG16L1	-0.0176743	0.391234
1033	ATG16L2	0.114626	0.531691
1034	ATG2A	-0.0359776	0.350031
1035	ATG2B	-0.121522	0.435255
1036	ATG3	0.0990849	0.314765
1037	ATG4A	0.151855	0.358798
1038	ATG4B	-0.365135	0.427895
1039	ATG4C	-0.122268	0.343172
1040	ATG4D	0.18926	0.363601
1041	ATG5	0.410574	0.389798
1042	ATG7	-0.2364	0.250957
1043	ATG9A	0.00189265	0.586559
1044	ATG9B	0.357536	0.323592
1045	ATIC	0.101978	0.389021
1046	ATL1	-0.165465	0.446137
1047	ATL2	0.345196	0.407261
1048	ATL3	0.129917	0.396378
1049	ATM	0.246098	0.423496
1050	ATMIN	0.124101	0.409988
1051	ATN1	0.0360842	0.467576
1052	ATOH7	0.187312	0.145718
1053	ATOH8	0.282704	0.675033
1054	ATOX1	-0.0542654	0.482595
1055	ATP10A	-0.00212718	0.330577
1056	ATP10B	-0.0475107	0.043155
1057	ATP10D	0.482629	0.475574
1058	ATP11A	0.259885	0.98498
1059	ATP11B	-0.164275	0.763275
1060	ATP11C	0.329346	0.398566
1061	ATP13A1	0.197598	0.370123
1062	ATP13A2	0.501375	0.416778
1063	ATP13A3	-0.12034	0.551992
1064	ATP13A4	-0.092428	0.110026
1065	ATP1A1	0.0767621	0.993331
1066	ATP1A2	0.679918	0.812835
1067	ATP1A3	-0.0526847	0.0378034
1068	ATP1A4	0.27987	0.111674
1069	ATP1B1	0.394445	0.843514
1070	ATP1B2	0.451187	0.41972
1071	ATP1B3	-0.115854	0.444252
1072	ATP23	0.0178193	0.232801
1073	ATP2A1	0.135817	0.480008
1074	ATP2A2	0.359215	0.559001
1075	ATP2A3	0.333802	0.870722
1076	ATP2B1	0.0641256	0.513065
1077	ATP2B2	0.258285	0.044238
1078	ATP2B4	0.696614	0.73209
1079	ATP2C1	0.256787	0.573981
1080	ATP2C2	0.298808	0.707473
1081	ATP5F1A	0.205932	0.40378
1082	ATP5F1B	0.28398	0.408256
1083	ATP5F1C	0.273126	0.376837
1084	ATP5F1D	0.0408609	0.712838
1085	ATP5F1E	0.204639	0.523846
1086	ATP5IF1	0.60508	0.434022
1087	ATP5MC1	0.334254	0.461363
1088	ATP5MC2	0.297191	0.375332
1089	ATP5MC3	-0.0568218	0.396397
1090	ATP5ME	0.290201	0.716525
1091	ATP5MF	0.520432	0.452424
1092	ATP5MG	0.236744	0.403627
1093	ATP5MGL	0.175377	0.125985
1094	ATP5PB	0.182883	0.374051
1095	ATP5PD	0.262391	0.376346
1096	ATP5PF	0.189523	0.39459
1097	ATP5PO	0.119074	0.539487
1098	ATP6AP1	0.556704	0.387375
1099	ATP6AP2	-0.00421497	0.337545
1100	ATP6V0A1	0.473342	0.309943
1101	ATP6V0A2	-0.068322	0.237807
1102	ATP6V0B	0.495609	0.446615
1103	ATP6V0C	-0.183795	0.186486
1104	ATP6V0D1	0.268352	0.402844
1105	ATP6V0D2	0.151814	0.267657
1106	ATP6V0E1	0.388696	0.327301
1107	ATP6V0E2	0.520339	0.551248
1108	ATP6V1A	0.000259729	0.51685
1109	ATP6V1B2	-0.0473487	0.383094
1110	ATP6V1C1	0.0968963	0.367857
1111	ATP6V1C2	0.0786051	0.560163
1112	ATP6V1D	0.315863	0.316677
1113	ATP6V1E1	0.25942	0.308189
1114	ATP6V1E2	0.380768	0.251147
1115	ATP6V1F	0.239842	0.418118
1116	ATP6V1G1	0.360663	0.463185
1117	ATP6V1G2	0.256909	0.223477
1118	ATP6V1H	0.319024	0.348398
1119	ATP7A	-0.0879869	0.481196
1120	ATP7B	0.0986997	0.490273
1121	ATP8A1	0.040436	0.69157
1122	ATP8A2	0.4131	0.975264
1123	ATP8B1	0.0917665	0.629667
1124	ATP8B2	0.272884	0.721421
1125	ATP8B3	0.105728	0.0936024
1126	ATP8B4	0.387462	0.644211
1127	ATP9A	0.0673859	0.586262
1128	ATP9B	-0.208313	0.295676
1129	ATPAF1	0.496668	0.25517
1130	ATPAF2	0.268532	0.262879
1131	ATPSCKMT	0.28653	0.300497
1132	ATR	0.168996	0.332693
1133	ATRAID	0.410399	0.32212
1134	ATRIP	0.177383	0.304623
1135	ATRN	-0.0749171	0.418177
1136	ATRNL1	0.521949	0.330681
1137	ATRX	-0.0564795	0.442159
1138	ATXN1	0.0250845	0.492053
1139	ATXN10	-0.0757633	0.364512
1140	ATXN1L	0.295656	0.441949
1141	ATXN2	0.0371609	0.409704
1142	ATXN2L	0.392689	0.488753
1143	ATXN3	0.0380637	0.266532
1144	ATXN7	0.131218	0.380513
1145	ATXN7L1	0.0819865	0.318166
1146	ATXN7L2	0.136241	0.280031
1147	ATXN7L3	0.191062	0.340881
1148	ATXN7L3B	-0.0113037	0.400661
1149	AUH	0.100654	0.5456
1150	AUNIP	0.531853	0.195792
1151	AUP1	0.114022	0.361166
1152	AURKA	0.509085	0.46364
1153	AURKAIP1	0.406386	0.542929
1154	AURKB	0.404521	0.544412
1155	AURKC	-0.0476761	0.224547
1156	AUTS2	0.518128	0.399781
1157	AVEN	0.114606	0.318859
1158	AVIL	0.288534	0.281619
1159	AVL9	0.171281	0.42116
1160	AVPI1	0.426828	0.766804
1161	AVPR1A	0.306161	0.410434
1162	AVPR2	0.205247	0.276647
1163	AXDND1	-0.125902	0.119078
1164	AXIN1	0.271132	0.311801
1165	AXIN2	0.462054	0.526801
1166	AXL	0.569453	0.601862
1167	AZGP1	0.523317	1.48883
1168	AZI2	-0.0255763	0.329685
1169	AZIN1	-0.0476791	0.582903
1170	AZIN2	0.108784	0.253775
1171	AZU1	-0.279379	0.224853
1172	B2M	0.37537	0.800797
1173	B3GALNT1	0.132463	0.526304
1174	B3GALNT2	0.264115	0.357548
1175	B3GALT1	0.199495	0.157039
1176	B3GALT2	0.630209	0.417223
1177	B3GALT4	0.432761	0.497627
1178	B3GALT5	0.231183	0.241501
1179	B3GALT6	0.544468	0.424689
1180	B3GAT1	0.219793	0.895034
1181	B3GAT2	-0.0791877	0.0539628
1182	B3GAT3	0.346979	0.4461
1183	B3GLCT	0.0286534	0.310764
1184	B3GNT2	0.146936	0.523512
1185	B3GNT4	0.0581401	0.140937
1186	B3GNT5	0.359414	0.617872
1187	B3GNT7	0.272697	0.408335
1188	B3GNT8	0.447051	0.366784
1189	B3GNT9	0.509986	0.582443
1190	B3GNTL1	0.284489	0.255741
1191	B4GALNT1	0.511787	0.237364
1192	B4GALNT3	0.325257	0.532633
1193	B4GALNT4	0.527798	0.884508
1194	B4GALT1	0.399204	0.514649
1195	B4GALT2	0.0799792	0.352881
1196	B4GALT3	0.505833	0.304964
1197	B4GALT4	0.0353721	0.294372
1198	B4GALT5	0.376598	0.479516
1199	B4GALT6	0.0401986	0.38517
1200	B4GALT7	0.060503	0.357713
1201	B4GAT1	0.180085	0.366576
1202	B9D1	0.344664	0.274507
1203	B9D2	0.125826	0.408147
1204	BAALC	0.21588	0.181811
1205	BAAT	0.209682	0.0986781
1206	BABAM1	0.0348986	0.458663
1207	BABAM2	-0.0896095	0.330485
1208	BACE1	0.437779	0.285494
1209	BACE2	0.220419	0.886439
1210	BACH1	-0.093368	0.5558
1211	BACH2	0.527381	0.245794
1212	BAD	0.31577	0.439469
1213	BAG1	-0.117107	0.448391
1214	BAG2	0.212519	0.472981
1215	BAG3	0.402927	0.534612
1216	BAG4	0.117654	0.429275
1217	BAG5	-0.016339	0.326658
1218	BAG6	-0.00400868	0.33297
1219	BAHCC1	-0.0963125	0.40358
1220	BAHD1	0.171748	0.345996
1221	BAIAP2	0.287186	0.461208
1222	BAIAP2L1	0.353249	0.425407
1223	BAIAP2L2	0.274723	0.951724
1224	BAIAP3	0.32896	0.646614
1225	BAK1	0.0057467	0.388332
1226	BAMBI	0.224747	0.999813
1227	BANF1	0.144076	0.43253
1228	BANK1	0.249383	1.19359
1229	BANP	0.251205	0.226101
1230	BAP1	0.425013	0.277595
1231	BARD1	0.149496	0.380268
1232	BARX2	0.153895	0.729254
1233	BASP1	0.266247	0.971721
1234	BATF	0.240565	0.82404
1235	BATF2	0.300956	0.448602
1236	BATF3	0.10918	0.361415
1237	BAX	-0.023214	0.538689
1238	BAZ1A	0.0806051	0.471309
1239	BAZ1B	-0.112514	0.417018
1240	BAZ2A	0.17901	0.561201
1241	BAZ2B	0.176019	0.353575
1242	BBC3	0.171659	0.480517
1243	BBIP1	0.030081	0.246325
1244	BBOF1	-0.0936638	0.281278
1245	BBOX1	0.134392	0.393589
1246	BBS1	0.0819041	0.107485
1247	BBS10	-0.106239	0.476102
1248	BBS12	-0.000883936	0.340051
1249	BBS2	0.196871	0.41152
1250	BBS4	0.125187	0.677222
1251	BBS5	0.00710246	0.268425
1252	BBS7	0.0317102	0.342055
1253	BBS9	0.246441	0.243035
1254	BBX	0.305864	0.486886
1255	BCAM	0.488548	0.694409
1256	BCAN	0.0523153	0.160595
1257	BCAP29	0.00146593	0.168824
1258	BCAP31	0.384954	0.33846
1259	BCAR1	0.0758795	0.426875
1260	BCAR3	0.442801	0.410013
1261	BCAS1	0.532473	0.840487
1262	BCAS2	0.213079	0.344224
1263	BCAS3	0.123846	0.302965
1264	BCAS4	0.410269	0.354692
1265	BCAT1	0.163812	0.44529
1266	BCAT2	0.467391	0.508969
1267	BCCIP	0.122128	0.325532
1268	BCDIN3D	0.517518	0.215364
1269	BCHE	0.294689	0.670146
1270	BCKDHA	-0.0633874	0.13462
1271	BCKDHB	-0.0676105	0.504544
1272	BCKDK	0.134158	0.329462
1273	BCL10	-0.0154745	0.341913
1274	BCL11A	0.402851	0.349801
1275	BCL11B	0.360796	0.357704
1276	BCL2	0.596311	0.529121
1277	BCL2A1	0.182949	0.648387
1278	BCL2L1	0.259401	0.303265
1279	BCL2L10	0.341382	0.524617
1280	BCL2L11	-0.119418	0.431636
1281	BCL2L12	0.270304	0.377942
1282	BCL2L13	0.0619389	0.325045
1283	BCL2L14	-0.157538	0.459099
1284	BCL2L15	-0.035191	0.214445
1285	BCL2L2	0.176462	0.400594
1286	BCL3	0.0205931	0.865232
1287	BCL6	0.33895	0.587125
1288	BCL6B	0.319943	0.487431
1289	BCL7A	0.130337	0.411367
1290	BCL7B	0.424232	0.26268
1291	BCL7C	-0.0341984	0.414503
1292	BCL9	0.090013	0.545393
1293	BCL9L	0.235275	0.650819
1294	BCLAF1	-0.0595872	0.440065
1295	BCLAF3	-0.129692	0.361729
1296	BCO1	0.265074	0.296905
1297	BCO2	0.341912	0.156688
1298	BCOR	0.0120093	0.678889
1299	BCORL1	0.230735	0.392758
1300	BCR	-0.0571167	0.355298
1301	BCS1L	0.419653	0.339283
1302	BDH1	0.583287	0.421958
1303	BDH2	0.46852	0.494688
1304	BDKRB1	0.0657271	0.100226
1305	BDKRB2	0.389769	0.438119
1306	BDNF	0.467568	0.184688
1307	BDP1	-0.0256443	0.5369
1308	BEAN1	0.334879	0.148963
1309	BECN1	-0.0600052	0.514464
1310	BEGAIN	0.448282	0.201698
1311	BEND3	0.424322	0.507737
1312	BEND4	0.222926	0.952046
1313	BEND5	0.358704	0.411021
1314	BEND6	0.491022	0.188826
1315	BEND7	0.312434	0.343345
1316	BEST1	0.371031	0.195803
1317	BEST4	-0.0107422	0.138414
1318	BET1	0.0295325	0.280026
1319	BET1L	0.0051284	0.282513
1320	BEX1	0.474076	0.958835
1321	BEX2	0.170548	0.724521
1322	BEX3	0.330756	0.502269
1323	BEX4	0.357611	0.492315
1324	BEX5	0.320881	1.03633
1325	BFAR	0.223147	0.263862
1326	BFSP1	-0.0976827	0.205631
1327	BFSP2	0.246645	0.056672
1328	BGLAP	-0.248164	0.404126
1329	BGN	0.175898	0.944825
1330	BHLHA15	0.378248	0.954358
1331	BHLHE22	0.383171	0.150318
1332	BHLHE40	0.4804	1.09455
1333	BHLHE41	0.275677	0.831485
1334	BHMT	0.074392	0.0615673
1335	BHMT2	0.656331	0.453444
1336	BICC1	0.0375846	0.608596
1337	BICD1	0.455059	0.70164
1338	BICD2	0.459389	0.378559
1339	BICDL1	0.371559	0.470367
1340	BICDL2	-0.0676609	0.659079
1341	BICRA	0.0261793	0.380427
1342	BICRAL	-0.11012	0.459792
1343	BID	-0.0777055	0.344568
1344	BIK	0.589525	0.540414
1345	BIN1	0.404663	0.526601
1346	BIN2	0.327594	0.493092
1347	BIN3	0.395643	0.320642
1348	BIRC2	0.241159	0.43727
1349	BIRC3	0.370133	0.864791
1350	BIRC5	0.601883	0.619285
1351	BIRC6	-0.0777034	0.456131
1352	BIRC7	0.096268	0.202101
1353	BISPR	0.466	0.345058
1354	BIVM	0.0605723	0.329962
1355	BLACAT1	0.357036	0.0605156
1356	BLCAP	0.143093	0.308138
1357	BLK	0.454708	0.347138
1358	BLM	0.421985	0.230623
1359	BLMH	-0.0547617	0.370107
1360	BLNK	0.0039321	0.403215
1361	BLOC1S1	0.0831467	0.64039
1362	BLOC1S2	0.341812	0.336761
1363	BLOC1S3	0.184308	0.256519
1364	BLOC1S4	0.375201	0.303115
1365	BLOC1S5	-0.0254853	0.273964
1366	BLOC1S6	0.0532808	0.5036
1367	BLVRA	0.267691	0.442652
1368	BLVRB	0.312515	0.552753
1369	BLZF1	-0.085152	0.388613
1370	BMERB1	0.594202	0.50832
1371	BMF	-0.0726052	0.625711
1372	BMI1	-0.2061	0.409499
1373	BMP1	0.498861	0.411779
1374	BMP2	0.482576	0.502972
1375	BMP2K	0.0963391	0.251325
1376	BMP4	0.418417	0.64497
1377	BMP5	0.159235	0.845705
1378	BMP6	0.300421	0.846471
1379	BMP7	0.280017	0.843129
1380	BMP8A	0.0827461	0.373295
1381	BMP8B	0.150866	0.423716
1382	BMPER	0.431917	0.461934
1383	BMPR1A	0.316376	0.393589
1384	BMPR1B	0.341706	0.715209
1385	BMPR2	0.143987	0.528993
1386	BMS1	-0.0610813	0.315756
1387	BMS1P4	0.0226808	0.155501
1388	BMX	0.0601695	0.498966
1389	BNC1	0.381285	0.13006
1390	BNC2	0.650971	0.278081
1391	BNIP1	0.237394	0.31481
1392	BNIP2	0.431532	0.359331
1393	BNIP3	0.317091	0.445516
1394	BNIP3L	0.324842	0.503167
1395	BNIPL	0.461722	0.630451
1396	BOC	0.577645	0.559607
1397	BOD1	0.281171	0.415129
1398	BOD1L1	-0.0218272	0.501547
1399	BOK	-0.0567226	0.640342
1400	BOLA1	0.29024	0.401733
1401	BOLA2B	-0.243743	0.243508
1402	BOLA3	0.347448	0.308677
1403	BOP1	0.392117	0.597334
1404	BORA	0.0464808	0.236207
1405	BORCS5	0.100488	0.242818
1406	BORCS6	0.033005	0.481003
1407	BORCS7	0.164964	0.426108
1408	BORCS8	-0.321102	0.375688
1409	BPGM	-0.313292	0.382203
1410	BPHL	0.345893	0.347717
1411	BPI	0.392745	0.117537
1412	BPNT1	0.13035	0.396776
1413	BPNT2	-0.0619864	0.456483
1414	BPTF	-0.0486826	0.493329
1415	BRAF	0.126851	0.324442
1416	BRAP	0.133903	0.22323
1417	BRAT1	0.030708	0.435322
1418	BRCA1	0.441927	0.302236
1419	BRCA2	0.360904	0.179402
1420	BRCC3	0.252297	0.38028
1421	BRD1	-0.0938225	0.403067
1422	BRD2	0.0764871	0.473041
1423	BRD3	-0.0362435	0.556365
1424	BRD3OS	0.126735	0.309302
1425	BRD4	0.235119	0.342079
1426	BRD7	-0.0398601	0.288528
1427	BRD8	0.128253	0.435438
1428	BRD9	0.21238	0.324367
1429	BRF1	0.181336	0.236711
1430	BRF2	-0.0473276	0.378558
1431	BRI3	0.26189	0.432317
1432	BRI3BP	0.251041	0.420896
1433	BRICD5	0.25808	0.435625
1434	BRINP1	0.0811531	0.622537
1435	BRINP2	0.265698	0.0400743
1436	BRIP1	0.429524	0.204968
1437	BRIX1	0.498049	0.296626
1438	BRK1	0.497067	0.311253
1439	BRMS1	-0.110689	0.489063
1440	BRMS1L	-0.108072	0.291776
1441	BROX	-0.0543823	0.429208
1442	BRPF1	0.138993	0.310067
1443	BRPF3	0.108383	0.542593
1444	BRSK1	-0.113586	0.621037
1445	BRSK2	0.4498	0.761825
1446	BRWD1	0.0688252	0.370699
1447	BRWD3	0.252144	0.315845
1448	BSCL2	-0.0259024	0.187037
1449	BSDC1	0.190893	0.302275
1450	BSG	0.236122	0.421629
1451	BSN	0.449291	0.127615
1452	BSPRY	0.464083	0.381417
1453	BST1	0.522497	0.241928
1454	BST2	0.461655	1.08614
1455	BTAF1	0.0989807	0.586829
1456	BTBD1	0.0192983	0.345359
1457	BTBD10	-0.252532	0.311671
1458	BTBD16	0.148432	0.226017
1459	BTBD18	-0.02068	0.044303
1460	BTBD19	0.455667	0.324861
1461	BTBD2	0.0815159	0.335577
1462	BTBD3	0.460545	0.378888
1463	BTBD6	0.401042	0.317665
1464	BTBD7	0.165602	0.335706
1465	BTBD8	0.0881628	0.292458
1466	BTBD9	0.0794356	0.32968
1467	BTC	-0.125213	0.389858
1468	BTD	0.351102	0.391618
1469	BTF3	0.199519	0.459452
1470	BTF3L4	0.183089	0.291378
1471	BTG1	0.283927	0.458361
1472	BTG2	0.300723	1.13685
1473	BTG3	0.335498	0.575562
1474	BTK	0.377795	0.385858
1475	BTLA	0.381013	0.288314
1476	BTN2A1	0.46049	0.446862
1477	BTN2A2	0.464725	0.404862
1478	BTN3A1	0.354804	0.567875
1479	BTN3A2	0.36636	0.654934
1480	BTN3A3	0.331416	0.526265
1481	BTNL8	-0.0530447	0.030851
1482	BTNL9	0.280275	0.381884
1483	BTRC	0.0800563	0.390169
1484	BUB1	0.556232	0.436653
1485	BUB1B	0.448878	0.432159
1486	BUB3	0.246819	0.345444
1487	BUD13	0.257687	0.297109
1488	BUD23	0.120878	0.339907
1489	BUD31	0.11812	0.327504
1490	BYSL	0.355438	0.370083
1491	BZW1	0.0242569	0.432017
1492	BZW2	0.463461	0.552815
1493	C10orf143	-0.0831485	0.205245
1494	C10orf55	0.163649	0.0737109
1495	C10orf67	-0.196179	0.0464903
1496	C10orf88	-0.0514017	0.264431
1497	C11orf16	0.12284	0.161101
1498	C11orf21	0.268318	0.238627
1499	C11orf24	-0.236887	0.365365
1500	C11orf42		0.365365
1501	C11orf54	0.339127	0.401002
1502	C11orf58	-0.140973	0.26343
1503	C11orf65	0.0887513	0.104069
1504	C11orf68	-0.219904	0.379545
1505	C11orf71	0.0709511	0.548304
1506	C11orf91	0.404977	0.0743281
1507	C11orf96	0.34347	1.13178
1508	C12orf42	0.352927	0.0584983
1509	C12orf43	-0.0370305	0.164681
1510	C12orf56	-0.249949	0.505394
1511	C12orf57	0.324226	0.692397
1512	C12orf60	0.383188	0.465489
1513	C12orf71		0.465489
1514	C12orf75	0.596576	0.634921
1515	C12orf76	0.100699	0.267321
1516	C13orf46	0.226939	0.560383
1517	C14orf119	0.265661	0.240617
1518	C14orf132	0.414443	0.530047
1519	C14orf28	0.224609	0.241129
1520	C14orf93	0.205967	0.269228
1521	C15orf39	0.405113	0.465257
1522	C15orf40	0.0426445	0.178011
1523	C15orf48	0.158988	1.60421
1524	C15orf61	0.488742	0.234967
1525	C15orf62	0.230221	0.246107
1526	C16orf54	0.388224	0.584726
1527	C16orf74	0.376091	0.421713
1528	C16orf86	0.344861	0.374602
1529	C16orf87	0.109258	0.288144
1530	C16orf89	0.414303	0.650549
1531	C16orf95	0.124573	0.149393
1532	C16orf96	-0.119045	0.135175
1533	C17orf100	0.191957	0.317446
1534	C17orf107	0.0618081	0.306647
1535	C17orf113	-0.136146	0.342603
1536	C17orf58	0.218298	0.535557
1537	C17orf67	0.161988	0.282071
1538	C17orf75	-0.00324996	0.251405
1539	C17orf78	0.0279178	0.099141
1540	C17orf99	0.35797	0.0714674
1541	C18orf21	-0.0247677	0.360438
1542	C18orf32	0.00324334	0.200666
1543	C18orf54	0.366312	0.167825
1544	C19orf12	0.338329	0.214681
1545	C19orf18	-0.0106996	0.646778
1546	C19orf25	-0.173727	0.396812
1547	C19orf38	0.274094	0.334309
1548	C19orf44	-0.0453254	0.226851
1549	C19orf47	-0.0350109	0.220472
1550	C19orf53	0.189514	0.447928
1551	C19orf67	-0.0990492	0.096256
1552	C19orf73	0.143045	0.52318
1553	C19orf81	0.109737	0.949277
1554	C19orf84	-0.00488723	0.0425385
1555	C1D	0.282968	0.343501
1556	C1GALT1	0.133213	0.340329
1557	C1GALT1C1	0.373157	0.412044
1558	C1GALT1C1L	0.243583	0.373474
1559	C1QA	0.287036	0.8692
1560	C1QB	0.25082	0.862564
1561	C1QBP	0.481688	0.448512
1562	C1QC	0.254021	0.825948
1563	C1QL1	0.259993	0.388938
1564	C1QL3	-0.344272	0.428078
1565	C1QL4	0.207775	0.0846023
1566	C1QTNF1	0.555006	0.648442
1567	C1QTNF12	-0.0261571	0.265744
1568	C1QTNF2	0.191956	0.424795
1569	C1QTNF3	0.220957	0.959399
1570	C1QTNF4	0.228759	0.29604
1571	C1QTNF6	0.0746657	0.411349
1572	C1QTNF7	0.426776	0.52713
1573	C1R	0.412435	0.895422
1574	C1RL	0.246568	0.704427
1575	C1S	0.509384	0.864521
1576	C1orf115	0.365362	0.7533
1577	C1orf116	0.207505	0.543416
1578	C1orf122	0.404739	0.524977
1579	C1orf127	0.0745619	0.109685
1580	C1orf131	0.173434	0.298527
1581	C1orf146	0.0611403	0.0691673
1582	C1orf159	0.146964	0.401285
1583	C1orf162	0.22046	0.422446
1584	C1orf174	0.00586667	0.308021
1585	C1orf198	0.312533	0.364249
1586	C1orf21	0.120487	0.51549
1587	C1orf210	0.270561	0.401051
1588	C1orf216	0.092422	0.38064
1589	C1orf220	-0.0245764	0.173789
1590	C1orf226	0.0213963	0.503535
1591	C1orf35	0.282442	0.385202
1592	C1orf43	0.250277	0.341248
1593	C1orf50	0.0111293	0.23763
1594	C1orf52	0.262694	0.272536
1595	C1orf53	0.343037	0.515651
1596	C1orf54	0.527417	0.560502
1597	C1orf56	0.501883	0.341088
1598	C1orf74	0.178235	0.366556
1599	C2	0.196441	0.627911
1600	C20orf144	0.265099	0.241971
1601	C20orf202	0.0883597	0.0691218
1602	C20orf204	0.302603	0.184741
1603	C20orf96	0.160957	0.577332
1604	C21orf58	0.447857	0.349666
1605	C21orf91	0.404065	0.324316
1606	C22orf15	-0.01223	0.15462
1607	C22orf23	-0.0971758	0.382469
1608	C22orf31	0.187974	0.163006
1609	C22orf39	0.15372	0.267771
1610	C2CD2	0.226431	0.378059
1611	C2CD2L	0.0429339	0.359617
1612	C2CD3	0.0980212	0.334852
1613	C2CD4A	0.23556	0.689377
1614	C2CD4B	0.0554237	0.750241
1615	C2CD4C	-0.101636	0.532512
1616	C2CD4D	0.367466	0.424367
1617	C2CD5	-0.0907049	0.42155
1618	C2CD6	0.240548	0.095931
1619	C2orf15	0.462401	0.317001
1620	C2orf42	-0.0105147	0.216943
1621	C2orf49	0.0627583	0.374913
1622	C2orf66	0.17779	0.156293
1623	C2orf68	-0.123588	0.276443
1624	C2orf69	-0.0282583	0.43682
1625	C2orf72	0.245064	1.18785
1626	C2orf74	-0.0702907	0.174792
1627	C2orf76	0.184836	0.336308
1628	C2orf81	0.00764265	0.182983
1629	C2orf88	0.624741	0.385416
1630	C2orf92	0.281697	0.267012
1631	C3	0.274278	1.30677
1632	C3AR1	0.194445	0.537253
1633	C3orf18	0.425951	0.389915
1634	C3orf20	0.152257	0.0636023
1635	C3orf33	0.0196206	0.247212
1636	C3orf38	-0.0954962	0.332404
1637	C3orf49	-0.0752572	0.0474359
1638	C3orf52	0.141556	0.404211
1639	C3orf62	0.272057	0.294165
1640	C3orf70	0.683243	0.454341
1641	C3orf80	0.00988764	0.347291
1642	C4A	0.216105	1.00804
1643	C4B	0.197352	1.04423
1644	C4BPA	0.0294601	0.212949
1645	C4BPB	-0.0325763	0.0550684
1646	C4orf19	0.300637	0.554014
1647	C4orf3	0.316646	0.436239
1648	C4orf33	0.401152	0.290283
1649	C4orf46	0.177825	0.330426
1650	C4orf50	0.267928	0.0992683
1651	C5	-0.0490851	0.551564
1652	C5AR1	0.147581	0.661761
1653	C5AR2	0.0629798	0.120812
1654	C5orf15	-0.0234097	0.531322
1655	C5orf22	0.0114975	0.405451
1656	C5orf24	-0.1443	0.541631
1657	C5orf34	0.320592	0.216129
1658	C5orf58	0.00845295	0.068262
1659	C5orf63	0.247411	0.257522
1660	C6	0.192928	0.371934
1661	C6orf120	-0.059767	0.491508
1662	C6orf132	0.134199	0.480377
1663	C6orf136	0.163445	0.320591
1664	C6orf141	0.12678	0.3435
1665	C6orf163	-0.0188581	0.236005
1666	C6orf226	0.236164	0.581199
1667	C6orf47	0.123365	0.265709
1668	C6orf52	0.189297	0.501414
1669	C6orf58	0.0110735	0.095302
1670	C6orf62	0.296381	0.419413
1671	C6orf89	0.24912	0.269838
1672	C7	0.56449	0.998222
1673	C7orf25	0.0201664	0.0887896
1674	C7orf50	-0.0122341	0.466524
1675	C7orf57	-0.0194459	0.251245
1676	C8G	0.151383	0.309954
1677	C8orf33	0.251499	0.386463
1678	C8orf48	0.130865	0.10959
1679	C8orf58	0.0928007	0.351897
1680	C8orf76	-0.00182566	0.322297
1681	C8orf82	0.116784	0.59475
1682	C8orf88	0.750922	0.409041
1683	C9orf152	0.19131	0.638948
1684	C9orf153	0.168463	0.082612
1685	C9orf163	0.607352	0.22149
1686	C9orf40	0.364633	0.314163
1687	C9orf43	0.469568	0.19238
1688	C9orf50	0.254041	0.0834275
1689	C9orf72	-0.103711	0.485247
1690	C9orf78	0.23155	0.28592
1691	C9orf85	0.242105	0.290012
1692	CA11	0.600616	0.620283
1693	CA12	0.280771	0.577078
1694	CA13	0.22205	0.555837
1695	CA14	0.477508	0.452185
1696	CA2	0.250368	0.66361
1697	CA3	-0.11762	1.23963
1698	CA4	0.131846	0.416228
1699	CA5B	-0.066153	0.452809
1700	CA8	0.229564	0.522321
1701	CA9	-0.152374	0.199096
1702	CAAP1	0.0388754	0.379762
1703	CAB39	-0.0193518	0.464344
1704	CAB39L	-0.0370428	0.627383
1705	CABCOCO1	-0.0203045	0.778155
1706	CABIN1	-0.0526961	0.325071
1707	CABLES1	0.415171	0.338019
1708	CABLES2	0.37037	0.305959
1709	CABP1	0.478022	0.158116
1710	CABP4	0.550495	0.406601
1711	CABP7	-0.150917	0.0901734
1712	CABYR	0.317173	0.173078
1713	CACFD1	0.410822	0.457623
1714	CACHD1	0.604049	0.48112
1715	CACNA1A	0.119311	0.0783177
1716	CACNA1C	0.486175	0.391371
1717	CACNA1D	0.50516	1.05498
1718	CACNA1E	-0.0242336	0.0197954
1719	CACNA1F	0.343807	0.0464702
1720	CACNA1G	0.267326	0.469662
1721	CACNA1H	0.369939	0.846111
1722	CACNA1I	0.311249	0.203862
1723	CACNA1S	-0.0615537	0.192582
1724	CACNA2D1	0.420872	0.762247
1725	CACNA2D2	0.236509	0.426214
1726	CACNA2D3	0.510163	0.296613
1727	CACNA2D4	0.359373	0.116438
1728	CACNB1	0.453169	0.343673
1729	CACNB2	0.326216	0.269767
1730	CACNB3	0.29747	0.432055
1731	CACNB4	0.359311	0.198406
1732	CACNG4	0.569499	1.09717
1733	CACNG8	-0.164525	0.0593942
1734	CACTIN	-0.115255	0.350937
1735	CACUL1	-0.0659709	0.300482
1736	CACYBP	0.0431333	0.335874
1737	CAD	0.269382	0.46588
1738	CADM1	-0.0227796	0.692717
1739	CADM2	0.2023	0.60692
1740	CADM3	0.389441	0.361166
1741	CADM4	0.530992	0.435599
1742	CADPS	0.306375	0.861191
1743	CADPS2	0.0173655	0.533766
1744	CAGE1	-0.00162757	0.0459263
1745	CAHM	0.0853873	0.396027
1746	CALB1	-0.138181	0.0532464
1747	CALB2	0.0337343	0.195705
1748	CALCB	0.108088	0.102328
1749	CALCOCO1	0.287458	0.410049
1750	CALCOCO2	0.134347	0.281613
1751	CALCR	0.164603	0.0277154
1752	CALCRL	0.327178	0.636574
1753	CALD1	0.631449	0.680321
1754	CALHM2	0.629656	0.419261
1755	CALHM5	0.415851	0.224406
1756	CALHM6	0.197821	0.343653
1757	CALM1	0.549155	0.430725
1758	CALM2	-0.0597961	0.342286
1759	CALM3	0.022818	0.305264
1760	CALML4	-0.0569843	0.0417138
1761	CALML6	-0.0384536	0.309685
1762	CALN1	-0.0398887	0.289039
1763	CALR	0.477812	0.49464
1764	CALU	-0.0981337	0.507809
1765	CALY	0.157989	0.153879
1766	CAMK1	0.358177	0.404353
1767	CAMK1D	0.477002	0.515465
1768	CAMK1G	0.476859	0.313058
1769	CAMK2A	0.341334	0.225166
1770	CAMK2B	0.524048	0.631786
1771	CAMK2D	-0.00261502	0.547165
1772	CAMK2G	0.543428	0.375756
1773	CAMK2N1	0.172488	1.06606
1774	CAMK2N2	0.35727	0.559183
1775	CAMK4	0.242168	0.415119
1776	CAMKK1	-0.361683	0.460267
1777	CAMKK2	0.332937	0.831701
1778	CAMKMT	0.0297316	0.233548
1779	CAMLG	-0.0121839	0.294105
1780	CAMP	0.133752	0.290796
1781	CAMSAP1	-0.0936128	0.425795
1782	CAMSAP2	0.345328	0.361391
1783	CAMSAP3	0.524626	0.450515
1784	CAMTA1	-0.0283622	0.227941
1785	CAMTA2	0.206344	0.387119
1786	CAND1	-0.0481024	0.452277
1787	CAND2	0.640362	0.34063
1788	CANT1	0.411019	0.516118
1789	CANX	0.171949	0.518616
1790	CAP1	0.343534	0.353133
1791	CAP2	0.474105	0.637878
1792	CAPG	0.394531	0.861147
1793	CAPN1	0.216919	0.411019
1794	CAPN10	0.073289	0.363918
1795	CAPN11	0.178912	0.11049
1796	CAPN12	0.124626	0.209714
1797	CAPN13	0.252917	0.569108
1798	CAPN14	-0.143362	0.122566
1799	CAPN15	0.496818	0.44212
1800	CAPN2	0.216604	0.617961
1801	CAPN3	0.152154	0.180208
1802	CAPN5	0.00194501	0.866355
1803	CAPN6	0.560615	0.73793
1804	CAPN7	-0.0178474	0.398144
1805	CAPN8	0.338758	0.436312
1806	CAPN9	-0.13211	0.580896
1807	CAPNS1	0.168507	0.3777
1808	CAPRIN1	0.0853403	0.463233
1809	CAPRIN2	0.142902	0.344072
1810	CAPS	0.012478	0.827691
1811	CAPS2	0.191517	0.247711
1812	CAPZA1	0.0916338	0.367563
1813	CAPZA2	0.0653165	0.412917
1814	CAPZB	0.453133	0.295512
1815	CARD10	-0.101224	0.503911
1816	CARD11	0.379115	0.477235
1817	CARD14	0.0608745	0.297381
1818	CARD16	0.344339	0.48895
1819	CARD19	0.00505877	0.349084
1820	CARD6	0.410779	0.31282
1821	CARD8	0.267709	0.273965
1822	CARD9	0.262837	0.296121
1823	CARF	0.255526	0.264059
1824	CARHSP1	-0.090929	0.42792
1825	CARM1	0.0410085	0.443265
1826	CARMIL1	0.0858298	0.500401
1827	CARMIL2	0.261996	0.370211
1828	CARMIL3	0.344678	0.155983
1829	CARNMT1	0.102208	0.365934
1830	CARNS1	0.135252	0.215076
1831	CARS1	-0.0667462	0.284087
1832	CARS2	-0.0210786	0.374578
1833	CASC11	0.348863	0.209143
1834	CASC18	0.298164	0.0714583
1835	CASC2	0.10945	0.127652
1836	CASC3	-0.0569991	0.330353
1837	CASC8	0.364142	0.335382
1838	CASC9	0.0531422	0.231959
1839	CASD1	-0.169444	0.518688
1840	CASK	-0.13593	0.297581
1841	CASKIN1	0.602275	0.340519
1842	CASKIN2	0.474268	0.32502
1843	CASP1	0.415094	0.576498
1844	CASP10	0.327728	0.427329
1845	CASP2	0.0703124	0.555296
1846	CASP3	0.263971	0.400521
1847	CASP4	0.390375	0.487555
1848	CASP5	0.186298	0.0594688
1849	CASP6	0.106543	0.399099
1850	CASP7	0.289642	0.544788
1851	CASP8	0.0624871	0.474929
1852	CASP8AP2	0.311726	0.454793
1853	CASP9	0.0840015	0.30824
1854	CASQ1	0.584852	0.70661
1855	CASQ2	0.480562	0.725437
1856	CASR	-0.00904283	0.0358296
1857	CASS4	0.2232	0.23657
1858	CAST	0.204874	0.434745
1859	CASTOR1	0.271946	0.122381
1860	CASTOR2	0.0926894	0.401416
1861	CASZ1	-0.0168509	0.536392
1862	CAT	0.0844855	0.568254
1863	CATIP	0.146332	0.281717
1864	CATSPER1	-0.0786273	0.0847735
1865	CATSPER2	0.157135	0.317501
1866	CATSPER3	0.115769	0.188062
1867	CATSPERB	0.146711	0.286484
1868	CATSPERE	0.0893623	0.128176
1869	CATSPERG	0.0363476	0.191901
1870	CAV1	0.69539	0.717996
1871	CAV2	0.695207	0.511353
1872	CAVIN1	0.679249	0.706276
1873	CAVIN2	0.542678	0.74233
1874	CAVIN3	0.478862	0.614535
1875	CAVIN4	-0.0357154	0.412085
1876	CBARP	0.0556215	0.236995
1877	CBFA2T2	-0.120204	0.560748
1878	CBFA2T3	-0.147398	0.521
1879	CBFB	0.116134	0.464877
1880	CBL	0.478286	0.36443
1881	CBLB	0.204792	0.322407
1882	CBLC	0.183103	0.917063
1883	CBLL1	0.100009	0.57015
1884	CBLN1	0.0423404	0.253161
1885	CBLN3	0.105355	0.437311
1886	CBLN4	0.0600935	0.101261
1887	CBR1	0.490752	0.500486
1888	CBR3	-0.0318984	0.832992
1889	CBR4	0.399276	0.50495
1890	CBS	0.153024	0.493666
1891	CBX1	-0.10171	0.407422
1892	CBX2	0.478801	0.526709
1893	CBX3	0.416787	0.413632
1894	CBX4	0.199389	0.505211
1895	CBX5	0.0719633	0.421319
1896	CBX6	0.0479445	0.537398
1897	CBX7	0.574676	0.442179
1898	CBX8	0.616272	0.356196
1899	CBY1	0.25888	0.372278
1900	CBY3	0.17496	0.1283
1901	CC2D1A	-0.324121	0.378546
1902	CC2D1B	-0.104364	0.236612
1903	CC2D2A	0.0735445	0.37774
1904	CC2D2B	0.240461	0.0942772
1905	CCAR1	0.217633	0.381122
1906	CCAR2	0.133813	0.367911
1907	CCBE1	0.459208	0.327843
1908	CCDC102A	0.226015	0.465656
1909	CCDC102B	-0.0314897	0.244281
1910	CCDC106	0.274206	0.413597
1911	CCDC107	0.298113	0.444259
1912	CCDC110	0.282267	0.427535
1913	CCDC112	-0.0400238	0.42656
1914	CCDC115	0.209135	0.353152
1915	CCDC116	-0.0366078	0.106048
1916	CCDC117	-0.0949333	0.438054
1917	CCDC12	-0.132104	0.397536
1918	CCDC120	0.166711	0.341318
1919	CCDC121	-0.101992	0.343096
1920	CCDC122	0.10208	0.343974
1921	CCDC124	0.0430788	0.518888
1922	CCDC125	0.239898	0.472581
1923	CCDC126	-0.06469	0.359624
1924	CCDC127	0.01328	0.195582
1925	CCDC13	0.0292519	0.059373
1926	CCDC134	-0.158649	0.402494
1927	CCDC136	0.385674	0.484518
1928	CCDC137	-0.0325836	0.399674
1929	CCDC138	0.378267	0.333805
1930	CCDC14	0.353083	0.469871
1931	CCDC141	-0.00554164	0.402361
1932	CCDC142	0.329071	0.341329
1933	CCDC144A	-0.0857642	0.258486
1934	CCDC146	0.138156	0.455887
1935	CCDC148	0.126087	0.141345
1936	CCDC149	0.207652	0.369002
1937	CCDC15	0.0990752	0.338088
1938	CCDC150	0.127338	0.0946413
1939	CCDC152	0.162303	0.191928
1940	CCDC154	-0.0185278	0.753475
1941	CCDC157	0.211445	0.208339
1942	CCDC158	0.181475	0.158308
1943	CCDC159	0.313091	0.528639
1944	CCDC163	0.229072	0.474176
1945	CCDC167	0.300156	0.526575
1946	CCDC168	0.200804	0.0383881
1947	CCDC17	0.0313159	0.435961
1948	CCDC170	-0.0930151	0.358332
1949	CCDC171	0.0270718	0.131127
1950	CCDC174	0.0914441	0.213938
1951	CCDC18	0.380931	0.163128
1952	CCDC180	0.369699	0.116697
1953	CCDC181	0.458951	0.16629
1954	CCDC183	-0.10963	0.342884
1955	CCDC184	0.111774	0.352941
1956	CCDC186	-0.119188	0.67432
1957	CCDC187	-0.07396	0.28179
1958	CCDC188	-0.00439195	0.275713
1959	CCDC191	-0.00643114	0.306636
1960	CCDC192	0.133665	0.0989139
1961	CCDC194	0.286017	0.241987
1962	CCDC196	-0.0740338	0.0331937
1963	CCDC200	0.083785	0.150323
1964	CCDC22	0.463486	0.309546
1965	CCDC24	0.127554	0.508699
1966	CCDC25	0.0120136	0.393605
1967	CCDC26	-0.0976228	0.0880497
1968	CCDC28A	0.398215	0.414045
1969	CCDC28B	0.165576	0.384265
1970	CCDC3	0.400038	0.72608
1971	CCDC30	-0.0599981	0.123326
1972	CCDC32	-0.170799	0.286346
1973	CCDC34	0.502248	0.340079
1974	CCDC38	-0.0558543	0.0294972
1975	CCDC39	0.0788013	0.0432146
1976	CCDC40	0.419529	0.383707
1977	CCDC43	0.283344	0.278889
1978	CCDC47	0.132223	0.41751
1979	CCDC50	0.0943367	0.479864
1980	CCDC51	0.351872	0.330866
1981	CCDC57	-0.0260745	0.4925
1982	CCDC59	0.0830133	0.270344
1983	CCDC6	0.248081	0.569778
1984	CCDC61	0.0401764	0.463263
1985	CCDC62	0.0306058	0.0731331
1986	CCDC65	-0.080604	0.313298
1987	CCDC66	0.0540858	0.306383
1988	CCDC68	0.396759	0.454265
1989	CCDC69	0.673062	0.574306
1990	CCDC7	0.148998	0.161583
1991	CCDC71	-0.014195	0.316019
1992	CCDC71L	0.330557	0.422058
1993	CCDC73	0.0416838	0.0495079
1994	CCDC74A	0.231905	0.805094
1995	CCDC74B	0.410194	0.654891
1996	CCDC77	0.170049	0.271842
1997	CCDC78	0.435992	0.695079
1998	CCDC8	0.636973	0.56876
[truncated: 14,060 more rows]

## Sheet: no attention
	gene	pcc	rmse
0	A1BG	0.0247636	0.0498024
1	A2M	0.382461	0.916046
2	A2ML1	0.2708	0.353679
3	A4GALT	0.554651	0.578503
4	AAAS	0.0130615	0.478923
5	AACS	0.16835	0.433572
6	AADAT	-0.00244093	0.829244
7	AAGAB	-0.0581047	0.492825
8	AAK1	-0.161574	0.52277
9	AAMDC	0.0928217	0.40262
10	AAMP	0.0116931	0.580307
11	AANAT	-0.0799607	0.0530465
12	AAR2	0.0966608	0.429966
13	AARD	0.26275	0.273134
14	AARS1	-0.0372606	0.576366
15	AARS2	-0.0789438	0.467027
16	AARSD1	-0.0382725	0.239254
17	AASDH	-0.0593015	0.46772
18	AASDHPPT	0.0373749	0.381339
19	AASS	0.0178903	0.495366
20	AATBC	0.167827	0.379945
21	AATF	0.00263682	0.486724
22	AATK	0.252614	0.472998
23	ABAT	0.366001	0.782506
24	ABCA1	0.07616	0.598507
25	ABCA10	0.267006	0.174775
26	ABCA12	-0.25554	0.189469
27	ABCA13	0.0866064	0.121717
28	ABCA2	0.272844	0.565379
29	ABCA3	0.0910741	0.600702
30	ABCA4	0.274103	0.0998112
31	ABCA5	-0.222168	0.462215
32	ABCA6	0.393272	0.181711
33	ABCA7	0.0769272	0.557447
34	ABCA8	0.414317	0.50265
35	ABCA9	0.377443	0.187645
36	ABCB1	0.41873	0.53978
37	ABCB10	-0.0040216	0.462313
38	ABCB11	-0.212645	0.0852693
39	ABCB4	0.342138	0.110935
40	ABCB5	0.0199663	0.227243
41	ABCB6	0.196964	0.141677
42	ABCB7	0.125014	0.32645
43	ABCB8	-0.0485688	0.45931
44	ABCB9	0.00320595	0.15374
45	ABCC1	-0.153223	0.60383
46	ABCC10	-0.184112	0.412513
47	ABCC11	0.11164	1.0143
48	ABCC2	0.332043	0.100579
49	ABCC3	0.389926	0.647918
50	ABCC4	0.138816	1.18293
51	ABCC5	0.391443	0.573191
52	ABCC6	0.321229	0.459263
53	ABCC8	0.0901817	0.448821
54	ABCC9	0.576168	0.450093
55	ABCD1	0.288449	0.45659
56	ABCD2	0.423657	0.123414
57	ABCD3	0.0655256	0.46546
58	ABCD4	-0.050226	0.396276
59	ABCE1	0.144349	0.561093
60	ABCF1	0.0156051	0.509639
61	ABCF2	-0.104516	0.38722
62	ABCF3	-0.0591523	0.508227
63	ABCG1	0.0824622	0.61475
64	ABCG2	0.486914	0.525395
65	ABCG4	0.1361	0.0823885
66	ABCG5		0.0823885
67	ABCG8	0.0500901	0.0379624
68	ABHD1	0.199632	0.432003
69	ABHD10	-0.0993496	0.54405
70	ABHD11	-0.153451	0.815312
71	ABHD12	-0.0134697	0.748826
72	ABHD12B	-0.154531	0.0495433
73	ABHD13	0.160241	0.407323
74	ABHD14A	0.101137	0.607611
75	ABHD14B	-0.0379185	0.67637
76	ABHD15	0.148385	0.430268
77	ABHD16A	-0.0310956	0.188508
78	ABHD17A	0.0426598	0.502497
79	ABHD17B	0.0409448	0.59243
80	ABHD17C	0.22183	0.696674
81	ABHD18	-0.116356	0.358942
82	ABHD2	0.0471062	1.10584
83	ABHD3	0.16116	0.505012
84	ABHD4	0.0949178	0.495689
85	ABHD5	-0.0145414	0.348786
86	ABHD6	0.448755	0.313044
87	ABHD8	0.113746	0.487332
88	ABI1	-0.0180486	0.451751
89	ABI2	-0.0611263	0.369963
90	ABI3	0.336756	0.543702
91	ABI3BP	0.485406	0.531099
92	ABITRAM	0.054932	0.425778
93	ABL1	0.198047	0.523087
94	ABL2	0.0937232	0.313107
95	ABLIM1	0.181372	0.753221
96	ABLIM2	0.285148	0.327937
97	ABLIM3	0.101903	0.539307
98	ABO	0.401206	0.720063
99	ABR	0.310395	0.463995
100	ABRACL	0.0364199	0.709737
101	ABRAXAS1	0.0235236	0.237759
102	ABRAXAS2	-0.00765417	0.491557
103	ABT1	-0.188113	0.532977
104	ABTB1	0.335376	0.509493
105	ABTB2	0.218208	0.566187
106	ACAA1	0.180501	0.559999
107	ACAA2	0.24598	0.575969
108	ACACA	0.215955	0.766025
109	ACACB	0.546319	0.430454
110	ACAD10	-0.183125	0.50597
111	ACAD11	0.0668674	0.0887822
112	ACAD8	0.109254	0.930172
113	ACAD9	-0.0720257	0.477144
114	ACADL	0.392383	0.949722
115	ACADM	-0.0111341	0.569225
116	ACADS	0.209607	0.572751
117	ACADSB	-0.0582293	0.78716
118	ACADVL	0.09508	0.784227
119	ACAN	0.1311	0.375601
120	ACAP1	0.456871	0.508828
121	ACAP2	0.0880598	0.424466
122	ACAP3	0.361016	0.594763
123	ACAT1	0.24068	0.59829
124	ACAT2	0.316544	0.665495
125	ACBD3	-0.0851801	0.586669
126	ACBD4	-0.041939	0.531997
127	ACBD5	0.250673	0.449844
128	ACBD6	0.0823696	0.374032
129	ACBD7	0.129329	0.335049
130	ACCS	-0.0928744	0.680246
131	ACD	-0.0886999	0.512764
132	ACE	0.198141	0.542174
133	ACE2	-0.0399469	0.0943558
134	ACER2	0.0673554	0.743873
135	ACER3	-0.115382	0.823365
136	ACHE	0.202357	0.73579
137	ACIN1	0.00761045	0.631734
138	ACKR1	0.310919	1.04073
139	ACKR2	-0.066729	0.310595
140	ACKR3	0.522179	0.661289
141	ACKR4	0.0640377	0.0762055
142	ACLY	0.118592	0.847731
143	ACMSD	-0.0121322	0.058152
144	ACO1	0.310786	0.443845
145	ACO2	-0.256782	0.56571
146	ACOT1	0.193475	0.506043
147	ACOT11	0.448292	0.307797
148	ACOT13	0.147965	0.327454
149	ACOT2	0.215723	0.460185
150	ACOT4	-0.0564128	0.356461
151	ACOT7	-0.018077	0.429644
152	ACOT8	-0.0093565	0.439725
153	ACOT9	0.182861	0.340407
154	ACOX1	0.0307963	0.499783
155	ACOX2	0.41088	0.606243
156	ACOX3	0.153235	0.583672
157	ACOXL	0.366878	0.449117
158	ACP1	-0.100555	0.558793
159	ACP2	0.366118	0.589908
160	ACP3	0.32125	1.57645
161	ACP4	-0.00819882	0.365032
162	ACP5	0.297962	1.12423
163	ACP6	-0.0047876	0.45981
164	ACP7	0.252718	0.130301
165	ACR	0.0987452	0.0977412
166	ACRBP	0.224923	0.335376
167	ACRV1	0.54405	0.286735
168	ACSBG1	0.0211914	0.234533
169	ACSBG2	0.174937	0.0746096
170	ACSF2	0.515705	0.800779
171	ACSF3	-0.0356768	0.338319
172	ACSL1	0.218553	0.914587
173	ACSL3	-0.045515	0.920361
174	ACSL4	0.560615	0.538849
175	ACSL5	0.0974571	1.13174
176	ACSL6	0.169714	0.0694431
177	ACSM1	0.184474	1.7873
178	ACSM3	0.264468	0.871474
179	ACSM4	0.351538	0.0504101
180	ACSM5	0.0510326	0.113579
181	ACSS1	-0.0257236	0.593303
182	ACSS2	0.360914	0.36643
183	ACSS3	0.584293	0.319272
184	ACTA1	0.409475	1.49903
185	ACTA2	0.675288	0.931995
186	ACTB	0.464139	1.01296
187	ACTC1	0.6294	1.18909
188	ACTG1	-0.0544192	1.20867
189	ACTG2	0.701459	1.18539
190	ACTL6A	-0.0139969	0.552876
191	ACTN1	0.513507	0.608586
192	ACTN2	0.324701	0.90387
193	ACTN3	-0.0332155	0.0690796
194	ACTN4	0.410724	0.58345
195	ACTR10	0.146486	0.383053
196	ACTR1A	0.0065897	0.502216
197	ACTR1B	-0.008198	0.54225
198	ACTR2	0.0685159	0.769125
199	ACTR3	0.31842	0.421767
200	ACTR3B	0.246728	0.325111
201	ACTR3C	-0.0132181	0.180972
202	ACTR5	0.135201	0.373932
203	ACTR6	-0.199765	0.427511
204	ACTR8	0.264736	0.41058
205	ACTRT3	0.130018	0.270722
206	ACVR1	0.189174	0.472383
207	ACVR1B	0.13492	0.497134
208	ACVR1C	0.0268088	0.0982209
209	ACVR2A	0.0938691	0.402663
210	ACVR2B	0.209608	0.291283
211	ACVRL1	0.435839	0.458557
212	ACY1	-0.0373492	0.136528
213	ACY3	0.119996	0.80204
214	ACYP1	0.125617	0.524571
215	ACYP2	0.0295434	0.307414
216	ADA	0.455959	0.337594
217	ADA2	0.509242	0.613147
218	ADAD2	0.0502824	0.119898
219	ADAM10	0.011348	0.583717
220	ADAM11	0.24708	0.295354
221	ADAM12	0.0947543	0.235809
222	ADAM15	0.0844265	0.742407
223	ADAM17	0.142531	0.329025
224	ADAM19	0.585785	0.427509
225	ADAM20	0.211226	0.0530769
226	ADAM21	0.0724769	0.327808
227	ADAM22	0.375209	0.559971
228	ADAM23	0.480166	0.244986
229	ADAM28	0.431142	0.458576
230	ADAM32	0.0402272	0.233528
231	ADAM33	0.745496	0.552466
232	ADAM8	0.169278	0.564438
233	ADAM9	-0.00399562	0.811061
234	ADAMDEC1	0.213778	0.61663
235	ADAMTS1	0.679692	1.06247
236	ADAMTS10	0.522619	0.395838
237	ADAMTS12	0.232656	0.237937
238	ADAMTS13	0.263526	0.483067
239	ADAMTS14	0.219066	0.153279
240	ADAMTS15	0.478163	0.280004
241	ADAMTS16	0.196063	0.159392
242	ADAMTS17	-0.218911	0.213511
243	ADAMTS18	0.222576	0.101649
244	ADAMTS2	0.503279	0.592133
245	ADAMTS3	-0.0713342	0.416496
246	ADAMTS4	0.445449	0.889302
247	ADAMTS5	0.550811	0.402661
248	ADAMTS6	0.180499	0.229148
249	ADAMTS7	0.44815	0.189178
250	ADAMTS8	0.62645	0.434079
251	ADAMTS9	0.392546	0.502392
252	ADAMTSL1	0.140739	1.05655
253	ADAMTSL2	0.521746	0.521174
254	ADAMTSL3	0.247527	0.642127
255	ADAMTSL4	0.582569	0.351609
256	ADAMTSL5	0.273426	0.304404
257	ADAP1	0.0769646	0.33358
258	ADAP2	0.395797	0.36009
259	ADAR	0.0152519	0.614471
260	ADARB1	-0.0943316	0.475998
261	ADARB2	0.322582	0.56229
262	ADAT1	0.0449017	0.463059
263	ADAT2	-0.230097	0.393965
264	ADAT3	0.214985	0.37651
265	ADCK1	-0.207979	0.437479
266	ADCK2	0.0786426	0.494494
267	ADCK5	0.244694	0.621448
268	ADCY1	-0.13616	0.726336
269	ADCY10	0.0310391	0.14672
270	ADCY2	0.352175	0.50138
271	ADCY3	0.533227	0.508895
272	ADCY4	0.422714	0.398816
273	ADCY5	0.573417	0.617369
274	ADCY6	0.339111	0.662943
275	ADCY7	0.346034	0.329743
276	ADCY9	0.282836	0.406067
277	ADCYAP1	0.145487	0.270464
278	ADCYAP1R1	0.329263	0.240208
279	ADD1	0.398547	0.481964
280	ADD2	0.286734	0.459421
281	ADD3	0.0790966	0.905689
282	ADGRA2	0.609883	0.82295
283	ADGRA3	-0.189281	0.452775
284	ADGRB1	0.301598	0.377393
285	ADGRB2	0.189677	0.348409
286	ADGRB3	0.438982	0.156842
287	ADGRD1	0.427039	0.364831
288	ADGRE1	0.381482	0.122286
289	ADGRE2	0.236909	0.273561
290	ADGRE3	0.183729	0.13428
291	ADGRE5	0.129364	0.654568
292	ADGRF1	0.146606	1.18186
293	ADGRF3	0.0222955	0.0886559
294	ADGRF5	0.085967	1.41541
295	ADGRG1	-0.156036	0.704668
296	ADGRG2	0.336527	0.449381
297	ADGRG3	-0.128123	0.136196
298	ADGRG5	0.292069	0.288375
299	ADGRG6	0.430894	0.628803
300	ADGRL1	0.239909	0.596717
301	ADGRL2	0.288215	0.6322
302	ADGRL3	0.507142	0.176194
303	ADGRL4	0.390888	0.501108
304	ADGRV1	0.149698	0.289907
305	ADH1B	0.324731	0.412764
306	ADH1C	0.251663	0.793693
307	ADH5	0.44237	0.639572
308	ADH6	-0.216282	0.247445
309	ADHFE1	0.207817	0.571635
310	ADI1	0.0644969	0.755748
311	ADIPOR1	-0.241794	0.740729
312	ADIPOR2	-0.0344822	0.509652
313	ADK	0.00996523	0.420784
314	ADM	0.255917	1.03773
315	ADM2	0.240137	0.757013
316	ADM5	0.0410851	0.341986
317	ADNP	-0.195033	0.642581
318	ADNP2	-0.196434	0.485821
319	ADO	0.163453	0.483753
320	ADORA1	0.24117	0.175226
321	ADORA2A	0.168945	0.110233
322	ADORA2B	0.324016	0.389181
323	ADORA3	0.312274	0.354172
324	ADPGK	-0.0660093	0.786871
325	ADPRH	0.104885	0.525429
326	ADPRHL1	0.0686257	0.486954
327	ADPRM	-0.0959712	0.731039
328	ADPRS	-0.174463	0.602202
329	ADRA1A	0.53795	0.404134
330	ADRA1B	0.251007	0.122571
331	ADRA1D	0.559295	0.52806
332	ADRA2A	0.402963	0.885887
333	ADRA2B	0.33148	0.203369
334	ADRA2C	0.43548	0.803457
335	ADRB1	0.306525	0.829082
336	ADRB2	-0.0850293	0.901743
337	ADRM1	-0.0115792	0.615705
338	ADSL	0.29081	0.159241
339	ADSS1	0.170799	0.366744
340	ADSS2	0.0491925	0.547829
341	ADTRP	-0.0236676	0.372255
342	AEBP1	0.481251	0.86391
343	AEBP2	0.120545	0.445374
344	AEN	-0.0505444	0.602688
345	AFAP1	0.322151	0.250733
346	AFAP1L1	0.589026	0.313901
347	AFAP1L2	0.422972	0.644759
348	AFDN	-0.177676	0.707311
349	AFF1	-0.126171	0.569511
350	AFF2	0.220142	0.147383
351	AFF3	0.328827	1.06123
352	AFF4	-0.0529987	0.594703
353	AFG1L	0.0321436	0.208456
354	AFG3L2	-0.157562	0.547329
355	AFMID	0.0235214	0.599891
356	AFTPH	-0.0716898	0.59381
357	AGA	0.113515	0.564627
358	AGAP1	0.291884	0.498118
359	AGAP2	0.350622	0.242169
360	AGAP3	-0.0736903	0.580423
361	AGAP4	-0.00397888	0.335237
362	AGAP5	-0.0114897	0.0955489
363	AGAP6	0.133405	0.147812
364	AGAP9	-0.284044	0.528143
365	AGBL2	-0.0467966	0.213067
366	AGBL3	0.079265	0.205401
367	AGBL4	0.043959	0.11044
368	AGBL5	-0.0226437	0.477313
369	AGER	0.270817	0.70612
370	AGFG1	0.0657593	0.393772
371	AGFG2	-0.0922424	0.627165
372	AGGF1	-0.0302685	0.334984
373	AGK	0.184642	0.392388
374	AGL	-0.0306235	0.545449
375	AGMAT	0.135196	0.560636
376	AGMO	0.0879259	0.251719
377	AGO1	-0.212142	0.428981
378	AGO2	0.271181	0.506985
379	AGO3	-0.0955245	0.291872
380	AGO4	0.0962608	0.499914
381	AGPAT1	0.318888	0.547267
382	AGPAT2	-0.00246205	0.675067
383	AGPAT3	0.0964257	0.539921
384	AGPAT4	0.625016	0.194139
385	AGPAT5	0.172667	0.535617
386	AGPS	0.270494	0.433866
387	AGR2	-0.0931899	1.64137
388	AGRN	0.126204	0.729698
389	AGRP	0.0595535	0.119368
390	AGT	-0.0364018	1.56583
391	AGTPBP1	0.221827	0.470366
392	AGTR1	0.227905	1.3262
393	AGTRAP	0.136558	0.79546
394	AHCTF1	0.255266	0.401598
395	AHCY	-0.119124	0.848654
396	AHCYL1	-0.150953	0.557881
397	AHCYL2	-0.21374	0.547348
398	AHDC1	0.502093	0.414695
399	AHI1	-0.107993	0.426219
400	AHNAK	0.378543	0.737862
401	AHNAK2	0.495642	0.573256
402	AHR	0.447067	0.628543
403	AHRR	-0.198602	0.0940937
404	AHSA1	-0.186125	0.712049
405	AIDA	0.363626	0.669205
406	AIF1	0.40572	0.750309
407	AIF1L	0.453441	0.538039
408	AIFM1	0.25157	0.41295
409	AIFM2	0.561007	0.425368
410	AIFM3	0.18867	0.180671
411	AIG1	0.0476815	0.343499
412	AIM2	0.425274	0.323217
413	AIMP1	-0.0478172	0.390648
414	AIMP2	0.288929	0.489958
415	AIP	0.130261	0.710274
416	AIRE	0.215578	0.0602498
417	AJAP1	0.449601	0.194092
418	AJM1	0.295386	0.511065
419	AJUBA	0.284113	0.61934
420	AK1	0.275048	0.316091
421	AK2	-0.128961	0.499992
422	AK3	0.00855251	0.500559
423	AK4	0.286788	0.610144
424	AK5	0.149578	0.958416
425	AK6	-0.122114	0.485424
426	AK7	0.208604	0.275877
427	AK8	-0.00249097	0.297834
428	AK9	-0.0966724	0.268954
429	AKAP1	0.0314786	0.673339
430	AKAP10	-0.00249225	0.392396
431	AKAP11	-0.0884342	0.613764
432	AKAP12	0.640857	0.704043
433	AKAP13	0.11706	0.580245
434	AKAP17A	-0.228647	0.759666
435	AKAP3	0.241432	0.299177
436	AKAP5	0.264475	0.28463
437	AKAP6	0.360068	0.213147
438	AKAP7	0.328155	0.582288
439	AKAP8	-0.0148199	0.505555
440	AKAP8L	0.0910466	0.565216
441	AKAP9	-0.0872299	0.607706
442	AKIP1	0.20269	0.282464
443	AKIRIN1	0.128349	0.662823
444	AKIRIN2	0.285875	0.459568
445	AKNA	0.334937	0.499283
446	AKR1A1	-0.112341	0.703359
447	AKR1B1	0.427073	0.615623
448	AKR1B10	-0.0486181	0.212445
449	AKR1B15	-0.0986152	0.0727809
450	AKR1C1	0.234294	0.466347
451	AKR1C2	0.217171	0.348884
452	AKR1C3	0.249931	0.684204
453	AKR1E2	0.206831	0.367889
454	AKR7A2	-0.0968759	0.573093
455	AKR7A3	0.19141	0.480226
456	AKT1	0.0634163	0.591725
457	AKT1S1	-0.140661	0.555738
458	AKT2	0.129354	0.481644
459	AKT3	0.0526513	0.532244
460	AKTIP	0.0431054	0.352806
461	ALAD	0.218446	0.640921
462	ALAS1	0.213268	0.617246
463	ALAS2	-0.125261	0.0872319
464	ALB	0.365618	1.03126
465	ALCAM	0.074867	0.829736
466	ALDH16A1	-0.0888344	0.601893
467	ALDH18A1	-0.07847	0.706161
468	ALDH1A1	0.182304	1.30714
469	ALDH1A2	0.617052	0.660602
470	ALDH1A3	-0.0537447	0.933887
471	ALDH1B1	0.490519	0.504488
472	ALDH1L1	0.00135115	0.742799
473	ALDH1L2	0.429292	0.29324
474	ALDH2	0.459711	0.839911
475	ALDH3A1	0.159226	0.298206
476	ALDH3A2	0.35511	0.607625
477	ALDH3B1	0.365949	0.405129
478	ALDH4A1	0.24546	0.878398
479	ALDH5A1	0.113291	0.443431
480	ALDH6A1	0.25627	0.712533
481	ALDH7A1	0.0797549	0.58951
482	ALDH8A1	-0.13994	0.166483
483	ALDH9A1	0.0315084	0.647816
484	ALDOA	0.189185	0.497197
485	ALDOB	-0.0575837	0.108457
486	ALDOC	0.227479	0.609456
487	ALG1	0.0747536	0.394322
488	ALG10	-0.0708593	0.315724
489	ALG10B	-0.22813	0.337943
490	ALG11	-0.109664	0.289025
491	ALG12	-0.110041	0.399577
492	ALG13	0.0546843	0.442523
493	ALG14	-0.16936	0.286911
494	ALG1L2	0.188902	0.140075
495	ALG2	-0.0758723	0.64702
496	ALG3	-0.0056248	0.544925
497	ALG5	0.0730229	0.667192
498	ALG6	0.119789	0.420615
499	ALG8	-0.060025	0.504668
500	ALG9	0.0765437	0.194549
501	ALK	0.0211988	0.0515194
502	ALKAL2	0.379013	0.254002
503	ALKBH1	0.049113	0.316225
504	ALKBH2	0.0298058	0.686991
505	ALKBH3	-0.256037	0.623121
506	ALKBH4	0.133488	0.432839
507	ALKBH5	0.2233	0.542753
508	ALKBH6	-0.0195093	0.217401
509	ALKBH7	-0.142525	0.88723
510	ALKBH8	0.0668147	0.284962
511	ALMS1	-0.218948	0.390256
512	ALOX12	0.0557674	0.118138
513	ALOX15	0.315867	1.06694
514	ALOX15B	0.391855	2.41252
515	ALOX5	0.0753675	0.693986
516	ALOX5AP	0.254679	0.679198
517	ALPK1	0.328717	0.358582
518	ALPK2	0.283865	0.0876831
519	ALPK3	0.413699	0.420144
520	ALPL	0.140884	0.867594
521	ALS2	-0.0390623	0.366657
522	ALS2CL	0.304878	0.549918
523	ALX4	0.323167	0.359863
524	ALYREF	-0.143453	0.601822
525	AMACR	0.1914	1.32508
526	AMBP	0.0573536	0.31986
527	AMBRA1	-0.0526003	0.437644
528	AMD1	-0.00332438	1.0624
529	AMDHD1	-0.0420783	0.123492
530	AMDHD2	0.000346209	0.521464
531	AMER1	0.0755648	0.279794
532	AMFR	0.191688	0.445682
533	AMH	0.27005	0.680793
534	AMHR2	0.113068	0.122509
535	AMIGO1	0.112311	0.484333
536	AMIGO2	0.415009	0.675454
537	AMMECR1	0.156794	0.470421
538	AMMECR1L	0.225272	0.394432
539	AMN	0.0697452	0.240713
540	AMN1	-0.208901	0.301969
541	AMOT	0.291783	0.696896
542	AMOTL1	-0.245191	0.900824
543	AMOTL2	0.462892	0.640738
544	AMPD2	0.364877	0.387266
545	AMPD3	0.0221369	0.797656
546	AMPH	0.483665	0.18733
547	AMT	-0.178225	0.0822441
548	AMY2B	0.350402	0.42598
549	AMZ1	-0.238266	0.0787921
550	AMZ2	0.00897237	0.389642
551	ANAPC1	0.25692	0.340132
552	ANAPC10	0.129209	0.180278
553	ANAPC11	-0.209335	0.673614
554	ANAPC13	-0.0527564	0.542698
555	ANAPC15	-0.15058	0.38672
556	ANAPC16	-0.0796514	0.542811
557	ANAPC2	-0.0231496	0.547904
558	ANAPC4	0.143929	0.390976
559	ANAPC5	-0.071316	0.551218
560	ANAPC7	0.108975	0.396918
561	ANG	0.509202	0.857868
562	ANGEL1	-0.0627735	0.430632
563	ANGEL2	-0.105015	0.463596
564	ANGPT1	0.597907	0.608746
565	ANGPT2	0.301608	0.511834
566	ANGPT4	0.182249	0.0969364
567	ANGPTL1	0.651691	0.514669
568	ANGPTL2	0.401913	0.771184
569	ANGPTL3	0.257675	0.661933
570	ANGPTL4	0.609636	1.14593
571	ANGPTL6	0.042633	0.0980436
572	ANGPTL8	0.283801	0.119697
573	ANK1	0.0415133	0.463761
574	ANK2	0.565082	0.286434
575	ANK3	0.0987832	0.692472
576	ANKAR	-0.0797614	0.212572
577	ANKDD1A	0.607095	0.299281
578	ANKDD1B	0.100164	0.241512
579	ANKEF1	0.105382	0.353939
580	ANKFN1	0.0317372	0.108927
581	ANKFY1	0.198522	0.49576
582	ANKH	0.185586	0.914363
583	ANKHD1	-0.179681	0.104407
584	ANKIB1	0.185986	0.51294
585	ANKK1	0.0359695	0.422235
586	ANKLE1	-0.0135584	0.159759
587	ANKLE2	-0.0404397	0.326353
588	ANKMY1	0.293543	0.309598
589	ANKMY2	0.0441683	0.366686
590	ANKRA2	-0.108461	0.619905
591	ANKRD1	0.224092	0.867702
592	ANKRD10	-0.071857	0.842529
593	ANKRD11	-0.295992	0.499749
594	ANKRD12	-0.0411448	0.436271
595	ANKRD13A	0.268444	0.476534
596	ANKRD13B	0.445914	0.494508
597	ANKRD13C	-0.0327229	0.396294
598	ANKRD13D	0.449487	0.600414
599	ANKRD16	0.289602	0.421235
600	ANKRD17	-0.189022	0.591173
601	ANKRD18A	0.198423	0.266098
602	ANKRD18B	-0.0756275	0.356785
603	ANKRD2	0.0211996	0.387576
604	ANKRD22	-0.204048	0.798184
605	ANKRD23	0.233997	0.240058
606	ANKRD24	0.0396565	0.515551
607	ANKRD26	-0.230543	0.263672
608	ANKRD27	0.310261	0.339091
609	ANKRD28	0.087234	0.386993
610	ANKRD29	0.204254	0.815984
611	ANKRD31	0.0118427	0.103533
612	ANKRD33B	0.541505	0.266642
613	ANKRD34A	0.0410528	0.351871
614	ANKRD35	0.610625	0.491024
615	ANKRD36	-0.0952455	0.2038
616	ANKRD36B	-0.0431854	0.213942
617	ANKRD36C	0.257481	0.162185
618	ANKRD37	0.267646	0.987908
619	ANKRD39	0.10144	0.245343
620	ANKRD40	0.258408	0.472696
621	ANKRD42	0.0472125	0.33287
622	ANKRD44	0.450411	0.315218
623	ANKRD45	-0.121554	0.0923071
624	ANKRD46	-0.101932	0.400501
625	ANKRD49	-0.106573	0.437814
626	ANKRD50	0.0602169	0.66588
627	ANKRD52	0.188443	0.537136
628	ANKRD53	0.16322	0.235306
629	ANKRD54	-0.0248922	0.407806
630	ANKRD55	0.119789	0.091747
631	ANKRD6	0.0840575	0.373839
632	ANKRD61	0.051441	0.227339
633	ANKRD65	0.407931	0.66557
634	ANKRD9	0.303991	0.543821
635	ANKS1A	-0.0319919	0.462083
636	ANKS1B	0.145766	0.1653
637	ANKS3	0.33767	0.525096
638	ANKS6	0.171646	0.533374
639	ANKZF1	-0.0111145	0.638416
640	ANLN	0.462592	0.553835
641	ANO1	0.444776	0.655646
642	ANO10	0.0757704	0.405125
643	ANO2	0.0545596	0.15837
644	ANO3	0.0964414	0.202855
645	ANO4	0.458736	0.533678
646	ANO5	0.397603	0.541009
647	ANO6	0.531896	0.60561
648	ANO7	0.337856	1.27278
649	ANO8	0.175789	0.465261
650	ANO9	0.132719	0.675136
651	ANOS1	0.35346	0.606631
652	ANP32A	-0.107579	0.58466
653	ANP32B	0.0424235	0.701768
654	ANP32E	0.617637	0.53822
655	ANPEP	0.363275	2.42679
656	ANTKMT	0.139481	0.706315
657	ANTXR1	0.545848	0.754275
658	ANTXR2	0.34106	0.786729
659	ANXA1	0.497107	0.897638
660	ANXA10	0.0184258	0.193808
661	ANXA11	0.197624	0.579826
662	ANXA13	-0.186215	0.209185
663	ANXA2	0.51173	0.800627
664	ANXA2R	0.0143583	0.610109
665	ANXA3	0.117825	0.790766
666	ANXA4	0.32571	0.432307
667	ANXA5	-0.163077	0.780303
668	ANXA6	0.576596	0.618829
669	ANXA7	-0.110243	0.631605
670	ANXA8	0.0700717	0.42527
671	ANXA9	-0.174726	0.615505
672	AOAH	0.331926	0.530154
673	AOC1	0.300016	1.64873
674	AOC2	-0.0136107	0.374914
675	AOC3	0.661141	0.74697
676	AOPEP	0.574727	0.436313
677	AOX1	0.5857	0.832869
678	AP1AR	0.144255	0.379803
679	AP1B1	-0.143675	0.595848
680	AP1G1	0.10786	0.542289
681	AP1G2	0.0377172	0.62764
682	AP1M1	0.410545	0.266243
683	AP1M2	0.0945108	0.720952
684	AP1S1	-0.0891818	0.582072
685	AP1S2	0.415364	0.327885
686	AP1S3	-0.0553235	0.458911
687	AP2A1	0.326022	0.363049
688	AP2A2	0.0617621	0.411068
689	AP2B1	0.0344308	0.608669
690	AP2M1	0.190017	0.653134
691	AP2S1	-0.117747	0.907293
692	AP3B1	0.21055	0.45301
693	AP3B2	0.201517	0.269392
694	AP3D1	0.0486975	0.584283
695	AP3M1	0.100179	0.567497
696	AP3M2	0.0551827	0.468877
697	AP3S1	0.00985357	0.403352
698	AP3S2	0.0517382	0.349246
699	AP4B1	0.171672	0.278513
700	AP4E1	0.182952	0.291018
701	AP4M1	0.104999	0.378313
702	AP4S1	0.48457	0.141168
703	AP5B1	0.334745	0.472199
704	AP5M1	0.18861	0.314653
705	AP5S1	-0.215895	0.384937
706	AP5Z1	-0.038763	0.393062
707	APAF1	-0.0679333	0.479683
708	APBA1	0.116102	0.325886
709	APBA2	0.409678	0.549356
710	APBA3	0.184028	0.365121
711	APBB1	0.438535	0.537152
712	APBB1IP	0.414651	0.50086
713	APBB2	0.344147	0.338882
714	APBB3	0.09936	0.569028
715	APC	0.0345778	0.481887
716	APC2	0.355392	0.149872
717	APCDD1	0.22251	0.824893
718	APCDD1L	0.0199366	0.126799
719	APEH	-0.04815	0.724041
720	APEX1	-0.00943478	0.787995
721	APEX2	-0.226562	0.414682
722	APH1A	-0.0335373	0.730918
723	APH1B	-0.117766	0.522637
724	API5	0.0592442	0.499873
725	APIP	-0.286739	0.47436
726	APLF	0.514284	0.195763
727	APLN	0.403656	0.779343
728	APLNR	0.158886	0.64304
729	APLP1	0.0429631	0.544699
730	APLP2	-0.0154095	0.846963
731	APMAP	-0.0171191	0.663547
732	APOA1	0.108831	0.292888
733	APOB	0.066677	0.119524
734	APOBEC2	-0.0459355	0.412861
735	APOBEC3A	0.0853788	0.233783
736	APOBEC3B	0.00724452	0.329588
737	APOBEC3C	0.500475	0.859941
738	APOBEC3D	0.241397	0.0966316
739	APOBEC3F	0.252426	0.513147
740	APOBEC3G	0.458606	0.529942
741	APOBEC3H	0.311255	0.261811
742	APOBR	0.0751911	0.535046
743	APOC1	-0.0248764	1.17417
744	APOD	-0.0513446	1.27984
745	APOE	0.00258565	1.31264
746	APOF	0.160085	1.04918
747	APOL1	0.49209	0.843302
748	APOL2	0.119228	0.534802
749	APOL3	0.271541	0.619962
750	APOL4	0.0577814	1.34192
751	APOL6	0.462151	0.659303
752	APOLD1	0.273855	0.787118
753	APOM	0.364658	0.334949
754	APOO	0.0461334	0.461135
755	APOOL	-0.195058	0.560748
756	APP	-0.0404104	0.923042
757	APPBP2	0.052004	0.460346
758	APPL1	0.122446	0.465229
759	APPL2	-0.100706	0.668884
760	APRT	-0.058462	0.936203
761	APTR	0.2737	0.329622
762	APTX	0.0601984	0.319562
763	AQP1	0.406067	0.723972
764	AQP11	0.134127	0.916856
765	AQP3	0.152584	1.14861
766	AQP5	0.388969	0.357569
767	AQP6	-0.0393151	0.120981
768	AQP7	0.310897	0.150657
769	AQP8	-0.0207398	0.18771
770	AQP9	0.124939	0.299875
771	AQR	-0.291715	0.436046
772	AR	0.240733	0.684023
773	ARAF	0.0286406	0.583421
774	ARAP1	0.18708	0.552436
775	ARAP2	0.0173584	0.37527
776	ARAP3	0.386841	0.469309
777	ARC	0.142774	0.455219
778	ARCN1	-0.0031084	0.720226
779	AREG	0.245115	0.967671
780	AREL1	0.184303	0.481627
781	ARF1	-0.27352	0.788438
782	ARF3	0.0357654	0.581756
783	ARF4	-0.108143	0.919317
784	ARF5	-0.150064	0.720592
785	ARF6	-0.261017	0.675829
786	ARFGAP1	0.036251	0.65415
787	ARFGAP2	-0.165973	0.612063
788	ARFGAP3	-0.141694	0.801035
789	ARFGEF1	0.102839	0.510957
790	ARFGEF2	-0.0961865	0.635922
791	ARFGEF3	0.0777826	0.91975
792	ARFIP1	-0.018532	0.488888
793	ARFIP2	-0.0969611	0.686763
794	ARFRP1	0.164373	0.500755
795	ARG1	-0.0181482	0.259136
796	ARG2	0.500204	1.19708
797	ARGLU1	-0.0171832	0.94914
798	ARHGAP1	0.203132	0.559994
799	ARHGAP10	0.533726	0.413617
800	ARHGAP11A	0.38258	0.342548
801	ARHGAP11B	-0.214798	0.0986535
802	ARHGAP12	-0.0881063	0.579579
803	ARHGAP15	0.560956	0.33767
804	ARHGAP17	0.348372	0.316375
805	ARHGAP18	0.157081	0.627405
806	ARHGAP19	-0.134162	0.371721
807	ARHGAP20	0.479186	0.396241
808	ARHGAP21	0.125744	0.478329
809	ARHGAP22	0.233477	0.260001
810	ARHGAP23	0.588582	0.578455
811	ARHGAP24	0.302314	0.263
812	ARHGAP25	0.424301	0.420464
813	ARHGAP26	0.0223357	0.454508
814	ARHGAP27	0.397724	0.563495
815	ARHGAP28	0.00589821	0.6919
816	ARHGAP29	-0.13238	0.603531
817	ARHGAP30	0.38625	0.61145
818	ARHGAP31	0.49548	0.416526
819	ARHGAP32	-0.0222522	0.596098
820	ARHGAP33	0.347748	0.585664
821	ARHGAP35	0.115405	0.533691
822	ARHGAP39	0.381196	0.531437
823	ARHGAP4	0.518185	0.546964
824	ARHGAP40	0.22382	0.626237
825	ARHGAP42	0.188276	0.327306
826	ARHGAP44	-0.000313016	0.349362
827	ARHGAP45	0.414777	0.603751
828	ARHGAP5	0.109134	0.610739
829	ARHGAP6	-0.145661	0.731764
830	ARHGAP8	-0.097054	0.301303
831	ARHGAP9	0.429711	0.482619
832	ARHGDIA	-0.0975658	0.704269
833	ARHGDIB	0.1889	0.904505
834	ARHGDIG	0.353405	0.783616
835	ARHGEF1	0.204768	0.506155
836	ARHGEF10	-0.20526	0.109711
837	ARHGEF10L	0.415682	0.398922
838	ARHGEF11	0.136823	0.53332
839	ARHGEF12	0.263951	0.480174
840	ARHGEF15	0.419948	0.397887
841	ARHGEF16	0.176788	0.62916
842	ARHGEF17	0.381741	0.520131
843	ARHGEF18	0.219098	0.34524
844	ARHGEF19	0.0893684	0.694214
845	ARHGEF2	0.5371	0.418355
846	ARHGEF25	0.576923	0.459077
847	ARHGEF26	0.110179	0.885546
848	ARHGEF28	0.388023	0.380573
849	ARHGEF3	0.12751	0.595256
850	ARHGEF33	0.230069	0.12603
851	ARHGEF35	0.127904	0.52256
852	ARHGEF37	0.0982386	0.678916
853	ARHGEF38	0.090152	0.680986
854	ARHGEF39	0.143032	0.266543
855	ARHGEF4	0.212618	0.358217
856	ARHGEF40	0.578367	0.414443
857	ARHGEF5	-0.0291559	0.418222
858	ARHGEF6	0.398459	0.472365
859	ARHGEF7	0.132172	0.554649
860	ARHGEF9	0.164797	0.290683
861	ARID1A	-0.0535844	0.578525
862	ARID1B	-0.181758	0.399318
863	ARID2	-0.258635	0.447038
864	ARID3A	0.2368	0.396598
865	ARID3B	-0.189229	0.338922
866	ARID3C	-0.0200109	0.178203
867	ARID4A	-0.0444909	0.449206
868	ARID4B	0.0160597	0.419732
869	ARID5A	0.410056	0.780478
870	ARID5B	-0.204581	0.690366
871	ARIH1	0.0371602	0.298001
872	ARIH2	-0.10935	0.523419
873	ARL1	-0.085745	0.542898
874	ARL10	0.382103	0.269394
875	ARL11	0.294835	0.177958
876	ARL13A	0.0623665	0.0889253
877	ARL13B	0.0433935	0.432754
878	ARL14EP	0.138616	0.356869
879	ARL15	-0.000392966	0.477522
880	ARL16	0.0131495	0.633626
881	ARL17A	-0.164477	0.13376
882	ARL17B	-0.178312	0.151193
883	ARL2	-0.0201441	0.690965
884	ARL2BP	0.129513	0.174926
885	ARL3	-0.218819	0.538958
886	ARL4A	0.242579	0.53212
887	ARL4C	0.598009	0.6248
888	ARL4D	0.554568	0.703041
889	ARL5A	0.101996	0.478146
890	ARL5B	0.0741286	0.590142
891	ARL6	0.114042	0.331254
892	ARL6IP1	-0.0472312	0.729665
893	ARL6IP4	0.0618153	0.164853
894	ARL6IP5	0.0340374	0.724606
895	ARL6IP6	0.0843314	0.421032
896	ARL8A	-0.056871	0.486293
897	ARL8B	0.163693	0.50247
898	ARL9	-0.196209	0.332086
899	ARMC1	0.136667	0.503045
900	ARMC10	0.0184079	0.379671
901	ARMC12	-0.0337318	0.421517
902	ARMC2	0.0598854	0.239993
903	ARMC5	-0.03845	0.450896
904	ARMC6	0.0327603	0.463348
905	ARMC7	-0.0113828	0.486751
906	ARMC8	0.134465	0.350071
907	ARMC9	0.0627822	0.236637
908	ARMCX1	0.590368	0.886848
909	ARMCX2	0.30792	0.785208
910	ARMCX3	-0.0220798	0.579757
911	ARMCX4	0.230625	0.43798
912	ARMCX5	0.0907831	0.375848
913	ARMCX6	-0.164849	0.535988
914	ARMH1	0.0659277	0.41297
915	ARMH3	-0.02142	0.410235
916	ARMH4	0.485263	0.23909
917	ARMT1	0.0911779	0.437124
918	ARNT	0.226124	0.450041
919	ARNT2	-0.0931186	0.555782
920	ARPC1A	0.11769	0.599275
921	ARPC1B	0.163172	0.156077
922	ARPC2	0.302507	0.610662
923	ARPC3	-0.155884	0.719999
924	ARPC4	-0.220656	0.686998
925	ARPC5	0.276195	0.364145
926	ARPC5L	-0.0489902	0.621183
927	ARPIN	-0.108657	0.433949
928	ARPP19	0.257471	0.529318
929	ARR3	-0.112479	0.183613
930	ARRB1	0.285394	0.448973
931	ARRB2	0.338508	0.492701
932	ARRDC1	-0.278493	0.712373
933	ARRDC2	0.283602	0.635619
934	ARRDC3	0.169761	0.859687
935	ARRDC4	-0.0170455	0.597923
936	ARRDC5	0.229857	0.179279
937	ARSA	0.0778441	0.662671
938	ARSB	0.221515	0.352409
939	ARSD	-0.040736	0.631046
940	ARSG	0.0339656	0.418061
941	ARSI	0.616532	0.246008
942	ARSJ	0.471108	0.524689
943	ARSK	-0.0735872	0.427093
944	ARSL	0.0441661	0.227793
945	ART3	-0.20387	0.32017
946	ART4	0.24812	0.488909
947	ART5	0.234395	0.330991
948	ARTN	0.442782	0.350885
949	ARV1	-0.141326	0.468555
950	ARVCF	0.0920771	0.537146
951	ASAH1	0.0615914	0.694087
952	ASAH2	0.053687	0.11057
953	ASAH2B	-0.109402	0.234192
954	ASAP1	0.411345	0.47541
955	ASAP2	0.165349	0.564447
956	ASAP3	0.189212	0.551551
957	ASB1	0.211773	0.43547
958	ASB12	0.0510788	0.178087
959	ASB13	-0.124174	0.553058
960	ASB14	-0.16854	0.113741
961	ASB16	-0.065415	0.283887
962	ASB2	0.689351	0.637539
963	ASB3	0.0910246	0.441338
964	ASB4	0.0193493	0.0737985
965	ASB6	0.206354	0.42709
966	ASB7	-0.210384	0.332061
967	ASB8	0.00129305	0.387874
968	ASB9	-0.0321804	0.683133
969	ASCC1	-0.0283013	0.40811
970	ASCC2	-0.0732846	0.478143
971	ASCC3	0.305156	0.517042
972	ASCL2	0.189276	0.77895
973	ASCL5	-0.0105764	0.128029
974	ASF1A	0.205159	0.421392
975	ASF1B	0.404874	0.735041
976	ASGR1	0.266819	0.177912
977	ASGR2	0.306224	0.148801
978	ASH1L	-0.0834663	0.529273
979	ASH2L	-0.0871724	0.476006
980	ASIC1	0.05289	0.461114
981	ASIC2	0.375681	0.386942
982	ASIC3	0.0997073	0.530077
983	ASIC4	0.0195107	0.0860534
984	ASIP	-0.104497	0.165483
985	ASL	0.0858458	0.495624
986	ASMT	0.0581753	0.0815408
987	ASMTL	0.146132	0.45636
988	ASNS	0.143621	0.1232
989	ASNSD1	-0.128469	0.396939
990	ASPA	0.589362	0.284487
991	ASPDH	-0.140225	0.166935
992	ASPG	-0.114386	0.14812
993	ASPH	0.186414	0.568831
994	ASPHD1	0.122124	0.626879
995	ASPHD2	-0.00108483	0.379415
996	ASPM	0.464556	0.398759
997	ASPN	0.296245	0.919567
998	ASPRV1	0.473386	0.235126
999	ASPSCR1	-0.00149088	0.494114
1000	ASRGL1	0.197884	0.900059
1001	ASS1	-0.12363	1.0464
1002	ASTE1	0.164287	0.323139
1003	ASTN1	0.265093	0.18753
1004	ASTN2	0.241374	0.74556
1005	ASXL1	0.0346694	0.51367
1006	ASXL2	0.206246	0.471846
1007	ASXL3	0.159627	0.185495
1008	ATAD1	0.106065	0.822849
1009	ATAD2	-0.0794278	0.71546
1010	ATAD2B	0.183505	0.348458
1011	ATAD3A	0.00581169	0.624348
1012	ATAD3B	0.130063	0.676986
1013	ATAD3C	0.340907	0.459731
1014	ATAD5	0.200768	0.246536
1015	ATAT1	0.169126	0.587268
1016	ATE1	0.0452225	0.478934
1017	ATF1	-0.102927	0.477108
1018	ATF2	-0.105584	0.49044
1019	ATF3	0.429475	1.71601
1020	ATF4	-0.173013	0.860414
1021	ATF5	-0.134579	0.743273
1022	ATF6	0.0351461	0.502168
1023	ATF6B	-0.142871	0.669413
1024	ATF7	-0.135496	0.381484
1025	ATF7IP	0.0459495	0.514128
1026	ATF7IP2	-0.272186	0.541147
1027	ATG10	-0.0134012	0.257078
1028	ATG101	0.0417211	0.502704
1029	ATG12	0.0549741	0.308817
1030	ATG13	-0.0575035	0.430496
1031	ATG14	-0.185751	0.462052
1032	ATG16L1	-0.161263	0.436168
1033	ATG16L2	0.210136	0.588163
1034	ATG2A	0.0497668	0.500724
1035	ATG2B	-0.125276	0.480688
1036	ATG3	0.0833954	0.433277
1037	ATG4A	0.0152923	0.464877
1038	ATG4B	0.074073	0.582068
1039	ATG4C	0.0974991	0.322899
1040	ATG4D	-0.0928541	0.519305
1041	ATG5	0.292293	0.415629
1042	ATG7	-0.143584	0.329548
1043	ATG9A	-0.0239596	0.628753
1044	ATG9B	0.207233	0.330337
1045	ATIC	0.00652054	0.654883
1046	ATL1	-0.0149055	0.434079
1047	ATL2	0.422676	0.466794
1048	ATL3	0.278683	0.445311
1049	ATM	0.190225	0.439208
1050	ATMIN	0.0378774	0.553719
1051	ATN1	-0.00209042	0.708291
1052	ATOH7	0.117446	0.14259
1053	ATOH8	0.375893	0.611266
1054	ATOX1	-0.101412	0.613811
1055	ATP10A	0.047809	0.321835
1056	ATP10B	0.0718797	0.0417552
1057	ATP10D	0.303418	0.493852
1058	ATP11A	0.187607	0.966817
1059	ATP11B	-0.0307475	0.75971
1060	ATP11C	0.2765	0.44324
1061	ATP13A1	-0.00143182	0.538397
1062	ATP13A2	0.0621601	0.620261
1063	ATP13A3	-0.0462109	0.597136
1064	ATP13A4	0.0633464	0.108037
1065	ATP1A1	-0.14744	1.08267
1066	ATP1A2	0.615794	0.888407
1067	ATP1A3	0.0648157	0.0827271
1068	ATP1A4	0.374737	0.113422
1069	ATP1B1	0.396266	0.87609
1070	ATP1B2	0.345595	0.445275
1071	ATP1B3	-0.0771446	0.667647
1072	ATP23	-0.163638	0.243255
1073	ATP2A1	0.215638	0.472509
1074	ATP2A2	0.424275	0.596721
1075	ATP2A3	0.234221	0.846433
1076	ATP2B1	0.0639143	0.519198
1077	ATP2B2	0.116485	0.0505105
1078	ATP2B4	0.603958	0.769652
1079	ATP2C1	4.83383e-05	0.759461
1080	ATP2C2	0.17044	0.760328
1081	ATP5F1A	-0.153288	0.650723
1082	ATP5F1B	-0.0197403	0.911846
1083	ATP5F1C	-0.0763983	0.746628
1084	ATP5F1D	-0.0870299	0.875173
1085	ATP5F1E	-0.0234558	0.789791
1086	ATP5IF1	-0.175259	0.664498
1087	ATP5MC1	-0.142461	0.74741
1088	ATP5MC2	-0.268903	0.70407
1089	ATP5MC3	0.149571	0.651871
1090	ATP5ME	-0.264453	0.945724
1091	ATP5MF	-0.121581	0.755122
1092	ATP5MG	0.0474562	0.545826
1093	ATP5MGL	0.0906347	0.124775
1094	ATP5PB	0.00103897	0.662595
1095	ATP5PD	-0.212498	0.653047
1096	ATP5PF	-0.197469	0.574616
1097	ATP5PO	-0.00266946	0.652671
1098	ATP6AP1	-0.0769632	0.807153
1099	ATP6AP2	0.0253859	0.480552
1100	ATP6V0A1	0.393745	0.4152
1101	ATP6V0A2	0.0239798	0.281292
1102	ATP6V0B	0.0433422	0.826672
1103	ATP6V0C	-0.0852825	0.1716
1104	ATP6V0D1	0.0266318	0.502124
1105	ATP6V0D2	0.0344043	0.282704
1106	ATP6V0E1	0.0671596	0.748003
1107	ATP6V0E2	0.0627421	0.783327
1108	ATP6V1A	0.0941972	0.603249
1109	ATP6V1B2	0.126578	0.485253
1110	ATP6V1C1	0.184553	0.598628
1111	ATP6V1C2	0.148681	0.608965
1112	ATP6V1D	0.101826	0.527377
1113	ATP6V1E1	0.0420799	0.462071
1114	ATP6V1E2	0.0499579	0.335815
1115	ATP6V1F	-0.146243	0.767094
1116	ATP6V1G1	-0.126721	0.711762
1117	ATP6V1G2	0.351475	0.218053
1118	ATP6V1H	0.181975	0.477649
1119	ATP7A	-0.150455	0.490095
1120	ATP7B	0.0742013	0.502687
1121	ATP8A1	0.0715497	0.733018
1122	ATP8A2	0.301132	0.98632
1123	ATP8B1	0.0534742	0.684484
1124	ATP8B2	0.290471	0.738628
1125	ATP8B3	0.129117	0.128444
1126	ATP8B4	0.445117	0.661714
1127	ATP9A	0.036823	0.64507
1128	ATP9B	-0.399301	0.33194
1129	ATPAF1	0.193736	0.492288
1130	ATPAF2	0.146204	0.3212
1131	ATPSCKMT	0.173901	0.450341
1132	ATR	0.200399	0.339216
1133	ATRAID	-0.169682	0.596801
1134	ATRIP	-0.00152723	0.365346
1135	ATRN	0.0603567	0.427095
1136	ATRNL1	0.371676	0.342122
1137	ATRX	-0.140714	0.479006
1138	ATXN1	-0.0091408	0.501292
1139	ATXN10	-0.118555	0.643926
1140	ATXN1L	0.00444497	0.489181
1141	ATXN2	-0.0656121	0.479358
1142	ATXN2L	0.10572	0.589876
1143	ATXN3	0.0525537	0.361107
1144	ATXN7	-0.08561	0.454331
1145	ATXN7L1	0.0263258	0.336339
1146	ATXN7L2	0.241879	0.330015
1147	ATXN7L3	0.287584	0.509313
1148	ATXN7L3B	-0.175207	0.604819
1149	AUH	0.0413054	0.701284
1150	AUNIP	0.205723	0.219568
1151	AUP1	-0.236938	0.680417
1152	AURKA	0.485243	0.541223
1153	AURKAIP1	-0.144068	0.88118
1154	AURKB	0.34093	0.6283
1155	AURKC	-0.0764594	0.29839
1156	AUTS2	0.27998	0.499568
1157	AVEN	-0.280142	0.378937
1158	AVIL	0.114828	0.284451
1159	AVL9	0.0788894	0.442448
1160	AVPI1	0.54094	0.755914
1161	AVPR1A	0.242255	0.414322
1162	AVPR2	0.350506	0.267447
1163	AXDND1	-0.170139	0.135463
1164	AXIN1	0.265866	0.389593
1165	AXIN2	0.294349	0.548107
1166	AXL	0.572992	0.588277
1167	AZGP1	0.343773	1.70715
1168	AZI2	0.0917638	0.348949
1169	AZIN1	-0.0934368	0.782173
1170	AZIN2	0.259008	0.245867
1171	AZU1	-0.224324	0.225913
1172	B2M	0.287427	1.03187
1173	B3GALNT1	0.0565838	0.525613
1174	B3GALNT2	0.292355	0.409351
1175	B3GALT1	0.0736595	0.156932
1176	B3GALT2	0.552713	0.462114
1177	B3GALT4	0.402607	0.483449
1178	B3GALT5	0.163864	0.240237
1179	B3GALT6	-0.0994374	0.675637
1180	B3GAT1	0.157764	0.882037
1181	B3GAT2	0.213375	0.0749122
1182	B3GAT3	-0.0915204	0.718494
1183	B3GLCT	-0.0316556	0.312048
1184	B3GNT2	0.200006	0.585638
1185	B3GNT4	-0.06919	0.144378
1186	B3GNT5	0.203631	0.694488
1187	B3GNT7	0.243155	0.45294
1188	B3GNT8	0.439863	0.378988
1189	B3GNT9	0.429997	0.58627
1190	B3GNTL1	0.255378	0.310428
1191	B4GALNT1	0.632786	0.242733
1192	B4GALNT3	0.125293	0.583532
1193	B4GALNT4	0.476147	0.911213
1194	B4GALT1	0.327633	0.590027
1195	B4GALT2	0.15678	0.532947
1196	B4GALT3	-0.0664197	0.580269
1197	B4GALT4	0.11515	0.348159
1198	B4GALT5	0.163852	0.567001
1199	B4GALT6	0.0708195	0.394009
1200	B4GALT7	-0.163007	0.496438
1201	B4GAT1	0.178805	0.554245
1202	B9D1	0.13008	0.330753
1203	B9D2	-0.0329552	0.47047
1204	BAALC	0.223246	0.181339
1205	BAAT	0.0453829	0.105055
1206	BABAM1	-0.0282104	0.55792
1207	BABAM2	-0.052104	0.428393
1208	BACE1	0.510989	0.28577
1209	BACE2	0.250411	0.914018
1210	BACH1	-0.101124	0.572761
1211	BACH2	0.356405	0.272052
1212	BAD	-0.0732605	0.612942
1213	BAG1	0.029242	0.625985
1214	BAG2	0.235168	0.470998
1215	BAG3	0.396434	0.637161
1216	BAG4	-0.0921936	0.458091
1217	BAG5	-0.191355	0.498811
1218	BAG6	-0.111221	0.648264
1219	BAHCC1	0.0909744	0.419538
1220	BAHD1	0.103899	0.435286
1221	BAIAP2	0.226475	0.653727
1222	BAIAP2L1	-0.0558551	0.601113
1223	BAIAP2L2	0.201437	0.941711
1224	BAIAP3	0.23685	0.663157
1225	BAK1	0.169345	0.465958
1226	BAMBI	0.0963347	1.08203
1227	BANF1	-0.280615	0.823462
1228	BANK1	0.0715692	1.24447
1229	BANP	0.0667552	0.2512
1230	BAP1	0.00967491	0.518725
1231	BARD1	0.100474	0.422113
1232	BARX2	0.0793665	0.773442
1233	BASP1	0.224732	1.09578
1234	BATF	0.359467	0.817449
1235	BATF2	0.346189	0.436965
1236	BATF3	0.395111	0.3242
1237	BAX	-0.0823751	0.663012
1238	BAZ1A	0.0270548	0.518318
1239	BAZ1B	0.0278654	0.481008
1240	BAZ2A	0.0771668	0.594581
1241	BAZ2B	0.105264	0.386071
1242	BBC3	0.251316	0.50017
1243	BBIP1	-0.103987	0.285183
1244	BBOF1	-0.169978	0.317258
1245	BBOX1	0.0364219	0.396167
1246	BBS1	0.177451	0.118288
1247	BBS10	0.052788	0.455477
1248	BBS12	0.0326348	0.336879
1249	BBS2	-0.060123	0.460425
1250	BBS4	0.0444207	0.766806
1251	BBS5	0.146499	0.284707
1252	BBS7	-0.136298	0.365133
1253	BBS9	0.117559	0.260071
1254	BBX	0.284761	0.528699
1255	BCAM	-0.0838144	0.999831
1256	BCAN	0.0910235	0.17185
1257	BCAP29	-0.00876612	0.20024
1258	BCAP31	-0.0737283	0.739597
1259	BCAR1	0.0874731	0.527784
1260	BCAR3	0.379574	0.437881
1261	BCAS1	0.444749	0.922668
1262	BCAS2	0.019916	0.59478
1263	BCAS3	0.116336	0.350077
1264	BCAS4	0.519353	0.401162
1265	BCAT1	0.156102	0.429896
1266	BCAT2	0.088811	0.756456
1267	BCCIP	-0.0708342	0.571618
1268	BCDIN3D	0.143222	0.285518
1269	BCHE	0.322843	0.663413
1270	BCKDHA	-0.0659239	0.132343
1271	BCKDHB	-0.0452265	0.546786
1272	BCKDK	0.111453	0.405186
1273	BCL10	-0.100753	0.455736
1274	BCL11A	0.27444	0.413413
1275	BCL11B	0.398926	0.314575
1276	BCL2	0.553134	0.562228
1277	BCL2A1	0.245993	0.683191
1278	BCL2L1	-0.0960333	0.542684
1279	BCL2L10	0.22684	0.522954
1280	BCL2L11	0.0446061	0.466463
1281	BCL2L12	-0.00705911	0.562442
1282	BCL2L13	-0.272968	0.460327
1283	BCL2L14	-0.153195	0.479894
1284	BCL2L15	0.14163	0.182734
1285	BCL2L2	0.0104128	0.595923
1286	BCL3	0.107858	0.912102
1287	BCL6	0.217123	0.731149
1288	BCL6B	0.376083	0.473755
1289	BCL7A	0.138556	0.456997
1290	BCL7B	0.312422	0.459654
1291	BCL7C	0.256915	0.464784
1292	BCL9	0.0323934	0.584984
1293	BCL9L	0.0582716	0.685925
1294	BCLAF1	-0.172507	0.491488
1295	BCLAF3	-0.266833	0.399528
1296	BCO1	-0.070658	0.292358
1297	BCO2	0.280099	0.147721
1298	BCOR	0.137545	0.677368
1299	BCORL1	0.071844	0.432799
1300	BCR	-0.0948222	0.459946
1301	BCS1L	0.0504867	0.523953
1302	BDH1	0.240758	0.589173
1303	BDH2	0.406497	0.482661
1304	BDKRB1	0.090238	0.11001
1305	BDKRB2	0.370444	0.472786
1306	BDNF	0.438461	0.188717
1307	BDP1	-0.0998102	0.547141
1308	BEAN1	0.145835	0.149375
1309	BECN1	0.116218	0.573496
1310	BEGAIN	0.645483	0.190428
1311	BEND3	0.401461	0.551865
1312	BEND4	0.201842	0.959369
1313	BEND5	0.358874	0.390006
1314	BEND6	0.465029	0.20741
1315	BEND7	0.207701	0.39319
1316	BEST1	0.300005	0.201639
1317	BEST4	-0.0733875	0.131873
1318	BET1	-0.0445914	0.36962
1319	BET1L	-0.0185969	0.506482
1320	BEX1	0.480691	0.956975
1321	BEX2	0.212157	0.781488
1322	BEX3	0.231004	0.77032
1323	BEX4	0.190566	0.721996
1324	BEX5	0.212885	1.02523
1325	BFAR	0.0841937	0.485236
1326	BFSP1	-0.03671	0.210239
1327	BFSP2	-0.088275	0.0720234
1328	BGLAP	0.0874128	0.373449
1329	BGN	0.403097	0.928106
1330	BHLHA15	0.231882	1.03867
1331	BHLHE22	0.361558	0.144469
1332	BHLHE40	0.38774	1.2052
1333	BHLHE41	0.217444	0.819672
1334	BHMT	0.164917	0.0635633
1335	BHMT2	0.631462	0.476092
1336	BICC1	0.0667466	0.600571
1337	BICD1	0.557308	0.688839
1338	BICD2	0.297105	0.448612
1339	BICDL1	0.12173	0.500993
1340	BICDL2	-0.125071	0.798319
1341	BICRA	0.267402	0.369824
1342	BICRAL	-0.0992153	0.473809
1343	BID	-0.184211	0.400652
1344	BIK	-0.076794	0.878714
1345	BIN1	0.5259	0.503668
1346	BIN2	0.383383	0.473558
1347	BIN3	0.277021	0.387914
1348	BIRC2	0.0308754	0.563266
1349	BIRC3	0.273711	0.806691
1350	BIRC5	0.434532	0.772306
1351	BIRC6	0.0458822	0.542207
1352	BIRC7	0.108196	0.206437
1353	BISPR	0.492787	0.340597
1354	BIVM	0.0118701	0.334884
1355	BLACAT1	-0.0139796	0.102773
1356	BLCAP	0.028158	0.483471
1357	BLK	0.399604	0.333572
1358	BLM	0.364007	0.261662
1359	BLMH	0.139718	0.429479
1360	BLNK	-0.078516	0.480282
1361	BLOC1S1	0.125792	0.679264
1362	BLOC1S2	-0.150082	0.552484
1363	BLOC1S3	-0.0658355	0.357616
1364	BLOC1S4	-0.0742179	0.579679
1365	BLOC1S5	-0.0268837	0.300084
1366	BLOC1S6	-0.101808	0.564566
1367	BLVRA	0.218973	0.62426
1368	BLVRB	0.205077	0.777213
1369	BLZF1	0.096142	0.427466
1370	BMERB1	0.62179	0.50701
1371	BMF	-0.107261	0.620527
1372	BMI1	-0.14058	0.479541
1373	BMP1	0.574512	0.380658
1374	BMP2	0.328341	0.538369
1375	BMP2K	0.179262	0.24912
1376	BMP4	0.401097	0.656385
1377	BMP5	0.336057	0.802478
1378	BMP6	0.297809	0.871206
1379	BMP7	0.248706	0.830219
1380	BMP8A	0.296973	0.359436
1381	BMP8B	0.0428525	0.458394
1382	BMPER	0.542879	0.498821
1383	BMPR1A	0.228197	0.461005
1384	BMPR1B	0.0642871	0.872141
1385	BMPR2	0.0192995	0.499362
1386	BMS1	0.0349563	0.499204
1387	BMS1P4	-0.0758349	0.174125
1388	BMX	0.115642	0.5011
1389	BNC1	0.323872	0.136831
1390	BNC2	0.644143	0.290206
1391	BNIP1	0.127487	0.376675
1392	BNIP2	0.401948	0.422989
1393	BNIP3	0.231153	0.639614
1394	BNIP3L	0.298743	0.563792
1395	BNIPL	0.510455	0.707017
1396	BOC	0.561556	0.593246
1397	BOD1	0.0229786	0.661814
1398	BOD1L1	-0.193603	0.511295
1399	BOK	-0.0829399	0.749881
1400	BOLA1	-0.157839	0.537155
1401	BOLA2B	-0.299768	0.29024
1402	BOLA3	-0.0354582	0.381163
1403	BOP1	0.201035	0.745197
1404	BORA	-0.0241951	0.262281
1405	BORCS5	-0.0447618	0.268082
1406	BORCS6	0.139711	0.540127
1407	BORCS7	-0.145421	0.612032
1408	BORCS8	-0.0897732	0.418576
1409	BPGM	0.0534581	0.416837
1410	BPHL	0.138814	0.489046
1411	BPI	0.215283	0.117141
1412	BPNT1	0.0538447	0.544336
1413	BPNT2	0.0777355	0.614842
1414	BPTF	-0.115262	0.504641
1415	BRAF	0.0289496	0.443099
1416	BRAP	0.0645365	0.308005
1417	BRAT1	-0.0569907	0.600082
1418	BRCA1	0.413158	0.372461
1419	BRCA2	0.331682	0.164015
1420	BRCC3	0.0416764	0.522007
1421	BRD1	-0.216558	0.525746
1422	BRD2	0.0742696	0.707484
1423	BRD3	0.0959646	0.616761
1424	BRD3OS	0.210775	0.338429
1425	BRD4	0.152512	0.429853
1426	BRD7	-0.235893	0.454715
1427	BRD8	-0.0587372	0.543491
1428	BRD9	0.202865	0.381389
1429	BRF1	0.212768	0.300889
1430	BRF2	-0.096737	0.393886
1431	BRI3	-0.0114178	0.573337
1432	BRI3BP	0.302588	0.494395
1433	BRICD5	0.244965	0.489356
1434	BRINP1	0.20008	0.612418
1435	BRINP2	0.111078	0.0479256
1436	BRIP1	0.27115	0.21091
1437	BRIX1	0.0458592	0.442426
1438	BRK1	-0.0860668	0.844769
1439	BRMS1	-0.0906767	0.612445
1440	BRMS1L	-0.0471874	0.300494
1441	BROX	-0.0763811	0.537155
1442	BRPF1	0.116259	0.377074
1443	BRPF3	-0.045697	0.593513
1444	BRSK1	0.091404	0.633584
1445	BRSK2	0.325891	0.778902
1446	BRWD1	0.14667	0.373666
1447	BRWD3	-0.0341892	0.360343
1448	BSCL2	-0.00701379	0.172022
1449	BSDC1	-0.171093	0.58796
1450	BSG	-0.146149	0.863502
1451	BSN	0.481633	0.139805
1452	BSPRY	0.0375713	0.54711
1453	BST1	0.406914	0.249409
1454	BST2	0.463273	1.13192
1455	BTAF1	-0.100561	0.719161
1456	BTBD1	0.185014	0.488421
1457	BTBD10	-0.0994587	0.342603
1458	BTBD16	-0.135763	0.215344
1459	BTBD18	-0.0748242	0.0600692
1460	BTBD19	0.576262	0.288439
1461	BTBD2	0.00783453	0.575596
1462	BTBD3	0.329508	0.479578
1463	BTBD6	0.0909768	0.657555
1464	BTBD7	0.187499	0.370597
1465	BTBD8	-0.00545357	0.302453
1466	BTBD9	-0.0831717	0.392706
1467	BTC	0.00869011	0.379178
1468	BTD	0.297552	0.400917
1469	BTF3	-0.0871591	0.762361
1470	BTF3L4	-0.00862092	0.420326
1471	BTG1	0.0593551	0.669
1472	BTG2	0.189633	1.27683
1473	BTG3	0.368446	0.706665
1474	BTK	0.43221	0.363414
1475	BTLA	0.293612	0.257689
1476	BTN2A1	0.285708	0.436032
1477	BTN2A2	0.480054	0.367013
1478	BTN3A1	0.280497	0.609095
1479	BTN3A2	0.401213	0.649012
1480	BTN3A3	0.340471	0.525234
1481	BTNL8	-0.121276	0.0386124
1482	BTNL9	0.222099	0.384705
1483	BTRC	-0.0600733	0.503839
1484	BUB1	0.449208	0.513585
1485	BUB1B	0.527838	0.435309
1486	BUB3	0.166232	0.486937
1487	BUD13	0.0487012	0.4512
1488	BUD23	-0.0268822	0.554612
1489	BUD31	-0.410164	0.572541
1490	BYSL	0.0199306	0.543684
1491	BZW1	0.0967273	0.547289
1492	BZW2	0.141132	0.688572
1493	C10orf143	0.0455176	0.25924
1494	C10orf55	-0.0908897	0.0670556
1495	C10orf67	0.0105669	0.0357003
1496	C10orf88	-0.0225782	0.321013
1497	C11orf16	-0.156972	0.17086
1498	C11orf21	0.305338	0.192149
1499	C11orf24	-0.0103337	0.442931
1500	C11orf42		0.442931
1501	C11orf54	-0.177265	0.422413
[truncated: 14,557 more rows]
