# Supplementary material for: Predicting gene expression from whole slide images in prostate cancer using deep learning
Source: Research Square preprint supplement (doi:10.21203/rs.3.rs-8770716/v1), 2026-02-04
Supplement: Supplementary file 3 [file a9a0af90cb381c3aeb22cb73.xlsx]

## Sheet: Top100_BP
Pathway	Pearson_Correlation
GOBP_CAVEOLA_ASSEMBLY	0.822059
GOBP_REGULATION_OF_CARDIAC_MUSCLE_CONTRACTION_BY_CALCIUM_ION_SIGNALING	0.758183
GOBP_REGULATION_OF_CARDIAC_MUSCLE_CONTRACTION_BY_REGULATION_OF_THE_RELEASE_OF_SEQUESTERED_CALCIUM_ION	0.740289
GOBP_LIPID_METABOLIC_PROCESS	0.733765
GOBP_REGULATION_OF_RELEASE_OF_SEQUESTERED_CALCIUM_ION_INTO_CYTOSOL_BY_SARCOPLASMIC_RETICULUM	0.731322
GOBP_PLASMA_MEMBRANE_ORGANIZATION	0.724726
GOBP_CELLULAR_LIPID_METABOLIC_PROCESS	0.723172
GOBP_FATTY_ACID_OMEGA_OXIDATION	0.711212
GOBP_FATTY_ACID_METABOLIC_PROCESS	0.704139
GOBP_PLASMA_MEMBRANE_REPAIR	0.704041
GOBP_CARDIAC_MUSCLE_CONTRACTION	0.703248
GOBP_NEGATIVE_REGULATION_OF_MONOATOMIC_ION_TRANSPORT	0.701568
GOBP_MESENCHYME_MIGRATION	0.699505
GOBP_CELL_COMMUNICATION_BY_ELECTRICAL_COUPLING_INVOLVED_IN_CARDIAC_CONDUCTION	0.697637
GOBP_REGULATION_OF_LUTEINIZING_HORMONE_SECRETION	0.69637
GOBP_REGULATION_OF_CARDIAC_MUSCLE_CONTRACTION	0.69588
GOBP_ORGANIC_HYDROXY_COMPOUND_METABOLIC_PROCESS	0.694359
GOBP_ALCOHOL_METABOLIC_PROCESS	0.691495
GOBP_MONOCARBOXYLIC_ACID_METABOLIC_PROCESS	0.691162
GOBP_VENTRICULAR_CARDIAC_MUSCLE_TISSUE_DEVELOPMENT	0.689944
GOBP_HEART_PROCESS	0.686106
GOBP_CARDIAC_LEFT_VENTRICLE_MORPHOGENESIS	0.685625
GOBP_MUSCLE_CONTRACTION	0.684948
GOBP_AMIDE_METABOLIC_PROCESS	0.684838
GOBP_LUNG_VASCULATURE_DEVELOPMENT	0.683588
GOBP_ISOPRENOID_METABOLIC_PROCESS	0.682891
GOBP_LIPID_BIOSYNTHETIC_PROCESS	0.681625
GOBP_CARDIAC_VENTRICLE_MORPHOGENESIS	0.67955
GOBP_TONIC_SMOOTH_MUSCLE_CONTRACTION	0.677608
GOBP_REGULATION_OF_STRIATED_MUSCLE_CONTRACTION	0.676188
GOBP_ACTIN_FILAMENT_DEPOLYMERIZATION	0.675808
GOBP_NEGATIVE_REGULATION_OF_ACTIN_FILAMENT_POLYMERIZATION	0.675382
GOBP_NEGATIVE_REGULATION_OF_TRANSPORT	0.674492
GOBP_NEGATIVE_REGULATION_OF_MONOATOMIC_ION_TRANSMEMBRANE_TRANSPORT	0.674405
GOBP_MUSCLE_SYSTEM_PROCESS	0.674398
GOBP_STEROL_METABOLIC_PROCESS	0.674176
GOBP_ORGAN_INDUCTION	0.672794
GOBP_REGULATION_OF_HEART_CONTRACTION	0.672685
GOBP_CELLULAR_LIPID_CATABOLIC_PROCESS	0.670985
GOBP_CELLULAR_COMPONENT_ASSEMBLY_INVOLVED_IN_MORPHOGENESIS	0.669415
GOBP_REGULATION_OF_DOPAMINE_SECRETION	0.669261
GOBP_STRIATED_MUSCLE_CONTRACTION	0.66798
GOBP_NEGATIVE_REGULATION_OF_SMOOTH_MUSCLE_CELL_MIGRATION	0.667831
GOBP_ACTIN_MEDIATED_CELL_CONTRACTION	0.666801
GOBP_CARDIAC_MUSCLE_TISSUE_MORPHOGENESIS	0.66659
GOBP_REGULATION_OF_BLOOD_CIRCULATION	0.665871
GOBP_DOPAMINE_SECRETION	0.665254
GOBP_VENTRICULAR_CARDIAC_MUSCLE_TISSUE_MORPHOGENESIS	0.664713
GOBP_VENTRAL_SPINAL_CORD_INTERNEURON_DIFFERENTIATION	0.66439
GOBP_REGULATION_OF_PROTEIN_DEPOLYMERIZATION	0.662041
GOBP_CARDIAC_CONDUCTION	0.661746
GOBP_REGULATION_OF_SYSTEM_PROCESS	0.661323
GOBP_VASCULAR_ASSOCIATED_SMOOTH_MUSCLE_CELL_PROLIFERATION	0.660329
GOBP_MONOCARBOXYLIC_ACID_BIOSYNTHETIC_PROCESS	0.659648
GOBP_VENOUS_BLOOD_VESSEL_DEVELOPMENT	0.658162
GOBP_REGULATION_OF_MESODERMAL_CELL_DIFFERENTIATION	0.657986
GOBP_SARCOPLASMIC_RETICULUM_CALCIUM_ION_TRANSPORT	0.657917
GOBP_LYTIC_VACUOLE_ORGANIZATION	0.656312
GOBP_REGULATION_OF_MUSCLE_CONTRACTION	0.655512
GOBP_NEURON_MIGRATION	0.655073
GOBP_LIPID_CATABOLIC_PROCESS	0.654819
GOBP_MEMBRANE_LIPID_METABOLIC_PROCESS	0.654391
GOBP_FATTY_ACID_BIOSYNTHETIC_PROCESS	0.654106
GOBP_REGULATION_OF_CARDIAC_CONDUCTION	0.652006
GOBP_AV_NODE_CELL_TO_BUNDLE_OF_HIS_CELL_COMMUNICATION	0.651823
GOBP_CARDIAC_VENTRICLE_DEVELOPMENT	0.65024
GOBP_REGULATION_OF_DNA_TEMPLATED_DNA_REPLICATION_INITIATION	0.650232
GOBP_CIRCULATORY_SYSTEM_PROCESS	0.649477
GOBP_NEGATIVE_REGULATION_OF_VASCULAR_ASSOCIATED_SMOOTH_MUSCLE_CELL_MIGRATION	0.648727
GOBP_NEGATIVE_REGULATION_OF_ACTIN_FILAMENT_DEPOLYMERIZATION	0.648594
GOBP_REGULATION_OF_TRANS_SYNAPTIC_SIGNALING	0.64849
GOBP_NEGATIVE_REGULATION_OF_GLIAL_CELL_MIGRATION	0.647555
GOBP_STEROID_METABOLIC_PROCESS	0.647169
GOBP_POSITIVE_REGULATION_OF_BLOOD_VESSEL_REMODELING	0.646823
GOBP_REGULATION_OF_ACTION_POTENTIAL	0.646407
GOBP_NEGATIVE_REGULATION_OF_TRANSMEMBRANE_TRANSPORT	0.646301
GOBP_STRIATED_MUSCLE_CELL_DEVELOPMENT	0.646143
GOBP_SMOOTH_MUSCLE_CONTRACTION	0.645658
GOBP_REGULATION_OF_POTASSIUM_ION_TRANSPORT	0.645542
GOBP_NEGATIVE_REGULATION_OF_TRANSPORTER_ACTIVITY	0.645516
GOBP_CELLULAR_CATABOLIC_PROCESS	0.644768
GOBP_VENTRICULAR_CARDIAC_MUSCLE_CELL_ACTION_POTENTIAL	0.644453
GOBP_ORGANIC_ACID_METABOLIC_PROCESS	0.644349
GOBP_CARDIAC_CELL_DEVELOPMENT	0.643928
GOBP_POSITIVE_REGULATION_OF_VASCULAR_ASSOCIATED_SMOOTH_MUSCLE_CELL_PROLIFERATION	0.643506
GOBP_MEMBRANE_LIPID_CATABOLIC_PROCESS	0.642493
GOBP_PEPTIDE_METABOLIC_PROCESS	0.642353
GOBP_ENSHEATHMENT_OF_NEURONS	0.642118
GOBP_HINDBRAIN_TANGENTIAL_CELL_MIGRATION	0.640479
GOBP_CHEMICAL_HOMEOSTASIS	0.640011
GOBP_BASE_EXCISION_REPAIR_GAP_FILLING	0.639614
GOBP_ORGANIC_ACID_BIOSYNTHETIC_PROCESS	0.639436
GOBP_NEGATIVE_REGULATION_OF_ION_TRANSMEMBRANE_TRANSPORTER_ACTIVITY	0.63937
GOBP_MUSCLE_CELL_DEVELOPMENT	0.639228
GOBP_REGULATION_OF_CELLULAR_RESPONSE_TO_VASCULAR_ENDOTHELIAL_GROWTH_FACTOR_STIMULUS	0.638952
GOBP_POSITIVE_REGULATION_OF_DOPAMINE_SECRETION	0.638889
GOBP_PROTEIN_LOCALIZATION_TO_CELL_SURFACE	0.638449
GOBP_MONOATOMIC_ION_HOMEOSTASIS	0.63809
GOBP_VASCULAR_ENDOTHELIAL_GROWTH_FACTOR_SIGNALING_PATHWAY	0.637648
GOBP_NUCLEOSIDE_MONOPHOSPHATE_BIOSYNTHETIC_PROCESS	0.63746

## Sheet: Top100_MF
Pathway	Pearson_Correlation
GOMF_ALDEHYDE_DEHYDROGENASE_NAD_P_PLUS_ACTIVITY	0.696445
GOMF_IRON_ION_BINDING	0.683717
GOMF_GAP_JUNCTION_CHANNEL_ACTIVITY_INVOLVED_IN_CARDIAC_CONDUCTION_ELECTRICAL_COUPLING	0.673183
GOMF_CALCIUM_DEPENDENT_PROTEIN_BINDING	0.652739
GOMF_STEROID_HORMONE_BINDING	0.63559
GOMF_TRANSMEMBRANE_TRANSPORTER_BINDING	0.633724
GOMF_GROWTH_FACTOR_RECEPTOR_BINDING	0.630507
GOMF_RNA_POLYMERASE_ACTIVITY	0.628536
GOMF_EXONUCLEASE_ACTIVITY_ACTIVE_WITH_EITHER_RIBO_OR_DEOXYRIBONUCLEIC_ACIDS_AND_PRODUCING_5_PHOSPHOMONOESTERS	0.627705
GOMF_DNA_N_GLYCOSYLASE_ACTIVITY	0.626301
GOMF_CHEMOREPELLENT_ACTIVITY	0.621547
GOMF_INSULIN_LIKE_GROWTH_FACTOR_I_BINDING	0.620514
GOMF_TROPOMYOSIN_BINDING	0.617103
GOMF_3_CHLOROALLYL_ALDEHYDE_DEHYDROGENASE_ACTIVITY	0.616821
GOMF_NEUROTROPHIN_RECEPTOR_BINDING	0.615738
GOMF_OXIDOREDUCTASE_ACTIVITY_ACTING_ON_PAIRED_DONORS_WITH_INCORPORATION_OR_REDUCTION_OF_MOLECULAR_OXYGEN_REDUCED_IRON_SULFUR_PROTEIN_AS_ONE_DONOR_AND_INCORPORATION_OF_ONE_ATOM_OF_OXYGEN	0.61382
GOMF_TRANSPORTER_REGULATOR_ACTIVITY	0.611067
GOMF_MUSCLE_ALPHA_ACTININ_BINDING	0.602936
GOMF_NUCLEOSIDE_KINASE_ACTIVITY	0.602872
GOMF_CHEMOATTRACTANT_ACTIVITY	0.602385
GOMF_ACID_PHOSPHATASE_ACTIVITY	0.600867
GOMF_VASCULAR_ENDOTHELIAL_GROWTH_FACTOR_RECEPTOR_2_BINDING	0.596517
GOMF_GLYCERALDEHYDE_3_PHOSPHATE_DEHYDROGENASE_NADPLUS_NON_PHOSPHORYLATING_ACTIVITY	0.594223
GOMF_NITRIC_OXIDE_SYNTHASE_BINDING	0.593687
GOMF_3_5_EXONUCLEASE_ACTIVITY	0.592342
GOMF_SNORNA_BINDING	0.589338
GOMF_5_DEOXYRIBOSE_5_PHOSPHATE_LYASE_ACTIVITY	0.58931
GOMF_CATALYTIC_ACTIVITY_ACTING_ON_A_TRNA	0.587486
GOMF_TRANSFORMING_GROWTH_FACTOR_BETA_RECEPTOR_ACTIVITY	0.586672
GOMF_CATALYTIC_ACTIVITY_ACTING_ON_A_NUCLEIC_ACID	0.586647
GOMF_TETRAPYRROLE_BINDING	0.58331
GOMF_TRNA_PSEUDOURIDINE_SYNTHASE_ACTIVITY	0.58089
GOMF_PHOSPHATIDYLINOSITOL_3_KINASE_BINDING	0.580828
GOMF_EXONUCLEASE_ACTIVITY	0.580539
GOMF_DNA_NUCLEASE_ACTIVITY	0.579982
GOMF_SEMAPHORIN_RECEPTOR_BINDING	0.576105
GOMF_DNA_EXONUCLEASE_ACTIVITY	0.575622
GOMF_OXIDOREDUCTASE_ACTIVITY_ACTING_ON_OTHER_NITROGENOUS_COMPOUNDS_AS_DONORS	0.574476
GOMF_TRANSMEMBRANE_RECEPTOR_PROTEIN_KINASE_ACTIVITY	0.573207
GOMF_NUCLEOSIDE_DIPHOSPHATE_KINASE_ACTIVITY	0.572417
GOMF_NUCLEASE_ACTIVITY	0.570912
GOMF_TRANSFERASE_ACTIVITY_TRANSFERRING_ALKYL_OR_ARYL_OTHER_THAN_METHYL_GROUPS	0.57071
GOMF_CYTOSKELETAL_PROTEIN_BINDING	0.569564
GOMF_ADENYLATE_CYCLASE_BINDING	0.569255
GOMF_RNA_METHYLTRANSFERASE_ACTIVITY	0.569235
GOMF_CATALYTIC_ACTIVITY_ACTING_ON_DNA	0.56774
GOMF_ACYL_COA_OXIDASE_ACTIVITY	0.566503
GOMF_BMP_RECEPTOR_BINDING	0.566473
GOMF_OXIDOREDUCTASE_ACTIVITY	0.566386
GOMF_PROSTANOID_RECEPTOR_ACTIVITY	0.564634
GOMF_3_5_DNA_EXONUCLEASE_ACTIVITY	0.559007
GOMF_CATALYTIC_ACTIVITY_ACTING_ON_RNA	0.558755
GOMF_HYDROLASE_ACTIVITY_HYDROLYZING_O_GLYCOSYL_COMPOUNDS	0.55867
GOMF_OXIDOREDUCTASE_ACTIVITY_ACTING_ON_CH_OH_GROUP_OF_DONORS	0.558659
GOMF_VASCULAR_ENDOTHELIAL_GROWTH_FACTOR_RECEPTOR_BINDING	0.55757
GOMF_NUCLEOBASE_CONTAINING_COMPOUND_KINASE_ACTIVITY	0.555053
GOMF_PLATELET_DERIVED_GROWTH_FACTOR_RECEPTOR_BINDING	0.554815
GOMF_INTEGRIN_BINDING_INVOLVED_IN_CELL_MATRIX_ADHESION	0.553556
GOMF_CELL_MATRIX_ADHESION_MEDIATOR_ACTIVITY	0.551931
GOMF_HORMONE_BINDING	0.550018
GOMF_RIBOSOMAL_LARGE_SUBUNIT_BINDING	0.549465
GOMF_TRANSFORMING_GROWTH_FACTOR_BETA_RECEPTOR_BINDING	0.548463
GOMF_TRANSMEMBRANE_RECEPTOR_PROTEIN_TYROSINE_KINASE_ACTIVITY	0.544683
GOMF_TRANSFERASE_ACTIVITY_TRANSFERRING_NITROGENOUS_GROUPS	0.543816
GOMF_CO_RECEPTOR_BINDING	0.542473
GOMF_MISFOLDED_PROTEIN_BINDING	0.542364
GOMF_HISTONE_H4K20_METHYLTRANSFERASE_ACTIVITY	0.542025
GOMF_METALLOENDOPEPTIDASE_INHIBITOR_ACTIVITY	0.541595
GOMF_EXTRACELLULAR_MATRIX_STRUCTURAL_CONSTITUENT_CONFERRING_TENSILE_STRENGTH	0.541132
GOMF_SPHINGOMYELIN_PHOSPHODIESTERASE_ACTIVITY	0.540867
GOMF_LIGASE_ACTIVITY	0.539963
GOMF_ISOMERASE_ACTIVITY	0.537969
GOMF_INTRAMOLECULAR_OXIDOREDUCTASE_ACTIVITY	0.536579
GOMF_1_4_ALPHA_OLIGOGLUCAN_PHOSPHORYLASE_ACTIVITY	0.534809
GOMF_ACTIN_BINDING	0.534643
GOMF_RETINOIC_ACID_RESPONSIVE_ELEMENT_BINDING	0.532959
GOMF_COPPER_ION_BINDING	0.531165
GOMF_SNRNA_BINDING	0.530863
GOMF_S_ADENOSYLMETHIONINE_DEPENDENT_METHYLTRANSFERASE_ACTIVITY	0.530329
GOMF_DIHYDROPYRIMIDINASE_ACTIVITY	0.530232
GOMF_GLYCEROL_TRANSMEMBRANE_TRANSPORTER_ACTIVITY	0.528125
GOMF_NUCLEAR_STEROID_RECEPTOR_ACTIVITY	0.527381
GOMF_RETINAL_BINDING	0.527178
GOMF_DNA_POLYMERASE_BINDING	0.526758
GOMF_G_PROTEIN_BETA_GAMMA_SUBUNIT_COMPLEX_BINDING	0.525364
GOMF_DNA_TOPOISOMERASE_ACTIVITY	0.524522
GOMF_LIGASE_ACTIVITY_FORMING_CARBON_OXYGEN_BONDS	0.524404
GOMF_NITRITE_REDUCTASE_ACTIVITY	0.523703
GOMF_PHOSPHATIDYLINOSITOL_3_4_5_TRISPHOSPHATE_3_PHOSPHATASE_ACTIVITY	0.522537
GOMF_TRNA_CYTIDINE_METHYLTRANSFERASE_ACTIVITY	0.522159
GOMF_N_ACETYLGLUCOSAMINE_6_O_SULFOTRANSFERASE_ACTIVITY	0.52197
GOMF_VITAMIN_BINDING	0.520407
GOMF_TRNA_GUANINE_METHYLTRANSFERASE_ACTIVITY	0.518543
GOMF_GLYCEROL_CHANNEL_ACTIVITY	0.518191
GOMF_TRANSFERASE_ACTIVITY_TRANSFERRING_ONE_CARBON_GROUPS	0.51774
GOMF_RNA_POLYMERASE_I_ACTIVITY	0.517681
GOMF_STRUCTURAL_CONSTITUENT_OF_MUSCLE	0.517398
GOMF_INTEGRIN_BINDING	0.516963
GOMF_ALPHA_ACTININ_BINDING	0.516251
GOMF_ISOPRENOID_BINDING	0.513807

## Sheet: Top100_CC
Pathway	Pearson_Correlation
GOCC_CAVEOLA	0.701103
GOCC_SCHMIDT_LANTERMAN_INCISURE	0.684554
GOCC_COMPACT_MYELIN	0.68338
GOCC_SARCOLEMMA	0.680824
GOCC_SMOOTH_ENDOPLASMIC_RETICULUM	0.675187
GOCC_DYSTROGLYCAN_COMPLEX	0.671624
GOCC_T_TUBULE	0.667625
GOCC_SARCOPLASMIC_RETICULUM_MEMBRANE	0.666257
GOCC_SARCOPLASMIC_RETICULUM	0.665315
GOCC_DYSTROPHIN_ASSOCIATED_GLYCOPROTEIN_COMPLEX	0.665004
GOCC_GLYCOPROTEIN_COMPLEX	0.664417
GOCC_PLASMA_MEMBRANE_RAFT	0.662091
GOCC_CELL_DIVISION_SITE	0.65209
GOCC_HETEROCHROMATIN	0.648243
GOCC_CONTRACTILE_MUSCLE_FIBER	0.645731
GOCC_COLLAGEN_TYPE_IV_TRIMER	0.645408
GOCC_CELL_POLE	0.637751
GOCC_PLATELET_ALPHA_GRANULE_MEMBRANE	0.634203
GOCC_CELL_TIP	0.633075
GOCC_ACTOMYOSIN	0.630599
GOCC_JUNCTIONAL_SARCOPLASMIC_RETICULUM_MEMBRANE	0.625231
GOCC_LATE_ENDOSOME_MEMBRANE	0.623671
GOCC_LATE_ENDOSOME	0.621016
GOCC_STRIATED_MUSCLE_THIN_FILAMENT	0.619388
GOCC_CLATHRIN_COATED_VESICLE	0.615568
GOCC_PRESYNAPTIC_MEMBRANE	0.614842
GOCC_90S_PRERIBOSOME	0.613719
GOCC_EARLY_ENDOSOME_LUMEN	0.612756
GOCC_MEMBRANE_MICRODOMAIN	0.612068
GOCC_ACTIN_FILAMENT_BUNDLE	0.610542
GOCC_CELL_PROJECTION_MEMBRANE	0.60745
GOCC_ACTIN_CYTOSKELETON	0.604901
GOCC_EXTRINSIC_COMPONENT_OF_CYTOPLASMIC_SIDE_OF_PLASMA_MEMBRANE	0.601606
GOCC_ENDOCYTIC_VESICLE_MEMBRANE	0.600555
GOCC_PLASMA_MEMBRANE_REGION	0.5989
GOCC_A_BAND	0.598252
GOCC_PLASMA_MEMBRANE_PROTEIN_COMPLEX	0.598112
GOCC_MATRIX_SIDE_OF_MITOCHONDRIAL_INNER_MEMBRANE	0.597955
GOCC_PLATELET_ALPHA_GRANULE	0.594667
GOCC_MICROBODY	0.59409
GOCC_I_BAND	0.591987
GOCC_SARCOPLASM	0.591691
GOCC_MULTIVESICULAR_BODY	0.587091
GOCC_LEADING_EDGE_MEMBRANE	0.586995
GOCC_CLATHRIN_COATED_VESICLE_MEMBRANE	0.585856
GOCC_CLATHRIN_COATED_ENDOCYTIC_VESICLE	0.584915
GOCC_MICROBODY_LUMEN	0.584699
GOCC_NEURON_SPINE	0.58431
GOCC_NUCLEOLUS	0.583769
GOCC_EXTRINSIC_COMPONENT_OF_MEMBRANE	0.582871
GOCC_NUCLEAR_OUTER_MEMBRANE_ENDOPLASMIC_RETICULUM_MEMBRANE_NETWORK	0.580282
GOCC_NETWORK_FORMING_COLLAGEN_TRIMER	0.579633
GOCC_GAMMA_SECRETASE_COMPLEX	0.578504
GOCC_MHC_CLASS_I_PROTEIN_COMPLEX	0.578224
GOCC_VACUOLAR_MEMBRANE	0.577482
GOCC_PRE_SNORNP_COMPLEX	0.577204
GOCC_XY_BODY	0.577151
GOCC_LUMENAL_SIDE_OF_MEMBRANE	0.576842
GOCC_NUCLEOID	0.575706
GOCC_FASCIA_ADHERENS	0.574541
GOCC_LAMELLIPODIUM_MEMBRANE	0.574162
GOCC_MYOFILAMENT	0.567202
GOCC_TRANSPORT_VESICLE	0.566395
GOCC_SUPRAMOLECULAR_POLYMER	0.564243
GOCC_FANCONI_ANAEMIA_NUCLEAR_COMPLEX	0.564146
GOCC_ENDONUCLEASE_COMPLEX	0.563728
GOCC_PRESYNAPSE	0.563231
GOCC_INO80_COMPLEX	0.562021
GOCC_TRANS_GOLGI_NETWORK_TRANSPORT_VESICLE	0.559607
GOCC_LAMELLIPODIUM	0.559288
GOCC_BASEMENT_MEMBRANE_COLLAGEN_TRIMER	0.558825
GOCC_ENDOPLASMIC_RETICULUM_PROTEIN_CONTAINING_COMPLEX	0.558082
GOCC_PRERIBOSOME	0.557988
GOCC_SMALL_SUBUNIT_PROCESSOME	0.556212
GOCC_VACUOLE	0.555509
GOCC_CELL_LEADING_EDGE	0.55518
GOCC_ACTIN_BASED_CELL_PROJECTION	0.554852
GOCC_CLATHRIN_COATED_ENDOCYTIC_VESICLE_MEMBRANE	0.554072
GOCC_ORGANELLE_SUBCOMPARTMENT	0.553855
GOCC_CELL_CELL_JUNCTION	0.552314
GOCC_SYNAPTIC_MEMBRANE	0.550848
GOCC_BOX_C_D_RNP_COMPLEX	0.550157
GOCC_EXOCYTIC_VESICLE	0.550056
GOCC_RNA_POLYMERASE_III_COMPLEX	0.549916
GOCC_EXTRINSIC_COMPONENT_OF_PLASMA_MEMBRANE	0.547103
GOCC_PRONUCLEUS	0.547091
GOCC_CMG_COMPLEX	0.54613
GOCC_COLLAGEN_TRIMER	0.545454
GOCC_COPI_COATED_VESICLE	0.545029
GOCC_MANNOSYLTRANSFERASE_COMPLEX	0.544178
GOCC_ZONA_PELLUCIDA_RECEPTOR_COMPLEX	0.544144
GOCC_NEURON_PROJECTION	0.543999
GOCC_GOLGI_TRANS_CISTERNA	0.543393
GOCC_M_BAND	0.542938
GOCC_CLEAVAGE_FURROW	0.5409
GOCC_TRANSLOCON_COMPLEX	0.540175
GOCC_ACTIN_FILAMENT	0.538843
GOCC_ENDOPLASMIC_RETICULUM_GOLGI_INTERMEDIATE_COMPARTMENT_MEMBRANE	0.538674
GOCC_NUCLEAR_UBIQUITIN_LIGASE_COMPLEX	0.538238
GOCC_U1_SNRNP	0.53748

## Sheet: Top100_KEGG
Pathway	Pearson_Correlation
KEGG_MEDICUS_REFERENCE_TGF_BETA_SIGNALING_PATHWAY	0.699073
KEGG_MEDICUS_REFERENCE_BREAK_INDUCED_REPLICATION	0.655898
KEGG_MEDICUS_REFERENCE_GLYCOGEN_DEGRADATION	0.655356
KEGG_MEDICUS_REFERENCE_GF_RTK_RAS_PI3K_SIGNALING_PATHWAY	0.651952
KEGG_MEDICUS_REFERENCE_BASE_EXCISION_AND_STRAND_CLEAVAGE_BY_MONOFUNCTIONAL_GLYCOSYLASE	0.65156
KEGG_MEDICUS_REFERENCE_CARDIAC_TYPE_VGCC_RYR_SIGNALING	0.643311
KEGG_MEDICUS_REFERENCE_HIF_1_SIGNALING_PATHWAY	0.631662
KEGG_MEDICUS_REFERENCE_GF_RTK_PI3K_SIGNALING_PATHWAY	0.631434
KEGG_MEDICUS_REFERENCE_GF_RTK_RAS_ERK_SIGNALING_PATHWAY	0.630912
KEGG_MEDICUS_REFERENCE_REGULATION_OF_GF_RTK_RAS_ERK_SIGNALING_UBIQUITINATION_OF_RTK_BY_CBL	0.608522
KEGG_MEDICUS_ENV_FACTOR_TCDD_TO_AHR_SIGNALING_PATHWAY	0.607491
KEGG_MEDICUS_REFERENCE_FANCONI_ANEMIA_PATHWAY	0.596897
KEGG_MEDICUS_REFERENCE_MODIFYING_OF_CONDENSIN_I_SUBUNITS	0.589785
KEGG_MEDICUS_REFERENCE_FGF_FGFR_RAS_ERK_SIGNALING_PATHWAY	0.582369
KEGG_MEDICUS_REFERENCE_TRAIP_DEPENDENT_REPLISOME_DISASSEMBLY	0.581821
KEGG_MEDICUS_REFERENCE_ITGA_B_RHOGAP_RHOA_SIGNALING_PATHWAY	0.5736
KEGG_MEDICUS_REFERENCE_ITGA_B_FAK_CDC42_SIGNALING_PATHWAY	0.571484
KEGG_MEDICUS_PATHOGEN_HCMV_US27_TO_CXCR4_GNB_G_PLCB_PKC_SIGNALING_PATHWAY	0.569408
KEGG_MEDICUS_REFERENCE_ITGA_B_RHOGEF_RHOA_SIGNALING_PATHWAY	0.565505
KEGG_MEDICUS_REFERENCE_PLASMIN_MEDIATED_ACTIVATION_OF_LATENT_TGF_BETA	0.562087
KEGG_MEDICUS_REFERENCE_SKELETAL_TYPE_VGCC_RYR_SIGNALING	0.56074
KEGG_MEDICUS_REFERENCE_DNA_REPLICATION_LICENSING	0.55586
KEGG_MEDICUS_REFERENCE_THYROID_HORMONE_SIGNALING_PATHWAY	0.552537
KEGG_MEDICUS_REFERENCE_CXCR4_GNB_G_PLCB_PKC_SIGNALING_PATHWAY	0.552469
KEGG_MEDICUS_ENV_FACTOR_DCE_TO_DNA_ADDUCTS	0.550304
KEGG_MEDICUS_REFERENCE_REGULATION_OF_SERCA	0.54743
KEGG_MEDICUS_REFERENCE_DNA_REPLICATION_TERMINATION	0.544756
KEGG_MEDICUS_REFERENCE_ITGA_B_TALIN_VINCULIN_SIGNALING_PATHWAY	0.542436
KEGG_MEDICUS_REFERENCE_ITGA_B_FAK_RAC_SIGNALING_PATHWAY	0.542011
KEGG_MEDICUS_REFERENCE_N_GLYCAN_PRECURSOR_BIOSYNTHESIS_ALG7_TO_ALG11	0.536768
KEGG_MEDICUS_REFERENCE_TGFA_EGFR_PLCG_PKC_SIGNALING_PATHWAY	0.534119
KEGG_MEDICUS_REFERENCE_NUCLEAR_INITIATED_ESTROGEN_SIGNALING_PATHWAY	0.530385
KEGG_MEDICUS_REFERENCE_RTK_PLCG_ITPR_SIGNALING_PATHWAY	0.521599
KEGG_MEDICUS_REFERENCE_AUTOPHAGOSOME_AND_LYSOSOME_FUSION_TETHERING_FACTOR	0.521409
KEGG_MEDICUS_REFERENCE_GPCR_PLCB_ITPR_SIGNALING_PATHWAY	0.520849
KEGG_MEDICUS_REFERENCE_RECRUITMENT_AND_FORMATION_OF_THE_MCC	0.520733
KEGG_MEDICUS_REFERENCE_KEAP1_NRF2_SIGNALING_PATHWAY	0.520541
KEGG_MEDICUS_VARIANT_MUTATION_ACTIVATED_USP8_TO_EGFR_ERK_ACTH_SIGNALING_PATHWAY	0.518323
KEGG_MEDICUS_REFERENCE_NUCLEAR_INITIATED_PROGESTERONE_SIGNALING_PATHWAY	0.515944
KEGG_MEDICUS_REFERENCE_ASSEMBLY_AND_TRAFFICKING_OF_TELOMERASE	0.514695
KEGG_MEDICUS_PATHOGEN_EBV_EBNA3C_TO_CELL_CYCLE_G1_S_N00484	0.513662
KEGG_MEDICUS_REFERENCE_SPINDLE_ASSEMBLY_CHECKPOINT_SIGNALING	0.510422
KEGG_MEDICUS_REFERENCE_CA2_CAM_VGCC_RYR_SIGNALING_PATHWAY	0.508367
KEGG_MEDICUS_REFERENCE_GPI_ANCHOR_BIOSYNTHESIS	0.504796
KEGG_MEDICUS_REFERENCE_BASE_EXCISION_AND_STRAND_CLEAVAGE_BY_NEIL_GLYCOSYLASE	0.504171
KEGG_MEDICUS_REFERENCE_N_GLYCAN_PRECURSOR_BIOSYNTHESIS_GLC_6P_TO_MAN_P_DOL	0.502629
KEGG_MEDICUS_ENV_FACTOR_NICOTINE_TO_JAK_STAT_SIGNALING_PATHWAY	0.495221
KEGG_MEDICUS_REFERENCE_TSH_DUOX2_TG_SIGNALING_PATHWAY	0.495184
KEGG_MEDICUS_REFERENCE_WNT_SIGNALING_MODULATION_LGR_RSPO	0.493487
KEGG_MEDICUS_REFERENCE_PRE_IC_FORMATION	0.493309
KEGG_MEDICUS_REFERENCE_CA2_CAM_CN_SIGNALING_PATHWAY	0.492215
KEGG_MEDICUS_PATHOGEN_EBV_EBNA3C_TO_P27_CELL_CYCLE_G1_S_N00264	0.491152
KEGG_MEDICUS_VARIANT_EML4_ALK_FUSION_KINASE_TO_JAK_STAT_SIGNALING_PATHWAY	0.490899
KEGG_MEDICUS_VARIANT_MUTATION_CAUSED_ABERRANT_ABETA_TO_26S_PROTEASOME_MEDIATED_PROTEIN_DEGRADATION	0.490611
KEGG_MEDICUS_REFERENCE_TLR7_9_IRF7_SIGNALING_PATHWAY	0.486877
KEGG_MEDICUS_REFERENCE_ITGA_B_RHOG_RAC_SIGNALING_PATHWAY	0.486775
KEGG_MEDICUS_REFERENCE_CXCR4_GNA12_13_RHO_SIGNALING_PATHWAY	0.486589
KEGG_MEDICUS_REFERENCE_TLR1_2_4_NFKB_SIGNALING_PATHWAY	0.483135
KEGG_MEDICUS_VARIANT_MUTATION_CAUSED_ABERRANT_HTT_TO_26S_PROTEASOME_MEDIATED_PROTEIN_DEGRADATION	0.482036
KEGG_MEDICUS_VARIANT_MUTATION_INACTIVATED_UBQLN2_TO_26S_PROTEASOME_MEDIATED_PROTEIN_DEGRADATION	0.481656
KEGG_MEDICUS_REFERENCE_26S_PROTEASOME_MEDIATED_PROTEIN_DEGRADATION	0.481564
KEGG_MEDICUS_VARIANT_MUTATION_INACTIVATED_VCP_TO_26S_PROTEASOME_MEDIATED_PROTEIN_DEGRADATION	0.481559
KEGG_MEDICUS_REFERENCE_PINK_PARKIN_MEDIATED_AUTOPHAGOSOME_FORMATION	0.475886
KEGG_MEDICUS_REFERENCE_TLR5_NFKB_SIGNALING_PATHWAY	0.475373
KEGG_MEDICUS_REFERENCE_CENPE_INTERACTION_WITH_NDC80_COMPLEX	0.475089
KEGG_MEDICUS_REFERENCE_BCR_PLCG_CALCINEURIN_SIGNALING_PATHWAY	0.474387
KEGG_MEDICUS_REFERENCE_TAC3_TACR3_PLC_PKC_SIGNALING_PATHWAY	0.47411
KEGG_MEDICUS_PATHOGEN_SALMONELLA_SOPE_E2_TO_NOD_NFKB_SIGNALING_PATHWAY	0.473938
KEGG_MEDICUS_REFERENCE_KISS1_KISS1R_PLCB_PKC_SIGNALING_PATHWAY	0.473807
KEGG_MEDICUS_VARIANT_SCRAPIE_CONFORMATION_PRPSC_TO_26S_PROTEASOME_MEDIATED_PROTEIN_DEGRADATION	0.471613
KEGG_MEDICUS_VARIANT_MUTATION_CAUSED_ABERRANT_SNCA_TO_26S_PROTEASOME_MEDIATED_PROTEIN_DEGRADATION	0.470626
KEGG_MEDICUS_PATHOGEN_EBV_LMP1_TO_PI3K_SIGNALING_PATHWAY	0.470104
KEGG_MEDICUS_REFERENCE_PKR_EIF2ALPHA_SIGNALING_PATHWAY	0.468895
KEGG_MEDICUS_REFERENCE_IL6_FAMILY_TO_JAK_STAT_SIGNALING_PATHWAY	0.467141
KEGG_MEDICUS_REFERENCE_CX3CR1_GNAI_AC_PKA_SIGNALING_PATHWAY	0.466132
KEGG_MEDICUS_VARIANT_MUTATION_CAUSED_ABERRANT_SOD1_TO_26S_PROTEASOME_MEDIATED_PROTEIN_DEGRADATION	0.465211
KEGG_MEDICUS_REFERENCE_TRANSCRIPTION_COUPLED_NER	0.462115
KEGG_MEDICUS_REFERENCE_COPI_VESICLE_FORMATION	0.461324
KEGG_MEDICUS_REFERENCE_BETA_OXIDATION	0.461267
KEGG_MEDICUS_REFERENCE_DISASSEMBLY_OF_MCC	0.461156
KEGG_MEDICUS_REFERENCE_CDC25_CELL_CYCLE_G2_M	0.460668
KEGG_MEDICUS_REFERENCE_TETHERING_OF_LATE_ENDOSOMES_AND_LYSOSOMES	0.46007
KEGG_MEDICUS_REFERENCE_VALINE_DEGRADATION	0.459004
KEGG_MEDICUS_REFERENCE_AHR_SIGNALING_PATHWAY	0.458857
KEGG_MEDICUS_PATHOGEN_HTLV_1_P12_TO_JAK_STAT_SIGNALING_PATHWAY	0.458664
KEGG_MEDICUS_REFERENCE_REGULATION_OF_FIBRINOLYTIC_SYSTEM_C1INH	0.457226
KEGG_MEDICUS_REFERENCE_REGULATION_OF_GF_RTK_RAS_ERK_SIGNALING_PATHWAY_ADAPTOR_PROTEINS	0.455573
KEGG_MEDICUS_VARIANT_AMPLIFIED_REL_TO_TRANSCRIPTION	0.454863
KEGG_MEDICUS_VARIANT_MUTATION_CAUSED_ABERRANT_SOD1_TO_PERK_ATF4_SIGNALING_PATHWAY	0.453945
KEGG_MEDICUS_REFERENCE_CCR5_GNB_G_PLCB_G_PKC_SIGNALING_PATHWAY	0.453386
KEGG_MEDICUS_REFERENCE_ANXA2_S100A10_REGULATED_ACTIN_CYTOSKELETON	0.452831
KEGG_MEDICUS_REFERENCE_NOD_NFKB_SIGNALING_PATHWAY	0.452474
KEGG_MEDICUS_REFERENCE_TRH_TRHR_PLCB_PKC_SIGNALING_PATHWAY	0.450381
KEGG_MEDICUS_VARIANT_AMPLIFIED_MYCN_TO_TRANSCRIPTIONAL_REPRESSION	0.449915
KEGG_MEDICUS_PATHOGEN_SHIGELLA_IPAH7.8_TO_NLRP3_INFLAMMASOME_SIGNALING_PATHWAY	0.446018
KEGG_MEDICUS_REFERENCE_PRNP_PI3K_NOX2_SIGNALING_PATHWAY	0.444242
KEGG_MEDICUS_REFERENCE_BLOOD_GROUP_H_O_ANTIGEN_TYPE_1_BIOSYNTHESIS	0.443365
KEGG_MEDICUS_REFERENCE_PTH_PTH1R_PKA_SIGNALING_PATHWAY	0.441366
KEGG_MEDICUS_REFERENCE_BMP_SIGNALING_PATHWAY_BMP_ANTAGONIST	0.440226
KEGG_MEDICUS_REFERENCE_EGF_JAK_STAT_SIGNALING_PATHWAY	0.440179
