# Supplementary material for: Predicting gene expression from whole slide images in prostate cancer using deep learning
Source: Research Square preprint supplement (doi:10.21203/rs.3.rs-8770716/v1), 2026-02-04
Supplement: Supplementary file 4 [file ed1787791d791e44b8d5ac0a.xlsx]

## Sheet: ProGENIE(ResNet50)
	gene	pcc	rmse
0	A1BG	0.00303107	0.0431353
1	A2M	0.11215	0.991537
2	A2ML1	0.176741	0.360785
3	A4GALT	0.275382	0.593865
4	AAAS	0.148931	0.23399
5	AACS	0.0390639	0.360605
6	AADAT	0.0569054	0.768503
7	AAGAB	0.0607902	0.28243
8	AAK1	-0.230486	0.487932
9	AAMDC	0.0986679	0.346633
10	AAMP	0.239501	0.251042
11	AANAT	0.0232858	0.0520443
12	AAR2	-0.203384	0.229692
13	AARD	0.340091	0.278546
14	AARS1	-0.0546176	0.408751
15	AARS2	0.095184	0.220012
16	AARSD1	-0.196622	0.202261
17	AASDH	0.124364	0.34201
18	AASDHPPT	0.0892332	0.36297
19	AASS	-0.158106	0.458254
20	AATBC	0.203986	0.368184
21	AATF	-0.0994046	0.267651
22	AATK	-0.10821	0.432246
23	ABAT	-0.107516	0.830004
24	ABCA1	0.222019	0.668852
25	ABCA10	0.202122	0.160155
26	ABCA12	-0.0431052	0.180834
27	ABCA13	0.0358958	0.0370294
28	ABCA2	0.0821731	0.485631
29	ABCA3	-0.0143225	0.500739
30	ABCA4	-0.0573992	0.0998548
31	ABCA5	0.118385	0.34378
32	ABCA6	0.255733	0.187586
33	ABCA7	-0.104586	0.423102
34	ABCA8	0.334032	0.579954
35	ABCA9	0.243568	0.198589
36	ABCB1	0.288741	0.593146
37	ABCB10	-0.0194763	0.428621
38	ABCB11	0.0687584	0.091193
39	ABCB4	0.229468	0.112196
40	ABCB5	0.103482	0.217767
41	ABCB6	-0.0252435	0.12952
42	ABCB7	0.0155168	0.285204
43	ABCB8	0.161665	0.353408
44	ABCB9	0.149447	0.149027
45	ABCC1	-0.05025	0.493071
46	ABCC10	0.233997	0.322398
47	ABCC11	0.0791454	1.00238
48	ABCC2	0.214001	0.0876138
49	ABCC3	0.212714	0.676866
50	ABCC4	-0.0389836	1.10564
51	ABCC5	0.135759	0.522805
52	ABCC6	-0.172802	0.488044
53	ABCC8	0.164016	0.450182
54	ABCC9	0.45373	0.554427
55	ABCD1	0.144207	0.359223
56	ABCD2	0.371275	0.117339
57	ABCD3	-0.0155964	0.43367
58	ABCD4	-0.17771	0.269304
59	ABCE1	0.0979402	0.462283
60	ABCF1	-0.0864022	0.286737
61	ABCF2	-0.0406912	0.302037
62	ABCF3	-0.218578	0.290861
63	ABCG1	0.00482135	0.568024
64	ABCG2	0.307173	0.56533
65	ABCG4	0.331703	0.0407658
66	ABCG5		0.0407658
67	ABCG8	-0.056158	0.0322987
68	ABHD1	0.210563	0.393356
69	ABHD10	0.0475297	0.40242
70	ABHD11	0.0972238	0.589695
71	ABHD12	-0.213581	0.678094
72	ABHD12B	-0.0193355	0.031905
73	ABHD13	-0.0640112	0.389505
74	ABHD14A	0.133347	0.579839
75	ABHD14B	0.149717	0.440683
76	ABHD15	0.0800593	0.368214
77	ABHD16A	0.0298749	0.156033
78	ABHD17A	0.0512193	0.359437
79	ABHD17B	0.0835022	0.51898
80	ABHD17C	0.0152972	0.588445
81	ABHD18	0.149828	0.321861
82	ABHD2	0.0386117	0.986033
83	ABHD3	0.0679038	0.459724
84	ABHD4	0.0726853	0.419484
85	ABHD5	0.0899498	0.287424
86	ABHD6	0.239277	0.330534
87	ABHD8	0.139574	0.427664
88	ABI1	0.00185465	0.363291
89	ABI2	0.0523182	0.321763
90	ABI3	0.010583	0.552596
91	ABI3BP	0.325575	0.582275
92	ABITRAM	0.182532	0.33433
93	ABL1	-0.0664589	0.449871
94	ABL2	-0.107167	0.288822
95	ABLIM1	0.281676	0.746428
96	ABLIM2	0.0282686	0.313344
97	ABLIM3	-0.114402	0.548409
98	ABO	0.176124	0.747759
99	ABR	-0.0272663	0.377392
100	ABRACL	-0.196112	0.674774
101	ABRAXAS1	0.351743	0.242846
102	ABRAXAS2	-0.0294093	0.330635
103	ABT1	-0.118816	0.280469
104	ABTB1	0.0190397	0.479895
105	ABTB2	0.0244117	0.582896
106	ACAA1	0.168814	0.400704
107	ACAA2	0.184166	0.576828
108	ACACA	0.14218	0.690087
109	ACACB	0.435639	0.491137
110	ACAD10	0.199338	0.306659
111	ACAD11	0.216005	0.0866984
112	ACAD8	-0.0388824	0.876594
113	ACAD9	-0.068492	0.256175
114	ACADL	0.0722379	0.976988
115	ACADM	-0.0336187	0.5555
116	ACADS	0.073304	0.550391
117	ACADSB	-0.0282753	0.683068
118	ACADVL	0.103938	0.45686
119	ACAN	0.192226	0.372613
120	ACAP1	-0.272483	0.487678
121	ACAP2	0.295779	0.460422
122	ACAP3	0.0853369	0.494294
123	ACAT1	-0.106505	0.503937
124	ACAT2	0.189477	0.622788
125	ACBD3	0.0356747	0.500645
126	ACBD4	0.146611	0.433704
127	ACBD5	-0.0954056	0.461211
128	ACBD6	-0.239939	0.303066
129	ACBD7	0.0855334	0.328746
130	ACCS	0.0392636	0.550046
131	ACD	-0.0511669	0.377056
132	ACE	0.0934022	0.55138
133	ACE2	0.0282387	0.0936372
134	ACER2	-0.19364	0.801703
135	ACER3	0.0439463	0.775895
136	ACHE	0.082387	0.730656
137	ACIN1	0.0212477	0.29034
138	ACKR1	0.362799	1.0425
139	ACKR2	-0.149803	0.303918
140	ACKR3	0.0751176	0.761096
141	ACKR4	0.071903	0.0709532
142	ACLY	-0.00928039	0.666981
143	ACMSD	0.0088532	0.0412397
144	ACO1	0.359359	0.399411
145	ACO2	-0.163925	0.488397
146	ACOT1	0.0741947	0.506371
147	ACOT11	0.377896	0.330892
148	ACOT13	0.0514574	0.31764
149	ACOT2	0.372953	0.442552
150	ACOT4	-0.0115025	0.348317
151	ACOT7	0.0992189	0.335138
152	ACOT8	0.311221	0.304681
153	ACOT9	0.229969	0.288747
154	ACOX1	-0.002111	0.345501
155	ACOX2	0.322338	0.637914
156	ACOX3	0.209586	0.443118
157	ACOXL	0.115169	0.398501
158	ACP1	0.0367001	0.297223
159	ACP2	0.126632	0.45407
160	ACP3	0.145648	1.43195
161	ACP4	0.00858284	0.30459
162	ACP5	0.253361	1.12716
163	ACP6	-0.146947	0.35239
164	ACP7	0.104374	0.118089
165	ACR	0.0797801	0.0969326
166	ACRBP	0.122119	0.30633
167	ACRV1	0.202405	0.292241
168	ACSBG1	0.13387	0.231352
169	ACSBG2	-0.0971754	0.0531089
170	ACSF2	0.194382	0.748787
171	ACSF3	-0.00993333	0.274197
172	ACSL1	-0.0299221	0.705599
173	ACSL3	-0.0301714	0.803475
174	ACSL4	0.363269	0.660361
175	ACSL5	0.0454323	1.13745
176	ACSL6	-0.0471502	0.071637
177	ACSM1	0.0737076	1.79624
178	ACSM3	-0.0807457	0.908813
179	ACSM4	-0.135974	0.0367548
180	ACSM5	0.0872346	0.115471
181	ACSS1	-0.0921802	0.477452
182	ACSS2	0.233058	0.313685
183	ACSS3	0.422955	0.36886
184	ACTA1	0.129594	1.52874
185	ACTA2	0.482205	1.08863
186	ACTB	0.311545	0.427851
187	ACTC1	0.291633	1.36748
188	ACTG1	0.106495	0.367781
189	ACTG2	0.450998	1.41049
190	ACTL6A	0.15437	0.45398
191	ACTN1	0.421229	0.697613
192	ACTN2	0.0288019	0.888297
193	ACTN3	-0.161059	0.063511
194	ACTN4	0.193004	0.465671
195	ACTR10	-0.042618	0.250812
196	ACTR1A	-0.0683436	0.305207
197	ACTR1B	-0.0557037	0.258685
198	ACTR2	0.0347001	0.517561
199	ACTR3	0.161926	0.415292
200	ACTR3B	0.110003	0.257549
201	ACTR3C	0.329763	0.168392
202	ACTR5	-0.0724961	0.255438
203	ACTR6	0.195697	0.322076
204	ACTR8	0.0732848	0.382502
205	ACTRT3	0.0170505	0.244964
206	ACVR1	0.230094	0.499199
207	ACVR1B	-0.19838	0.479088
208	ACVR1C	0.270387	0.0796451
209	ACVR2A	0.149868	0.367932
210	ACVR2B	0.117333	0.318124
211	ACVRL1	0.336148	0.500497
212	ACY1	0.125487	0.120717
213	ACY3	0.284437	0.769965
214	ACYP1	0.0894853	0.414075
215	ACYP2	0.1787	0.273039
216	ADA	-0.218566	0.372019
217	ADA2	0.172126	0.71169
218	ADAD2	0.0746199	0.10657
219	ADAM10	-0.115349	0.579249
220	ADAM11	0.221015	0.260115
221	ADAM12	-0.00924795	0.235911
222	ADAM15	-0.0152217	0.37821
223	ADAM17	0.245876	0.312187
224	ADAM19	0.488982	0.495558
225	ADAM20	-0.236633	0.0561113
226	ADAM21	-0.0889139	0.331944
227	ADAM22	0.317282	0.610305
228	ADAM23	0.272901	0.265419
229	ADAM28	0.268838	0.481311
230	ADAM32	0.275565	0.228168
231	ADAM33	0.444066	0.662637
232	ADAM8	0.0512055	0.473461
233	ADAM9	0.0179766	0.812698
234	ADAMDEC1	0.225909	0.618994
235	ADAMTS1	0.342275	1.1288
236	ADAMTS10	0.19778	0.44661
237	ADAMTS12	0.172255	0.248736
238	ADAMTS13	0.0748081	0.406609
239	ADAMTS14	-0.0160063	0.159451
240	ADAMTS15	0.244442	0.302891
241	ADAMTS16	0.061133	0.149275
242	ADAMTS17	0.0849855	0.167461
243	ADAMTS18	0.158082	0.0913835
244	ADAMTS2	0.286459	0.647184
245	ADAMTS3	-0.0585768	0.422124
246	ADAMTS4	0.229036	0.866933
247	ADAMTS5	0.325521	0.43983
248	ADAMTS6	0.151115	0.232678
249	ADAMTS7	0.354792	0.203791
250	ADAMTS8	0.390679	0.513416
251	ADAMTS9	0.214453	0.549882
252	ADAMTSL1	0.0786008	1.05219
253	ADAMTSL2	0.289446	0.560203
254	ADAMTSL3	0.35881	0.670962
255	ADAMTSL4	0.476802	0.391653
256	ADAMTSL5	0.252869	0.312104
257	ADAP1	-0.0600182	0.350486
258	ADAP2	0.111288	0.367224
259	ADAR	-0.011978	0.468361
260	ADARB1	0.0153425	0.376661
261	ADARB2	0.00403496	0.594532
262	ADAT1	-0.0475554	0.473107
263	ADAT2	-0.247287	0.345719
264	ADAT3	0.175083	0.358193
265	ADCK1	0.0179162	0.285323
266	ADCK2	0.270948	0.32125
267	ADCK5	0.0791464	0.523801
268	ADCY1	-0.033607	0.752069
269	ADCY10	0.0909813	0.132227
270	ADCY2	-0.0140177	0.53028
271	ADCY3	0.341547	0.610527
272	ADCY4	0.34034	0.410899
273	ADCY5	0.347871	0.722812
274	ADCY6	-0.060468	0.567759
275	ADCY7	0.337269	0.315687
276	ADCY9	0.208542	0.41998
277	ADCYAP1	0.0744928	0.267031
278	ADCYAP1R1	0.408061	0.24091
279	ADD1	0.116218	0.239566
280	ADD2	0.0955885	0.46043
281	ADD3	0.0423072	0.858692
282	ADGRA2	0.442946	0.979502
283	ADGRA3	0.0326934	0.369164
284	ADGRB1	0.0323224	0.390616
285	ADGRB2	0.287388	0.345603
286	ADGRB3	0.412887	0.172242
287	ADGRD1	0.364973	0.377061
288	ADGRE1	0.121353	0.130958
289	ADGRE2	0.283113	0.284447
290	ADGRE3	0.295671	0.133516
291	ADGRE5	0.243457	0.637264
292	ADGRF1	0.0423592	1.19213
293	ADGRF3	0.19574	0.0740965
294	ADGRF5	0.0808309	1.40036
295	ADGRG1	-0.197359	0.543626
296	ADGRG2	-0.0321226	0.472604
297	ADGRG3	-0.0507112	0.142418
298	ADGRG5	0.354156	0.257621
299	ADGRG6	0.322828	0.675786
300	ADGRL1	0.0714738	0.595743
301	ADGRL2	0.210025	0.673436
302	ADGRL3	0.351647	0.194232
303	ADGRL4	0.170326	0.555185
304	ADGRV1	0.039679	0.310831
305	ADH1B	0.392246	0.423492
306	ADH1C	0.33717	0.791962
307	ADH5	0.292659	0.49498
308	ADH6	-0.0411446	0.232083
309	ADHFE1	0.205425	0.540136
310	ADI1	0.241429	0.377641
311	ADIPOR1	-0.0599914	0.373883
312	ADIPOR2	-0.00167402	0.336433
313	ADK	0.213755	0.331198
314	ADM	-0.0549707	0.93164
315	ADM2	-0.0613768	0.708012
316	ADM5	-0.328029	0.344162
317	ADNP	0.219054	0.45442
318	ADNP2	-0.126761	0.437143
319	ADO	-0.231612	0.320285
320	ADORA1	-0.289405	0.164939
321	ADORA2A	0.275547	0.0708245
322	ADORA2B	0.273294	0.387372
323	ADORA3	-0.0450828	0.364713
324	ADPGK	0.305991	0.505072
325	ADPRH	0.263965	0.53191
326	ADPRHL1	0.283744	0.478188
327	ADPRM	0.261842	0.602751
328	ADPRS	-0.0611318	0.29777
329	ADRA1A	0.432828	0.447506
330	ADRA1B	0.149874	0.109798
331	ADRA1D	0.440505	0.552187
332	ADRA2A	0.0642318	0.948279
333	ADRA2B	0.282419	0.209044
334	ADRA2C	0.187249	0.839152
335	ADRB1	0.0929951	0.729229
336	ADRB2	-0.151953	0.740331
337	ADRM1	0.0934941	0.309162
338	ADSL	0.368584	0.15965
339	ADSS1	-0.165311	0.347447
340	ADSS2	0.232499	0.470416
341	ADTRP	0.136798	0.361843
342	AEBP1	0.299697	0.942441
343	AEBP2	0.067787	0.384977
344	AEN	0.042776	0.460003
345	AFAP1	0.0872081	0.29639
346	AFAP1L1	0.416573	0.353095
347	AFAP1L2	0.224059	0.668048
348	AFDN	0.0747871	0.65492
349	AFF1	-0.00492761	0.542923
350	AFF2	0.404376	0.145195
351	AFF3	-0.00575199	1.07055
352	AFF4	-0.0104461	0.594038
353	AFG1L	0.113792	0.190513
354	AFG3L2	-0.0823347	0.459115
355	AFMID	-0.00408666	0.511407
356	AFTPH	-0.0339621	0.4307
357	AGA	-0.0438834	0.455863
358	AGAP1	0.04187	0.465493
359	AGAP2	-0.120957	0.249571
360	AGAP3	0.0441174	0.349514
361	AGAP4	0.182178	0.279452
362	AGAP5	0.169413	0.0886043
363	AGAP6	0.0487792	0.130572
364	AGAP9	0.0736101	0.440278
365	AGBL2	0.0546327	0.191075
366	AGBL3	0.0811737	0.198573
367	AGBL4	0.263725	0.105322
368	AGBL5	0.00371482	0.27081
369	AGER	-0.0861006	0.577313
370	AGFG1	0.117587	0.361759
371	AGFG2	-0.10819	0.527118
372	AGGF1	-0.0644783	0.27697
373	AGK	0.233968	0.275061
374	AGL	0.0618911	0.519441
375	AGMAT	0.0328993	0.568698
376	AGMO	0.0197207	0.260783
377	AGO1	0.00945967	0.289481
378	AGO2	-0.109785	0.514362
379	AGO3	0.263316	0.243904
380	AGO4	0.0203167	0.422412
381	AGPAT1	0.0875953	0.369038
382	AGPAT2	-0.0788153	0.551005
383	AGPAT3	0.0454069	0.335695
384	AGPAT4	0.471656	0.221086
385	AGPAT5	0.0493404	0.537369
386	AGPS	0.332875	0.452467
387	AGR2	-0.205302	1.49335
388	AGRN	0.0166221	0.612859
389	AGRP	0.0786731	0.116578
390	AGT	0.0490122	1.52937
391	AGTPBP1	0.248301	0.393206
392	AGTR1	-0.0793468	1.36068
393	AGTRAP	0.102818	0.539771
394	AHCTF1	0.0671008	0.388261
395	AHCY	0.261134	0.365214
396	AHCYL1	-0.0808462	0.389229
397	AHCYL2	-0.175535	0.512396
398	AHDC1	0.40752	0.40419
399	AHI1	-0.0677409	0.322141
400	AHNAK	0.164943	0.744821
401	AHNAK2	0.494272	0.653186
402	AHR	0.373345	0.641133
403	AHRR	0.344449	0.0792332
404	AHSA1	0.0979414	0.321691
405	AIDA	0.236166	0.678648
406	AIF1	0.14073	0.775271
407	AIF1L	0.110722	0.486652
408	AIFM1	0.131689	0.300503
409	AIFM2	0.255306	0.40763
410	AIFM3	-0.0150052	0.185015
411	AIG1	-0.0305174	0.255211
412	AIM2	0.0128676	0.350418
413	AIMP1	0.176534	0.235836
414	AIMP2	0.0330293	0.430106
415	AIP	0.0013718	0.429752
416	AIRE	0.161307	0.0536827
417	AJAP1	0.443838	0.203626
418	AJM1	0.141261	0.5022
419	AJUBA	0.393461	0.609099
420	AK1	-0.212785	0.325156
421	AK2	0.0156521	0.23709
422	AK3	-0.180078	0.431866
423	AK4	-0.156849	0.612588
424	AK5	0.101796	0.953221
425	AK6	-0.0417162	0.367038
426	AK7	0.000203853	0.29855
427	AK8	-0.232703	0.294962
428	AK9	0.0861961	0.250938
429	AKAP1	0.0981229	0.47621
430	AKAP10	0.0211177	0.350285
431	AKAP11	0.0900517	0.602751
432	AKAP12	0.131549	0.847618
433	AKAP13	0.209805	0.573287
434	AKAP17A	-0.171194	0.413972
435	AKAP3	0.250382	0.296606
436	AKAP5	0.0954011	0.292343
437	AKAP6	0.237863	0.21636
438	AKAP7	0.164658	0.604862
439	AKAP8	-0.111649	0.266816
440	AKAP8L	-0.141033	0.367778
441	AKAP9	0.322937	0.5766
442	AKIP1	0.121448	0.258558
443	AKIRIN1	0.0228952	0.529282
444	AKIRIN2	-0.0358153	0.350249
445	AKNA	0.104755	0.491932
446	AKR1A1	0.135594	0.338645
447	AKR1B1	0.315688	0.656631
448	AKR1B10	0.139347	0.213787
449	AKR1B15	-0.0876449	0.0581955
450	AKR1C1	0.146673	0.479456
451	AKR1C2	0.0682469	0.355328
452	AKR1C3	0.148488	0.701471
453	AKR1E2	-0.0267279	0.37263
454	AKR7A2	0.041642	0.349875
455	AKR7A3	0.284676	0.434724
456	AKT1	-0.0908047	0.413547
457	AKT1S1	-0.00823686	0.327584
458	AKT2	-0.129154	0.246194
459	AKT3	0.0406999	0.558726
460	AKTIP	-0.0777013	0.307394
461	ALAD	0.0473246	0.580344
462	ALAS1	-0.0621564	0.391843
463	ALAS2	0.206819	0.0840735
464	ALB	0.342818	1.03536
465	ALCAM	0.14739	0.635767
466	ALDH16A1	-0.0315559	0.463472
467	ALDH18A1	-0.0831239	0.447687
468	ALDH1A1	0.109466	1.34501
469	ALDH1A2	0.40207	0.763144
470	ALDH1A3	0.179265	0.821481
471	ALDH1B1	0.325151	0.496645
472	ALDH1L1	0.25588	0.726713
473	ALDH1L2	0.473776	0.328332
474	ALDH2	0.133164	0.837778
475	ALDH3A1	0.0855483	0.283441
476	ALDH3A2	0.117023	0.523895
477	ALDH3B1	0.292149	0.398313
478	ALDH4A1	0.132563	0.660147
479	ALDH5A1	-0.0716394	0.433245
480	ALDH6A1	-0.0218197	0.637904
481	ALDH7A1	0.0261698	0.517148
482	ALDH8A1	0.07935	0.163025
483	ALDH9A1	-0.00988953	0.508832
484	ALDOA	-0.108033	0.447083
485	ALDOB	0.0460642	0.0976142
486	ALDOC	-0.0359596	0.575432
487	ALG1	-0.163671	0.315977
488	ALG10	0.0845762	0.271711
489	ALG10B	0.127993	0.347372
490	ALG11	0.10289	0.300305
491	ALG12	-0.141156	0.364498
492	ALG13	-0.0350788	0.276937
493	ALG14	0.415368	0.229244
494	ALG1L2	0.189642	0.139582
495	ALG2	0.00581493	0.412424
496	ALG3	0.206068	0.360191
497	ALG5	-0.079898	0.415827
498	ALG6	0.107108	0.342644
499	ALG8	0.0723908	0.330729
500	ALG9	0.046964	0.1852
501	ALK	-0.0372951	0.0415576
502	ALKAL2	0.223834	0.260037
503	ALKBH1	-0.0867347	0.223043
504	ALKBH2	0.13544	0.462648
505	ALKBH3	0.112079	0.307876
506	ALKBH4	0.254592	0.307677
507	ALKBH5	-0.19953	0.267635
508	ALKBH6	-0.110063	0.192613
509	ALKBH7	0.10055	0.594681
510	ALKBH8	0.111712	0.292093
511	ALMS1	0.231164	0.409793
512	ALOX12	-0.0745116	0.114685
513	ALOX15	0.0106297	1.10956
514	ALOX15B	0.113317	2.50047
515	ALOX5	0.184872	0.680749
516	ALOX5AP	0.284631	0.677392
517	ALPK1	0.334534	0.339092
518	ALPK2	-0.170522	0.0925795
519	ALPK3	0.177764	0.438041
520	ALPL	0.0683783	0.853451
521	ALS2	0.212631	0.334097
522	ALS2CL	0.0615525	0.526756
523	ALX4	0.470213	0.355322
524	ALYREF	-0.239665	0.370753
525	AMACR	-0.137669	1.31971
526	AMBP	0.0447623	0.31385
527	AMBRA1	0.00491988	0.335111
528	AMD1	-0.0349126	0.882643
529	AMDHD1	-0.15569	0.115517
530	AMDHD2	-0.0906078	0.394691
531	AMER1	0.0795676	0.313319
532	AMFR	0.0356193	0.312015
533	AMH	0.409018	0.681262
534	AMHR2	0.0996801	0.126285
535	AMIGO1	-0.139416	0.431465
536	AMIGO2	0.174253	0.709471
537	AMMECR1	0.158207	0.49502
538	AMMECR1L	0.00384235	0.350383
539	AMN	-0.0757196	0.214233
540	AMN1	0.0970417	0.282494
541	AMOT	0.132113	0.752442
542	AMOTL1	0.0692994	0.820141
543	AMOTL2	0.372916	0.725322
544	AMPD2	0.100502	0.306152
545	AMPD3	0.0684733	0.828321
546	AMPH	0.391423	0.197427
547	AMT	0.307247	0.0713376
548	AMY2B	-0.0564174	0.4234
549	AMZ1	-0.183511	0.0566007
550	AMZ2	0.0954191	0.228126
551	ANAPC1	0.256035	0.360386
552	ANAPC10	-0.238415	0.137786
553	ANAPC11	0.426318	0.458893
554	ANAPC13	0.0943036	0.344353
555	ANAPC15	0.127292	0.327848
556	ANAPC16	-0.025363	0.287767
557	ANAPC2	0.0838759	0.345322
558	ANAPC4	0.00650258	0.296126
559	ANAPC5	0.114178	0.309951
560	ANAPC7	-0.329987	0.26413
561	ANG	0.138155	0.922188
562	ANGEL1	0.0363612	0.382693
563	ANGEL2	0.173474	0.33991
564	ANGPT1	0.395033	0.722992
565	ANGPT2	0.038221	0.528772
566	ANGPT4	0.318935	0.0893001
567	ANGPTL1	0.495852	0.575133
568	ANGPTL2	0.475393	0.806808
569	ANGPTL3	0.184423	0.670392
570	ANGPTL4	0.254305	1.11662
571	ANGPTL6	-0.0169555	0.0947989
572	ANGPTL8	0.168409	0.118385
573	ANK1	0.224491	0.438574
574	ANK2	0.485963	0.335523
575	ANK3	0.19015	0.655591
576	ANKAR	0.103635	0.202118
577	ANKDD1A	0.230293	0.332598
578	ANKDD1B	0.222983	0.232947
579	ANKEF1	0.0831918	0.356474
580	ANKFN1	-0.0532921	0.0973937
581	ANKFY1	-0.0726208	0.520049
582	ANKH	-0.0967798	0.726082
583	ANKHD1	0.432517	0.0921363
584	ANKIB1	0.115963	0.504762
585	ANKK1	0.0584563	0.366963
586	ANKLE1	0.0148634	0.161006
587	ANKLE2	0.0224244	0.227867
588	ANKMY1	-0.0879861	0.238278
589	ANKMY2	0.149579	0.309042
590	ANKRA2	0.130619	0.475781
591	ANKRD1	-0.120317	0.859201
592	ANKRD10	-0.332375	0.539568
593	ANKRD11	0.132356	0.406382
594	ANKRD12	0.198785	0.428693
595	ANKRD13A	0.191045	0.409398
596	ANKRD13B	0.0190425	0.507202
597	ANKRD13C	0.105603	0.322805
598	ANKRD13D	-0.139714	0.447156
599	ANKRD16	0.273921	0.351483
600	ANKRD17	0.164197	0.566244
601	ANKRD18A	-0.0822023	0.261687
602	ANKRD18B	0.199042	0.321826
603	ANKRD2	-0.0901441	0.367396
604	ANKRD22	-0.0669485	0.707067
605	ANKRD23	-0.149291	0.241786
606	ANKRD24	0.116384	0.478144
607	ANKRD26	0.17484	0.235318
608	ANKRD27	-0.116229	0.343343
609	ANKRD28	0.243959	0.347207
610	ANKRD29	0.0393255	0.83643
611	ANKRD31	0.101625	0.0651052
612	ANKRD33B	0.342053	0.303202
613	ANKRD34A	0.0166154	0.349075
614	ANKRD35	0.263165	0.583546
615	ANKRD36	0.13522	0.165649
616	ANKRD36B	-0.0568937	0.20255
617	ANKRD36C	0.0253364	0.181548
618	ANKRD37	-0.0882603	0.82783
619	ANKRD39	-0.103115	0.243913
620	ANKRD40	0.109835	0.449073
621	ANKRD42	0.301594	0.268839
622	ANKRD44	0.344008	0.340442
623	ANKRD45	0.174779	0.0808991
624	ANKRD46	0.139678	0.359334
625	ANKRD49	0.067607	0.297088
626	ANKRD50	0.23231	0.691044
627	ANKRD52	-0.0115389	0.470553
628	ANKRD53	0.0831521	0.228055
629	ANKRD54	0.0110704	0.326114
630	ANKRD55	0.26927	0.0896877
631	ANKRD6	0.295525	0.376344
632	ANKRD61	-0.0167731	0.209212
633	ANKRD65	0.247569	0.670127
634	ANKRD9	0.00679642	0.421434
635	ANKS1A	0.0214718	0.381579
636	ANKS1B	0.128224	0.178121
637	ANKS3	0.0213738	0.453826
638	ANKS6	0.0084482	0.452944
639	ANKZF1	0.169946	0.44179
640	ANLN	0.291768	0.525038
641	ANO1	0.333404	0.733837
642	ANO10	0.0762626	0.276077
643	ANO2	-0.033944	0.158393
644	ANO3	-0.000783489	0.182997
645	ANO4	0.259068	0.57501
646	ANO5	0.339577	0.522379
647	ANO6	0.488598	0.708902
648	ANO7	0.309425	1.23596
649	ANO8	0.00666661	0.421339
650	ANO9	-0.0751865	0.593575
651	ANOS1	0.0424046	0.666299
652	ANP32A	-0.200577	0.286347
653	ANP32B	-0.0734701	0.355156
654	ANP32E	0.415046	0.620355
655	ANPEP	0.0400619	2.49545
656	ANTKMT	0.157127	0.604698
657	ANTXR1	0.350576	0.910455
658	ANTXR2	0.0719908	0.846398
659	ANXA1	0.39911	0.959859
660	ANXA10	0.0923897	0.190567
661	ANXA11	0.0416008	0.409465
662	ANXA13	0.0145853	0.199422
663	ANXA2	0.125708	0.823291
664	ANXA2R	0.0106676	0.601118
665	ANXA3	-0.0900728	0.776594
666	ANXA4	0.143369	0.366144
667	ANXA5	-0.0420844	0.473468
668	ANXA6	0.450551	0.720509
669	ANXA7	-0.0764257	0.319955
670	ANXA8	0.0894646	0.373838
671	ANXA9	0.17054	0.55767
672	AOAH	0.272092	0.572345
673	AOC1	0.0875741	1.73359
674	AOC2	-0.108904	0.334397
675	AOC3	0.45131	0.906242
676	AOPEP	0.182042	0.478813
677	AOX1	0.26719	0.984689
678	AP1AR	0.0929894	0.39416
679	AP1B1	-0.123627	0.465713
680	AP1G1	-0.141032	0.529018
681	AP1G2	-0.118788	0.463372
682	AP1M1	0.288099	0.203406
683	AP1M2	0.141541	0.398954
684	AP1S1	0.201269	0.415593
685	AP1S2	0.306076	0.347482
686	AP1S3	-0.0208631	0.415257
687	AP2A1	-0.0067864	0.326517
688	AP2A2	-0.046534	0.243217
689	AP2B1	-0.107169	0.376638
690	AP2M1	-0.0128429	0.255408
691	AP2S1	0.298566	0.616616
692	AP3B1	0.173224	0.459987
693	AP3B2	0.237343	0.236665
694	AP3D1	-0.0372225	0.383144
695	AP3M1	-0.0386082	0.493403
696	AP3M2	0.188938	0.392759
697	AP3S1	-0.30985	0.320613
698	AP3S2	-0.115942	0.254309
699	AP4B1	-0.146746	0.25008
700	AP4E1	0.307979	0.315499
701	AP4M1	0.100672	0.331388
702	AP4S1	0.384868	0.154488
703	AP5B1	0.0106303	0.361685
704	AP5M1	0.0730871	0.303867
705	AP5S1	0.153145	0.221138
706	AP5Z1	-0.0394837	0.36247
707	APAF1	0.238705	0.457787
708	APBA1	0.0227604	0.342747
709	APBA2	0.114405	0.566921
710	APBA3	-0.33675	0.279452
711	APBB1	0.398808	0.514637
712	APBB1IP	0.333272	0.534111
713	APBB2	0.277301	0.338679
714	APBB3	0.115684	0.45284
715	APC	0.0589019	0.535157
716	APC2	-0.0955969	0.15473
717	APCDD1	-0.106547	0.803201
718	APCDD1L	0.0930574	0.119663
719	APEH	0.108177	0.37068
720	APEX1	-0.00389782	0.413988
721	APEX2	-0.110385	0.260141
722	APH1A	-0.0671167	0.275108
723	APH1B	0.0291754	0.502712
724	API5	0.0593565	0.339008
725	APIP	0.370107	0.337888
726	APLF	0.359683	0.21648
727	APLN	0.225809	0.759215
728	APLNR	0.0342155	0.640253
729	APLP1	0.0283235	0.543049
730	APLP2	0.0653118	0.503999
731	APMAP	0.0743859	0.426544
732	APOA1	-0.0172516	0.306451
733	APOB	0.220421	0.103978
734	APOBEC2	-0.00399542	0.351517
735	APOBEC3A	0.107043	0.183302
736	APOBEC3B	0.119522	0.301972
737	APOBEC3C	0.272899	0.978004
738	APOBEC3D	0.273631	0.100031
739	APOBEC3F	0.130081	0.492702
740	APOBEC3G	0.191528	0.558275
741	APOBEC3H	0.0722186	0.267922
742	APOBR	0.0866688	0.472369
743	APOC1	-0.0631944	1.12286
744	APOD	0.0816942	1.23059
745	APOE	-0.0536969	1.21015
746	APOF	-0.149101	1.07674
747	APOL1	0.166675	0.904898
748	APOL2	-0.136636	0.44194
749	APOL3	0.123744	0.6571
750	APOL4	0.0125695	1.31603
751	APOL6	0.158291	0.779796
752	APOLD1	0.166648	0.826345
753	APOM	0.166875	0.326912
754	APOO	0.211012	0.350706
755	APOOL	-0.101238	0.56943
756	APP	-0.0735114	0.75734
757	APPBP2	0.0382896	0.423857
758	APPL1	0.279038	0.388297
759	APPL2	-0.1598	0.515478
760	APRT	0.122985	0.649679
761	APTR	-0.0644892	0.325882
762	APTX	-0.0354895	0.194853
763	AQP1	0.218732	0.794107
764	AQP11	0.0834565	0.766595
765	AQP3	-0.133493	1.00423
766	AQP5	0.104591	0.37989
767	AQP6	-0.367337	0.12453
768	AQP7	0.279461	0.150757
769	AQP8	-0.00840332	0.181936
770	AQP9	-0.00164881	0.289983
771	AQR	0.0814694	0.4153
772	AR	0.0859005	0.580697
773	ARAF	-0.14373	0.354267
774	ARAP1	0.202632	0.417066
775	ARAP2	0.103044	0.382764
776	ARAP3	0.324701	0.486223
777	ARC	0.188364	0.407276
778	ARCN1	-0.0739911	0.458617
779	AREG	0.159182	0.928553
780	AREL1	-0.113446	0.375442
781	ARF1	0.259857	0.296929
782	ARF3	-0.206411	0.330476
783	ARF4	-0.138781	0.526599
784	ARF5	0.143543	0.385247
785	ARF6	0.0503867	0.427617
786	ARFGAP1	-0.0850449	0.414138
787	ARFGAP2	-0.0445931	0.255323
788	ARFGAP3	0.0665455	0.497353
789	ARFGEF1	0.185148	0.450497
790	ARFGEF2	0.0241766	0.65037
791	ARFGEF3	-0.0414316	0.95296
792	ARFIP1	0.0237771	0.384988
793	ARFIP2	-0.0554811	0.397134
794	ARFRP1	-0.0654614	0.417481
795	ARG1	0.0587877	0.261316
796	ARG2	0.153744	1.24479
797	ARGLU1	0.0271434	0.598193
798	ARHGAP1	0.231138	0.38585
799	ARHGAP10	0.443639	0.457214
800	ARHGAP11A	0.345462	0.326774
801	ARHGAP11B	0.0568548	0.0874251
802	ARHGAP12	-0.0704308	0.557994
803	ARHGAP15	0.196673	0.381634
804	ARHGAP17	0.0773809	0.270024
805	ARHGAP18	0.115475	0.601418
806	ARHGAP19	0.0480062	0.297239
807	ARHGAP20	0.377119	0.474867
808	ARHGAP21	0.102389	0.44457
809	ARHGAP22	0.178944	0.250604
810	ARHGAP23	0.416734	0.683853
811	ARHGAP24	0.223639	0.288088
812	ARHGAP25	0.321741	0.453186
813	ARHGAP26	0.0133829	0.466442
814	ARHGAP27	0.0259666	0.413603
815	ARHGAP28	-0.0220979	0.678002
816	ARHGAP29	0.115725	0.598072
817	ARHGAP30	0.360829	0.601211
818	ARHGAP31	0.323899	0.488817
819	ARHGAP32	0.105741	0.576492
820	ARHGAP33	0.0970037	0.500867
821	ARHGAP35	0.0127999	0.499997
822	ARHGAP39	0.116564	0.449424
823	ARHGAP4	-0.130624	0.584421
824	ARHGAP40	0.120571	0.598204
825	ARHGAP42	0.198264	0.350064
826	ARHGAP44	0.181889	0.320952
827	ARHGAP45	0.0553417	0.572677
828	ARHGAP5	0.187193	0.681845
829	ARHGAP6	-0.0622734	0.584586
830	ARHGAP8	0.042012	0.266313
831	ARHGAP9	0.282028	0.48523
832	ARHGDIA	0.0133878	0.401244
833	ARHGDIB	0.101148	0.903075
834	ARHGDIG	0.261887	0.818742
835	ARHGEF1	-0.18353	0.398492
836	ARHGEF10	-0.195172	0.102082
837	ARHGEF10L	0.259728	0.3669
838	ARHGEF11	0.00314761	0.47402
839	ARHGEF12	-0.0565629	0.524984
840	ARHGEF15	0.297751	0.42821
841	ARHGEF16	0.382091	0.413175
842	ARHGEF17	0.415703	0.570234
843	ARHGEF18	-0.0371051	0.21722
844	ARHGEF19	0.238375	0.626588
845	ARHGEF2	0.364832	0.466071
846	ARHGEF25	0.467119	0.509426
847	ARHGEF26	0.292644	0.731522
848	ARHGEF28	0.350829	0.421527
849	ARHGEF3	0.141994	0.607792
850	ARHGEF33	0.0449701	0.106691
851	ARHGEF35	-0.0812663	0.541985
852	ARHGEF37	-0.148357	0.618672
853	ARHGEF38	0.0146698	0.656127
854	ARHGEF39	0.038849	0.220145
855	ARHGEF4	0.404416	0.345295
856	ARHGEF40	0.478615	0.492604
857	ARHGEF5	-0.242246	0.312299
858	ARHGEF6	0.395689	0.513567
859	ARHGEF7	0.176436	0.431787
860	ARHGEF9	0.269902	0.290333
861	ARID1A	0.122016	0.470458
862	ARID1B	0.184993	0.374648
863	ARID2	0.254165	0.407447
864	ARID3A	0.0270536	0.347151
865	ARID3B	-0.106422	0.256974
866	ARID3C	-0.0109098	0.127366
867	ARID4A	0.174073	0.434238
868	ARID4B	0.266782	0.370107
869	ARID5A	0.288718	0.787468
870	ARID5B	-0.00862081	0.654536
871	ARIH1	0.106493	0.297409
872	ARIH2	0.0289702	0.337252
873	ARL1	0.0942239	0.380866
874	ARL10	0.432339	0.25325
875	ARL11	0.233127	0.181628
876	ARL13A	0.0909911	0.0845263
877	ARL13B	0.020822	0.421789
878	ARL14EP	-0.073162	0.283338
879	ARL15	-0.0981727	0.503058
880	ARL16	0.185816	0.486396
881	ARL17A	-0.0791069	0.125325
882	ARL17B	0.067792	0.145024
883	ARL2	0.181237	0.558238
884	ARL2BP	0.0512363	0.173852
885	ARL3	-0.0528189	0.336236
886	ARL4A	0.359665	0.533859
887	ARL4C	0.326239	0.692315
888	ARL4D	0.397111	0.748369
889	ARL5A	0.0620304	0.436172
890	ARL5B	0.0323412	0.552578
891	ARL6	0.0627316	0.346676
892	ARL6IP1	0.322768	0.422543
893	ARL6IP4	0.0459176	0.173234
894	ARL6IP5	0.0924982	0.479078
895	ARL6IP6	0.238389	0.361601
896	ARL8A	0.0104405	0.249781
897	ARL8B	-0.0468246	0.334525
898	ARL9	-0.0607282	0.315185
899	ARMC1	0.0114421	0.38603
900	ARMC10	0.0466818	0.267795
901	ARMC12	-0.0145468	0.400316
902	ARMC2	-0.0822106	0.208001
903	ARMC5	0.0333178	0.391129
904	ARMC6	-0.013494	0.352503
905	ARMC7	-0.00159754	0.355743
906	ARMC8	0.0619235	0.313838
907	ARMC9	0.122682	0.225836
908	ARMCX1	0.32773	1.03896
909	ARMCX2	0.156268	0.83473
910	ARMCX3	-0.0789909	0.397385
911	ARMCX4	0.398503	0.428959
912	ARMCX5	-0.126005	0.317676
913	ARMCX6	0.0449734	0.343133
914	ARMH1	0.20706	0.410198
915	ARMH3	0.00967598	0.283731
916	ARMH4	0.48295	0.236903
917	ARMT1	-0.0901076	0.43265
918	ARNT	0.218016	0.408527
919	ARNT2	0.00191694	0.563811
920	ARPC1A	0.00308668	0.467063
921	ARPC1B	0.133842	0.131834
922	ARPC2	-0.166276	0.344696
923	ARPC3	-0.0881676	0.364537
924	ARPC4	0.0499967	0.45407
925	ARPC5	0.051732	0.28864
926	ARPC5L	0.0917784	0.364646
927	ARPIN	-0.0308115	0.390415
928	ARPP19	0.0379539	0.405242
929	ARR3	0.0147694	0.138914
930	ARRB1	-0.0298472	0.433988
931	ARRB2	0.116462	0.420096
932	ARRDC1	-0.0337994	0.473617
933	ARRDC2	0.00558603	0.659744
934	ARRDC3	0.195179	0.842456
935	ARRDC4	0.0247563	0.53509
936	ARRDC5	0.339118	0.169154
937	ARSA	0.0764357	0.513303
938	ARSB	0.31597	0.385621
939	ARSD	-0.133384	0.507513
940	ARSG	0.0941371	0.392953
941	ARSI	0.422246	0.276087
942	ARSJ	0.391736	0.57004
943	ARSK	0.173967	0.391705
944	ARSL	0.249273	0.222996
945	ART3	-0.0041904	0.311912
946	ART4	-0.0566086	0.507402
947	ART5	0.12651	0.332066
948	ARTN	-0.137703	0.402245
949	ARV1	0.18611	0.321284
950	ARVCF	0.323936	0.431179
951	ASAH1	0.105819	0.55041
952	ASAH2	0.139602	0.113638
953	ASAH2B	0.00413675	0.223953
954	ASAP1	0.344552	0.536514
955	ASAP2	0.0703688	0.600637
956	ASAP3	0.236896	0.546701
957	ASB1	0.268067	0.322352
958	ASB12	0.0805678	0.17341
959	ASB13	-0.0827024	0.409728
960	ASB14	-0.114526	0.103227
961	ASB16	-0.142263	0.266677
962	ASB2	0.425767	0.745831
963	ASB3	0.0219762	0.415205
964	ASB4	0.149036	0.0692633
965	ASB6	-0.121201	0.214899
966	ASB7	0.124577	0.272961
967	ASB8	0.0254591	0.296545
968	ASB9	0.0370473	0.673399
969	ASCC1	0.024278	0.351905
970	ASCC2	0.0188668	0.249452
971	ASCC3	0.142314	0.537503
972	ASCL2	0.0851369	0.786367
973	ASCL5	-0.0276392	0.118624
974	ASF1A	0.010925	0.409589
975	ASF1B	0.309845	0.671481
976	ASGR1	0.332992	0.186576
977	ASGR2	-0.0746923	0.157287
978	ASH1L	0.22902	0.529064
979	ASH2L	-0.0921205	0.373694
980	ASIC1	-0.0797033	0.452254
981	ASIC2	0.0921732	0.382318
982	ASIC3	0.295633	0.520127
983	ASIC4	-0.0303045	0.0849225
984	ASIP	0.00720858	0.151197
985	ASL	-0.222522	0.338319
986	ASMT	-0.226722	0.0664359
987	ASMTL	0.219096	0.311898
988	ASNS	0.0683426	0.122201
989	ASNSD1	0.0470121	0.213028
990	ASPA	0.396994	0.321017
991	ASPDH	-0.0758301	0.145672
992	ASPG	-0.120829	0.133097
993	ASPH	0.331474	0.573161
994	ASPHD1	0.1635	0.598188
995	ASPHD2	0.101826	0.367599
996	ASPM	0.324316	0.338772
997	ASPN	0.0344506	0.958434
998	ASPRV1	0.0815799	0.243467
999	ASPSCR1	0.13323	0.420579
1000	ASRGL1	-0.0700279	0.822981
1001	ASS1	0.0837566	0.904409
1002	ASTE1	0.098715	0.241884
1003	ASTN1	0.400708	0.171089
1004	ASTN2	-0.0453256	0.762344
1005	ASXL1	0.0844923	0.387248
1006	ASXL2	0.123999	0.4879
1007	ASXL3	0.240284	0.1773
1008	ATAD1	-0.0265227	0.73564
1009	ATAD2	0.109542	0.580607
1010	ATAD2B	0.33932	0.322706
1011	ATAD3A	0.147476	0.454053
1012	ATAD3B	-0.0303226	0.552615
1013	ATAD3C	-0.0565569	0.490218
1014	ATAD5	0.357595	0.202526
1015	ATAT1	0.025487	0.420749
1016	ATE1	-0.0154045	0.472481
1017	ATF1	0.144145	0.454796
1018	ATF2	0.00226835	0.43983
1019	ATF3	0.358933	1.59437
1020	ATF4	0.165135	0.366299
1021	ATF5	-0.119872	0.57772
1022	ATF6	0.171377	0.476607
1023	ATF6B	0.130328	0.365333
1024	ATF7	0.0538587	0.341141
1025	ATF7IP	0.246472	0.507137
1026	ATF7IP2	-0.303205	0.495907
1027	ATG10	-0.0521277	0.236396
1028	ATG101	0.129088	0.379731
1029	ATG12	-0.0511575	0.253246
1030	ATG13	-0.27344	0.295144
1031	ATG14	0.0444658	0.291992
1032	ATG16L1	-0.061069	0.3043
1033	ATG16L2	-0.049986	0.491715
1034	ATG2A	-0.197407	0.316834
1035	ATG2B	-0.0863229	0.450569
1036	ATG3	0.120552	0.256178
1037	ATG4A	-0.0891507	0.370119
1038	ATG4B	-0.104708	0.339592
1039	ATG4C	0.188387	0.326678
1040	ATG4D	0.0724676	0.301851
1041	ATG5	0.095054	0.419532
1042	ATG7	0.0639807	0.229592
1043	ATG9A	-0.147472	0.62867
1044	ATG9B	0.0959373	0.34198
1045	ATIC	0.0480458	0.374447
1046	ATL1	0.030847	0.44085
1047	ATL2	0.0493965	0.448055
1048	ATL3	0.146163	0.43568
1049	ATM	0.244245	0.439492
1050	ATMIN	-0.196302	0.41871
1051	ATN1	0.0250695	0.412206
1052	ATOH7	-0.133058	0.146274
1053	ATOH8	0.0722461	0.659487
1054	ATOX1	-0.134089	0.451317
1055	ATP10A	0.148891	0.329511
1056	ATP10B	-0.0245546	0.0367788
1057	ATP10D	0.371103	0.552469
1058	ATP11A	0.0994519	0.998183
1059	ATP11B	-0.016013	0.735297
1060	ATP11C	0.305957	0.474878
1061	ATP13A1	-0.0154158	0.315198
1062	ATP13A2	0.162441	0.389579
1063	ATP13A3	0.218887	0.502929
1064	ATP13A4	0.113052	0.103407
1065	ATP1A1	0.045647	0.964463
1066	ATP1A2	0.42399	1.03373
1067	ATP1A3	0.173057	0.0335968
1068	ATP1A4	0.137149	0.114804
1069	ATP1B1	0.326323	0.892511
1070	ATP1B2	0.199987	0.46469
1071	ATP1B3	-0.0248132	0.419625
1072	ATP23	-0.0450816	0.232363
1073	ATP2A1	0.337474	0.47536
1074	ATP2A2	0.183005	0.616324
1075	ATP2A3	0.174579	0.852639
1076	ATP2B1	0.270903	0.498478
1077	ATP2B2	0.227008	0.0535513
1078	ATP2B4	0.47554	0.938105
1079	ATP2C1	-0.0326974	0.633085
1080	ATP2C2	0.144394	0.732379
1081	ATP5F1A	0.128848	0.349917
1082	ATP5F1B	0.10898	0.375293
1083	ATP5F1C	0.0444212	0.299519
1084	ATP5F1D	0.308706	0.654898
1085	ATP5F1E	-0.0160689	0.513434
1086	ATP5IF1	0.0802835	0.416637
1087	ATP5MC1	0.192062	0.461497
1088	ATP5MC2	0.145957	0.373052
1089	ATP5MC3	0.0115001	0.354571
1090	ATP5ME	0.0458577	0.719996
1091	ATP5MF	0.0377547	0.536581
1092	ATP5MG	0.122552	0.402179
1093	ATP5MGL	-0.0973856	0.123316
1094	ATP5PB	0.03284	0.300778
1095	ATP5PD	0.185379	0.370726
1096	ATP5PF	0.00314151	0.379628
1097	ATP5PO	-0.176045	0.546759
1098	ATP6AP1	0.0494323	0.377748
1099	ATP6AP2	0.0130777	0.361005
1100	ATP6V0A1	0.129821	0.341992
1101	ATP6V0A2	-0.0129894	0.243172
1102	ATP6V0B	0.216015	0.461324
1103	ATP6V0C	0.152205	0.140715
1104	ATP6V0D1	-0.0338111	0.407449
1105	ATP6V0D2	0.209248	0.267781
1106	ATP6V0E1	-0.192164	0.329107
1107	ATP6V0E2	-0.00950974	0.618599
1108	ATP6V1A	0.0343734	0.526018
1109	ATP6V1B2	-0.011574	0.383662
1110	ATP6V1C1	0.0152419	0.375023
1111	ATP6V1C2	0.031165	0.561996
1112	ATP6V1D	0.098662	0.332374
1113	ATP6V1E1	0.241969	0.304361
1114	ATP6V1E2	0.339337	0.266816
1115	ATP6V1F	0.294782	0.431451
1116	ATP6V1G1	-0.0139462	0.471745
1117	ATP6V1G2	0.0703116	0.22968
1118	ATP6V1H	0.0872707	0.365018
1119	ATP7A	0.122387	0.477524
1120	ATP7B	0.00214308	0.496491
1121	ATP8A1	0.209052	0.678084
1122	ATP8A2	0.0347243	1.03505
1123	ATP8B1	-0.110763	0.651678
1124	ATP8B2	0.0229829	0.776546
1125	ATP8B3	-0.00433867	0.0851188
1126	ATP8B4	-0.0049018	0.677116
1127	ATP9A	-0.039918	0.635451
1128	ATP9B	-0.243909	0.307561
1129	ATPAF1	0.19416	0.280586
1130	ATPAF2	0.181939	0.274423
1131	ATPSCKMT	0.00468215	0.278193
1132	ATR	0.232108	0.366597
1133	ATRAID	0.00813637	0.297634
1134	ATRIP	0.168333	0.273793
1135	ATRN	0.0583045	0.433778
1136	ATRNL1	0.17751	0.364984
1137	ATRX	0.246044	0.489999
1138	ATXN1	0.187	0.489721
1139	ATXN10	0.0393788	0.320515
1140	ATXN1L	0.0451276	0.500944
1141	ATXN2	0.0252282	0.410774
1142	ATXN2L	-0.0325492	0.516149
1143	ATXN3	0.0462888	0.231962
1144	ATXN7	0.110391	0.380554
1145	ATXN7L1	0.0713168	0.321848
1146	ATXN7L2	-0.0653197	0.243014
1147	ATXN7L3	-0.131296	0.341379
1148	ATXN7L3B	0.0138642	0.354076
1149	AUH	0.259393	0.527504
1150	AUNIP	0.355731	0.184107
1151	AUP1	-0.111636	0.337946
1152	AURKA	0.363128	0.472447
1153	AURKAIP1	0.297805	0.575194
1154	AURKB	0.262209	0.57522
1155	AURKC	-0.00319658	0.223185
1156	AUTS2	0.298939	0.455449
1157	AVEN	-0.0972074	0.306607
1158	AVIL	-0.102337	0.280891
1159	AVL9	0.0818739	0.479662
1160	AVPI1	0.229478	0.74086
1161	AVPR1A	0.354403	0.426778
1162	AVPR2	0.166916	0.273507
1163	AXDND1	-0.0333132	0.112953
1164	AXIN1	-0.128891	0.307552
1165	AXIN2	0.305787	0.5677
1166	AXL	0.455617	0.696937
1167	AZGP1	0.182885	1.63145
1168	AZI2	-0.0945283	0.369814
1169	AZIN1	0.0628457	0.54776
1170	AZIN2	0.0756673	0.243368
1171	AZU1	0.121364	0.216865
1172	B2M	-0.0276984	0.756574
1173	B3GALNT1	0.371097	0.532831
1174	B3GALNT2	-0.0397638	0.342879
1175	B3GALT1	0.00746145	0.175313
1176	B3GALT2	0.403848	0.501998
1177	B3GALT4	0.197319	0.502846
1178	B3GALT5	0.16552	0.251139
1179	B3GALT6	0.0869659	0.486759
1180	B3GAT1	-0.0351335	0.916643
1181	B3GAT2	0.157117	0.0469707
1182	B3GAT3	0.28076	0.434897
1183	B3GLCT	0.166455	0.32389
1184	B3GNT2	-0.102833	0.543647
1185	B3GNT4	0.0611974	0.145342
1186	B3GNT5	0.184289	0.644858
1187	B3GNT7	0.212745	0.405129
1188	B3GNT8	0.182207	0.395436
1189	B3GNT9	0.410134	0.639814
1190	B3GNTL1	0.155979	0.243396
1191	B4GALNT1	0.418962	0.25695
1192	B4GALNT3	-0.0451045	0.506428
1193	B4GALNT4	0.0660736	0.931297
1194	B4GALT1	0.275322	0.544932
1195	B4GALT2	0.0836702	0.328998
1196	B4GALT3	-0.106534	0.320099
1197	B4GALT4	0.01648	0.307709
1198	B4GALT5	0.0995474	0.491999
1199	B4GALT6	0.0603858	0.414351
1200	B4GALT7	-0.041123	0.345823
1201	B4GAT1	0.306929	0.364038
1202	B9D1	0.12091	0.296376
1203	B9D2	-0.187904	0.408163
1204	BAALC	0.16173	0.18524
1205	BAAT	0.0769322	0.100218
1206	BABAM1	0.206585	0.438732
1207	BABAM2	-0.052975	0.302392
1208	BACE1	0.0722136	0.331804
1209	BACE2	-0.167132	0.937288
1210	BACH1	0.0393804	0.543199
1211	BACH2	0.394663	0.251488
1212	BAD	0.136384	0.465824
1213	BAG1	-0.0904656	0.384329
1214	BAG2	0.196737	0.499247
1215	BAG3	0.15846	0.538825
1216	BAG4	-0.0621839	0.456281
1217	BAG5	-0.120903	0.336172
1218	BAG6	-0.131156	0.228391
1219	BAHCC1	-0.00309909	0.37887
1220	BAHD1	0.006491	0.298844
1221	BAIAP2	0.163429	0.471262
1222	BAIAP2L1	0.171561	0.446262
1223	BAIAP2L2	0.030582	0.950785
1224	BAIAP3	0.0886655	0.612374
1225	BAK1	0.204468	0.316022
1226	BAMBI	0.220437	1.01911
1227	BANF1	0.172555	0.39078
1228	BANK1	0.0748541	1.20719
1229	BANP	-0.232023	0.231057
1230	BAP1	0.065764	0.223174
1231	BARD1	0.179885	0.390666
1232	BARX2	0.129812	0.694655
1233	BASP1	-0.116898	0.980571
1234	BATF	-0.0789732	0.810998
1235	BATF2	0.179989	0.44783
1236	BATF3	-0.0809298	0.35481
1237	BAX	-0.0348318	0.453045
1238	BAZ1A	0.190522	0.449202
1239	BAZ1B	0.219191	0.388024
1240	BAZ2A	0.0426726	0.56822
1241	BAZ2B	0.257853	0.325323
1242	BBC3	0.078257	0.488306
1243	BBIP1	-0.00118849	0.225833
1244	BBOF1	0.156698	0.273035
1245	BBOX1	0.201907	0.386717
1246	BBS1	0.0617238	0.0995377
1247	BBS10	0.00763512	0.488129
1248	BBS12	0.114757	0.344993
1249	BBS2	0.0668207	0.398109
1250	BBS4	0.175668	0.664001
1251	BBS5	0.106519	0.261737
1252	BBS7	0.0425567	0.319352
1253	BBS9	0.235309	0.278586
1254	BBX	0.0656604	0.601324
1255	BCAM	-0.0421579	0.736258
1256	BCAN	0.143452	0.158879
1257	BCAP29	-0.143294	0.166717
1258	BCAP31	0.166656	0.324667
1259	BCAR1	0.100225	0.376175
1260	BCAR3	0.130455	0.447151
1261	BCAS1	0.27591	0.948895
1262	BCAS2	0.0896382	0.321184
1263	BCAS3	0.198955	0.310886
1264	BCAS4	0.0339311	0.380439
1265	BCAT1	-0.0600989	0.438593
1266	BCAT2	0.185215	0.524542
1267	BCCIP	0.179935	0.292356
1268	BCDIN3D	0.0842036	0.252847
1269	BCHE	0.302833	0.699805
1270	BCKDHA	-0.0532182	0.106837
1271	BCKDHB	-0.128747	0.511367
1272	BCKDK	0.0601845	0.297845
1273	BCL10	0.085095	0.336834
1274	BCL11A	0.0738971	0.352608
1275	BCL11B	0.460067	0.315451
1276	BCL2	0.366779	0.617528
1277	BCL2A1	0.286808	0.613447
1278	BCL2L1	0.240263	0.305604
1279	BCL2L10	0.0256379	0.536498
1280	BCL2L11	-0.0542242	0.389818
1281	BCL2L12	0.109776	0.39076
1282	BCL2L13	-0.150925	0.339669
1283	BCL2L14	-0.0778761	0.440559
1284	BCL2L15	-0.024927	0.180135
1285	BCL2L2	-0.118534	0.436612
1286	BCL3	-0.114112	0.756646
1287	BCL6	0.163543	0.614455
1288	BCL6B	0.112943	0.509398
1289	BCL7A	0.206378	0.386144
1290	BCL7B	0.110157	0.272821
1291	BCL7C	0.206554	0.376701
1292	BCL9	0.0205811	0.523787
1293	BCL9L	0.0595634	0.730714
1294	BCLAF1	0.175041	0.380252
1295	BCLAF3	0.169674	0.331835
1296	BCO1	0.111013	0.285139
1297	BCO2	-0.108965	0.162113
1298	BCOR	0.10127	0.64164
1299	BCORL1	0.0450711	0.425747
1300	BCR	-0.0420813	0.330767
1301	BCS1L	0.309592	0.339176
1302	BDH1	0.319243	0.426149
1303	BDH2	0.273989	0.510756
1304	BDKRB1	-0.223459	0.106126
1305	BDKRB2	0.149452	0.454241
1306	BDNF	0.241719	0.203391
1307	BDP1	0.202139	0.544818
1308	BEAN1	-0.00642374	0.151683
1309	BECN1	-0.133334	0.482744
1310	BEGAIN	0.238409	0.217376
1311	BEND3	0.254368	0.545382
1312	BEND4	-0.122388	1.00758
1313	BEND5	0.219073	0.406646
1314	BEND6	0.251863	0.210837
1315	BEND7	0.187185	0.367239
1316	BEST1	0.2732	0.199346
1317	BEST4	-0.0403037	0.130387
1318	BET1	0.200694	0.271861
1319	BET1L	0.00417168	0.237588
1320	BEX1	0.173674	1.03941
1321	BEX2	0.132981	0.696669
1322	BEX3	0.128006	0.432355
1323	BEX4	0.16652	0.481481
1324	BEX5	0.066199	1.0313
1325	BFAR	0.0545685	0.264751
1326	BFSP1	0.121819	0.198659
1327	BFSP2	0.0888747	0.0645193
1328	BGLAP	-0.11697	0.376959
1329	BGN	0.0817551	0.955839
1330	BHLHA15	-0.228004	1.0724
1331	BHLHE22	0.102402	0.156483
1332	BHLHE40	0.20175	1.11855
1333	BHLHE41	0.35098	0.859522
1334	BHMT	0.374147	0.0600329
1335	BHMT2	0.406691	0.562479
1336	BICC1	0.038583	0.625191
1337	BICD1	0.207457	0.761132
1338	BICD2	0.211103	0.415222
1339	BICDL1	0.242498	0.490949
1340	BICDL2	-0.11896	0.596524
1341	BICRA	-0.0611497	0.333433
1342	BICRAL	0.17539	0.467851
1343	BID	-0.119306	0.307709
1344	BIK	0.273445	0.619556
1345	BIN1	0.351176	0.522434
1346	BIN2	0.44526	0.495966
1347	BIN3	0.25157	0.318822
1348	BIRC2	0.0391884	0.429086
1349	BIRC3	0.238215	0.851038
1350	BIRC5	0.338371	0.694133
1351	BIRC6	0.156861	0.48885
1352	BIRC7	-0.0610248	0.20217
1353	BISPR	0.275259	0.359126
1354	BIVM	-0.0744572	0.291986
1355	BLACAT1	0.130174	0.0673151
1356	BLCAP	-0.220282	0.31126
1357	BLK	0.123492	0.361894
1358	BLM	0.379751	0.217913
1359	BLMH	-0.0252973	0.354928
1360	BLNK	0.120225	0.390919
1361	BLOC1S1	0.129371	0.644699
1362	BLOC1S2	-0.0937103	0.347267
1363	BLOC1S3	-2.17619e-05	0.255
1364	BLOC1S4	-0.033612	0.31953
1365	BLOC1S5	-0.0459912	0.23156
1366	BLOC1S6	-0.199616	0.533829
1367	BLVRA	0.0764013	0.445669
1368	BLVRB	0.144383	0.568402
1369	BLZF1	0.208103	0.374467
1370	BMERB1	0.440581	0.595018
1371	BMF	0.0310396	0.559112
1372	BMI1	-0.0468321	0.395046
1373	BMP1	0.402794	0.4075
1374	BMP2	0.289554	0.548951
1375	BMP2K	0.311406	0.24981
1376	BMP4	0.366787	0.694437
1377	BMP5	-0.000334564	0.817819
1378	BMP6	0.0696737	0.878391
1379	BMP7	0.298583	0.838564
1380	BMP8A	-0.110205	0.38406
1381	BMP8B	-0.112267	0.435429
1382	BMPER	0.483976	0.480115
1383	BMPR1A	0.0841177	0.458084
1384	BMPR1B	0.0486782	0.763869
1385	BMPR2	0.0721641	0.596706
1386	BMS1	0.0410154	0.331511
1387	BMS1P4	-0.171143	0.142445
1388	BMX	-0.0386813	0.508058
1389	BNC1	0.143	0.135376
1390	BNC2	0.490677	0.342937
1391	BNIP1	-0.0341442	0.326381
1392	BNIP2	0.136025	0.391936
1393	BNIP3	0.0994082	0.454472
1394	BNIP3L	0.176438	0.535854
1395	BNIPL	0.0671378	0.688394
1396	BOC	0.512006	0.646933
1397	BOD1	-0.139919	0.324181
1398	BOD1L1	0.145923	0.499505
1399	BOK	-0.11403	0.586634
1400	BOLA1	0.308499	0.404891
1401	BOLA2B	-0.168331	0.251822
1402	BOLA3	0.156684	0.344603
1403	BOP1	0.171501	0.606236
1404	BORA	0.250647	0.201712
1405	BORCS5	-0.145031	0.24382
1406	BORCS6	0.133977	0.442787
1407	BORCS7	-0.163804	0.463868
1408	BORCS8	-0.0145684	0.348164
1409	BPGM	0.0436946	0.354259
1410	BPHL	0.272473	0.358553
1411	BPI	0.207784	0.12105
1412	BPNT1	0.111747	0.361584
1413	BPNT2	0.0563292	0.480832
1414	BPTF	0.378909	0.504174
1415	BRAF	0.395042	0.317145
1416	BRAP	-0.102876	0.203873
1417	BRAT1	0.185555	0.396662
1418	BRCA1	0.280223	0.299792
1419	BRCA2	0.340356	0.163627
1420	BRCC3	-0.0110747	0.420424
1421	BRD1	-0.0130074	0.333384
1422	BRD2	0.148684	0.426553
1423	BRD3	0.0803116	0.562735
1424	BRD3OS	0.0195653	0.312238
1425	BRD4	-0.156761	0.299384
1426	BRD7	-0.161833	0.252587
1427	BRD8	0.00349997	0.346383
1428	BRD9	-0.0347198	0.25255
1429	BRF1	0.114475	0.244426
1430	BRF2	-0.0289712	0.368944
1431	BRI3	-0.047118	0.45001
1432	BRI3BP	0.13221	0.442136
1433	BRICD5	0.081789	0.465017
1434	BRINP1	0.253171	0.614634
1435	BRINP2	0.447612	0.0386761
1436	BRIP1	0.39895	0.191167
1437	BRIX1	0.229688	0.290764
1438	BRK1	0.0825837	0.2758
1439	BRMS1	-0.0181456	0.422335
1440	BRMS1L	0.0665809	0.28324
1441	BROX	0.160847	0.422856
1442	BRPF1	-0.0328185	0.319128
1443	BRPF3	-0.0994088	0.609184
1444	BRSK1	0.253902	0.601292
1445	BRSK2	0.0735183	0.813603
1446	BRWD1	0.00388619	0.39217
1447	BRWD3	0.149877	0.309382
1448	BSCL2	0.0662591	0.166303
1449	BSDC1	0.091042	0.267094
1450	BSG	0.2565	0.425367
1451	BSN	0.258304	0.13684
1452	BSPRY	-0.0213762	0.411214
1453	BST1	0.170994	0.269203
1454	BST2	0.222116	1.11341
1455	BTAF1	0.0680712	0.596964
1456	BTBD1	-0.148474	0.373888
1457	BTBD10	0.20127	0.288844
1458	BTBD16	-0.179364	0.214946
1459	BTBD18	-0.198452	0.0298166
1460	BTBD19	0.368597	0.325171
1461	BTBD2	0.17925	0.322738
1462	BTBD3	-0.020744	0.471944
1463	BTBD6	0.124583	0.328657
1464	BTBD7	0.114294	0.383765
1465	BTBD8	-0.0887227	0.316549
1466	BTBD9	0.114626	0.327079
1467	BTC	-0.0397714	0.362859
1468	BTD	-0.228073	0.438721
1469	BTF3	0.00744608	0.442466
1470	BTF3L4	0.170927	0.275985
1471	BTG1	0.171433	0.455017
1472	BTG2	0.299818	1.08301
1473	BTG3	0.134355	0.596959
1474	BTK	0.317202	0.400128
1475	BTLA	0.258968	0.271744
1476	BTN2A1	0.242953	0.37543
1477	BTN2A2	0.30464	0.397784
1478	BTN3A1	0.185154	0.59012
1479	BTN3A2	0.205594	0.682629
1480	BTN3A3	0.285853	0.565775
1481	BTNL8	0.0455098	0.0364206
1482	BTNL9	0.180575	0.392579
1483	BTRC	-0.14237	0.415692
1484	BUB1	0.315955	0.470981
1485	BUB1B	0.354809	0.435451
1486	BUB3	0.0812167	0.310075
1487	BUD13	-0.00509976	0.269312
1488	BUD23	0.0531815	0.32305
1489	BUD31	-0.0589026	0.287964
1490	BYSL	-0.0600363	0.34916
1491	BZW1	-0.0450596	0.464922
1492	BZW2	0.100331	0.516229
1493	C10orf143	0.072422	0.20963
1494	C10orf55	0.0866903	0.0650661
1495	C10orf67	0.00733168	0.0180061
1496	C10orf88	0.267262	0.236813
1497	C11orf16	0.0292079	0.164737
1498	C11orf21	0.158347	0.196649
1499	C11orf24	-0.116562	0.323088
1500	C11orf42		0.323088
1501	C11orf54	0.00357845	0.380366
1502	C11orf58	-0.0664892	0.29188
1503	C11orf65	0.149567	0.0860521
1504	C11orf68	0.17944	0.306127
1505	C11orf71	-0.149916	0.541648
1506	C11orf91	-0.118943	0.0818753
1507	C11orf96	0.518667	1.07253
1508	C12orf42	-0.12578	0.0539142
1509	C12orf43	0.0155594	0.165263
1510	C12orf56	0.0269419	0.504542
1511	C12orf57	0.238689	0.730023
1512	C12orf60	0.139053	0.473131
1513	C12orf71		0.473131
1514	C12orf75	0.198091	0.765978
1515	C12orf76	0.0687158	0.25853
1516	C13orf46	0.148286	0.582009
1517	C14orf119	-0.137875	0.232069
1518	C14orf132	0.288566	0.605219
1519	C14orf28	0.187739	0.223783
1520	C14orf93	0.000742118	0.248963
1521	C15orf39	0.155907	0.47976
1522	C15orf40	0.0102607	0.171752
1523	C15orf48	0.176405	1.61013
1524	C15orf61	0.367588	0.258742
1525	C15orf62	-0.109392	0.220574
1526	C16orf54	0.375251	0.599242
1527	C16orf74	0.0286466	0.457392
1528	C16orf86	0.0533552	0.362919
1529	C16orf87	0.189797	0.28134
1530	C16orf89	0.149753	0.685632
1531	C16orf95	0.296244	0.128085
1532	C16orf96	0.0394737	0.123455
1533	C17orf100	0.246743	0.305538
1534	C17orf107	-0.0475578	0.317093
1535	C17orf113	-0.131535	0.30656
1536	C17orf58	0.227041	0.533914
1537	C17orf67	0.127048	0.281902
1538	C17orf75	0.110443	0.250043
1539	C17orf78	-0.0669312	0.104283
1540	C17orf99	-0.0834678	0.0758195
1541	C18orf21	0.0329004	0.332361
1542	C18orf32	-0.183193	0.197164
1543	C18orf54	0.200936	0.1817
1544	C19orf12	0.167897	0.20829
1545	C19orf18	-0.112724	0.616288
1546	C19orf25	0.0231823	0.347957
1547	C19orf38	0.187419	0.354261
1548	C19orf44	0.0420566	0.22149
1549	C19orf47	0.0401874	0.213712
1550	C19orf53	0.0832215	0.452986
1551	C19orf67	-0.0415652	0.0917241
1552	C19orf73	0.126261	0.529808
1553	C19orf81	-0.0510981	0.980364
1554	C19orf84	-0.0722063	0.0531091
1555	C1D	-0.0277001	0.351568
1556	C1GALT1	0.144145	0.36355
1557	C1GALT1C1	-0.153773	0.41071
1558	C1GALT1C1L	0.246098	0.37036
1559	C1QA	0.16117	0.890164
1560	C1QB	0.108561	0.895903
1561	C1QBP	0.137652	0.428119
1562	C1QC	0.0514407	0.866609
1563	C1QL1	0.194436	0.388506
1564	C1QL3	-0.13421	0.421485
1565	C1QL4	-0.0447746	0.0726534
1566	C1QTNF1	0.454855	0.720268
1567	C1QTNF12	-0.0245752	0.260458
1568	C1QTNF2	0.303127	0.384875
1569	C1QTNF3	0.134521	0.970915
1570	C1QTNF4	0.318948	0.286736
1571	C1QTNF6	-0.00348414	0.405784
1572	C1QTNF7	0.36602	0.563977
1573	C1R	0.289372	0.933667
1574	C1RL	0.118209	0.709938
1575	C1S	0.330291	0.956144
1576	C1orf115	0.108112	0.792103
1577	C1orf116	-0.0240621	0.575438
1578	C1orf122	-0.00844034	0.563687
1579	C1orf127	0.024812	0.107095
1580	C1orf131	0.113882	0.292385
1581	C1orf146	-0.135411	0.0781913
1582	C1orf159	-0.0236802	0.369125
1583	C1orf162	0.0517337	0.420715
1584	C1orf174	-0.0901458	0.260187
1585	C1orf198	0.0729246	0.392495
1586	C1orf21	0.0525785	0.519077
1587	C1orf210	-0.106714	0.424839
1588	C1orf216	0.103145	0.328831
1589	C1orf220	-0.0767272	0.165317
1590	C1orf226	-0.191409	0.508281
1591	C1orf35	0.0620644	0.414759
1592	C1orf43	0.10832	0.324777
1593	C1orf50	-0.209839	0.270234
1594	C1orf52	0.252635	0.255169
1595	C1orf53	-0.0923846	0.546765
1596	C1orf54	0.324434	0.626743
1597	C1orf56	0.245892	0.352114
1598	C1orf74	0.0623125	0.378603
1599	C2	0.161241	0.621352
1600	C20orf144	0.115505	0.241768
1601	C20orf202	0.214657	0.063698
1602	C20orf204	0.196329	0.200348
1603	C20orf96	0.0769473	0.544441
1604	C21orf58	0.237974	0.359526
1605	C21orf91	0.193502	0.365415
1606	C22orf15	-0.126683	0.149433
1607	C22orf23	0.0236258	0.358561
1608	C22orf31	0.0578559	0.166288
1609	C22orf39	0.195364	0.27751
1610	C2CD2	-0.083987	0.386201
1611	C2CD2L	0.081297	0.339106
1612	C2CD3	0.204802	0.342698
1613	C2CD4A	0.0971032	0.669665
1614	C2CD4B	0.113943	0.692187
1615	C2CD4C	0.12761	0.536811
1616	C2CD4D	0.0835125	0.439367
1617	C2CD5	0.108012	0.410045
1618	C2CD6	0.0671928	0.0972381
1619	C2orf15	0.177325	0.348632
1620	C2orf42	-0.0814604	0.182446
1621	C2orf49	0.0469237	0.337452
1622	C2orf66	-0.0830564	0.143771
1623	C2orf68	0.0311529	0.240465
1624	C2orf69	-0.061222	0.466334
1625	C2orf72	0.203845	1.21642
1626	C2orf74	0.312395	0.182341
1627	C2orf76	0.350347	0.341425
1628	C2orf81	0.00347007	0.205305
1629	C2orf88	0.367807	0.465836
1630	C2orf92	0.199555	0.242089
1631	C3	0.160221	1.31324
1632	C3AR1	0.338024	0.538255
1633	C3orf18	0.267937	0.423152
1634	C3orf20	-0.102173	0.0654974
1635	C3orf33	0.015235	0.235471
1636	C3orf38	0.236159	0.33227
1637	C3orf49	0.0348802	0.0547648
1638	C3orf52	0.154837	0.392266
1639	C3orf62	0.0891332	0.298326
1640	C3orf70	0.451513	0.587361
1641	C3orf80	0.0547511	0.342024
1642	C4A	0.0523905	0.991412
1643	C4B	0.130291	1.0223
1644	C4BPA	-0.0600015	0.204854
1645	C4BPB	-0.12509	0.0543326
1646	C4orf19	0.0130258	0.513529
1647	C4orf3	0.00901534	0.331715
1648	C4orf33	0.192787	0.28581
1649	C4orf46	0.130211	0.317786
1650	C4orf50	0.151718	0.102279
1651	C5	0.00430416	0.542641
1652	C5AR1	0.029515	0.661214
1653	C5AR2	0.10557	0.0964929
1654	C5orf15	0.0835624	0.446319
1655	C5orf22	0.0768736	0.413361
1656	C5orf24	0.0147436	0.569584
1657	C5orf34	0.244049	0.218861
1658	C5orf58	0.0795551	0.0598024
1659	C5orf63	0.281097	0.246353
1660	C6	-0.00322233	0.385737
1661	C6orf120	-0.052222	0.52525
1662	C6orf132	0.0301129	0.4317
1663	C6orf136	0.116577	0.310794
1664	C6orf141	0.0385115	0.325712
1665	C6orf163	0.0974573	0.226348
1666	C6orf226	-0.0240392	0.60881
1667	C6orf47	0.141773	0.239743
1668	C6orf52	-0.028242	0.51148
1669	C6orf58	0.146941	0.0991485
1670	C6orf62	0.151035	0.351197
1671	C6orf89	-0.0836802	0.313534
1672	C7	0.350826	1.16154
1673	C7orf25	-0.100623	0.0930152
1674	C7orf50	0.0377066	0.452804
1675	C7orf57	-0.0406282	0.247564
1676	C8G	0.220711	0.317585
1677	C8orf33	0.279767	0.389954
1678	C8orf48	0.330892	0.10651
1679	C8orf58	0.10141	0.341469
1680	C8orf76	-0.0329283	0.362367
1681	C8orf82	0.091685	0.583424
1682	C8orf88	0.455834	0.545094
1683	C9orf152	-0.126827	0.653872
1684	C9orf153	0.025073	0.0911544
1685	C9orf163	0.204973	0.266311
1686	C9orf40	-0.0342656	0.348363
1687	C9orf43	0.214569	0.210366
1688	C9orf50	0.0219808	0.0801305
1689	C9orf72	-0.0803344	0.474112
1690	C9orf78	0.0808737	0.266073
1691	C9orf85	0.1666	0.287147
1692	CA11	0.399518	0.675482
1693	CA12	0.224363	0.588741
1694	CA13	0.0814543	0.565015
1695	CA14	0.322008	0.493049
1696	CA2	0.179129	0.67247
1697	CA3	0.0743628	1.18507
1698	CA4	-0.0583492	0.425929
1699	CA5B	0.113265	0.436329
1700	CA8	-0.0300738	0.521562
1701	CA9	-0.0553804	0.18069
1702	CAAP1	0.0165659	0.380421
1703	CAB39	-0.0987742	0.456048
1704	CAB39L	-0.0552051	0.615338
1705	CABCOCO1	0.0227036	0.763228
1706	CABIN1	0.0910645	0.335721
1707	CABLES1	0.318914	0.341464
1708	CABLES2	0.309682	0.312854
1709	CABP1	0.317841	0.169813
1710	CABP4	0.216393	0.418746
1711	CABP7	-0.0254471	0.0773154
1712	CABYR	0.401547	0.176773
1713	CACFD1	0.239989	0.451457
1714	CACHD1	0.414795	0.607986
1715	CACNA1A	-0.183763	0.0792981
1716	CACNA1C	0.325756	0.446333
1717	CACNA1D	0.0290429	1.17072
1718	CACNA1E	0.0779863	0.0314006
1719	CACNA1F	0.249364	0.0384467
1720	CACNA1G	0.0186879	0.484687
1721	CACNA1H	0.264683	0.883487
1722	CACNA1I	-0.116299	0.201085
1723	CACNA1S	-0.0531887	0.157959
1724	CACNA2D1	0.145839	0.866798
1725	CACNA2D2	-0.181668	0.446836
1726	CACNA2D3	0.275203	0.335068
1727	CACNA2D4	0.023403	0.126643
1728	CACNB1	-0.113204	0.379221
1729	CACNB2	0.135934	0.280988
1730	CACNB3	0.150137	0.442536
1731	CACNB4	0.171401	0.204167
1732	CACNG4	0.117666	1.24829
1733	CACNG8	0.0588416	0.0426465
1734	CACTIN	-0.0242346	0.24832
1735	CACUL1	0.0371678	0.307088
1736	CACYBP	-0.0491952	0.332826
1737	CAD	0.113637	0.43024
1738	CADM1	-0.037628	0.695195
1739	CADM2	-0.0112401	0.610855
1740	CADM3	0.179754	0.387383
1741	CADM4	0.0864435	0.44824
1742	CADPS	0.130072	0.867854
1743	CADPS2	-0.115601	0.580392
1744	CAGE1	0.0920719	0.0436347
1745	CAHM	-0.0399608	0.412784
1746	CALB1	-0.182711	0.0582205
1747	CALB2	0.00368592	0.191776
1748	CALCB	0.324346	0.0995609
1749	CALCOCO1	0.0398848	0.386657
1750	CALCOCO2	0.026092	0.292446
1751	CALCR	-0.0537349	0.0306386
1752	CALCRL	0.15713	0.696561
1753	CALD1	0.473615	0.8445
1754	CALHM2	0.408269	0.518188
1755	CALHM5	0.235842	0.24857
1756	CALHM6	0.301546	0.311794
1757	CALM1	0.349587	0.48247
1758	CALM2	0.0253525	0.296795
1759	CALM3	0.0734091	0.281878
1760	CALML4	0.127889	0.0360712
1761	CALML6	-0.0553224	0.305835
1762	CALN1	0.0317662	0.28949
1763	CALR	0.215398	0.433272
1764	CALU	-0.0132851	0.545739
1765	CALY	-0.0242151	0.151426
1766	CAMK1	-0.107635	0.426707
1767	CAMK1D	0.353855	0.586943
1768	CAMK1G	0.387423	0.342204
1769	CAMK2A	0.0679729	0.230391
1770	CAMK2B	0.105113	0.7062
1771	CAMK2D	0.0226847	0.577532
1772	CAMK2G	0.37281	0.435762
1773	CAMK2N1	0.0868273	1.07047
1774	CAMK2N2	0.304268	0.575421
1775	CAMK4	0.292055	0.43423
1776	CAMKK1	0.0510936	0.43253
1777	CAMKK2	0.292083	0.867061
1778	CAMKMT	-0.337578	0.233858
1779	CAMLG	0.138999	0.261172
1780	CAMP	0.0477151	0.296258
1781	CAMSAP1	0.0562736	0.416099
1782	CAMSAP2	0.1105	0.431161
1783	CAMSAP3	0.227822	0.419993
1784	CAMTA1	-0.150248	0.229079
1785	CAMTA2	-0.134363	0.413301
1786	CAND1	0.156189	0.416277
1787	CAND2	0.397955	0.427277
1788	CANT1	0.0799022	0.513031
1789	CANX	0.0423615	0.546146
1790	CAP1	0.0224476	0.315443
1791	CAP2	0.484752	0.688334
1792	CAPG	0.026645	0.919738
1793	CAPN1	0.0425556	0.386118
1794	CAPN10	-0.0791362	0.337324
1795	CAPN11	-0.00121156	0.110639
1796	CAPN12	-0.0977495	0.215215
1797	CAPN13	0.219824	0.538501
1798	CAPN14	-0.0701451	0.119668
1799	CAPN15	0.0450612	0.385487
1800	CAPN2	0.178619	0.595206
1801	CAPN3	0.159106	0.166955
1802	CAPN5	-0.12151	0.846638
1803	CAPN6	0.503935	0.815807
1804	CAPN7	0.158728	0.375655
1805	CAPN8	-0.000389297	0.458059
1806	CAPN9	0.00111259	0.554738
1807	CAPNS1	0.154301	0.322414
1808	CAPRIN1	0.0204743	0.507183
1809	CAPRIN2	0.179634	0.331291
1810	CAPS	0.0563606	0.793186
1811	CAPS2	0.148384	0.255746
1812	CAPZA1	0.134553	0.393099
1813	CAPZA2	-0.0446027	0.467431
1814	CAPZB	0.185178	0.270109
1815	CARD10	-0.0468399	0.450742
1816	CARD11	0.378497	0.489669
1817	CARD14	-0.215695	0.258057
1818	CARD16	-0.140473	0.521309
1819	CARD19	-0.125889	0.353944
1820	CARD6	0.346308	0.35397
1821	CARD8	0.29427	0.252266
1822	CARD9	-0.13969	0.286386
1823	CARF	0.159332	0.256397
1824	CARHSP1	-0.0421193	0.360204
1825	CARM1	-0.0583803	0.438006
1826	CARMIL1	0.305434	0.476093
1827	CARMIL2	0.075275	0.346916
1828	CARMIL3	-0.0188763	0.127815
1829	CARNMT1	0.0912399	0.388995
1830	CARNS1	0.167316	0.215692
1831	CARS1	-0.0075351	0.276765
1832	CARS2	-0.124372	0.354833
1833	CASC11	-0.00389106	0.219399
1834	CASC18	0.0129833	0.0818172
1835	CASC2	0.172639	0.125306
1836	CASC3	-0.118627	0.309757
1837	CASC8	-0.0420346	0.35056
1838	CASC9	0.0564801	0.230068
1839	CASD1	0.150179	0.499512
1840	CASK	0.0859333	0.291624
1841	CASKIN1	0.186994	0.392762
1842	CASKIN2	0.088349	0.359695
1843	CASP1	0.164657	0.592818
1844	CASP10	0.182652	0.462744
1845	CASP2	0.253532	0.533947
1846	CASP3	0.277752	0.335806
1847	CASP4	0.190245	0.460464
1848	CASP5	-0.0277585	0.0590834
1849	CASP6	0.0411302	0.359371
1850	CASP7	0.00358584	0.601123
1851	CASP8	0.151167	0.473762
1852	CASP8AP2	0.16571	0.47084
1853	CASP9	-0.0318782	0.266281
1854	CASQ1	0.39749	0.787964
1855	CASQ2	0.302988	0.790956
1856	CASR	-0.103751	0.0187921
1857	CASS4	0.117657	0.22315
1858	CAST	0.0661522	0.473621
1859	CASTOR1	0.127735	0.129993
1860	CASTOR2	0.0839214	0.367541
1861	CASZ1	0.123947	0.456721
1862	CAT	-0.0296485	0.560786
1863	CATIP	0.0394246	0.286939
1864	CATSPER1	0.0771162	0.0744384
1865	CATSPER2	0.219168	0.252355
1866	CATSPER3	0.108169	0.189346
1867	CATSPERB	-0.210494	0.305579
1868	CATSPERE	0.0693545	0.127606
1869	CATSPERG	-0.0854233	0.186808
1870	CAV1	0.414534	0.956118
1871	CAV2	0.35685	0.669912
1872	CAVIN1	0.422053	0.821025
1873	CAVIN2	0.414614	0.850693
1874	CAVIN3	0.326694	0.684631
1875	CAVIN4	-0.0818602	0.381448
1876	CBARP	-0.0890372	0.23148
1877	CBFA2T2	-0.0566562	0.541189
1878	CBFA2T3	-0.0415493	0.477812
1879	CBFB	0.0286699	0.475649
1880	CBL	-0.0155115	0.438856
1881	CBLB	0.176222	0.351571
1882	CBLC	-0.170351	0.916397
1883	CBLL1	-0.0155322	0.592995
1884	CBLN1	0.0145856	0.253765
1885	CBLN3	-0.0498811	0.414181
1886	CBLN4	0.0438673	0.0977268
1887	CBR1	0.104585	0.543203
1888	CBR3	0.112967	0.787141
1889	CBR4	0.0268401	0.544405
1890	CBS	0.119576	0.487383
1891	CBX1	-0.0586751	0.337926
1892	CBX2	0.275312	0.560728
1893	CBX3	0.12245	0.43905
1894	CBX4	0.00892559	0.528181
1895	CBX5	0.0424828	0.443972
1896	CBX6	0.0776809	0.525309
1897	CBX7	0.279643	0.501553
1898	CBX8	0.308291	0.419718
1899	CBY1	0.0281274	0.39867
1900	CBY3	0.177768	0.128577
1901	CC2D1A	-0.0188924	0.318053
1902	CC2D1B	-0.0345273	0.22502
1903	CC2D2A	0.227308	0.372996
1904	CC2D2B	0.312709	0.0838597
1905	CCAR1	0.230667	0.371246
1906	CCAR2	0.222131	0.343225
1907	CCBE1	0.412946	0.351143
1908	CCDC102A	0.172937	0.446819
1909	CCDC102B	-0.130916	0.243684
1910	CCDC106	0.219419	0.421808
1911	CCDC107	0.200038	0.47724
1912	CCDC110	-0.00497396	0.472156
1913	CCDC112	0.101893	0.436803
1914	CCDC115	0.130255	0.292696
1915	CCDC116	0.0668977	0.106766
1916	CCDC117	-0.0960741	0.426388
1917	CCDC12	-0.321153	0.388626
1918	CCDC120	-0.0589159	0.358683
1919	CCDC121	0.0832249	0.354147
1920	CCDC122	0.0401454	0.315275
1921	CCDC124	-0.0424582	0.511243
1922	CCDC125	0.0583298	0.468787
1923	CCDC126	0.108253	0.363757
1924	CCDC127	0.0658495	0.180085
1925	CCDC13	-0.104882	0.0586346
1926	CCDC134	-0.0240071	0.407632
1927	CCDC136	0.229511	0.507841
1928	CCDC137	-0.0697417	0.377994
1929	CCDC138	-0.0247871	0.342815
1930	CCDC14	0.19343	0.466303
1931	CCDC141	0.471386	0.382269
1932	CCDC142	0.177704	0.306964
1933	CCDC144A	-0.213076	0.254724
1934	CCDC146	0.0494233	0.41163
1935	CCDC148	0.172995	0.134582
1936	CCDC149	-0.0872172	0.316181
1937	CCDC15	0.0796199	0.339715
1938	CCDC150	0.129202	0.075713
1939	CCDC152	0.129023	0.191463
1940	CCDC154	-0.000921748	0.737425
1941	CCDC157	-0.00440457	0.22313
1942	CCDC158	0.409228	0.146956
1943	CCDC159	-0.00522553	0.535591
1944	CCDC163	-0.0569737	0.484621
1945	CCDC167	0.178441	0.542751
1946	CCDC168	-0.0259499	0.0157627
1947	CCDC17	-0.135933	0.441626
1948	CCDC170	0.146808	0.343402
1949	CCDC171	0.330033	0.137431
1950	CCDC174	-0.114904	0.201359
1951	CCDC18	0.373259	0.153439
1952	CCDC180	0.00104564	0.127895
1953	CCDC181	0.293975	0.172143
1954	CCDC183	0.155032	0.340488
1955	CCDC184	0.257516	0.329768
1956	CCDC186	-0.0505257	0.705445
1957	CCDC187	-0.018994	0.281493
1958	CCDC188	-0.13404	0.271547
1959	CCDC191	-0.0240442	0.301129
1960	CCDC192	-0.0530612	0.103262
1961	CCDC194	0.147938	0.244031
1962	CCDC196	0.09921	0.0372231
1963	CCDC200	-0.0564031	0.130273
1964	CCDC22	0.278766	0.328315
1965	CCDC24	-0.00384641	0.512785
1966	CCDC25	0.0540686	0.360858
1967	CCDC26	0.0338902	0.0774772
1968	CCDC28A	0.180548	0.441129
1969	CCDC28B	-0.174019	0.388127
1970	CCDC3	0.477676	0.73727
1971	CCDC30	0.21239	0.121268
1972	CCDC32	0.0986357	0.227319
1973	CCDC34	0.394695	0.359451
1974	CCDC38	0.0356727	0.0245306
1975	CCDC39	-0.0161322	0.0392903
1976	CCDC40	0.177014	0.392691
1977	CCDC43	-0.133251	0.299713
1978	CCDC47	0.0667846	0.455107
1979	CCDC50	0.0330748	0.508148
1980	CCDC51	0.160627	0.34696
1981	CCDC57	-0.0543315	0.425635
1982	CCDC59	0.166356	0.24262
1983	CCDC6	0.0782748	0.583171
1984	CCDC61	-0.0164785	0.390613
1985	CCDC62	0.201888	0.0900188
1986	CCDC65	-0.085862	0.318653
1987	CCDC66	0.219982	0.275432
1988	CCDC68	0.204295	0.48238
1989	CCDC69	0.367992	0.710967
1990	CCDC7	0.073175	0.154865
1991	CCDC71	-0.134463	0.289968
1992	CCDC71L	0.288066	0.430582
1993	CCDC73	0.234202	0.0449942
1994	CCDC74A	-0.0231139	0.828519
1995	CCDC74B	0.1687	0.68544
1996	CCDC77	0.293511	0.269185
1997	CCDC78	0.222743	0.751972
1998	CCDC8	0.36933	0.69161
[truncated: 14,060 more rows]

## Sheet: ProGENIE(UNI)
	gene	pcc	rmse
0	A1BG	0.00598839	0.0539896
1	A2M	0.236267	0.955696
2	A2ML1	0.283217	0.355853
3	A4GALT	0.477596	0.55282
4	AAAS	-0.112968	0.324311
5	AACS	0.478603	0.341628
6	AADAT	0.227673	0.749819
7	AAGAB	0.407074	0.300849
8	AAK1	0.0998411	0.459705
9	AAMDC	0.0225651	0.371796
10	AAMP	0.320898	0.380888
11	AANAT	-0.0435703	0.046219
12	AAR2	0.0709679	0.318765
13	AARD	0.0831473	0.278519
14	AARS1	0.305834	0.391479
15	AARS2	-0.120383	0.269535
16	AARSD1	0.19473	0.231009
17	AASDH	-0.0184685	0.341861
18	AASDHPPT	0.0517104	0.342945
19	AASS	-0.0850733	0.480054
20	AATBC	0.314865	0.393425
21	AATF	0.122467	0.289854
22	AATK	-0.0986918	0.490231
23	ABAT	0.401763	0.743605
24	ABCA1	0.0660543	0.60634
25	ABCA10	0.0556313	0.155777
26	ABCA12	0.0283249	0.182409
27	ABCA13	-0.109714	0.0386944
28	ABCA2	0.521672	0.453641
29	ABCA3	0.277637	0.474316
30	ABCA4	0.00639796	0.0997336
31	ABCA5	-0.171964	0.430828
32	ABCA6	0.335225	0.179073
33	ABCA7	0.142229	0.471468
34	ABCA8	0.408322	0.505783
35	ABCA9	0.0670422	0.203979
36	ABCB1	0.306956	0.568142
37	ABCB10	0.047892	0.403209
38	ABCB11	0.0447204	0.0751979
39	ABCB4	0.298308	0.105648
40	ABCB5	0.0723116	0.219224
41	ABCB6	0.135785	0.137009
42	ABCB7	0.0320381	0.283226
43	ABCB8	0.320051	0.338794
44	ABCB9	0.108121	0.151926
45	ABCC1	-0.138154	0.504414
46	ABCC10	0.0297399	0.380796
47	ABCC11	0.179313	0.983341
48	ABCC2	0.443017	0.0973141
49	ABCC3	0.51753	0.592542
50	ABCC4	0.315371	1.01569
51	ABCC5	0.383914	0.545907
52	ABCC6	0.4013	0.454452
53	ABCC8	-0.0044102	0.45575
54	ABCC9	0.5756	0.457915
55	ABCD1	0.303892	0.345492
56	ABCD2	0.422213	0.105651
57	ABCD3	0.145831	0.362945
58	ABCD4	-0.00408252	0.315284
59	ABCE1	0.379471	0.394119
60	ABCF1	0.0687359	0.390486
61	ABCF2	0.151243	0.291107
62	ABCF3	0.3296	0.239362
63	ABCG1	0.380667	0.519858
64	ABCG2	0.594277	0.46904
65	ABCG4	0.46626	0.0400432
66	ABCG5		0.0400432
67	ABCG8	0.068088	0.0439138
68	ABHD1	0.368482	0.372116
69	ABHD10	0.408834	0.431343
70	ABHD11	-0.0867678	0.634376
71	ABHD12	0.0974725	0.685683
72	ABHD12B	-0.0465707	0.0554314
73	ABHD13	0.228651	0.347044
74	ABHD14A	0.296214	0.540132
75	ABHD14B	0.397569	0.418281
76	ABHD15	0.154571	0.353497
77	ABHD16A	0.126767	0.217638
78	ABHD17A	-0.141748	0.410202
79	ABHD17B	0.0966189	0.491241
80	ABHD17C	0.370801	0.595358
81	ABHD18	0.0634208	0.30994
82	ABHD2	-0.00601296	0.999898
83	ABHD3	0.316988	0.430686
84	ABHD4	0.246938	0.402429
85	ABHD5	0.0762249	0.271223
86	ABHD6	0.627102	0.273359
87	ABHD8	-0.052113	0.453567
88	ABI1	0.0407428	0.405003
89	ABI2	-0.0786792	0.31422
90	ABI3	0.310463	0.540593
91	ABI3BP	0.357364	0.55984
92	ABITRAM	0.306558	0.351279
93	ABL1	0.0350612	0.446538
94	ABL2	0.0407313	0.304304
95	ABLIM1	0.218842	0.736091
96	ABLIM2	0.0132139	0.320508
97	ABLIM3	0.162803	0.524828
98	ABO	0.568971	0.666823
99	ABR	0.250926	0.39627
100	ABRACL	0.33042	0.653579
101	ABRAXAS1	0.258235	0.223714
102	ABRAXAS2	-0.0794155	0.316353
103	ABT1	0.0234599	0.303589
104	ABTB1	0.00364428	0.527101
105	ABTB2	0.100588	0.581098
106	ACAA1	0.352448	0.390655
107	ACAA2	0.536272	0.526389
108	ACACA	0.351969	0.641769
109	ACACB	0.614687	0.411101
110	ACAD10	0.213629	0.390574
111	ACAD11	-0.0733119	0.0901707
112	ACAD8	0.172556	0.866223
113	ACAD9	0.307801	0.295855
114	ACADL	0.584067	0.880359
115	ACADM	-0.00902178	0.5431
116	ACADS	0.263896	0.537036
117	ACADSB	-0.0797788	0.694871
118	ACADVL	0.245539	0.559465
119	ACAN	0.0500257	0.376093
120	ACAP1	0.333718	0.466289
121	ACAP2	0.107016	0.407601
122	ACAP3	0.0885129	0.490227
123	ACAT1	0.433949	0.485713
124	ACAT2	0.314647	0.599819
125	ACBD3	-0.173333	0.463474
126	ACBD4	-0.173404	0.491892
127	ACBD5	0.0457325	0.418388
128	ACBD6	0.25488	0.285601
129	ACBD7	0.321185	0.319361
130	ACCS	-0.293882	0.662523
131	ACD	-0.303946	0.449
132	ACE	0.322089	0.515013
133	ACE2	0.212225	0.0856151
134	ACER2	-0.125566	0.762236
135	ACER3	0.145201	0.74108
136	ACHE	0.257669	0.714068
137	ACIN1	-0.111505	0.414947
138	ACKR1	0.138147	1.12415
139	ACKR2	0.249974	0.307911
140	ACKR3	0.442973	0.686835
141	ACKR4	-0.0657052	0.0746739
142	ACLY	0.189201	0.647512
143	ACMSD	0.00812599	0.0440733
144	ACO1	0.371927	0.360693
145	ACO2	0.052304	0.429684
146	ACOT1	0.190662	0.500013
147	ACOT11	0.577464	0.29372
148	ACOT13	0.172918	0.323179
149	ACOT2	0.257265	0.490512
150	ACOT4	0.0964997	0.343996
151	ACOT7	-0.0311613	0.349436
152	ACOT8	0.327137	0.293116
153	ACOT9	0.168297	0.294877
154	ACOX1	0.270337	0.350046
155	ACOX2	0.526747	0.572189
156	ACOX3	0.314711	0.467709
157	ACOXL	0.314909	0.396097
158	ACP1	0.358858	0.311417
159	ACP2	0.568053	0.434673
160	ACP3	0.600512	1.27564
161	ACP4	0.0232688	0.313859
162	ACP5	0.330532	1.08522
163	ACP6	0.210176	0.360704
164	ACP7	0.379024	0.109164
165	ACR	0.146552	0.0960519
166	ACRBP	0.187927	0.30531
167	ACRV1	0.605347	0.270561
168	ACSBG1	0.25794	0.226733
169	ACSBG2	0.00853483	0.0667816
170	ACSF2	0.598597	0.640759
171	ACSF3	-0.201211	0.35127
172	ACSL1	0.0422107	0.704805
173	ACSL3	0.324024	0.747197
174	ACSL4	0.679249	0.471662
175	ACSL5	0.114962	1.11772
176	ACSL6	0.127446	0.076514
177	ACSM1	0.406241	1.71293
178	ACSM3	0.247094	0.861327
179	ACSM4	-0.150439	0.0395873
180	ACSM5	0.230005	0.109728
181	ACSS1	0.427806	0.471621
182	ACSS2	0.530157	0.299555
183	ACSS3	0.649829	0.294508
184	ACTA1	0.481586	1.4238
185	ACTA2	0.664075	0.87953
186	ACTB	0.358129	0.533321
187	ACTC1	0.692369	1.09788
188	ACTG1	0.201915	0.514473
189	ACTG2	0.678986	1.15031
190	ACTL6A	0.188131	0.43765
191	ACTN1	0.569589	0.571496
192	ACTN2	0.329721	0.871175
193	ACTN3	0.147743	0.0607672
194	ACTN4	0.512584	0.426111
195	ACTR10	0.372258	0.249085
196	ACTR1A	-0.153047	0.374159
197	ACTR1B	0.0359299	0.281453
198	ACTR2	0.0922975	0.528217
199	ACTR3	0.376077	0.35548
200	ACTR3B	0.443625	0.237615
201	ACTR3C	0.116989	0.200822
202	ACTR5	0.187312	0.283962
203	ACTR6	-0.0225218	0.317197
204	ACTR8	0.173834	0.355252
205	ACTRT3	0.269088	0.243196
206	ACVR1	0.201105	0.44472
207	ACVR1B	0.225413	0.435003
208	ACVR1C	0.0498749	0.0836646
209	ACVR2A	0.147666	0.374858
210	ACVR2B	0.179962	0.299031
211	ACVRL1	0.302151	0.493321
212	ACY1	0.288235	0.129587
213	ACY3	0.15035	0.767481
214	ACYP1	0.0161689	0.44287
215	ACYP2	0.0996097	0.279133
216	ADA	0.471071	0.322883
217	ADA2	0.466963	0.619451
218	ADAD2	0.226442	0.123036
219	ADAM10	0.0964762	0.543432
220	ADAM11	0.217549	0.266804
221	ADAM12	0.327019	0.235002
222	ADAM15	0.422155	0.360982
223	ADAM17	0.136012	0.308107
224	ADAM19	0.620236	0.402537
225	ADAM20	-0.128136	0.0581284
226	ADAM21	0.372598	0.30716
227	ADAM22	0.425684	0.541864
228	ADAM23	0.412798	0.238861
229	ADAM28	0.492792	0.425508
230	ADAM32	0.0344894	0.230777
231	ADAM33	0.627025	0.575779
232	ADAM8	0.174784	0.499546
233	ADAM9	-0.175113	0.794103
234	ADAMDEC1	0.245474	0.609846
235	ADAMTS1	0.622238	0.997264
236	ADAMTS10	0.495403	0.400635
237	ADAMTS12	0.366002	0.275924
238	ADAMTS13	0.288348	0.397501
239	ADAMTS14	0.191728	0.15866
240	ADAMTS15	0.586352	0.266189
241	ADAMTS16	-0.0502471	0.161997
242	ADAMTS17	0.17028	0.188349
243	ADAMTS18	0.0263485	0.128296
244	ADAMTS2	0.320359	0.65289
245	ADAMTS3	-0.139973	0.416024
246	ADAMTS4	0.308734	0.857905
247	ADAMTS5	0.644448	0.364905
248	ADAMTS6	0.0869582	0.231721
249	ADAMTS7	0.332929	0.195922
250	ADAMTS8	0.588631	0.438377
251	ADAMTS9	0.344856	0.512509
252	ADAMTSL1	0.247444	1.02883
253	ADAMTSL2	0.350449	0.53729
254	ADAMTSL3	0.403324	0.616196
255	ADAMTSL4	0.511499	0.352778
256	ADAMTSL5	0.151126	0.328116
257	ADAP1	-0.0784575	0.346771
258	ADAP2	0.283846	0.350559
259	ADAR	0.0649998	0.517979
260	ADARB1	0.0282662	0.382616
261	ADARB2	0.59238	0.549
262	ADAT1	0.0745602	0.423166
263	ADAT2	0.183219	0.418961
264	ADAT3	0.188904	0.381722
265	ADCK1	0.266513	0.279122
266	ADCK2	0.0733831	0.362891
267	ADCK5	0.243398	0.509991
268	ADCY1	-0.0177048	0.704374
269	ADCY10	0.0625361	0.136844
270	ADCY2	0.562486	0.474092
271	ADCY3	0.573138	0.480091
272	ADCY4	0.293928	0.411915
273	ADCY5	0.62573	0.577424
274	ADCY6	0.409325	0.545388
275	ADCY7	0.394248	0.296329
276	ADCY9	0.367093	0.373623
277	ADCYAP1	0.2887	0.267536
278	ADCYAP1R1	0.615361	0.201888
279	ADD1	0.368779	0.241251
280	ADD2	0.229613	0.442733
281	ADD3	0.353931	0.795123
282	ADGRA2	0.63992	0.776597
283	ADGRA3	-0.206818	0.3819
284	ADGRB1	0.205443	0.392784
285	ADGRB2	0.149526	0.356033
286	ADGRB3	0.553467	0.151458
287	ADGRD1	0.329575	0.379554
288	ADGRE1	0.373136	0.122391
289	ADGRE2	0.281504	0.261594
290	ADGRE3	0.185512	0.135934
291	ADGRE5	0.0839066	0.659359
292	ADGRF1	0.105904	1.18665
293	ADGRF3	-0.094255	0.105562
294	ADGRF5	0.0898056	1.38412
295	ADGRG1	0.0108093	0.580788
296	ADGRG2	0.404954	0.450597
297	ADGRG3	0.084481	0.135934
298	ADGRG5	0.424546	0.236181
299	ADGRG6	0.528407	0.592335
300	ADGRL1	0.300914	0.578527
301	ADGRL2	0.489609	0.572557
302	ADGRL3	0.578274	0.183496
303	ADGRL4	0.291091	0.542468
304	ADGRV1	0.113874	0.289253
305	ADH1B	0.350153	0.409762
306	ADH1C	0.0887658	0.807095
307	ADH5	0.637842	0.416771
308	ADH6	-0.157992	0.257545
309	ADHFE1	0.368074	0.52889
310	ADI1	0.449555	0.391553
311	ADIPOR1	0.203386	0.37917
312	ADIPOR2	0.0743589	0.354835
313	ADK	0.0386373	0.369556
314	ADM	0.125266	0.942781
315	ADM2	0.417885	0.666557
316	ADM5	-0.076613	0.357253
317	ADNP	-0.122357	0.475447
318	ADNP2	-0.168147	0.426763
319	ADO	0.0529211	0.286721
320	ADORA1	0.267082	0.165966
321	ADORA2A	0.0371455	0.0751173
322	ADORA2B	0.455553	0.360968
323	ADORA3	0.29393	0.353001
324	ADPGK	0.260685	0.573168
325	ADPRH	0.0382287	0.534321
326	ADPRHL1	-0.215468	0.499616
327	ADPRM	0.216569	0.602821
328	ADPRS	0.0942431	0.354212
329	ADRA1A	0.58644	0.373266
330	ADRA1B	0.373207	0.0970546
331	ADRA1D	0.524514	0.516924
332	ADRA2A	0.259547	0.916909
333	ADRA2B	0.378835	0.200862
334	ADRA2C	0.315447	0.842015
335	ADRB1	0.439724	0.703462
336	ADRB2	0.0555427	0.728877
337	ADRM1	0.351591	0.329503
338	ADSL	0.448726	0.156868
339	ADSS1	0.111325	0.345286
340	ADSS2	0.193797	0.472768
341	ADTRP	-0.00761726	0.370609
342	AEBP1	0.388647	0.89157
343	AEBP2	0.447254	0.334688
344	AEN	-0.0716366	0.474847
345	AFAP1	0.163459	0.258851
346	AFAP1L1	0.457555	0.32175
347	AFAP1L2	0.519074	0.573823
348	AFDN	-0.0780729	0.606451
349	AFF1	-0.239037	0.5281
350	AFF2	0.438981	0.13826
351	AFF3	0.369507	0.991282
352	AFF4	-0.0187487	0.518169
353	AFG1L	0.107903	0.190001
354	AFG3L2	0.0298386	0.433855
355	AFMID	0.531932	0.560261
356	AFTPH	-0.00890266	0.422713
357	AGA	0.396875	0.433157
358	AGAP1	0.270337	0.406661
359	AGAP2	0.193459	0.24672
360	AGAP3	0.0254598	0.400649
361	AGAP4	0.124082	0.337965
362	AGAP5	-0.0951029	0.0834517
363	AGAP6	0.412706	0.139254
364	AGAP9	-0.173853	0.495119
365	AGBL2	0.153499	0.208462
366	AGBL3	0.150993	0.198215
367	AGBL4	-0.15901	0.123759
368	AGBL5	0.178619	0.330695
369	AGER	0.0612423	0.627894
370	AGFG1	0.0510014	0.365277
371	AGFG2	0.259273	0.523771
372	AGGF1	0.198161	0.258826
373	AGK	0.447136	0.257899
374	AGL	0.234978	0.435316
375	AGMAT	0.458141	0.541363
376	AGMO	-0.00325974	0.252825
377	AGO1	-0.114807	0.311799
378	AGO2	0.271864	0.472476
379	AGO3	0.105276	0.290443
380	AGO4	0.352963	0.370982
381	AGPAT1	0.5759	0.296552
382	AGPAT2	0.0181448	0.580997
383	AGPAT3	0.410312	0.310573
384	AGPAT4	0.534866	0.202786
385	AGPAT5	-0.0100104	0.521987
386	AGPS	0.284122	0.434256
387	AGR2	-0.0719296	1.53799
388	AGRN	0.426202	0.609172
389	AGRP	0.116669	0.127395
390	AGT	0.0442244	1.53168
391	AGTPBP1	0.271251	0.382722
392	AGTR1	0.342163	1.29635
393	AGTRAP	0.417615	0.514622
394	AHCTF1	0.217626	0.346178
395	AHCY	0.42537	0.451919
396	AHCYL1	-0.209857	0.382568
397	AHCYL2	0.0188397	0.455129
398	AHDC1	0.48618	0.375428
399	AHI1	-0.117264	0.338287
400	AHNAK	0.508178	0.654064
401	AHNAK2	0.682373	0.510647
402	AHR	0.438404	0.581176
403	AHRR	-0.0730577	0.0848437
404	AHSA1	0.241522	0.362101
405	AIDA	0.27352	0.656717
406	AIF1	0.361956	0.724082
407	AIF1L	0.447882	0.451067
408	AIFM1	0.637956	0.305536
409	AIFM2	0.485532	0.370059
410	AIFM3	0.165065	0.17945
411	AIG1	0.417213	0.232915
412	AIM2	0.413866	0.32023
413	AIMP1	0.0765874	0.254781
414	AIMP2	0.660424	0.357575
415	AIP	-0.112975	0.461952
416	AIRE	0.133178	0.0542192
417	AJAP1	0.486312	0.199101
418	AJM1	0.369442	0.459904
419	AJUBA	0.530219	0.531204
420	AK1	0.179168	0.322587
421	AK2	0.434686	0.26553
422	AK3	0.141394	0.385669
423	AK4	0.319277	0.545131
424	AK5	0.327721	0.932716
425	AK6	0.181574	0.362517
426	AK7	0.156418	0.279196
427	AK8	0.131413	0.295578
428	AK9	0.0784033	0.269514
429	AKAP1	0.039716	0.451695
430	AKAP10	0.218051	0.309881
431	AKAP11	0.213774	0.531446
432	AKAP12	0.6865	0.659324
433	AKAP13	0.190057	0.529896
434	AKAP17A	0.271016	0.46592
435	AKAP3	0.290518	0.293078
436	AKAP5	0.360167	0.281497
437	AKAP6	0.492707	0.220315
438	AKAP7	0.529999	0.565884
439	AKAP8	0.115278	0.271477
440	AKAP8L	0.104882	0.442012
441	AKAP9	-0.126323	0.579616
442	AKIP1	0.115457	0.268181
443	AKIRIN1	0.237489	0.510335
444	AKIRIN2	0.298732	0.342282
445	AKNA	0.406921	0.466096
446	AKR1A1	0.473114	0.411891
447	AKR1B1	0.37442	0.635919
448	AKR1B10	-0.186998	0.215201
449	AKR1B15	-0.0589625	0.0639376
450	AKR1C1	0.26847	0.462872
451	AKR1C2	0.177283	0.351932
452	AKR1C3	0.160971	0.696934
453	AKR1E2	-0.0719129	0.386454
454	AKR7A2	0.227785	0.43556
455	AKR7A3	0.378555	0.453991
456	AKT1	0.0884736	0.411291
457	AKT1S1	0.45506	0.312086
458	AKT2	0.00111516	0.357167
459	AKT3	0.145678	0.517458
460	AKTIP	0.102616	0.295682
461	ALAD	0.598773	0.504911
462	ALAS1	0.272452	0.421315
463	ALAS2	0.0309995	0.095034
464	ALB	0.198262	1.02479
465	ALCAM	0.20951	0.631767
466	ALDH16A1	-0.280191	0.542084
467	ALDH18A1	0.401269	0.404546
468	ALDH1A1	0.147612	1.32274
469	ALDH1A2	0.726329	0.582056
470	ALDH1A3	0.310896	0.789753
471	ALDH1B1	0.422637	0.455585
472	ALDH1L1	0.129094	0.754999
473	ALDH1L2	0.580811	0.274689
474	ALDH2	0.591794	0.733038
475	ALDH3A1	0.273395	0.283083
476	ALDH3A2	0.595237	0.460837
477	ALDH3B1	0.410971	0.376991
478	ALDH4A1	0.483945	0.608819
479	ALDH5A1	0.114259	0.392351
480	ALDH6A1	0.308681	0.593738
481	ALDH7A1	0.228373	0.498284
482	ALDH8A1	-0.00463179	0.161745
483	ALDH9A1	0.224739	0.483602
484	ALDOA	0.18548	0.456268
485	ALDOB	0.053609	0.114098
486	ALDOC	0.302433	0.563455
487	ALG1	0.532246	0.290357
488	ALG10	-0.0637204	0.253069
489	ALG10B	-0.179516	0.353202
490	ALG11	-0.107022	0.282955
491	ALG12	0.0837223	0.385524
492	ALG13	0.349565	0.342337
493	ALG14	0.554954	0.208675
494	ALG1L2	0.145782	0.135886
495	ALG2	0.363665	0.40306
496	ALG3	0.472975	0.343477
497	ALG5	0.34522	0.423487
498	ALG6	0.525011	0.360493
499	ALG8	0.39028	0.329594
500	ALG9	0.109591	0.187612
501	ALK	0.0402073	0.0418258
502	ALKAL2	0.295201	0.252741
503	ALKBH1	0.297552	0.236143
504	ALKBH2	0.38735	0.476302
505	ALKBH3	0.145431	0.393494
506	ALKBH4	0.035631	0.316033
507	ALKBH5	0.131477	0.334634
508	ALKBH6	-0.0934483	0.207184
509	ALKBH7	0.282247	0.605322
510	ALKBH8	0.241551	0.26331
511	ALMS1	-0.0737492	0.393816
512	ALOX12	-0.0130722	0.149932
513	ALOX15	0.353281	1.05316
514	ALOX15B	0.544377	2.28285
515	ALOX5	-0.0085594	0.696453
516	ALOX5AP	0.291621	0.657734
517	ALPK1	0.468857	0.307928
518	ALPK2	0.100649	0.0920157
519	ALPK3	0.124625	0.445797
520	ALPL	0.179346	0.846276
521	ALS2	0.1413	0.284387
522	ALS2CL	0.399361	0.535126
523	ALX4	0.333929	0.352259
524	ALYREF	0.320792	0.402156
525	AMACR	0.41158	1.2409
526	AMBP	0.242704	0.305559
527	AMBRA1	0.0894237	0.317196
528	AMD1	0.198783	0.859185
529	AMDHD1	-0.0587047	0.119457
530	AMDHD2	0.0886942	0.42899
531	AMER1	0.293052	0.300495
532	AMFR	0.18626	0.314371
533	AMH	0.331636	0.656451
534	AMHR2	0.0480821	0.121036
535	AMIGO1	0.0798978	0.418203
536	AMIGO2	0.416095	0.649187
537	AMMECR1	0.334138	0.444945
538	AMMECR1L	0.0833822	0.36108
539	AMN	0.252665	0.199165
540	AMN1	-0.192803	0.279788
541	AMOT	0.479275	0.655031
542	AMOTL1	-0.301098	0.808728
543	AMOTL2	0.486909	0.621688
544	AMPD2	0.0827687	0.350731
545	AMPD3	0.181968	0.792998
546	AMPH	0.423978	0.189887
547	AMT	-0.220962	0.0809372
548	AMY2B	0.403649	0.400622
549	AMZ1	0.293407	0.0661062
550	AMZ2	0.0973164	0.244093
551	ANAPC1	0.181123	0.33391
552	ANAPC10	-0.0173256	0.146984
553	ANAPC11	0.261721	0.460448
554	ANAPC13	0.344442	0.31762
555	ANAPC15	0.184806	0.34651
556	ANAPC16	0.197772	0.312059
557	ANAPC2	-0.0150999	0.443026
558	ANAPC4	0.260689	0.35363
559	ANAPC5	0.411844	0.401214
560	ANAPC7	0.0586353	0.284032
561	ANG	0.55614	0.823567
562	ANGEL1	0.322187	0.350881
563	ANGEL2	-0.15163	0.379241
564	ANGPT1	0.717089	0.523244
565	ANGPT2	0.241789	0.523384
566	ANGPT4	0.31086	0.0873068
567	ANGPTL1	0.623619	0.492529
568	ANGPTL2	0.456492	0.745336
569	ANGPTL3	0.163554	0.668583
570	ANGPTL4	0.482018	1.05917
571	ANGPTL6	0.0202225	0.0963646
572	ANGPTL8	-0.0306402	0.126591
573	ANK1	0.30295	0.429652
574	ANK2	0.625039	0.266635
575	ANK3	0.288507	0.615977
576	ANKAR	-0.0522718	0.207698
577	ANKDD1A	0.488142	0.30318
578	ANKDD1B	0.460896	0.218614
579	ANKEF1	0.309864	0.304759
580	ANKFN1	0.0566609	0.101293
581	ANKFY1	0.19372	0.445525
582	ANKH	0.250598	0.711349
583	ANKHD1	0.198069	0.171713
584	ANKIB1	0.0192686	0.454837
585	ANKK1	0.125767	0.415319
586	ANKLE1	0.172696	0.163793
587	ANKLE2	-0.0404077	0.255658
588	ANKMY1	0.419351	0.263777
589	ANKMY2	0.256522	0.310772
590	ANKRA2	0.0515184	0.486259
591	ANKRD1	0.210428	0.837785
592	ANKRD10	0.0701673	0.62719
593	ANKRD11	-0.0576243	0.405023
594	ANKRD12	0.0659631	0.40896
595	ANKRD13A	0.455459	0.36056
596	ANKRD13B	0.534119	0.45606
597	ANKRD13C	0.16157	0.28339
598	ANKRD13D	-0.00132656	0.469827
599	ANKRD16	0.205828	0.410348
600	ANKRD17	-0.202496	0.514386
601	ANKRD18A	0.183848	0.277834
602	ANKRD18B	0.0928829	0.318559
603	ANKRD2	0.199314	0.387806
604	ANKRD22	-0.050901	0.714896
605	ANKRD23	0.032504	0.257701
606	ANKRD24	0.220801	0.471915
607	ANKRD26	-0.068682	0.231305
608	ANKRD27	0.279172	0.310945
609	ANKRD28	0.20279	0.331889
610	ANKRD29	0.213821	0.812575
611	ANKRD31	0.1023	0.0646865
612	ANKRD33B	0.63481	0.242718
613	ANKRD34A	-0.117703	0.354508
614	ANKRD35	0.625701	0.474915
615	ANKRD36	0.22227	0.168391
616	ANKRD36B	-0.109335	0.211828
617	ANKRD36C	0.242919	0.191099
618	ANKRD37	0.274554	0.81344
619	ANKRD39	-0.0619511	0.226302
620	ANKRD40	0.342287	0.357837
621	ANKRD42	0.237398	0.253171
622	ANKRD44	0.470933	0.296335
623	ANKRD45	-0.0294654	0.0834782
624	ANKRD46	0.0315999	0.365075
625	ANKRD49	0.00402392	0.342181
626	ANKRD50	0.160732	0.625273
627	ANKRD52	0.282621	0.443432
628	ANKRD53	0.258734	0.242025
629	ANKRD54	0.233809	0.307913
630	ANKRD55	0.137765	0.0853539
631	ANKRD6	0.150182	0.381405
632	ANKRD61	-0.151609	0.249992
633	ANKRD65	0.430123	0.634422
634	ANKRD9	0.0628563	0.460095
635	ANKS1A	0.282835	0.357745
636	ANKS1B	0.00358307	0.173525
637	ANKS3	0.373532	0.471608
638	ANKS6	0.310926	0.438704
639	ANKZF1	0.475703	0.568326
640	ANLN	0.538047	0.486561
641	ANO1	0.53048	0.614355
642	ANO10	0.050846	0.269702
643	ANO2	-0.0779965	0.164981
644	ANO3	0.162264	0.198202
645	ANO4	0.715206	0.438319
646	ANO5	0.520122	0.476317
647	ANO6	0.600052	0.565873
648	ANO7	0.481569	1.21491
649	ANO8	0.397528	0.422726
650	ANO9	0.196118	0.608346
651	ANOS1	0.177532	0.627782
652	ANP32A	0.209822	0.301038
653	ANP32B	-0.0118845	0.509043
654	ANP32E	0.672158	0.466022
655	ANPEP	0.523962	2.28813
656	ANTKMT	0.216316	0.580506
657	ANTXR1	0.560119	0.731948
658	ANTXR2	0.52997	0.709591
659	ANXA1	0.434088	0.898535
660	ANXA10	0.119949	0.189841
661	ANXA11	0.168299	0.431873
662	ANXA13	0.127415	0.206122
663	ANXA2	0.601873	0.673274
664	ANXA2R	-0.0953851	0.624277
665	ANXA3	0.240267	0.749121
666	ANXA4	0.518406	0.341036
667	ANXA5	0.0702003	0.49032
668	ANXA6	0.578681	0.617621
669	ANXA7	-0.00450571	0.352609
670	ANXA8	0.275751	0.362401
671	ANXA9	-0.0695411	0.587192
672	AOAH	0.349743	0.534305
673	AOC1	0.433353	1.61077
674	AOC2	-0.0924824	0.354143
675	AOC3	0.687752	0.701531
676	AOPEP	0.547027	0.416698
677	AOX1	0.744232	0.70239
678	AP1AR	0.12753	0.382878
679	AP1B1	0.406404	0.419265
680	AP1G1	0.248687	0.460177
681	AP1G2	0.0705455	0.57253
682	AP1M1	0.177004	0.205516
683	AP1M2	0.586638	0.387901
684	AP1S1	0.413826	0.425617
685	AP1S2	0.222467	0.349703
686	AP1S3	0.407418	0.386922
687	AP2A1	0.280786	0.301524
688	AP2A2	0.034116	0.297182
689	AP2B1	0.151298	0.40756
690	AP2M1	0.161521	0.302047
691	AP2S1	0.293168	0.647543
692	AP3B1	0.240545	0.377023
693	AP3B2	0.0634218	0.246581
694	AP3D1	0.369646	0.381506
695	AP3M1	0.017139	0.473938
696	AP3M2	0.0973016	0.408998
697	AP3S1	-0.243911	0.324975
698	AP3S2	0.110565	0.256202
699	AP4B1	-0.125954	0.355634
700	AP4E1	0.26609	0.281493
701	AP4M1	0.407134	0.34798
702	AP4S1	0.595262	0.134884
703	AP5B1	0.484376	0.333182
704	AP5M1	0.0269265	0.276867
705	AP5S1	0.0717629	0.296397
706	AP5Z1	0.0497866	0.403719
707	APAF1	0.0645888	0.452708
708	APBA1	0.151516	0.321809
709	APBA2	0.660725	0.485465
710	APBA3	0.0419347	0.299177
711	APBB1	0.495905	0.4822
712	APBB1IP	0.384717	0.500686
713	APBB2	0.28733	0.311401
714	APBB3	-0.0914238	0.503685
715	APC	0.178368	0.457046
716	APC2	0.189763	0.156356
717	APCDD1	0.288082	0.767746
718	APCDD1L	0.293772	0.113299
719	APEH	0.406762	0.426997
720	APEX1	0.530346	0.413581
721	APEX2	0.231186	0.318875
722	APH1A	0.131095	0.332621
723	APH1B	0.0945589	0.465489
724	API5	-0.0755522	0.333004
725	APIP	-0.0704318	0.382069
726	APLF	0.623669	0.17995
727	APLN	0.476068	0.717667
728	APLNR	0.0222595	0.643556
729	APLP1	-0.108239	0.553613
730	APLP2	0.404644	0.477765
731	APMAP	0.53562	0.432874
732	APOA1	0.0273128	0.294878
733	APOB	0.117738	0.103696
734	APOBEC2	0.0343257	0.39609
735	APOBEC3A	0.0125639	0.202213
736	APOBEC3B	0.189813	0.297955
737	APOBEC3C	0.629031	0.780365
738	APOBEC3D	0.387836	0.094059
739	APOBEC3F	0.418557	0.47241
740	APOBEC3G	0.514639	0.481921
741	APOBEC3H	0.12579	0.275344
742	APOBR	0.110467	0.500129
743	APOC1	0.110158	1.11246
744	APOD	-0.0925838	1.29484
745	APOE	0.0573371	1.21013
746	APOF	0.257244	1.0282
747	APOL1	0.480539	0.818254
748	APOL2	0.0945946	0.437103
749	APOL3	0.198263	0.662233
750	APOL4	0.00067789	1.33927
751	APOL6	0.464565	0.640815
752	APOLD1	0.203356	0.785283
753	APOM	0.179392	0.323238
754	APOO	0.319894	0.347176
755	APOOL	-0.113045	0.499788
756	APP	-0.128602	0.808379
757	APPBP2	-0.00713891	0.386893
758	APPL1	0.0353058	0.388251
759	APPL2	-0.0814189	0.516887
760	APRT	0.404086	0.637233
761	APTR	0.183201	0.320924
762	APTX	0.48347	0.169184
763	AQP1	0.258687	0.780077
764	AQP11	0.0404618	0.786546
765	AQP3	0.452189	0.938248
766	AQP5	0.463746	0.338739
767	AQP6	-0.125841	0.122119
768	AQP7	0.259616	0.147113
769	AQP8	0.0422672	0.185583
770	AQP9	0.17118	0.278481
771	AQR	-0.153495	0.391021
772	AR	-0.0343856	0.589429
773	ARAF	0.354345	0.398371
774	ARAP1	0.291206	0.427022
775	ARAP2	0.113092	0.384629
776	ARAP3	0.189129	0.494109
777	ARC	0.115216	0.448678
778	ARCN1	0.113647	0.423626
779	AREG	0.132754	0.952425
780	AREL1	0.235426	0.364749
781	ARF1	0.369068	0.472044
782	ARF3	0.34195	0.303084
783	ARF4	0.435981	0.417783
784	ARF5	0.274566	0.457756
785	ARF6	0.23822	0.409722
786	ARFGAP1	0.117803	0.450452
787	ARFGAP2	0.154983	0.316639
788	ARFGAP3	0.332767	0.506597
789	ARFGEF1	0.286897	0.378094
790	ARFGEF2	0.0557903	0.552512
791	ARFGEF3	0.35784	0.794428
792	ARFIP1	-0.0077171	0.394266
793	ARFIP2	0.54008	0.411643
794	ARFRP1	-0.142522	0.450366
795	ARG1	0.0995777	0.258018
796	ARG2	0.540742	1.14225
797	ARGLU1	-0.0378203	0.716852
798	ARHGAP1	0.395162	0.360239
799	ARHGAP10	0.545225	0.403111
800	ARHGAP11A	0.473429	0.314903
801	ARHGAP11B	-0.0429953	0.0882699
802	ARHGAP12	-0.123561	0.532349
803	ARHGAP15	0.480877	0.33828
804	ARHGAP17	0.413992	0.244012
805	ARHGAP18	0.238883	0.581886
806	ARHGAP19	-0.0700232	0.314764
807	ARHGAP20	0.658587	0.347425
808	ARHGAP21	0.05164	0.417555
809	ARHGAP22	0.280902	0.262267
810	ARHGAP23	0.637202	0.549654
811	ARHGAP24	0.459266	0.238172
812	ARHGAP25	0.441267	0.410187
813	ARHGAP26	-0.128	0.476152
814	ARHGAP27	0.381433	0.426372
815	ARHGAP28	0.125086	0.671336
816	ARHGAP29	-0.144041	0.591019
817	ARHGAP30	0.39913	0.556299
818	ARHGAP31	0.429319	0.4274
819	ARHGAP32	0.20973	0.539996
820	ARHGAP33	0.280136	0.546614
821	ARHGAP35	0.195702	0.444692
822	ARHGAP39	0.516671	0.407908
823	ARHGAP4	0.302305	0.570507
824	ARHGAP40	0.268851	0.605122
825	ARHGAP42	0.155029	0.336562
826	ARHGAP44	0.141694	0.31314
827	ARHGAP45	0.331848	0.550102
828	ARHGAP5	0.307075	0.56923
829	ARHGAP6	-0.160327	0.608875
830	ARHGAP8	0.0590532	0.293613
831	ARHGAP9	0.398543	0.458334
832	ARHGDIA	0.427799	0.425347
833	ARHGDIB	0.207008	0.888517
834	ARHGDIG	0.454366	0.746857
835	ARHGEF1	0.125415	0.458367
836	ARHGEF10	-0.0385265	0.124063
837	ARHGEF10L	0.364418	0.367203
838	ARHGEF11	0.212116	0.444113
839	ARHGEF12	0.104024	0.48834
840	ARHGEF15	0.20451	0.434164
841	ARHGEF16	0.428617	0.461405
842	ARHGEF17	0.400416	0.536327
843	ARHGEF18	-0.0660676	0.264284
844	ARHGEF19	0.171116	0.665348
845	ARHGEF2	0.522697	0.41459
846	ARHGEF25	0.633729	0.43964
847	ARHGEF26	0.376396	0.702596
848	ARHGEF28	0.521195	0.352688
849	ARHGEF3	0.124055	0.576898
850	ARHGEF33	0.101829	0.111975
851	ARHGEF35	0.209734	0.516444
852	ARHGEF37	0.339823	0.584215
853	ARHGEF38	0.445485	0.622574
854	ARHGEF39	0.333382	0.212298
855	ARHGEF4	0.0191824	0.402189
856	ARHGEF40	0.521633	0.423094
857	ARHGEF5	0.0125789	0.333693
858	ARHGEF6	0.351814	0.495
859	ARHGEF7	0.148604	0.455654
860	ARHGEF9	0.334156	0.253882
861	ARID1A	0.0104529	0.489535
862	ARID1B	0.0709777	0.331613
863	ARID2	0.00823837	0.369054
864	ARID3A	0.0392346	0.357583
865	ARID3B	0.233219	0.244078
866	ARID3C	-0.255247	0.133456
867	ARID4A	0.104446	0.389847
868	ARID4B	-0.00723858	0.377446
869	ARID5A	0.318761	0.802931
870	ARID5B	-0.0723211	0.573847
871	ARIH1	-0.0547163	0.315992
872	ARIH2	0.0799154	0.359749
873	ARL1	0.150395	0.378822
874	ARL10	0.536828	0.227833
875	ARL11	0.314588	0.174062
876	ARL13A	0.0352202	0.105787
877	ARL13B	-0.122295	0.421922
878	ARL14EP	-0.137788	0.251018
879	ARL15	-0.0629356	0.457665
880	ARL16	-0.122912	0.540045
881	ARL17A	-0.244996	0.164778
882	ARL17B	-0.116537	0.147176
883	ARL2	-0.17719	0.628506
884	ARL2BP	0.188171	0.169015
885	ARL3	-0.272651	0.393093
886	ARL4A	0.368116	0.509981
887	ARL4C	0.646919	0.548443
888	ARL4D	0.581701	0.664318
889	ARL5A	-0.0934326	0.413866
890	ARL5B	-0.135603	0.511428
891	ARL6	0.155815	0.320207
892	ARL6IP1	0.254371	0.470464
893	ARL6IP4	-0.0639599	0.188805
894	ARL6IP5	0.307738	0.466861
895	ARL6IP6	0.110118	0.38436
896	ARL8A	0.0297899	0.280622
897	ARL8B	0.345713	0.320099
898	ARL9	-0.14572	0.334855
899	ARMC1	0.0173088	0.365891
900	ARMC10	0.0552871	0.279699
901	ARMC12	0.113281	0.37645
902	ARMC2	0.108301	0.203903
903	ARMC5	0.0270926	0.461011
904	ARMC6	0.502145	0.343266
905	ARMC7	-0.0333661	0.40692
906	ARMC8	0.202619	0.271787
907	ARMC9	0.00012848	0.222726
908	ARMCX1	0.636559	0.86162
909	ARMCX2	0.35258	0.792113
910	ARMCX3	0.133319	0.396901
911	ARMCX4	0.493568	0.389356
912	ARMCX5	0.311631	0.33844
913	ARMCX6	0.343259	0.334274
914	ARMH1	0.269321	0.378756
915	ARMH3	0.210618	0.273722
916	ARMH4	0.551177	0.205294
917	ARMT1	0.0518369	0.375993
918	ARNT	0.319083	0.320958
919	ARNT2	0.0411287	0.519951
920	ARPC1A	0.132419	0.466558
921	ARPC1B	0.201877	0.131642
922	ARPC2	0.411708	0.327075
923	ARPC3	0.408257	0.345148
924	ARPC4	-0.0969863	0.470345
925	ARPC5	0.304307	0.2883
926	ARPC5L	0.385519	0.339646
927	ARPIN	-0.0759998	0.389894
928	ARPP19	0.261712	0.339555
929	ARR3	0.0250239	0.163288
930	ARRB1	0.516002	0.392766
931	ARRB2	0.155549	0.429081
932	ARRDC1	-0.21124	0.525623
933	ARRDC2	0.241073	0.658603
934	ARRDC3	0.335133	0.73533
935	ARRDC4	-0.0952381	0.525685
936	ARRDC5	0.310565	0.160343
937	ARSA	0.283843	0.529868
938	ARSB	0.1952	0.338574
939	ARSD	0.338102	0.510433
940	ARSG	0.363795	0.381921
941	ARSI	0.513252	0.268526
942	ARSJ	0.614677	0.477987
943	ARSK	0.277653	0.36309
944	ARSL	0.138453	0.231717
945	ART3	0.132128	0.31545
946	ART4	0.121615	0.502731
947	ART5	0.255819	0.324996
948	ARTN	-0.266172	0.385748
949	ARV1	0.247845	0.307277
950	ARVCF	0.524093	0.439303
951	ASAH1	-0.00964954	0.57206
952	ASAH2	-0.104899	0.112313
953	ASAH2B	0.248052	0.263248
954	ASAP1	0.384737	0.471905
955	ASAP2	0.224619	0.54518
956	ASAP3	0.227169	0.498447
957	ASB1	0.401383	0.325393
958	ASB12	0.430067	0.158449
959	ASB13	-0.02487	0.433668
960	ASB14	-0.17115	0.107055
961	ASB16	-0.0989727	0.276633
962	ASB2	0.655144	0.619009
963	ASB3	0.229674	0.363977
964	ASB4	0.160611	0.0839967
965	ASB6	-0.0389303	0.225722
966	ASB7	-0.0952338	0.291819
967	ASB8	0.0836667	0.2775
968	ASB9	-0.0993719	0.692824
969	ASCC1	-0.057686	0.362246
970	ASCC2	0.171254	0.263728
971	ASCC3	0.462377	0.458187
972	ASCL2	0.231821	0.774397
973	ASCL5	-0.0924272	0.121692
974	ASF1A	0.0246821	0.389104
975	ASF1B	0.629852	0.615555
976	ASGR1	0.218034	0.183578
977	ASGR2	0.155158	0.156597
978	ASH1L	0.195582	0.437282
979	ASH2L	0.141259	0.381708
980	ASIC1	0.130442	0.441818
981	ASIC2	0.446267	0.358696
982	ASIC3	0.311944	0.50482
983	ASIC4	0.124007	0.0886743
984	ASIP	-8.85595e-06	0.154728
985	ASL	0.328723	0.388079
986	ASMT	-0.226059	0.0739761
987	ASMTL	0.234953	0.357574
988	ASNS	0.298601	0.13098
989	ASNSD1	0.150667	0.214315
990	ASPA	0.602431	0.273237
991	ASPDH	-0.1122	0.163328
992	ASPG	0.018311	0.137862
993	ASPH	0.296857	0.540608
994	ASPHD1	0.322411	0.585183
995	ASPHD2	0.0775713	0.368469
996	ASPM	0.566021	0.312672
997	ASPN	0.213329	0.949666
998	ASPRV1	0.111022	0.27091
999	ASPSCR1	0.248255	0.428349
1000	ASRGL1	0.19825	0.787857
1001	ASS1	-0.176515	0.996336
1002	ASTE1	0.145115	0.276619
1003	ASTN1	0.17422	0.189203
1004	ASTN2	0.441528	0.71584
1005	ASXL1	0.034698	0.457363
1006	ASXL2	0.00664248	0.43688
1007	ASXL3	0.599529	0.143668
1008	ATAD1	0.282571	0.686212
1009	ATAD2	-0.0729468	0.615792
1010	ATAD2B	0.331194	0.332547
1011	ATAD3A	0.411159	0.434724
1012	ATAD3B	0.319415	0.58555
1013	ATAD3C	0.296653	0.471396
1014	ATAD5	0.395187	0.212195
1015	ATAT1	0.495728	0.467185
1016	ATE1	0.191421	0.417956
1017	ATF1	-0.0790876	0.433108
1018	ATF2	-0.122417	0.412016
1019	ATF3	0.358566	1.59782
1020	ATF4	0.40615	0.420197
1021	ATF5	0.294956	0.610994
1022	ATF6	0.230465	0.420593
1023	ATF6B	-0.0714847	0.425891
1024	ATF7	0.0744278	0.312101
1025	ATF7IP	0.281219	0.441043
1026	ATF7IP2	-0.0526729	0.514099
1027	ATG10	0.0489549	0.240221
1028	ATG101	0.272756	0.42772
1029	ATG12	-0.135102	0.275906
1030	ATG13	0.373405	0.306209
1031	ATG14	-0.0694122	0.373744
1032	ATG16L1	-0.077935	0.325083
1033	ATG16L2	0.1163	0.549876
1034	ATG2A	0.0296119	0.307249
1035	ATG2B	-0.221827	0.449382
1036	ATG3	0.316973	0.240402
1037	ATG4A	0.320962	0.353519
1038	ATG4B	-0.293082	0.393299
1039	ATG4C	-0.0638395	0.320302
1040	ATG4D	0.134435	0.356949
1041	ATG5	0.460263	0.366887
1042	ATG7	-0.05724	0.239474
1043	ATG9A	-0.0198161	0.554305
1044	ATG9B	0.507686	0.313579
1045	ATIC	0.137002	0.398479
1046	ATL1	0.0341402	0.414516
1047	ATL2	0.467826	0.382027
1048	ATL3	0.23927	0.381855
1049	ATM	0.360817	0.390498
1050	ATMIN	0.130833	0.492658
1051	ATN1	-0.109194	0.482187
1052	ATOH7	0.234427	0.143413
1053	ATOH8	0.333034	0.62248
1054	ATOX1	-0.166131	0.483117
1055	ATP10A	0.113738	0.331568
1056	ATP10B	0.0659339	0.0375478
1057	ATP10D	0.411149	0.474075
1058	ATP11A	0.343321	0.947242
1059	ATP11B	-0.0358611	0.703382
1060	ATP11C	0.274899	0.391575
1061	ATP13A1	0.432628	0.318744
1062	ATP13A2	0.371722	0.407322
1063	ATP13A3	-0.0448372	0.506931
1064	ATP13A4	0.142087	0.103311
1065	ATP1A1	0.0604514	0.925798
1066	ATP1A2	0.707518	0.794039
1067	ATP1A3	-0.12176	0.0308292
1068	ATP1A4	0.351309	0.109545
1069	ATP1B1	0.42572	0.807215
1070	ATP1B2	0.398401	0.448722
1071	ATP1B3	-0.171266	0.445235
1072	ATP23	-0.1728	0.236727
1073	ATP2A1	0.282096	0.489093
1074	ATP2A2	0.412656	0.544578
1075	ATP2A3	0.285342	0.839228
1076	ATP2B1	0.111071	0.493682
1077	ATP2B2	-0.0359836	0.0576799
1078	ATP2B4	0.721446	0.670967
1079	ATP2C1	0.380419	0.551685
1080	ATP2C2	0.248655	0.720103
1081	ATP5F1A	0.256042	0.433772
1082	ATP5F1B	0.409657	0.480102
1083	ATP5F1C	0.167716	0.376065
1084	ATP5F1D	0.0303154	0.713445
1085	ATP5F1E	0.147095	0.532406
1086	ATP5IF1	0.379422	0.418051
1087	ATP5MC1	0.345543	0.474015
1088	ATP5MC2	0.330189	0.407589
1089	ATP5MC3	0.248328	0.38998
1090	ATP5ME	0.332018	0.664488
1091	ATP5MF	0.331597	0.495531
1092	ATP5MG	0.219704	0.40399
1093	ATP5MGL	0.00862815	0.126741
1094	ATP5PB	0.270917	0.383525
1095	ATP5PD	0.195128	0.362733
1096	ATP5PF	0.113328	0.374137
1097	ATP5PO	0.203226	0.542643
1098	ATP6AP1	0.552355	0.39501
1099	ATP6AP2	0.0993473	0.331858
1100	ATP6V0A1	0.416649	0.336811
1101	ATP6V0A2	-0.125508	0.266605
1102	ATP6V0B	0.359203	0.45864
1103	ATP6V0C	0.00454266	0.183701
1104	ATP6V0D1	0.300027	0.417673
1105	ATP6V0D2	0.228783	0.259711
1106	ATP6V0E1	0.331251	0.326694
1107	ATP6V0E2	0.389878	0.578309
1108	ATP6V1A	0.0208476	0.482861
1109	ATP6V1B2	0.0959801	0.371046
1110	ATP6V1C1	-0.0290904	0.377151
1111	ATP6V1C2	0.131321	0.560644
1112	ATP6V1D	0.279214	0.33732
1113	ATP6V1E1	0.275496	0.324941
1114	ATP6V1E2	0.443185	0.269629
1115	ATP6V1F	0.261202	0.425914
1116	ATP6V1G1	0.387376	0.48136
1117	ATP6V1G2	0.275409	0.222826
1118	ATP6V1H	0.224624	0.356305
1119	ATP7A	-0.132458	0.462568
1120	ATP7B	0.227129	0.457761
1121	ATP8A1	0.183687	0.679668
1122	ATP8A2	0.423769	0.97466
1123	ATP8B1	0.275276	0.608909
1124	ATP8B2	0.400554	0.699733
1125	ATP8B3	0.155499	0.0862671
1126	ATP8B4	0.469891	0.63658
1127	ATP9A	0.0346717	0.535442
1128	ATP9B	-0.222436	0.307433
1129	ATPAF1	0.460398	0.25791
1130	ATPAF2	0.197422	0.267173
1131	ATPSCKMT	0.235801	0.313148
1132	ATR	0.368946	0.32265
1133	ATRAID	0.315943	0.297246
1134	ATRIP	0.212939	0.338866
1135	ATRN	-0.0942241	0.388311
1136	ATRNL1	0.651564	0.313735
1137	ATRX	-0.123214	0.420849
1138	ATXN1	0.0957028	0.482184
1139	ATXN10	0.0343322	0.356969
1140	ATXN1L	0.217754	0.439748
1141	ATXN2	-0.077815	0.421058
1142	ATXN2L	0.427966	0.472794
1143	ATXN3	0.0525635	0.251235
1144	ATXN7	0.0770845	0.383056
1145	ATXN7L1	0.125281	0.305079
1146	ATXN7L2	0.349544	0.265962
1147	ATXN7L3	0.32135	0.317435
1148	ATXN7L3B	-0.0653628	0.39255
1149	AUH	0.0255614	0.582829
1150	AUNIP	0.481932	0.176553
1151	AUP1	0.267917	0.355496
1152	AURKA	0.574845	0.44147
1153	AURKAIP1	0.347877	0.567136
1154	AURKB	0.501402	0.548439
1155	AURKC	-0.204658	0.239126
1156	AUTS2	0.644571	0.385409
1157	AVEN	0.1559	0.332231
1158	AVIL	0.174526	0.296909
1159	AVL9	0.361222	0.386492
1160	AVPI1	0.474714	0.718518
1161	AVPR1A	0.28501	0.439502
1162	AVPR2	0.357435	0.289661
1163	AXDND1	0.00750038	0.118595
1164	AXIN1	0.293911	0.386401
1165	AXIN2	0.535771	0.522346
1166	AXL	0.510658	0.615867
1167	AZGP1	0.627908	1.45883
1168	AZI2	-0.0814378	0.328301
1169	AZIN1	-0.139512	0.604756
1170	AZIN2	0.0499841	0.264884
1171	AZU1	0.140776	0.216282
1172	B2M	0.468733	0.735685
1173	B3GALNT1	0.241679	0.500424
1174	B3GALNT2	0.258842	0.355152
1175	B3GALT1	0.0458431	0.157451
1176	B3GALT2	0.635409	0.409574
1177	B3GALT4	0.362408	0.478095
1178	B3GALT5	0.190909	0.255968
1179	B3GALT6	0.477438	0.450599
1180	B3GAT1	0.253052	0.881257
1181	B3GAT2	-0.14744	0.0676732
1182	B3GAT3	0.162243	0.484066
1183	B3GLCT	0.0110081	0.335149
1184	B3GNT2	0.28766	0.492878
1185	B3GNT4	-0.096857	0.143507
1186	B3GNT5	0.305625	0.59021
1187	B3GNT7	0.312842	0.393531
1188	B3GNT8	0.524064	0.350511
1189	B3GNT9	0.463626	0.574588
1190	B3GNTL1	0.35737	0.24796
1191	B4GALNT1	0.496171	0.239661
1192	B4GALNT3	0.344998	0.485926
1193	B4GALNT4	0.668975	0.79917
1194	B4GALT1	0.371144	0.522856
1195	B4GALT2	0.0885442	0.36903
1196	B4GALT3	0.569067	0.311987
1197	B4GALT4	0.0165432	0.333066
1198	B4GALT5	0.349256	0.443934
1199	B4GALT6	0.104645	0.379869
1200	B4GALT7	-0.00545379	0.356929
1201	B4GAT1	-0.0272329	0.401097
1202	B9D1	0.354016	0.282529
1203	B9D2	0.116762	0.451556
1204	BAALC	0.165579	0.186131
1205	BAAT	0.16453	0.113616
1206	BABAM1	-0.0672417	0.475864
1207	BABAM2	0.241384	0.298877
1208	BACE1	0.585009	0.280442
1209	BACE2	0.189103	0.884159
1210	BACH1	-0.1498	0.528965
1211	BACH2	0.525456	0.222408
1212	BAD	0.275665	0.454685
1213	BAG1	-0.21496	0.466221
1214	BAG2	0.283762	0.458701
1215	BAG3	0.38451	0.522509
1216	BAG4	0.238476	0.410947
1217	BAG5	-0.0228515	0.299702
1218	BAG6	0.318609	0.291995
1219	BAHCC1	0.0358068	0.38767
1220	BAHD1	0.268793	0.319364
1221	BAIAP2	0.215208	0.480195
1222	BAIAP2L1	0.296259	0.436029
1223	BAIAP2L2	0.285685	0.935457
1224	BAIAP3	0.563907	0.602271
1225	BAK1	0.165604	0.34638
1226	BAMBI	0.0968938	1.05191
1227	BANF1	0.092528	0.4438
1228	BANK1	0.215218	1.18792
1229	BANP	0.155451	0.264771
1230	BAP1	0.527155	0.259075
1231	BARD1	0.352162	0.360088
1232	BARX2	0.154851	0.71795
1233	BASP1	0.114759	0.968337
1234	BATF	0.300905	0.775084
1235	BATF2	0.320232	0.4301
1236	BATF3	0.163733	0.349952
1237	BAX	0.176136	0.50245
1238	BAZ1A	0.285022	0.42845
1239	BAZ1B	-0.162279	0.386408
1240	BAZ2A	0.156996	0.527888
1241	BAZ2B	0.13325	0.348599
1242	BBC3	0.172237	0.466812
1243	BBIP1	-0.119235	0.261524
1244	BBOF1	-0.255716	0.289228
1245	BBOX1	0.0555404	0.396416
1246	BBS1	0.0439735	0.119651
1247	BBS10	-0.0820675	0.460763
1248	BBS12	-0.14083	0.334098
1249	BBS2	0.1324	0.441985
1250	BBS4	0.132916	0.676745
1251	BBS5	0.117678	0.284062
1252	BBS7	0.0230384	0.338039
1253	BBS9	0.284221	0.227062
1254	BBX	0.387022	0.459733
1255	BCAM	0.481211	0.740319
1256	BCAN	0.0374865	0.16215
1257	BCAP29	-0.0262827	0.16905
1258	BCAP31	0.401933	0.360748
1259	BCAR1	0.154058	0.405828
1260	BCAR3	0.507827	0.408215
1261	BCAS1	0.611281	0.83211
1262	BCAS2	0.340926	0.316652
1263	BCAS3	0.146336	0.342411
1264	BCAS4	0.509211	0.346626
1265	BCAT1	0.139781	0.444825
1266	BCAT2	0.414805	0.488666
1267	BCCIP	0.172794	0.331284
1268	BCDIN3D	0.42525	0.242341
1269	BCHE	0.210475	0.685349
1270	BCKDHA	0.0841409	0.114296
1271	BCKDHB	0.0585553	0.470264
1272	BCKDK	0.115186	0.366912
1273	BCL10	-0.0672134	0.35109
1274	BCL11A	0.337466	0.350739
1275	BCL11B	0.401041	0.296634
1276	BCL2	0.624153	0.526836
1277	BCL2A1	0.260842	0.604771
1278	BCL2L1	0.172044	0.314078
1279	BCL2L10	0.548145	0.498562
1280	BCL2L11	0.0219419	0.413638
1281	BCL2L12	0.236233	0.415478
1282	BCL2L13	0.22111	0.296616
1283	BCL2L14	-0.142372	0.447134
1284	BCL2L15	-0.0269595	0.182319
1285	BCL2L2	0.206966	0.447856
1286	BCL3	0.0841613	0.826247
1287	BCL6	0.302699	0.618086
1288	BCL6B	0.255563	0.49448
1289	BCL7A	0.258201	0.411351
1290	BCL7B	0.421912	0.263491
1291	BCL7C	-0.173225	0.445658
1292	BCL9	0.242942	0.495002
1293	BCL9L	0.310996	0.634782
1294	BCLAF1	-0.0634733	0.391219
1295	BCLAF3	-0.239622	0.362677
1296	BCO1	0.389179	0.287242
1297	BCO2	0.268812	0.166838
1298	BCOR	0.0631056	0.634379
1299	BCORL1	0.120811	0.39982
1300	BCR	0.106219	0.324189
1301	BCS1L	0.46392	0.414724
1302	BDH1	0.59358	0.437598
1303	BDH2	0.432914	0.49629
1304	BDKRB1	0.0952592	0.104979
1305	BDKRB2	0.394931	0.431536
1306	BDNF	0.529877	0.178646
1307	BDP1	-0.0322477	0.515436
1308	BEAN1	0.264426	0.16134
1309	BECN1	-0.112722	0.515135
1310	BEGAIN	0.461713	0.197586
1311	BEND3	0.580422	0.481239
1312	BEND4	0.279887	0.927985
1313	BEND5	0.405221	0.385112
1314	BEND6	0.506197	0.187759
1315	BEND7	0.240496	0.366275
1316	BEST1	0.25582	0.197509
1317	BEST4	-0.0813872	0.133798
1318	BET1	0.0306651	0.284607
1319	BET1L	0.022665	0.303776
1320	BEX1	0.509942	0.935841
1321	BEX2	0.142161	0.71202
1322	BEX3	0.336799	0.468953
1323	BEX4	0.348573	0.502636
1324	BEX5	0.231973	1.0098
1325	BFAR	0.279606	0.261777
1326	BFSP1	-0.229084	0.212851
1327	BFSP2	0.144058	0.0580583
1328	BGLAP	-0.0581258	0.393136
1329	BGN	0.195629	0.929897
1330	BHLHA15	0.368677	0.974965
1331	BHLHE22	0.340343	0.152374
1332	BHLHE40	0.438908	1.04987
1333	BHLHE41	0.261912	0.826147
1334	BHMT	0.259841	0.0705531
1335	BHMT2	0.648534	0.452496
1336	BICC1	0.19593	0.583133
1337	BICD1	0.51615	0.692155
1338	BICD2	0.511813	0.338965
1339	BICDL1	0.475883	0.476697
1340	BICDL2	-0.033601	0.626992
1341	BICRA	0.201635	0.35752
1342	BICRAL	-0.105126	0.420321
1343	BID	0.075803	0.321083
1344	BIK	0.61303	0.542986
1345	BIN1	0.315477	0.530164
1346	BIN2	0.344073	0.477814
1347	BIN3	0.468186	0.338533
1348	BIRC2	0.170669	0.409719
1349	BIRC3	0.313854	0.796497
1350	BIRC5	0.62844	0.619283
1351	BIRC6	-0.0989747	0.433951
1352	BIRC7	0.165404	0.194026
1353	BISPR	0.463798	0.32698
1354	BIVM	0.256422	0.360986
1355	BLACAT1	0.305002	0.0757766
1356	BLCAP	0.160317	0.308948
1357	BLK	0.345045	0.339519
1358	BLM	0.509281	0.207105
1359	BLMH	-0.0832195	0.380801
1360	BLNK	-0.0638934	0.431153
1361	BLOC1S1	0.00506843	0.636252
1362	BLOC1S2	0.190926	0.370383
1363	BLOC1S3	0.133223	0.283369
1364	BLOC1S4	0.391414	0.302256
1365	BLOC1S5	0.0324187	0.240104
1366	BLOC1S6	0.0809185	0.477859
1367	BLVRA	0.0869805	0.460042
1368	BLVRB	0.346054	0.577569
1369	BLZF1	0.0525394	0.370168
1370	BMERB1	0.561559	0.531098
1371	BMF	0.00826028	0.587079
1372	BMI1	-0.111143	0.394727
1373	BMP1	0.475711	0.39285
1374	BMP2	0.409995	0.499026
1375	BMP2K	0.253857	0.238107
1376	BMP4	0.419842	0.651569
1377	BMP5	0.189696	0.855641
1378	BMP6	0.378015	0.833181
1379	BMP7	0.199322	0.841698
1380	BMP8A	0.0849413	0.373048
1381	BMP8B	0.0255477	0.43359
1382	BMPER	0.420075	0.489381
1383	BMPR1A	0.347195	0.381595
1384	BMPR1B	0.294348	0.733874
1385	BMPR2	0.182788	0.462531
1386	BMS1	-0.183405	0.330445
1387	BMS1P4	0.0116311	0.156375
1388	BMX	-0.0484364	0.507302
1389	BNC1	0.418257	0.129647
1390	BNC2	0.62248	0.286197
1391	BNIP1	0.208097	0.344721
1392	BNIP2	0.469064	0.347621
1393	BNIP3	0.268681	0.443633
1394	BNIP3L	0.458293	0.470106
1395	BNIPL	0.566787	0.614429
1396	BOC	0.523649	0.589647
1397	BOD1	0.299256	0.323829
1398	BOD1L1	0.0417367	0.458998
1399	BOK	-0.01762	0.61077
1400	BOLA1	0.0831656	0.420685
1401	BOLA2B	-0.117465	0.228399
1402	BOLA3	0.36496	0.306748
1403	BOP1	0.426944	0.600808
1404	BORA	-0.0206065	0.225555
1405	BORCS5	0.0141236	0.240947
1406	BORCS6	-0.0303798	0.479515
1407	BORCS7	0.0778032	0.448738
1408	BORCS8	-0.225647	0.362552
1409	BPGM	-0.153885	0.370292
1410	BPHL	0.429683	0.359851
1411	BPI	0.402712	0.110307
1412	BPNT1	0.177729	0.356995
1413	BPNT2	0.0458947	0.4278
1414	BPTF	-0.0306698	0.494081
1415	BRAF	0.0690345	0.34716
1416	BRAP	-0.0940907	0.204212
1417	BRAT1	-0.0197242	0.45046
1418	BRCA1	0.510482	0.281616
1419	BRCA2	0.282843	0.158919
1420	BRCC3	0.321881	0.355903
1421	BRD1	-0.0602287	0.399571
1422	BRD2	0.375744	0.413469
1423	BRD3	0.0883047	0.523213
1424	BRD3OS	0.0774833	0.31602
1425	BRD4	0.22718	0.300126
1426	BRD7	-0.108206	0.341196
1427	BRD8	0.189013	0.363296
1428	BRD9	0.326811	0.295699
1429	BRF1	0.184075	0.2579
1430	BRF2	0.0565275	0.36767
1431	BRI3	0.179899	0.468121
1432	BRI3BP	0.332927	0.402893
1433	BRICD5	0.14848	0.498295
1434	BRINP1	-0.027414	0.633756
1435	BRINP2	0.0341534	0.0593175
1436	BRIP1	0.486676	0.186684
1437	BRIX1	0.434769	0.279565
1438	BRK1	0.462479	0.317282
1439	BRMS1	-0.0891121	0.527139
1440	BRMS1L	-0.0730641	0.272124
1441	BROX	-0.169988	0.411242
1442	BRPF1	0.1203	0.328829
1443	BRPF3	0.0839099	0.541456
1444	BRSK1	-0.0456691	0.613834
1445	BRSK2	0.549551	0.735853
1446	BRWD1	0.102572	0.357603
1447	BRWD3	0.27049	0.312382
1448	BSCL2	-0.107169	0.186197
1449	BSDC1	0.225649	0.335708
1450	BSG	0.243617	0.503312
1451	BSN	0.158838	0.161985
1452	BSPRY	0.460024	0.402442
1453	BST1	0.486923	0.280178
1454	BST2	0.453418	1.02589
1455	BTAF1	0.0607561	0.597562
1456	BTBD1	0.298489	0.330869
1457	BTBD10	-0.0625899	0.280355
1458	BTBD16	-0.069918	0.215598
1459	BTBD18	-0.0759937	0.032552
1460	BTBD19	0.333803	0.316789
1461	BTBD2	0.200493	0.33977
1462	BTBD3	0.375585	0.409165
1463	BTBD6	0.313717	0.350097
1464	BTBD7	0.0890929	0.368197
1465	BTBD8	0.0248193	0.292586
1466	BTBD9	0.0722363	0.331134
1467	BTC	-0.1077	0.40126
1468	BTD	0.493305	0.372507
1469	BTF3	0.282055	0.526501
1470	BTF3L4	0.393602	0.269254
1471	BTG1	0.313988	0.52831
1472	BTG2	0.172679	1.19546
1473	BTG3	0.442496	0.560081
1474	BTK	0.40575	0.365328
1475	BTLA	0.329011	0.255097
1476	BTN2A1	0.386652	0.389007
1477	BTN2A2	0.417616	0.372064
1478	BTN3A1	0.386412	0.539092
1479	BTN3A2	0.38255	0.635064
1480	BTN3A3	0.354595	0.518445
1481	BTNL8	-0.140892	0.04276
1482	BTNL9	0.277007	0.382875
1483	BTRC	-0.0369203	0.397279
1484	BUB1	0.570509	0.440681
1485	BUB1B	0.568646	0.401338
1486	BUB3	0.128407	0.336536
1487	BUD13	0.335166	0.309479
1488	BUD23	0.317105	0.33052
1489	BUD31	0.214801	0.313141
1490	BYSL	0.414712	0.357281
1491	BZW1	0.116643	0.445559
1492	BZW2	0.57157	0.499126
1493	C10orf143	-0.147992	0.210561
1494	C10orf55	0.252985	0.0596828
1495	C10orf67	0.19386	0.0329477
1496	C10orf88	-0.0441895	0.255244
1497	C11orf16	-0.0526382	0.166217
1498	C11orf21	0.273751	0.194707
1499	C11orf24	0.184373	0.315923
1500	C11orf42		0.315923
1501	C11orf54	0.331328	0.37159
1502	C11orf58	-0.0413815	0.305725
1503	C11orf65	-0.0957826	0.0937479
1504	C11orf68	-0.217807	0.393429
1505	C11orf71	0.196313	0.534382
1506	C11orf91	0.400579	0.0863213
1507	C11orf96	0.290205	1.1099
1508	C12orf42	0.258198	0.0455482
1509	C12orf43	-0.109661	0.196366
1510	C12orf56	-0.146325	0.494916
1511	C12orf57	0.171457	0.731645
1512	C12orf60	0.353748	0.444648
1513	C12orf71		0.444648
1514	C12orf75	0.584466	0.640092
1515	C12orf76	0.113358	0.310704
1516	C13orf46	0.217921	0.550037
1517	C14orf119	0.380542	0.260139
1518	C14orf132	0.451731	0.517661
1519	C14orf28	0.300069	0.235737
1520	C14orf93	0.105236	0.276533
1521	C15orf39	0.410569	0.442083
1522	C15orf40	0.0227345	0.179547
1523	C15orf48	0.117016	1.62622
1524	C15orf61	0.377312	0.25802
1525	C15orf62	0.329255	0.264783
1526	C16orf54	0.458285	0.569759
1527	C16orf74	0.488276	0.395672
1528	C16orf86	0.271032	0.388738
1529	C16orf87	0.241455	0.27415
1530	C16orf89	0.456207	0.62004
1531	C16orf95	0.344483	0.117307
1532	C16orf96	-0.0760559	0.12064
1533	C17orf100	0.184416	0.337247
1534	C17orf107	0.00612114	0.31961
1535	C17orf113	0.106597	0.329651
1536	C17orf58	0.234776	0.525457
1537	C17orf67	0.263515	0.277214
1538	C17orf75	0.0174935	0.294025
1539	C17orf78	-0.121091	0.103275
1540	C17orf99	0.229219	0.0726584
1541	C18orf21	-0.0719884	0.361971
1542	C18orf32	0.0402125	0.190198
1543	C18orf54	0.291339	0.172856
1544	C19orf12	0.395977	0.211494
1545	C19orf18	0.0457916	0.627719
1546	C19orf25	-0.249951	0.393293
1547	C19orf38	0.186041	0.343325
1548	C19orf44	0.055111	0.228199
1549	C19orf47	0.402487	0.225842
1550	C19orf53	0.0250116	0.530587
1551	C19orf67	-0.0149925	0.0992654
1552	C19orf73	0.165916	0.514208
1553	C19orf81	0.237247	0.93196
1554	C19orf84	0.0509377	0.0527631
1555	C1D	0.257059	0.373597
1556	C1GALT1	0.187638	0.32748
1557	C1GALT1C1	0.424026	0.365555
1558	C1GALT1C1L	0.158392	0.352143
1559	C1QA	0.219549	0.886138
1560	C1QB	0.231753	0.855093
1561	C1QBP	0.408304	0.458706
1562	C1QC	0.311662	0.816583
1563	C1QL1	0.224522	0.391033
1564	C1QL3	-0.250876	0.420076
1565	C1QL4	0.265522	0.0679003
1566	C1QTNF1	0.518052	0.686403
1567	C1QTNF12	0.073778	0.259882
1568	C1QTNF2	0.158406	0.422
1569	C1QTNF3	0.365311	0.942612
1570	C1QTNF4	0.189839	0.306226
1571	C1QTNF6	0.0842455	0.410103
1572	C1QTNF7	0.410125	0.5649
1573	C1R	0.380708	0.885872
1574	C1RL	0.21226	0.672708
1575	C1S	0.47349	0.858028
1576	C1orf115	0.327355	0.758904
1577	C1orf116	0.218084	0.595894
1578	C1orf122	0.364679	0.538533
1579	C1orf127	0.364225	0.107737
1580	C1orf131	0.323929	0.284439
1581	C1orf146	-0.155744	0.0741051
1582	C1orf159	0.232061	0.398025
1583	C1orf162	0.307311	0.40235
1584	C1orf174	0.265779	0.254308
1585	C1orf198	0.381305	0.332712
1586	C1orf21	0.180592	0.502366
1587	C1orf210	0.353034	0.435627
1588	C1orf216	0.343249	0.317714
1589	C1orf220	0.147252	0.168793
1590	C1orf226	-0.040242	0.511555
1591	C1orf35	0.199117	0.386492
1592	C1orf43	0.384236	0.394839
1593	C1orf50	-0.0282445	0.225673
1594	C1orf52	0.269569	0.26933
1595	C1orf53	0.427072	0.503449
1596	C1orf54	0.568233	0.540704
1597	C1orf56	0.387286	0.336739
1598	C1orf74	0.204436	0.360111
1599	C2	0.0305793	0.663502
1600	C20orf144	0.133052	0.239877
1601	C20orf202	-0.0545377	0.0717863
1602	C20orf204	0.447749	0.190612
1603	C20orf96	0.230001	0.611306
1604	C21orf58	0.553665	0.351723
1605	C21orf91	0.462884	0.296979
1606	C22orf15	0.100939	0.150698
1607	C22orf23	-0.177908	0.41303
1608	C22orf31	0.309659	0.155736
1609	C22orf39	0.150412	0.279305
1610	C2CD2	0.256819	0.33841
1611	C2CD2L	0.0927819	0.352936
1612	C2CD3	0.102045	0.315705
1613	C2CD4A	0.134397	0.674479
1614	C2CD4B	-0.0167027	0.7541
1615	C2CD4C	0.049353	0.521835
1616	C2CD4D	0.326698	0.43132
1617	C2CD5	-0.0601877	0.416045
1618	C2CD6	0.233566	0.0970699
1619	C2orf15	0.411488	0.316141
1620	C2orf42	-0.0923297	0.193
1621	C2orf49	0.0203305	0.376776
1622	C2orf66	0.245675	0.126492
1623	C2orf68	0.0599752	0.279251
1624	C2orf69	0.183059	0.399899
1625	C2orf72	0.205353	1.21107
1626	C2orf74	0.0516558	0.177182
1627	C2orf76	0.088159	0.348937
1628	C2orf81	0.081729	0.183497
1629	C2orf88	0.618259	0.381647
1630	C2orf92	0.443283	0.327102
1631	C3	0.272996	1.24718
1632	C3AR1	0.265786	0.521406
1633	C3orf18	0.432784	0.407654
1634	C3orf20	0.148954	0.0643877
1635	C3orf33	0.0457114	0.247205
1636	C3orf38	-0.108507	0.334636
1637	C3orf49	0.133421	0.0535838
1638	C3orf52	0.235245	0.388317
1639	C3orf62	0.174009	0.332806
1640	C3orf70	0.709612	0.440367
1641	C3orf80	0.0913787	0.348403
1642	C4A	0.225447	0.961694
1643	C4B	0.199073	0.999894
1644	C4BPA	-0.0223514	0.213991
1645	C4BPB	0.0760475	0.0540436
1646	C4orf19	0.192027	0.527394
1647	C4orf3	0.363715	0.358903
1648	C4orf33	0.375612	0.262469
1649	C4orf46	0.144281	0.310587
1650	C4orf50	0.426955	0.0967334
1651	C5	-0.242067	0.554846
1652	C5AR1	0.199235	0.632742
1653	C5AR2	0.13261	0.0965427
1654	C5orf15	0.0930289	0.4501
1655	C5orf22	0.0472013	0.36449
1656	C5orf24	-0.166038	0.533495
1657	C5orf34	0.531737	0.19808
1658	C5orf58	-0.0431014	0.0679009
1659	C5orf63	0.195961	0.285207
1660	C6	0.130933	0.380261
1661	C6orf120	0.0796747	0.458157
1662	C6orf132	0.126768	0.442109
1663	C6orf136	0.257194	0.337264
1664	C6orf141	-0.0729766	0.333004
1665	C6orf163	-0.10703	0.243842
1666	C6orf226	0.0989155	0.603321
1667	C6orf47	0.185445	0.251086
1668	C6orf52	0.288297	0.505778
1669	C6orf58	0.143622	0.0908688
1670	C6orf62	0.445422	0.410222
1671	C6orf89	0.323911	0.297365
1672	C7	0.534077	1.00389
1673	C7orf25	-0.103357	0.0979676
1674	C7orf50	-0.153995	0.484375
1675	C7orf57	0.154544	0.245433
1676	C8G	0.201161	0.32878
1677	C8orf33	0.330519	0.384447
1678	C8orf48	0.115966	0.109172
1679	C8orf58	0.0221546	0.38572
1680	C8orf76	0.0492661	0.313532
1681	C8orf82	-0.0427594	0.641219
1682	C8orf88	0.780433	0.378993
1683	C9orf152	0.23692	0.628629
1684	C9orf153	-0.153016	0.0936336
1685	C9orf163	0.652512	0.237085
1686	C9orf40	0.327109	0.319296
1687	C9orf43	0.483741	0.187524
1688	C9orf50	0.0516708	0.0915307
1689	C9orf72	0.0254272	0.462882
1690	C9orf78	0.0972679	0.276782
1691	C9orf85	0.263978	0.286676
1692	CA11	0.541895	0.613654
1693	CA12	0.201511	0.580742
1694	CA13	0.166247	0.561318
1695	CA14	0.576446	0.441387
1696	CA2	0.230295	0.67228
1697	CA3	-0.133337	1.25237
1698	CA4	0.232703	0.410653
1699	CA5B	-0.174437	0.458209
1700	CA8	0.148885	0.519766
1701	CA9	-0.0564412	0.19463
1702	CAAP1	0.122694	0.3719
1703	CAB39	0.0314403	0.434421
1704	CAB39L	0.0368984	0.614701
1705	CABCOCO1	0.176209	0.753435
1706	CABIN1	-0.110976	0.364503
1707	CABLES1	0.465654	0.325358
1708	CABLES2	0.320356	0.322409
1709	CABP1	0.425253	0.162904
1710	CABP4	0.614559	0.394028
1711	CABP7	-0.180842	0.0931415
1712	CABYR	0.277189	0.175288
1713	CACFD1	0.478319	0.460468
1714	CACHD1	0.57619	0.485586
1715	CACNA1A	0.244816	0.0760185
1716	CACNA1C	0.449172	0.387619
1717	CACNA1D	0.62429	1.0322
1718	CACNA1E	0.223467	0.0265065
1719	CACNA1F	0.327682	0.0581477
1720	CACNA1G	0.357145	0.472175
1721	CACNA1H	0.316003	0.88474
1722	CACNA1I	0.356943	0.191033
1723	CACNA1S	-0.225709	0.202509
1724	CACNA2D1	0.612644	0.719745
1725	CACNA2D2	0.222955	0.435334
1726	CACNA2D3	0.514413	0.296313
1727	CACNA2D4	0.240325	0.130039
1728	CACNB1	0.578396	0.329875
1729	CACNB2	0.243139	0.287691
1730	CACNB3	0.30571	0.430535
1731	CACNB4	0.325674	0.218501
1732	CACNG4	0.694999	1.0358
1733	CACNG8	0.0268778	0.0443525
1734	CACTIN	-0.0979445	0.267233
1735	CACUL1	-0.0817621	0.297016
1736	CACYBP	0.110353	0.341303
1737	CAD	0.555113	0.431697
1738	CADM1	-0.0318646	0.691588
1739	CADM2	0.195144	0.599896
1740	CADM3	0.285316	0.377724
1741	CADM4	0.476641	0.423943
1742	CADPS	0.558229	0.79338
1743	CADPS2	-0.00773882	0.510509
1744	CAGE1	0.377723	0.0407489
1745	CAHM	0.178159	0.396428
1746	CALB1	0.154987	0.0500422
1747	CALB2	0.0614286	0.194762
1748	CALCB	0.322545	0.0983794
1749	CALCOCO1	0.237273	0.397247
1750	CALCOCO2	0.197901	0.264368
1751	CALCR	0.110105	0.0507727
1752	CALCRL	0.269175	0.65449
1753	CALD1	0.65179	0.675449
1754	CALHM2	0.570634	0.450861
1755	CALHM5	0.449523	0.228059
1756	CALHM6	0.205521	0.317504
1757	CALM1	0.668256	0.399464
1758	CALM2	-0.0401669	0.39696
1759	CALM3	-0.0427473	0.382586
1760	CALML4	-0.135939	0.0509703
1761	CALML6	-0.0332592	0.277579
1762	CALN1	0.183936	0.284624
1763	CALR	0.489138	0.643718
1764	CALU	-0.00330786	0.47394
1765	CALY	0.0555406	0.149974
1766	CAMK1	0.375435	0.429742
1767	CAMK1D	0.426212	0.533731
1768	CAMK1G	0.386327	0.363094
1769	CAMK2A	0.573489	0.205296
1770	CAMK2B	0.501173	0.668019
1771	CAMK2D	0.085692	0.530864
1772	CAMK2G	0.618469	0.361382
1773	CAMK2N1	0.204605	1.04282
1774	CAMK2N2	0.191382	0.58876
1775	CAMK4	0.279689	0.421942
1776	CAMKK1	-0.283447	0.448857
1777	CAMKK2	0.363191	0.824068
1778	CAMKMT	-0.0236564	0.236688
1779	CAMLG	0.0469407	0.293072
1780	CAMP	0.0555873	0.295015
1781	CAMSAP1	-0.014037	0.410775
1782	CAMSAP2	0.280707	0.366996
1783	CAMSAP3	0.540463	0.523045
1784	CAMTA1	0.0340585	0.222973
1785	CAMTA2	0.256114	0.371456
1786	CAND1	0.00253386	0.401458
1787	CAND2	0.637002	0.342529
1788	CANT1	0.472092	0.523052
1789	CANX	0.293187	0.50872
1790	CAP1	0.442574	0.269329
1791	CAP2	0.515049	0.631066
1792	CAPG	0.52062	0.825759
1793	CAPN1	0.267175	0.38709
1794	CAPN10	0.0722399	0.36311
1795	CAPN11	0.0634571	0.12315
1796	CAPN12	0.236448	0.207213
1797	CAPN13	0.26719	0.521211
1798	CAPN14	-0.0379861	0.126784
1799	CAPN15	0.606315	0.382028
1800	CAPN2	0.391143	0.56207
1801	CAPN3	0.0657246	0.183978
1802	CAPN5	-0.109081	0.869242
1803	CAPN6	0.510225	0.738757
1804	CAPN7	0.00755798	0.370484
1805	CAPN8	0.323213	0.441594
1806	CAPN9	0.0378157	0.556417
1807	CAPNS1	0.179156	0.409302
1808	CAPRIN1	0.119425	0.437042
1809	CAPRIN2	-0.0122237	0.359007
1810	CAPS	0.109711	0.832363
1811	CAPS2	0.203176	0.260936
1812	CAPZA1	0.215821	0.380532
1813	CAPZA2	0.283007	0.364061
1814	CAPZB	0.334772	0.28861
1815	CARD10	-0.0968404	0.466222
1816	CARD11	0.440482	0.447068
1817	CARD14	0.0963952	0.275589
1818	CARD16	0.412522	0.466552
1819	CARD19	0.157608	0.340653
1820	CARD6	0.277028	0.340624
1821	CARD8	0.277186	0.257409
1822	CARD9	0.34023	0.279945
1823	CARF	0.250665	0.286556
1824	CARHSP1	0.0657306	0.388811
1825	CARM1	0.136928	0.414047
1826	CARMIL1	0.229541	0.449746
1827	CARMIL2	0.284211	0.347156
1828	CARMIL3	0.183549	0.128611
1829	CARNMT1	0.280652	0.367923
1830	CARNS1	-0.0436061	0.220264
1831	CARS1	0.0216884	0.310074
1832	CARS2	-0.0157395	0.4417
1833	CASC11	0.407977	0.216842
1834	CASC18	0.257841	0.0913995
1835	CASC2	-0.0172737	0.132235
1836	CASC3	-0.0256759	0.327368
1837	CASC8	0.430688	0.315715
1838	CASC9	-0.0470076	0.236294
1839	CASD1	0.00514142	0.477118
1840	CASK	-0.0854059	0.275786
1841	CASKIN1	0.591844	0.355631
1842	CASKIN2	0.500895	0.31734
1843	CASP1	0.440056	0.542694
1844	CASP10	0.34964	0.421808
1845	CASP2	0.0466139	0.544683
1846	CASP3	0.353382	0.325794
1847	CASP4	0.35071	0.472884
1848	CASP5	0.189583	0.0667654
1849	CASP6	0.0678893	0.369642
1850	CASP7	0.291817	0.566476
1851	CASP8	0.157452	0.436234
1852	CASP8AP2	0.319492	0.424337
1853	CASP9	0.058009	0.295635
1854	CASQ1	0.634227	0.696195
1855	CASQ2	0.550477	0.698717
1856	CASR	-0.0132915	0.0311258
1857	CASS4	0.296838	0.214695
1858	CAST	0.282773	0.419749
1859	CASTOR1	0.0425969	0.146798
1860	CASTOR2	0.224678	0.370463
1861	CASZ1	-0.0181006	0.488956
1862	CAT	0.256527	0.547853
1863	CATIP	0.271719	0.291355
1864	CATSPER1	-0.00593028	0.108487
1865	CATSPER2	0.0609812	0.310628
1866	CATSPER3	0.218467	0.200338
1867	CATSPERB	0.248171	0.298011
1868	CATSPERE	0.26402	0.134351
1869	CATSPERG	-0.0109212	0.19364
1870	CAV1	0.725716	0.689612
1871	CAV2	0.723151	0.476031
1872	CAVIN1	0.655159	0.666235
1873	CAVIN2	0.603665	0.721989
1874	CAVIN3	0.416126	0.6332
1875	CAVIN4	-0.102398	0.424933
1876	CBARP	-0.0764344	0.248685
1877	CBFA2T2	-0.0798449	0.599356
1878	CBFA2T3	-0.163222	0.53078
1879	CBFB	0.18062	0.443387
1880	CBL	0.573318	0.347336
1881	CBLB	0.0864635	0.335778
1882	CBLC	0.3431	0.912548
1883	CBLL1	0.141721	0.56534
1884	CBLN1	0.0198833	0.254109
1885	CBLN3	0.252637	0.409097
1886	CBLN4	-0.0580583	0.108057
1887	CBR1	0.429914	0.525801
1888	CBR3	0.0594559	0.823122
1889	CBR4	0.472229	0.505059
1890	CBS	0.261584	0.477788
1891	CBX1	0.00580376	0.384892
1892	CBX2	0.472817	0.526037
1893	CBX3	0.583479	0.427139
1894	CBX4	0.152401	0.520148
1895	CBX5	0.0951437	0.411423
1896	CBX6	0.0426362	0.519391
1897	CBX7	0.647283	0.42309
1898	CBX8	0.613484	0.379578
1899	CBY1	0.290489	0.367982
1900	CBY3	0.074574	0.138579
1901	CC2D1A	-0.289274	0.390738
1902	CC2D1B	0.108089	0.276714
1903	CC2D2A	0.145296	0.344787
1904	CC2D2B	0.335978	0.0797144
1905	CCAR1	0.217182	0.370343
1906	CCAR2	0.226955	0.391043
1907	CCBE1	0.520631	0.317349
1908	CCDC102A	0.209036	0.453728
1909	CCDC102B	0.147488	0.238274
1910	CCDC106	0.177683	0.466388
1911	CCDC107	0.106865	0.492884
1912	CCDC110	0.388761	0.415938
1913	CCDC112	0.0970595	0.408027
1914	CCDC115	0.292502	0.315731
1915	CCDC116	0.123043	0.103062
1916	CCDC117	-0.22899	0.414068
1917	CCDC12	-0.0341974	0.384872
1918	CCDC120	0.105147	0.365296
1919	CCDC121	-0.194247	0.341376
1920	CCDC122	0.0139985	0.303589
1921	CCDC124	0.0482525	0.513718
1922	CCDC125	0.32818	0.476159
1923	CCDC126	0.0363232	0.327525
1924	CCDC127	-0.0897038	0.213416
1925	CCDC13	-0.0469926	0.0678819
1926	CCDC134	-0.0706042	0.379363
1927	CCDC136	0.412218	0.470843
1928	CCDC137	-0.0363733	0.389705
1929	CCDC138	0.60883	0.320673
1930	CCDC14	0.408528	0.498115
1931	CCDC141	0.0512009	0.396432
1932	CCDC142	0.342213	0.324432
1933	CCDC144A	-0.123259	0.258423
1934	CCDC146	0.233093	0.417202
1935	CCDC148	-0.0757238	0.142317
1936	CCDC149	0.327438	0.311491
1937	CCDC15	0.0553631	0.338982
1938	CCDC150	0.413494	0.074229
1939	CCDC152	0.20694	0.19055
1940	CCDC154	-0.156007	0.763508
1941	CCDC157	0.278027	0.210196
1942	CCDC158	0.201962	0.148413
1943	CCDC159	0.403587	0.523115
1944	CCDC163	0.309675	0.468036
1945	CCDC167	0.249199	0.554752
1946	CCDC168	0.105482	0.0288692
1947	CCDC17	0.177787	0.449822
1948	CCDC170	-0.00909129	0.364522
1949	CCDC171	0.192565	0.120351
1950	CCDC174	0.106586	0.216874
1951	CCDC18	0.369647	0.150548
1952	CCDC180	0.253839	0.133291
1953	CCDC181	0.453584	0.155971
1954	CCDC183	-0.114249	0.377318
1955	CCDC184	0.00485643	0.347365
1956	CCDC186	-0.147829	0.678332
1957	CCDC187	0.131052	0.277981
1958	CCDC188	-0.00956431	0.279061
1959	CCDC191	-0.0693251	0.334597
1960	CCDC192	0.0149799	0.109497
1961	CCDC194	0.260827	0.257999
1962	CCDC196	0.0556798	0.0285464
1963	CCDC200	0.151403	0.171509
1964	CCDC22	0.413831	0.401268
1965	CCDC24	0.315585	0.484843
1966	CCDC25	0.234353	0.345257
1967	CCDC26	-0.318749	0.0809152
1968	CCDC28A	0.42509	0.435419
1969	CCDC28B	0.0411413	0.396479
1970	CCDC3	0.277843	0.778891
1971	CCDC30	-0.116205	0.135277
1972	CCDC32	-0.134698	0.238993
1973	CCDC34	0.396296	0.348215
1974	CCDC38	0.0348134	0.0381426
1975	CCDC39	-0.230077	0.0356547
1976	CCDC40	0.507601	0.42546
1977	CCDC43	0.289371	0.277885
1978	CCDC47	0.209247	0.430465
1979	CCDC50	-0.10728	0.49812
1980	CCDC51	0.27222	0.337366
1981	CCDC57	0.0363447	0.499368
1982	CCDC59	0.0677797	0.25694
1983	CCDC6	0.379555	0.502141
1984	CCDC61	-9.54351e-05	0.44513
1985	CCDC62	0.162571	0.0766108
1986	CCDC65	-0.109868	0.312807
1987	CCDC66	0.1116	0.305361
1988	CCDC68	0.473082	0.432563
1989	CCDC69	0.667373	0.556202
1990	CCDC7	-0.0164638	0.183511
1991	CCDC71	-0.0369223	0.33824
1992	CCDC71L	0.253987	0.417783
1993	CCDC73	0.144741	0.0453903
1994	CCDC74A	0.386574	0.812312
1995	CCDC74B	0.487946	0.639906
1996	CCDC77	0.142397	0.32563
1997	CCDC78	0.482552	0.688732
1998	CCDC8	0.596273	0.579767
[truncated: 14,060 more rows]

## Sheet: ProGENIE(CHIEF)
	gene	pcc	rmse
0	A1BG	0.0221982	0.0438405
1	A2M	0.159258	1.04093
2	A2ML1	-0.241316	0.382654
3	A4GALT	0.464842	0.562468
4	AAAS	0.116449	0.233857
5	AACS	0.220755	0.353857
6	AADAT	0.100886	0.776092
7	AAGAB	0.0651117	0.30585
8	AAK1	-0.154766	0.470728
9	AAMDC	0.0604219	0.348964
10	AAMP	0.0772544	0.269446
11	AANAT	-0.0680281	0.0430606
12	AAR2	0.105243	0.255374
13	AARD	0.175508	0.27694
14	AARS1	0.00650676	0.4024
15	AARS2	-0.0252724	0.228776
16	AARSD1	0.0586686	0.199296
17	AASDH	-0.088184	0.42823
18	AASDHPPT	-0.113857	0.409905
19	AASS	-0.151194	0.478635
20	AATBC	-0.134632	0.37279
21	AATF	-0.120918	0.276894
22	AATK	-0.0455293	0.433861
23	ABAT	0.151737	0.802463
24	ABCA1	0.167622	0.751846
25	ABCA10	0.470586	0.145823
26	ABCA12	-0.0922584	0.191051
27	ABCA13	0.0756004	0.0406989
28	ABCA2	0.317318	0.503495
29	ABCA3	0.343328	0.478915
30	ABCA4	-0.000677864	0.0985963
31	ABCA5	-0.030108	0.394813
32	ABCA6	0.311179	0.205202
33	ABCA7	0.0298065	0.420082
34	ABCA8	0.392378	0.583759
35	ABCA9	0.332957	0.201552
36	ABCB1	0.323653	0.63117
37	ABCB10	-0.100089	0.52426
38	ABCB11	0.19812	0.073309
39	ABCB4	0.243287	0.106552
40	ABCB5	0.217363	0.222814
41	ABCB6	0.255364	0.122431
42	ABCB7	-0.126542	0.341585
43	ABCB8	-0.130618	0.379277
44	ABCB9	0.254396	0.155197
45	ABCC1	-0.134703	0.508409
46	ABCC10	0.18648	0.343584
47	ABCC11	0.0771971	0.998884
48	ABCC2	0.291245	0.0870496
49	ABCC3	0.329211	0.687193
50	ABCC4	0.103495	1.09619
51	ABCC5	0.340473	0.513013
52	ABCC6	0.0833578	0.47349
53	ABCC8	-0.0882402	0.451274
54	ABCC9	0.330464	0.574142
55	ABCD1	0.169097	0.357791
56	ABCD2	0.215689	0.118863
57	ABCD3	-0.00122805	0.445127
58	ABCD4	0.0591138	0.262408
59	ABCE1	0.183799	0.502004
60	ABCF1	0.0970186	0.305714
61	ABCF2	-0.0219977	0.292644
62	ABCF3	-0.12918	0.268298
63	ABCG1	0.172683	0.564556
64	ABCG2	0.30633	0.560542
65	ABCG4	0.315042	0.0442612
66	ABCG5		0.0442612
67	ABCG8	-0.0355378	0.010083
68	ABHD1	0.217234	0.397368
69	ABHD10	-0.0147139	0.400866
70	ABHD11	-0.0835512	0.619565
71	ABHD12	-0.257677	0.694779
72	ABHD12B	-0.0436872	0.0314246
73	ABHD13	-0.0436619	0.412091
74	ABHD14A	0.0134242	0.618077
75	ABHD14B	0.146266	0.44464
76	ABHD15	0.10136	0.371113
77	ABHD16A	-0.0325186	0.156827
78	ABHD17A	0.0939914	0.386706
79	ABHD17B	0.0758197	0.573211
80	ABHD17C	0.177316	0.564113
81	ABHD18	-0.243966	0.355459
82	ABHD2	0.161243	0.997704
83	ABHD3	0.0807052	0.486172
84	ABHD4	0.0364677	0.431957
85	ABHD5	0.14881	0.308443
86	ABHD6	0.281762	0.336532
87	ABHD8	-0.00991868	0.432317
88	ABI1	0.04598	0.434557
89	ABI2	0.0013996	0.352751
90	ABI3	0.259246	0.553154
91	ABI3BP	0.341873	0.598924
92	ABITRAM	0.0640596	0.368044
93	ABL1	0.0109145	0.474487
94	ABL2	0.132184	0.316253
95	ABLIM1	0.30555	0.751386
96	ABLIM2	-0.124713	0.32154
97	ABLIM3	-0.0372283	0.536101
98	ABO	0.355199	0.729978
99	ABR	0.00894881	0.396852
100	ABRACL	-0.108104	0.693392
101	ABRAXAS1	-0.00253032	0.292146
102	ABRAXAS2	0.103036	0.374832
103	ABT1	-0.343689	0.305118
104	ABTB1	0.078426	0.478
105	ABTB2	0.132021	0.588817
106	ACAA1	0.161445	0.41138
107	ACAA2	0.374782	0.557908
108	ACACA	0.289144	0.698646
109	ACACB	0.476315	0.484243
110	ACAD10	0.023744	0.310855
111	ACAD11	-0.0771372	0.0870244
112	ACAD8	0.182524	0.852547
113	ACAD9	-0.134362	0.264855
114	ACADL	0.319268	0.961483
115	ACADM	-0.0968131	0.613831
116	ACADS	0.309338	0.529026
117	ACADSB	-0.144712	0.703119
118	ACADVL	-0.0651608	0.484206
119	ACAN	0.0241537	0.382933
120	ACAP1	0.036877	0.467996
121	ACAP2	-0.0779991	0.557978
122	ACAP3	0.0235204	0.511773
123	ACAT1	0.103723	0.501246
124	ACAT2	0.365909	0.607798
125	ACBD3	0.017786	0.583826
126	ACBD4	0.213784	0.430501
127	ACBD5	0.165578	0.476326
128	ACBD6	-0.252427	0.300516
129	ACBD7	0.298129	0.324121
130	ACCS	0.00762166	0.562984
131	ACD	-0.00586003	0.377057
132	ACE	0.122596	0.544133
133	ACE2	-0.16328	0.0880879
134	ACER2	0.052587	0.816785
135	ACER3	-0.100505	0.82447
136	ACHE	0.149641	0.729652
137	ACIN1	-0.0813289	0.31703
138	ACKR1	0.255266	1.05783
139	ACKR2	0.124998	0.309452
140	ACKR3	0.0216181	0.789008
141	ACKR4	0.0477508	0.0765325
142	ACLY	0.258709	0.670705
143	ACMSD	0.0131223	0.0415523
144	ACO1	0.342512	0.418507
145	ACO2	0.129459	0.46639
146	ACOT1	0.115561	0.503695
147	ACOT11	0.381731	0.339608
148	ACOT13	0.199319	0.306182
149	ACOT2	0.233222	0.447107
150	ACOT4	-0.00487178	0.346713
151	ACOT7	-0.208822	0.346811
152	ACOT8	0.176466	0.308948
153	ACOT9	0.143862	0.28642
154	ACOX1	0.193924	0.392152
155	ACOX2	0.405714	0.621001
156	ACOX3	0.331983	0.431964
157	ACOXL	0.14113	0.403356
158	ACP1	0.145421	0.304405
159	ACP2	0.393503	0.411347
160	ACP3	0.318531	1.38859
161	ACP4	-0.0149945	0.296096
162	ACP5	0.309312	1.10601
163	ACP6	-0.170191	0.353374
164	ACP7	0.291518	0.113238
165	ACR	0.281304	0.0977182
166	ACRBP	0.307845	0.307273
167	ACRV1	0.424104	0.283287
168	ACSBG1	0.136985	0.23343
169	ACSBG2	-0.022076	0.0535898
170	ACSF2	0.452267	0.720576
171	ACSF3	-0.0624623	0.283292
172	ACSL1	0.054104	0.715645
173	ACSL3	0.0418497	0.836387
174	ACSL4	0.261857	0.69664
175	ACSL5	0.123049	1.20997
176	ACSL6	0.11678	0.0670077
177	ACSM1	-0.198365	1.81334
178	ACSM3	-0.127073	0.927347
179	ACSM4	-0.00432749	0.0361073
180	ACSM5	0.216137	0.115719
181	ACSS1	-0.0831944	0.480632
182	ACSS2	0.458565	0.295657
183	ACSS3	0.548546	0.3546
184	ACTA1	0.33579	1.51364
185	ACTA2	0.571639	1.05045
186	ACTB	0.274711	0.454608
187	ACTC1	0.487187	1.3026
188	ACTG1	-0.0956361	0.464764
189	ACTG2	0.630025	1.29049
190	ACTL6A	0.100747	0.508235
191	ACTN1	0.43907	0.676226
192	ACTN2	0.161935	0.894677
193	ACTN3	0.0442966	0.0632941
194	ACTN4	0.154298	0.495687
195	ACTR10	0.063677	0.271138
196	ACTR1A	0.0516992	0.305462
197	ACTR1B	-0.251333	0.264019
198	ACTR2	0.11353	0.578958
199	ACTR3	0.145038	0.440957
200	ACTR3B	0.155933	0.255804
201	ACTR3C	0.251015	0.167634
202	ACTR5	0.156105	0.249667
203	ACTR6	0.00518772	0.36941
204	ACTR8	0.0627146	0.430924
205	ACTRT3	0.253648	0.244632
206	ACVR1	0.106139	0.528681
207	ACVR1B	0.141927	0.516625
208	ACVR1C	0.153342	0.0973525
209	ACVR2A	0.100783	0.414699
210	ACVR2B	0.053218	0.348291
211	ACVRL1	0.327424	0.524687
212	ACY1	0.205275	0.121229
213	ACY3	-0.0928041	0.779639
214	ACYP1	0.00847669	0.408839
215	ACYP2	-0.0801699	0.291004
216	ADA	0.00577055	0.366402
217	ADA2	0.3132	0.71482
218	ADAD2	0.152417	0.104858
219	ADAM10	-0.0196872	0.656664
220	ADAM11	0.216511	0.263853
221	ADAM12	0.278805	0.243483
222	ADAM15	-0.0449895	0.384499
223	ADAM17	0.0519746	0.363656
224	ADAM19	0.441872	0.531162
225	ADAM20	0.306884	0.0531294
226	ADAM21	0.00414442	0.368744
227	ADAM22	0.271305	0.627952
228	ADAM23	0.302291	0.262083
229	ADAM28	0.0791866	0.521418
230	ADAM32	0.27461	0.230937
231	ADAM33	0.614459	0.636154
232	ADAM8	0.0365699	0.479734
233	ADAM9	0.0233451	0.902819
234	ADAMDEC1	0.218337	0.702213
235	ADAMTS1	0.353631	1.12283
236	ADAMTS10	0.351968	0.439341
237	ADAMTS12	0.060958	0.259135
238	ADAMTS13	0.17419	0.393164
239	ADAMTS14	0.0690796	0.156345
240	ADAMTS15	0.383299	0.300415
241	ADAMTS16	0.162603	0.154422
242	ADAMTS17	0.0745211	0.167385
243	ADAMTS18	0.0325864	0.0921617
244	ADAMTS2	0.295264	0.656882
245	ADAMTS3	0.122576	0.409153
246	ADAMTS4	0.476329	0.857358
247	ADAMTS5	0.280679	0.438678
248	ADAMTS6	0.240167	0.22958
249	ADAMTS7	0.344298	0.194377
250	ADAMTS8	0.519693	0.483708
251	ADAMTS9	0.304185	0.535367
252	ADAMTSL1	0.0192441	1.05434
253	ADAMTSL2	0.241749	0.566551
254	ADAMTSL3	0.117855	0.706763
255	ADAMTSL4	0.414226	0.400416
256	ADAMTSL5	0.0978733	0.314946
257	ADAP1	-0.176029	0.3598
258	ADAP2	0.19973	0.386764
259	ADAR	0.0963447	0.564615
260	ADARB1	0.170879	0.375253
261	ADARB2	0.0455699	0.60119
262	ADAT1	0.0459623	0.481211
263	ADAT2	-0.126978	0.347509
264	ADAT3	-0.00729693	0.382957
265	ADCK1	-0.133198	0.292006
266	ADCK2	0.208711	0.32508
267	ADCK5	0.054131	0.541764
268	ADCY1	0.0645889	0.749753
269	ADCY10	0.0999132	0.132097
270	ADCY2	0.125087	0.523635
271	ADCY3	0.229163	0.650691
272	ADCY4	0.234986	0.419327
273	ADCY5	0.526914	0.678758
274	ADCY6	0.239198	0.592718
275	ADCY7	0.0960645	0.375923
276	ADCY9	-0.171451	0.458605
277	ADCYAP1	0.278227	0.27021
278	ADCYAP1R1	0.432057	0.245119
279	ADD1	0.308845	0.252025
280	ADD2	0.0848139	0.454641
281	ADD3	-0.138842	0.920757
282	ADGRA2	0.496036	0.962009
283	ADGRA3	-0.0796359	0.40847
284	ADGRB1	0.206787	0.390532
285	ADGRB2	0.228057	0.34866
286	ADGRB3	0.340524	0.165144
287	ADGRD1	0.26379	0.376489
288	ADGRE1	0.262344	0.133137
289	ADGRE2	0.171219	0.297877
290	ADGRE3	0.28504	0.147405
291	ADGRE5	0.150323	0.654899
292	ADGRF1	-0.00306311	1.21302
293	ADGRF3	-0.081009	0.0787367
294	ADGRF5	-0.111333	1.48308
295	ADGRG1	-0.136412	0.543608
296	ADGRG2	0.170943	0.476745
297	ADGRG3	0.167931	0.129468
298	ADGRG5	0.0697489	0.273388
299	ADGRG6	0.0818655	0.730315
300	ADGRL1	0.0960654	0.594708
301	ADGRL2	0.176655	0.692799
302	ADGRL3	0.33874	0.200192
303	ADGRL4	0.216805	0.581556
304	ADGRV1	0.00175277	0.340682
305	ADH1B	0.403778	0.425761
306	ADH1C	0.203524	0.802559
307	ADH5	0.52623	0.461967
308	ADH6	-0.271419	0.230723
309	ADHFE1	0.159382	0.578265
310	ADI1	0.181134	0.379274
311	ADIPOR1	-0.147135	0.400177
312	ADIPOR2	0.0174757	0.354575
313	ADK	0.0260177	0.391367
314	ADM	0.227475	0.926608
315	ADM2	0.0298756	0.693109
316	ADM5	-0.249386	0.33434
317	ADNP	-0.118807	0.5498
318	ADNP2	0.045857	0.484283
319	ADO	0.16726	0.358033
320	ADORA1	0.237857	0.164016
321	ADORA2A	0.151607	0.0739643
322	ADORA2B	0.282244	0.398786
323	ADORA3	0.159609	0.366035
324	ADPGK	0.0388244	0.51982
325	ADPRH	0.214078	0.529096
326	ADPRHL1	-0.0269103	0.488672
327	ADPRM	0.0160053	0.62889
328	ADPRS	0.00880858	0.30055
329	ADRA1A	0.409816	0.434604
330	ADRA1B	0.264936	0.10138
331	ADRA1D	0.533865	0.542064
332	ADRA2A	0.181297	0.968699
333	ADRA2B	0.339127	0.214794
334	ADRA2C	0.437007	0.801348
335	ADRB1	0.19932	0.728254
336	ADRB2	0.156038	0.699877
337	ADRM1	-0.0625178	0.326669
338	ADSL	0.488219	0.160754
339	ADSS1	-0.141286	0.348202
340	ADSS2	0.192981	0.554257
341	ADTRP	0.106526	0.364972
342	AEBP1	0.215229	0.964409
343	AEBP2	-0.129666	0.483336
344	AEN	-0.0105462	0.456863
345	AFAP1	0.158577	0.300429
346	AFAP1L1	0.223533	0.374888
347	AFAP1L2	0.331183	0.672821
348	AFDN	0.0340257	0.672187
349	AFF1	-0.111734	0.624864
350	AFF2	-0.0682956	0.160961
351	AFF3	0.277416	1.03577
352	AFF4	-0.0113445	0.663093
353	AFG1L	0.173161	0.202653
354	AFG3L2	0.0366984	0.530897
355	AFMID	0.075957	0.507023
356	AFTPH	0.025667	0.459364
357	AGA	0.00442883	0.459355
358	AGAP1	0.162191	0.480378
359	AGAP2	0.34841	0.250757
360	AGAP3	-0.124146	0.363154
361	AGAP4	0.302494	0.276268
362	AGAP5	0.133782	0.0795345
363	AGAP6	0.248677	0.129419
364	AGAP9	-0.0203101	0.443044
365	AGBL2	0.0482313	0.198459
366	AGBL3	0.0590544	0.197702
367	AGBL4	0.441277	0.11147
368	AGBL5	-0.0374515	0.291946
369	AGER	0.0672423	0.580495
370	AGFG1	0.0599777	0.414513
371	AGFG2	0.0401862	0.509314
372	AGGF1	0.112384	0.296043
373	AGK	0.416423	0.291111
374	AGL	0.0850915	0.548823
375	AGMAT	-0.0512223	0.576025
376	AGMO	0.135102	0.248303
377	AGO1	-0.0490089	0.330855
378	AGO2	-0.109193	0.5568
379	AGO3	-0.135612	0.311217
380	AGO4	-0.165414	0.49249
381	AGPAT1	0.217534	0.345634
382	AGPAT2	-0.0181726	0.579999
383	AGPAT3	0.200939	0.348412
384	AGPAT4	0.481492	0.231844
385	AGPAT5	0.124997	0.593162
386	AGPS	0.10286	0.533965
387	AGR2	-0.14923	1.53099
388	AGRN	0.197962	0.630474
389	AGRP	-0.136588	0.119609
390	AGT	-0.164784	1.55657
391	AGTPBP1	0.222472	0.450409
392	AGTR1	-0.200767	1.36292
393	AGTRAP	0.103822	0.548932
394	AHCTF1	-0.141981	0.464301
395	AHCY	0.000795812	0.391454
396	AHCYL1	-0.378535	0.472052
397	AHCYL2	-0.0219998	0.541868
398	AHDC1	0.363183	0.417755
399	AHI1	-0.155904	0.343836
400	AHNAK	0.243554	0.831088
401	AHNAK2	0.409164	0.662882
402	AHR	0.387376	0.676501
403	AHRR	0.326901	0.0806978
404	AHSA1	-0.214557	0.34226
405	AIDA	0.376672	0.715494
406	AIF1	0.166005	0.777018
407	AIF1L	0.366135	0.483659
408	AIFM1	0.347276	0.291454
409	AIFM2	0.246995	0.408377
410	AIFM3	0.131885	0.179702
411	AIG1	0.0764653	0.261412
412	AIM2	0.172535	0.353933
413	AIMP1	0.149032	0.248262
414	AIMP2	0.41299	0.414118
415	AIP	0.0729666	0.443736
416	AIRE	0.203997	0.0543684
417	AJAP1	0.412886	0.206541
418	AJM1	0.0225218	0.518475
419	AJUBA	0.216201	0.649694
420	AK1	-0.164358	0.340174
421	AK2	-0.0292938	0.25859
422	AK3	0.164723	0.421073
423	AK4	0.135389	0.615524
424	AK5	0.221784	0.941634
425	AK6	-0.0342845	0.378501
426	AK7	0.014538	0.300955
427	AK8	0.0390985	0.292495
428	AK9	-0.0253387	0.265551
429	AKAP1	0.123849	0.462099
430	AKAP10	-0.0369167	0.370516
431	AKAP11	-0.227497	0.715212
432	AKAP12	0.106169	0.875865
433	AKAP13	0.00644255	0.662587
434	AKAP17A	-0.0967357	0.415794
435	AKAP3	0.104859	0.298127
436	AKAP5	0.270917	0.311792
437	AKAP6	0.0900089	0.222116
438	AKAP7	0.281673	0.585615
439	AKAP8	-0.0377652	0.282148
440	AKAP8L	-0.127739	0.37319
441	AKAP9	0.0803543	0.693959
442	AKIP1	0.242034	0.254873
443	AKIRIN1	0.0260947	0.593377
444	AKIRIN2	-0.0541736	0.381051
445	AKNA	0.266323	0.510571
446	AKR1A1	-0.0596187	0.35328
447	AKR1B1	0.367495	0.650835
448	AKR1B10	-0.0448842	0.211379
449	AKR1B15	-0.0437985	0.068946
450	AKR1C1	0.176435	0.475859
451	AKR1C2	0.177764	0.354801
452	AKR1C3	-0.148851	0.71589
453	AKR1E2	0.0866606	0.374971
454	AKR7A2	-0.0549295	0.361689
455	AKR7A3	0.241818	0.436209
456	AKT1	0.189604	0.409825
457	AKT1S1	-0.167507	0.338342
458	AKT2	-0.0577444	0.247515
459	AKT3	0.0707329	0.577769
460	AKTIP	-0.0270752	0.313599
461	ALAD	0.223851	0.57323
462	ALAS1	0.184417	0.387368
463	ALAS2	0.0438988	0.0851728
464	ALB	0.418355	1.01925
465	ALCAM	0.395703	0.630536
466	ALDH16A1	-0.292493	0.490925
467	ALDH18A1	0.0228158	0.48987
468	ALDH1A1	0.0207552	1.41922
469	ALDH1A2	0.596695	0.717991
470	ALDH1A3	0.0465694	0.827535
471	ALDH1B1	0.380045	0.52631
472	ALDH1L1	0.0238893	0.725275
473	ALDH1L2	0.238901	0.333135
474	ALDH2	0.374614	0.808324
475	ALDH3A1	0.186687	0.280415
476	ALDH3A2	0.273835	0.518492
477	ALDH3B1	0.311876	0.402538
478	ALDH4A1	0.296999	0.632285
479	ALDH5A1	-0.00808009	0.463692
480	ALDH6A1	0.136401	0.651684
481	ALDH7A1	0.0393906	0.513959
482	ALDH8A1	0.0434106	0.16808
483	ALDH9A1	0.0276753	0.562516
484	ALDOA	0.0606808	0.444675
485	ALDOB	-0.136851	0.102851
486	ALDOC	0.0799555	0.575394
487	ALG1	0.0849914	0.314426
488	ALG10	-0.235923	0.334109
489	ALG10B	-0.29316	0.402001
490	ALG11	-0.115659	0.31871
491	ALG12	0.0425958	0.35332
492	ALG13	-0.00125783	0.294359
493	ALG14	-0.0547189	0.23561
494	ALG1L2	-0.0599119	0.142537
495	ALG2	0.111605	0.419391
496	ALG3	0.0257802	0.371597
497	ALG5	0.183346	0.410423
498	ALG6	0.104033	0.361197
499	ALG8	0.153749	0.34107
500	ALG9	0.0794193	0.196326
501	ALK	0.0597717	0.0401503
502	ALKAL2	0.24487	0.262463
503	ALKBH1	0.139861	0.222174
504	ALKBH2	0.0954069	0.457665
505	ALKBH3	0.0100794	0.310104
506	ALKBH4	0.139625	0.310585
507	ALKBH5	0.160377	0.291085
508	ALKBH6	-0.0524241	0.189077
509	ALKBH7	-0.0211193	0.652524
510	ALKBH8	-0.0072354	0.307534
511	ALMS1	-0.296727	0.441522
512	ALOX12	-0.0887459	0.123265
513	ALOX15	0.13965	1.12691
514	ALOX15B	0.319177	2.45193
515	ALOX5	0.12098	0.71612
516	ALOX5AP	0.206419	0.725786
517	ALPK1	0.288153	0.368849
518	ALPK2	0.0611183	0.0987462
519	ALPK3	0.10557	0.434369
520	ALPL	0.120502	0.848184
521	ALS2	0.0209211	0.374267
522	ALS2CL	0.175566	0.524497
523	ALX4	0.531199	0.349522
524	ALYREF	0.00797691	0.367058
525	AMACR	0.0234022	1.30324
526	AMBP	0.432522	0.307386
527	AMBRA1	0.0381574	0.351286
528	AMD1	0.0796405	0.899933
529	AMDHD1	0.237718	0.110033
530	AMDHD2	-0.160719	0.410373
531	AMER1	-0.096381	0.34811
532	AMFR	0.166246	0.32476
533	AMH	0.322324	0.672216
534	AMHR2	0.197824	0.114966
535	AMIGO1	0.0362211	0.408931
536	AMIGO2	0.0775096	0.730483
537	AMMECR1	0.131006	0.551147
538	AMMECR1L	-0.0401963	0.421045
539	AMN	-0.0467331	0.206722
540	AMN1	-0.3592	0.303476
541	AMOT	0.266168	0.772908
542	AMOTL1	-0.331422	0.881961
543	AMOTL2	0.33938	0.719531
544	AMPD2	0.0676462	0.309727
545	AMPD3	-0.00995339	0.83543
546	AMPH	0.459653	0.196244
547	AMT	-0.27449	0.0754093
548	AMY2B	0.112051	0.408299
549	AMZ1	-0.290089	0.0555328
550	AMZ2	0.0247232	0.262202
551	ANAPC1	0.138447	0.417653
552	ANAPC10	0.0101772	0.140341
553	ANAPC11	-0.0516031	0.505689
554	ANAPC13	0.0598051	0.348612
555	ANAPC15	0.122826	0.313971
556	ANAPC16	0.174093	0.298455
557	ANAPC2	0.10919	0.348021
558	ANAPC4	0.0442942	0.308875
559	ANAPC5	0.28785	0.302006
560	ANAPC7	-0.0878028	0.258717
561	ANG	0.434473	0.879835
562	ANGEL1	0.0493169	0.39834
563	ANGEL2	0.233869	0.42406
564	ANGPT1	0.462362	0.713129
565	ANGPT2	0.238267	0.53028
566	ANGPT4	0.238884	0.0960335
567	ANGPTL1	0.569017	0.546748
568	ANGPTL2	0.280102	0.834817
569	ANGPTL3	0.352314	0.671069
570	ANGPTL4	0.305949	1.11542
571	ANGPTL6	0.162349	0.0920843
572	ANGPTL8	0.254898	0.118912
573	ANK1	0.13765	0.440598
574	ANK2	0.407562	0.334063
575	ANK3	0.273482	0.680735
576	ANKAR	-0.234448	0.197898
577	ANKDD1A	0.463911	0.327721
578	ANKDD1B	0.387115	0.227745
579	ANKEF1	0.15361	0.355308
580	ANKFN1	0.0545179	0.096377
581	ANKFY1	0.298443	0.543503
582	ANKH	-0.0795829	0.731983
583	ANKHD1	0.353405	0.0923796
584	ANKIB1	0.237917	0.579676
585	ANKK1	-0.0191185	0.386367
586	ANKLE1	0.141393	0.152628
587	ANKLE2	0.18322	0.235807
588	ANKMY1	0.0169243	0.237811
589	ANKMY2	0.0210495	0.342741
590	ANKRA2	0.128609	0.507642
591	ANKRD1	0.0333799	0.849021
592	ANKRD10	-0.243621	0.546276
593	ANKRD11	-0.0961483	0.419564
594	ANKRD12	-0.00465112	0.494298
595	ANKRD13A	0.00285517	0.449806
596	ANKRD13B	0.226638	0.497462
597	ANKRD13C	-0.0282583	0.387007
598	ANKRD13D	-0.122765	0.451182
599	ANKRD16	0.425497	0.339979
600	ANKRD17	-0.0409051	0.637296
601	ANKRD18A	0.207794	0.255625
602	ANKRD18B	-0.0462281	0.335163
603	ANKRD2	0.0564995	0.378344
604	ANKRD22	-0.121669	0.713552
605	ANKRD23	-0.0191589	0.2472
606	ANKRD24	0.100184	0.49474
607	ANKRD26	-0.0428321	0.260681
608	ANKRD27	0.204242	0.356714
609	ANKRD28	0.0779215	0.415404
610	ANKRD29	0.0211161	0.848629
611	ANKRD31	0.0859689	0.066991
612	ANKRD33B	0.262773	0.329379
613	ANKRD34A	-0.0523207	0.347642
614	ANKRD35	0.544264	0.534111
615	ANKRD36	0.0578618	0.186287
616	ANKRD36B	-0.0410184	0.210286
617	ANKRD36C	-0.0220129	0.182896
618	ANKRD37	0.0288236	0.819521
619	ANKRD39	-0.105033	0.224884
620	ANKRD40	-0.0886732	0.538528
621	ANKRD42	0.050621	0.273736
622	ANKRD44	0.0835681	0.392731
623	ANKRD45	0.0241502	0.0738975
624	ANKRD46	-0.0999242	0.385716
625	ANKRD49	0.0141833	0.332273
626	ANKRD50	0.172477	0.735837
627	ANKRD52	0.0915745	0.512513
628	ANKRD53	0.0624413	0.22964
629	ANKRD54	-0.0311406	0.353818
630	ANKRD55	0.409144	0.0811849
631	ANKRD6	0.0948935	0.394101
632	ANKRD61	0.00728116	0.242829
633	ANKRD65	0.501655	0.634649
634	ANKRD9	0.17218	0.423298
635	ANKS1A	-0.154109	0.42349
636	ANKS1B	-0.127367	0.174904
637	ANKS3	0.00948331	0.490255
638	ANKS6	0.263925	0.452094
639	ANKZF1	0.18268	0.440624
640	ANLN	0.576822	0.517908
641	ANO1	0.269013	0.760285
642	ANO10	-0.051988	0.270819
643	ANO2	0.134416	0.161146
644	ANO3	0.23431	0.178538
645	ANO4	0.509481	0.518066
646	ANO5	0.40665	0.522524
647	ANO6	0.328836	0.753096
648	ANO7	0.391835	1.20156
649	ANO8	0.155432	0.421366
650	ANO9	0.0958498	0.586328
651	ANOS1	0.0880732	0.696496
652	ANP32A	-0.0902078	0.320104
653	ANP32B	-0.0625778	0.372905
654	ANP32E	0.297132	0.680396
655	ANPEP	0.253913	2.45036
656	ANTKMT	0.0185374	0.668279
657	ANTXR1	0.272321	0.946092
658	ANTXR2	0.2285	0.814086
659	ANXA1	0.46559	0.938342
660	ANXA10	0.0963783	0.209991
661	ANXA11	0.295231	0.38765
662	ANXA13	0.0798026	0.205638
663	ANXA2	0.233465	0.805434
664	ANXA2R	-0.0894144	0.605834
665	ANXA3	0.187127	0.753587
666	ANXA4	0.289198	0.376374
667	ANXA5	-0.153039	0.54842
668	ANXA6	0.51267	0.703515
669	ANXA7	0.0805227	0.370425
670	ANXA8	0.106369	0.38031
671	ANXA9	-0.0642373	0.577708
672	AOAH	0.272221	0.605352
673	AOC1	0.247275	1.70432
674	AOC2	0.0971001	0.33096
675	AOC3	0.526073	0.884979
676	AOPEP	0.382543	0.457208
677	AOX1	0.489059	0.938815
678	AP1AR	0.166655	0.418625
679	AP1B1	0.030491	0.45364
680	AP1G1	0.0284201	0.565916
681	AP1G2	0.181805	0.454194
682	AP1M1	0.349444	0.198211
683	AP1M2	0.139805	0.399134
684	AP1S1	0.212907	0.41461
685	AP1S2	0.162608	0.376954
686	AP1S3	-0.0861422	0.415917
687	AP2A1	0.0824374	0.323794
688	AP2A2	0.0188011	0.238006
689	AP2B1	0.0530763	0.436053
690	AP2M1	0.218559	0.255453
691	AP2S1	-0.0539912	0.677043
692	AP3B1	0.457463	0.453813
693	AP3B2	0.18804	0.243268
694	AP3D1	-0.135802	0.361257
695	AP3M1	0.0507232	0.55179
696	AP3M2	0.159197	0.432892
697	AP3S1	-0.195247	0.331461
698	AP3S2	0.182464	0.24333
699	AP4B1	-0.0517568	0.246834
700	AP4E1	0.121997	0.351948
701	AP4M1	-0.0180718	0.33196
702	AP4S1	0.445916	0.159078
703	AP5B1	-0.105858	0.386762
704	AP5M1	0.0923519	0.325755
705	AP5S1	-0.158295	0.226372
706	AP5Z1	-0.237467	0.375266
707	APAF1	-0.0806092	0.577408
708	APBA1	-0.0262504	0.344547
709	APBA2	0.280933	0.570834
710	APBA3	-0.14804	0.271884
711	APBB1	0.407455	0.514957
712	APBB1IP	0.299098	0.586902
713	APBB2	0.229268	0.353708
714	APBB3	-0.0110594	0.444561
715	APC	-0.1211	0.620127
716	APC2	0.133759	0.165862
717	APCDD1	0.138161	0.790177
718	APCDD1L	0.267082	0.116314
719	APEH	-0.0123268	0.377369
720	APEX1	0.0393118	0.451608
721	APEX2	-0.140543	0.264616
722	APH1A	-0.0299264	0.307679
723	APH1B	-0.0604563	0.523208
724	API5	-0.0799527	0.400923
725	APIP	0.119275	0.355415
726	APLF	0.390482	0.215441
727	APLN	0.406243	0.768411
728	APLNR	0.249069	0.646484
729	APLP1	-0.187001	0.548181
730	APLP2	0.11599	0.529614
731	APMAP	0.0944043	0.426697
732	APOA1	-0.0734394	0.302155
733	APOB	0.00284557	0.102695
734	APOBEC2	-0.060884	0.360241
735	APOBEC3A	0.159934	0.191702
736	APOBEC3B	0.246009	0.303324
737	APOBEC3C	0.378926	0.998391
738	APOBEC3D	0.158795	0.0973127
739	APOBEC3F	0.243513	0.487066
740	APOBEC3G	0.270453	0.574196
741	APOBEC3H	0.159758	0.269944
742	APOBR	-0.0513481	0.484637
743	APOC1	0.025423	1.12376
744	APOD	0.0118394	1.26181
745	APOE	-0.073163	1.2237
746	APOF	-0.00932684	1.06725
747	APOL1	0.360812	0.899267
748	APOL2	-0.0811995	0.44084
749	APOL3	0.263077	0.67286
750	APOL4	-0.0463549	1.33066
751	APOL6	0.396724	0.782542
752	APOLD1	-0.0933893	0.833296
753	APOM	0.277641	0.322203
754	APOO	-0.0111612	0.363718
755	APOOL	-0.148518	0.621755
756	APP	-0.0223776	0.828121
757	APPBP2	-0.0423444	0.492933
758	APPL1	-0.0135108	0.505905
759	APPL2	-0.141362	0.565011
760	APRT	-0.0618699	0.690222
761	APTR	0.154897	0.314897
762	APTX	0.0605424	0.192598
763	AQP1	0.163752	0.792304
764	AQP11	0.188723	0.754016
765	AQP3	0.151637	0.982935
766	AQP5	0.313011	0.364264
767	AQP6	-0.197307	0.124245
768	AQP7	0.30436	0.160388
769	AQP8	0.0133024	0.186357
770	AQP9	0.36896	0.302341
771	AQR	-0.0202495	0.445456
772	AR	0.153765	0.632767
773	ARAF	0.127269	0.329315
774	ARAP1	0.0457788	0.438473
775	ARAP2	0.126202	0.419513
776	ARAP3	0.196583	0.501757
777	ARC	0.0815606	0.418254
778	ARCN1	0.144867	0.452607
779	AREG	0.095838	0.932334
780	AREL1	0.192998	0.41223
781	ARF1	0.164947	0.311022
782	ARF3	0.188825	0.345773
783	ARF4	-0.030343	0.492914
784	ARF5	0.118642	0.38629
785	ARF6	0.00304435	0.512336
786	ARFGAP1	0.0524058	0.436043
787	ARFGAP2	0.204375	0.245784
788	ARFGAP3	0.0911248	0.528738
789	ARFGEF1	0.172404	0.48941
790	ARFGEF2	0.034745	0.692368
791	ARFGEF3	0.195556	0.972302
792	ARFIP1	-0.0840708	0.432552
793	ARFIP2	-0.0223936	0.398626
794	ARFRP1	0.179765	0.433848
795	ARG1	-0.387693	0.261639
796	ARG2	0.343874	1.20584
797	ARGLU1	0.0692823	0.606467
798	ARHGAP1	0.315695	0.389315
799	ARHGAP10	0.471547	0.443625
800	ARHGAP11A	0.628691	0.33117
801	ARHGAP11B	0.0973605	0.0890811
802	ARHGAP12	0.0714948	0.598588
803	ARHGAP15	0.474436	0.396079
804	ARHGAP17	0.015719	0.291332
805	ARHGAP18	0.201598	0.634814
806	ARHGAP19	-0.198251	0.365652
807	ARHGAP20	0.372591	0.468569
808	ARHGAP21	0.0136949	0.498427
809	ARHGAP22	0.335276	0.252873
810	ARHGAP23	0.444502	0.68303
811	ARHGAP24	0.179684	0.299618
812	ARHGAP25	0.212489	0.496082
813	ARHGAP26	0.176659	0.470463
814	ARHGAP27	0.0803804	0.421439
815	ARHGAP28	0.249198	0.676094
816	ARHGAP29	-0.151067	0.655733
817	ARHGAP30	0.181549	0.660177
818	ARHGAP31	0.261728	0.524704
819	ARHGAP32	0.0864065	0.613754
820	ARHGAP33	0.270878	0.476207
821	ARHGAP35	-0.0211355	0.526363
822	ARHGAP39	0.236234	0.436653
823	ARHGAP4	-0.153208	0.581701
824	ARHGAP40	0.231158	0.592382
825	ARHGAP42	0.358768	0.371708
826	ARHGAP44	0.209545	0.337701
827	ARHGAP45	0.010611	0.576383
828	ARHGAP5	0.0136857	0.823625
829	ARHGAP6	0.175928	0.570357
830	ARHGAP8	0.130009	0.276577
831	ARHGAP9	0.331314	0.503614
832	ARHGDIA	-0.124626	0.404236
833	ARHGDIB	-0.019955	0.953754
834	ARHGDIG	0.310952	0.795767
835	ARHGEF1	0.00946359	0.391762
836	ARHGEF10	0.079057	0.110135
837	ARHGEF10L	0.295797	0.361247
838	ARHGEF11	0.129116	0.514648
839	ARHGEF12	0.0965507	0.5975
840	ARHGEF15	0.202729	0.442513
841	ARHGEF16	0.0913814	0.429845
842	ARHGEF17	0.33588	0.608023
843	ARHGEF18	-0.0871158	0.223346
844	ARHGEF19	0.127642	0.63971
845	ARHGEF2	0.299319	0.490134
846	ARHGEF25	0.545459	0.496281
847	ARHGEF26	0.555582	0.707753
848	ARHGEF28	0.24196	0.422929
849	ARHGEF3	0.36206	0.637982
850	ARHGEF33	0.115026	0.106583
851	ARHGEF35	0.302528	0.519107
852	ARHGEF37	0.0258482	0.602166
853	ARHGEF38	0.0481315	0.658343
854	ARHGEF39	0.296464	0.208437
855	ARHGEF4	0.305011	0.349056
856	ARHGEF40	0.39495	0.494381
857	ARHGEF5	0.0205346	0.299838
858	ARHGEF6	0.157229	0.587982
859	ARHGEF7	0.208747	0.436929
860	ARHGEF9	0.254445	0.271962
861	ARID1A	0.0178147	0.570427
862	ARID1B	-0.108605	0.408464
863	ARID2	-0.30616	0.48192
864	ARID3A	0.0354755	0.35128
865	ARID3B	-0.0520996	0.268307
866	ARID3C	-0.190027	0.11623
867	ARID4A	0.0721216	0.490491
868	ARID4B	0.0904487	0.435064
869	ARID5A	0.256231	0.79362
870	ARID5B	-0.00477553	0.668804
871	ARIH1	-0.0247315	0.366352
872	ARIH2	0.000427416	0.367724
873	ARL1	-0.0283267	0.426509
874	ARL10	0.237819	0.276048
875	ARL11	0.159229	0.185308
876	ARL13A	0.00791943	0.0899781
877	ARL13B	0.139318	0.44708
878	ARL14EP	0.149933	0.297928
879	ARL15	0.0871907	0.490972
880	ARL16	-0.0861439	0.516606
881	ARL17A	-0.167135	0.132987
882	ARL17B	0.108473	0.144423
883	ARL2	-0.0848183	0.621067
884	ARL2BP	0.204218	0.168631
885	ARL3	-0.0523778	0.344401
886	ARL4A	0.287325	0.532086
887	ARL4C	0.378698	0.734099
888	ARL4D	0.584261	0.71413
889	ARL5A	-0.0337348	0.488146
890	ARL5B	0.228395	0.579491
891	ARL6	0.248914	0.394681
892	ARL6IP1	0.255296	0.460868
893	ARL6IP4	-0.16354	0.165218
894	ARL6IP5	0.0949136	0.516603
895	ARL6IP6	-0.136051	0.411643
896	ARL8A	0.136141	0.247056
897	ARL8B	0.0198554	0.370474
898	ARL9	0.0525303	0.314507
899	ARMC1	0.0549876	0.421435
900	ARMC10	0.092218	0.285915
901	ARMC12	-0.0173673	0.391419
902	ARMC2	-0.0358096	0.216626
903	ARMC5	-0.178762	0.414851
904	ARMC6	-0.157517	0.361562
905	ARMC7	0.118851	0.351466
906	ARMC8	-0.0474726	0.326235
907	ARMC9	0.0104091	0.244788
908	ARMCX1	0.504825	0.986501
909	ARMCX2	0.276175	0.817917
910	ARMCX3	0.0131304	0.422015
911	ARMCX4	0.464685	0.422183
912	ARMCX5	0.0704527	0.340856
913	ARMCX6	0.130171	0.341793
914	ARMH1	0.0727288	0.39857
915	ARMH3	-0.118109	0.338102
916	ARMH4	0.254941	0.262202
917	ARMT1	0.0308777	0.464508
918	ARNT	-0.172109	0.455242
919	ARNT2	0.0991589	0.599964
920	ARPC1A	-0.102782	0.49031
921	ARPC1B	-0.0916494	0.134521
922	ARPC2	-0.0133426	0.371486
923	ARPC3	-0.285643	0.385683
924	ARPC4	-0.0473263	0.448168
925	ARPC5	0.14061	0.290831
926	ARPC5L	0.0155449	0.380219
927	ARPIN	0.236762	0.400555
928	ARPP19	-0.0360272	0.458942
929	ARR3	0.0457061	0.141335
930	ARRB1	0.0947153	0.435248
931	ARRB2	-0.03955	0.428531
932	ARRDC1	-0.122843	0.513173
933	ARRDC2	0.0698737	0.657926
934	ARRDC3	0.192324	0.925451
935	ARRDC4	-0.155796	0.53359
936	ARRDC5	0.394893	0.169492
937	ARSA	0.150555	0.513675
938	ARSB	0.200612	0.402235
939	ARSD	0.0305435	0.54201
940	ARSG	0.150781	0.391974
941	ARSI	0.480534	0.276372
942	ARSJ	0.452527	0.566244
943	ARSK	-0.0206893	0.432949
944	ARSL	0.119737	0.223929
945	ART3	-0.00299674	0.31354
946	ART4	0.0276792	0.502482
947	ART5	0.201921	0.324757
948	ARTN	0.17403	0.398505
949	ARV1	0.0799586	0.32135
950	ARVCF	0.0733993	0.446579
951	ASAH1	0.169251	0.552569
952	ASAH2	0.0663159	0.112194
953	ASAH2B	0.214759	0.236164
954	ASAP1	0.0821083	0.624957
955	ASAP2	0.191367	0.661015
956	ASAP3	0.296648	0.515155
957	ASB1	0.220042	0.333102
958	ASB12	0.136381	0.172509
959	ASB13	-0.0850666	0.414076
960	ASB14	-0.0428924	0.102016
961	ASB16	0.0118519	0.264956
962	ASB2	0.583834	0.694388
963	ASB3	-0.017407	0.411751
964	ASB4	0.184483	0.0743311
965	ASB6	0.103233	0.203579
966	ASB7	0.0353701	0.328125
967	ASB8	0.096612	0.305545
968	ASB9	0.0259294	0.678573
969	ASCC1	0.0563546	0.369809
970	ASCC2	0.136524	0.25392
971	ASCC3	0.253302	0.625786
972	ASCL2	0.0726095	0.788946
973	ASCL5	0.25423	0.11446
974	ASF1A	0.251135	0.450997
975	ASF1B	0.492876	0.647128
976	ASGR1	0.0423884	0.189761
977	ASGR2	-0.0166674	0.159097
978	ASH1L	-0.177218	0.649061
979	ASH2L	-0.0631535	0.416487
980	ASIC1	-0.000907448	0.438035
981	ASIC2	0.35195	0.369097
982	ASIC3	0.0234811	0.555799
983	ASIC4	0.191599	0.0784837
984	ASIP	0.0640869	0.157434
985	ASL	-0.0325903	0.336003
986	ASMT	-0.0405568	0.0812208
987	ASMTL	0.241995	0.31387
988	ASNS	0.185134	0.128565
989	ASNSD1	-0.0625094	0.233902
990	ASPA	0.496328	0.311016
991	ASPDH	-0.042349	0.145028
992	ASPG	0.00205601	0.139724
993	ASPH	-0.0233082	0.63028
994	ASPHD1	-0.119931	0.611706
995	ASPHD2	0.0221566	0.371978
996	ASPM	0.524872	0.34861
997	ASPN	0.226081	0.964564
998	ASPRV1	0.321183	0.237498
999	ASPSCR1	-0.1187	0.452739
1000	ASRGL1	0.142307	0.802695
1001	ASS1	-0.0283279	0.929067
1002	ASTE1	-0.0147674	0.270558
1003	ASTN1	0.267455	0.175137
1004	ASTN2	0.086351	0.750104
1005	ASXL1	-0.113659	0.441358
1006	ASXL2	0.274541	0.557632
1007	ASXL3	0.319861	0.172205
1008	ATAD1	0.115486	0.729575
1009	ATAD2	0.119227	0.60969
1010	ATAD2B	0.152072	0.364587
1011	ATAD3A	-0.0730177	0.4872
1012	ATAD3B	0.114418	0.558102
1013	ATAD3C	0.0613848	0.477804
1014	ATAD5	0.332946	0.235073
1015	ATAT1	0.234329	0.403415
1016	ATE1	0.00383136	0.535817
1017	ATF1	-0.213464	0.54056
1018	ATF2	-0.312661	0.509092
1019	ATF3	0.201139	1.62361
1020	ATF4	0.170265	0.362419
1021	ATF5	-0.0659043	0.580211
1022	ATF6	-0.047503	0.546802
1023	ATF6B	-0.0643148	0.39508
1024	ATF7	-0.138913	0.360796
1025	ATF7IP	-0.0704719	0.592079
1026	ATF7IP2	-0.115228	0.489173
1027	ATG10	0.190481	0.232353
1028	ATG101	-0.0268807	0.387907
1029	ATG12	-0.199073	0.310134
1030	ATG13	-0.0960387	0.283088
1031	ATG14	-0.123343	0.328278
1032	ATG16L1	-0.0446853	0.319904
1033	ATG16L2	-0.0875753	0.489386
1034	ATG2A	-0.151398	0.314196
1035	ATG2B	-0.281231	0.497024
1036	ATG3	0.0231565	0.285161
1037	ATG4A	0.18789	0.364094
1038	ATG4B	-0.027759	0.357617
1039	ATG4C	0.270769	0.371928
1040	ATG4D	-0.0136233	0.307873
1041	ATG5	0.241013	0.434343
1042	ATG7	0.00742386	0.231071
1043	ATG9A	0.0137272	0.647307
1044	ATG9B	0.0506062	0.334944
1045	ATIC	-0.0508435	0.411444
1046	ATL1	0.0338783	0.432523
1047	ATL2	-0.091474	0.5039
1048	ATL3	0.00551948	0.468799
1049	ATM	0.024513	0.522155
1050	ATMIN	0.0132445	0.430658
1051	ATN1	-0.128943	0.43624
1052	ATOH7	0.0587736	0.14092
1053	ATOH8	0.20081	0.64658
1054	ATOX1	-0.306073	0.470245
1055	ATP10A	0.067976	0.338498
1056	ATP10B	-0.0638838	0.0356904
1057	ATP10D	0.354442	0.595288
1058	ATP11A	0.245619	1.07549
1059	ATP11B	-0.00769523	0.833384
1060	ATP11C	0.0199796	0.569542
1061	ATP13A1	-0.107968	0.318838
1062	ATP13A2	-0.0996882	0.396096
1063	ATP13A3	0.199425	0.602634
1064	ATP13A4	0.00279868	0.120319
1065	ATP1A1	0.109969	1.09096
1066	ATP1A2	0.522456	0.967386
1067	ATP1A3	-0.146695	0.0278474
1068	ATP1A4	0.104007	0.119283
1069	ATP1B1	0.358755	0.889027
1070	ATP1B2	0.25184	0.467488
1071	ATP1B3	-0.0733107	0.440089
1072	ATP23	0.0153884	0.227805
1073	ATP2A1	0.257366	0.480947
1074	ATP2A2	0.214451	0.662377
1075	ATP2A3	0.22843	0.852809
1076	ATP2B1	0.0610097	0.589025
1077	ATP2B2	0.0544737	0.0453252
1078	ATP2B4	0.474996	0.967832
1079	ATP2C1	0.0296185	0.664358
1080	ATP2C2	0.291284	0.733408
1081	ATP5F1A	0.125294	0.376348
1082	ATP5F1B	0.102936	0.438631
1083	ATP5F1C	-0.0285114	0.317161
1084	ATP5F1D	0.00387757	0.745075
1085	ATP5F1E	-0.0684979	0.544144
1086	ATP5IF1	-0.128788	0.457802
1087	ATP5MC1	-0.0596203	0.485303
1088	ATP5MC2	-0.126556	0.399175
1089	ATP5MC3	-0.00483678	0.361303
1090	ATP5ME	-0.0362079	0.792025
1091	ATP5MF	-0.00476828	0.584241
1092	ATP5MG	0.012724	0.40417
1093	ATP5MGL	0.118808	0.123877
1094	ATP5PB	0.190542	0.322655
1095	ATP5PD	-0.00116774	0.37561
1096	ATP5PF	-0.0328413	0.376329
1097	ATP5PO	0.0549271	0.548062
1098	ATP6AP1	0.0211501	0.382391
1099	ATP6AP2	-0.0449991	0.385815
1100	ATP6V0A1	0.23062	0.326005
1101	ATP6V0A2	-0.133019	0.276794
1102	ATP6V0B	-0.000542239	0.486533
1103	ATP6V0C	0.149239	0.141385
1104	ATP6V0D1	0.0329857	0.409608
1105	ATP6V0D2	0.279773	0.260066
1106	ATP6V0E1	-0.0618844	0.342124
1107	ATP6V0E2	0.228282	0.606252
1108	ATP6V1A	0.136524	0.591245
1109	ATP6V1B2	0.168372	0.404706
1110	ATP6V1C1	-0.0156537	0.419389
1111	ATP6V1C2	-0.209871	0.572077
1112	ATP6V1D	0.189717	0.329692
1113	ATP6V1E1	0.305973	0.296491
1114	ATP6V1E2	0.285678	0.274235
1115	ATP6V1F	-0.0670704	0.451556
1116	ATP6V1G1	-0.0934592	0.481317
1117	ATP6V1G2	-0.0434322	0.231421
1118	ATP6V1H	0.0436907	0.36839
1119	ATP7A	-0.120249	0.520608
1120	ATP7B	0.1039	0.510239
1121	ATP8A1	0.105574	0.73207
1122	ATP8A2	0.0875015	1.06867
1123	ATP8B1	0.0881722	0.674507
1124	ATP8B2	0.0982378	0.785574
1125	ATP8B3	0.282955	0.101134
1126	ATP8B4	0.088209	0.67357
1127	ATP9A	-0.13086	0.672602
1128	ATP9B	-0.11011	0.299834
1129	ATPAF1	0.277425	0.278035
1130	ATPAF2	0.110043	0.269316
1131	ATPSCKMT	0.0333688	0.297882
1132	ATR	0.284328	0.386552
1133	ATRAID	0.0907797	0.298638
1134	ATRIP	-0.0824764	0.280423
1135	ATRN	0.0184297	0.535792
1136	ATRNL1	0.349419	0.350749
1137	ATRX	-0.0719932	0.576642
1138	ATXN1	-0.155557	0.559948
1139	ATXN10	-0.141432	0.385432
1140	ATXN1L	-0.0427244	0.562117
1141	ATXN2	-0.119575	0.419824
1142	ATXN2L	0.102395	0.547851
1143	ATXN3	-0.173049	0.270744
1144	ATXN7	-0.165794	0.442547
1145	ATXN7L1	0.210314	0.360887
1146	ATXN7L2	0.185836	0.234828
1147	ATXN7L3	0.168745	0.344457
1148	ATXN7L3B	-0.0146841	0.428526
1149	AUH	0.212814	0.523087
1150	AUNIP	0.539737	0.19507
1151	AUP1	-0.344315	0.373035
1152	AURKA	0.540377	0.46374
1153	AURKAIP1	-0.00772889	0.608794
1154	AURKB	0.448146	0.529706
1155	AURKC	0.00825089	0.220834
1156	AUTS2	0.188986	0.473499
1157	AVEN	-0.358061	0.318985
1158	AVIL	0.147529	0.277738
1159	AVL9	0.308213	0.478916
1160	AVPI1	0.420493	0.715001
1161	AVPR1A	0.308886	0.435185
1162	AVPR2	0.104191	0.274725
1163	AXDND1	-0.155634	0.114129
1164	AXIN1	-0.0551005	0.309711
1165	AXIN2	0.507573	0.539636
1166	AXL	0.375431	0.721441
1167	AZGP1	0.317658	1.58748
1168	AZI2	0.0697444	0.374824
1169	AZIN1	-0.081424	0.619772
1170	AZIN2	0.198426	0.236953
1171	AZU1	-0.0193152	0.218467
1172	B2M	0.280313	0.773024
1173	B3GALNT1	0.210589	0.504648
1174	B3GALNT2	0.341061	0.34743
1175	B3GALT1	-0.274414	0.162327
1176	B3GALT2	0.459226	0.500516
1177	B3GALT4	0.304975	0.497057
1178	B3GALT5	0.0252504	0.250849
1179	B3GALT6	-0.0641436	0.514129
1180	B3GAT1	-0.0400189	0.913269
1181	B3GAT2	0.165552	0.0492841
1182	B3GAT3	-0.00421929	0.496525
1183	B3GLCT	-0.0112963	0.345171
1184	B3GNT2	0.243945	0.544154
1185	B3GNT4	0.0838569	0.139905
1186	B3GNT5	-0.0185591	0.717278
1187	B3GNT7	0.305468	0.403677
1188	B3GNT8	0.389332	0.38375
1189	B3GNT9	0.480462	0.627277
1190	B3GNTL1	0.045087	0.245791
1191	B4GALNT1	0.538149	0.254134
1192	B4GALNT3	0.036842	0.515439
1193	B4GALNT4	0.226596	0.914413
1194	B4GALT1	0.360375	0.581857
1195	B4GALT2	0.0664431	0.33065
1196	B4GALT3	0.0539494	0.322996
1197	B4GALT4	-0.0635745	0.297823
1198	B4GALT5	0.00740628	0.591368
1199	B4GALT6	0.0880436	0.41253
1200	B4GALT7	-0.173284	0.391695
1201	B4GAT1	0.279898	0.354878
1202	B9D1	0.0607527	0.295823
1203	B9D2	-0.227889	0.417358
1204	BAALC	0.0906999	0.185013
1205	BAAT	0.161812	0.104823
1206	BABAM1	0.217291	0.4745
1207	BABAM2	0.0701832	0.296018
1208	BACE1	0.269841	0.337326
1209	BACE2	0.0766255	0.92785
1210	BACH1	-0.240096	0.649741
1211	BACH2	0.156628	0.26774
1212	BAD	0.0142772	0.534225
1213	BAG1	-0.203425	0.396735
1214	BAG2	0.00375805	0.518972
1215	BAG3	0.218082	0.533391
1216	BAG4	-0.248535	0.510715
1217	BAG5	-0.118181	0.358769
1218	BAG6	-0.023971	0.266717
1219	BAHCC1	-0.0222869	0.385632
1220	BAHD1	0.00548766	0.311772
1221	BAIAP2	0.111259	0.474884
1222	BAIAP2L1	0.202576	0.448108
1223	BAIAP2L2	0.286164	0.936235
1224	BAIAP3	0.0721227	0.612841
1225	BAK1	0.231874	0.327318
1226	BAMBI	0.343893	0.996134
1227	BANF1	-0.271679	0.43823
1228	BANK1	0.13009	1.20229
1229	BANP	-0.257522	0.233748
1230	BAP1	0.0657811	0.237896
1231	BARD1	-0.015741	0.431552
1232	BARX2	0.110261	0.694566
1233	BASP1	0.105821	0.972195
1234	BATF	0.0338598	0.803841
1235	BATF2	0.348733	0.453619
1236	BATF3	0.102427	0.3471
1237	BAX	-0.368324	0.496056
1238	BAZ1A	0.150111	0.527421
1239	BAZ1B	-0.0274618	0.467957
1240	BAZ2A	0.076592	0.675888
1241	BAZ2B	-0.193056	0.424348
1242	BBC3	-0.0352793	0.493904
1243	BBIP1	-0.311456	0.241622
1244	BBOF1	-0.0825643	0.281322
1245	BBOX1	-0.0707006	0.394758
1246	BBS1	0.206015	0.0947229
1247	BBS10	0.0606518	0.505447
1248	BBS12	-0.126442	0.34726
1249	BBS2	0.181332	0.401467
1250	BBS4	0.265928	0.65514
1251	BBS5	0.38613	0.251869
1252	BBS7	-0.0641415	0.371109
1253	BBS9	0.0467184	0.268776
1254	BBX	-0.0653473	0.649906
1255	BCAM	-0.127025	0.757952
1256	BCAN	0.232327	0.157216
1257	BCAP29	-0.0323977	0.167833
1258	BCAP31	0.0613927	0.342627
1259	BCAR1	-0.000119296	0.381172
1260	BCAR3	0.268748	0.441101
1261	BCAS1	0.399205	0.900266
1262	BCAS2	0.0648079	0.357333
1263	BCAS3	0.193726	0.292898
1264	BCAS4	0.23274	0.371557
1265	BCAT1	0.285352	0.456275
1266	BCAT2	-0.112134	0.558785
1267	BCCIP	0.262401	0.292189
1268	BCDIN3D	0.137848	0.236533
1269	BCHE	0.118444	0.699882
1270	BCKDHA	0.0861085	0.105578
1271	BCKDHB	-0.0855633	0.544919
1272	BCKDK	0.011381	0.300461
1273	BCL10	-0.109819	0.376638
1274	BCL11A	0.174161	0.359897
1275	BCL11B	0.221898	0.360264
1276	BCL2	0.272965	0.647369
1277	BCL2A1	0.356909	0.631522
1278	BCL2L1	0.166284	0.306478
1279	BCL2L10	-0.0181199	0.537869
1280	BCL2L11	-0.18033	0.449575
1281	BCL2L12	0.0912527	0.395022
1282	BCL2L13	-0.0640797	0.326087
1283	BCL2L14	-0.0546393	0.444207
1284	BCL2L15	-0.148547	0.190448
1285	BCL2L2	0.168761	0.414574
1286	BCL3	-0.11854	0.763162
1287	BCL6	0.116813	0.620779
1288	BCL6B	0.163263	0.51545
1289	BCL7A	-0.203077	0.439795
1290	BCL7B	0.291989	0.262106
1291	BCL7C	0.22924	0.385889
1292	BCL9	0.0783723	0.607206
1293	BCL9L	0.0346856	0.76583
1294	BCLAF1	-0.127388	0.473891
1295	BCLAF3	-0.0940124	0.349199
1296	BCO1	0.306903	0.277512
1297	BCO2	0.0645377	0.149683
1298	BCOR	-0.0170153	0.741358
1299	BCORL1	-0.117002	0.457636
1300	BCR	-0.0780263	0.328938
1301	BCS1L	0.084041	0.347833
1302	BDH1	0.275032	0.427759
1303	BDH2	0.324483	0.507648
1304	BDKRB1	0.0754916	0.0998379
1305	BDKRB2	0.421604	0.452481
1306	BDNF	0.349678	0.199
1307	BDP1	0.119764	0.58892
1308	BEAN1	0.0766671	0.152361
1309	BECN1	0.15821	0.509319
1310	BEGAIN	0.500568	0.210061
1311	BEND3	0.328615	0.571172
1312	BEND4	-0.0631443	1.0247
1313	BEND5	0.329987	0.398239
1314	BEND6	0.367784	0.21101
1315	BEND7	-0.074108	0.395609
1316	BEST1	0.234904	0.207329
1317	BEST4	-0.277211	0.128934
1318	BET1	0.039316	0.280014
1319	BET1L	-0.201053	0.242662
1320	BEX1	0.352894	1.00951
1321	BEX2	0.147857	0.693295
1322	BEX3	0.206069	0.426075
1323	BEX4	0.231657	0.482168
1324	BEX5	0.142179	1.01483
1325	BFAR	0.10337	0.32942
1326	BFSP1	-0.0177122	0.201417
1327	BFSP2	0.0670808	0.0581873
1328	BGLAP	0.0240348	0.370368
1329	BGN	0.00613848	0.964208
1330	BHLHA15	0.0059234	1.04088
1331	BHLHE22	0.18299	0.160674
1332	BHLHE40	0.147577	1.16563
1333	BHLHE41	0.171991	0.938585
1334	BHMT	0.218108	0.0614656
1335	BHMT2	0.520551	0.534953
1336	BICC1	-0.039573	0.683612
1337	BICD1	0.334597	0.791837
1338	BICD2	-0.00544022	0.458144
1339	BICDL1	0.200641	0.494262
1340	BICDL2	-0.380363	0.647924
1341	BICRA	0.0220963	0.334619
1342	BICRAL	-0.157064	0.522728
1343	BID	-0.200454	0.329442
1344	BIK	-0.0264346	0.638185
1345	BIN1	0.559413	0.503608
1346	BIN2	0.351667	0.545171
1347	BIN3	0.460067	0.314271
1348	BIRC2	-0.108095	0.468635
1349	BIRC3	0.266778	0.899887
1350	BIRC5	0.540876	0.647703
1351	BIRC6	0.000930985	0.586562
1352	BIRC7	-0.0772887	0.199207
1353	BISPR	0.0707926	0.374114
1354	BIVM	-0.102426	0.291889
1355	BLACAT1	0.147136	0.0681434
1356	BLCAP	-0.0276324	0.308543
1357	BLK	0.18046	0.358317
1358	BLM	0.538809	0.232275
1359	BLMH	0.00580716	0.374952
1360	BLNK	0.208268	0.392827
1361	BLOC1S1	0.124733	0.681376
1362	BLOC1S2	-0.0997955	0.353505
1363	BLOC1S3	-0.105176	0.255107
1364	BLOC1S4	-0.128815	0.338109
1365	BLOC1S5	-0.16934	0.268366
1366	BLOC1S6	0.0470473	0.519381
1367	BLVRA	0.26081	0.432834
1368	BLVRB	0.178655	0.58512
1369	BLZF1	0.0730038	0.40822
1370	BMERB1	0.497216	0.57492
1371	BMF	-0.0159937	0.600095
1372	BMI1	-0.0898016	0.423459
1373	BMP1	0.478537	0.404358
1374	BMP2	0.0803213	0.575582
1375	BMP2K	0.191633	0.276283
1376	BMP4	0.316291	0.69654
1377	BMP5	0.0176319	0.824829
1378	BMP6	0.118263	0.879579
1379	BMP7	0.304431	0.851778
1380	BMP8A	-0.031837	0.386672
1381	BMP8B	0.015335	0.434016
1382	BMPER	0.440952	0.476312
1383	BMPR1A	0.0269658	0.460932
1384	BMPR1B	-0.11166	0.808357
1385	BMPR2	-0.239052	0.659363
1386	BMS1	0.0272708	0.352042
1387	BMS1P4	0.111127	0.137449
1388	BMX	-0.0119868	0.499617
1389	BNC1	0.14655	0.136833
1390	BNC2	0.368615	0.36199
1391	BNIP1	0.0229514	0.336174
1392	BNIP2	0.052566	0.454448
1393	BNIP3	0.215499	0.448882
1394	BNIP3L	0.258681	0.579731
1395	BNIPL	0.263127	0.674154
1396	BOC	0.527188	0.646006
1397	BOD1	-0.176723	0.335381
1398	BOD1L1	-0.0721521	0.577548
1399	BOK	-0.0887182	0.583337
1400	BOLA1	-0.0359223	0.426312
1401	BOLA2B	-0.123011	0.236739
1402	BOLA3	-0.0284134	0.350201
1403	BOP1	0.0679064	0.610102
1404	BORA	0.248516	0.228496
1405	BORCS5	-0.0064236	0.24033
1406	BORCS6	-0.0234043	0.489134
1407	BORCS7	0.0428008	0.446933
1408	BORCS8	0.0778642	0.341321
1409	BPGM	-0.253993	0.370713
1410	BPHL	0.396859	0.355576
1411	BPI	0.328232	0.116207
1412	BPNT1	0.139843	0.394736
1413	BPNT2	0.00879508	0.521738
1414	BPTF	0.0549247	0.585684
1415	BRAF	0.277875	0.35885
1416	BRAP	0.0998445	0.241688
1417	BRAT1	-0.135555	0.416449
1418	BRCA1	0.459669	0.34958
1419	BRCA2	0.441807	0.184464
1420	BRCC3	0.119716	0.441875
1421	BRD1	-0.0920458	0.378225
1422	BRD2	0.0165652	0.433256
1423	BRD3	0.161272	0.605965
1424	BRD3OS	-0.258842	0.369569
1425	BRD4	-0.081955	0.310041
1426	BRD7	-0.0589932	0.255695
1427	BRD8	-0.0443901	0.371795
1428	BRD9	0.0146517	0.264401
1429	BRF1	0.0397372	0.246437
1430	BRF2	-0.0511055	0.405165
1431	BRI3	-0.247374	0.475455
1432	BRI3BP	0.21411	0.470996
1433	BRICD5	0.054281	0.47493
1434	BRINP1	0.16252	0.62298
1435	BRINP2	0.203888	0.0405574
1436	BRIP1	0.443233	0.211334
1437	BRIX1	0.205167	0.295694
1438	BRK1	0.0207213	0.293962
1439	BRMS1	-0.177858	0.47276
1440	BRMS1L	-0.165237	0.326824
1441	BROX	0.0569383	0.48809
1442	BRPF1	-0.119698	0.333638
1443	BRPF3	-0.0521132	0.637584
1444	BRSK1	-0.033138	0.612099
1445	BRSK2	0.192928	0.812225
1446	BRWD1	-0.0543594	0.430153
1447	BRWD3	0.0406971	0.402131
1448	BSCL2	0.134497	0.174965
1449	BSDC1	0.103798	0.286388
1450	BSG	-0.0658795	0.456413
1451	BSN	0.272783	0.141948
1452	BSPRY	0.0595783	0.406135
1453	BST1	0.303408	0.269682
1454	BST2	0.223363	1.1206
1455	BTAF1	-0.234431	0.678221
1456	BTBD1	0.157802	0.376072
1457	BTBD10	-0.0100451	0.304532
1458	BTBD16	0.0861529	0.210195
1459	BTBD18	-0.01447	0.0239143
1460	BTBD19	0.371348	0.338234
1461	BTBD2	0.00587558	0.320095
1462	BTBD3	0.165214	0.495476
1463	BTBD6	-0.00977886	0.355147
1464	BTBD7	0.0431326	0.444322
1465	BTBD8	-0.00622171	0.332901
1466	BTBD9	-0.0821529	0.359723
1467	BTC	0.0786113	0.380317
1468	BTD	0.00948679	0.43686
1469	BTF3	-0.0427095	0.470354
1470	BTF3L4	0.322754	0.311862
1471	BTG1	0.00948793	0.504102
1472	BTG2	0.130723	1.14045
1473	BTG3	0.1069	0.60697
1474	BTK	0.13215	0.426109
1475	BTLA	0.202556	0.280618
1476	BTN2A1	0.252257	0.399272
1477	BTN2A2	0.275178	0.42034
1478	BTN3A1	0.305095	0.61393
1479	BTN3A2	0.272841	0.693002
1480	BTN3A3	0.342055	0.569167
1481	BTNL8	0.0814163	0.0280194
1482	BTNL9	-0.0436783	0.396958
1483	BTRC	-0.155575	0.447275
1484	BUB1	0.592739	0.463252
1485	BUB1B	0.551955	0.454705
1486	BUB3	0.21246	0.361326
1487	BUD13	0.0348168	0.278015
1488	BUD23	0.0775673	0.333861
1489	BUD31	-0.0422939	0.297759
1490	BYSL	-0.088149	0.352749
1491	BZW1	-0.04829	0.482317
1492	BZW2	0.301917	0.523381
1493	C10orf143	0.203154	0.195266
1494	C10orf55	0.322026	0.0518819
1495	C10orf67	-0.199393	0.0168774
1496	C10orf88	0.169582	0.280225
1497	C11orf16	-0.157013	0.165789
1498	C11orf21	0.266165	0.199816
1499	C11orf24	-0.156504	0.328573
1500	C11orf42		0.328573
1501	C11orf54	0.0914661	0.392021
1502	C11orf58	0.0460846	0.301798
1503	C11orf65	-0.00238121	0.087014
1504	C11orf68	0.108	0.315275
1505	C11orf71	0.0579272	0.535187
1506	C11orf91	0.154724	0.0807418
1507	C11orf96	0.386509	1.10502
1508	C12orf42	0.237843	0.041957
1509	C12orf43	-0.00668001	0.172711
1510	C12orf56	-0.121315	0.48767
1511	C12orf57	0.313126	0.748761
1512	C12orf60	0.226417	0.481032
1513	C12orf71		0.481032
1514	C12orf75	0.459208	0.720005
1515	C12orf76	0.026715	0.276192
1516	C13orf46	0.138703	0.588131
1517	C14orf119	0.0636485	0.230669
1518	C14orf132	0.131914	0.626617
1519	C14orf28	0.175793	0.224485
1520	C14orf93	-0.0372391	0.250362
1521	C15orf39	0.114002	0.506595
1522	C15orf40	0.0752171	0.170608
1523	C15orf48	-0.136647	1.64956
1524	C15orf61	0.10344	0.263999
1525	C15orf62	-0.126129	0.227495
1526	C16orf54	0.128474	0.622814
1527	C16orf74	0.261372	0.437026
1528	C16orf86	0.328035	0.350538
1529	C16orf87	0.291605	0.301467
1530	C16orf89	0.345091	0.667846
1531	C16orf95	0.279215	0.120978
1532	C16orf96	-0.134802	0.117756
1533	C17orf100	-0.170979	0.313867
1534	C17orf107	-0.118227	0.31178
1535	C17orf113	-0.125034	0.304316
1536	C17orf58	0.119668	0.536203
1537	C17orf67	-0.0127574	0.283501
1538	C17orf75	0.199194	0.254547
1539	C17orf78	0.159822	0.104776
1540	C17orf99	-0.0403388	0.0750808
1541	C18orf21	-0.0270384	0.328728
1542	C18orf32	0.0242566	0.19088
1543	C18orf54	0.0559203	0.20453
1544	C19orf12	0.332402	0.208382
1545	C19orf18	-0.11164	0.648494
1546	C19orf25	-0.0192801	0.36403
1547	C19orf38	0.047373	0.345591
1548	C19orf44	0.170094	0.224019
1549	C19orf47	0.110612	0.213328
1550	C19orf53	-0.127895	0.498202
1551	C19orf67	-0.00341253	0.0927568
1552	C19orf73	-0.0920333	0.595499
1553	C19orf81	0.0428068	0.98532
1554	C19orf84	-0.0411069	0.039912
1555	C1D	-0.0424974	0.347079
1556	C1GALT1	0.0819328	0.409281
1557	C1GALT1C1	0.0356073	0.41029
1558	C1GALT1C1L	0.0454186	0.372344
1559	C1QA	0.103294	0.904706
1560	C1QB	0.148864	0.905016
1561	C1QBP	0.0982304	0.43886
1562	C1QC	0.140513	0.885078
1563	C1QL1	0.202512	0.396582
1564	C1QL3	0.0775423	0.395203
1565	C1QL4	-0.033938	0.0767331
1566	C1QTNF1	0.525141	0.70171
1567	C1QTNF12	-0.0593825	0.251085
1568	C1QTNF2	0.206097	0.392871
1569	C1QTNF3	0.240281	0.958968
1570	C1QTNF4	0.303088	0.290254
1571	C1QTNF6	0.108208	0.395991
1572	C1QTNF7	0.356218	0.560182
1573	C1R	0.333419	0.941924
1574	C1RL	0.172282	0.702902
1575	C1S	0.364409	0.978224
1576	C1orf115	0.26522	0.767863
1577	C1orf116	0.145022	0.549937
1578	C1orf122	-0.0424408	0.59927
1579	C1orf127	0.107311	0.107357
1580	C1orf131	0.150547	0.307037
1581	C1orf146	0.0507785	0.0686645
1582	C1orf159	0.0158132	0.386971
1583	C1orf162	0.094053	0.422505
1584	C1orf174	-0.00460715	0.260443
1585	C1orf198	0.131592	0.401045
1586	C1orf21	0.299539	0.497953
1587	C1orf210	0.15533	0.413497
1588	C1orf216	0.178656	0.331648
1589	C1orf220	-0.105629	0.163536
1590	C1orf226	-0.0520243	0.518638
1591	C1orf35	0.0151072	0.443259
1592	C1orf43	0.0688643	0.36855
1593	C1orf50	0.0605788	0.255305
1594	C1orf52	0.250409	0.253335
1595	C1orf53	-0.22873	0.555784
1596	C1orf54	0.511258	0.600937
1597	C1orf56	0.101515	0.361287
1598	C1orf74	0.314894	0.392019
1599	C2	0.125406	0.626548
1600	C20orf144	0.0985966	0.240811
1601	C20orf202	0.00989844	0.0654517
1602	C20orf204	0.22436	0.189794
1603	C20orf96	-0.138614	0.565883
1604	C21orf58	0.294771	0.353855
1605	C21orf91	0.291846	0.406513
1606	C22orf15	-0.0365593	0.147631
1607	C22orf23	-0.0431134	0.375066
1608	C22orf31	0.300432	0.165613
1609	C22orf39	0.433617	0.252601
1610	C2CD2	0.0327594	0.406123
1611	C2CD2L	-0.0241474	0.345951
1612	C2CD3	-0.00793559	0.359891
1613	C2CD4A	0.155426	0.659795
1614	C2CD4B	0.0193487	0.6985
1615	C2CD4C	-0.0808583	0.532234
1616	C2CD4D	-0.148598	0.448965
1617	C2CD5	-0.0766683	0.466234
1618	C2CD6	0.122251	0.106731
1619	C2orf15	0.124237	0.348042
1620	C2orf42	-0.186025	0.202574
1621	C2orf49	-0.0956458	0.391721
1622	C2orf66	-0.0308172	0.136516
1623	C2orf68	0.106478	0.23296
1624	C2orf69	0.328951	0.481787
1625	C2orf72	0.0402435	1.22677
1626	C2orf74	0.0734967	0.180295
1627	C2orf76	0.354156	0.332524
1628	C2orf81	-0.22718	0.20317
1629	C2orf88	0.436883	0.442065
1630	C2orf92	0.199855	0.239528
1631	C3	0.195945	1.38519
1632	C3AR1	0.257796	0.572858
1633	C3orf18	0.398208	0.410485
1634	C3orf20	0.2142	0.062852
1635	C3orf33	0.0489417	0.245614
1636	C3orf38	0.0972315	0.377831
1637	C3orf49	-0.00503406	0.0490668
1638	C3orf52	-0.0783376	0.397634
1639	C3orf62	-0.217178	0.323459
1640	C3orf70	0.514286	0.581228
1641	C3orf80	0.251775	0.338649
1642	C4A	0.187837	1.0307
1643	C4B	0.194077	1.07332
1644	C4BPA	0.124139	0.208533
1645	C4BPB	-0.128221	0.0526907
1646	C4orf19	0.229443	0.529282
1647	C4orf3	0.0388571	0.396105
1648	C4orf33	0.147	0.286593
1649	C4orf46	0.188607	0.348033
1650	C4orf50	0.0914341	0.101815
1651	C5	0.0406977	0.550702
1652	C5AR1	0.209063	0.671898
1653	C5AR2	0.122925	0.0957153
1654	C5orf15	0.217186	0.542244
1655	C5orf22	-0.0126525	0.459428
1656	C5orf24	0.100122	0.613351
1657	C5orf34	-0.109612	0.225752
1658	C5orf58	0.0219844	0.0592733
1659	C5orf63	0.354134	0.244005
1660	C6	-0.0316315	0.384146
1661	C6orf120	0.286415	0.518481
1662	C6orf132	0.068027	0.445582
1663	C6orf136	0.186961	0.31715
1664	C6orf141	-0.0743329	0.328199
1665	C6orf163	-0.02721	0.23072
1666	C6orf226	-0.167503	0.690207
1667	C6orf47	0.376335	0.224063
1668	C6orf52	0.166045	0.505235
1669	C6orf58	0.159736	0.0971244
1670	C6orf62	0.103675	0.428396
1671	C6orf89	0.23217	0.317514
1672	C7	0.46512	1.12914
1673	C7orf25	-0.220058	0.0980405
1674	C7orf50	-0.103115	0.496124
1675	C7orf57	-0.173194	0.248653
1676	C8G	0.159313	0.312688
1677	C8orf33	0.186048	0.405427
1678	C8orf48	0.20235	0.111407
1679	C8orf58	0.303711	0.330525
1680	C8orf76	-0.0828174	0.33042
1681	C8orf82	0.0189537	0.614091
1682	C8orf88	0.541848	0.512035
1683	C9orf152	-0.150467	0.693891
1684	C9orf153	0.151495	0.0833304
1685	C9orf163	0.347045	0.252255
1686	C9orf40	-0.0466643	0.331403
1687	C9orf43	0.141115	0.207306
1688	C9orf50	0.0348427	0.0809437
1689	C9orf72	-0.0734556	0.501409
1690	C9orf78	0.165829	0.261285
1691	C9orf85	0.234002	0.286753
1692	CA11	0.593625	0.62662
1693	CA12	0.0510742	0.592705
1694	CA13	0.17085	0.562413
1695	CA14	0.42116	0.47447
1696	CA2	0.246711	0.679315
1697	CA3	-0.140205	1.21442
1698	CA4	0.0090086	0.426318
1699	CA5B	0.0171878	0.442576
1700	CA8	-0.0637586	0.538579
1701	CA9	-0.0908974	0.183532
1702	CAAP1	-0.0755507	0.41424
1703	CAB39	-0.0175668	0.488189
1704	CAB39L	0.1512	0.600361
1705	CABCOCO1	0.0615765	0.76674
1706	CABIN1	0.00975621	0.319573
1707	CABLES1	0.194823	0.373355
1708	CABLES2	0.22468	0.320493
1709	CABP1	0.399449	0.167133
1710	CABP4	0.26747	0.417566
1711	CABP7	-0.0663818	0.0803243
1712	CABYR	0.235882	0.180512
1713	CACFD1	0.0244474	0.467049
1714	CACHD1	0.387313	0.629242
1715	CACNA1A	-0.00754463	0.0813257
1716	CACNA1C	0.326063	0.453883
1717	CACNA1D	0.160507	1.20166
1718	CACNA1E	0.28089	0.0141838
1719	CACNA1F	0.335466	0.0400598
1720	CACNA1G	0.300264	0.483192
1721	CACNA1H	0.157208	0.893546
1722	CACNA1I	0.269158	0.200409
1723	CACNA1S	-0.024809	0.160201
1724	CACNA2D1	0.337619	0.828126
1725	CACNA2D2	-0.128567	0.429924
1726	CACNA2D3	0.407347	0.325993
1727	CACNA2D4	0.356097	0.119397
1728	CACNB1	0.226538	0.372913
1729	CACNB2	0.341683	0.271818
1730	CACNB3	-0.0498151	0.449279
1731	CACNB4	0.291611	0.212433
1732	CACNG4	0.3195	1.20153
1733	CACNG8	0.218319	0.0416115
1734	CACTIN	0.149993	0.242201
1735	CACUL1	0.0282781	0.373664
1736	CACYBP	-0.111354	0.339651
1737	CAD	0.285701	0.483058
1738	CADM1	0.081357	0.691556
1739	CADM2	-0.273674	0.623186
1740	CADM3	0.409593	0.380874
1741	CADM4	0.364042	0.424084
1742	CADPS	0.40174	0.856213
1743	CADPS2	0.112486	0.568833
1744	CAGE1	0.238911	0.0435547
1745	CAHM	0.100025	0.408544
1746	CALB1	-0.144634	0.0505591
1747	CALB2	0.343157	0.186761
1748	CALCB	0.169588	0.104551
1749	CALCOCO1	0.100419	0.42148
1750	CALCOCO2	-0.18857	0.347032
1751	CALCR	0.0425017	0.0278706
1752	CALCRL	0.159209	0.740141
1753	CALD1	0.442772	0.853665
1754	CALHM2	0.410289	0.522274
1755	CALHM5	0.216264	0.259304
1756	CALHM6	0.345544	0.320074
1757	CALM1	0.456342	0.468213
1758	CALM2	-0.0764008	0.327628
1759	CALM3	0.217866	0.289411
1760	CALML4	0.0253193	0.0321825
1761	CALML6	-0.0190487	0.28594
1762	CALN1	-0.0370499	0.287271
1763	CALR	0.0570017	0.494494
1764	CALU	0.0717583	0.580856
1765	CALY	0.0664761	0.162489
1766	CAMK1	0.26021	0.416346
1767	CAMK1D	0.324132	0.620605
1768	CAMK1G	0.431584	0.335159
1769	CAMK2A	0.386766	0.240066
1770	CAMK2B	-0.0645242	0.739724
1771	CAMK2D	-0.000982468	0.592559
1772	CAMK2G	0.405159	0.434647
1773	CAMK2N1	-0.00745746	1.08487
1774	CAMK2N2	-0.11699	0.638765
1775	CAMK4	0.229981	0.426833
1776	CAMKK1	0.0174512	0.436147
1777	CAMKK2	0.398377	0.855168
1778	CAMKMT	-0.0653951	0.231532
1779	CAMLG	-0.0188127	0.288609
1780	CAMP	0.151837	0.291822
1781	CAMSAP1	0.143382	0.450162
1782	CAMSAP2	-0.157258	0.524869
1783	CAMSAP3	-0.0561254	0.439894
1784	CAMTA1	-0.0380373	0.236529
1785	CAMTA2	0.0996044	0.382182
1786	CAND1	0.0563151	0.530153
1787	CAND2	0.483267	0.415167
1788	CANT1	0.112032	0.547337
1789	CANX	-0.0122233	0.619404
1790	CAP1	0.272985	0.363847
1791	CAP2	0.490397	0.69113
1792	CAPG	0.219289	0.906689
1793	CAPN1	0.0648856	0.383173
1794	CAPN10	-0.0847957	0.356119
1795	CAPN11	-0.0783075	0.109592
1796	CAPN12	-0.342979	0.216265
1797	CAPN13	0.143526	0.570614
1798	CAPN14	-0.124987	0.120942
1799	CAPN15	0.218875	0.378964
1800	CAPN2	-0.0617739	0.635019
1801	CAPN3	0.200589	0.165295
1802	CAPN5	-0.109856	0.862017
1803	CAPN6	0.48773	0.800566
1804	CAPN7	-0.0624452	0.456139
1805	CAPN8	0.205033	0.449608
1806	CAPN9	0.108575	0.560215
1807	CAPNS1	-0.148567	0.360239
1808	CAPRIN1	0.0982299	0.561094
1809	CAPRIN2	-0.00368278	0.344107
1810	CAPS	-0.0294396	0.837588
1811	CAPS2	-0.0013918	0.27113
1812	CAPZA1	0.112343	0.43477
1813	CAPZA2	0.0362851	0.484497
1814	CAPZB	0.275318	0.263766
1815	CARD10	0.118983	0.43158
1816	CARD11	0.212505	0.518762
1817	CARD14	-0.1365	0.2612
1818	CARD16	0.128621	0.507166
1819	CARD19	0.0531612	0.375748
1820	CARD6	0.259816	0.364417
1821	CARD8	0.130582	0.294611
1822	CARD9	-0.165207	0.288304
1823	CARF	0.107192	0.296337
1824	CARHSP1	-0.267942	0.369502
1825	CARM1	0.0406853	0.486878
1826	CARMIL1	0.0271304	0.523197
1827	CARMIL2	0.106642	0.347885
1828	CARMIL3	0.101142	0.129633
1829	CARNMT1	0.185488	0.448109
1830	CARNS1	0.20026	0.215369
1831	CARS1	-0.1396	0.278321
1832	CARS2	-0.074879	0.356608
1833	CASC11	0.0743154	0.215128
1834	CASC18	0.325214	0.0646855
1835	CASC2	-0.0165688	0.127667
1836	CASC3	0.0499733	0.350263
1837	CASC8	0.218099	0.338953
1838	CASC9	0.0184746	0.236351
1839	CASD1	0.237921	0.5223
1840	CASK	0.138593	0.317936
1841	CASKIN1	0.422371	0.382331
1842	CASKIN2	0.275407	0.366443
1843	CASP1	0.252072	0.602869
1844	CASP10	0.388827	0.478328
1845	CASP2	-0.132539	0.601899
1846	CASP3	0.0739463	0.390293
1847	CASP4	0.304785	0.457194
1848	CASP5	0.34859	0.0568522
1849	CASP6	0.179424	0.365849
1850	CASP7	0.275253	0.577607
1851	CASP8	0.377765	0.465642
1852	CASP8AP2	0.0474776	0.552492
1853	CASP9	0.00444244	0.266418
1854	CASQ1	0.531139	0.780531
1855	CASQ2	0.318758	0.784189
1856	CASR	-0.0372488	0.0171337
1857	CASS4	0.222108	0.247842
1858	CAST	-0.114598	0.520006
1859	CASTOR1	0.0931533	0.130642
1860	CASTOR2	0.0743061	0.36574
1861	CASZ1	0.0288463	0.468566
1862	CAT	0.0103319	0.604809
1863	CATIP	-0.173144	0.295729
1864	CATSPER1	0.034896	0.075565
1865	CATSPER2	0.210437	0.254252
1866	CATSPER3	0.181718	0.18935
1867	CATSPERB	-0.28145	0.2949
1868	CATSPERE	0.0432332	0.128104
1869	CATSPERG	-0.134729	0.197597
1870	CAV1	0.55486	0.886194
1871	CAV2	0.45811	0.643021
1872	CAVIN1	0.547305	0.778434
1873	CAVIN2	0.346058	0.846763
1874	CAVIN3	0.336776	0.705426
1875	CAVIN4	-0.0287932	0.384452
1876	CBARP	-0.0560033	0.231067
1877	CBFA2T2	-0.0999103	0.552937
1878	CBFA2T3	-0.244768	0.495196
1879	CBFB	-0.0774366	0.512104
1880	CBL	0.105867	0.50532
1881	CBLB	0.231203	0.397547
1882	CBLC	-0.20469	0.927038
1883	CBLL1	-0.0221365	0.633575
1884	CBLN1	-0.0288651	0.253958
1885	CBLN3	0.231397	0.409059
1886	CBLN4	0.0693738	0.0977526
1887	CBR1	0.203979	0.533939
1888	CBR3	-0.189798	0.802522
1889	CBR4	-0.0133663	0.559403
1890	CBS	0.059077	0.489523
1891	CBX1	-0.0175132	0.381759
1892	CBX2	0.453239	0.541653
1893	CBX3	0.19058	0.453253
1894	CBX4	0.283532	0.505963
1895	CBX5	-0.122871	0.537339
1896	CBX6	0.125509	0.558312
1897	CBX7	0.449309	0.461073
1898	CBX8	0.54336	0.406197
1899	CBY1	0.135704	0.380257
1900	CBY3	0.406323	0.125933
1901	CC2D1A	-0.204975	0.340116
1902	CC2D1B	-0.118566	0.227891
1903	CC2D2A	0.297566	0.406751
1904	CC2D2B	0.598154	0.0823257
1905	CCAR1	0.104753	0.427673
1906	CCAR2	0.429098	0.327886
1907	CCBE1	0.396203	0.347505
1908	CCDC102A	0.241017	0.4395
1909	CCDC102B	0.105551	0.244005
1910	CCDC106	0.166503	0.4431
1911	CCDC107	0.218665	0.495911
1912	CCDC110	0.241507	0.450739
1913	CCDC112	0.143466	0.458165
1914	CCDC115	0.228397	0.290192
1915	CCDC116	0.313966	0.105258
1916	CCDC117	-0.171626	0.428839
1917	CCDC12	-0.306133	0.42286
1918	CCDC120	-0.108541	0.348148
1919	CCDC121	-0.0171293	0.352181
1920	CCDC122	-0.0556985	0.337499
1921	CCDC124	-0.312547	0.573455
1922	CCDC125	0.139127	0.462488
1923	CCDC126	0.042329	0.371681
1924	CCDC127	0.085599	0.179124
1925	CCDC13	-0.125968	0.0576715
1926	CCDC134	0.0629375	0.447385
1927	CCDC136	0.368804	0.489423
1928	CCDC137	-0.427718	0.408521
1929	CCDC138	0.173225	0.368068
1930	CCDC14	0.491716	0.461576
1931	CCDC141	0.427517	0.394201
1932	CCDC142	0.156854	0.3173
1933	CCDC144A	0.0353176	0.256481
1934	CCDC146	-0.0991182	0.426856
1935	CCDC148	0.036576	0.14179
1936	CCDC149	0.0279597	0.32214
1937	CCDC15	0.309187	0.337604
1938	CCDC150	0.344222	0.0764248
1939	CCDC152	0.0850685	0.194625
1940	CCDC154	-0.117231	0.769825
1941	CCDC157	0.143822	0.219097
1942	CCDC158	0.239514	0.146566
1943	CCDC159	-0.193098	0.610856
1944	CCDC163	-0.0933947	0.484627
1945	CCDC167	0.0818114	0.570365
1946	CCDC168	0.0876691	0.00752336
1947	CCDC17	-0.0634127	0.440668
1948	CCDC170	0.12763	0.359709
1949	CCDC171	0.0208349	0.138259
1950	CCDC174	0.0125296	0.203224
1951	CCDC18	0.525211	0.151919
1952	CCDC180	0.216626	0.121662
1953	CCDC181	0.230643	0.175476
1954	CCDC183	0.0435462	0.326744
1955	CCDC184	0.201685	0.332099
1956	CCDC186	-0.0662053	0.724895
1957	CCDC187	-0.167409	0.283317
1958	CCDC188	0.000170151	0.267166
1959	CCDC191	-0.0343507	0.314657
1960	CCDC192	0.0692404	0.105114
1961	CCDC194	0.0216025	0.242515
1962	CCDC196	-0.021804	0.0282621
1963	CCDC200	0.11409	0.133294
1964	CCDC22	0.0927326	0.336139
1965	CCDC24	0.0640751	0.525339
1966	CCDC25	0.261246	0.393627
1967	CCDC26	-0.261986	0.070039
1968	CCDC28A	0.068773	0.447525
1969	CCDC28B	-0.108003	0.374722
1970	CCDC3	0.340553	0.748401
1971	CCDC30	0.188483	0.122864
1972	CCDC32	0.0451508	0.22898
1973	CCDC34	0.307281	0.369849
1974	CCDC38	-0.150438	0.0225143
1975	CCDC39	0.0760376	0.0256392
1976	CCDC40	0.272446	0.384501
1977	CCDC43	0.106157	0.311994
1978	CCDC47	0.0478655	0.487872
1979	CCDC50	0.00833134	0.505178
1980	CCDC51	0.209659	0.344972
1981	CCDC57	-0.0089446	0.44854
1982	CCDC59	-0.227849	0.275836
1983	CCDC6	0.199561	0.648174
1984	CCDC61	0.00360013	0.395431
1985	CCDC62	0.0769262	0.0699857
1986	CCDC65	0.159018	0.332519
1987	CCDC66	0.0309862	0.292035
1988	CCDC68	0.230987	0.481952
1989	CCDC69	0.481963	0.694404
1990	CCDC7	0.0584911	0.156691
1991	CCDC71	-0.00703021	0.28899
1992	CCDC71L	0.167799	0.450069
1993	CCDC73	-0.157659	0.0438622
1994	CCDC74A	0.136625	0.819293
1995	CCDC74B	0.0515821	0.681988
1996	CCDC77	0.187085	0.29159
1997	CCDC78	0.215776	0.736964
1998	CCDC8	0.481559	0.670645
[truncated: 14,060 more rows]

## Sheet: ProGENIE(Prov-GigaPath)
	gene	pcc	rmse
0	A1BG	-0.020007	0.0444681
1	A2M	0.223393	0.966389
2	A2ML1	0.340272	0.348022
3	A4GALT	0.433581	0.555331
4	AAAS	-0.105937	0.253449
5	AACS	0.242599	0.347359
6	AADAT	0.048493	0.766711
7	AAGAB	0.0942815	0.28178
8	AAK1	0.124139	0.458187
9	AAMDC	0.137518	0.343525
10	AAMP	0.245203	0.277653
11	AANAT	0.1576	0.0447345
12	AAR2	-0.195684	0.23977
13	AARD	0.125201	0.276691
14	AARS1	0.137414	0.393255
15	AARS2	0.186471	0.245062
16	AARSD1	-0.162909	0.213383
17	AASDH	-0.0433186	0.352497
18	AASDHPPT	-0.0780709	0.357615
19	AASS	0.00767835	0.45253
20	AATBC	0.242376	0.371111
21	AATF	0.0596033	0.270815
22	AATK	0.000970368	0.435423
23	ABAT	0.434189	0.729522
24	ABCA1	-0.058675	0.66419
25	ABCA10	0.238294	0.149771
26	ABCA12	-0.0533231	0.18387
27	ABCA13	-0.0785912	0.0539487
28	ABCA2	0.271663	0.466609
29	ABCA3	0.0820821	0.4891
30	ABCA4	0.0458601	0.112857
31	ABCA5	0.0114999	0.354339
32	ABCA6	0.29402	0.182333
33	ABCA7	0.411545	0.394115
34	ABCA8	0.495635	0.492381
35	ABCA9	0.145771	0.19847
36	ABCB1	0.421265	0.542553
37	ABCB10	0.107596	0.397024
38	ABCB11	-0.137999	0.0894886
39	ABCB4	0.512305	0.103572
40	ABCB5	0.218576	0.214829
41	ABCB6	0.280931	0.120838
42	ABCB7	0.0766046	0.257129
43	ABCB8	0.025984	0.374722
44	ABCB9	0.432071	0.143413
45	ABCC1	-0.130307	0.472066
46	ABCC10	0.346115	0.295324
47	ABCC11	0.25717	0.991116
48	ABCC2	0.208236	0.0878974
49	ABCC3	0.621834	0.573251
50	ABCC4	0.395411	0.991499
51	ABCC5	0.360301	0.491344
52	ABCC6	0.398659	0.451359
53	ABCC8	-0.193971	0.472789
54	ABCC9	0.498427	0.485312
55	ABCD1	0.400415	0.334893
56	ABCD2	0.515139	0.100583
57	ABCD3	0.108433	0.399976
58	ABCD4	0.210272	0.258424
59	ABCE1	0.271005	0.409103
60	ABCF1	-0.0196114	0.292081
61	ABCF2	0.0117876	0.290101
62	ABCF3	0.185361	0.24677
63	ABCG1	0.0913194	0.536247
64	ABCG2	0.568217	0.472887
65	ABCG4	0.1857	0.0418096
66	ABCG5		0.0418096
67	ABCG8	0.028728	0.0186053
68	ABHD1	0.375017	0.384983
69	ABHD10	0.293745	0.374724
70	ABHD11	0.0569936	0.610933
71	ABHD12	-0.0621113	0.689725
72	ABHD12B	0.100917	0.0369125
73	ABHD13	0.0568711	0.357587
74	ABHD14A	0.0154115	0.598963
75	ABHD14B	0.326128	0.429157
76	ABHD15	0.312673	0.339281
77	ABHD16A	-0.0460287	0.162493
78	ABHD17A	0.0656007	0.390144
79	ABHD17B	0.319633	0.468662
80	ABHD17C	0.248571	0.554927
81	ABHD18	-0.0993543	0.302482
82	ABHD2	0.274545	0.941346
83	ABHD3	0.290666	0.428379
84	ABHD4	0.196799	0.407847
85	ABHD5	0.106929	0.271181
86	ABHD6	0.58587	0.286356
87	ABHD8	0.326698	0.40276
88	ABI1	-0.048385	0.377769
89	ABI2	0.0597522	0.299337
90	ABI3	0.42755	0.498923
91	ABI3BP	0.416755	0.536039
92	ABITRAM	0.113707	0.334755
93	ABL1	-0.0633471	0.431505
94	ABL2	0.00642497	0.287449
95	ABLIM1	0.3071	0.716382
96	ABLIM2	0.139557	0.318654
97	ABLIM3	-0.0159405	0.543864
98	ABO	0.652699	0.668694
99	ABR	0.452586	0.338634
100	ABRACL	0.0352016	0.677204
101	ABRAXAS1	0.0982002	0.259814
102	ABRAXAS2	0.0904053	0.306448
103	ABT1	0.276371	0.264907
104	ABTB1	0.411842	0.43904
105	ABTB2	0.0575519	0.585959
106	ACAA1	0.242596	0.392805
107	ACAA2	0.475168	0.526416
108	ACACA	0.402851	0.605127
109	ACACB	0.666521	0.399032
110	ACAD10	0.0171405	0.313167
111	ACAD11	0.0570542	0.0871825
112	ACAD8	0.151179	0.857652
113	ACAD9	0.154571	0.251082
114	ACADL	0.521398	0.90388
115	ACADM	0.0342731	0.564733
116	ACADS	0.362523	0.513757
117	ACADSB	0.153356	0.648636
118	ACADVL	0.115665	0.462701
119	ACAN	0.168924	0.372904
120	ACAP1	0.432575	0.426463
121	ACAP2	-0.00611715	0.463343
122	ACAP3	0.290618	0.457919
123	ACAT1	0.192876	0.492687
124	ACAT2	0.454291	0.58019
125	ACBD3	0.00796963	0.489007
126	ACBD4	0.334855	0.409915
127	ACBD5	0.138927	0.412206
128	ACBD6	0.175565	0.283121
129	ACBD7	0.209357	0.330674
130	ACCS	0.237021	0.525762
131	ACD	0.370415	0.338095
132	ACE	0.397097	0.523756
133	ACE2	-0.00301913	0.0896238
134	ACER2	0.0875739	0.749817
135	ACER3	-0.226261	0.799741
136	ACHE	0.344307	0.694917
137	ACIN1	0.0924188	0.308881
138	ACKR1	0.230563	1.07436
139	ACKR2	0.365087	0.291823
140	ACKR3	0.425083	0.688224
141	ACKR4	0.140795	0.0783835
142	ACLY	0.317162	0.602858
143	ACMSD	0.0442683	0.0529538
144	ACO1	0.302783	0.381488
145	ACO2	0.000961446	0.45299
146	ACOT1	0.0352898	0.509026
147	ACOT11	0.582189	0.29869
148	ACOT13	0.328652	0.293405
149	ACOT2	0.237253	0.446426
150	ACOT4	0.0203965	0.348804
151	ACOT7	0.13288	0.3337
152	ACOT8	0.223682	0.306296
153	ACOT9	0.390852	0.274281
154	ACOX1	0.326712	0.316829
155	ACOX2	0.557658	0.566901
156	ACOX3	0.267593	0.432689
157	ACOXL	0.24229	0.384978
158	ACP1	0.177086	0.274461
159	ACP2	0.413473	0.410332
160	ACP3	0.573139	1.28435
161	ACP4	0.0445473	0.305593
162	ACP5	0.355352	1.07501
163	ACP6	0.263285	0.33603
164	ACP7	0.403487	0.107586
165	ACR	0.0551013	0.105806
166	ACRBP	0.191362	0.306012
167	ACRV1	0.455488	0.27719
168	ACSBG1	0.0056071	0.233937
169	ACSBG2	0.0596971	0.0541297
170	ACSF2	0.610294	0.64563
171	ACSF3	0.195055	0.266091
172	ACSL1	0.229651	0.672995
173	ACSL3	0.277818	0.773432
174	ACSL4	0.587054	0.538729
175	ACSL5	0.114989	1.15827
176	ACSL6	0.182028	0.0689808
177	ACSM1	0.25786	1.75616
178	ACSM3	0.0566179	0.898995
179	ACSM4	0.0576692	0.0365954
180	ACSM5	0.230724	0.110807
181	ACSS1	0.267674	0.45245
182	ACSS2	0.645007	0.262184
183	ACSS3	0.667616	0.304076
184	ACTA1	0.242579	1.49621
185	ACTA2	0.681285	0.908004
186	ACTB	0.622799	0.353831
187	ACTC1	0.606084	1.17902
188	ACTG1	0.0254528	0.38708
189	ACTG2	0.661918	1.19004
190	ACTL6A	0.118525	0.43892
191	ACTN1	0.569941	0.589189
192	ACTN2	0.189735	0.886934
193	ACTN3	0.220137	0.0783008
194	ACTN4	0.582862	0.393767
195	ACTR10	0.0755992	0.256855
196	ACTR1A	0.0641608	0.304136
197	ACTR1B	-0.191136	0.275149
198	ACTR2	0.134346	0.462351
199	ACTR3	0.313191	0.370401
200	ACTR3B	0.190669	0.258178
201	ACTR3C	0.0406844	0.173302
202	ACTR5	0.165865	0.250489
203	ACTR6	0.0164122	0.302573
204	ACTR8	-0.101469	0.383476
205	ACTRT3	0.249404	0.2439
206	ACVR1	0.0870446	0.464459
207	ACVR1B	0.216941	0.478708
208	ACVR1C	0.100112	0.088932
209	ACVR2A	0.15439	0.371561
210	ACVR2B	0.130873	0.303203
211	ACVRL1	0.597936	0.420751
212	ACY1	0.207888	0.121727
213	ACY3	0.0922179	0.779767
214	ACYP1	0.171616	0.399922
215	ACYP2	0.131593	0.29278
216	ADA	0.411451	0.33505
217	ADA2	0.481776	0.619001
218	ADAD2	0.16335	0.120367
219	ADAM10	0.057799	0.572383
220	ADAM11	0.212783	0.268534
221	ADAM12	0.355956	0.224212
222	ADAM15	-0.0274513	0.39204
223	ADAM17	0.0111282	0.322691
224	ADAM19	0.630381	0.407505
225	ADAM20	0.179412	0.0561989
226	ADAM21	0.235616	0.331343
227	ADAM22	0.477245	0.519718
228	ADAM23	0.549261	0.229703
229	ADAM28	0.454028	0.455135
230	ADAM32	0.0973294	0.232843
231	ADAM33	0.706345	0.528861
232	ADAM8	0.347898	0.448739
233	ADAM9	-0.047212	0.836206
234	ADAMDEC1	0.392257	0.592776
235	ADAMTS1	0.477132	1.05014
236	ADAMTS10	0.575345	0.376407
237	ADAMTS12	0.303536	0.242146
238	ADAMTS13	0.162585	0.397646
239	ADAMTS14	0.255633	0.151435
240	ADAMTS15	0.558226	0.268064
241	ADAMTS16	0.142309	0.149608
242	ADAMTS17	0.0127753	0.166981
243	ADAMTS18	0.00929809	0.0945864
244	ADAMTS2	0.308142	0.626028
245	ADAMTS3	0.0682732	0.407474
246	ADAMTS4	0.208908	0.854557
247	ADAMTS5	0.559263	0.369315
248	ADAMTS6	0.0624573	0.231688
249	ADAMTS7	0.421334	0.184613
250	ADAMTS8	0.622649	0.425549
251	ADAMTS9	0.30005	0.546022
252	ADAMTSL1	0.0716224	1.0534
253	ADAMTSL2	0.489924	0.50993
254	ADAMTSL3	0.40731	0.60963
255	ADAMTSL4	0.548572	0.350326
256	ADAMTSL5	0.188619	0.318108
257	ADAP1	0.22025	0.327826
258	ADAP2	0.365654	0.343259
259	ADAR	0.0339687	0.476834
260	ADARB1	0.182409	0.366441
261	ADARB2	0.217772	0.608162
262	ADAT1	-0.0447505	0.445578
263	ADAT2	-0.0496279	0.347609
264	ADAT3	0.0513102	0.35956
265	ADCK1	-0.0273188	0.297292
266	ADCK2	0.117415	0.327491
267	ADCK5	0.302995	0.489454
268	ADCY1	-0.073237	0.767548
269	ADCY10	0.152215	0.136561
270	ADCY2	0.454079	0.497806
271	ADCY3	0.506307	0.524335
272	ADCY4	0.463854	0.380629
273	ADCY5	0.633759	0.590223
274	ADCY6	0.218016	0.553827
275	ADCY7	0.395855	0.310269
276	ADCY9	0.326797	0.390197
277	ADCYAP1	0.306307	0.255757
278	ADCYAP1R1	0.515203	0.221459
279	ADD1	0.566987	0.206283
280	ADD2	0.220447	0.445092
281	ADD3	0.252554	0.826015
282	ADGRA2	0.608196	0.855128
283	ADGRA3	-0.199399	0.371363
284	ADGRB1	0.263993	0.385077
285	ADGRB2	0.211004	0.347399
286	ADGRB3	0.509496	0.151923
287	ADGRD1	0.26667	0.375624
288	ADGRE1	0.361247	0.117726
289	ADGRE2	0.325758	0.267069
290	ADGRE3	0.425071	0.130049
291	ADGRE5	0.224885	0.631762
292	ADGRF1	-0.050239	1.22112
293	ADGRF3	-0.162898	0.0791767
294	ADGRF5	0.178051	1.38391
295	ADGRG1	0.0723547	0.524507
296	ADGRG2	0.486685	0.439326
297	ADGRG3	0.126386	0.129834
298	ADGRG5	0.501411	0.230592
299	ADGRG6	0.454902	0.623791
300	ADGRL1	0.255241	0.575605
301	ADGRL2	0.497075	0.579268
302	ADGRL3	0.512466	0.170907
303	ADGRL4	0.294867	0.519469
304	ADGRV1	0.0184062	0.327111
305	ADH1B	0.2945	0.415244
306	ADH1C	0.405211	0.772819
307	ADH5	0.581281	0.452991
308	ADH6	-0.21122	0.234386
309	ADHFE1	0.214527	0.531263
310	ADI1	0.390527	0.356965
311	ADIPOR1	-0.0182094	0.373732
312	ADIPOR2	0.238247	0.313725
313	ADK	0.0374417	0.346052
314	ADM	0.167797	0.933879
315	ADM2	0.369806	0.650488
316	ADM5	0.104605	0.331295
317	ADNP	0.0512779	0.480575
318	ADNP2	-0.0111002	0.416068
319	ADO	-0.00361603	0.286341
320	ADORA1	0.348196	0.157865
321	ADORA2A	0.102803	0.0734837
322	ADORA2B	0.45158	0.364786
323	ADORA3	0.27675	0.390453
324	ADPGK	0.282146	0.496634
325	ADPRH	0.0634472	0.547194
326	ADPRHL1	-0.183557	0.500947
327	ADPRM	0.0689276	0.625957
328	ADPRS	0.062402	0.305608
329	ADRA1A	0.521707	0.396899
330	ADRA1B	0.309237	0.100729
331	ADRA1D	0.563274	0.501672
332	ADRA2A	-0.0283545	0.961269
333	ADRA2B	0.333656	0.2036
334	ADRA2C	0.541664	0.757065
335	ADRB1	0.471167	0.665052
336	ADRB2	0.152507	0.678014
337	ADRM1	0.0135966	0.31955
338	ADSL	0.415947	0.145078
339	ADSS1	0.156722	0.349638
340	ADSS2	0.0905694	0.498142
341	ADTRP	0.156744	0.380447
342	AEBP1	0.451605	0.861155
343	AEBP2	0.189608	0.380256
344	AEN	-0.100467	0.489041
345	AFAP1	0.088791	0.27969
346	AFAP1L1	0.542121	0.314175
347	AFAP1L2	0.542176	0.58546
348	AFDN	0.172143	0.582308
349	AFF1	-0.00986216	0.547597
350	AFF2	0.256475	0.152683
351	AFF3	0.422722	0.977725
352	AFF4	0.0728928	0.532127
353	AFG1L	0.0386575	0.21063
354	AFG3L2	-0.141009	0.465799
355	AFMID	0.459125	0.512542
356	AFTPH	0.247686	0.373978
357	AGA	0.252698	0.43952
358	AGAP1	0.16317	0.463194
359	AGAP2	0.324294	0.233778
360	AGAP3	0.162968	0.341283
361	AGAP4	0.148706	0.283577
362	AGAP5	0.0883776	0.0774632
363	AGAP6	0.148821	0.134102
364	AGAP9	0.0317691	0.444786
365	AGBL2	0.317764	0.182542
366	AGBL3	0.239075	0.199566
367	AGBL4	0.33474	0.105883
368	AGBL5	0.000584768	0.267323
369	AGER	0.177668	0.547937
370	AGFG1	-0.00790004	0.387466
371	AGFG2	0.107362	0.516787
372	AGGF1	0.0518133	0.270444
373	AGK	0.298446	0.269482
374	AGL	0.269441	0.438607
375	AGMAT	0.317303	0.552646
376	AGMO	-0.207187	0.256758
377	AGO1	-0.111073	0.276689
378	AGO2	0.128556	0.474604
379	AGO3	-0.0168425	0.273805
380	AGO4	0.349308	0.384709
381	AGPAT1	0.39161	0.315473
382	AGPAT2	-0.195147	0.602548
383	AGPAT3	0.277476	0.308953
384	AGPAT4	0.576175	0.198361
385	AGPAT5	-0.166368	0.566873
386	AGPS	0.270956	0.442422
387	AGR2	-0.190766	1.53055
388	AGRN	0.300285	0.601954
389	AGRP	0.0870349	0.118409
390	AGT	-0.0438697	1.55003
391	AGTPBP1	0.250144	0.399509
392	AGTR1	-0.0103292	1.36849
393	AGTRAP	0.179328	0.541775
394	AHCTF1	-0.121266	0.398323
395	AHCY	0.337534	0.355984
396	AHCYL1	-0.294352	0.423278
397	AHCYL2	-0.0843521	0.495314
398	AHDC1	0.625447	0.355781
399	AHI1	-0.0740955	0.325578
400	AHNAK	0.480949	0.670632
401	AHNAK2	0.584671	0.551142
402	AHR	0.501693	0.578693
403	AHRR	0.220018	0.0823092
404	AHSA1	0.109896	0.34562
405	AIDA	0.397339	0.630135
406	AIF1	0.413964	0.700066
407	AIF1L	0.205881	0.477867
408	AIFM1	0.4069	0.27558
409	AIFM2	0.61102	0.366869
410	AIFM3	0.108719	0.179455
411	AIG1	0.139672	0.250939
412	AIM2	0.446883	0.31826
413	AIMP1	0.0732409	0.233077
414	AIMP2	0.489203	0.377357
415	AIP	-0.0493059	0.445186
416	AIRE	0.273715	0.0577915
417	AJAP1	0.49797	0.194029
418	AJM1	0.412849	0.488629
419	AJUBA	0.6136	0.521256
420	AK1	0.274391	0.308109
421	AK2	0.00637114	0.273029
422	AK3	0.140897	0.390404
423	AK4	0.338358	0.548057
424	AK5	0.386298	0.92867
425	AK6	-0.224954	0.384386
426	AK7	0.158238	0.278963
427	AK8	-0.00565411	0.303495
428	AK9	0.0554207	0.252935
429	AKAP1	0.279562	0.414538
430	AKAP10	0.0441504	0.339372
431	AKAP11	-0.0701657	0.627343
432	AKAP12	0.498685	0.732038
433	AKAP13	0.0535094	0.590901
434	AKAP17A	0.178903	0.403706
435	AKAP3	0.280323	0.294546
436	AKAP5	0.386505	0.275355
437	AKAP6	0.58337	0.188211
438	AKAP7	0.526098	0.533995
439	AKAP8	0.17006	0.248379
440	AKAP8L	0.28928	0.341404
441	AKAP9	0.254737	0.518003
442	AKIP1	0.461506	0.235888
443	AKIRIN1	0.0860752	0.525363
444	AKIRIN2	0.186547	0.354989
445	AKNA	0.493588	0.4423
446	AKR1A1	0.280966	0.327135
447	AKR1B1	0.605806	0.547363
448	AKR1B10	-0.00422102	0.209123
449	AKR1B15	0.180103	0.0658684
450	AKR1C1	0.281462	0.46838
451	AKR1C2	0.335584	0.338405
452	AKR1C3	0.174213	0.700375
453	AKR1E2	-0.0344053	0.377731
454	AKR7A2	0.126347	0.348749
455	AKR7A3	0.122703	0.436713
456	AKT1	0.195996	0.384584
457	AKT1S1	0.238715	0.309841
458	AKT2	0.111503	0.241294
459	AKT3	0.0966373	0.528894
460	AKTIP	0.20146	0.286454
461	ALAD	0.541844	0.509796
462	ALAS1	0.219118	0.361682
463	ALAS2	0.0306566	0.0812891
464	ALB	0.115981	1.04554
465	ALCAM	0.302096	0.601673
466	ALDH16A1	0.132542	0.455314
467	ALDH18A1	0.140492	0.424932
468	ALDH1A1	0.224377	1.30959
469	ALDH1A2	0.67574	0.649829
470	ALDH1A3	0.396934	0.783328
471	ALDH1B1	0.434946	0.451394
472	ALDH1L1	0.0559815	0.742386
473	ALDH1L2	0.470626	0.289455
474	ALDH2	0.506483	0.747702
475	ALDH3A1	0.363991	0.271521
476	ALDH3A2	0.539959	0.457191
477	ALDH3B1	0.597137	0.331922
478	ALDH4A1	0.334866	0.620607
479	ALDH5A1	0.205871	0.3955
480	ALDH6A1	0.373057	0.583249
481	ALDH7A1	0.183158	0.51247
482	ALDH8A1	0.212721	0.154979
483	ALDH9A1	0.238286	0.486081
484	ALDOA	0.0215933	0.453747
485	ALDOB	-0.165367	0.132206
486	ALDOC	0.400947	0.541859
487	ALG1	0.04413	0.299549
488	ALG10	0.0451704	0.275818
489	ALG10B	-0.0652429	0.36148
490	ALG11	0.14752	0.30888
491	ALG12	0.0363016	0.345354
492	ALG13	0.277091	0.260887
493	ALG14	0.311156	0.221929
494	ALG1L2	0.266159	0.135588
495	ALG2	0.431909	0.352546
496	ALG3	0.251709	0.354458
497	ALG5	0.209022	0.411824
498	ALG6	0.251576	0.340465
499	ALG8	0.424053	0.296196
500	ALG9	0.0845557	0.172272
501	ALK	-0.0447851	0.0528108
502	ALKAL2	0.2	0.260429
503	ALKBH1	0.151395	0.218265
504	ALKBH2	0.294514	0.439407
505	ALKBH3	0.144875	0.305591
506	ALKBH4	0.0876512	0.324023
507	ALKBH5	0.158557	0.268207
508	ALKBH6	0.0615521	0.188004
509	ALKBH7	0.211436	0.586099
510	ALKBH8	0.268147	0.264854
511	ALMS1	-0.225751	0.416811
512	ALOX12	0.198428	0.105469
513	ALOX15	0.238956	1.08449
514	ALOX15B	0.359876	2.37562
515	ALOX5	0.0375213	0.69922
516	ALOX5AP	0.451075	0.613635
517	ALPK1	0.551386	0.316025
518	ALPK2	0.079027	0.0913086
519	ALPK3	-0.166716	0.458465
520	ALPL	0.25107	0.828903
521	ALS2	0.0813566	0.314704
522	ALS2CL	0.588646	0.456227
523	ALX4	0.32109	0.350446
524	ALYREF	0.0767825	0.370607
525	AMACR	0.254809	1.26734
526	AMBP	0.0444544	0.324295
527	AMBRA1	0.144252	0.294548
528	AMD1	0.142712	0.844968
529	AMDHD1	0.103222	0.12444
530	AMDHD2	0.273441	0.372259
531	AMER1	-0.0874572	0.30258
532	AMFR	0.355051	0.298952
533	AMH	0.277332	0.685835
534	AMHR2	0.065418	0.137122
535	AMIGO1	0.278142	0.363485
536	AMIGO2	0.438463	0.645812
537	AMMECR1	0.11309	0.495726
538	AMMECR1L	0.081307	0.340711
539	AMN	0.341391	0.20116
540	AMN1	-0.233053	0.284677
541	AMOT	0.523231	0.678215
542	AMOTL1	-0.109491	0.820275
543	AMOTL2	0.479927	0.632214
544	AMPD2	0.191682	0.295313
545	AMPD3	0.0464209	0.874136
546	AMPH	0.458259	0.188289
547	AMT	-0.355975	0.0787077
548	AMY2B	0.409228	0.399031
549	AMZ1	0.0982132	0.0558536
550	AMZ2	0.0495129	0.232404
551	ANAPC1	0.251922	0.31141
552	ANAPC10	0.200166	0.13542
553	ANAPC11	0.102559	0.473572
554	ANAPC13	0.206331	0.332457
555	ANAPC15	0.0254268	0.363368
556	ANAPC16	0.50995	0.258878
557	ANAPC2	0.175707	0.341391
558	ANAPC4	0.532642	0.269349
559	ANAPC5	0.354195	0.284421
560	ANAPC7	-0.0267438	0.281393
561	ANG	0.536852	0.80558
562	ANGEL1	-0.0481594	0.341937
563	ANGEL2	0.153917	0.333341
564	ANGPT1	0.611713	0.625814
565	ANGPT2	0.231819	0.516451
566	ANGPT4	0.256088	0.0983691
567	ANGPTL1	0.533103	0.53325
568	ANGPTL2	0.525194	0.718949
569	ANGPTL3	0.0961597	0.674657
570	ANGPTL4	0.397541	1.07566
571	ANGPTL6	0.310479	0.0987564
572	ANGPTL8	0.239647	0.126729
573	ANK1	0.184475	0.436392
574	ANK2	0.607103	0.284048
575	ANK3	0.240349	0.675906
576	ANKAR	0.137538	0.182932
577	ANKDD1A	0.546414	0.290861
578	ANKDD1B	0.334382	0.230733
579	ANKEF1	0.266682	0.312011
580	ANKFN1	0.310713	0.0955589
581	ANKFY1	0.250644	0.432565
582	ANKH	0.23063	0.682472
583	ANKHD1	0.110936	0.102073
584	ANKIB1	0.0428849	0.498701
585	ANKK1	-0.157885	0.391219
586	ANKLE1	0.21599	0.151125
587	ANKLE2	0.105571	0.223635
588	ANKMY1	0.327959	0.225068
589	ANKMY2	0.404858	0.29441
590	ANKRA2	-0.0439062	0.48933
591	ANKRD1	0.0902221	0.845588
592	ANKRD10	0.0647229	0.543496
593	ANKRD11	-0.207426	0.421128
594	ANKRD12	0.0990519	0.414321
595	ANKRD13A	0.40929	0.381814
596	ANKRD13B	0.466976	0.463272
597	ANKRD13C	0.114583	0.308223
598	ANKRD13D	0.240149	0.417737
599	ANKRD16	0.28545	0.348012
600	ANKRD17	0.0195857	0.543142
601	ANKRD18A	0.129626	0.253706
602	ANKRD18B	0.0108686	0.322591
603	ANKRD2	0.0895221	0.369568
604	ANKRD22	-0.0316639	0.715593
605	ANKRD23	0.147304	0.220433
606	ANKRD24	-0.0964638	0.510825
607	ANKRD26	-0.137377	0.247515
608	ANKRD27	0.119799	0.316503
609	ANKRD28	0.216225	0.325333
610	ANKRD29	0.279467	0.801889
611	ANKRD31	0.130463	0.0655733
612	ANKRD33B	0.537534	0.262827
613	ANKRD34A	-0.0183696	0.347362
614	ANKRD35	0.687701	0.461354
615	ANKRD36	-0.0185493	0.174027
616	ANKRD36B	-0.101401	0.20181
617	ANKRD36C	0.253337	0.16311
618	ANKRD37	0.345338	0.789353
619	ANKRD39	0.191566	0.211593
620	ANKRD40	0.0759505	0.424381
621	ANKRD42	0.213219	0.242755
622	ANKRD44	0.360132	0.31596
623	ANKRD45	0.158708	0.0863169
624	ANKRD46	0.0714434	0.362331
625	ANKRD49	-0.0311826	0.306796
626	ANKRD50	0.186511	0.646611
627	ANKRD52	-0.0284108	0.489143
628	ANKRD53	0.421168	0.207212
629	ANKRD54	-0.107739	0.348697
630	ANKRD55	0.475545	0.0748286
631	ANKRD6	0.13727	0.38782
632	ANKRD61	0.0370106	0.214125
633	ANKRD65	0.637002	0.564765
634	ANKRD9	0.12819	0.417331
635	ANKS1A	-0.0690545	0.366867
636	ANKS1B	-0.118269	0.17355
637	ANKS3	0.304857	0.435398
638	ANKS6	0.119623	0.463013
639	ANKZF1	0.270354	0.429945
640	ANLN	0.56382	0.471517
641	ANO1	0.540064	0.633109
642	ANO10	-0.114184	0.274415
643	ANO2	0.138267	0.156126
644	ANO3	0.15883	0.177902
645	ANO4	0.615881	0.466106
646	ANO5	0.567321	0.445966
647	ANO6	0.520593	0.624321
648	ANO7	0.546891	1.13931
649	ANO8	0.192355	0.417365
650	ANO9	0.335176	0.571573
651	ANOS1	0.333652	0.606579
652	ANP32A	-0.00359954	0.292377
653	ANP32B	0.258877	0.337606
654	ANP32E	0.646859	0.501149
655	ANPEP	0.405136	2.32729
656	ANTKMT	0.0144089	0.62646
657	ANTXR1	0.550476	0.771888
658	ANTXR2	0.515479	0.733893
659	ANXA1	0.520446	0.887346
660	ANXA10	-0.0711108	0.195683
661	ANXA11	0.475836	0.368179
662	ANXA13	-0.0199116	0.202192
663	ANXA2	0.529206	0.711648
664	ANXA2R	0.0956003	0.600227
665	ANXA3	0.291719	0.731094
666	ANXA4	0.581716	0.309021
667	ANXA5	-0.20772	0.50872
668	ANXA6	0.712553	0.573616
669	ANXA7	-0.0659642	0.340311
670	ANXA8	0.47729	0.340961
671	ANXA9	-0.0744852	0.582592
672	AOAH	0.417616	0.509937
673	AOC1	0.449697	1.63194
674	AOC2	0.0281468	0.341746
675	AOC3	0.657875	0.766779
676	AOPEP	0.637008	0.375542
677	AOX1	0.63112	0.828312
678	AP1AR	0.280366	0.362622
679	AP1B1	0.147967	0.44802
680	AP1G1	0.225389	0.50171
681	AP1G2	0.221566	0.460334
682	AP1M1	0.455945	0.201757
683	AP1M2	0.363723	0.374721
684	AP1S1	0.052316	0.42912
685	AP1S2	0.269857	0.361121
686	AP1S3	0.212935	0.395447
687	AP2A1	0.199199	0.297287
688	AP2A2	0.0180534	0.232399
689	AP2B1	0.0208596	0.385355
690	AP2M1	0.0532235	0.252993
691	AP2S1	-0.126838	0.693326
692	AP3B1	0.344014	0.403957
693	AP3B2	0.34917	0.226994
694	AP3D1	0.142925	0.341435
695	AP3M1	0.128916	0.480983
696	AP3M2	0.14252	0.384026
697	AP3S1	-0.254727	0.352249
698	AP3S2	0.0381701	0.247501
699	AP4B1	0.297167	0.233487
700	AP4E1	0.135863	0.292174
701	AP4M1	0.425004	0.301406
702	AP4S1	0.626501	0.135273
703	AP5B1	0.357589	0.33602
704	AP5M1	0.161596	0.268793
705	AP5S1	-0.0139018	0.238546
706	AP5Z1	0.0758617	0.351255
707	APAF1	-0.138584	0.49521
708	APBA1	-0.02362	0.339196
709	APBA2	0.507793	0.509736
710	APBA3	0.220947	0.261268
711	APBB1	0.587946	0.469394
712	APBB1IP	0.459327	0.48925
713	APBB2	0.352181	0.301579
714	APBB3	0.24474	0.436529
715	APC	-0.0755134	0.523394
716	APC2	0.180115	0.150043
717	APCDD1	0.542702	0.741518
718	APCDD1L	0.308182	0.113545
719	APEH	0.200368	0.357634
720	APEX1	0.249814	0.387009
721	APEX2	-0.073616	0.257413
722	APH1A	-0.0404831	0.290405
723	APH1B	0.148051	0.487892
724	API5	0.0884968	0.328166
725	APIP	0.110852	0.349543
726	APLF	0.581646	0.215731
727	APLN	0.479166	0.705581
728	APLNR	0.116559	0.628798
729	APLP1	0.215763	0.534827
730	APLP2	0.338146	0.467502
731	APMAP	0.15455	0.395227
732	APOA1	-0.00642728	0.308005
733	APOB	0.20507	0.100989
734	APOBEC2	0.0830002	0.370176
735	APOBEC3A	0.108463	0.185489
736	APOBEC3B	0.235557	0.303779
737	APOBEC3C	0.626496	0.848226
738	APOBEC3D	0.514133	0.0864674
739	APOBEC3F	0.387379	0.473403
740	APOBEC3G	0.513861	0.501223
741	APOBEC3H	0.202795	0.266871
742	APOBR	0.344484	0.451043
743	APOC1	0.131634	1.14342
744	APOD	0.0631009	1.24437
745	APOE	0.150044	1.20042
746	APOF	0.231559	1.04263
747	APOL1	0.486488	0.825901
748	APOL2	0.0234669	0.434011
749	APOL3	0.30821	0.641884
750	APOL4	0.0733031	1.34879
751	APOL6	0.407499	0.713336
752	APOLD1	0.0615613	0.81324
753	APOM	0.285189	0.317182
754	APOO	0.188939	0.376619
755	APOOL	0.0903849	0.512592
756	APP	-0.0398398	0.807804
757	APPBP2	0.154015	0.406658
758	APPL1	0.067958	0.431396
759	APPL2	0.0583438	0.506385
760	APRT	0.139326	0.664678
761	APTR	0.303585	0.306728
762	APTX	0.295791	0.185628
763	AQP1	0.329034	0.750512
764	AQP11	0.321557	0.727613
765	AQP3	0.5214	0.892486
766	AQP5	0.268629	0.372238
767	AQP6	-0.16052	0.122326
768	AQP7	0.259639	0.157138
769	AQP8	0.021192	0.184541
770	AQP9	0.192077	0.292812
771	AQR	0.115776	0.376927
772	AR	0.247624	0.5396
773	ARAF	0.345927	0.300082
774	ARAP1	0.535196	0.420154
775	ARAP2	0.0504702	0.398259
776	ARAP3	0.277689	0.478844
777	ARC	-0.0668947	0.449357
778	ARCN1	0.37056	0.370763
779	AREG	0.0660733	0.953758
780	AREL1	0.247842	0.33435
781	ARF1	0.0700441	0.312514
782	ARF3	0.0363124	0.292203
783	ARF4	0.149944	0.421297
784	ARF5	0.0675512	0.404526
785	ARF6	0.118233	0.429313
786	ARFGAP1	0.205687	0.400346
787	ARFGAP2	0.244334	0.243495
788	ARFGAP3	0.274011	0.50951
789	ARFGEF1	0.183169	0.37164
790	ARFGEF2	0.0963442	0.612542
791	ARFGEF3	0.24205	0.864312
792	ARFIP1	0.0733747	0.398142
793	ARFIP2	0.36443	0.382885
794	ARFRP1	0.186798	0.394493
795	ARG1	-0.139331	0.266601
796	ARG2	0.500007	1.13162
797	ARGLU1	-0.126471	0.625113
798	ARHGAP1	0.266672	0.39091
799	ARHGAP10	0.615909	0.388879
800	ARHGAP11A	0.566432	0.291721
801	ARHGAP11B	0.129637	0.0771347
802	ARHGAP12	-0.177256	0.576919
803	ARHGAP15	0.551455	0.325392
804	ARHGAP17	0.258659	0.249746
805	ARHGAP18	0.200797	0.590631
806	ARHGAP19	-0.0665803	0.291596
807	ARHGAP20	0.590575	0.379802
808	ARHGAP21	-0.0568811	0.440801
809	ARHGAP22	0.472644	0.238891
810	ARHGAP23	0.652102	0.579074
811	ARHGAP24	0.507953	0.241006
812	ARHGAP25	0.492116	0.411012
813	ARHGAP26	0.0738713	0.453703
814	ARHGAP27	0.402414	0.39351
815	ARHGAP28	0.148292	0.66861
816	ARHGAP29	-0.199448	0.643039
817	ARHGAP30	0.429566	0.55486
818	ARHGAP31	0.484539	0.410498
819	ARHGAP32	0.24259	0.549356
820	ARHGAP33	0.363797	0.465601
821	ARHGAP35	0.1122	0.439397
822	ARHGAP39	0.374507	0.412998
823	ARHGAP4	0.505801	0.502851
824	ARHGAP40	0.456845	0.55993
825	ARHGAP42	0.128246	0.358023
826	ARHGAP44	0.100745	0.313764
827	ARHGAP45	0.466824	0.524292
828	ARHGAP5	0.0860732	0.683399
829	ARHGAP6	0.0504848	0.579311
830	ARHGAP8	0.0789506	0.278636
831	ARHGAP9	0.455608	0.438429
832	ARHGDIA	0.0579165	0.390838
833	ARHGDIB	0.291461	0.894933
834	ARHGDIG	0.46027	0.764263
835	ARHGEF1	0.581048	0.339769
836	ARHGEF10	-0.127014	0.102845
837	ARHGEF10L	0.539985	0.329727
838	ARHGEF11	-0.024129	0.496489
839	ARHGEF12	0.399667	0.478438
840	ARHGEF15	0.449371	0.392231
841	ARHGEF16	0.182051	0.416863
842	ARHGEF17	0.484073	0.510458
843	ARHGEF18	0.171112	0.21904
844	ARHGEF19	0.436871	0.619215
845	ARHGEF2	0.569462	0.393262
846	ARHGEF25	0.662868	0.417739
847	ARHGEF26	0.406423	0.686159
848	ARHGEF28	0.530979	0.379684
849	ARHGEF3	0.332512	0.563019
850	ARHGEF33	-0.00733185	0.112969
851	ARHGEF35	0.136885	0.523647
852	ARHGEF37	0.422834	0.528952
853	ARHGEF38	0.259981	0.621118
854	ARHGEF39	0.346684	0.22207
855	ARHGEF4	0.120895	0.376843
856	ARHGEF40	0.515743	0.448946
857	ARHGEF5	0.101469	0.293407
858	ARHGEF6	0.45212	0.476256
859	ARHGEF7	0.431433	0.421611
860	ARHGEF9	0.34066	0.260281
861	ARID1A	-0.0116252	0.513861
862	ARID1B	-0.0895925	0.364941
863	ARID2	-0.151683	0.39851
864	ARID3A	0.0110796	0.358498
865	ARID3B	-0.204234	0.270045
866	ARID3C	-0.126391	0.1775
867	ARID4A	0.0846172	0.41021
868	ARID4B	0.0797947	0.365362
869	ARID5A	0.323801	0.774827
870	ARID5B	0.152859	0.584984
871	ARIH1	-0.157599	0.319297
872	ARIH2	0.00469398	0.338302
873	ARL1	0.295214	0.334875
874	ARL10	0.522749	0.232037
875	ARL11	0.411682	0.166065
876	ARL13A	0.113222	0.0739792
877	ARL13B	0.0675022	0.412925
878	ARL14EP	0.063096	0.248077
879	ARL15	-0.10874	0.487002
880	ARL16	0.187702	0.473342
881	ARL17A	-0.135862	0.125669
882	ARL17B	-0.195267	0.14803
883	ARL2	0.0697194	0.596645
884	ARL2BP	0.461341	0.162341
885	ARL3	0.166329	0.333684
886	ARL4A	0.337507	0.522866
887	ARL4C	0.619774	0.597093
888	ARL4D	0.644228	0.66869
889	ARL5A	0.0156314	0.412211
890	ARL5B	-0.000981865	0.523527
891	ARL6	0.0850754	0.32885
892	ARL6IP1	0.274935	0.418653
893	ARL6IP4	-0.259337	0.169303
894	ARL6IP5	0.402399	0.445163
895	ARL6IP6	0.0692863	0.377656
896	ARL8A	-0.236365	0.278073
897	ARL8B	0.225136	0.315242
898	ARL9	0.0921412	0.31737
899	ARMC1	-0.00833971	0.387146
900	ARMC10	0.15683	0.262836
901	ARMC12	0.0809118	0.385419
902	ARMC2	0.0843349	0.210547
903	ARMC5	0.050677	0.395983
904	ARMC6	0.44317	0.315765
905	ARMC7	-0.0841098	0.362861
906	ARMC8	0.182836	0.277057
907	ARMC9	0.0714856	0.222142
908	ARMCX1	0.568974	0.93458
909	ARMCX2	0.263876	0.806833
910	ARMCX3	0.240743	0.367528
911	ARMCX4	0.531787	0.411181
912	ARMCX5	0.0609719	0.30893
913	ARMCX6	0.0617192	0.339528
914	ARMH1	0.0971826	0.401644
915	ARMH3	0.102926	0.274085
916	ARMH4	0.53817	0.220303
917	ARMT1	0.127524	0.381777
918	ARNT	0.0685239	0.381878
919	ARNT2	-0.109756	0.574153
920	ARPC1A	-0.110343	0.489224
921	ARPC1B	0.296828	0.12633
922	ARPC2	0.361522	0.327353
923	ARPC3	0.105131	0.363546
924	ARPC4	-0.0138433	0.442495
925	ARPC5	0.164268	0.286656
926	ARPC5L	0.121336	0.364775
927	ARPIN	0.167037	0.366547
928	ARPP19	0.157089	0.346407
929	ARR3	-0.0948464	0.159285
930	ARRB1	0.584769	0.355325
931	ARRB2	0.357354	0.403388
932	ARRDC1	-0.00354018	0.461463
933	ARRDC2	0.389112	0.60514
934	ARRDC3	0.375051	0.78107
935	ARRDC4	0.0467611	0.502693
936	ARRDC5	0.504955	0.150499
937	ARSA	0.205305	0.507379
938	ARSB	0.0604055	0.37718
939	ARSD	0.117835	0.505725
940	ARSG	0.17049	0.371053
941	ARSI	0.486963	0.254208
942	ARSJ	0.539263	0.509007
943	ARSK	0.0918767	0.38453
944	ARSL	0.230373	0.220129
945	ART3	0.0716656	0.309535
946	ART4	0.183943	0.494376
947	ART5	0.224313	0.325646
948	ARTN	0.22839	0.369126
949	ARV1	0.266119	0.306595
950	ARVCF	0.437004	0.39837
951	ASAH1	0.237335	0.531732
952	ASAH2	0.0954637	0.109289
953	ASAH2B	0.0763576	0.230919
954	ASAP1	0.262933	0.506932
955	ASAP2	-0.00527142	0.611247
956	ASAP3	0.186244	0.522382
957	ASB1	0.557619	0.319176
958	ASB12	0.230453	0.171265
959	ASB13	-0.00180808	0.426739
960	ASB14	-0.00520856	0.109607
961	ASB16	-0.019596	0.272457
962	ASB2	0.669465	0.616629
963	ASB3	0.137508	0.378975
964	ASB4	0.122042	0.0730908
965	ASB6	0.206341	0.206791
966	ASB7	-0.023559	0.290727
967	ASB8	-0.0331041	0.256305
968	ASB9	-0.0500975	0.686677
969	ASCC1	-0.0903604	0.356674
970	ASCC2	0.0979107	0.250957
971	ASCC3	0.283028	0.501181
972	ASCL2	0.325792	0.75557
973	ASCL5	0.097259	0.122698
974	ASF1A	0.0466866	0.401145
975	ASF1B	0.575956	0.606685
976	ASGR1	0.265152	0.182028
977	ASGR2	0.296346	0.146685
978	ASH1L	0.0296242	0.546985
979	ASH2L	0.246129	0.349307
980	ASIC1	0.0447418	0.420312
981	ASIC2	0.465511	0.352743
982	ASIC3	0.132838	0.539466
983	ASIC4	0.0339466	0.0804886
984	ASIP	0.269449	0.145284
985	ASL	0.0731036	0.334689
986	ASMT	0.22473	0.0669324
987	ASMTL	0.488559	0.2875
988	ASNS	0.320722	0.115953
989	ASNSD1	-0.204688	0.225286
990	ASPA	0.63905	0.270377
991	ASPDH	0.0578674	0.150006
992	ASPG	0.0870807	0.130148
993	ASPH	0.286739	0.542629
994	ASPHD1	0.310969	0.571891
995	ASPHD2	0.22765	0.359397
996	ASPM	0.577155	0.300683
997	ASPN	0.110978	0.971402
998	ASPRV1	0.388924	0.224048
999	ASPSCR1	0.171073	0.401651
1000	ASRGL1	0.249115	0.781155
1001	ASS1	-0.0197784	0.943471
1002	ASTE1	0.176885	0.227913
1003	ASTN1	0.212879	0.185569
1004	ASTN2	0.335416	0.714771
1005	ASXL1	0.210833	0.35433
1006	ASXL2	0.0694576	0.514675
1007	ASXL3	0.619827	0.142108
1008	ATAD1	0.345242	0.673061
1009	ATAD2	0.0863882	0.576198
1010	ATAD2B	0.078917	0.333557
1011	ATAD3A	0.373404	0.41882
1012	ATAD3B	0.149135	0.534073
1013	ATAD3C	0.324694	0.453975
1014	ATAD5	0.41972	0.183086
1015	ATAT1	0.395293	0.388874
1016	ATE1	0.0570052	0.503153
1017	ATF1	-0.0714256	0.456755
1018	ATF2	-0.0687092	0.417551
1019	ATF3	0.280834	1.56644
1020	ATF4	0.0882808	0.373101
1021	ATF5	0.190507	0.568795
1022	ATF6	0.254893	0.425503
1023	ATF6B	0.0360369	0.350232
1024	ATF7	0.0576412	0.324584
1025	ATF7IP	0.0992968	0.52609
1026	ATF7IP2	-0.025626	0.500419
1027	ATG10	0.0452575	0.235561
1028	ATG101	-0.031994	0.387713
1029	ATG12	-0.232307	0.271488
1030	ATG13	-0.0605123	0.284984
1031	ATG14	0.254994	0.280904
1032	ATG16L1	-0.0854923	0.327009
1033	ATG16L2	0.433906	0.440464
1034	ATG2A	-0.0575495	0.309024
1035	ATG2B	0.146289	0.390573
1036	ATG3	0.0116397	0.260518
1037	ATG4A	0.356871	0.336374
1038	ATG4B	0.0881877	0.329985
1039	ATG4C	0.0920172	0.316221
1040	ATG4D	-0.00691606	0.31429
1041	ATG5	0.265821	0.40608
1042	ATG7	0.128951	0.209913
1043	ATG9A	0.114967	0.548174
1044	ATG9B	0.266954	0.324116
1045	ATIC	0.259559	0.360736
1046	ATL1	-0.0433361	0.422431
1047	ATL2	0.292851	0.40026
1048	ATL3	0.264118	0.377537
1049	ATM	0.194724	0.428899
1050	ATMIN	-0.0290959	0.412553
1051	ATN1	0.0197267	0.406609
1052	ATOH7	0.20611	0.137059
1053	ATOH8	0.42384	0.598843
1054	ATOX1	-0.0279794	0.446888
1055	ATP10A	0.0279039	0.323711
1056	ATP10B	-0.208888	0.0496997
1057	ATP10D	0.391621	0.516935
1058	ATP11A	0.13901	1.03518
1059	ATP11B	0.0569455	0.728886
1060	ATP11C	0.174881	0.45988
1061	ATP13A1	0.257011	0.29358
1062	ATP13A2	0.158628	0.393593
1063	ATP13A3	0.148357	0.487672
1064	ATP13A4	-0.241999	0.111872
1065	ATP1A1	0.092934	0.977999
1066	ATP1A2	0.632162	0.861896
1067	ATP1A3	-0.0224676	0.0294451
1068	ATP1A4	0.227905	0.11778
1069	ATP1B1	0.454661	0.830744
1070	ATP1B2	0.480107	0.413289
1071	ATP1B3	0.0924221	0.434258
1072	ATP23	0.0809458	0.23272
1073	ATP2A1	0.341295	0.465474
1074	ATP2A2	0.265338	0.598202
1075	ATP2A3	0.370334	0.817906
1076	ATP2B1	0.0471582	0.522523
1077	ATP2B2	0.243182	0.0442049
1078	ATP2B4	0.637415	0.829535
1079	ATP2C1	0.229716	0.581495
1080	ATP2C2	0.379765	0.694033
1081	ATP5F1A	0.078621	0.353943
1082	ATP5F1B	0.114106	0.374334
1083	ATP5F1C	-0.002431	0.325125
1084	ATP5F1D	-0.034188	0.722998
1085	ATP5F1E	-0.243045	0.572338
1086	ATP5IF1	0.212192	0.429458
1087	ATP5MC1	0.066926	0.493323
1088	ATP5MC2	0.174269	0.379202
1089	ATP5MC3	-0.0161397	0.353568
1090	ATP5ME	0.041251	0.776016
1091	ATP5MF	-0.129052	0.603979
1092	ATP5MG	-0.300778	0.437145
1093	ATP5MGL	-0.0395169	0.144855
1094	ATP5PB	-0.0131329	0.312311
1095	ATP5PD	-0.139563	0.405252
1096	ATP5PF	-0.287586	0.404378
1097	ATP5PO	-0.0442577	0.561389
1098	ATP6AP1	0.245337	0.373751
1099	ATP6AP2	-0.0322006	0.339897
1100	ATP6V0A1	0.344759	0.318704
1101	ATP6V0A2	0.13901	0.228444
1102	ATP6V0B	0.0366314	0.490921
1103	ATP6V0C	0.246261	0.148052
1104	ATP6V0D1	0.0912592	0.40925
1105	ATP6V0D2	0.424819	0.244088
1106	ATP6V0E1	-0.154629	0.345009
1107	ATP6V0E2	0.142652	0.615088
1108	ATP6V1A	0.262186	0.47
1109	ATP6V1B2	0.0671482	0.365677
1110	ATP6V1C1	0.072705	0.360751
1111	ATP6V1C2	0.0513604	0.576449
1112	ATP6V1D	0.227657	0.322784
1113	ATP6V1E1	0.110939	0.3122
1114	ATP6V1E2	0.522604	0.242978
1115	ATP6V1F	-0.0663566	0.465264
1116	ATP6V1G1	0.0656542	0.464313
1117	ATP6V1G2	0.246483	0.235707
1118	ATP6V1H	0.0793239	0.365884
1119	ATP7A	0.2599	0.425232
1120	ATP7B	0.152636	0.501862
1121	ATP8A1	0.24026	0.647417
1122	ATP8A2	0.200266	1.01392
1123	ATP8B1	0.357314	0.57623
1124	ATP8B2	0.441531	0.696035
1125	ATP8B3	0.315483	0.0812155
1126	ATP8B4	0.490904	0.644352
1127	ATP9A	0.128263	0.542158
1128	ATP9B	-0.166697	0.298192
1129	ATPAF1	0.326721	0.265261
1130	ATPAF2	0.0944218	0.2769
1131	ATPSCKMT	0.156595	0.264152
1132	ATR	0.226187	0.338333
1133	ATRAID	0.21489	0.288728
1134	ATRIP	0.345867	0.258466
1135	ATRN	0.192873	0.464208
1136	ATRNL1	0.513334	0.318683
1137	ATRX	0.0551114	0.445072
1138	ATXN1	-0.0200132	0.512881
1139	ATXN10	0.0001875	0.319615
1140	ATXN1L	-0.0591249	0.515522
1141	ATXN2	-0.0423532	0.406066
1142	ATXN2L	0.108949	0.509298
1143	ATXN3	0.00872774	0.244487
1144	ATXN7	-0.266106	0.416427
1145	ATXN7L1	0.256354	0.293223
1146	ATXN7L2	0.325724	0.237929
1147	ATXN7L3	0.117649	0.323631
1148	ATXN7L3B	0.00248099	0.361716
1149	AUH	0.151852	0.525031
1150	AUNIP	0.508434	0.173923
1151	AUP1	-0.0465177	0.352351
1152	AURKA	0.544067	0.435815
1153	AURKAIP1	0.0809972	0.56846
1154	AURKB	0.448929	0.526546
1155	AURKC	0.0369507	0.220367
1156	AUTS2	0.586174	0.406403
1157	AVEN	0.0157263	0.307165
1158	AVIL	0.178738	0.272975
1159	AVL9	0.160408	0.416579
1160	AVPI1	0.546637	0.647933
1161	AVPR1A	0.196728	0.419211
1162	AVPR2	0.284724	0.26262
1163	AXDND1	-0.25816	0.118005
1164	AXIN1	0.285987	0.290835
1165	AXIN2	0.589913	0.488784
1166	AXL	0.582914	0.591707
1167	AZGP1	0.404214	1.53491
1168	AZI2	0.0494019	0.33738
1169	AZIN1	0.266787	0.490909
1170	AZIN2	0.185179	0.236549
1171	AZU1	-0.182331	0.22556
1172	B2M	0.356703	0.769891
1173	B3GALNT1	0.228758	0.531799
1174	B3GALNT2	0.428307	0.32032
1175	B3GALT1	-0.0645479	0.16275
1176	B3GALT2	0.570121	0.448687
1177	B3GALT4	0.565311	0.434148
1178	B3GALT5	0.223452	0.242123
1179	B3GALT6	0.38792	0.4489
1180	B3GAT1	-0.0906075	0.920569
1181	B3GAT2	0.0391382	0.0483807
1182	B3GAT3	-0.0969344	0.504607
1183	B3GLCT	0.094502	0.316831
1184	B3GNT2	0.319931	0.493126
1185	B3GNT4	-0.0231374	0.155007
1186	B3GNT5	0.128161	0.662311
1187	B3GNT7	0.278553	0.401309
1188	B3GNT8	0.599968	0.325456
1189	B3GNT9	0.591369	0.549885
1190	B3GNTL1	0.281914	0.23428
1191	B4GALNT1	0.572038	0.234684
1192	B4GALNT3	0.470745	0.463902
1193	B4GALNT4	0.560866	0.810539
1194	B4GALT1	0.448246	0.507081
1195	B4GALT2	0.191747	0.323384
1196	B4GALT3	0.32109	0.300033
1197	B4GALT4	0.0451099	0.288274
1198	B4GALT5	0.207237	0.499501
1199	B4GALT6	-0.0677041	0.424481
1200	B4GALT7	-0.0515762	0.359783
1201	B4GAT1	0.231548	0.358146
1202	B9D1	0.268369	0.281322
1203	B9D2	-0.0435639	0.415641
1204	BAALC	0.178641	0.192905
1205	BAAT	0.0953673	0.100344
1206	BABAM1	0.174905	0.465626
1207	BABAM2	-0.0131519	0.306525
1208	BACE1	0.528128	0.285735
1209	BACE2	0.0814025	0.914263
1210	BACH1	0.173052	0.513197
1211	BACH2	0.477801	0.229626
1212	BAD	0.172809	0.484836
1213	BAG1	0.160127	0.373167
1214	BAG2	0.0918968	0.49162
1215	BAG3	0.260313	0.528582
1216	BAG4	0.0735699	0.429293
1217	BAG5	-0.119642	0.325418
1218	BAG6	-0.0651835	0.26479
1219	BAHCC1	0.0331459	0.366081
1220	BAHD1	0.11917	0.319929
1221	BAIAP2	0.273325	0.456974
1222	BAIAP2L1	0.293102	0.462364
1223	BAIAP2L2	0.215486	0.928999
1224	BAIAP3	0.335254	0.588268
1225	BAK1	0.327163	0.305641
1226	BAMBI	0.0776148	1.02698
1227	BANF1	-0.173633	0.430109
1228	BANK1	0.231778	1.20816
1229	BANP	0.24392	0.222314
1230	BAP1	0.134333	0.224464
1231	BARD1	0.219917	0.375053
1232	BARX2	0.105473	0.742751
1233	BASP1	0.299762	0.951532
1234	BATF	0.282473	0.771678
1235	BATF2	0.407748	0.428142
1236	BATF3	0.0552745	0.357957
1237	BAX	0.0588174	0.456729
1238	BAZ1A	0.0610275	0.459682
1239	BAZ1B	0.00908984	0.408047
1240	BAZ2A	-0.0459385	0.589676
1241	BAZ2B	0.0098678	0.365895
1242	BBC3	0.151429	0.471527
1243	BBIP1	0.00427974	0.226987
1244	BBOF1	-0.130385	0.276597
1245	BBOX1	0.186548	0.396012
1246	BBS1	0.1071	0.0986731
1247	BBS10	0.205419	0.439603
1248	BBS12	-0.142406	0.343226
1249	BBS2	0.32945	0.369156
1250	BBS4	0.16591	0.661023
1251	BBS5	0.197992	0.266076
1252	BBS7	-0.0937312	0.325792
1253	BBS9	0.388809	0.220935
1254	BBX	0.250986	0.497682
1255	BCAM	0.317932	0.699165
1256	BCAN	0.398218	0.176556
1257	BCAP29	0.205108	0.161734
1258	BCAP31	0.0164642	0.347343
1259	BCAR1	-0.00735382	0.387726
1260	BCAR3	0.580016	0.390098
1261	BCAS1	0.646119	0.81948
1262	BCAS2	0.0390085	0.321868
1263	BCAS3	0.272428	0.276194
1264	BCAS4	0.679765	0.314397
1265	BCAT1	0.32768	0.418101
1266	BCAT2	-0.0102492	0.551946
1267	BCCIP	0.0959071	0.301968
1268	BCDIN3D	0.277875	0.239232
1269	BCHE	0.209574	0.684202
1270	BCKDHA	0.0644585	0.106475
1271	BCKDHB	-0.0184317	0.494587
1272	BCKDK	0.190175	0.289293
1273	BCL10	0.0200179	0.374404
1274	BCL11A	0.603756	0.327375
1275	BCL11B	0.428413	0.299457
1276	BCL2	0.571419	0.538108
1277	BCL2A1	0.33768	0.599353
1278	BCL2L1	-0.0749834	0.329074
1279	BCL2L10	0.366301	0.518905
1280	BCL2L11	-0.15899	0.405316
1281	BCL2L12	0.144741	0.404586
1282	BCL2L13	0.00481255	0.307717
1283	BCL2L14	-0.166753	0.457316
1284	BCL2L15	0.372658	0.170266
1285	BCL2L2	0.127765	0.399353
1286	BCL3	0.0158531	0.762158
1287	BCL6	0.227475	0.622018
1288	BCL6B	0.262476	0.504923
1289	BCL7A	0.00528022	0.403387
1290	BCL7B	0.198404	0.269019
1291	BCL7C	0.330715	0.37629
1292	BCL9	0.0442293	0.549314
1293	BCL9L	0.218011	0.651747
1294	BCLAF1	0.010485	0.380806
1295	BCLAF3	-0.139568	0.343458
1296	BCO1	0.213779	0.279783
1297	BCO2	0.297925	0.143909
1298	BCOR	0.089806	0.648648
1299	BCORL1	0.0798509	0.400066
1300	BCR	-0.18144	0.322457
1301	BCS1L	0.0871576	0.353782
1302	BDH1	0.364619	0.409969
1303	BDH2	0.422912	0.4767
1304	BDKRB1	-0.104592	0.10167
1305	BDKRB2	0.441964	0.432746
1306	BDNF	0.501377	0.181151
1307	BDP1	0.0799688	0.547242
1308	BEAN1	0.185394	0.147948
1309	BECN1	0.0162177	0.465597
1310	BEGAIN	0.462231	0.203165
1311	BEND3	0.345789	0.512536
1312	BEND4	0.389004	0.906989
1313	BEND5	0.476856	0.37048
1314	BEND6	0.477383	0.194188
1315	BEND7	0.281713	0.35799
1316	BEST1	0.308598	0.196948
1317	BEST4	0.0265755	0.146325
1318	BET1	0.20231	0.271238
1319	BET1L	0.147275	0.229121
1320	BEX1	0.323903	0.996481
1321	BEX2	0.0718291	0.704102
1322	BEX3	0.2291	0.427223
1323	BEX4	0.45177	0.448212
1324	BEX5	0.270595	1.0092
1325	BFAR	0.185438	0.296571
1326	BFSP1	0.220279	0.197545
1327	BFSP2	0.179525	0.057502
1328	BGLAP	0.0330169	0.373603
1329	BGN	0.27235	0.907434
1330	BHLHA15	0.431175	0.943265
1331	BHLHE22	0.20571	0.152251
1332	BHLHE40	0.340139	1.05347
1333	BHLHE41	0.244746	0.8451
1334	BHMT	-0.224922	0.0708476
1335	BHMT2	0.667046	0.457679
1336	BICC1	0.0404585	0.621008
1337	BICD1	0.499947	0.67628
1338	BICD2	0.317246	0.379368
1339	BICDL1	0.205603	0.490928
1340	BICDL2	-0.35112	0.620601
1341	BICRA	0.232113	0.323512
1342	BICRAL	-0.1585	0.461114
1343	BID	-0.02061	0.309286
1344	BIK	0.331259	0.598346
1345	BIN1	0.505903	0.483381
1346	BIN2	0.436804	0.458105
1347	BIN3	0.487888	0.309825
1348	BIRC2	-0.0810915	0.455937
1349	BIRC3	0.340647	0.824198
1350	BIRC5	0.584882	0.62114
1351	BIRC6	0.219221	0.433027
1352	BIRC7	0.192162	0.196025
1353	BISPR	0.385698	0.340412
1354	BIVM	0.0855647	0.307029
1355	BLACAT1	0.265795	0.0738009
1356	BLCAP	0.101384	0.312188
1357	BLK	0.454542	0.33072
1358	BLM	0.531439	0.211941
1359	BLMH	0.293624	0.336242
1360	BLNK	0.137301	0.389193
1361	BLOC1S1	-0.065659	0.718515
1362	BLOC1S2	0.0201795	0.344553
1363	BLOC1S3	0.0464506	0.251522
1364	BLOC1S4	0.0697246	0.326408
1365	BLOC1S5	-0.0852062	0.268934
1366	BLOC1S6	0.00235506	0.471055
1367	BLVRA	0.252765	0.432646
1368	BLVRB	0.212048	0.568442
1369	BLZF1	-0.000418905	0.375293
1370	BMERB1	0.617807	0.500052
1371	BMF	0.0221127	0.572184
1372	BMI1	-0.0655652	0.388494
1373	BMP1	0.570519	0.365743
1374	BMP2	0.359032	0.52886
1375	BMP2K	0.165085	0.243286
1376	BMP4	0.589657	0.583113
1377	BMP5	0.0980967	0.820275
1378	BMP6	0.329725	0.840264
1379	BMP7	0.339784	0.833454
1380	BMP8A	0.0601609	0.377998
1381	BMP8B	0.0866621	0.427371
1382	BMPER	0.457841	0.454221
1383	BMPR1A	0.324059	0.386413
1384	BMPR1B	0.285499	0.72639
1385	BMPR2	0.0346866	0.533394
1386	BMS1	0.0462511	0.299279
1387	BMS1P4	-0.211373	0.147895
1388	BMX	-0.253535	0.517155
1389	BNC1	0.40787	0.155273
1390	BNC2	0.52252	0.307949
1391	BNIP1	0.0804457	0.326763
1392	BNIP2	0.395819	0.365796
1393	BNIP3	0.269856	0.4362
1394	BNIP3L	0.449365	0.477966
1395	BNIPL	0.471906	0.630466
1396	BOC	0.559651	0.574078
1397	BOD1	0.133843	0.318972
1398	BOD1L1	0.0216498	0.482571
1399	BOK	-0.16865	0.598373
1400	BOLA1	0.0489978	0.414276
1401	BOLA2B	-0.215198	0.2452
1402	BOLA3	0.0732158	0.352285
1403	BOP1	0.343926	0.570082
1404	BORA	0.218514	0.214559
1405	BORCS5	0.136881	0.233868
1406	BORCS6	0.180418	0.447468
1407	BORCS7	0.442577	0.402571
1408	BORCS8	0.194079	0.322997
1409	BPGM	-0.15262	0.368825
1410	BPHL	0.306718	0.350068
1411	BPI	0.33682	0.112969
1412	BPNT1	-0.0466571	0.367741
1413	BPNT2	0.221238	0.431432
1414	BPTF	-0.0430112	0.530392
1415	BRAF	0.222166	0.315381
1416	BRAP	-0.0115295	0.207824
1417	BRAT1	0.130872	0.377846
1418	BRCA1	0.467333	0.276083
1419	BRCA2	0.537032	0.146727
1420	BRCC3	0.185083	0.377247
1421	BRD1	-0.0721913	0.37892
1422	BRD2	0.14975	0.431832
1423	BRD3	0.0685895	0.541546
1424	BRD3OS	0.216417	0.297378
1425	BRD4	0.0254167	0.309849
1426	BRD7	-0.0583106	0.263114
1427	BRD8	0.188321	0.353242
1428	BRD9	0.406811	0.239113
1429	BRF1	0.169971	0.238692
1430	BRF2	0.305947	0.358248
1431	BRI3	-0.015645	0.473522
1432	BRI3BP	0.275192	0.402384
1433	BRICD5	0.211084	0.444035
1434	BRINP1	0.0654823	0.628064
1435	BRINP2	-0.229345	0.0440594
1436	BRIP1	0.549267	0.177724
1437	BRIX1	0.379949	0.279757
1438	BRK1	-0.225743	0.309952
1439	BRMS1	-0.105687	0.452458
1440	BRMS1L	-0.114767	0.287539
1441	BROX	0.200429	0.386817
1442	BRPF1	-0.0267387	0.335011
1443	BRPF3	-0.0671791	0.560245
1444	BRSK1	0.167003	0.601248
1445	BRSK2	0.385129	0.774814
1446	BRWD1	0.104354	0.352238
1447	BRWD3	-0.0224132	0.320963
1448	BSCL2	-0.0560206	0.169622
1449	BSDC1	-0.0381877	0.282995
1450	BSG	0.0231136	0.439079
1451	BSN	0.405372	0.129116
1452	BSPRY	0.247367	0.392622
1453	BST1	0.452726	0.246995
1454	BST2	0.402289	1.04123
1455	BTAF1	-0.0824657	0.603336
1456	BTBD1	0.151052	0.318602
1457	BTBD10	-0.163863	0.312138
1458	BTBD16	0.0324805	0.2128
1459	BTBD18	0.0127497	0.0222403
1460	BTBD19	0.371345	0.311548
1461	BTBD2	0.220894	0.303909
1462	BTBD3	0.260986	0.442617
1463	BTBD6	0.0815769	0.356149
1464	BTBD7	0.0382679	0.38788
1465	BTBD8	0.059607	0.303631
1466	BTBD9	-0.085883	0.320239
1467	BTC	0.0594669	0.355969
1468	BTD	0.352909	0.375989
1469	BTF3	0.0153725	0.447454
1470	BTF3L4	0.240544	0.279732
1471	BTG1	0.44208	0.416316
1472	BTG2	0.170309	1.10749
1473	BTG3	0.370278	0.557521
1474	BTK	0.501824	0.361766
1475	BTLA	0.433096	0.251481
1476	BTN2A1	0.477432	0.368645
1477	BTN2A2	0.505174	0.353322
1478	BTN3A1	0.408567	0.527787
1479	BTN3A2	0.423171	0.640452
1480	BTN3A3	0.366787	0.512471
1481	BTNL8	-0.0636268	0.0320867
1482	BTNL9	0.360473	0.401807
1483	BTRC	0.07332	0.379785
1484	BUB1	0.620006	0.411667
1485	BUB1B	0.493465	0.402633
1486	BUB3	0.0751766	0.308635
1487	BUD13	0.287864	0.291123
1488	BUD23	0.217148	0.315947
1489	BUD31	-0.149303	0.315889
1490	BYSL	0.443465	0.311893
1491	BZW1	0.21134	0.43359
1492	BZW2	0.404347	0.48418
1493	C10orf143	0.250225	0.199809
1494	C10orf55	0.276655	0.0541564
1495	C10orf67	-0.0890726	0.0270758
1496	C10orf88	-0.102258	0.259719
1497	C11orf16	0.186834	0.160727
1498	C11orf21	0.345688	0.191805
1499	C11orf24	0.0980683	0.31773
1500	C11orf42		0.31773
1501	C11orf54	0.412132	0.368941
1502	C11orf58	-0.0118386	0.260654
1503	C11orf65	-0.223274	0.0911452
1504	C11orf68	0.119266	0.312737
1505	C11orf71	0.262511	0.51973
1506	C11orf91	0.102336	0.0840747
1507	C11orf96	0.223099	1.11698
1508	C12orf42	0.350736	0.0413911
1509	C12orf43	0.155855	0.17156
1510	C12orf56	-0.197614	0.509882
1511	C12orf57	0.197334	0.716381
1512	C12orf60	0.535003	0.451293
1513	C12orf71		0.451293
1514	C12orf75	0.630219	0.623046
1515	C12orf76	0.107158	0.262466
1516	C13orf46	0.236872	0.563897
1517	C14orf119	0.105979	0.228226
1518	C14orf132	0.400614	0.529715
1519	C14orf28	0.415405	0.21846
1520	C14orf93	0.261366	0.23906
1521	C15orf39	0.421442	0.441242
1522	C15orf40	0.036718	0.171973
1523	C15orf48	-0.0285483	1.64812
1524	C15orf61	0.515052	0.240998
1525	C15orf62	0.224349	0.213949
1526	C16orf54	0.48363	0.559884
1527	C16orf74	0.388179	0.412555
1528	C16orf86	0.332191	0.367119
1529	C16orf87	0.306817	0.270071
1530	C16orf89	0.58708	0.587176
1531	C16orf95	0.175547	0.127301
1532	C16orf96	-0.0720627	0.120734
1533	C17orf100	0.0281527	0.309408
1534	C17orf107	0.086069	0.303101
1535	C17orf113	0.137126	0.30973
1536	C17orf58	0.360413	0.51659
1537	C17orf67	0.388273	0.268381
1538	C17orf75	0.0780947	0.240335
1539	C17orf78	0.145529	0.100947
1540	C17orf99	0.151874	0.0739942
1541	C18orf21	0.0126074	0.332976
1542	C18orf32	0.117635	0.197354
1543	C18orf54	0.229378	0.175005
1544	C19orf12	0.437393	0.188592
1545	C19orf18	0.0127966	0.614893
1546	C19orf25	0.110063	0.350085
1547	C19orf38	0.295165	0.332801
1548	C19orf44	0.281842	0.21877
1549	C19orf47	0.169426	0.209805
1550	C19orf53	-0.170231	0.506935
1551	C19orf67	0.0796355	0.0950329
1552	C19orf73	0.0139275	0.571802
1553	C19orf81	0.00565076	0.987859
1554	C19orf84	-0.0243388	0.045439
1555	C1D	0.273538	0.312842
1556	C1GALT1	0.274726	0.324109
1557	C1GALT1C1	0.145579	0.362618
1558	C1GALT1C1L	0.2235	0.361529
1559	C1QA	0.37006	0.832687
1560	C1QB	0.3363	0.818677
1561	C1QBP	0.208585	0.443323
1562	C1QC	0.333666	0.789764
1563	C1QL1	0.446951	0.358089
1564	C1QL3	-0.024909	0.397041
1565	C1QL4	-0.00738708	0.0737831
1566	C1QTNF1	0.568272	0.643727
1567	C1QTNF12	0.112673	0.238489
1568	C1QTNF2	0.331187	0.3814
1569	C1QTNF3	0.147062	0.966132
1570	C1QTNF4	0.227471	0.295694
1571	C1QTNF6	0.193581	0.412669
1572	C1QTNF7	0.50022	0.493055
1573	C1R	0.463501	0.857564
1574	C1RL	0.36779	0.68185
1575	C1S	0.490928	0.856614
1576	C1orf115	0.343326	0.74744
1577	C1orf116	0.367917	0.531123
1578	C1orf122	0.0289057	0.596852
1579	C1orf127	0.159507	0.106077
1580	C1orf131	0.118929	0.282629
1581	C1orf146	-0.00269435	0.069641
1582	C1orf159	0.302219	0.339614
1583	C1orf162	0.396562	0.387954
1584	C1orf174	-0.00377249	0.25663
1585	C1orf198	0.412551	0.339233
1586	C1orf21	0.306135	0.490551
1587	C1orf210	0.378838	0.384073
1588	C1orf216	0.407176	0.30711
1589	C1orf220	0.23958	0.163746
1590	C1orf226	0.154605	0.489561
1591	C1orf35	0.0373435	0.427344
1592	C1orf43	0.305006	0.307243
1593	C1orf50	0.0536477	0.240109
1594	C1orf52	0.131255	0.262395
1595	C1orf53	0.37588	0.518247
1596	C1orf54	0.552578	0.546801
1597	C1orf56	0.0814481	0.359431
1598	C1orf74	0.242549	0.364411
1599	C2	0.184461	0.628637
1600	C20orf144	0.111194	0.241674
1601	C20orf202	0.266829	0.0626374
1602	C20orf204	0.336287	0.179786
1603	C20orf96	0.113998	0.543109
1604	C21orf58	0.445943	0.337685
1605	C21orf91	0.497818	0.311745
1606	C22orf15	0.173839	0.145756
1607	C22orf23	-0.0400058	0.39452
1608	C22orf31	0.110118	0.177145
1609	C22orf39	0.385851	0.250404
1610	C2CD2	0.245711	0.33962
1611	C2CD2L	-0.0257682	0.351427
1612	C2CD3	-0.0412592	0.340009
1613	C2CD4A	0.0325033	0.664847
1614	C2CD4B	-0.024167	0.724053
1615	C2CD4C	0.034415	0.524166
1616	C2CD4D	0.274664	0.420232
1617	C2CD5	-0.0436997	0.409577
1618	C2CD6	-0.0277171	0.111372
1619	C2orf15	0.35979	0.322243
1620	C2orf42	-0.151641	0.194439
1621	C2orf49	0.0903925	0.333272
1622	C2orf66	-0.0800109	0.136495
1623	C2orf68	0.00510082	0.237998
1624	C2orf69	0.112294	0.452207
1625	C2orf72	0.296201	1.18013
1626	C2orf74	-0.07491	0.18131
1627	C2orf76	0.161551	0.376875
1628	C2orf81	-0.0346586	0.191096
1629	C2orf88	0.569155	0.418721
1630	C2orf92	0.196334	0.240945
1631	C3	0.292765	1.25972
1632	C3AR1	0.242631	0.520232
1633	C3orf18	0.566003	0.366017
1634	C3orf20	0.117019	0.0661177
1635	C3orf33	0.0739037	0.248193
1636	C3orf38	0.101819	0.31905
1637	C3orf49	-0.126086	0.0590799
1638	C3orf52	0.118938	0.398702
1639	C3orf62	-0.0131236	0.339114
1640	C3orf70	0.660726	0.471505
1641	C3orf80	0.109982	0.339608
1642	C4A	0.159048	1.01247
1643	C4B	0.228058	1.02875
1644	C4BPA	0.16472	0.202993
1645	C4BPB	-0.0307318	0.0541452
1646	C4orf19	0.202487	0.518361
1647	C4orf3	0.259586	0.331581
1648	C4orf33	0.354534	0.261104
1649	C4orf46	0.136083	0.32288
1650	C4orf50	0.0127425	0.103174
1651	C5	-0.151705	0.556773
1652	C5AR1	0.139043	0.638072
1653	C5AR2	0.245181	0.0930592
1654	C5orf15	0.222896	0.441561
1655	C5orf22	0.176032	0.364949
1656	C5orf24	-0.000391061	0.533544
1657	C5orf34	0.436638	0.20649
1658	C5orf58	0.0889605	0.0625954
1659	C5orf63	0.121611	0.252905
1660	C6	0.295832	0.369837
1661	C6orf120	0.299266	0.445566
1662	C6orf132	0.222896	0.42531
1663	C6orf136	0.167006	0.303019
1664	C6orf141	0.198314	0.320652
1665	C6orf163	-0.0554054	0.233992
1666	C6orf226	-0.120864	0.660638
1667	C6orf47	0.433586	0.215404
1668	C6orf52	0.148291	0.504859
1669	C6orf58	0.213593	0.0932519
1670	C6orf62	0.298826	0.343606
1671	C6orf89	0.437512	0.249692
1672	C7	0.599621	0.987569
1673	C7orf25	-0.157204	0.0928169
1674	C7orf50	0.120449	0.469723
1675	C7orf57	-0.00378139	0.253747
1676	C8G	0.0405366	0.319482
1677	C8orf33	0.345241	0.362024
1678	C8orf48	-0.020597	0.111175
1679	C8orf58	0.377907	0.316375
1680	C8orf76	-0.0149832	0.32991
1681	C8orf82	-0.0109987	0.618255
1682	C8orf88	0.647413	0.446215
1683	C9orf152	0.150321	0.626963
1684	C9orf153	0.0327393	0.0856177
1685	C9orf163	0.554142	0.240543
1686	C9orf40	0.262032	0.323425
1687	C9orf43	0.136198	0.21086
1688	C9orf50	0.20367	0.0788369
1689	C9orf72	0.163139	0.458685
1690	C9orf78	-0.034459	0.271986
1691	C9orf85	0.301991	0.272998
1692	CA11	0.667584	0.56792
1693	CA12	0.16046	0.588075
1694	CA13	0.212288	0.55555
1695	CA14	0.514289	0.454851
1696	CA2	0.349541	0.652519
1697	CA3	-0.113553	1.2531
1698	CA4	0.144109	0.4196
1699	CA5B	-0.0686423	0.452392
1700	CA8	0.160871	0.540905
1701	CA9	0.0709436	0.200974
1702	CAAP1	0.16611	0.369275
1703	CAB39	0.142534	0.441324
1704	CAB39L	0.239533	0.59207
1705	CABCOCO1	0.0691345	0.774411
1706	CABIN1	0.153952	0.277809
1707	CABLES1	0.426641	0.321912
1708	CABLES2	0.264967	0.307834
1709	CABP1	0.494342	0.154312
1710	CABP4	0.448769	0.391041
1711	CABP7	0.0172556	0.11746
1712	CABYR	0.338004	0.171455
1713	CACFD1	0.227194	0.457177
1714	CACHD1	0.605082	0.504516
1715	CACNA1A	0.38991	0.0864193
1716	CACNA1C	0.421261	0.417055
1717	CACNA1D	0.258232	1.13767
1718	CACNA1E	-0.151617	0.0191914
1719	CACNA1F	0.132019	0.0428876
1720	CACNA1G	0.269696	0.472527
1721	CACNA1H	0.345913	0.86044
1722	CACNA1I	0.14368	0.197117
1723	CACNA1S	-0.00260192	0.158865
1724	CACNA2D1	0.490106	0.783593
1725	CACNA2D2	-0.0841598	0.437453
1726	CACNA2D3	0.532148	0.294547
1727	CACNA2D4	0.486381	0.105824
1728	CACNB1	0.571521	0.331285
1729	CACNB2	0.257581	0.274071
1730	CACNB3	0.274282	0.455079
1731	CACNB4	0.444135	0.198905
1732	CACNG4	0.570774	1.08421
1733	CACNG8	-0.221044	0.0552025
1734	CACTIN	0.0101278	0.254045
1735	CACUL1	-0.130432	0.327871
1736	CACYBP	0.0873831	0.335715
1737	CAD	0.282299	0.428213
1738	CADM1	0.122216	0.674862
1739	CADM2	0.00355026	0.610101
1740	CADM3	0.479554	0.346576
1741	CADM4	0.557024	0.410264
1742	CADPS	0.347067	0.826371
1743	CADPS2	0.0907658	0.534049
1744	CAGE1	0.167754	0.061137
1745	CAHM	0.39508	0.367157
1746	CALB1	0.19148	0.0537684
1747	CALB2	0.212212	0.191115
1748	CALCB	0.140005	0.104239
1749	CALCOCO1	0.292823	0.37612
1750	CALCOCO2	0.180426	0.259494
1751	CALCR	-0.0303712	0.032118
1752	CALCRL	0.288578	0.649676
1753	CALD1	0.589578	0.711817
1754	CALHM2	0.5508	0.448668
1755	CALHM5	0.519814	0.2189
1756	CALHM6	0.408509	0.290851
1757	CALM1	0.664445	0.391587
1758	CALM2	-0.0388637	0.293351
1759	CALM3	0.0500914	0.285549
1760	CALML4	0.0904298	0.0519462
1761	CALML6	0.161127	0.271234
1762	CALN1	-0.019978	0.288096
1763	CALR	0.327757	0.429265
1764	CALU	-0.0499468	0.502929
1765	CALY	0.105686	0.148404
1766	CAMK1	0.372138	0.406079
1767	CAMK1D	0.506635	0.528702
1768	CAMK1G	0.517057	0.307293
1769	CAMK2A	0.503609	0.211217
1770	CAMK2B	0.20142	0.704835
1771	CAMK2D	0.136159	0.528489
1772	CAMK2G	0.61014	0.375949
1773	CAMK2N1	0.399637	0.994366
1774	CAMK2N2	0.0834275	0.611139
1775	CAMK4	0.359245	0.385452
1776	CAMKK1	0.099714	0.434618
1777	CAMKK2	0.435485	0.803578
1778	CAMKMT	-0.207627	0.247119
1779	CAMLG	0.170455	0.261205
1780	CAMP	0.166744	0.292188
1781	CAMSAP1	0.113363	0.39314
1782	CAMSAP2	0.123085	0.406148
1783	CAMSAP3	0.462711	0.385088
1784	CAMTA1	0.307269	0.21087
1785	CAMTA2	-0.128897	0.398669
1786	CAND1	0.0957027	0.409803
1787	CAND2	0.651476	0.354015
1788	CANT1	0.462652	0.46047
1789	CANX	0.0995268	0.526412
1790	CAP1	0.400665	0.291474
1791	CAP2	0.536102	0.619991
1792	CAPG	0.536452	0.796059
1793	CAPN1	0.469974	0.359483
1794	CAPN10	0.19081	0.320688
1795	CAPN11	0.125634	0.111706
1796	CAPN12	0.0427397	0.220679
1797	CAPN13	0.368447	0.524685
1798	CAPN14	-0.0792303	0.127483
1799	CAPN15	0.423567	0.35744
1800	CAPN2	0.194564	0.57253
1801	CAPN3	0.416605	0.157009
1802	CAPN5	-0.0790448	0.85125
1803	CAPN6	0.489106	0.785021
1804	CAPN7	0.0804076	0.404492
1805	CAPN8	0.501342	0.40235
1806	CAPN9	-0.162596	0.558008
1807	CAPNS1	-0.206996	0.371956
1808	CAPRIN1	0.0372959	0.490156
1809	CAPRIN2	0.132923	0.339417
1810	CAPS	-0.0583702	0.82334
1811	CAPS2	0.466647	0.23268
1812	CAPZA1	0.239293	0.350578
1813	CAPZA2	0.179836	0.432614
1814	CAPZB	0.419941	0.249082
1815	CARD10	0.0808968	0.438626
1816	CARD11	0.529619	0.426
1817	CARD14	0.20822	0.24881
1818	CARD16	0.417589	0.475374
1819	CARD19	0.3434	0.333444
1820	CARD6	0.356974	0.320527
1821	CARD8	0.133365	0.26046
1822	CARD9	0.468694	0.255635
1823	CARF	0.191933	0.253513
1824	CARHSP1	0.264165	0.349673
1825	CARM1	0.0502934	0.42817
1826	CARMIL1	0.199847	0.463641
1827	CARMIL2	0.36718	0.327664
1828	CARMIL3	0.373157	0.12035
1829	CARNMT1	0.085299	0.373897
1830	CARNS1	0.0672721	0.216329
1831	CARS1	-0.0778345	0.282549
1832	CARS2	0.184128	0.322659
1833	CASC11	0.104631	0.219219
1834	CASC18	0.25009	0.070832
1835	CASC2	-0.13604	0.150016
1836	CASC3	-0.136856	0.318377
1837	CASC8	0.309162	0.331289
1838	CASC9	-0.0211556	0.234127
1839	CASD1	0.208897	0.461987
1840	CASK	-0.122106	0.298814
1841	CASKIN1	0.468186	0.367097
1842	CASKIN2	0.37827	0.33477
1843	CASP1	0.515023	0.517842
1844	CASP10	0.431244	0.418207
1845	CASP2	0.0441526	0.561989
1846	CASP3	0.201619	0.352243
1847	CASP4	0.381061	0.437179
1848	CASP5	0.0960564	0.059802
1849	CASP6	-0.0161278	0.352399
1850	CASP7	0.377616	0.540834
1851	CASP8	0.187148	0.433163
1852	CASP8AP2	0.0267797	0.523978
1853	CASP9	-0.000999616	0.264146
1854	CASQ1	0.443354	0.749099
1855	CASQ2	0.537415	0.701161
1856	CASR	0.208066	0.0177899
1857	CASS4	0.196977	0.22201
1858	CAST	0.151262	0.454411
1859	CASTOR1	0.218317	0.1221
1860	CASTOR2	0.207348	0.367981
1861	CASZ1	0.181374	0.469537
1862	CAT	0.330591	0.533953
1863	CATIP	-0.131315	0.291161
1864	CATSPER1	0.213574	0.0733465
1865	CATSPER2	0.168617	0.253641
1866	CATSPER3	0.254152	0.186026
1867	CATSPERB	0.00458372	0.29381
1868	CATSPERE	0.0370333	0.129931
1869	CATSPERG	-0.102742	0.186946
1870	CAV1	0.697292	0.753922
1871	CAV2	0.669116	0.517333
1872	CAVIN1	0.694314	0.660543
1873	CAVIN2	0.566369	0.735865
1874	CAVIN3	0.499778	0.622831
1875	CAVIN4	0.0928349	0.379086
1876	CBARP	0.0109529	0.2361
1877	CBFA2T2	0.0823722	0.508554
1878	CBFA2T3	-0.0748981	0.495566
1879	CBFB	0.0739143	0.467268
1880	CBL	0.353041	0.412168
1881	CBLB	0.0914169	0.348015
1882	CBLC	0.353174	0.903647
1883	CBLL1	0.370767	0.55995
1884	CBLN1	-0.0122722	0.254039
1885	CBLN3	0.0974701	0.4278
1886	CBLN4	-0.0730506	0.10299
1887	CBR1	0.392984	0.513005
1888	CBR3	-0.0993681	0.815505
1889	CBR4	0.252071	0.519135
1890	CBS	0.128228	0.49693
1891	CBX1	-0.0753015	0.358426
1892	CBX2	0.389301	0.560843
1893	CBX3	0.370694	0.391052
1894	CBX4	0.234709	0.498887
1895	CBX5	0.00812315	0.438064
1896	CBX6	0.142318	0.533977
1897	CBX7	0.725221	0.374635
1898	CBX8	0.522091	0.390715
1899	CBY1	0.088192	0.389017
1900	CBY3	0.17147	0.130602
1901	CC2D1A	0.251927	0.301041
1902	CC2D1B	0.0938887	0.222331
1903	CC2D2A	0.198356	0.397885
1904	CC2D2B	0.389155	0.0809432
1905	CCAR1	0.0911874	0.376709
1906	CCAR2	0.456244	0.318484
1907	CCBE1	0.398039	0.342934
1908	CCDC102A	0.417471	0.414693
1909	CCDC102B	0.17697	0.237748
1910	CCDC106	0.0066636	0.439243
1911	CCDC107	0.387555	0.421526
1912	CCDC110	0.416134	0.422449
1913	CCDC112	0.0529481	0.418391
1914	CCDC115	0.46838	0.267892
1915	CCDC116	0.21392	0.102553
1916	CCDC117	-0.0402441	0.395492
1917	CCDC12	0.0185987	0.373014
1918	CCDC120	0.078166	0.330323
1919	CCDC121	0.0603347	0.327313
1920	CCDC122	0.193298	0.298477
1921	CCDC124	-0.0876411	0.525785
1922	CCDC125	0.33934	0.46296
1923	CCDC126	0.0940576	0.332248
1924	CCDC127	0.103795	0.179009
1925	CCDC13	0.29506	0.0561718
1926	CCDC134	0.0220046	0.360453
1927	CCDC136	0.451097	0.462261
1928	CCDC137	-0.060616	0.385202
1929	CCDC138	0.166379	0.341762
1930	CCDC14	0.264188	0.454075
1931	CCDC141	-0.0988635	0.414152
1932	CCDC142	0.0950226	0.313196
1933	CCDC144A	0.0219677	0.252533
1934	CCDC146	0.307279	0.394639
1935	CCDC148	0.279095	0.137117
1936	CCDC149	0.263507	0.299115
1937	CCDC15	0.168536	0.332063
1938	CCDC150	0.393305	0.0707086
1939	CCDC152	0.260999	0.18565
1940	CCDC154	-0.0349889	0.756573
1941	CCDC157	0.0394769	0.236747
1942	CCDC158	0.281765	0.143232
1943	CCDC159	0.252591	0.501686
1944	CCDC163	0.166836	0.476694
1945	CCDC167	-0.0725084	0.60087
1946	CCDC168	-0.172012	0.0500314
1947	CCDC17	-0.0780945	0.442163
1948	CCDC170	0.167596	0.347713
1949	CCDC171	0.104909	0.123617
1950	CCDC174	0.248111	0.189859
1951	CCDC18	0.519027	0.142144
1952	CCDC180	0.194236	0.122567
1953	CCDC181	0.498877	0.161766
1954	CCDC183	-0.0464597	0.343159
1955	CCDC184	0.0808482	0.338973
1956	CCDC186	0.179117	0.631436
1957	CCDC187	0.147679	0.27752
1958	CCDC188	0.117135	0.275058
1959	CCDC191	0.100878	0.297909
1960	CCDC192	0.0389298	0.106979
1961	CCDC194	0.0472263	0.246129
1962	CCDC196	0.1023	0.0286644
1963	CCDC200	0.147549	0.129315
1964	CCDC22	0.222143	0.326592
1965	CCDC24	0.229065	0.471563
1966	CCDC25	0.286726	0.343731
1967	CCDC26	-0.0431818	0.0800785
1968	CCDC28A	0.280902	0.431384
1969	CCDC28B	0.124989	0.385408
1970	CCDC3	0.388817	0.715125
1971	CCDC30	-0.106594	0.12617
1972	CCDC32	0.257084	0.215321
1973	CCDC34	0.308464	0.356219
1974	CCDC38	0.127973	0.0249624
1975	CCDC39	0.0450006	0.0277991
1976	CCDC40	0.426133	0.363249
1977	CCDC43	0.147158	0.286753
1978	CCDC47	0.322096	0.387589
1979	CCDC50	0.0605667	0.484481
1980	CCDC51	0.170784	0.344948
1981	CCDC57	0.148826	0.415878
1982	CCDC59	0.0818047	0.249153
1983	CCDC6	0.11488	0.574207
1984	CCDC61	0.0287346	0.396211
1985	CCDC62	0.14758	0.0812391
1986	CCDC65	0.073707	0.305694
1987	CCDC66	-0.0219107	0.286534
1988	CCDC68	0.445596	0.440944
1989	CCDC69	0.706737	0.554481
1990	CCDC7	0.0698766	0.165206
1991	CCDC71	0.0708914	0.285305
1992	CCDC71L	0.265933	0.422564
1993	CCDC73	0.116706	0.0522273
1994	CCDC74A	0.193112	0.80858
1995	CCDC74B	0.205181	0.673246
1996	CCDC77	0.0298846	0.277369
1997	CCDC78	0.274268	0.74447
1998	CCDC8	0.670861	0.545835
[truncated: 14,060 more rows]

## Sheet: SEQUOIA
Gene	pcc	rmse
A1BG	0.253326	0.0558899
A2M	0.399007	0.949854
A2ML1	0.459667	0.33302
A4GALT	0.334802	0.583866
AAAS	0.134719	0.247298
AACS	0.37021	0.318812
AADAT	0.252739	0.793168
AAGAB	0.495663	0.293366
AAK1	0.085452	0.477028
AAMDC	-0.0957493	0.365623
AAMP	0.322947	0.340561
AANAT	-0.152215	0.0541794
AAR2	0.019451	0.416994
AARD	0.0229219	0.284035
AARS1	0.605945	0.337543
AARS2	0.179896	0.234071
AARSD1	-0.0314064	0.252373
AASDH	-0.241628	0.430358
AASDHPPT	-0.228078	0.350649
AASS	0.133636	0.452173
AATBC	0.320882	0.365744
AATF	0.0525408	0.263749
AATK	0.147918	0.476337
ABAT	0.459044	0.75167
ABCA1	0.160146	0.584773
ABCA10	0.216127	0.211218
ABCA12	0.202125	0.189148
ABCA13	-0.123298	0.0516915
ABCA2	0.233292	0.488108
ABCA3	0.289002	0.641375
ABCA4	0.074468	0.106401
ABCA5	0.109072	0.337871
ABCA6	0.338334	0.355815
ABCA7	0.125296	0.424863
ABCA8	0.445294	0.573088
ABCA9	0.31964	0.262654
ABCB1	0.481889	0.597522
ABCB10	-0.043434	0.41454
ABCB11	-0.236817	0.096876
ABCB4	0.264541	0.140277
ABCB5	0.0648891	0.219533
ABCB6	0.143947	0.198426
ABCB7	-0.138511	0.270309
ABCB8	0.061111	0.363416
ABCB9	0.151901	0.189543
ABCC1	-0.0521223	0.472071
ABCC10	0.022877	0.310969
ABCC11	0.122502	0.990635
ABCC2	0.155309	0.104952
ABCC3	0.611469	0.638884
ABCC4	0.285352	1.11117
ABCC5	0.313164	0.509258
ABCC6	0.242391	0.460276
ABCC8	0.0112345	0.46833
ABCC9	0.69066	0.648096
ABCD1	0.339286	0.359079
ABCD2	0.48676	0.13671
ABCD3	0.0895866	0.362576
ABCD4	0.32893	0.253542
ABCE1	0.0990041	0.412487
ABCF1	-0.0900105	0.342673
ABCF2	0.0224688	0.334925
ABCF3	-0.000511912	0.272012
ABCG1	-0.209692	0.725815
ABCG2	0.330139	0.559147
ABCG4	0.032332	0.0708002
ABCG5	0	0.035988
ABCG8	0.141409	0.0705837
ABHD1	0.294251	0.380077
ABHD10	0.408111	0.391582
ABHD11	-0.0129104	0.717485
ABHD12	0.033371	0.695889
ABHD12B	0.273219	0.0539509
ABHD13	0.137847	0.347232
ABHD14A	0.13794	0.565452
ABHD14B	0.248227	0.47565
ABHD15	0.036017	0.371348
ABHD16A	0.174725	0.174631
ABHD17A	0.0873548	0.371561
ABHD17B	0.134187	0.629831
ABHD17C	0.378358	0.591384
ABHD18	-0.0513591	0.297262
ABHD2	-0.00736176	1.00647
ABHD3	0.0605773	0.472368
ABHD4	-0.0924079	0.467259
ABHD5	-0.0769833	0.293654
ABHD6	0.226472	0.327373
ABHD8	-0.0718056	0.45113
ABI1	-0.127876	0.38795
ABI2	0.174838	0.273015
ABI3	0.336401	0.546903
ABI3BP	0.581327	0.701642
ABITRAM	0.236497	0.335106
ABL1	0.313723	0.41593
ABL2	0.300819	0.267374
ABLIM1	0.246492	0.722286
ABLIM2	0.172461	0.34701
ABLIM3	-0.1628	0.564601
ABO	0.40577	0.693378
ABR	0.493732	0.366046
ABRACL	0.229904	0.657255
ABRAXAS1	0.24204	0.3004
ABRAXAS2	-0.244641	0.344867
ABT1	0.100551	0.347576
ABTB1	0.42244	0.446125
ABTB2	0.0179298	0.591103
ACAA1	0.391427	0.380219
ACAA2	-0.230422	0.662019
ACACA	0.284462	0.662283
ACACB	0.676021	0.564235
ACAD10	0.519744	0.276421
ACAD11	-0.0729104	0.1644
ACAD8	0.149225	0.913699
ACAD9	0.116232	0.257786
ACADL	0.306698	0.931994
ACADM	-0.254682	0.537286
ACADS	0.0902049	0.56513
ACADSB	0.266688	0.691378
ACADVL	0.0449416	0.481181
ACAN	-0.0149691	0.39056
ACAP1	0.476247	0.434798
ACAP2	0.12298	0.390446
ACAP3	0.389839	0.440576
ACAT1	-0.185101	0.518395
ACAT2	0.561108	0.539804
ACBD3	0.00633931	0.453743
ACBD4	0.153959	0.459778
ACBD5	0.144323	0.406636
ACBD6	0.271727	0.278321
ACBD7	0.230872	0.375433
ACCS	-0.140785	0.565098
ACD	0.157821	0.35672
ACE	0.128701	0.53336
ACE2	-0.00611336	0.120848
ACER2	-0.00872859	0.826049
ACER3	0.175112	0.739368
ACHE	0.102165	0.744628
ACIN1	0.339689	0.323336
ACKR1	0.0586325	1.13264
ACKR2	0.0654184	0.304094
ACKR3	0.487753	0.672026
ACKR4	0.0588827	0.0807955
ACLY	0.225796	0.629222
ACMSD	-0.0834033	0.0805566
ACO1	0.263309	0.374079
ACO2	0.10282	0.427874
ACOT1	0.249555	0.496342
ACOT11	0.690892	0.509895
ACOT13	0.320629	0.298574
ACOT2	0.250235	0.533274
ACOT4	0.0301966	0.384946
ACOT7	-0.161984	0.371125
ACOT8	0.384515	0.293577
ACOT9	-0.00606112	0.305272
ACOX1	0.416654	0.324715
ACOX2	0.437035	0.767848
ACOX3	0.24025	0.46253
ACOXL	0.239764	0.404224
ACP1	0.514771	0.268157
ACP2	0.602715	0.421944
ACP3	0.50923	1.33466
ACP4	0.0454722	0.449346
ACP5	0.27727	1.09798
ACP6	0.350845	0.36238
ACP7	0.221511	0.13377
ACR	0.0774176	0.15691
ACRBP	0.176972	0.31277
ACRV1	0.428127	0.27781
ACSBG1	0.201133	0.230325
ACSBG2	0.030628	0.0654782
ACSF2	0.563826	0.717254
ACSF3	0.140777	0.270993
ACSL1	0.336565	0.690201
ACSL3	0.325796	0.732622
ACSL4	0.734274	0.597953
ACSL5	0.197444	1.0979
ACSL6	0.182515	0.0914644
ACSM1	0.197435	1.86427
ACSM3	-0.134221	0.899304
ACSM4	-0.0832893	0.0439999
ACSM5	0.152979	0.11191
ACSS1	0.33626	0.441779
ACSS2	0.32689	0.301486
ACSS3	0.46734	0.461286
ACTA1	0.321398	1.50207
ACTA2	0.562547	1.26068
ACTB	0.229594	0.447382
ACTC1	0.307026	1.47266
ACTG1	0.197585	0.525763
ACTG2	0.539154	1.44403
ACTL6A	0.0952888	0.430174
ACTN1	0.585358	0.655274
ACTN2	0.0579182	0.894264
ACTN3	0.289351	0.0594171
ACTN4	0.434168	0.414633
ACTR10	0.257027	0.256223
ACTR1A	-0.309996	0.34365
ACTR1B	-0.0711544	0.361053
ACTR2	-0.0166496	0.462694
ACTR3	0.260701	0.401622
ACTR3B	0.300116	0.311722
ACTR3C	0.214202	0.214833
ACTR5	0.0832801	0.327894
ACTR6	-0.26529	0.344498
ACTR8	-0.0271277	0.480581
ACTRT3	0.0604579	0.264301
ACVR1	0.111899	0.470969
ACVR1B	0.0410819	0.483787
ACVR1C	-0.000772223	0.090847
ACVR2A	-0.158946	0.395897
ACVR2B	0.22525	0.287935
ACVRL1	0.44131	0.519537
ACY1	-0.0631573	0.23697
ACY3	0.247037	0.758377
ACYP1	0.0668953	0.416348
ACYP2	0.217415	0.271262
ADA	0.449308	0.416874
ADA2	0.436219	0.66578
ADAD2	0.133676	0.123111
ADAM10	0.295897	0.503562
ADAM11	0.015136	0.274775
ADAM12	0.399737	0.220402
ADAM15	0.0568072	0.433477
ADAM17	0.0548381	0.335545
ADAM19	0.735424	0.566515
ADAM20	-0.0255374	0.160235
ADAM21	0.0773681	0.352797
ADAM22	0.513992	0.696593
ADAM23	0.240691	0.321923
ADAM28	0.490372	0.465997
ADAM32	0.116109	0.29533
ADAM33	0.510381	0.829735
ADAM8	0.306033	0.454857
ADAM9	0.114759	0.74604
ADAMDEC1	0.293464	0.598537
ADAMTS1	0.597426	1.0225
ADAMTS10	0.476667	0.528466
ADAMTS12	0.170568	0.285548
ADAMTS13	0.273263	0.404273
ADAMTS14	0.23441	0.168195
ADAMTS15	0.456806	0.320661
ADAMTS16	-0.040058	0.161319
ADAMTS17	0.206895	0.204898
ADAMTS18	0.158825	0.103984
ADAMTS2	0.43857	0.708026
ADAMTS3	-0.231058	0.420648
ADAMTS4	0.12915	0.909991
ADAMTS5	0.576005	0.497229
ADAMTS6	0.0806596	0.232478
ADAMTS7	0.241628	0.216635
ADAMTS8	0.522024	0.551763
ADAMTS9	0.295587	0.621497
ADAMTSL1	0.134884	1.04393
ADAMTSL2	0.384386	0.570215
ADAMTSL3	0.540697	0.655264
ADAMTSL4	0.622729	0.395278
ADAMTSL5	0.431355	0.294284
ADAP1	0.170259	0.326315
ADAP2	0.406339	0.357634
ADAR	0.0906212	0.488776
ADARB1	-0.0984063	0.452707
ADARB2	0.362683	0.553358
ADAT1	0.0234974	0.429033
ADAT2	-0.111914	0.394453
ADAT3	-0.0473408	0.370663
ADCK1	0.0144507	0.320309
ADCK2	0.155817	0.382581
ADCK5	0.210088	0.54931
ADCY1	0.0917536	0.702096
ADCY10	0.115085	0.132785
ADCY2	0.409089	0.539703
ADCY3	0.718443	0.545642
ADCY4	0.126043	0.533083
ADCY5	0.56013	0.747725
ADCY6	0.0450841	0.631886
ADCY7	0.446783	0.385722
ADCY9	0.551394	0.392584
ADCYAP1	0.271379	0.263771
ADCYAP1R1	0.154455	0.26552
ADD1	0.412801	0.251846
ADD2	0.229987	0.451683
ADD3	-0.0357023	0.887669
ADGRA2	0.624649	0.952566
ADGRA3	0.194756	0.346171
ADGRB1	0.317422	0.385444
ADGRB2	0.336702	0.37099
ADGRB3	0.283395	0.194826
ADGRD1	0.469365	0.528547
ADGRE1	0.386875	0.1282
ADGRE2	0.32909	0.300046
ADGRE3	0.428607	0.125661
ADGRE5	0.242243	0.630446
ADGRF1	0.176423	1.18927
ADGRF3	0.104345	0.0836378
ADGRF5	0.201783	1.39445
ADGRG1	0.16885	0.539126
ADGRG2	0.376351	0.450487
ADGRG3	0.222219	0.132372
ADGRG5	0.573157	0.235692
ADGRG6	0.605574	0.572745
ADGRL1	0.172501	0.580525
ADGRL2	0.418683	0.637453
ADGRL3	0.42672	0.210254
ADGRL4	0.324958	0.584004
ADGRV1	0.11237	0.369427
ADH1B	0.162522	0.447017
ADH1C	0.0950798	0.810248
ADH5	0.489913	0.455627
ADH6	-0.0895196	0.244345
ADHFE1	-0.127363	0.610054
ADI1	0.503128	0.394826
ADIPOR1	0.420334	0.418075
ADIPOR2	-0.134604	0.368069
ADK	-0.00172965	0.377127
ADM	-0.012398	1.06077
ADM2	0.257754	0.838721
ADM5	0.185444	0.318664
ADNP	0.101111	0.444719
ADNP2	-0.29873	0.427429
ADO	-0.207345	0.336461
ADORA1	0.158196	0.164714
ADORA2A	0.181442	0.16909
ADORA2B	0.527958	0.382254
ADORA3	0.429968	0.402815
ADPGK	0.195334	0.565172
ADPRH	0.0726869	0.533363
ADPRHL1	0.120623	0.503827
ADPRM	0.0306451	0.656111
ADPRS	0.0753247	0.426335
ADRA1A	0.535737	0.416219
ADRA1B	0.308908	0.105936
ADRA1D	0.285913	0.610202
ADRA2A	0.397542	0.897873
ADRA2B	-0.0612614	0.231383
ADRA2C	0.147014	0.889739
ADRB1	0.332566	0.872237
ADRB2	0.0970606	0.830044
ADRM1	0.103836	0.341093
ADSL	0.424213	0.255
ADSS1	0.0421326	0.369886
ADSS2	0.155777	0.479699
ADTRP	0.116258	0.363593
AEBP1	0.359543	1.03707
AEBP2	0.140039	0.366271
AEN	-0.216868	0.566442
AFAP1	0.345149	0.420049
AFAP1L1	0.340053	0.381228
AFAP1L2	0.419931	0.613183
AFDN	-0.291025	0.612499
AFF1	-0.0359939	0.485298
AFF2	-0.0859368	0.163028
AFF3	0.243535	1.02829
AFF4	-0.191815	0.526912
AFG1L	0.125742	0.186561
AFG3L2	-0.078384	0.418923
AFMID	0.407253	0.469281
AFTPH	-0.042887	0.446493
AGA	0.470785	0.402044
AGAP1	0.168596	0.455977
AGAP2	0.476914	0.289238
AGAP3	0.213619	0.378584
AGAP4	0.0324681	0.294783
AGAP5	0.0868385	0.178688
AGAP6	0.0796834	0.329813
AGAP9	-0.00778378	0.475575
AGBL2	0.11397	0.200266
AGBL3	-0.089326	0.20793
AGBL4	0.144062	0.133044
AGBL5	0.349194	0.278846
AGER	0.23656	0.543378
AGFG1	0.0751883	0.341087
AGFG2	0.0536685	0.545004
AGGF1	0.206091	0.257567
AGK	0.146027	0.286923
AGL	-0.0887282	0.464685
AGMAT	0.34663	0.53961
AGMO	0.0555748	0.278107
AGO1	0.0492579	0.25386
AGO2	0.360456	0.423693
AGO3	0.360953	0.222266
AGO4	0.179831	0.38542
AGPAT1	0.258929	0.317086
AGPAT2	0.0785726	0.596744
AGPAT3	0.174015	0.390324
AGPAT4	0.512288	0.31749
AGPAT5	-0.0713942	0.52443
AGPS	0.421385	0.449024
AGR2	-0.00667432	1.52501
AGRN	0.0254135	0.680963
AGRP	-0.122873	0.12952
AGT	0.0120748	1.58792
AGTPBP1	0.12415	0.472285
AGTR1	0.231301	1.34533
AGTRAP	0.463984	0.532137
AHCTF1	0.335871	0.32583
AHCY	0.293525	0.573723
AHCYL1	-0.0389582	0.390735
AHCYL2	0.183813	0.43957
AHDC1	0.664379	0.354689
AHI1	0.0861695	0.348597
AHNAK	0.614353	0.645929
AHNAK2	0.611179	0.697589
AHR	0.568674	0.553495
AHRR	0.0344828	0.126185
AHSA1	0.0864509	0.386743
AIDA	0.316697	0.648327
AIF1	0.358622	0.728825
AIF1L	0.524489	0.54504
AIFM1	0.444048	0.286472
AIFM2	0.19352	0.410665
AIFM3	0.199343	0.181325
AIG1	0.351531	0.259462
AIM2	0.562711	0.363173
AIMP1	-0.075004	0.269806
AIMP2	0.299598	0.470337
AIP	-0.183452	0.554342
AIRE	-0.11093	0.0754074
AJAP1	0.367799	0.253009
AJM1	0.406736	0.447636
AJUBA	0.62685	0.523946
AK1	0.00238243	0.335728
AK2	0.170315	0.256408
AK3	-0.0341623	0.390604
AK4	0.365056	0.558682
AK5	0.00805289	0.986404
AK6	0.067884	0.417204
AK7	0.236764	0.334186
AK8	0.165754	0.289579
AK9	-0.0978622	0.256525
AKAP1	0.0476549	0.53804
AKAP10	-0.0726499	0.303587
AKAP11	0.152964	0.542222
AKAP12	0.65973	0.710336
AKAP13	0.363891	0.557564
AKAP17A	0.323241	0.513415
AKAP3	-0.00689527	0.30792
AKAP5	0.336898	0.294158
AKAP6	0.334074	0.234372
AKAP7	0.426496	0.550074
AKAP8	0.169033	0.248091
AKAP8L	0.301932	0.411878
AKAP9	-0.238967	0.58912
AKIP1	-0.0792714	0.300255
AKIRIN1	0.271664	0.568219
AKIRIN2	0.359607	0.32454
AKNA	0.581052	0.483486
AKR1A1	0.473486	0.393644
AKR1B1	0.381622	0.660031
AKR1B10	0.115462	0.207732
AKR1B15	0.0689869	0.0918865
AKR1C1	0.239401	0.516237
AKR1C2	-0.0381658	0.403672
AKR1C3	0.0366611	0.758071
AKR1E2	0.145552	0.370907
AKR7A2	0.285839	0.431132
AKR7A3	0.357783	0.430588
AKT1	0.206541	0.375232
AKT1S1	0.352856	0.35669
AKT2	-0.0515777	0.24451
AKT3	0.182703	0.537877
AKTIP	-0.0912692	0.309378
ALAD	0.14083	0.61665
ALAS1	0.30074	0.497786
ALAS2	0.198517	0.0907994
ALB	0.218796	1.02572
ALCAM	0.105292	0.668016
ALDH16A1	-0.0850205	0.492183
ALDH18A1	0.306271	0.522413
ALDH1A1	0.135518	1.43423
ALDH1A2	0.540396	0.810221
ALDH1A3	0.429375	0.770863
ALDH1B1	0.345614	0.469014
ALDH1L1	0.188357	0.707851
ALDH1L2	0.500608	0.390275
ALDH2	0.401856	0.781058
ALDH3A1	0.218624	0.280775
ALDH3A2	0.249148	0.506564
ALDH3B1	0.461823	0.388792
ALDH4A1	0.382267	0.839372
ALDH5A1	-0.0317351	0.458825
ALDH6A1	0.291039	0.672374
ALDH7A1	0.219343	0.510971
ALDH8A1	-0.0324815	0.167608
ALDH9A1	0.215232	0.487097
ALDOA	0.175046	0.485445
ALDOB	0.187594	0.0962615
ALDOC	0.187635	0.559404
ALG1	0.17194	0.332032
ALG10	0.0599511	0.24764
ALG10B	-0.293922	0.346213
ALG11	-0.118262	0.328405
ALG12	0.185888	0.325964
ALG13	0.240292	0.283202
ALG14	0.261128	0.255976
ALG1L2	0.0374679	0.150695
ALG2	0.320262	0.485602
ALG3	0.413211	0.424944
ALG5	0.543721	0.423353
ALG6	0.227281	0.368676
ALG8	0.321949	0.411281
ALG9	0.027478	0.175683
ALK	-0.188717	0.0497505
ALKAL2	0.245139	0.259634
ALKBH1	-0.152932	0.239583
ALKBH2	0.246856	0.518715
ALKBH3	0.433362	0.286621
ALKBH4	0.0323799	0.370702
ALKBH5	-0.253895	0.325054
ALKBH6	-0.196519	0.23127
ALKBH7	0.36544	0.700988
ALKBH8	-0.0688686	0.308574
ALMS1	0.14184	0.508835
ALOX12	0.0223594	0.21809
ALOX15	0.210728	1.08365
ALOX15B	0.334875	2.39552
ALOX5	0.0421842	0.684423
ALOX5AP	0.347971	0.673416
ALPK1	0.607682	0.3999
ALPK2	0.00873321	0.139136
ALPK3	0.22623	0.43346
ALPL	0.0503836	0.881179
ALS2	0.15826	0.277997
ALS2CL	0.450863	0.476951
ALX4	0.4609	0.340429
ALYREF	0.336983	0.398534
AMACR	0.0746641	1.39764
AMBP	-0.039045	0.321613
AMBRA1	-0.0534969	0.306594
AMD1	0.0422425	0.825116
AMDHD1	0.0194289	0.116148
AMDHD2	0.0127084	0.406491
AMER1	0.324032	0.27042
AMFR	0.124633	0.300552
AMH	0.333366	0.653704
AMHR2	0.101791	0.125017
AMIGO1	0.11128	0.383238
AMIGO2	0.312889	0.69125
AMMECR1	0.208627	0.459717
AMMECR1L	0.127514	0.411496
AMN	0.184312	0.205935
AMN1	-0.312769	0.286854
AMOT	0.558889	0.662356
AMOTL1	-0.0618739	0.781378
AMOTL2	0.542808	0.623382
AMPD2	0.382242	0.297229
AMPD3	0.0860168	0.790752
AMPH	0.316782	0.23003
AMT	0.101554	0.117303
AMY2B	0.200855	0.548101
AMZ1	0.145084	0.0578397
AMZ2	0.180489	0.276357
ANAPC1	0.0230724	0.318466
ANAPC10	-0.0441731	0.19999
ANAPC11	0.34522	0.428584
ANAPC13	0.274122	0.395847
ANAPC15	0.290636	0.316707
ANAPC16	0.0259508	0.332025
ANAPC2	0.124294	0.42463
ANAPC4	0.278029	0.339295
ANAPC5	0.347964	0.285402
ANAPC7	-0.00357014	0.257518
ANG	0.386959	0.857759
ANGEL1	0.219338	0.333183
ANGEL2	-0.11186	0.344917
ANGPT1	0.555144	0.822818
ANGPT2	0.301158	0.511711
ANGPT4	0.0312127	0.142365
ANGPTL1	0.479835	0.662851
ANGPTL2	0.379123	0.80362
ANGPTL3	0.0395379	0.676879
ANGPTL4	0.41415	1.06383
ANGPTL6	0.0693611	0.0981764
ANGPTL8	0.00566194	0.136903
ANK1	0.051614	0.454888
ANK2	0.491537	0.357087
ANK3	0.216789	0.61528
ANKAR	0.0235809	0.247152
ANKDD1A	0.506355	0.348048
ANKDD1B	0.00296806	0.310731
ANKEF1	0.310613	0.346373
ANKFN1	0.0303171	0.12109
ANKFY1	0.0876762	0.435403
ANKH	-0.0278363	0.749449
ANKHD1	0.175683	0.207114
ANKIB1	0.0553197	0.437795
ANKK1	-0.203136	0.422548
ANKLE1	0.211706	0.153109
ANKLE2	0.12129	0.283665
ANKMY1	0.288825	0.228367
ANKMY2	0.19633	0.295
ANKRA2	0.053572	0.4635
ANKRD1	0.265569	0.85051
ANKRD10	0.0902343	0.696672
ANKRD11	0.184726	0.363034
ANKRD12	0.0187528	0.390898
ANKRD13A	0.42321	0.431253
ANKRD13B	0.444794	0.459034
ANKRD13C	-0.133586	0.293053
ANKRD13D	0.122098	0.434139
ANKRD16	0.491894	0.341495
ANKRD17	-0.191641	0.496831
ANKRD18A	-0.0895907	0.301983
ANKRD18B	0.0349917	0.361293
ANKRD2	0.00822178	0.401079
ANKRD22	0.0856485	0.728596
ANKRD23	0.184867	0.248117
ANKRD24	0.103266	0.47162
ANKRD26	-0.20921	0.254245
ANKRD27	0.113813	0.344897
ANKRD28	0.0678316	0.3325
ANKRD29	0.308139	0.803974
ANKRD31	-0.107533	0.0901917
ANKRD33B	0.694189	0.334898
ANKRD34A	-0.0520178	0.353141
ANKRD35	0.582022	0.560984
ANKRD36	-0.118479	0.366451
ANKRD36B	-0.0260477	0.280133
ANKRD36C	0.0404315	0.41875
ANKRD37	0.43141	0.782145
ANKRD39	0.206123	0.328758
ANKRD40	0.388054	0.345658
ANKRD42	-0.0510177	0.25891
ANKRD44	0.657576	0.416441
ANKRD45	0.163731	0.110719
ANKRD46	0.0658329	0.417236
ANKRD49	-0.220672	0.334894
ANKRD50	0.221887	0.606584
ANKRD52	-0.142425	0.566353
ANKRD53	0.0292219	0.242786
ANKRD54	0.237021	0.303014
ANKRD55	0.20721	0.114184
ANKRD6	0.329174	0.401689
ANKRD61	-0.0668744	0.264482
ANKRD65	0.277944	0.663323
ANKRD9	0.0703521	0.527524
ANKS1A	0.274404	0.344889
ANKS1B	0.164491	0.169958
ANKS3	0.464077	0.396552
ANKS6	-0.026214	0.479885
ANKZF1	0.148041	0.449225
ANLN	0.316774	0.534775
ANO1	0.496082	0.773293
ANO10	-0.293922	0.340516
ANO2	0.195187	0.154728
ANO3	-0.0457836	0.192226
ANO4	0.588631	0.537569
ANO5	0.363078	0.620396
ANO6	0.603737	0.676973
ANO7	0.353055	1.22163
ANO8	0.178189	0.491448
ANO9	0.330664	0.564124
ANOS1	0.17453	0.633151
ANP32A	0.348852	0.263245
ANP32B	0.219487	0.440493
ANP32E	0.671008	0.53721
ANPEP	0.295063	2.39471
ANTKMT	0.19689	0.566901
ANTXR1	0.628269	0.798279
ANTXR2	0.32978	0.767553
ANXA1	0.422771	0.94903
ANXA10	-0.194664	0.246213
ANXA11	0.16639	0.429265
ANXA13	-0.0820368	0.227122
ANXA2	0.413611	0.811846
ANXA2R	-0.0321272	0.640942
ANXA3	0.412472	0.693595
ANXA4	0.358639	0.346903
ANXA5	0.187382	0.452917
ANXA6	0.589598	0.812585
ANXA7	0.029944	0.393694
ANXA8	0.285973	0.366842
ANXA9	-0.0975911	0.795205
AOAH	0.454782	0.512598
AOC1	0.325293	1.63663
AOC2	-0.216916	0.364163
AOC3	0.550206	0.905404
AOPEP	0.497269	0.469004
AOX1	0.588225	0.964528
AP1AR	-0.0319563	0.427168
AP1B1	0.402433	0.400952
AP1G1	0.348677	0.436018
AP1G2	-0.0941286	0.477593
AP1M1	-0.0681471	0.220803
AP1M2	0.564552	0.550783
AP1S1	0.363218	0.47066
AP1S2	0.238083	0.344515
AP1S3	0.182697	0.404383
AP2A1	-0.060737	0.315105
AP2A2	-0.217964	0.246797
AP2B1	0.0118217	0.350216
AP2M1	-0.241107	0.302449
AP2S1	0.286842	0.737466
AP3B1	0.401512	0.376663
AP3B2	0.160973	0.233915
AP3D1	0.0240685	0.365352
AP3M1	0.14164	0.507611
AP3M2	-0.120503	0.399934
AP3S1	0.0445549	0.337349
AP3S2	0.143924	0.243189
AP4B1	0.0522936	0.2698
AP4E1	0.281901	0.264189
AP4M1	0.264438	0.323154
AP4S1	0.432432	0.166972
AP5B1	0.270386	0.43233
AP5M1	0.10619	0.27772
AP5S1	-0.0940473	0.260392
AP5Z1	0.025527	0.352912
APAF1	-0.0599034	0.454338
APBA1	-0.0239757	0.335376
APBA2	0.418075	0.522132
APBA3	0.0717272	0.270416
APBB1	0.472173	0.520683
APBB1IP	0.52112	0.544181
APBB2	0.516386	0.367631
APBB3	0.218623	0.458503
APC	0.0227412	0.489643
APC2	0.303096	0.196531
APCDD1	0.134222	0.818736
APCDD1L	0.175199	0.130853
APEH	0.385065	0.43223
APEX1	0.319541	0.522442
APEX2	0.114927	0.365016
APH1A	-0.104842	0.412819
APH1B	0.267126	0.429836
API5	0.155805	0.305279
APIP	0.154688	0.373792
APLF	0.613418	0.308059
APLN	0.294754	0.846509
APLNR	0.204476	0.618347
APLP1	-0.226173	0.594523
APLP2	0.333194	0.510924
APMAP	0.429166	0.473158
APOA1	0.0830146	0.298035
APOB	0.0964213	0.114668
APOBEC2	-0.103271	0.367001
APOBEC3A	-0.0917733	0.203467
APOBEC3B	-0.0869865	0.324543
APOBEC3C	0.539633	0.874361
APOBEC3D	0.418475	0.0930926
APOBEC3F	0.261957	0.489238
APOBEC3G	0.508623	0.50174
APOBEC3H	0.304506	0.283661
APOBR	0.0999105	0.489196
APOC1	0.193538	1.09788
APOD	0.0392123	1.31316
APOE	0.277918	1.1584
APOF	0.23433	1.112
APOL1	0.474488	0.810269
APOL2	0.259089	0.427206
APOL3	0.325876	0.623908
APOL4	0.0288414	1.33751
APOL6	0.58207	0.595948
APOLD1	0.159359	0.788444
APOM	-0.0418943	0.338315
APOO	0.347278	0.364612
APOOL	0.0134107	0.504276
APP	-0.0464488	0.772358
APPBP2	-0.0687775	0.376235
APPL1	0.184233	0.358302
APPL2	-0.0957923	0.575933
APRT	0.235042	0.649253
APTR	0.230256	0.31116
APTX	0.246029	0.189897
AQP1	0.117906	0.836801
AQP11	0.246694	0.867969
AQP3	0.269686	1.06426
AQP5	0.263416	0.365123
AQP6	0.210619	0.126792
AQP7	-0.0633089	0.167363
AQP8	0.10146	0.191831
AQP9	0.317609	0.275548
AQR	-0.0852761	0.353435
AR	0.115241	0.569464
ARAF	0.244421	0.353409
ARAP1	0.580996	0.340359
ARAP2	-0.0615733	0.37541
ARAP3	0.229244	0.512212
ARC	0.0796697	0.495167
ARCN1	0.039364	0.446177
AREG	0.102387	0.994402
AREL1	0.124157	0.356341
ARF1	0.313454	0.402535
ARF3	-0.222803	0.495564
ARF4	0.289559	0.48389
ARF5	0.190294	0.487377
ARF6	0.472986	0.526485
ARFGAP1	0.170316	0.446429
ARFGAP2	0.216084	0.239234
ARFGAP3	0.468544	0.467844
ARFGEF1	0.148554	0.359384
ARFGEF2	0.0580705	0.542051
ARFGEF3	0.300313	0.812603
ARFIP1	-0.298455	0.410033
ARFIP2	0.499553	0.418856
ARFRP1	0.0816929	0.448253
ARG1	-0.181853	0.268351
ARG2	0.382021	1.16898
ARGLU1	0.103302	0.73483
ARHGAP1	0.258247	0.36569
ARHGAP10	0.401909	0.712936
ARHGAP11A	0.245861	0.337987
ARHGAP11B	-0.0875158	0.112037
ARHGAP12	0.0266686	0.510621
ARHGAP15	0.606117	0.396696
ARHGAP17	0.326881	0.283298
ARHGAP18	0.046725	0.597945
ARHGAP19	-0.0991174	0.317546
ARHGAP20	0.543462	0.451364
ARHGAP21	0.116605	0.414126
ARHGAP22	0.481816	0.250739
ARHGAP23	0.644704	0.577531
ARHGAP24	0.381744	0.28817
ARHGAP25	0.610738	0.449529
ARHGAP26	0.1489	0.492986
ARHGAP27	-0.000923675	0.430112
ARHGAP28	0.180014	0.666273
ARHGAP29	-0.0604869	0.590951
ARHGAP30	0.501647	0.538648
ARHGAP31	0.448265	0.504904
ARHGAP32	0.159149	0.567587
ARHGAP33	0.43676	0.488423
ARHGAP35	0.310667	0.381715
ARHGAP39	0.35763	0.519692
ARHGAP4	0.545794	0.518543
ARHGAP40	0.304395	0.579017
ARHGAP42	0.228233	0.32479
ARHGAP44	0.204204	0.327084
ARHGAP45	0.444893	0.561985
ARHGAP5	0.323004	0.58489
ARHGAP6	-0.0632442	0.619582
ARHGAP8	-0.390883	0.452647
ARHGAP9	0.563057	0.466022
ARHGDIA	0.220676	0.436288
ARHGDIB	0.314577	0.877397
ARHGDIG	0.465236	0.767601
ARHGEF1	0.241576	0.377423
ARHGEF10	0.150702	0.1762
ARHGEF10L	0.566261	0.33026
ARHGEF11	0.281961	0.438541
ARHGEF12	-0.182751	0.520593
ARHGEF15	0.26386	0.436896
ARHGEF16	0.305534	0.505516
ARHGEF17	0.631138	0.498717
ARHGEF18	0.0301551	0.524409
ARHGEF19	0.264517	0.612474
ARHGEF2	0.758007	0.418415
ARHGEF25	0.511816	0.717299
ARHGEF26	0.375795	0.751257
ARHGEF28	0.493425	0.446933
ARHGEF3	0.101217	0.568759
ARHGEF33	0.16125	0.15241
ARHGEF35	0.124104	0.589572
ARHGEF37	0.292319	0.588523
ARHGEF38	0.200736	0.619685
ARHGEF39	0.228994	0.215084
ARHGEF4	0.184745	0.355526
ARHGEF40	0.567534	0.476951
ARHGEF5	0.0565982	0.381819
ARHGEF6	0.595938	0.522671
ARHGEF7	0.111456	0.506948
ARHGEF9	0.109244	0.295112
ARID1A	0.0102475	0.460964
ARID1B	0.199984	0.463331
ARID2	-0.0715327	0.378212
ARID3A	-0.0385779	0.449622
ARID3B	0.0744442	0.247482
ARID3C	-0.288305	0.163957
ARID4A	0.0753236	0.378635
ARID4B	0.00237583	0.398075
ARID5A	0.280306	0.794817
ARID5B	0.0230434	0.55379
ARIH1	0.0134717	0.283783
ARIH2	0.0806903	0.350524
ARL1	0.367484	0.336786
ARL10	0.747488	0.257198
ARL11	0.401709	0.170943
ARL13A	0.141725	0.210152
ARL13B	-0.0602087	0.403487
ARL14EP	0.194614	0.236559
ARL15	-0.012932	0.458041
ARL16	-0.0434813	0.513504
ARL17A	-0.290047	0.144285
ARL17B	0.104075	0.177989
ARL2	-0.230904	0.625538
ARL2BP	0.229543	0.606567
ARL3	-0.0220986	0.426556
ARL4A	0.110248	0.561524
ARL4C	0.719104	0.539724
ARL4D	0.58733	0.670487
ARL5A	-0.147847	0.403505
ARL5B	-0.0981164	0.594615
ARL6	0.182764	0.332022
ARL6IP1	0.396878	0.490376
ARL6IP4	-0.0182497	0.178209
ARL6IP5	0.367485	0.466146
ARL6IP6	0.0912763	0.430801
ARL8A	-0.0992935	0.408123
ARL8B	0.0798555	0.327288
ARL9	0.0907389	0.317066
ARMC1	0.199021	0.363866
ARMC10	0.105753	0.264516
ARMC12	0.0642562	0.423361
ARMC2	0.200344	0.213972
ARMC5	0.0883868	0.450833
ARMC6	0.281984	0.39767
ARMC7	-0.0126191	0.44098
ARMC8	0.0328733	0.291453
ARMC9	-0.142968	0.229249
ARMCX1	0.582534	0.909507
ARMCX2	0.397816	0.769107
ARMCX3	0.316351	0.469301
ARMCX4	0.402597	0.421853
ARMCX5	0.362082	0.277923
ARMCX6	0.252265	0.402728
ARMH1	0.2872	0.374409
ARMH3	0.219518	0.274614
ARMH4	0.385857	0.278172
ARMT1	-0.128694	0.386552
ARNT	0.144171	0.340153
ARNT2	0.110305	0.510394
ARPC1A	0.0156227	0.478902
ARPC1B	0.227589	0.187229
ARPC2	0.15188	0.310219
ARPC3	0.327889	0.339499
ARPC4	-0.0770673	0.480305
ARPC5	0.0629403	0.303673
ARPC5L	0.13286	0.542901
ARPIN	-0.07305	0.377304
ARPP19	-0.0553964	0.349272
ARR3	-0.129257	0.167946
ARRB1	0.470565	0.372583
ARRB2	0.428383	0.410474
ARRDC1	-0.248238	0.537736
ARRDC2	0.329024	0.661059
ARRDC3	0.474557	0.696536
ARRDC4	-0.023001	0.519147
ARRDC5	0.338931	0.208075
ARSA	0.299007	0.561987
ARSB	0.280048	0.32015
ARSD	0.349748	0.462798
ARSG	0.12051	0.363801
ARSI	0.507616	0.29308
ARSJ	0.529836	0.50556
ARSK	-0.16098	0.402526
ARSL	-0.182154	0.240574
ART3	-0.248859	0.333287
ART4	0.225818	0.505421
ART5	0.159373	0.327134
ARTN	-0.197464	0.392855
ARV1	0.216359	0.315528
ARVCF	0.530264	0.542243
ASAH1	0.320216	0.527161
ASAH2	-0.0193941	0.108909
ASAH2B	-0.0749506	0.235301
ASAP1	0.671466	0.463669
ASAP2	0.241427	0.556172
ASAP3	0.193646	0.499537
ASB1	0.43695	0.275007
ASB12	0.0902902	0.171975
ASB13	0.243505	0.466803
ASB14	-0.0148143	0.148791
ASB16	0.170048	0.274789
ASB2	0.481022	0.917537
ASB3	-0.220419	0.409547
ASB4	0.135969	0.0803042
ASB6	-0.0556032	0.268269
ASB7	-0.0335969	0.272202
ASB8	0.12048	0.255002
ASB9	0.2447	0.69717
ASCC1	0.0792296	0.32526
ASCC2	0.161878	0.272348
ASCC3	0.454803	0.458623
ASCL2	0.100935	0.788672
ASCL5	0.278644	0.136773
ASF1A	-0.209346	0.396796
ASF1B	0.279275	0.697044
ASGR1	0.0209705	0.201344
ASGR2	0.102584	0.153419
ASH1L	0.29971	0.464532
ASH2L	-0.0717971	0.372076
ASIC1	0.132092	0.425202
ASIC2	0.139965	0.389582
ASIC3	0.210501	0.505946
ASIC4	0.0157826	0.0845121
ASIP	-0.173938	0.170302
ASL	-0.0115786	0.347934
ASMT	0.248673	0.0971671
ASMTL	0.275446	0.359969
ASNS	0.122034	0.136446
ASNSD1	0.0479573	0.242803
ASPA	0.429581	0.33613
ASPDH	-0.159823	0.155923
ASPG	0.00400752	0.170353
ASPH	0.507865	0.520085
ASPHD1	0.220596	0.639488
ASPHD2	0.0249763	0.398936
ASPM	0.373054	0.330289
ASPN	0.228523	0.968233
ASPRV1	0.060145	0.244814
ASPSCR1	0.0935939	0.437835
ASRGL1	0.182812	0.803567
ASS1	-0.0452125	0.948107
ASTE1	0.180578	0.228407
ASTN1	-0.0798244	0.184571
ASTN2	0.364988	0.682842
ASXL1	0.151678	0.380272
ASXL2	0.155961	0.404219
ASXL3	0.113238	0.205577
ATAD1	0.0950166	0.724385
ATAD2	0.0458599	0.587551
ATAD2B	0.238645	0.300607
ATAD3A	0.0981635	0.494262
ATAD3B	0.0947471	0.538974
ATAD3C	0.0963767	0.487577
ATAD5	0.297183	0.202179
ATAT1	0.439074	0.506028
ATE1	0.0635516	0.417462
ATF1	-0.248792	0.448539
ATF2	-0.186087	0.40704
ATF3	0.406068	1.69617
ATF4	0.157174	0.602439
ATF5	0.244269	0.6843
ATF6	0.277199	0.401105
ATF6B	-0.0448832	0.457211
ATF7	0.391316	0.291506
ATF7IP	0.103833	0.471476
ATF7IP2	-0.259309	0.506993
ATG10	0.226493	0.238391
ATG101	0.135159	0.396596
ATG12	0.0117462	0.287403
ATG13	0.0981944	0.316551
ATG14	0.0122292	0.299243
ATG16L1	-0.103281	0.29997
ATG16L2	0.299776	0.460433
ATG2A	-0.0499173	0.33723
ATG2B	-0.362372	0.421829
ATG3	0.218167	0.244713
ATG4A	0.315048	0.401853
ATG4B	-0.0991952	0.35429
ATG4C	-0.0799413	0.362198
ATG4D	0.0698495	0.483338
ATG5	0.024464	0.408203
ATG7	-0.144172	0.23533
ATG9A	0.0255961	0.611718
ATG9B	0.131656	0.378202
ATIC	0.0749114	0.411324
ATL1	0.0438033	0.429836
ATL2	0.451234	0.403651
ATL3	-0.0344452	0.404771
ATM	0.042566	0.485483
ATMIN	0.296817	0.377779
ATN1	0.477426	0.581093
ATOH7	0.117324	0.146211
ATOH8	0.363072	0.625087
ATOX1	-0.0259465	0.648619
ATP10A	-0.0126138	0.320359
ATP10B	-0.0786685	0.0447813
ATP10D	0.50357	0.478094
ATP11A	0.149271	0.972193
ATP11B	-0.0455424	0.704518
ATP11C	0.33947	0.385059
ATP13A1	0.168014	0.312553
ATP13A2	0.338739	0.458771
ATP13A3	-0.0830395	0.507066
ATP13A4	-0.0034114	0.142674
ATP1A1	0.168809	0.909722
ATP1A2	0.526357	1.06502
ATP1A3	0.0458888	0.0462741
ATP1A4	0.249096	0.149352
ATP1B1	0.606084	0.778899
ATP1B2	0.468624	0.446681
ATP1B3	-0.169579	0.442482
ATP23	-0.136348	0.262864
ATP2A1	0.142769	0.491457
ATP2A2	0.556739	0.507495
ATP2A3	0.312753	0.831467
ATP2B1	0.0263032	0.504136
ATP2B2	-0.20922	0.0666068
ATP2B4	0.653816	0.950212
ATP2C1	0.199714	0.612924
ATP2C2	0.313444	0.679663
ATP5F1A	0.00270927	0.436422
ATP5F1B	0.171503	0.508044
ATP5F1C	0.0682743	0.322508
ATP5F1D	0.0187403	0.700647
ATP5F1E	0.0710161	0.544851
ATP5IF1	0.464394	0.471625
ATP5MC1	0.1761	0.455966
ATP5MC2	0.303882	0.431588
ATP5MC3	-0.11394	0.49337
ATP5ME	0.254079	0.798551
ATP5MF	0.263214	0.553996
ATP5MG	0.00760178	0.544201
ATP5MGL	-0.0269627	0.148791
ATP5PB	0.366694	0.355834
ATP5PD	0.12658	0.428198
ATP5PF	0.148736	0.4197
ATP5PO	0.0847557	0.597418
ATP6AP1	0.392993	0.454389
ATP6AP2	0.0825457	0.360238
ATP6V0A1	0.13158	0.331989
ATP6V0A2	-0.0839245	0.354641
ATP6V0B	0.306241	0.527926
ATP6V0C	0.062445	0.171318
ATP6V0D1	0.226475	0.418935
ATP6V0D2	0.221775	0.259758
ATP6V0E1	0.0564174	0.421667
ATP6V0E2	0.580167	0.642496
ATP6V1A	0.191621	0.473079
ATP6V1B2	0.118029	0.421724
ATP6V1C1	-0.0828661	0.381077
ATP6V1C2	0.0620859	0.586966
ATP6V1D	0.287639	0.320587
ATP6V1E1	0.135823	0.322381
ATP6V1E2	0.0843994	0.275712
ATP6V1F	0.0249274	0.537193
ATP6V1G1	0.587733	0.421279
ATP6V1G2	0.0203025	0.245348
ATP6V1H	0.226334	0.363877
ATP7A	-0.362264	0.465726
ATP7B	0.0159451	0.467206
ATP8A1	0.0232658	0.693454
ATP8A2	0.369599	0.963019
ATP8B1	0.320496	0.574513
ATP8B2	0.271504	0.724071
ATP8B3	0.142193	0.0867593
ATP8B4	0.322689	0.646664
ATP9A	-0.0335303	0.534116
ATP9B	-0.0174248	0.26386
ATPAF1	0.33513	0.263521
ATPAF2	0.321852	0.25188
ATPSCKMT	0.393375	0.303322
ATR	-0.0653917	0.414497
ATRAID	0.152152	0.34674
ATRIP	0.27856	0.28798
ATRN	-0.0709295	0.390206
ATRNL1	0.0223665	0.417498
ATRX	-0.075282	0.482313
ATXN1	0.143695	0.526375
ATXN10	0.135432	0.344039
ATXN1L	0.32993	0.408796
ATXN2	-0.019729	0.514166
ATXN2L	0.332397	0.514218
ATXN3	0.124943	0.236514
ATXN7	0.0185555	0.414586
ATXN7L1	-0.0346257	0.328251
ATXN7L2	0.522386	0.230573
ATXN7L3	-0.113351	0.403177
ATXN7L3B	0.0899887	0.429564
AUH	0.114281	0.761619
AUNIP	0.312873	0.206411
AUP1	0.197223	0.449935
AURKA	0.423827	0.496857
AURKAIP1	0.308454	0.598422
AURKB	0.244904	0.595909
AURKC	-0.11529	0.250245
AUTS2	0.539388	0.394829
AVEN	0.0747288	0.363555
AVIL	0.105387	0.284776
AVL9	0.249862	0.389495
AVPI1	0.447884	0.694564
AVPR1A	0.308236	0.440737
AVPR2	0.186017	0.293791
AXDND1	-0.088245	0.189904
AXIN1	0.287713	0.31262
AXIN2	0.298218	0.533357
AXL	0.597633	0.723465
AZGP1	0.450502	1.52633
AZI2	-0.15036	0.345085
AZIN1	0.0683981	0.554857
AZIN2	0.448713	0.216348
AZU1	-0.090644	0.22501
B2M	0.516081	0.650787
B3GALNT1	0.250133	0.510489
B3GALNT2	0.422055	0.314678
B3GALT1	-0.0468132	0.17169
B3GALT2	0.463248	0.591953
B3GALT4	0.265352	0.502672
B3GALT5	0.181755	0.242318
B3GALT6	0.403754	0.537123
B3GAT1	-0.0156118	0.923018
B3GAT2	0.0730696	0.0772101
B3GAT3	0.14374	0.493884
B3GLCT	0.0925943	0.298157
B3GNT2	0.291847	0.507039
B3GNT4	0.0535411	0.168405
B3GNT5	0.270625	0.592804
B3GNT7	0.270709	0.413006
B3GNT8	0.532663	0.352397
B3GNT9	0.456123	0.691944
B3GNTL1	0.350333	0.230863
B4GALNT1	0.386959	0.333129
B4GALNT3	0.342954	0.472963
B4GALNT4	0.368164	0.922765
B4GALT1	0.295868	0.528506
B4GALT2	0.0464328	0.34534
B4GALT3	0.222017	0.447698
B4GALT4	-0.0875454	0.308227
B4GALT5	0.36015	0.445434
B4GALT6	0.150508	0.364185
B4GALT7	-0.0818836	0.371015
B4GAT1	-0.0862947	0.431614
B9D1	0.33163	0.31587
B9D2	0.0967617	0.451987
BAALC	0.273914	0.179964
BAAT	0.0526451	0.116038
BABAM1	0.018778	0.475728
BABAM2	0.037004	0.314466
BACE1	0.472405	0.31304
BACE2	0.209075	0.872678
BACH1	-0.107381	0.508019
BACH2	0.593724	0.225099
BAD	0.311099	0.452669
BAG1	-0.0347363	0.392983
BAG2	0.277013	0.464565
BAG3	0.145134	0.655766
BAG4	-0.146356	0.446025
BAG5	-0.0531292	0.329242
BAG6	0.156321	0.280783
BAHCC1	0.216274	0.353735
BAHD1	0.136186	0.342618
BAIAP2	0.271628	0.529841
BAIAP2L1	0.363159	0.43709
BAIAP2L2	0.319242	0.954728
BAIAP3	0.371533	0.624116
BAK1	0.0649861	0.390284
BAMBI	0.197297	1.14909
BANF1	0.0469186	0.671871
BANK1	0.132972	1.23183
BANP	0.148287	0.243708
BAP1	0.2588	0.291523
BARD1	0.27135	0.366429
BARX2	0.200537	0.694084
BASP1	0.00133095	1.05686
BATF	0.420329	0.750757
BATF2	0.3814	0.421341
BATF3	0.0693823	0.361448
BAX	-0.133672	0.532965
BAZ1A	0.0523194	0.454013
BAZ1B	0.200281	0.325818
BAZ2A	0.106058	0.528183
BAZ2B	0.16483	0.378237
BBC3	0.150525	0.511623
BBIP1	-0.289503	0.346715
BBOF1	-0.0296066	0.283457
BBOX1	0.159227	0.390442
BBS1	0.369824	0.201457
BBS10	-0.0932426	0.457616
BBS12	0.03805	0.331408
BBS2	0.217107	0.409962
BBS4	0.25455	0.733488
BBS5	0.314645	0.249298
BBS7	0.00800119	0.297081
BBS9	0.133407	0.236631
BBX	0.255629	0.49303
BCAM	0.454778	0.758501
BCAN	-0.00376395	0.170475
BCAP29	-0.123412	0.507572
BCAP31	0.174292	0.506611
BCAR1	0.0217988	0.383403
BCAR3	0.232488	0.437955
BCAS1	0.490991	0.846512
BCAS2	0.222909	0.419707
BCAS3	0.296349	0.306073
BCAS4	0.236281	0.401561
BCAT1	-0.00319585	0.467601
BCAT2	0.249354	0.545059
BCCIP	0.198802	0.379696
BCDIN3D	0.322275	0.238336
BCHE	0.219472	0.704233
BCKDHA	0.131947	0.111765
BCKDHB	0.0378368	0.637347
BCKDK	0.171989	0.374634
BCL10	-0.0533779	0.350701
BCL11A	0.402471	0.413966
BCL11B	0.596572	0.332511
BCL2	0.639999	0.524408
BCL2A1	0.333287	0.581325
BCL2L1	0.25277	0.337259
BCL2L10	0.394303	0.500743
BCL2L11	-0.155655	0.415385
BCL2L12	0.20911	0.514097
BCL2L13	0.317875	0.314959
BCL2L14	-0.115641	0.484348
BCL2L15	-0.0425138	0.186974
BCL2L2	0.271473	0.468261
BCL3	-0.0860191	1.00012
BCL6	0.468677	0.603122
BCL6B	0.281664	0.487899
BCL7A	0.37943	0.366869
BCL7B	0.136275	0.293887
BCL7C	-0.0441231	0.404376
BCL9	0.302465	0.575256
BCL9L	0.21181	0.686229
BCLAF1	-0.0434041	0.339277
BCLAF3	0.0103481	0.325087
BCO1	0.297194	0.282049
BCO2	0.14152	0.247042
BCOR	0.0759736	0.655672
BCORL1	0.119605	0.394724
BCR	-0.304912	0.333816
BCS1L	0.365891	0.412643
BDH1	0.425964	0.519944
BDH2	0.496971	0.517521
BDKRB1	0.108715	0.101801
BDKRB2	0.419707	0.419431
BDNF	0.607283	0.19354
BDP1	0.0177629	0.548946
BEAN1	0.138805	0.150498
BECN1	0.0879152	0.443425
BEGAIN	0.317438	0.217288
BEND3	0.356774	0.522037
BEND4	0.101834	0.975225
BEND5	0.412823	0.397072
BEND6	0.460235	0.247413
BEND7	0.447526	0.331859
BEST1	0.137126	0.208372
BEST4	0.190526	0.134145
BET1	0.141171	0.312124
BET1L	-0.165694	0.287124
BEX1	0.320148	1.00959
BEX2	-0.0160601	0.756571
BEX3	0.0920483	0.527123
BEX4	0.00977521	0.565104
BEX5	0.185638	1.00326
BFAR	0.289819	0.310575
BFSP1	-0.0901774	0.217894
BFSP2	0.116059	0.0677932
BGLAP	0.0804882	0.361941
BGN	0.328791	0.894536
BHLHA15	0.269056	1.16486
BHLHE22	0.0342909	0.173797
BHLHE40	0.398502	1.06544
BHLHE41	0.269623	0.809864
BHMT	0.0305348	0.0659488
BHMT2	0.574059	0.611867
BICC1	0.103456	0.600426
BICD1	0.349524	0.753975
BICD2	0.364124	0.370043
BICDL1	0.272504	0.518286
BICDL2	-0.242685	0.614941
BICRA	0.213623	0.404305
BICRAL	-0.052687	0.416159
BID	-0.0333489	0.32337
BIK	0.523045	0.701378
BIN1	0.00586998	0.587979
BIN2	0.550867	0.50848
BIN3	0.474383	0.32657
BIRC2	0.1245	0.402176
BIRC3	0.436763	0.760592
BIRC5	0.349224	0.732356
BIRC6	-0.150275	0.427024
BIRC7	0.160627	0.200293
BISPR	0.495915	0.347357
BIVM	0.297659	0.27805
BLACAT1	0.414354	0.075933
BLCAP	-0.137997	0.324337
BLK	0.375149	0.350336
BLM	0.201202	0.232757
BLMH	0.310982	0.355147
BLNK	-0.0994311	0.433948
BLOC1S1	0.0102699	0.67807
BLOC1S2	-0.0410709	0.473315
BLOC1S3	0.033485	0.310575
BLOC1S4	0.21958	0.461719
BLOC1S5	-0.0951129	0.264116
BLOC1S6	0.0488674	0.433479
BLVRA	0.0911547	0.488418
BLVRB	0.288769	0.571167
BLZF1	0.103794	0.351694
BMERB1	0.408316	0.690529
BMF	-0.117943	0.636678
BMI1	-0.524494	0.448247
BMP1	0.530087	0.464069
BMP2	0.407085	0.503139
BMP2K	0.205709	0.391454
BMP4	0.534467	0.730041
BMP5	0.348918	0.866072
BMP6	0.40727	0.814564
BMP7	0.223559	0.841301
BMP8A	0.0383437	0.431519
BMP8B	0.16113	0.445775
BMPER	0.355059	0.546635
BMPR1A	0.0131751	0.423223
BMPR1B	0.324152	0.738973
BMPR2	0.0827988	0.464835
BMS1	0.00459435	0.31797
BMS1P4	-0.0496628	0.173251
BMX	0.204556	0.487308
BNC1	0.236166	0.151108
BNC2	0.587805	0.491207
BNIP1	0.364205	0.299877
BNIP2	0.57916	0.359748
BNIP3	0.2964	0.47214
BNIP3L	0.322916	0.480731
BNIPL	0.372192	0.646435
BOC	0.630692	0.659196
BOD1	0.158038	0.329898
BOD1L1	0.0508971	0.484908
BOK	-0.0911339	0.662943
BOLA1	0.163608	0.433056
BOLA2B	-0.0730226	0.237628
BOLA3	0.467867	0.331963
BOP1	0.215567	0.65589
BORA	-0.0141752	0.215974
BORCS5	-0.0101969	0.242222
BORCS6	0.0650492	0.469846
BORCS7	-0.0463906	0.496495
BORCS8	-0.0215092	0.352581
BPGM	-0.361188	0.435161
BPHL	0.295625	0.351122
BPI	-0.12707	0.138484
BPNT1	0.121312	0.4658
BPNT2	0.1146	0.410118
BPTF	0.116254	0.412481
BRAF	0.0996251	0.394672
BRAP	-0.0819104	0.200035
BRAT1	0.180801	0.405581
BRCA1	0.0963146	0.32586
BRCA2	0.19552	0.163499
BRCC3	0.207792	0.500826
BRD1	0.0623914	0.418768
BRD2	0.339372	0.374778
BRD3	0.122203	0.583798
BRD3OS	0.275929	0.304659
BRD4	0.228491	0.303349
BRD7	0.383768	0.220247
BRD8	0.3465	0.330355
BRD9	0.424644	0.228728
BRF1	0.318252	0.226892
BRF2	-0.113583	0.377914
BRI3	0.155895	0.50344
BRI3BP	0.277762	0.499629
BRICD5	0.154804	0.438711
BRINP1	0.0560558	0.640589
BRINP2	-0.0236585	0.0805305
BRIP1	0.269878	0.196736
BRIX1	0.290989	0.285819
BRK1	0.232684	0.406339
BRMS1	-0.101478	0.496419
BRMS1L	0.0274535	0.29092
BROX	-0.292454	0.417441
BRPF1	0.261252	0.310941
BRPF3	0.0363525	0.612767
BRSK1	0.000899487	0.643934
BRSK2	0.345584	0.769155
BRWD1	-0.152474	0.367913
BRWD3	0.199906	0.327724
BSCL2	0.311258	0.200219
BSDC1	0.453454	0.353823
BSG	-0.00187552	0.496444
BSN	0.352346	0.136114
BSPRY	-0.130179	0.590932
BST1	0.401033	0.270316
BST2	0.416815	1.04915
BTAF1	0.0861201	0.573189
BTBD1	-0.149914	0.345815
BTBD10	-0.0592184	0.295906
BTBD16	-0.21249	0.225892
BTBD18	-0.0601109	0.0444794
BTBD19	0.621898	0.361626
BTBD2	0.336921	0.327072
BTBD3	0.465284	0.374735
BTBD6	0.193262	0.402065
BTBD7	0.200338	0.326758
BTBD8	-0.235341	0.486822
BTBD9	0.186075	0.373042
BTC	0.0204367	0.433857
BTD	0.54122	0.416521
BTF3	0.33687	0.412874
BTF3L4	0.255089	0.269928
BTG1	0.382176	0.526614
BTG2	0.331772	1.12734
BTG3	0.327051	0.627216
BTK	0.64522	0.396798
BTLA	0.348922	0.279259
BTN2A1	0.515691	0.347903
BTN2A2	0.522834	0.400851
BTN3A1	0.50996	0.502377
BTN3A2	0.481274	0.663514
BTN3A3	0.483655	0.548748
BTNL8	-0.0240522	0.0510971
BTNL9	-0.0392175	0.431633
BTRC	0.135393	0.402281
BUB1	0.321265	0.476697
BUB1B	0.245168	0.453721
BUB3	0.267125	0.345022
BUD13	-0.0816265	0.345807
BUD23	0.122623	0.353491
BUD31	0.0692596	0.341431
BYSL	0.288099	0.473091
BZW1	0.191054	0.415469
BZW2	0.186834	0.508818
C10orf143	0.329992	0.190008
C10orf55	0.177077	0.0541665
C10orf67	-0.170982	0.0575893
C10orf88	-0.0839826	0.363098
C11orf16	0.162963	0.161125
C11orf21	0.486717	0.19697
C11orf24	-0.173094	0.349409
C11orf42	0	0.121613
C11orf54	-0.0472329	0.409778
C11orf58	0.0209497	0.234622
C11orf65	-0.194149	0.101801
C11orf68	-0.266968	0.453113
C11orf71	0.0101196	0.57516
C11orf91	0.252652	0.0892539
C11orf96	0.166802	1.13555
C12orf42	0.128065	0.067497
C12orf43	0.0599596	0.165326
C12orf56	-0.0460548	0.505643
C12orf57	0.22586	0.72073
C12orf60	0.229276	0.504176
C12orf71	0	0.07871
C12orf75	0.471593	0.880775
C12orf76	0.177856	0.257916
C13orf46	0.115875	0.585048
C14orf119	0.151738	0.282866
C14orf132	0.202481	0.606958
C14orf28	0.0626532	0.240465
C14orf93	-0.032108	0.300028
C15orf39	0.0814318	0.466888
C15orf40	0.0498375	0.190679
C15orf48	0.0589387	1.63992
C15orf61	0.288114	0.254858
C15orf62	0.252406	0.311614
C16orf54	0.538763	0.551797
C16orf74	0.539173	0.463245
C16orf86	0.198439	0.354997
C16orf87	0.189272	0.315578
C16orf89	0.457353	0.642477
C16orf95	-0.147925	0.15125
C16orf96	0.110468	0.121509
C17orf100	0.132778	0.40815
C17orf107	0.000217574	0.32459
C17orf113	0.0306053	0.338051
C17orf58	0.0249289	0.620935
C17orf67	0.197851	0.280282
C17orf75	-0.0699956	0.284336
C17orf78	0.0895818	0.107711
C17orf99	0.072762	0.0811873
C18orf21	-0.0802277	0.393691
C18orf32	-0.10729	0.212776
C18orf54	0.190803	0.18197
C19orf12	0.0343416	0.29301
C19orf18	0.0683678	0.612779
C19orf25	-0.00573754	0.365528
C19orf38	0.231315	0.340789
C19orf44	0.318864	0.211429
C19orf47	-0.157001	0.361454
C19orf53	-0.0773838	0.550951
C19orf67	0.0569754	0.109128
C19orf73	-0.0666226	0.572107
C19orf81	0.148154	0.945237
C19orf84	0.0571698	0.078397
C1D	0.180784	0.329588
C1GALT1	0.0290433	0.339929
C1GALT1C1	0.615069	0.349753
C1GALT1C1L	0.214877	0.346654
C1QA	0.300202	0.853517
C1QB	0.368554	0.823605
C1QBP	0.25149	0.435313
C1QC	0.396221	0.779848
C1QL1	0.29578	0.392359
C1QL3	-0.198618	0.406012
C1QL4	0.173798	0.135776
C1QTNF1	0.350142	0.882876
C1QTNF12	-0.0302654	0.246856
C1QTNF2	0.23183	0.457059
C1QTNF3	0.182358	0.963325
C1QTNF4	-0.024784	0.319904
C1QTNF6	0.238615	0.3918
C1QTNF7	0.534235	0.691423
C1R	0.405092	1.07356
C1RL	0.239866	0.65706
C1S	0.493008	1.10938
C1orf115	0.0022546	0.881426
C1orf116	0.379619	0.573312
C1orf122	0.248833	0.600973
C1orf127	0.112584	0.109565
C1orf131	0.0548597	0.315862
C1orf146	0.00310344	0.0848522
C1orf159	0.292812	0.341191
C1orf162	0.416215	0.416088
C1orf174	0.12826	0.33165
C1orf198	0.297235	0.347883
C1orf21	0.0770455	0.575128
C1orf210	0.208411	0.60487
C1orf216	-0.266276	0.419461
C1orf220	0.080173	0.249858
C1orf226	-0.100924	0.582779
C1orf35	0.245294	0.386294
C1orf43	0.239999	0.48829
C1orf50	-0.0294958	0.231468
C1orf52	0.264321	0.368374
C1orf53	0.197817	0.555237
C1orf54	0.258655	0.81772
C1orf56	0.378403	0.360623
C1orf74	0.179284	0.361596
C2	0.224194	0.613385
C20orf144	0.0527801	0.245215
C20orf202	0.0940952	0.0786585
C20orf204	0.276801	0.18396
C20orf96	0.30362	0.627027
C21orf58	0.359649	0.352276
C21orf91	0.394999	0.309571
C22orf15	0.282297	0.144202
C22orf23	-0.236698	0.370024
C22orf31	0.262945	0.157686
C22orf39	0.198241	0.382763
C2CD2	0.161779	0.366642
C2CD2L	-0.000414022	0.465127
C2CD3	0.0625704	0.3203
C2CD4A	0.101959	0.66196
C2CD4B	-0.0490063	0.754275
C2CD4C	-0.0208177	0.537158
C2CD4D	0.0959358	0.511721
C2CD5	-0.213729	0.411054
C2CD6	0.191692	0.124115
C2orf15	0.21936	0.430724
C2orf42	0.165751	0.179135
C2orf49	-0.0370105	0.390949
C2orf66	0.000515304	0.141217
C2orf68	0.237059	0.283362
C2orf69	0.038269	0.429068
C2orf72	0.19245	1.3319
C2orf74	0.18637	0.201899
C2orf76	0.290519	0.454191
C2orf81	0.210399	0.179003
C2orf88	0.297384	0.494806
C2orf92	0.299084	0.245682
C3	0.36042	1.22143
C3AR1	0.367712	0.506599
C3orf18	0.332727	0.404905
C3orf20	-0.143153	0.0818879
C3orf33	0.0543403	0.272023
C3orf38	0.196893	0.302885
C3orf49	0.108852	0.100161
C3orf52	0.115644	0.408244
C3orf62	0.0749356	0.323023
C3orf70	0.602707	0.650564
C3orf80	0.245673	0.33143
C4A	0.0528821	1.02696
C4B	0.0878422	1.04292
C4BPA	0.0466314	0.207271
C4BPB	-0.127472	0.0744661
C4orf19	0.246079	0.479566
C4orf3	0.147916	0.324653
C4orf33	0.249329	0.273039
C4orf46	0.200365	0.319734
C4orf50	0.0299398	0.107952
C5	-0.117187	0.573594
C5AR1	0.164813	0.683692
C5AR2	0.173392	0.101192
C5orf15	0.0490806	0.473752
C5orf22	0.190588	0.362355
C5orf24	-0.151102	0.534211
C5orf34	-0.157758	0.265135
C5orf58	-0.0512105	0.0715738
C5orf63	0.187153	0.247453
C6	0.202501	0.395037
C6orf120	-0.0815159	0.540379
C6orf132	0.140038	0.468411
C6orf136	0.325436	0.351313
C6orf141	0.258364	0.315539
C6orf163	-0.106199	0.479329
C6orf226	0.278895	0.6463
C6orf47	0.108514	0.243674
C6orf52	0.163901	0.827299
C6orf58	0.143117	0.0920522
C6orf62	0.134299	0.535248
C6orf89	0.46953	0.275929
C7	0.478229	1.27202
C7orf25	0.1897	0.0948688
C7orf50	-0.0768209	0.523803
C7orf57	0.142874	0.257613
C8G	0.186446	0.352314
C8orf33	0.487716	0.611864
C8orf48	-0.0161518	0.131027
C8orf58	0.178732	0.342812
C8orf76	0.0160691	0.319839
C8orf82	0.0469561	0.609076
C8orf88	0.537307	0.586963
C9orf152	0.326782	0.769178
C9orf153	0.0915984	0.0954475
C9orf163	0.382265	0.284437
C9orf40	0.0708948	0.331125
C9orf43	0.406573	0.209378
C9orf50	-0.0597771	0.0967052
C9orf72	-0.115826	0.463921
C9orf78	0.246923	0.259707
C9orf85	0.282253	0.371916
CA11	0.466315	0.632509
CA12	0.125382	0.603402
CA13	0.162767	0.570895
CA14	0.321251	0.511572
CA2	0.221658	0.665119
CA3	0.164086	1.18551
CA4	-0.0488958	0.433014
CA5B	0.0408212	0.446883
CA8	0.331058	0.494328
CA9	-0.0133927	0.18656
CAAP1	0.157215	0.401284
CAB39	0.264041	0.438913
CAB39L	0.180347	0.619823
CABCOCO1	0.159382	0.793609
CABIN1	0.140857	0.326457
CABLES1	0.436393	0.31632
CABLES2	0.492573	0.324223
CABP1	0.252375	0.209806
CABP4	0.4402	0.428507
CABP7	0.0216218	0.0823345
CABYR	0.151731	0.188275
CACFD1	0.281294	0.688203
CACHD1	0.749781	0.56393
CACNA1A	0.0111551	0.100171
CACNA1C	0.478233	0.542921
CACNA1D	0.383271	1.10305
CACNA1E	0.054378	0.0315735
CACNA1F	-0.0576142	0.114234
CACNA1G	0.197879	0.481917
CACNA1H	0.295506	0.869758
CACNA1I	0.118745	0.209445
CACNA1S	0.195692	0.154912
CACNA2D1	0.513576	0.838364
CACNA2D2	0.360688	0.396213
CACNA2D3	0.450546	0.443001
CACNA2D4	0.444675	0.142521
CACNB1	0.0724725	0.40119
CACNB2	0.313345	0.367154
CACNB3	0.174036	0.439995
CACNB4	0.420613	0.252368
CACNG4	0.362255	1.19263
CACNG8	0.0211487	0.0723652
CACTIN	0.29223	0.233149
CACUL1	0.24766	0.295437
CACYBP	-0.044709	0.35679
CAD	0.260722	0.400648
CADM1	0.0599958	0.694909
CADM2	-0.0183614	0.614838
CADM3	0.294538	0.440051
CADM4	0.461999	0.507349
CADPS	0.299659	0.848603
CADPS2	-0.166675	0.527244
CAGE1	-0.270815	0.0914752
CAHM	0.406247	0.356881
CALB1	0.0107672	0.0595155
CALB2	0.162116	0.203632
CALCB	0.299822	0.11443
CALCOCO1	0.415764	0.35092
CALCOCO2	0.352601	0.290912
CALCR	0.219981	0.0688995
CALCRL	0.38901	0.687444
CALD1	0.564466	0.785159
CALHM2	0.512871	0.526879
CALHM5	0.508634	0.26015
CALHM6	0.329897	0.312643
CALM1	0.4929	0.44229
CALM2	0.0127135	0.289522
CALM3	-0.227192	0.304664
CALML4	0.0443748	0.0593966
CALML6	-0.0193659	0.295513
CALN1	0.202756	0.277171
CALR	0.467619	0.517006
CALU	0.00503488	0.500885
CALY	-0.115046	0.169967
CAMK1	0.404348	0.543587
CAMK1D	0.508819	0.603696
CAMK1G	0.242813	0.397691
CAMK2A	0.320443	0.23006
CAMK2B	0.495737	0.660047
CAMK2D	-0.0572855	0.548984
CAMK2G	0.599009	0.376844
CAMK2N1	0.312714	1.01502
CAMK2N2	0.151883	0.597521
CAMK4	0.464884	0.498509
CAMKK1	0.246825	0.423146
CAMKK2	0.268	0.926475
CAMKMT	0.00649819	0.286531
CAMLG	-0.0400664	0.289899
CAMP	0.132793	0.29728
CAMSAP1	-0.0467875	0.422588
CAMSAP2	0.319121	0.372229
CAMSAP3	0.358778	0.576244
CAMTA1	0.0185431	0.250534
CAMTA2	0.10475	0.404278
CAND1	-0.0530157	0.389678
CAND2	0.632185	0.451039
CANT1	0.359958	0.681762
CANX	0.398442	0.475573
CAP1	0.415556	0.305777
CAP2	0.540761	0.740718
CAPG	0.477666	0.820624
CAPN1	0.20823	0.36464
CAPN10	0.236222	0.322551
CAPN11	-0.0124401	0.139238
CAPN12	0.0771479	0.220759
CAPN13	0.315817	0.515237
CAPN14	-0.0257517	0.144524
CAPN15	0.32407	0.382595
CAPN2	0.211622	0.574345
CAPN3	0.224121	0.163539
CAPN5	-0.0147133	0.842404
CAPN6	0.417484	0.800402
CAPN7	-0.076579	0.351606
CAPN8	0.437648	0.432265
CAPN9	-0.0728537	0.570035
CAPNS1	0.145984	0.443835
CAPRIN1	0.129642	0.423986
CAPRIN2	0.28746	0.320636
CAPS	0.159825	0.780855
CAPS2	0.192998	0.324159
CAPZA1	0.140846	0.349686
CAPZA2	0.176012	0.380702
CAPZB	0.120567	0.316939
CARD10	0.0335002	0.449573
CARD11	0.602312	0.488456
CARD14	-0.0123842	0.261929
CARD16	0.481989	0.508206
CARD19	-0.0776911	0.371765
CARD6	0.460767	0.381607
CARD8	0.47553	0.263114
CARD9	0.505311	0.299448
CARF	0.237309	0.24089
CARHSP1	-0.119646	0.381621
CARM1	0.170775	0.442394
CARMIL1	-0.0296001	0.473621
CARMIL2	0.380592	0.333658
CARMIL3	0.26429	0.121095
CARNMT1	0.331144	0.353145
CARNS1	0.15618	0.276967
CARS1	-0.184156	0.33135
CARS2	0.0958947	0.340599
CASC11	0.0779757	0.232331
CASC18	-0.0388434	0.113356
CASC2	0.0619305	0.137861
CASC3	0.171363	0.280355
CASC8	0.117715	0.346718
CASC9	0.115329	0.228709
CASD1	-0.0413048	0.491227
CASK	-0.162359	0.304929
CASKIN1	0.423884	0.39768
CASKIN2	0.452373	0.374382
CASP1	0.554342	0.535546
CASP10	0.208518	0.44601
CASP2	0.188766	0.527554
CASP3	0.181304	0.407511
CASP4	0.367957	0.530017
CASP5	0.0839426	0.0737497
CASP6	0.331224	0.360397
CASP7	0.409242	0.657814
CASP8	0.114029	0.435397
CASP8AP2	0.281856	0.475351
CASP9	-0.132363	0.311851
CASQ1	0.379768	0.824316
CASQ2	0.299661	0.804978
CASR	0.262536	0.0749037
CASS4	0.37329	0.211241
CAST	0.255874	0.478964
CASTOR1	0.126249	0.154337
CASTOR2	0.0952148	0.427493
CASZ1	0.0423338	0.448003
CAT	0.195651	0.523319
CATIP	0.184092	0.30736
CATSPER1	-0.111446	0.0843455
CATSPER2	0.317324	0.347515
CATSPER3	0.337311	0.174988
CATSPERB	0.112877	0.295801
CATSPERE	-0.269496	0.138543
CATSPERG	0.112198	0.211045
CAV1	0.558266	0.916504
CAV2	0.583926	0.666153
CAVIN1	0.437757	0.852731
CAVIN2	0.376841	0.935374
CAVIN3	0.120562	0.844057
CAVIN4	-0.0191604	0.4142
CBARP	-0.0101636	0.2384
CBFA2T2	-0.0618975	0.583274
CBFA2T3	0.0358283	0.550137
CBFB	0.262823	0.438279
CBL	0.522101	0.368858
CBLB	0.229179	0.333085
CBLC	-0.00661391	0.986254
CBLL1	0.00871536	0.654299
CBLN1	-0.0197842	0.269397
CBLN3	0.216378	0.43934
CBLN4	0.0878303	0.0978024
CBR1	0.51391	0.49236
CBR3	0.0189527	0.82777
CBR4	0.363436	0.494664
CBS	0.0624474	0.530543
CBX1	0.145702	0.343078
CBX2	0.366154	0.564925
CBX3	0.375317	0.433953
CBX4	0.313502	0.774193
CBX5	-0.188525	0.420874
CBX6	0.0622867	0.52518
CBX7	0.666357	0.463484
CBX8	0.487786	0.502452
CBY1	0.331791	0.384
CBY3	0.069599	0.142845
CC2D1A	-0.118492	0.34429
CC2D1B	-0.158563	0.247096
CC2D2A	0.172944	0.375082
CC2D2B	0.0424605	0.0956444
CCAR1	0.0499461	0.372039
CCAR2	0.0885477	0.366007
CCBE1	0.357681	0.367623
CCDC102A	0.25789	0.43957
CCDC102B	0.320784	0.228859
CCDC106	0.16857	0.503179
CCDC107	-0.0619167	0.520631
CCDC110	0.143238	0.456551
CCDC112	0.269107	0.438797
CCDC115	-0.165821	0.323357
CCDC116	0.205664	0.114638
CCDC117	-0.181211	0.405608
CCDC12	-0.0771629	0.430094
CCDC120	0.0724957	0.397648
CCDC121	0.0224346	0.322982
CCDC122	0.0972731	0.341288
CCDC124	-0.0494299	0.546592
CCDC125	0.381352	0.44044
CCDC126	-0.0539294	0.339086
CCDC127	-0.187488	0.210155
CCDC13	0.027729	0.0877829
CCDC134	-0.130682	0.45355
CCDC136	0.375082	0.522289
CCDC137	-0.111428	0.466
CCDC138	0.14576	0.330162
CCDC14	0.260232	0.463606
CCDC141	-0.259778	0.413114
CCDC142	0.248885	0.297547
CCDC144A	-0.0394879	0.27208
CCDC146	-0.0450934	0.471796
CCDC148	-0.220261	0.148175
CCDC149	0.388536	0.288782
CCDC15	0.0452378	0.338863
CCDC150	0.333605	0.0774624
CCDC152	0.100992	0.194001
CCDC154	0.131111	0.900584
CCDC157	0.284463	0.207399
CCDC158	-0.0685025	0.190424
CCDC159	0.348238	0.48415
CCDC163	0.0133136	0.4845
CCDC167	0.22154	0.682968
CCDC168	-0.0198871	0.0302083
CCDC17	0.153097	0.433902
CCDC170	0.0456942	0.396759
CCDC171	0.296138	0.161087
CCDC174	0.0645061	0.212418
CCDC18	0.354941	0.152233
CCDC180	0.103974	0.17963
CCDC181	0.385489	0.174584
CCDC183	-0.138856	0.353342
CCDC184	-0.0305144	0.347193
CCDC186	-0.229868	0.674718
CCDC187	0.194189	0.284961
CCDC188	0.0534902	0.270538
CCDC191	-0.143602	0.319128
CCDC192	-0.0752248	0.114685
CCDC194	0.172221	0.246604
CCDC196	-0.0111978	0.0487087
CCDC200	0.165137	0.131036
CCDC22	0.361973	0.523145
CCDC24	0.312322	0.463948
CCDC25	0.238177	0.343385
CCDC26	-0.101693	0.0845868
CCDC28A	0.238835	0.501861
CCDC28B	-0.0346994	0.398119
CCDC3	0.194972	0.871444
CCDC30	-0.262144	0.230042
CCDC32	0.0686777	0.287278
CCDC34	0.322124	0.369002
CCDC38	0.11906	0.0330011
CCDC39	-0.107014	0.0796536
CCDC40	0.398441	0.36881
CCDC43	0.157121	0.286453
CCDC47	0.38506	0.424293
CCDC50	0.216258	0.477717
CCDC51	0.234738	0.374598
CCDC57	0.350693	0.400135
CCDC59	0.189888	0.26022
CCDC6	0.366209	0.522423
CCDC61	0.169998	0.436049
CCDC62	-0.0134667	0.112238
CCDC65	0.184552	0.300693
CCDC66	0.0262057	0.362318
CCDC68	0.310647	0.460957
CCDC69	0.56112	0.763603
CCDC7	-0.0170146	0.249348
CCDC71	0.0353778	0.396093
CCDC71L	0.185656	0.428062
CCDC73	0.0775415	0.0549244
CCDC74A	-0.0230393	0.850664
CCDC74B	-0.102164	0.70438
CCDC77	0.0857385	0.288498
CCDC78	0.317722	0.738513
CCDC8	0.538567	0.688915
[truncated: 14,060 more rows]
